# Supplementary material for: Single-cell RNA sequencing analysis of shrimp immune cells identifies macrophage-like phagocytes
Source: eLife journal article supplement (doi:10.7554/elife.80127), 2022-10-06

Control: *Vibrio parahaemolyticus* ( $2 \times 10^6$  particles/g)

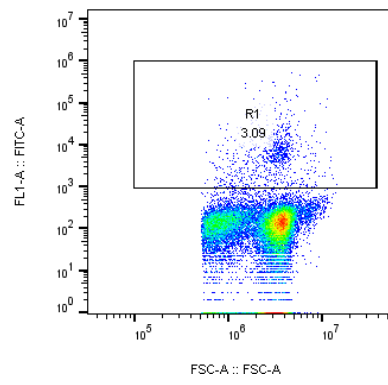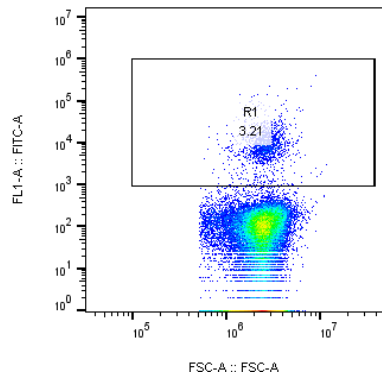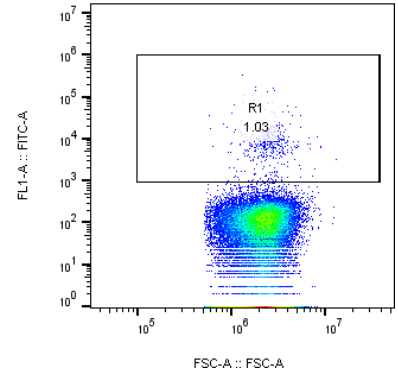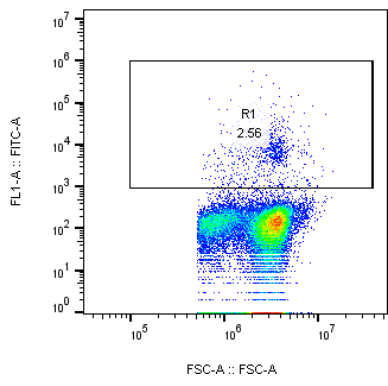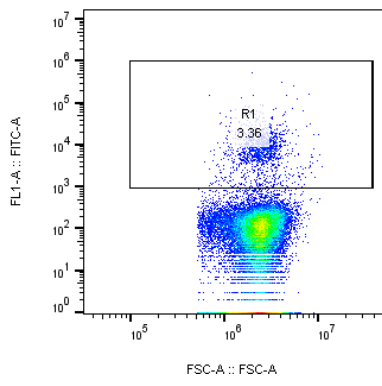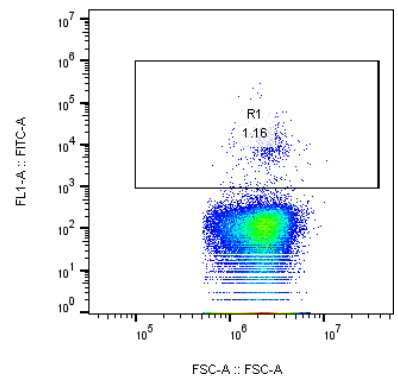

Cytochalasin D: *Vibrio parahaemolyticus* ( $2 \times 10^6$  particles/g) + cytochalasin D( $5 \mu\text{M/g}$ )

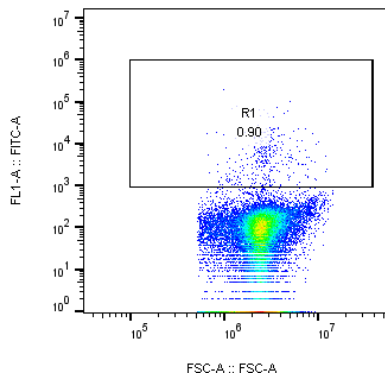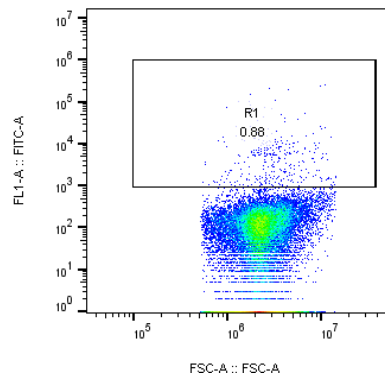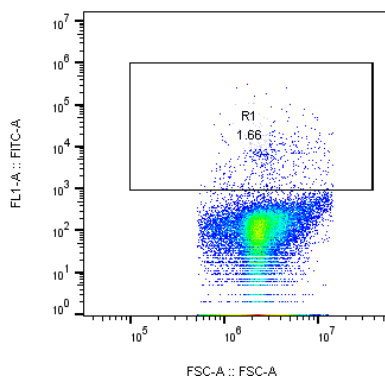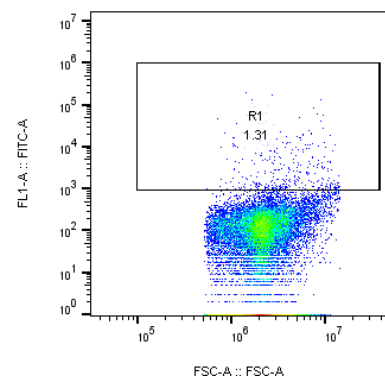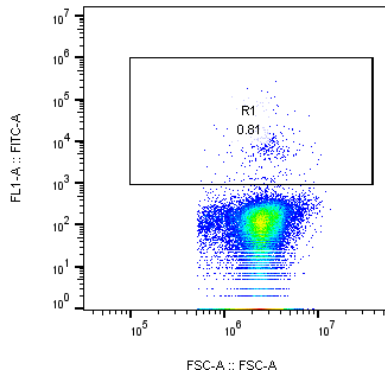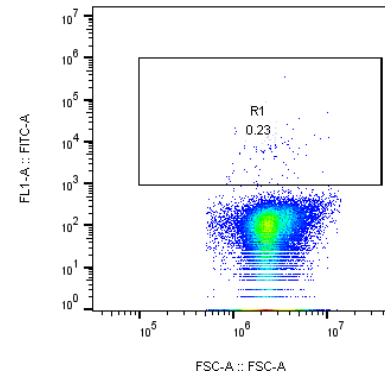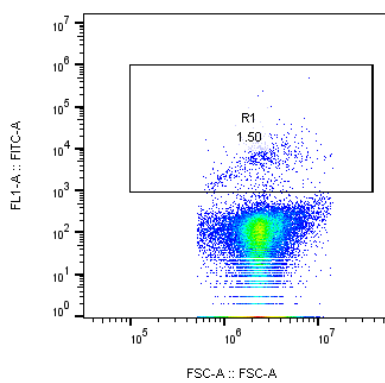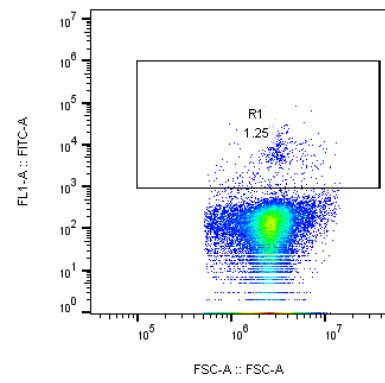

Supplement: supp [file elife-80127-supp-v1.zip]
