# Supplementary material for: Single-cell RNA sequencing analysis of shrimp immune cells identifies macrophage-like phagocytes
Source: eLife journal article supplement (doi:10.7554/elife.80127), 2022-10-06

A.

| sample | cells | UMI      | median UMI/cell | median genes/cell | Mitochondrial UMI ratio | Sequencing Saturation |
|--------|-------|----------|-----------------|-------------------|-------------------------|-----------------------|
| Ctrl   | 12544 | 72753244 | 5656            | 1089.5            | 1.03%                   | 67.00%                |
| rEGFP  | 12640 | 87298696 | 6837            | 1245              | 1.23%                   | 57.90%                |
| rCREG  | 9509  | 74762972 | 7916            | 1364              | 1.29%                   | 58.50%                |

B.

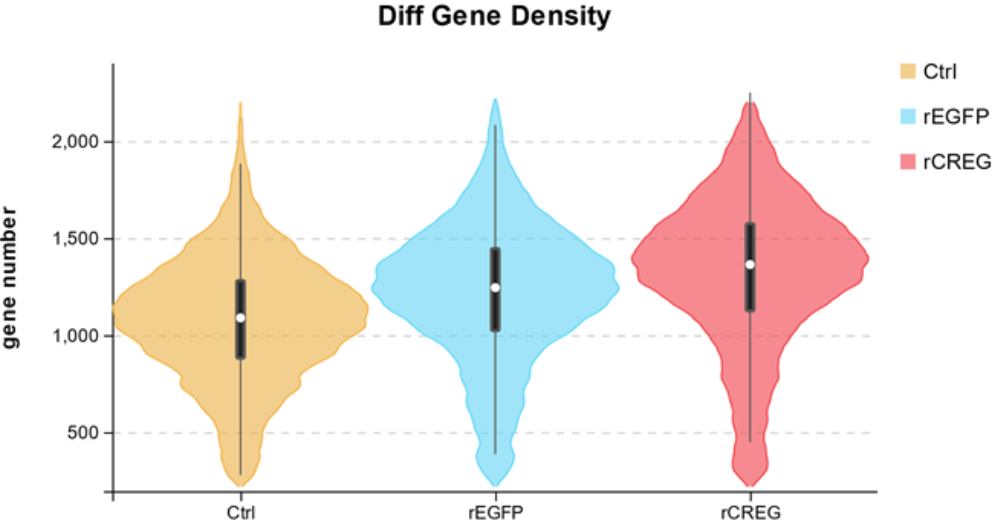

Supplement: supp [file elife-80127-supp-v1.zip]
