# Supplementary material for: Single-cell RNA sequencing analysis of shrimp immune cells identifies macrophage-like phagocytes
Source: eLife journal article supplement (doi:10.7554/elife.80127), 2022-10-06

A.

Granulocyte marker genes distribution

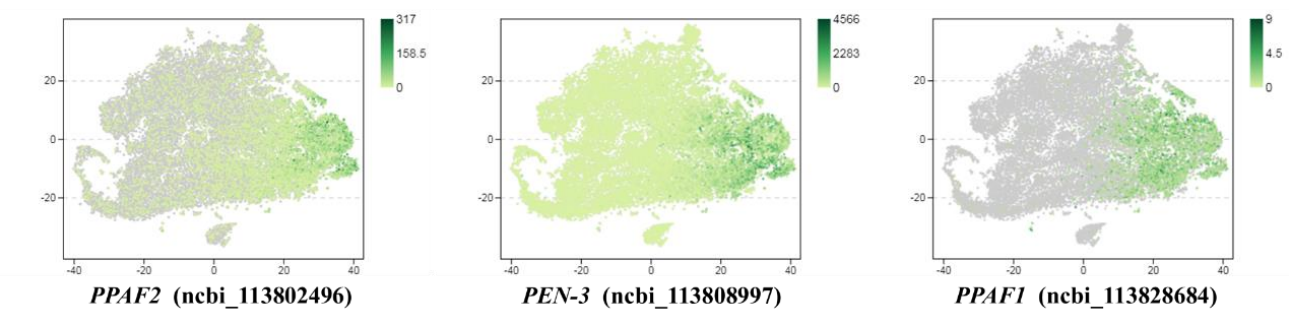

B.

Monocytic hemocyte marker genes distribution

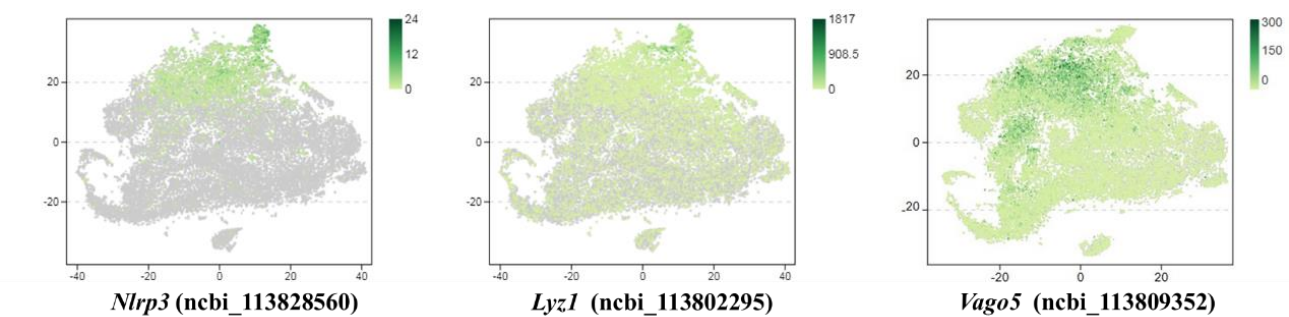

C.

Prohemocyte marker genes distribution

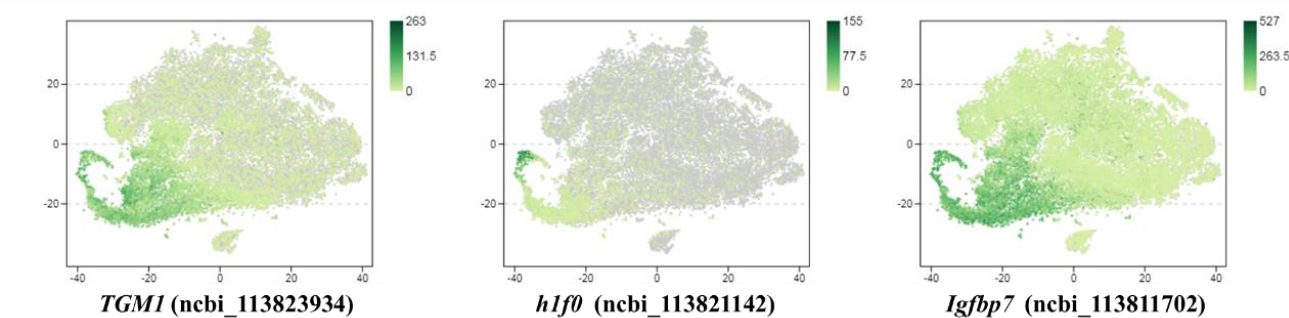

D.

Transitional cell marker genes distribution

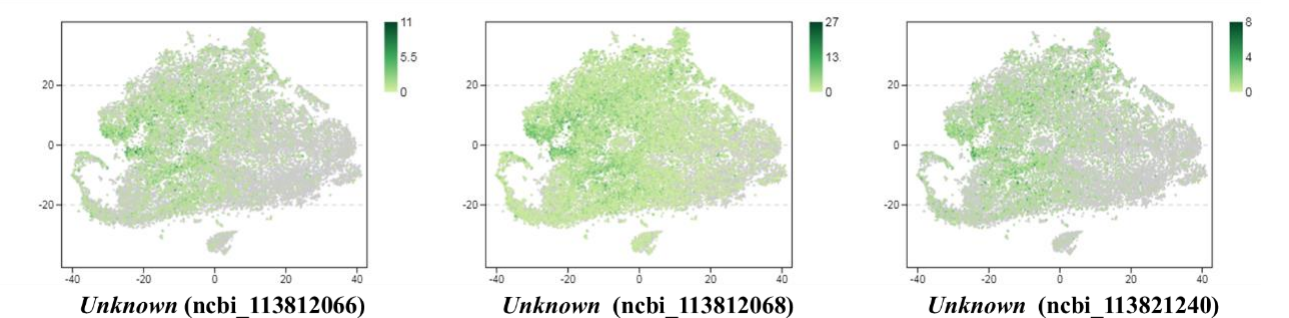

E.

Germ cell marker genes distribution

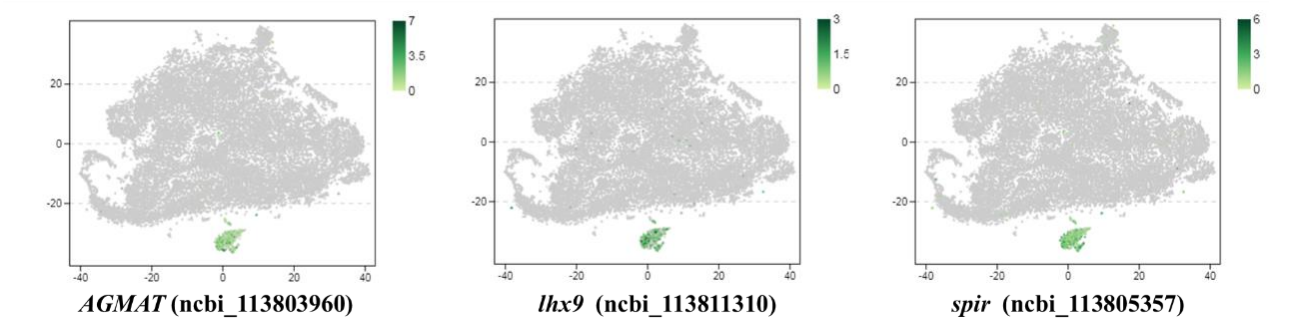

Supplement: supp [file elife-80127-supp-v1.zip]
