# Supplementary material for: Single-cell RNA sequencing analysis of shrimp immune cells identifies macrophage-like phagocytes
Source: eLife journal article supplement (doi:10.7554/elife.80127), 2022-10-06
Supplement: supp [file elife-80127-supp-v1.zip]

A.

### PH1 marker genes distribution

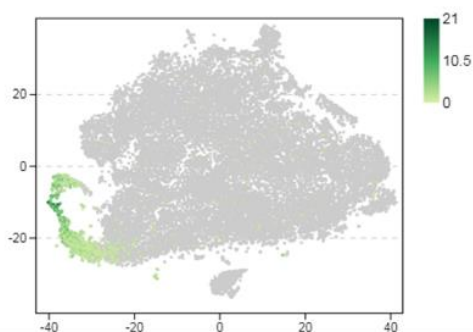

*CCNB3* (ncbi\_113829902)

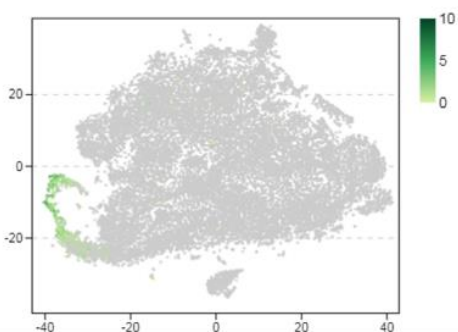

*INCENP* (ncbi\_113827798)

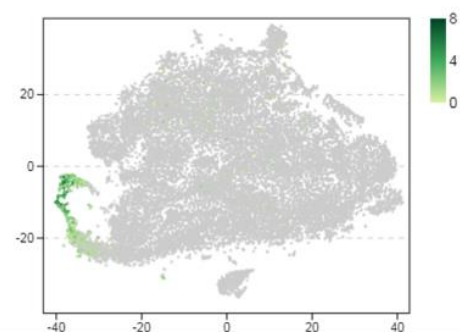

*PRC1* (ncbi\_113805259)

B.

### MH2 marker genes distribution

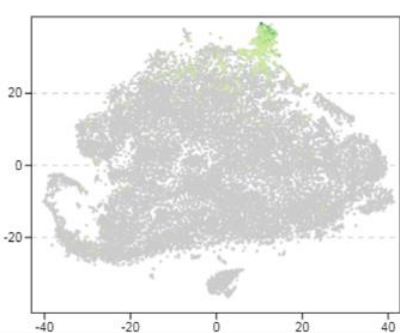

*Angpt4* (ncbi\_113804729)

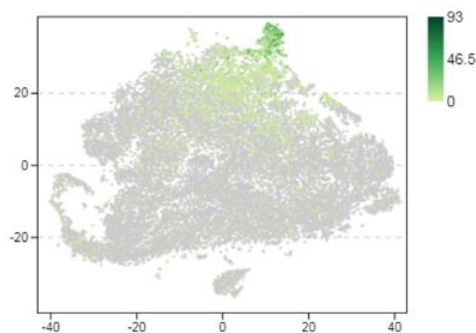

*ALF* (ncbi\_113820510)

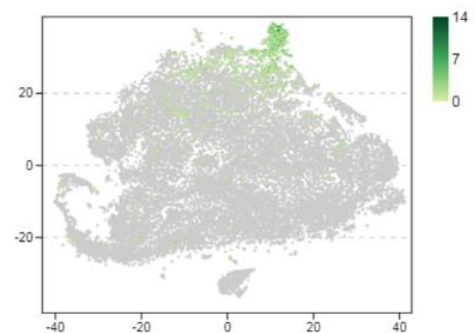

*ITGA2B* (ncbi\_113815644)

C.

### GH2 marker genes distribution

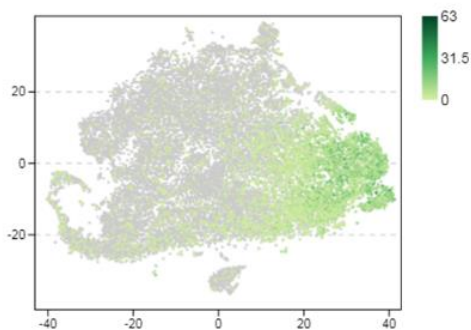

*Pxt* (ncbi\_113820150)

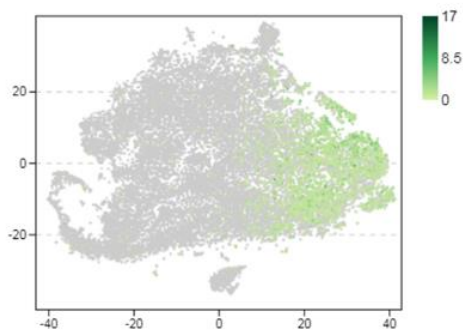

*SLC5A1* (ncbi\_113828571)

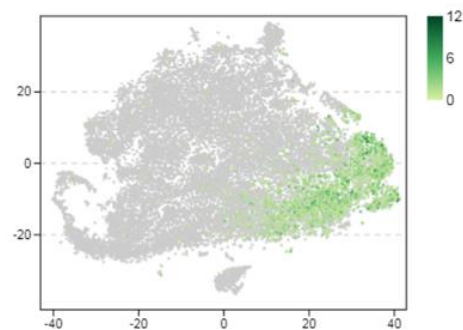

*snk* (ncbi\_113807427)
