# Supplementary material for: Single-cell RNA sequencing analysis of shrimp immune cells identifies macrophage-like phagocytes
Source: eLife. 2022 Oct 6;11:e80127. doi: 10.7554/eLife.80127 (PMC9584607; doi:10.7554/eLife.80127)
Supplement: Supplementary file 1. [file elife-80127-supp1.csv]

Target_Cluster	Gene ID	Gene Name	Target_Cluster_mean	Other_Cluster_mean	Log2FC	Pvalue	Qvalue	Symbol	Description	KEGG_A_class	KEGG_B_class	Pathway	K_ID	GO Component	GO Function	GO Process
4	ncbi_113825738	YBX1	27.71023355	12.8726217	1.106112961	0	0	YBX1	cold shock Y-box protein [Cherax quadricarinatus]	-	-	-	-	-	-	-
4	ncbi_113819864	eef1b	37.49887994	22.54638276	0.733951512	7.29E-273	1.95E-268	eef1b	elongation factor 1-beta' [Papilio xuthus]	-	-	-	-	-	-	-
4	ncbi_113820946	eef1a	87.97658874	61.49717164	0.516599602	7.17E-259	1.92E-254	eef1a	elongation factor 1-alpha [Litopenaeus vannamei]	Genetic Information Processing;Human Diseases	Translation;Infectious diseases	ko03013//RNA transport;ko05134//Legionellosis	K03231;K03231	-	-	-
4	ncbi_113821241	ncbi_113821241	16.03766784	5.790193618	1.469780867	5.20E-233	1.39E-228	--	-	-	-	-	-	-	-	-
4	ncbi_113820238	RpL18	92.84886029	67.30361264	0.464200255	1.98E-232	5.30E-228	RpL18	ribosomal protein L18 [Litopenaeus vannamei]	Genetic Information Processing	Translation	ko03010//Ribosome	K02883	GO:0030529//intracellular ribonucleoprotein complex	-	GO:0010467//gene expression
4	ncbi_113812068	ncbi_113812068	9.896606674	2.367203469	2.063750226	3.71E-207	9.93E-203	--	-	-	-	-	-	-	-	-
4	ncbi_113803561	sqd	14.02744872	6.900457779	1.02348866	2.01E-200	5.37E-196	sqd	PREDICTED: RNA-binding protein squid-like isoform X6 [Hyalella azteca]	Organismal Systems	Development	ko04320//Dorso-ventral axis formation	K03102	-	-	-
4	ncbi_113829363	Ef1gamma	27.56479429	17.15788235	0.683955331	1.78E-191	4.77E-187	Ef1gamma	tail muscle elongation factor 1 gamma [Procambarus clarkii]	Human Diseases	Infectious diseases	ko05134//Legionellosis	K03233	-	GO:0008135//translation factor activity, RNA binding	GO:0010467//gene expression
4	ncbi_113805279	rpl-7	68.13170774	50.534817	0.431048664	2.30E-189	6.15E-185	rpl-7	ribosomal protein L7 [Litopenaeus vannamei]	Genetic Information Processing	Translation	ko03010//Ribosome	K02937	-	-	-
4	ncbi_113812069	ncbi_113812069	10.38973664	2.77978623	1.902113239	5.01E-184	1.34E-179	--	-	-	-	-	-	-	-	-
4	ncbi_113817911	RPL7A	25.15013838	16.75954102	0.585583698	1.18E-182	3.16E-178	RPL7A	PREDICTED: 60S ribosomal protein L7a-like [Limulus polyphemus]	Genetic Information Processing	Translation	ko03010//Ribosome	K02936	-	-	-
4	ncbi_113809517	RpS4	71.06001954	54.06810339	0.394260335	1.20E-173	3.20E-169	RpS4	PREDICTED: 40S ribosomal protein S4 [Microplitis demolitor]	Genetic Information Processing	Translation	ko03010//Ribosome	K02987	GO:0030529//intracellular ribonucleoprotein complex	GO:0003723//RNA binding;GO:0005198//structural molecule activity	GO:0010467//gene expression
4	ncbi_113824800	RPL22	24.95102104	16.55590633	0.591752864	4.68E-170	1.25E-165	RPL22	lymphoid organ expressed yellow head virus receptor protein, partial [Penaeus monodon]	Genetic Information Processing	Translation	ko03010//Ribosome	K02891	GO:0005622//intracellular	-	GO:0009987//cellular process
4	ncbi_113818471	Adarb1	27.09307559	17.03337595	0.669559777	1.64E-162	4.38E-158	Adarb1	PREDICTED: double-stranded RNA-specific editase 1-like [Hyalella azteca]	-	-	-	-	-	-	-
4	ncbi_113828518	rpl-36.A	37.81916979	26.14576688	0.532540307	6.33E-162	1.69E-157	rpl-36.A	ribosomal protein L44 [Procambarus clarkii]	Genetic Information Processing	Translation	ko03010//Ribosome	K02929	GO:0030529//intracellular ribonucleoprotein complex	-	-
4	ncbi_113800097	rpl4-a	22.63046073	14.54379802	0.637861888	8.05E-162	2.16E-157	rpl4-a	60S ribosomal protein L4 [Orchesella cincta]	Genetic Information Processing	Translation	ko03010//Ribosome	K02930	GO:0030529//intracellular ribonucleoprotein complex	GO:0008092//cytoskeletal protein binding	GO:0010467//gene expression
4	ncbi_113803286	ncbi_113803286	18.72457894	11.44864008	0.709757039	1.75E-156	4.69E-152	--	Sex-lethal [Eriocheir sinensis]	-	-	-	-	-	-	-
4	ncbi_113802303	Parcxpwex01	47.72814844	36.44884798	0.388967153	5.67E-151	1.52E-146	Parcxpwex01	ribosomal protein S3a [Fenneropenaeus merguiensis]	Genetic Information Processing	Translation	ko03010//Ribosome	K02984	GO:0015935//small ribosomal subunit	-	GO:0010467//gene expression
4	ncbi_113815515	rps7	50.02690091	37.65419872	0.409893337	2.82E-147	7.56E-143	rps7	ribosomal protein S7 [Procambarus clarkii]	Genetic Information Processing	Translation	ko03010//Ribosome	K02993	GO:0005924//cell-substrate adherens junction;GO:0015935//small ribosomal subunit;GO:0031988//membrane-bounded vesicle;GO:0043231//intracellular membrane-bounded organelle;GO:0044430//cytoskeletal part	GO:0003723//RNA binding	GO:0000956//nuclear-transcribed mRNA catabolic process;GO:0006412//translation;GO:0006613//cotranslational protein targeting to membrane;GO:0007049//cell cycle;GO:0016032//viral process;GO:0016072//rRNA metabolic process;GO:0032774//RNA biosynthetic process;GO:0042254//ribosome biogenesis;GO:0043624//cellular protein complex disassembly;GO:0048534//hematopoietic or lymphoid organ development
4	ncbi_113824223	RACK1	30.60391541	22.05928678	0.472330094	2.11E-144	5.66E-140	RACK1	receptor for activated protein kinase c1 [Penaeus monodon]	Human Diseases	Infectious diseases	ko05162//Measles	K14753	-	-	-
4	ncbi_113804422	rps6	18.14509714	11.90483149	0.60803258	8.81E-142	2.36E-137	rps6	ribosomal protein S6, partial [Macrobrachium olfersii]	Organismal Systems;Human Diseases;Environmental Information Processing;Genetic Information Processing;Environmental Information Processing;Organismal Systems;Environmental Information Processing;Environmental Information Processing;Human Diseases	Environmental adaptation;Cancers;Signal transduction;Translation;Signal transduction;Endocrine system;Signal transduction;Signal transduction;Drug resistance	ko04714//Thermogenesis;ko05205//Proteoglycans in cancer;ko04151//PI3K-Akt signaling pathway;ko03010//Ribosome;ko04150//mTOR signaling pathway;ko04910//Insulin signaling pathway;ko04066//HIF-1 signaling pathway;ko04371//Apelin signaling pathway;ko01521//EGFR tyrosine kinase inhibitor resistance	K02991;K02991;K02991;K02991;K02991;K02991;K02991;K02991;K02991	-	-	-
4	ncbi_113830368	rpl5-b	28.10177285	19.90784592	0.497324022	2.35E-141	6.30E-137	rpl5-b	PREDICTED: 60S ribosomal protein L5-like [Hyalella azteca]	Genetic Information Processing	Translation	ko03010//Ribosome	K02932	GO:0030529//intracellular ribonucleoprotein complex	GO:0005198//structural molecule activity;GO:0019843//rRNA binding	GO:0010467//gene expression
4	ncbi_113809655	La	10.56610713	3.98651236	1.406244895	9.47E-140	2.54E-135	La	PREDICTED: la protein homolog [Hyalella azteca]	-	-	-	-	-	-	-
4	ncbi_113804344	RPL23	84.29200638	63.6242109	0.405819965	3.33E-138	8.92E-134	RPL23	PREDICTED: 60S ribosomal protein L23 [Scleropages formosus]	Genetic Information Processing	Translation	ko03010//Ribosome	K02894	GO:0005924//cell-substrate adherens junction;GO:0015934//large ribosomal subunit;GO:0031988//membrane-bounded vesicle	GO:0003723//RNA binding;GO:0005198//structural molecule activity;GO:0008092//cytoskeletal protein binding	GO:0000956//nuclear-transcribed mRNA catabolic process;GO:0006412//translation;GO:0006606//protein import into nucleus;GO:0006613//cotranslational protein targeting to membrane;GO:0016032//viral process;GO:0030154//cell differentiation;GO:0032774//RNA biosynthetic process;GO:0043624//cellular protein complex disassembly;GO:0051231//spindle elongation
4	ncbi_113819857	eIF-5A	41.58902286	30.55556171	0.444767787	2.39E-135	6.39E-131	eIF-5A	eukaryotic translation initiation factor 5A [Litopenaeus vannamei]	-	-	-	-	-	GO:0008135//translation factor activity, RNA binding;GO:0043021//ribonucleoprotein complex binding	GO:0006448//regulation of translational elongation;GO:0006449//regulation of translational termination
4	ncbi_113821227	RpL14	103.0981156	80.08434198	0.364425864	5.85E-133	1.57E-128	RpL14	PREDICTED: 60S ribosomal protein L14 [Austrofundulus limnaeus]	Genetic Information Processing	Translation	ko03010//Ribosome	K02875	-	-	-
4	ncbi_113805443	H3f3a	42.82348083	30.41739133	0.493505638	1.77E-131	4.74E-127	H3f3a	PREDICTED: histone H3.3 isoform X1 [Nothobranchius furzeri]	Human Diseases;Human Diseases;Human Diseases	Cancers;Substance dependence;Immune diseases	ko05202//Transcriptional misregulation in cancers;ko05034//Alcoholism;ko05322//Systemic lupus erythematosus	K11253;K11253;K11253	GO:0000786//nucleosome;GO:0031981//nuclear lumen;GO:0031988//membrane-bounded vesicle	GO:0000977//RNA polymerase II regulatory region sequence-specific DNA binding;GO:0031490//chromatin DNA binding;GO:0046983//protein dimerization activity	GO:0001558//regulation of cell growth;GO:0006306//DNA methylation;GO:0006334//nucleosome assembly;GO:0006342//chromatin silencing;GO:0006950//response to stress;GO:0007599//hemostasis;GO:0035556//intracellular signal transduction
4	ncbi_113829287	RpLP0	64.66156679	49.04149953	0.398905373	2.46E-126	6.57E-122	RpLP0	PREDICTED: 60S acidic ribosomal protein P0 [Agrilus planipennis]	Genetic Information Processing	Translation	ko03010//Ribosome	K02941	GO:0030529//intracellular ribonucleoprotein complex	-	GO:0022613//ribonucleoprotein complex biogenesis;GO:0034645//cellular macromolecule biosynthetic process
4	ncbi_113808197	RPSA	20.55723459	14.24966864	0.528717832	7.83E-123	2.10E-118	RPSA	laminin receptor [Litopenaeus vannamei]	Genetic Information Processing	Translation	ko03010//Ribosome	K02998	-	-	-
4	ncbi_113826188	Nacalpha	15.53744475	9.355421673	0.731874675	9.08E-120	2.43E-115	Nacalpha	nascent polypeptide-associated complex alpha [Penaeus monodon]	-	-	-	-	-	-	-
4	ncbi_113818569	ncbi_113818569	18.80885014	13.27478866	0.502722761	5.83E-111	1.56E-106	--	-	-	-	-	-	-	-	-
4	ncbi_113828520	ncbi_113828520	14.80690886	9.685514192	0.612369943	3.02E-109	8.08E-105	--	-	-	-	-	-	-	-	-
4	ncbi_113810722	AGAP006782	34.68248585	25.65079289	0.435203885	3.55E-108	9.50E-104	AGAP006782	adenine nucleotide translocase 2 [Litopenaeus vannamei]	Human Diseases;Human Diseases;Human Diseases;Environmental Information Processing;Cellular Processes;Human Diseases;Environmental Information Processing;Cellular Processes	Neurodegenerative diseases;Infectious diseases;Infectious diseases;Signal transduction;Cell growth and death;Neurodegenerative diseases;Signal transduction;Cell growth and death	ko05016//Huntington disease;ko05164//Influenza A;ko05166//HTLV-I infection;ko04022//cGMP - PKG signaling pathway;ko04217//Necroptosis;ko05012//Parkinson disease;ko04020//Calcium signaling pathway;ko04218//Cellular senescence	K05863;K05863;K05863;K05863;K05863;K05863;K05863;K05863	-	-	-
4	ncbi_113826801	RpS15Aa	49.50858598	38.55068972	0.360922073	4.47E-108	1.20E-103	RpS15Aa	ribosomal protein S24 [Marsupenaeus japonicus]	Genetic Information Processing	Translation	ko03010//Ribosome	K02957	GO:0015935//small ribosomal subunit	GO:0005198//structural molecule activity	GO:0010467//gene expression;GO:0051231//spindle elongation
4	ncbi_113815887	RpLP1	119.648717	88.72742012	0.431353001	1.81E-107	4.86E-103	RpLP1	ribosomal protein P1 [Palaemon varians]	Genetic Information Processing	Translation	ko03010//Ribosome	K02942	GO:0015934//large ribosomal subunit	GO:0005198//structural molecule activity	GO:0010467//gene expression;GO:0034645//cellular macromolecule biosynthetic process
4	ncbi_113815231	RpS25	62.03932301	47.90638477	0.372964998	3.39E-100	9.07E-96	RpS25	S25e ribosomal protein [Platystomos albinus]	Genetic Information Processing	Translation	ko03010//Ribosome	K02975	-	-	-
4	ncbi_113804715	Rpl35	35.83865301	27.57779335	0.378009391	5.75E-96	1.54E-91	Rpl35	ribosomal protein L35 [Procambarus clarkii]	Genetic Information Processing	Translation	ko03010//Ribosome	K02918	-	-	-
4	ncbi_113820344	ncbi_113820344	15.01564413	7.537010713	0.994402016	6.89E-90	1.84E-85	--	-	-	-	-	-	-	-	-
4	ncbi_113828963	RpL3	28.12214321	21.79572834	0.367661133	5.19E-87	1.39E-82	RpL3	ribosomal protein L3 [Penaeus monodon]	Genetic Information Processing	Translation	ko03010//Ribosome	K02925	GO:0030529//intracellular ribonucleoprotein complex	-	GO:0010467//gene expression
4	ncbi_113814557	Ptprt	1.265585696	0.960000246	0.398698519	4.20E-84	1.12E-79	Ptprt	PREDICTED: receptor-type tyrosine-protein phosphatase alpha-like [Hyalella azteca]	Cellular Processes;Organismal Systems;Human Diseases;Environmental Information Processing	Cellular community - eukaryotes;Endocrine system;Endocrine and metabolic diseases;Signaling molecules and interaction	ko04520//Adherens junction;ko04910//Insulin signaling pathway;ko04931//Insulin resistance;ko04514//Cell adhesion molecules (CAMs)	K05695;K05695;K05695;K05695	-	-	-
4	ncbi_113808957	ncbi_113808957	27.21836875	14.40344558	0.918166633	4.94E-83	1.32E-78	--	PREDICTED: neurogenic locus notch homolog protein 1-like [Hyalella azteca]	-	-	-	-	-	-	-
4	ncbi_113811251	rps11	26.10644907	20.36238849	0.358499441	1.29E-81	3.45E-77	rps11	ribosomal protein S11 [Rimicaris exoculata]	Genetic Information Processing	Translation	ko03010//Ribosome	K02949	GO:0030529//intracellular ribonucleoprotein complex	-	GO:0010467//gene expression
4	ncbi_113802865	ncbi_113802865	9.413373273	4.757762867	0.984428436	6.79E-79	1.82E-74	--	-	-	-	-	-	-	-	-
4	ncbi_113812066	ncbi_113812066	1.922271136	0.456754365	2.073321422	5.21E-77	1.40E-72	--	-	-	-	-	-	-	-	-
4	ncbi_113799988	RPS5	17.07731833	12.93749398	0.400523253	4.05E-71	1.08E-66	RPS5	PREDICTED: 40S ribosomal protein S5 [Hyalella azteca]	Genetic Information Processing	Translation	ko03010//Ribosome	K02989	GO:0005924//cell-substrate adherens junction;GO:0015935//small ribosomal subunit;GO:0031988//membrane-bounded vesicle	GO:0005198//structural molecule activity;GO:0044822//poly(A) RNA binding	GO:0006448//regulation of translational elongation
4	ncbi_113808319	Erap1	1.328111156	0.983812999	0.432919876	4.44E-71	1.19E-66	Erap1	PREDICTED: endoplasmic reticulum aminopeptidase 1 isoform X2 [Copidosoma floridanum]	Organismal Systems	Endocrine system	ko04614//Renin-angiotensin system	K11141	-	-	-
4	ncbi_113821081	ncbi_113821081	1.554063232	1.117901673	0.475251907	2.86E-65	7.67E-61	--	-	-	-	-	-	-	-	-
4	ncbi_113809880	NPM3	4.846369748	1.815266228	1.416723328	3.83E-64	1.03E-59	NPM3	PREDICTED: nucleoplasmin-like protein ANO39 isoform X2 [Hyalella azteca]	-	-	-	-	-	-	-
4	ncbi_113822949	Ahcy13	3.083363321	1.018773769	1.597671177	9.17E-59	2.46E-54	Ahcy13	PREDICTED: adenosylhomocysteinase-like isoform X1 [Hyalella azteca]	Metabolism;Metabolism	Global and overview maps;Amino acid metabolism	ko01100//Metabolic pathways;ko00270//Cysteine and methionine metabolism	K01251;K01251	-	GO:0003824//catalytic activity	GO:0044237//cellular metabolic process
4	ncbi_113818688	MAP2K7	0.651914306	0.472950987	0.462991656	2.42E-57	6.48E-53	MAP2K7	mitogen-activated protein kinase kinase 7 [Litopenaeus vannamei]	Genetic Information Processing;Cellular Processes;Environmental Information Processing;Human Diseases;Human Diseases;Environmental Information Processing;Human Diseases;Cellular Processes;Organismal Systems;Organismal Systems;Human Diseases;Environmental Information Processing;Organismal Systems;Organismal Systems;Environmental Information Processing;Organismal Systems;Organismal Systems;Organism…	Folding, sorting and degradation;Cellular community - eukaryotes;Signal transduction;Infectious diseases;Cardiovascular diseases;Signal transduction;Infectious diseases;Cell growth and death;Endocrine system;Nervous system;Infectious diseases;Signal transduction;Endocrine system;Immune system;Signal transduction;Immune system;Immune system;Development;Immune system	ko04141//Protein processing in endoplasmic reticulum;ko04530//Tight junction;ko04013//MAPK signaling pathway - fly;ko05164//Influenza A;ko05418//Fluid shear stress and atherosclerosis;ko04010//MAPK signaling pathway;ko05169//Epstein-Barr virus infection;ko04214//Apoptosis - fly;ko04926//Relaxin signaling pathway;ko04722//Neurotrophin signaling pathway;ko05167//Kaposi sarcoma-associated herpesviru…	K04431;K04431;K04431;K04431;K04431;K04431;K04431;K04431;K04431;K04431;K04431;K04431;K04431;K04431;K04431;K04431;K04431;K04431;K04431	-	-	-
4	ncbi_113814389	Catsup	2.099673007	1.54213531	0.445235311	2.24E-56	6.00E-52	Catsup	PREDICTED: protein catecholamines up-like [Hyalella azteca]	-	-	-	-	GO:0016020//membrane;GO:0043231//intracellular membrane-bounded organelle	GO:0046915//transition metal ion transmembrane transporter activity	GO:0006829//zinc II ion transport;GO:0072507//divalent inorganic cation homeostasis
4	ncbi_113830543	SLC12A2	1.132457443	0.801853366	0.498046494	2.57E-56	6.89E-52	SLC12A2	Na+/K+/2Cl- cotransporter protein [Marsupenaeus japonicus]	Organismal Systems;Human Diseases;Organismal Systems	Digestive system;Infectious diseases;Digestive system	ko04972//Pancreatic secretion;ko05110//Vibrio cholerae infection;ko04970//Salivary secretion	K10951;K10951;K10951	-	-	-
4	ncbi_113810599	rpl18a	17.25053368	13.21783839	0.384154733	6.63E-56	1.78E-51	rpl18a	PREDICTED: 60S ribosomal protein L18a isoform X1 [Protobothrops mucrosquamatus]	Genetic Information Processing	Translation	ko03010//Ribosome	K02882	GO:0015934//large ribosomal subunit	GO:0003723//RNA binding	GO:0010467//gene expression
4	ncbi_113811036	Tango1	3.447739801	2.155557057	0.677590148	3.79E-55	1.02E-50	Tango1	PREDICTED: transport and Golgi organization protein 1-like isoform X5 [Hyalella azteca]	-	-	-	-	-	-	-
4	ncbi_113817797	hyou1	2.31373276	1.552033771	0.576062291	7.33E-55	1.96E-50	hyou1	PREDICTED: hypoxia up-regulated protein 1 [Trichogramma pretiosum]	Genetic Information Processing	Folding, sorting and degradation	ko04141//Protein processing in endoplasmic reticulum	K09486	-	-	-
4	ncbi_113812814	PPAF2	3.124773716	0.980065613	1.672801476	1.06E-53	2.84E-49	PPAF2	masquerade-like serine proteinase-like protein 3 [Penaeus monodon]	-	-	-	-	-	-	-
4	ncbi_113818950	GDPD1	1.049547915	0.749600487	0.485574237	4.11E-53	1.10E-48	GDPD1	PREDICTED: LOW QUALITY PROTEIN: glycerophosphodiester phosphodiesterase domain-containing protein 1-like [Apis mellifera]	Metabolism	Lipid metabolism	ko00565//Ether lipid metabolism	K22387	-	GO:0008081//phosphoric diester hydrolase activity	-
4	ncbi_113817878	ncbi_113817878	15.01267452	10.22532538	0.554034265	4.47E-52	1.20E-47	--	-	-	-	-	-	-	-	-
4	ncbi_113824269	ncbi_113824269	0.905535578	0.61095479	0.5677057	7.92E-52	2.12E-47	--	PREDICTED: furin-like protease 2 [Neodiprion lecontei]	-	-	-	-	-	-	-
4	ncbi_113800191	ncbi_113800191	1.03078963	0.725743476	0.506218325	6.04E-51	1.62E-46	--	-	-	-	-	-	-	-	-
4	ncbi_113803885	GBETA1	3.040543439	2.332329501	0.38255758	2.05E-50	5.49E-46	GBETA1	G protein beta 1 subunit [Litopenaeus vannamei]	Human Diseases;Environmental Information Processing;Human Diseases;Environmental Information Processing;Organismal Systems;Organismal Systems;Organismal Systems;Human Diseases;Organismal Systems;Organismal Systems;Organismal Systems;Organismal Systems;Environmental Information Processing;Organismal Systems;Human Diseases;Organismal Systems;Human Diseases;Organismal Systems;Organismal Systems	Cancers;Signal transduction;Substance dependence;Signal transduction;Immune system;Nervous system;Endocrine system;Infectious diseases;Nervous system;Nervous system;Nervous system;Nervous system;Signal transduction;Nervous system;Infectious diseases;Environmental adaptation;Substance dependence;Sensory system;Sensory system	ko05200//Pathways in cancer;ko04151//PI3K-Akt signaling pathway;ko05034//Alcoholism;ko04014//Ras signaling pathway;ko04062//Chemokine signaling pathway;ko04723//Retrograde endocannabinoid signaling;ko04926//Relaxin signaling pathway;ko05163//Human cytomegalovirus infection;ko04726//Serotonergic synapse;ko04724//Glutamatergic synapse;ko04725//Cholinergic synapse;ko04728//Dopaminergic synapse;ko043…	K04536;K04536;K04536;K04536;K04536;K04536;K04536;K04536;K04536;K04536;K04536;K04536;K04536;K04536;K04536;K04536;K04536;K04536;K04536	-	-	-
4	ncbi_113820488	ncbi_113820488	2.236397986	1.505629264	0.570810377	3.92E-50	1.05E-45	--	PREDICTED: keratin, type I cytoskeletal 9-like [Hyalella azteca]	-	-	-	-	-	-	-
4	ncbi_113826021	ncbi_113826021	2.458194788	1.524106422	0.689635596	4.70E-50	1.26E-45	--	-	-	-	-	-	-	-	-
4	ncbi_113806998	ncbi_113806998	1.691049376	1.280372146	0.401355588	8.67E-50	2.32E-45	--	PREDICTED: alpha-2-macroglobulin receptor-associated protein-like [Hyalella azteca]	-	-	-	-	-	-	-
4	ncbi_113816333	Dnajc1	0.570313773	0.425431642	0.422828534	1.63E-49	4.38E-45	Dnajc1	PREDICTED: dnaJ homolog subfamily C member 1-like [Pogonomyrmex barbatus]	Genetic Information Processing	Folding, sorting and degradation	ko04141//Protein processing in endoplasmic reticulum	K09521	-	-	-
4	ncbi_113816300	NDFIP2	1.260851843	0.974944173	0.371007247	1.71E-49	4.57E-45	NDFIP2	PREDICTED: NEDD4 family-interacting protein 1-like [Hyalella azteca]	-	-	-	-	-	-	-
4	ncbi_113826878	ncbi_113826878	1.209231009	0.878212399	0.461448072	3.50E-49	9.37E-45	--	PREDICTED: kinectin isoform X1 [Microplitis demolitor]	-	-	-	-	-	-	-
4	ncbi_113804062	CANX	2.494481719	1.781956861	0.485277685	5.95E-49	1.59E-44	CANX	calnexin [Penaeus monodon]	Genetic Information Processing;Cellular Processes;Human Diseases;Organismal Systems;Organismal Systems	Folding, sorting and degradation;Transport and catabolism;Infectious diseases;Endocrine system;Immune system	ko04141//Protein processing in endoplasmic reticulum;ko04145//Phagosome;ko05166//HTLV-I infection;ko04918//Thyroid hormone synthesis;ko04612//Antigen processing and presentation	K08054;K08054;K08054;K08054;K08054	-	-	-
4	ncbi_113822739	KDM5A	1.039409282	0.777672057	0.418530041	8.85E-49	2.37E-44	KDM5A	PREDICTED: lysine-specific demethylase lid isoform X1 [Ceratina calcarata]	-	-	-	-	-	-	-
4	ncbi_113813302	Fib	2.019583754	0.564596084	1.838766949	2.35E-48	6.29E-44	Fib	PREDICTED: rRNA 2'-O-methyltransferase fibrillarin [Drosophila eugracilis]	Genetic Information Processing	Translation	ko03008//Ribosome biogenesis in eukaryotes	K14563	GO:0016604//nuclear body;GO:0030529//intracellular ribonucleoprotein complex;GO:0044452//nucleolar part	GO:0003676//nucleic acid binding;GO:0016741//transferase activity, transferring one-carbon groups	GO:0006399//tRNA metabolic process;GO:0010467//gene expression;GO:0016072//rRNA metabolic process;GO:0031023//microtubule organizing center organization;GO:0033554//cellular response to stress
4	ncbi_113821240	ncbi_113821240	1.416941126	0.361404495	1.971093461	8.97E-48	2.40E-43	--	-	-	-	-	-	-	-	-
4	ncbi_113805733	ncbi_113805733	31.77632505	21.47100996	0.565562231	1.32E-47	3.54E-43	--	-	-	-	-	-	-	-	-
4	ncbi_113829565	DHCR24	0.970443695	0.754510065	0.363104366	1.87E-47	5.00E-43	DHCR24	Delta(24)-sterol reductase [Daphnia magna]	Metabolism;Metabolism	Global and overview maps;Lipid metabolism	ko01100//Metabolic pathways;ko00100//Steroid biosynthesis	K09828;K09828	-	GO:0016614//oxidoreductase activity, acting on CH-OH group of donors	-
4	ncbi_113821004	TLN2	1.832181707	1.232478387	0.572000243	6.35E-47	1.70E-42	TLN2	PREDICTED: talin-2-like isoform X2 [Hyalella azteca]	Cellular Processes;Environmental Information Processing;Organismal Systems;Human Diseases	Cellular community - eukaryotes;Signal transduction;Immune system;Infectious diseases	ko04510//Focal adhesion;ko04015//Rap1 signaling pathway;ko04611//Platelet activation;ko05166//HTLV-I infection	K06271;K06271;K06271;K06271	GO:0005924//cell-substrate adherens junction;GO:0043232//intracellular non-membrane-bounded organelle	GO:0003779//actin binding;GO:0005102//receptor binding;GO:0005198//structural molecule activity	GO:0007010//cytoskeleton organization;GO:0022610//biological adhesion
4	ncbi_113805147	Ythdc1	1.40877015	0.944847944	0.576282168	7.11E-47	1.91E-42	Ythdc1	PREDICTED: YTH domain-containing protein 1-like [Hyalella azteca]	-	-	-	-	-	-	-
4	ncbi_113821688	mats	0.713987497	0.554416181	0.364929447	3.94E-46	1.06E-41	mats	PREDICTED: MOB kinase activator-like 1 [Ceratina calcarata]	Environmental Information Processing;Environmental Information Processing;Environmental Information Processing	Signal transduction;Signal transduction;Signal transduction	ko04390//Hippo signaling pathway;ko04391//Hippo signaling pathway -fly;ko04392//Hippo signaling pathway - multiple species	K06685;K06685;K06685	-	-	-
4	ncbi_113820211	HDLBP	0.87141959	0.635852779	0.454674776	4.80E-46	1.28E-41	HDLBP	Vigilin [Zootermopsis nevadensis]	-	-	-	-	-	-	-
4	ncbi_113823725	ncbi_113823725	1.140841404	0.814201529	0.486640411	4.29E-44	1.15E-39	--	PREDICTED: epsin-2 isoform X1 [Colius striatus]	Cellular Processes	Transport and catabolism	ko04144//Endocytosis	K12471	-	-	-
4	ncbi_113817497	Cir1	1.04222816	0.808166935	0.366945909	8.91E-44	2.38E-39	Cir1	PREDICTED: corepressor interacting with RBPJ 1 [Microplitis demolitor]	Environmental Information Processing	Signal transduction	ko04330//Notch signaling pathway	K06066	-	-	-
4	ncbi_113802760	Rsl24d1	5.267267446	2.420970971	1.121468934	1.60E-43	4.29E-39	Rsl24d1	PREDICTED: probable ribosome biogenesis protein RLP24 [Bemisia tabaci]	Genetic Information Processing	Translation	ko03010//Ribosome	K02896	-	-	-
4	ncbi_113817779	PPP1R2	1.075191171	0.792765769	0.439626623	6.67E-43	1.79E-38	PPP1R2	Protein phosphatase inhibitor 2 [Zootermopsis nevadensis]	-	-	-	-	-	-	-
4	ncbi_113809608	ncbi_113809608	0.854504195	0.617375715	0.468938841	1.18E-42	3.15E-38	--	PREDICTED: mucin-17-like [Hyalella azteca]	-	-	-	-	-	-	-
4	ncbi_113815035	ITA	1.676238323	1.297465774	0.369530801	1.59E-42	4.25E-38	ITA	inhibitor of apoptosis protein [Litopenaeus vannamei]	Human Diseases;Cellular Processes;Cellular Processes;Environmental Information Processing;Genetic Information Processing;Human Diseases;Cellular Processes;Human Diseases;Human Diseases;Organismal Systems;Human Diseases;Environmental Information Processing;Cellular Processes;Organismal Systems;Environmental Information Processing	Cancers;Cellular community - eukaryotes;Cell growth and death;Signal transduction;Folding, sorting and degradation;Cancers;Cell growth and death;Drug resistance;Infectious diseases;Immune system;Cancers;Signal transduction;Cell growth and death;Immune system;Signal transduction	ko05200//Pathways in cancer;ko04510//Focal adhesion;ko04210//Apoptosis;ko04390//Hippo signaling pathway;ko04120//Ubiquitin mediated proteolysis;ko05202//Transcriptional misregulation in cancers;ko04217//Necroptosis;ko01524//Platinum drug resistance;ko05145//Toxoplasmosis;ko04621//NOD-like receptor signaling pathway;ko05222//Small cell lung cancer;ko04668//TNF signaling pathway;ko04215//Apoptosis …	K16060;K16060;K16060;K16060;K16060;K16060;K16060;K16060;K16060;K16060;K16060;K16060;K16060;K16060;K16060	-	-	-
4	ncbi_113818991	chn	1.32576965	0.938894729	0.497794818	1.98E-41	5.30E-37	chn	PREDICTED: zinc finger protein 628-like [Hyalella azteca]	-	-	-	-	-	-	-
4	ncbi_113828726	Kr-h2	1.780256592	1.350543527	0.398545057	2.13E-41	5.71E-37	Kr-h2	Protein Kr-h2 [Zootermopsis nevadensis]	-	-	-	-	-	-	-
4	ncbi_113822473	ncbi_113822473	2.538578899	0.76940283	1.722210058	2.52E-41	6.75E-37	--	-	-	-	-	-	-	-	-
4	ncbi_113822332	ncbi_113822332	2.162181183	0.661349772	1.709002036	2.63E-41	7.04E-37	--	-	-	-	-	-	-	-	-
4	ncbi_113817454	Gprk2	2.359140145	1.683004753	0.487221873	6.39E-41	1.71E-36	Gprk2	PREDICTED: G protein-coupled receptor kinase 2 [Dufourea novaeangliae]	Cellular Processes;Organismal Systems;Human Diseases;Environmental Information Processing	Transport and catabolism;Immune system;Substance dependence;Signal transduction	ko04144//Endocytosis;ko04062//Chemokine signaling pathway;ko05032//Morphine addiction;ko04341//Hedgehog signaling pathway - fly	K08291;K08291;K08291;K08291	-	GO:0004674//protein serine/threonine kinase activity;GO:0032550//purine ribonucleoside binding	GO:0006464//cellular protein modification process;GO:0006796//phosphate-containing compound metabolic process;GO:0045744//negative regulation of G-protein coupled receptor protein signaling pathway
4	ncbi_113807572	CCNT1	0.940256375	0.663171321	0.503672565	2.46E-40	6.58E-36	CCNT1	cyclin T [Penaeus monodon]	Human Diseases	Cancers	ko05202//Transcriptional misregulation in cancers	K15188	-	-	-
4	ncbi_113802528	Retsat	0.804195848	0.566362264	0.505821744	2.67E-40	7.16E-36	Retsat	PREDICTED: all-trans-retinol 13,14-reductase [Sinocyclocheilus grahami]	Metabolism	Metabolism of cofactors and vitamins	ko00830//Retinol metabolism	K09516	-	-	-
4	ncbi_113823266	MICALL2	1.375358306	0.942537997	0.545184831	3.93E-40	1.05E-35	MICALL2	PREDICTED: MICAL-like protein 1 [Tribolium castaneum]	-	-	-	-	-	-	-
4	ncbi_113813910	ncbi_113813910	3.777444104	1.287250635	1.553117426	4.19E-40	1.12E-35	--	-	-	-	-	-	-	-	-
4	ncbi_113827590	tric-1B.1	0.868045878	0.666438966	0.381298538	1.33E-39	3.56E-35	tric-1B.1	PREDICTED: trimeric intracellular cation channel type B-like [Hyalella azteca]	-	-	-	-	-	-	-
4	ncbi_113828236	Csnk1g3	0.782947566	0.502698516	0.639222262	1.38E-39	3.71E-35	Csnk1g3	PREDICTED: casein kinase I-like isoform X2 [Hyalella azteca]	Environmental Information Processing;Environmental Information Processing	Signal transduction;Signal transduction	ko04340//Hedgehog signaling pathway;ko04341//Hedgehog signaling pathway - fly	K08958;K08958	-	-	-
4	ncbi_113822287	Luc7l3	0.702792068	0.540207534	0.379584148	1.67E-39	4.48E-35	Luc7l3	PREDICTED: luc7-like protein 3 isoform X2 [Hyalella azteca]	-	-	-	-	-	-	-
4	ncbi_113817801	RPN2	1.341332559	0.977320911	0.456762706	1.80E-39	4.83E-35	RPN2	PREDICTED: dolichyl-diphosphooligosaccharide--protein glycosyltransferase subunit 2-like isoform X2 [Hyalella azteca]	Metabolism;Genetic Information Processing;Metabolism	Global and overview maps;Folding, sorting and degradation;Glycan biosynthesis and metabolism	ko01100//Metabolic pathways;ko04141//Protein processing in endoplasmic reticulum;ko00510//N-Glycan biosynthesis	K12667;K12667;K12667	-	-	-
4	ncbi_113826980	ncbi_113826980	0.772321222	0.573556238	0.429266063	5.11E-39	1.37E-34	--	-	-	-	-	-	-	-	-
4	ncbi_113821533	PTPRA	1.377585566	0.780827291	0.819066548	7.94E-39	2.13E-34	PTPRA	PREDICTED: receptor-type tyrosine-protein phosphatase alpha-like [Hyalella azteca]	-	-	-	-	-	-	-
4	ncbi_113806326	ncbi_113806326	1.669759059	1.18195102	0.49846969	2.28E-38	6.10E-34	--	-	-	-	-	-	-	-	-
4	ncbi_113806912	Baz1a	0.736831331	0.556334886	0.405380832	4.33E-38	1.16E-33	Baz1a	PREDICTED: bromodomain adjacent to zinc finger domain protein 1A-like [Hyalella azteca]	-	-	-	-	GO:0031010//ISWI-type complex	GO:0046872//metal ion binding;GO:0090595//acetyl-CoA:L-lysine N6-acetyltransferase	GO:0006260//DNA replication;GO:0010468//regulation of gene expression;GO:0016568//chromatin modification
4	ncbi_113809416	ncbi_113809416	6.510494906	3.413758312	0.931406295	1.10E-37	2.96E-33	--	PREDICTED: cellular nucleic acid-binding protein-like isoform X1 [Limulus polyphemus]	-	-	-	-	-	-	-
4	ncbi_113807347	pat-4	1.354947231	0.929291547	0.544033477	1.54E-37	4.13E-33	pat-4	PREDICTED: integrin-linked protein kinase homolog pat-4-like [Hyalella azteca]	Cellular Processes;Human Diseases;Organismal Systems;Organismal Systems;Human Diseases	Cellular community - eukaryotes;Infectious diseases;Development;Endocrine system;Cancers	ko04510//Focal adhesion;ko05100//Bacterial invasion of epithelial cells;ko04360//Axon guidance;ko03320//PPAR signaling pathway;ko05213//Endometrial cancer	K06272;K06272;K06272;K06272;K06272	-	GO:0004713//protein tyrosine kinase activity;GO:0032550//purine ribonucleoside binding	GO:0006468//protein phosphorylation;GO:0007166//cell surface receptor signaling pathway;GO:0010646//regulation of cell communication
4	ncbi_113823695	ncbi_113823695	1.841244992	0.996678594	0.885481352	3.01E-37	8.05E-33	--	hypothetical protein BRAFLDRAFT_69362 [Branchiostoma floridae]	-	-	-	-	-	-	-
4	ncbi_113818648	ncbi_113818648	1.034823401	0.76116228	0.443108609	3.10E-37	8.30E-33	--	G protein-coupled receptor [Procambarus clarkii]	-	-	-	-	-	-	-
4	ncbi_113805515	Stim	0.616577994	0.473111946	0.382101809	4.37E-37	1.17E-32	Stim	PREDICTED: stromal interaction molecule homolog [Dinoponera quadriceps]	Organismal Systems;Environmental Information Processing	Immune system;Signal transduction	ko04611//Platelet activation;ko04020//Calcium signaling pathway	K16059;K16059	-	-	-
4	ncbi_113801963	NCBP3	1.338508489	0.950146141	0.494404953	4.76E-37	1.28E-32	NCBP3	PREDICTED: nuclear cap-binding protein subunit 3-like [Neodiprion lecontei]	-	-	-	-	-	-	-
4	ncbi_113803567	SYNE1	3.219069357	1.983520017	0.698580705	4.88E-37	1.31E-32	SYNE1	PREDICTED: titin-like [Nicrophorus vespilloides]	-	-	-	-	-	-	-
4	ncbi_113800348	MRAS	0.726480629	0.520942536	0.479800089	5.67E-37	1.52E-32	MRAS	RAS-like protein, partial [Procambarus clarkii]	Human Diseases;Cellular Processes;Environmental Information Processing;Human Diseases;Environmental Information Processing;Environmental Information Processing;Cellular Processes;Cellular Processes;Environmental Information Processing;Environmental Information Processing;Organismal Systems;Cellular Processes	Cancers;Cell motility;Signal transduction;Infectious diseases;Signal transduction;Signal transduction;Transport and catabolism;Cell growth and death;Signal transduction;Signal transduction;Immune system;Transport and catabolism	ko05205//Proteoglycans in cancer;ko04810//Regulation of actin cytoskeleton;ko04015//Rap1 signaling pathway;ko05166//HTLV-I infection;ko04010//MAPK signaling pathway;ko04014//Ras signaling pathway;ko04140//Autophagy - animal;ko04218//Cellular senescence;ko04072//Phospholipase D signaling pathway;ko04371//Apelin signaling pathway;ko04625//C-type lectin receptor signaling pathway;ko04137//Mitophagy …	K07831;K07831;K07831;K07831;K07831;K07831;K07831;K07831;K07831;K07831;K07831;K07831	GO:0044464//cell part	GO:0032550//purine ribonucleoside binding	GO:0008104//protein localization;GO:0035556//intracellular signal transduction
4	ncbi_113825438	EIF4G2	0.741932267	0.561240495	0.402668379	6.55E-37	1.75E-32	EIF4G2	Eukaryotic translation initiation factor 4 gamma [Daphnia magna]	Genetic Information Processing;Human Diseases	Translation;Cardiovascular diseases	ko03013//RNA transport;ko05416//Viral myocarditis	K03260;K03260	-	-	-
4	ncbi_113826960	Psmd3	1.937672004	1.503031024	0.366449594	1.02E-36	2.72E-32	Psmd3	PREDICTED: probable 26S proteasome non-ATPase regulatory subunit 3 [Hyalella azteca]	Human Diseases;Genetic Information Processing	Infectious diseases;Folding, sorting and degradation	ko05169//Epstein-Barr virus infection;ko03050//Proteasome	K03033;K03033	-	-	GO:0009894//regulation of catabolic process
4	ncbi_113819145	TMEM59	1.179476415	0.85389625	0.466013875	1.04E-36	2.78E-32	TMEM59	PREDICTED: transmembrane protein 59-like [Branchiostoma belcheri]	-	-	-	-	-	-	-
4	ncbi_113804451	Dync1li2	0.974856414	0.69919656	0.479491655	1.21E-36	3.24E-32	Dync1li2	Cytoplasmic dynein 1 light intermediate chain 2 [Zootermopsis nevadensis]	Cellular Processes;Human Diseases;Organismal Systems	Transport and catabolism;Infectious diseases;Excretory system	ko04145//Phagosome;ko05132//Salmonella infection;ko04962//Vasopressin-regulated water reabsorption	K10416;K10416;K10416	-	-	-
4	ncbi_113815566	ZMPSTE24	1.60609205	1.212268028	0.405845872	1.29E-36	3.46E-32	ZMPSTE24	PREDICTED: CAAX prenyl protease 1 homolog [Hyalella azteca]	Metabolism	Metabolism of terpenoids and polyketides	ko00900//Terpenoid backbone biosynthesis	K06013	-	-	GO:0006508//proteolysis;GO:0044267//cellular protein metabolic process
4	ncbi_113821163	loco	0.643241548	0.47393709	0.440665025	1.50E-36	4.01E-32	loco	PREDICTED: regulator of G-protein signaling loco-like [Limulus polyphemus]	-	-	-	-	-	-	GO:0050789//regulation of biological process
4	ncbi_113805319	TTC31	1.32472804	0.852433726	0.636036634	1.61E-36	4.32E-32	TTC31	PREDICTED: hsp70-Hsp90 organizing protein 1 isoform X2 [Crassostrea gigas]	-	-	-	-	-	-	-
4	ncbi_113826740	Cltc	1.148068462	0.735780007	0.641862297	1.72E-36	4.60E-32	Cltc	clathrin [Marsupenaeus japonicus]	Cellular Processes;Human Diseases;Cellular Processes;Human Diseases;Organismal Systems;Organismal Systems	Transport and catabolism;Neurodegenerative diseases;Transport and catabolism;Infectious diseases;Nervous system;Excretory system	ko04142//Lysosome;ko05016//Huntington disease;ko04144//Endocytosis;ko05100//Bacterial invasion of epithelial cells;ko04721//Synaptic vesicle cycle;ko04961//Endocrine and other factor-regulated calcium reabsorption	K04646;K04646;K04646;K04646;K04646;K04646	GO:0030125//clathrin vesicle coat	-	GO:0015031//protein transport
4	ncbi_113830033	ncbi_113830033	0.940152714	0.646825489	0.539518588	3.48E-36	9.32E-32	--	-	-	-	-	-	-	-	-
4	ncbi_113803548	ken	0.752949578	0.545936125	0.463821092	5.74E-36	1.54E-31	ken	PREDICTED: transcription factor che-1-like [Bemisia tabaci]	Environmental Information Processing	Signal transduction	ko04013//MAPK signaling pathway - fly	K20210	-	-	-
4	ncbi_113829491	PTEN	0.896729484	0.613942012	0.546570437	6.40E-36	1.71E-31	PTEN	PREDICTED: phosphatidylinositol 3,4,5-trisphosphate 3-phosphatase and dual-specificity protein phosphatase PTEN isoform X3 [Apis cerana]	Metabolism;Human Diseases;Human Diseases;Cellular Processes;Environmental Information Processing;Human Diseases;Environmental Information Processing;Human Diseases;Cellular Processes;Environmental Information Processing;Human Diseases;Environmental Information Processing;Cellular Processes;Organismal Systems;Metabolism;Human Diseases;Human Diseases;Human Diseases;Environmental Information Process…	Global and overview maps;Cancers;Infectious diseases;Cellular community - eukaryotes;Signal transduction;Cancers;Signal transduction;Cancers;Transport and catabolism;Signal transduction;Cancers;Signal transduction;Cell growth and death;Aging;Carbohydrate metabolism;Cancers;Endocrine and metabolic diseases;Cancers;Signal transduction;Infectious diseases;Cancers;Drug resistance;Cancers;Cancers;Cell…	ko01100//Metabolic pathways;ko05200//Pathways in cancer;ko05165//Human papillomavirus infection;ko04510//Focal adhesion;ko04151//PI3K-Akt signaling pathway;ko05225//Hepatocellular carcinoma;ko04150//mTOR signaling pathway;ko05206//MicroRNAs in cancer;ko04140//Autophagy - animal;ko04071//Sphingolipid signaling pathway;ko05224//Breast cancer;ko04068//FoxO signaling pathway;ko04218//Cellular senesce…	K01110;K01110;K01110;K01110;K01110;K01110;K01110;K01110;K01110;K01110;K01110;K01110;K01110;K01110;K01110;K01110;K01110;K01110;K01110;K01110;K01110;K01110;K01110;K01110;K01110;K01110	-	-	GO:0016311//dephosphorylation
4	ncbi_113829954	STT3A	1.357222619	0.824175712	0.719633524	6.72E-36	1.80E-31	STT3A	PREDICTED: dolichyl-diphosphooligosaccharide--protein glycosyltransferase subunit STT3A-like [Hyalella azteca]	Metabolism;Genetic Information Processing;Metabolism	Global and overview maps;Folding, sorting and degradation;Glycan biosynthesis and metabolism	ko01100//Metabolic pathways;ko04141//Protein processing in endoplasmic reticulum;ko00510//N-Glycan biosynthesis	K07151;K07151;K07151	GO:0044425//membrane part	GO:0004576//oligosaccharyl transferase activity	GO:0006487//protein N-linked glycosylation
4	ncbi_113818262	Cdk12	2.195637237	1.423882884	0.624809224	7.36E-36	1.97E-31	Cdk12	PREDICTED: cyclin-dependent kinase 12 isoform X2 [Linepithema humile]	-	-	-	-	-	-	-
4	ncbi_113809524	Rbm34	2.68358787	0.842333867	1.671699051	7.72E-36	2.07E-31	Rbm34	PREDICTED: RNA-binding protein 34-like isoform X6 [Lingula anatina]	-	-	-	-	-	-	-
4	ncbi_113822189	Pym	0.653974419	0.491465654	0.412143604	1.08E-35	2.90E-31	Pym	PREDICTED: partner of Y14 and mago-like [Parasteatoda tepidariorum]	Genetic Information Processing;Genetic Information Processing	Translation;Translation	ko03013//RNA transport;ko03015//mRNA surveillance pathway	K14294;K14294	-	-	-
4	ncbi_113816020	Adat3	0.694168083	0.488758936	0.506161952	1.53E-35	4.11E-31	Adat3	PREDICTED: probable inactive tRNA-specific adenosine deaminase-like protein 3 isoform X2 [Branchiostoma belcheri]	-	-	-	-	-	-	-
4	ncbi_113814237	ncbi_113814237	14.52311149	11.23047085	0.37093216	1.67E-35	4.48E-31	--	PREDICTED: neurogenic locus notch homolog protein 1-like [Hyalella azteca]	-	-	-	-	-	-	-
4	ncbi_113825931	Rbm25	1.369449204	0.918180958	0.576745337	1.73E-35	4.63E-31	Rbm25	PREDICTED: RNA-binding protein 25-like isoform X2 [Halyomorpha halys]	Genetic Information Processing	Transcription	ko03040//Spliceosome	K12822	GO:0016604//nuclear body	GO:0003723//RNA binding	GO:0006915//apoptotic process;GO:0048024//regulation of mRNA splicing, via spliceosome
4	ncbi_113824931	Ccar1	1.021408861	0.672440364	0.603082248	2.26E-35	6.05E-31	Ccar1	PREDICTED: cell division cycle and apoptosis regulator protein 1-like isoform X1 [Solenopsis invicta]	-	-	-	-	-	-	-
4	ncbi_113804503	Szrd1	0.86342894	0.597456201	0.531244495	2.32E-35	6.21E-31	Szrd1	PREDICTED: SUZ domain-containing protein 1 isoform X1 [Cimex lectularius]	-	-	-	-	-	-	-
4	ncbi_113826962	CCT5	7.697908914	4.834673505	0.671048136	2.45E-35	6.56E-31	CCT5	Cct5-prov protein [Daphnia magna]	-	-	-	-	GO:0005815//microtubule organizing center;GO:0031988//membrane-bounded vesicle;GO:0043234//protein complex	GO:0005515//protein binding;GO:0032550//purine ribonucleoside binding	GO:0006810//transport;GO:0035036//sperm-egg recognition;GO:0044267//cellular protein metabolic process;GO:0044707//single-multicellular organism process;GO:0051707//response to other organism
4	ncbi_113824673	Erp44	0.726298886	0.527692297	0.460866444	3.69E-35	9.88E-31	Erp44	Endoplasmic reticulum resident protein 44 [Daphnia magna]	-	-	-	-	-	-	-
4	ncbi_113812187	ncbi_113812187	1.154682042	0.891118623	0.373806243	4.43E-35	1.19E-30	--	-	-	-	-	-	-	-	-
4	ncbi_113821413	PSMD2	0.697549073	0.525104753	0.409689462	5.33E-35	1.43E-30	PSMD2	PREDICTED: 26S proteasome non-ATPase regulatory subunit 2-like [Hyalella azteca]	Human Diseases;Genetic Information Processing	Infectious diseases;Folding, sorting and degradation	ko05169//Epstein-Barr virus infection;ko03050//Proteasome	K03028;K03028	-	-	-
4	ncbi_113808376	NIPBL	1.631721392	1.037697055	0.653009421	1.15E-34	3.08E-30	NIPBL	PREDICTED: nipped-B-like protein A [Hyalella azteca]	-	-	-	-	-	-	-
4	ncbi_113805532	PDIA3	3.966135829	3.075112025	0.367095118	1.41E-34	3.78E-30	PDIA3	endoplasmic reticulum protein 57 [Penaeus monodon]	Genetic Information Processing;Human Diseases;Organismal Systems	Folding, sorting and degradation;Infectious diseases;Immune system	ko04141//Protein processing in endoplasmic reticulum;ko05163//Human cytomegalovirus infection;ko04612//Antigen processing and presentation	K08056;K08056;K08056	-	GO:0016740//transferase activity	GO:0008152//metabolic process;GO:0009987//cellular process
4	ncbi_113802078	REXO1L1	0.850544626	0.643289989	0.402917697	1.50E-34	4.02E-30	REXO1L1	PREDICTED: RNA exonuclease 3 isoform X2 [Vollenhovia emeryi]	Genetic Information Processing	Translation	ko03008//Ribosome biogenesis in eukaryotes	K14570	-	-	-
4	ncbi_113821743	Pa2g4	6.779685006	3.789762822	0.839110683	1.63E-34	4.37E-30	Pa2g4	PREDICTED: proliferation-associated protein 2G4 isoform X2 [Cimex lectularius]	-	-	-	-	-	-	-
4	ncbi_113812678	ncbi_113812678	0.909841207	0.551921002	0.721152993	1.92E-34	5.15E-30	--	PREDICTED: protein muscleblind isoform X6 [Nasonia vitripennis]	-	-	-	-	GO:0031672//A band;GO:0031674//I band;GO:0043231//intracellular membrane-bounded organelle	GO:0003676//nucleic acid binding	GO:0012501//programmed cell death;GO:0019725//cellular homeostasis;GO:0035114//imaginal disc-derived appendage morphogenesis;GO:0042051//compound eye photoreceptor development;GO:0048024//regulation of mRNA splicing, via spliceosome;GO:0060180//female mating behavior;GO:0061061//muscle structure development
4	ncbi_113803266	NOP56	2.008941485	0.701112443	1.518717798	2.09E-34	5.60E-30	NOP56	Nucleolar kke/d repeat protein [Daphnia magna]	Genetic Information Processing	Translation	ko03008//Ribosome biogenesis in eukaryotes	K14564	-	-	-
4	ncbi_113823401	ncbi_113823401	1.105418194	0.617342198	0.840449948	2.17E-34	5.80E-30	--	PREDICTED: tropomyosin, smooth muscle/fibroblast CTM1-like [Aedes albopictus]	-	-	-	-	-	-	-
4	ncbi_113813084	Lam	1.042571745	0.724378597	0.525330843	2.59E-34	6.93E-30	Lam	PREDICTED: lamin Dm0 isoform X2 [Cerapachys biroi]	Cellular Processes;Cellular Processes	Cell growth and death;Cell growth and death	ko04210//Apoptosis;ko04214//Apoptosis - fly	K07611;K07611	-	-	-
4	ncbi_113826345	GluProRS	0.897459771	0.698250598	0.362102367	5.49E-34	1.47E-29	GluProRS	PREDICTED: bifunctional glutamate/proline--tRNA ligase-like [Hyalella azteca]	Metabolism;Metabolism;Genetic Information Processing	Global and overview maps;Metabolism of cofactors and vitamins;Translation	ko01100//Metabolic pathways;ko00860//Porphyrin and chlorophyll metabolism;ko00970//Aminoacyl-tRNA biosynthesis	K14163;K14163;K14163	-	GO:0004812//aminoacyl-tRNA ligase activity	GO:0006418//tRNA aminoacylation for protein translation
4	ncbi_113803340	MKL2	0.901067124	0.598272139	0.590832702	6.06E-34	1.62E-29	MKL2	PREDICTED: MKL/myocardin-like protein 1 isoform X3 [Polistes canadensis]	-	-	-	-	-	-	-
4	ncbi_113829111	PSMD12	0.774763259	0.557377981	0.475099528	1.88E-33	5.04E-29	PSMD12	26S proteamsome non-ATPase subunit 12 [Eriocheir sinensis]	Human Diseases;Genetic Information Processing	Infectious diseases;Folding, sorting and degradation	ko05169//Epstein-Barr virus infection;ko03050//Proteasome	K03035;K03035	GO:0022624//proteasome accessory complex;GO:0031988//membrane-bounded vesicle	-	-
4	ncbi_113800533	CtBP	1.753138156	1.152892554	0.604681628	2.91E-33	7.80E-29	CtBP	C-terminal-binding protein [Litopenaeus vannamei]	Human Diseases;Environmental Information Processing;Human Diseases;Environmental Information Processing	Cancers;Signal transduction;Cancers;Signal transduction	ko05200//Pathways in cancer;ko04310//Wnt signaling pathway;ko05220//Chronic myeloid leukemia;ko04330//Notch signaling pathway	K04496;K04496;K04496;K04496	-	GO:0000166//nucleotide binding;GO:0016614//oxidoreductase activity, acting on CH-OH group of donors	GO:0044710//single-organism metabolic process
4	ncbi_113824421	Galphao	3.119675523	2.394583346	0.381621332	9.94E-33	2.66E-28	Galphao	GTP binding protein alpha subunit Go [Marsupenaeus japonicus]	Environmental Information Processing;Organismal Systems;Human Diseases;Organismal Systems;Organismal Systems;Human Diseases;Human Diseases;Organismal Systems;Organismal Systems;Organismal Systems;Organismal Systems;Organismal Systems;Organismal Systems;Organismal Systems;Organismal Systems;Human Diseases;Organismal Systems;Human Diseases	Signal transduction;Endocrine system;Substance dependence;Nervous system;Endocrine system;Infectious diseases;Infectious diseases;Nervous system;Nervous system;Nervous system;Nervous system;Endocrine system;Endocrine system;Nervous system;Environmental adaptation;Substance dependence;Nervous system;Infectious diseases	ko04015//Rap1 signaling pathway;ko04921//Oxytocin signaling pathway;ko05034//Alcoholism;ko04723//Retrograde endocannabinoid signaling;ko04926//Relaxin signaling pathway;ko05163//Human cytomegalovirus infection;ko05145//Toxoplasmosis;ko04726//Serotonergic synapse;ko04724//Glutamatergic synapse;ko04725//Cholinergic synapse;ko04728//Dopaminergic synapse;ko04915//Estrogen signaling pathway;ko04916//M…	K04534;K04534;K04534;K04534;K04534;K04534;K04534;K04534;K04534;K04534;K04534;K04534;K04534;K04534;K04534;K04534;K04534;K04534	-	GO:0017076//purine nucleotide binding;GO:0017111//nucleoside-triphosphatase activity;GO:0032403//protein complex binding;GO:0032550//purine ribonucleoside binding;GO:0043169//cation binding;GO:0060089//molecular transducer activity	GO:0007187//G-protein coupled receptor signaling pathway, coupled to cyclic nucleotide second messenger
4	ncbi_113805977	DNAJA1	1.247301403	0.971544479	0.360458175	1.97E-32	5.26E-28	DNAJA1	heat shock protein 40 [Marsupenaeus japonicus]	Genetic Information Processing	Folding, sorting and degradation	ko04141//Protein processing in endoplasmic reticulum	K09502	GO:0031988//membrane-bounded vesicle;GO:0044444//cytoplasmic part	GO:0031072//heat shock protein binding;GO:0032550//purine ribonucleoside binding;GO:0043169//cation binding;GO:0044389//ubiquitin-like protein ligase binding;GO:0070325//lipoprotein particle receptor binding	GO:0006950//response to stress;GO:0015031//protein transport;GO:0030518//intracellular steroid hormone receptor signaling pathway;GO:0031396//regulation of protein ubiquitination;GO:0033365//protein localization to organelle;GO:0042981//regulation of apoptotic process;GO:0043407//negative regulation of MAP kinase activity;GO:0048232//male gamete generation;GO:0048870//cell motility
4	ncbi_113805683	FEZ2	1.029668216	0.744055738	0.468696936	2.20E-32	5.88E-28	FEZ2	PREDICTED: fasciculation and elongation protein zeta-2-like [Hyalella azteca]	-	-	-	-	-	-	-
4	ncbi_113814743	DDX17	3.793503461	1.426795769	1.410752011	4.77E-32	1.28E-27	DDX17	DEAD(Asp-Glu-Ala-Asp) box polypeptide 5 [Macrobrachium nipponense]	-	-	-	-	-	-	-
4	ncbi_113826493	RPL6	21.84885884	16.68470087	0.389032108	6.41E-32	1.72E-27	RPL6	PREDICTED: 60S ribosomal protein L6-like [Limulus polyphemus]	Genetic Information Processing	Translation	ko03010//Ribosome	K02934	-	-	-
4	ncbi_113810148	RPLP2	9.492117935	6.812791462	0.478483978	1.96E-31	5.26E-27	RPLP2	60S acidic ribosomal protein P2-like protein [Scylla paramamosain]	Genetic Information Processing	Translation	ko03010//Ribosome	K02943	GO:0005840//ribosome	-	GO:0010467//gene expression;GO:0034645//cellular macromolecule biosynthetic process
4	ncbi_113813724	Galphaq	0.880240753	0.576573309	0.610394115	2.26E-31	6.05E-27	Galphaq	Guanine nucleotide-binding protein G(q) subunit alpha [Cerapachys biroi]	Human Diseases;Human Diseases;Environmental Information Processing;Organismal Systems;Organismal Systems;Organismal Systems;Organismal Systems;Human Diseases;Environmental Information Processing;Organismal Systems;Human Diseases;Organismal Systems;Environmental Information Processing;Environmental Information Processing;Organismal Systems;Human Diseases;Organismal Systems;Organismal Systems;Human…	Cancers;Neurodegenerative diseases;Signal transduction;Sensory system;Immune system;Endocrine system;Digestive system;Neurodegenerative diseases;Signal transduction;Circulatory system;Endocrine and metabolic diseases;Digestive system;Signal transduction;Signal transduction;Nervous system;Infectious diseases;Circulatory system;Nervous system;Infectious diseases;Cellular community - eukaryotes;Nerv…	ko05200//Pathways in cancer;ko05016//Huntington disease;ko04015//Rap1 signaling pathway;ko04745//Phototransduction - fly;ko04611//Platelet activation;ko04921//Oxytocin signaling pathway;ko04972//Pancreatic secretion;ko05010//Alzheimer disease;ko04022//cGMP - PKG signaling pathway;ko04261//Adrenergic signaling in cardiomyocytes;ko04934//Cushing syndrome;ko04971//Gastric acid secretion;ko04071//Sph…	K04634;K04634;K04634;K04634;K04634;K04634;K04634;K04634;K04634;K04634;K04634;K04634;K04634;K04634;K04634;K04634;K04634;K04634;K04634;K04634;K04634;K04634;K04634;K04634;K04634;K04634;K04634;K04634;K04634;K04634;K04634;K04634;K04634;K04634;K04634;K04634;K04634;K04634;K04634;K04634;K04634;K04634	-	GO:0005102//receptor binding;GO:0017076//purine nucleotide binding;GO:0017111//nucleoside-triphosphatase activity;GO:0032403//protein complex binding;GO:0032550//purine ribonucleoside binding;GO:0060089//molecular transducer activity	GO:0007166//cell surface receptor signaling pathway
4	ncbi_113826653	ncbi_113826653	0.858168153	0.602626753	0.509995641	2.66E-31	7.13E-27	--	PREDICTED: nuclear-interacting partner of ALK-like [Lingula anatina]	-	-	-	-	-	-	-
4	ncbi_113808455	Sart1	0.75766487	0.57174567	0.406186323	7.49E-31	2.01E-26	Sart1	PREDICTED: U4/U6.U5 tri-snRNP-associated protein 1-like [Hyalella azteca]	Genetic Information Processing	Transcription	ko03040//Spliceosome	K11984	-	-	-
4	ncbi_113814810	Dpp3	0.584163609	0.44640116	0.388031709	1.01E-30	2.70E-26	Dpp3	PREDICTED: dipeptidyl peptidase 3-like isoform X1 [Hyalella azteca]	-	-	-	-	-	-	-
4	ncbi_113812438	Timm17b	1.436554999	1.113065121	0.368075227	1.70E-30	4.56E-26	Timm17b	PREDICTED: mitochondrial import inner membrane translocase subunit Tim17-B-like [Hyalella azteca]	-	-	-	-	GO:0031224//intrinsic component of membrane	-	-
4	ncbi_113827890	BAZ1A	0.829497687	0.60993376	0.443585388	3.35E-30	8.96E-26	BAZ1A	Bromodomain adjacent to zinc finger domain protein 1A [Orchesella cincta]	-	-	-	-	-	-	-
4	ncbi_113824056	Herpud2	1.888953618	1.243239653	0.603482854	3.87E-30	1.04E-25	Herpud2	PREDICTED: homocysteine-responsive endoplasmic reticulum-resident ubiquitin-like domain member 2 protein isoform X2 [Limulus polyphemus]	Genetic Information Processing	Folding, sorting and degradation	ko04141//Protein processing in endoplasmic reticulum	K14027	-	-	-
4	ncbi_113820837	ARSD	1.670327445	1.183958923	0.496511923	6.93E-30	1.86E-25	ARSD	PREDICTED: arylsulfatase D-like [Hyalella azteca]	-	-	-	-	-	-	-
4	ncbi_113800052	stg	1.981045919	1.462606198	0.43772094	9.01E-30	2.41E-25	stg	PREDICTED: M-phase inducer phosphatase-like, partial [Hyalella azteca]	-	-	-	-	-	-	-
4	ncbi_113820819	Hnrnpl	1.685586596	1.270890339	0.407411197	1.63E-29	4.36E-25	Hnrnpl	PREDICTED: heterogeneous nuclear ribonucleoprotein L-like isoform X2 [Hyalella azteca]	-	-	-	-	-	-	-
4	ncbi_113810575	ncbi_113810575	6.675660865	3.290020015	1.020814304	2.38E-29	6.38E-25	--	protein spaetzle, partial [Cherax quadricarinatus]	Organismal Systems	Immune system	ko04624//Toll and Imd signaling pathway	K20694	-	-	-
4	ncbi_113824151	ACIN1	1.378065722	0.869254507	0.664794147	2.47E-29	6.62E-25	ACIN1	PREDICTED: mucin-5AC-like [Hyalella azteca]	Genetic Information Processing;Genetic Information Processing;Genetic Information Processing	Translation;Transcription;Translation	ko03013//RNA transport;ko03040//Spliceosome;ko03015//mRNA surveillance pathway	K12875;K12875;K12875	-	-	-
4	ncbi_113820948	ncbi_113820948	1.131825779	0.723823202	0.644942643	5.42E-29	1.45E-24	--	-	-	-	-	-	-	-	-
4	ncbi_113818191	ncbi_113818191	1.887607352	0.599761275	1.654098417	5.73E-29	1.53E-24	--	-	-	-	-	-	-	-	-
4	ncbi_113828689	Uba1	0.69567779	0.479553473	0.53672757	6.41E-29	1.72E-24	Uba1	ubiquitin-activating enzyme E1 [Penaeus monodon]	Genetic Information Processing;Human Diseases	Folding, sorting and degradation;Neurodegenerative diseases	ko04120//Ubiquitin mediated proteolysis;ko05012//Parkinson disease	K03178;K03178	-	GO:0016877//ligase activity, forming carbon-sulfur bonds;GO:0032550//purine ribonucleoside binding	GO:0036211//protein modification process
4	ncbi_113812601	Pik3cd	0.653123302	0.472252288	0.467797595	2.09E-28	5.58E-24	Pik3cd	phosphatidylinositol-4,5-bisphosphate 3-kinase catalytic subunit delta isoform [Fenneropenaeus chinensis]	Metabolism;Human Diseases;Human Diseases;Cellular Processes;Human Diseases;Environmental Information Processing;Human Diseases;Cellular Processes;Organismal Systems;Cellular Processes;Environmental Information Processing;Organismal Systems;Human Diseases;Human Diseases;Human Diseases;Human Diseases;Environmental Information Processing;Human Diseases;Human Diseases;Organismal Systems;Environmental…	Global and overview maps;Cancers;Infectious diseases;Cellular community - eukaryotes;Cancers;Signal transduction;Cancers;Cell motility;Endocrine system;Cell growth and death;Signal transduction;Immune system;Cancers;Infectious diseases;Infectious diseases;Cardiovascular diseases;Signal transduction;Cancers;Infectious diseases;Aging;Signal transduction;Cancers;Signal transduction;Infectious diseas…	ko01100//Metabolic pathways;ko05200//Pathways in cancer;ko05165//Human papillomavirus infection;ko04510//Focal adhesion;ko05205//Proteoglycans in cancer;ko04151//PI3K-Akt signaling pathway;ko05225//Hepatocellular carcinoma;ko04810//Regulation of actin cytoskeleton;ko04919//Thyroid hormone signaling pathway;ko04210//Apoptosis;ko04015//Rap1 signaling pathway;ko04611//Platelet activation;ko05231//Ch…	K00922;K00922;K00922;K00922;K00922;K00922;K00922;K00922;K00922;K00922;K00922;K00922;K00922;K00922;K00922;K00922;K00922;K00922;K00922;K00922;K00922;K00922;K00922;K00922;K00922;K00922;K00922;K00922;K00922;K00922;K00922;K00922;K00922;K00922;K00922;K00922;K00922;K00922;K00922;K00922;K00922;K00922;K00922;K00922;K00922;K00922;K00922;K00922;K00922;K00922;K00922;K00922;K00922;K00922;K00922;K00922;K00922;…	-	GO:0016772//transferase activity, transferring phosphorus-containing groups	GO:0009987//cellular process
4	ncbi_113830053	Ankrd11	1.427031311	0.891626461	0.678505652	2.98E-28	7.98E-24	Ankrd11	Ankyrin repeat domain-containing protein 11 [Zootermopsis nevadensis]	-	-	-	-	-	-	-
4	ncbi_113804224	ANGEL2	0.817574167	0.606047628	0.431918434	3.80E-28	1.02E-23	ANGEL2	PREDICTED: protein angel homolog 2 [Anoplophora glabripennis]	-	-	-	-	-	-	-
4	ncbi_113805896	leng8	2.287480562	1.377366548	0.73184694	3.82E-28	1.02E-23	leng8	Leukocyte receptor cluster member 8 like protein [Cyphomyrmex costatus]	-	-	-	-	-	-	-
4	ncbi_113823310	ncbi_113823310	12.41732867	8.944894102	0.473218533	3.98E-28	1.07E-23	--	PREDICTED: immediate early response gene 2 protein-like [Halyomorpha halys]	-	-	-	-	-	-	-
4	ncbi_113823748	CG7483	1.125075912	0.869285191	0.372120875	4.64E-28	1.24E-23	CG7483	PREDICTED: eukaryotic initiation factor 4A-III [Hyalella azteca]	Genetic Information Processing;Genetic Information Processing;Genetic Information Processing	Translation;Transcription;Translation	ko03013//RNA transport;ko03040//Spliceosome;ko03015//mRNA surveillance pathway	K13025;K13025;K13025	-	-	-
4	ncbi_113828950	eif3g	7.193282378	4.763722421	0.594560889	6.46E-28	1.73E-23	eif3g	eukaryotic translation initiation factor 3 subunit G [Penaeus monodon]	Genetic Information Processing	Translation	ko03013//RNA transport	K03248	-	-	-
4	ncbi_113826276	ncbi_113826276	1.47497885	0.984175316	0.583707029	6.66E-28	1.78E-23	--	PREDICTED: protein C9orf72 homolog [Hyalella azteca]	-	-	-	-	-	-	-
4	ncbi_113816725	PITPNA	0.701223734	0.536252901	0.38696128	7.69E-28	2.06E-23	PITPNA	PREDICTED: phosphatidylinositol transfer protein alpha isoform isoform X2 [Dendroctonus ponderosae]	-	-	-	-	-	-	GO:0051234//establishment of localization
4	ncbi_113800161	ncbi_113800161	1.38742311	1.051242666	0.400312085	2.78E-27	7.45E-23	--	PREDICTED: MICOS complex subunit MIC19-like [Hyalella azteca]	-	-	-	-	-	-	-
4	ncbi_113800297	Serbp1	3.074662461	1.227957002	1.324167994	3.06E-27	8.19E-23	Serbp1	PREDICTED: plasminogen activator inhibitor 1 RNA-binding protein-like isoform X2 [Orussus abietinus]	-	-	-	-	-	-	-
4	ncbi_113801883	ncbi_113801883	0.674659656	0.501677968	0.427398312	3.24E-27	8.69E-23	--	-	-	-	-	-	-	-	-
4	ncbi_113818896	PTRH2	1.319436948	0.955823831	0.465105768	3.95E-27	1.06E-22	PTRH2	PREDICTED: peptidyl-tRNA hydrolase 2, mitochondrial-like [Hyalella azteca]	-	-	-	-	GO:0044444//cytoplasmic part	-	GO:0008152//metabolic process;GO:0042981//regulation of apoptotic process;GO:0048519//negative regulation of biological process
4	ncbi_113816887	Dbp80	1.626536012	1.158677772	0.489323356	5.91E-27	1.58E-22	Dbp80	PREDICTED: ATP-dependent RNA helicase DDX19A-like [Hyalella azteca]	-	-	-	-	-	-	-
4	ncbi_113810074	RPS14	0.794600326	0.618614349	0.361189086	6.84E-27	1.83E-22	RPS14	ribosome like protein [Marsupenaeus japonicus]	Genetic Information Processing	Translation	ko03010//Ribosome	K02955	GO:0030529//intracellular ribonucleoprotein complex	-	GO:0010467//gene expression
4	ncbi_113805306	Sucla2	0.896690099	0.636885198	0.493576126	7.14E-27	1.91E-22	Sucla2	PREDICTED: succinyl-CoA ligase [ADP-forming] subunit beta, mitochondrial-like [Hyalella azteca]	Metabolism;Metabolism;Metabolism;Metabolism	Global and overview maps;Global and overview maps;Carbohydrate metabolism;Carbohydrate metabolism	ko01100//Metabolic pathways;ko01200//Carbon metabolism;ko00020//Citrate cycle (TCA cycle);ko00640//Propanoate metabolism	K01900;K01900;K01900;K01900	-	-	-
4	ncbi_113825996	Abcc5	0.84707109	0.481110998	0.816113274	8.68E-27	2.32E-22	Abcc5	ATP-binding cassette transporter sub-family C member 5 [Tigriopus japonicus]	Environmental Information Processing;Human Diseases	Membrane transport;Drug resistance	ko02010//ABC transporters;ko01523//Antifolate resistance	K05668;K05668	-	-	-
4	ncbi_113814090	ncbi_113814090	1.563225275	0.987354301	0.662885922	1.33E-26	3.57E-22	--	-	-	-	-	-	-	-	-
4	ncbi_113816281	ncbi_113816281	10.58818133	7.005367012	0.595922266	2.39E-26	6.41E-22	--	dTDP-glucose 4,6-dehydratase, partial [Stegodyphus mimosarum]	-	-	-	-	-	-	-
4	ncbi_113830023	Stat5b	0.947450165	0.620871223	0.609755994	3.86E-26	1.03E-21	Stat5b	STAT [Litopenaeus vannamei]	Human Diseases;Human Diseases;Human Diseases;Cellular Processes;Organismal Systems;Human Diseases;Human Diseases;Human Diseases;Environmental Information Processing;Human Diseases;Human Diseases;Human Diseases;Organismal Systems;Environmental Information Processing;Organismal Systems;Organismal Systems	Cancers;Infectious diseases;Cancers;Cell growth and death;Immune system;Endocrine and metabolic diseases;Infectious diseases;Infectious diseases;Signal transduction;Cancers;Cancers;Cancers;Endocrine system;Signal transduction;Immune system;Immune system	ko05200//Pathways in cancer;ko05166//HTLV-I infection;ko05203//Viral carcinogenesis;ko04217//Necroptosis;ko04062//Chemokine signaling pathway;ko04933//AGE-RAGE signaling pathway in diabetic complications;ko05161//Hepatitis B;ko05162//Measles;ko04012//ErbB signaling pathway;ko05220//Chronic myeloid leukemia;ko05223//Non-small cell lung cancer;ko05221//Acute myeloid leukemia;ko04917//Prolactin sign…	K11224;K11224;K11224;K11224;K11224;K11224;K11224;K11224;K11224;K11224;K11224;K11224;K11224;K11224;K11224;K11224	GO:0044424//intracellular part	-	GO:0010467//gene expression;GO:0034645//cellular macromolecule biosynthetic process;GO:0050794//regulation of cellular process
4	ncbi_113818357	csn1	0.72921429	0.468864347	0.637172254	5.36E-26	1.44E-21	csn1	PREDICTED: COP9 signalosome complex subunit 1-like [Crassostrea gigas]	-	-	-	-	-	-	-
4	ncbi_113806139	Parp14	1.53663158	0.910624131	0.754843713	5.84E-26	1.56E-21	Parp14	PREDICTED: poly [ADP-ribose] polymerase 12-like [Ictalurus punctatus]	-	-	-	-	-	-	-
4	ncbi_113802110	RPN1	3.311968213	2.390166237	0.470577865	6.74E-26	1.80E-21	RPN1	ribophorin I [Penaeus monodon]	Metabolism;Genetic Information Processing;Metabolism	Global and overview maps;Folding, sorting and degradation;Glycan biosynthesis and metabolism	ko01100//Metabolic pathways;ko04141//Protein processing in endoplasmic reticulum;ko00510//N-Glycan biosynthesis	K12666;K12666;K12666	-	-	-
4	ncbi_113805905	Non1	3.68110779	1.563227448	1.235612291	9.13E-26	2.45E-21	Non1	PREDICTED: probable nucleolar GTP-binding protein 1 [Bombus terrestris]	Genetic Information Processing	Translation	ko03008//Ribosome biogenesis in eukaryotes	K06943	GO:0043231//intracellular membrane-bounded organelle	-	-
4	ncbi_113827827	RBM39	2.047303778	1.387948017	0.560771649	1.04E-25	2.78E-21	RBM39	PREDICTED: RNA-binding protein 39 isoform X1 [Dendroctonus ponderosae]	-	-	-	-	-	-	-
4	ncbi_113807387	Sirt2	0.759559779	0.517481591	0.553655972	1.13E-25	3.04E-21	Sirt2	NAD-dependent deacetylase sirtuin-2 [Zootermopsis nevadensis]	-	-	-	-	-	GO:0000166//nucleotide binding;GO:0043167//ion binding	-
4	ncbi_113820366	Csde1	1.470453165	0.930499126	0.660184135	1.18E-25	3.16E-21	Csde1	PREDICTED: cold shock domain-containing protein E1-like [Hyalella azteca]	-	-	-	-	-	-	-
4	ncbi_113816361	ncbi_113816361	1.302150788	0.615389051	1.081325841	1.60E-25	4.28E-21	--	-	-	-	-	-	-	-	-
4	ncbi_113826605	Suclg2	0.966549363	0.689399524	0.487503112	1.88E-25	5.04E-21	Suclg2	PREDICTED: succinyl-CoA ligase [GDP-forming] subunit beta, mitochondrial-like, partial [Hyalella azteca]	Metabolism;Metabolism;Metabolism;Metabolism	Global and overview maps;Global and overview maps;Carbohydrate metabolism;Carbohydrate metabolism	ko01100//Metabolic pathways;ko01200//Carbon metabolism;ko00020//Citrate cycle (TCA cycle);ko00640//Propanoate metabolism	K01900;K01900;K01900;K01900	-	GO:0003824//catalytic activity;GO:0032550//purine ribonucleoside binding	-
4	ncbi_113817244	Dst	1.087562138	0.549990161	0.983620116	3.13E-25	8.39E-21	Dst	PREDICTED: dystonin-like isoform X2 [Hyalella azteca]	-	-	-	-	-	-	-
4	ncbi_113809502	Pabpc1	14.45627135	10.65021414	0.440813053	3.56E-25	9.54E-21	Pabpc1	PREDICTED: polyadenylate-binding protein 4-like isoform X1 [Cephus cinctus]	Genetic Information Processing;Genetic Information Processing;Genetic Information Processing	Translation;Translation;Folding, sorting and degradation	ko03013//RNA transport;ko03015//mRNA surveillance pathway;ko03018//RNA degradation	K13126;K13126;K13126	-	-	-
4	ncbi_113803568	Ptp4a1	2.830582796	1.912051528	0.56597772	3.65E-25	9.78E-21	Ptp4a1	PREDICTED: protein tyrosine phosphatase type IVA 1 [Orussus abietinus]	-	-	-	-	-	GO:0004721//phosphoprotein phosphatase activity	GO:0006796//phosphate-containing compound metabolic process
4	ncbi_113819728	ncbi_113819728	1.208954161	0.839459548	0.526226832	4.74E-25	1.27E-20	--	-	-	-	-	-	-	-	-
4	ncbi_113829035	Anp32a	1.576140707	1.150502253	0.454132525	1.11E-24	2.97E-20	Anp32a	PREDICTED: acidic leucine-rich nuclear phosphoprotein 32 family member A-like [Hyalella azteca]	-	-	-	-	-	-	-
4	ncbi_113801962	NUDC	1.226058372	0.921972695	0.411231737	1.28E-24	3.43E-20	NUDC	PREDICTED: nuclear migration protein nudC [Macaca fascicularis]	-	-	-	-	-	-	-
4	ncbi_113821415	Rbm17	0.644777071	0.450206874	0.518212356	1.42E-24	3.80E-20	Rbm17	PREDICTED: splicing factor 45 [Papilio xuthus]	Genetic Information Processing	Transcription	ko03040//Spliceosome	K12840	-	-	-
4	ncbi_113812898	U2af38	1.010888539	0.764134261	0.403725882	2.28E-24	6.11E-20	U2af38	PREDICTED: splicing factor U2af 38 kDa subunit [Anoplophora glabripennis]	Genetic Information Processing;Human Diseases	Transcription;Infectious diseases	ko03040//Spliceosome;ko05131//Shigellosis	K12836;K12836	GO:0043231//intracellular membrane-bounded organelle	GO:0003676//nucleic acid binding;GO:0043169//cation binding	-
4	ncbi_113813082	psmc3-b	2.370117862	1.819321082	0.381558625	3.15E-24	8.44E-20	psmc3-b	PREDICTED: 26S protease regulatory subunit 6A-B [Hyalella azteca]	Human Diseases;Genetic Information Processing	Infectious diseases;Folding, sorting and degradation	ko05169//Epstein-Barr virus infection;ko03050//Proteasome	K03065;K03065	GO:0044424//intracellular part	GO:0003824//catalytic activity;GO:0032550//purine ribonucleoside binding	GO:0009057//macromolecule catabolic process
4	ncbi_113806953	lig	1.197710321	0.794047682	0.592981472	3.36E-24	9.01E-20	lig	PREDICTED: protein lingerer-like isoform X2 [Hyalella azteca]	-	-	-	-	-	-	-
4	ncbi_113814996	ncbi_113814996	5.48551459	3.667939241	0.580657223	3.47E-24	9.30E-20	--	PREDICTED: ribosome-binding protein 1 isoform X19 [Crassostrea gigas]	Genetic Information Processing	Folding, sorting and degradation	ko04141//Protein processing in endoplasmic reticulum	K14000	-	-	-
4	ncbi_113826159	Pip5k1a	0.831609126	0.476687746	0.802861052	7.68E-24	2.06E-19	Pip5k1a	PREDICTED: phosphatidylinositol 4-phosphate 5-kinase type-1 alpha isoform X4 [Cephus cinctus]	Metabolism;Cellular Processes;Cellular Processes;Cellular Processes;Human Diseases;Environmental Information Processing;Metabolism;Organismal Systems;Environmental Information Processing	Global and overview maps;Cellular community - eukaryotes;Cell motility;Transport and catabolism;Cancers;Signal transduction;Carbohydrate metabolism;Immune system;Signal transduction	ko01100//Metabolic pathways;ko04510//Focal adhesion;ko04810//Regulation of actin cytoskeleton;ko04144//Endocytosis;ko05231//Choline metabolism in cancer;ko04072//Phospholipase D signaling pathway;ko00562//Inositol phosphate metabolism;ko04666//Fc gamma R-mediated phagocytosis;ko04070//Phosphatidylinositol signaling system	K00889;K00889;K00889;K00889;K00889;K00889;K00889;K00889;K00889	-	-	-
4	ncbi_113823576	ced-3	0.88819412	0.589729435	0.590821816	1.11E-23	2.96E-19	ced-3	PREDICTED: cell death protein 3-like [Limulus polyphemus]	Cellular Processes;Cellular Processes	Cell growth and death;Cell growth and death	ko04214//Apoptosis - fly;ko04215//Apoptosis - multiple species	K20009;K20009	-	-	-
4	ncbi_113830031	ncbi_113830031	1.208790192	0.763539487	0.662789185	2.00E-23	5.37E-19	--	-	-	-	-	-	-	-	-
4	ncbi_113819182	ncbi_113819182	2.15880729	1.093876787	0.980784221	2.20E-23	5.89E-19	--	-	-	-	-	-	-	-	-
4	ncbi_113828196	Nop17l	0.733288763	0.47987293	0.611729001	2.32E-23	6.20E-19	Nop17l	PREDICTED: protein kintoun [Acromyrmex echinatior]	-	-	-	-	-	-	-
4	ncbi_113805521	eIF3-S8	1.466814814	1.096192967	0.420184958	2.65E-23	7.10E-19	eIF3-S8	PREDICTED: eukaryotic translation initiation factor 3 subunit C-like [Hyalella azteca]	Genetic Information Processing	Translation	ko03013//RNA transport	K03252	-	-	-
4	ncbi_113799911	ANKFN1	0.795792845	0.517945817	0.619591744	4.05E-23	1.08E-18	ANKFN1	PREDICTED: ankyrin repeat and fibronectin type-III domain-containing protein 1-like isoform X2 [Hyalella azteca]	-	-	-	-	-	-	-
4	ncbi_113802160	smc1a	0.95922645	0.684103752	0.487656299	4.27E-23	1.14E-18	smc1a	PREDICTED: structural maintenance of chromosomes protein 1A-like [Hyalella azteca]	Cellular Processes;Cellular Processes	Cell growth and death;Cell growth and death	ko04110//Cell cycle;ko04114//Oocyte meiosis	K06636;K06636	-	-	-
4	ncbi_113812048	CWC15	0.767324041	0.585687079	0.38970589	4.57E-23	1.22E-18	CWC15	PREDICTED: spliceosome-associated protein CWC15 homolog [Hyalella azteca]	Genetic Information Processing	Transcription	ko03040//Spliceosome	K12863	-	-	-
4	ncbi_113803689	ncbi_113803689	2.273476787	1.775899297	0.356350499	5.21E-23	1.40E-18	--	PREDICTED: poly [ADP-ribose] polymerase 3-like [Sinocyclocheilus rhinocerous]	Cellular Processes;Cellular Processes;Cellular Processes;Organismal Systems;Genetic Information Processing;Environmental Information Processing	Cell growth and death;Cell growth and death;Cell growth and death;Aging;Replication and repair;Signal transduction	ko04210//Apoptosis;ko04217//Necroptosis;ko04214//Apoptosis - fly;ko04212//Longevity regulating pathway - worm;ko03410//Base excision repair;ko04064//NF-kappa B signaling pathway	K10798;K10798;K10798;K10798;K10798;K10798	-	-	-
4	ncbi_113810822	mier1	0.762366356	0.49829501	0.613484326	5.51E-23	1.48E-18	mier1	PREDICTED: mucin-5AC-like [Hyalella azteca]	-	-	-	-	-	-	-
4	ncbi_113810427	Ylpm1	1.110713351	0.692940023	0.680684147	5.73E-23	1.53E-18	Ylpm1	PREDICTED: YLP motif-containing protein 1-like [Limulus polyphemus]	-	-	-	-	-	-	-
4	ncbi_113830314	gkap1-a	1.839795306	1.407935125	0.385964403	6.93E-23	1.86E-18	gkap1-a	PREDICTED: G kinase-anchoring protein 1-like [Hyalella azteca]	-	-	-	-	-	-	-
4	ncbi_113822475	ncbi_113822475	2.285543186	0.79716296	1.519590498	9.61E-23	2.57E-18	--	-	-	-	-	-	-	-	-
4	ncbi_113821650	GA21225	1.655673277	1.169205684	0.501889258	1.00E-22	2.69E-18	GA21225	PREDICTED: zinc finger CCCH domain-containing protein 15 homolog [Plutella xylostella]	-	-	-	-	-	-	-
4	ncbi_113820463	ItgaPS4	2.617665895	1.727196037	0.599849133	1.30E-22	3.49E-18	ItgaPS4	integrin alpha 4, partial [Fenneropenaeus chinensis]	Human Diseases;Cellular Processes;Environmental Information Processing;Cellular Processes;Human Diseases;Human Diseases;Organismal Systems;Human Diseases;Environmental Information Processing;Organismal Systems;Environmental Information Processing;Human Diseases;Organismal Systems	Infectious diseases;Cellular community - eukaryotes;Signal transduction;Cell motility;Cardiovascular diseases;Cardiovascular diseases;Immune system;Cardiovascular diseases;Signaling molecules and interaction;Immune system;Signaling molecules and interaction;Infectious diseases;Immune system	ko05165//Human papillomavirus infection;ko04510//Focal adhesion;ko04151//PI3K-Akt signaling pathway;ko04810//Regulation of actin cytoskeleton;ko05410//Hypertrophic cardiomyopathy (HCM);ko05414//Dilated cardiomyopathy (DCM);ko04670//Leukocyte transendothelial migration;ko05412//Arrhythmogenic right ventricular cardiomyopathy (ARVC);ko04512//ECM-receptor interaction;ko04640//Hematopoietic cell line…	K06483;K06483;K06483;K06483;K06483;K06483;K06483;K06483;K06483;K06483;K06483;K06483;K06483	-	-	-
4	ncbi_113799956	Cblb	0.915337156	0.584601117	0.646850659	3.47E-22	9.29E-18	Cblb	PREDICTED: E3 ubiquitin-protein ligase CBL-B-like isoform X1 [Hyalella azteca]	Human Diseases;Human Diseases;Cellular Processes;Genetic Information Processing;Human Diseases;Organismal Systems;Environmental Information Processing;Human Diseases	Cancers;Cancers;Transport and catabolism;Folding, sorting and degradation;Infectious diseases;Endocrine system;Signal transduction;Cancers	ko05200//Pathways in cancer;ko05205//Proteoglycans in cancer;ko04144//Endocytosis;ko04120//Ubiquitin mediated proteolysis;ko05100//Bacterial invasion of epithelial cells;ko04910//Insulin signaling pathway;ko04012//ErbB signaling pathway;ko05220//Chronic myeloid leukemia	K04707;K04707;K04707;K04707;K04707;K04707;K04707;K04707	GO:0043231//intracellular membrane-bounded organelle	GO:0019787//ubiquitin-like protein transferase activity;GO:0046914//transition metal ion binding;GO:0060089//molecular transducer activity	GO:0007165//signal transduction;GO:0032446//protein modification by small protein conjugation
4	ncbi_113814826	Nfyb	0.993971813	0.757745822	0.391490947	3.90E-22	1.04E-17	Nfyb	PREDICTED: nuclear transcription factor Y subunit B-1-like isoform X1 [Hyalella azteca]	Human Diseases;Human Diseases;Organismal Systems	Infectious diseases;Infectious diseases;Immune system	ko05166//HTLV-I infection;ko05152//Tuberculosis;ko04612//Antigen processing and presentation	K08065;K08065;K08065	-	GO:0005488//binding	-
4	ncbi_113802210	ncbi_113802210	0.992079375	0.68113978	0.542504663	4.59E-22	1.23E-17	--	PREDICTED: serine/Arginine-related protein 53-like [Hyalella azteca]	-	-	-	-	-	-	-
4	ncbi_113828887	Ars2	2.107337769	1.511274243	0.479656089	4.96E-22	1.33E-17	Ars2	arsenite-resistance protein 2-like protein [Litopenaeus vannamei]	-	-	-	-	-	-	-
4	ncbi_113813010	ncbi_113813010	1.470648829	0.809177136	0.861925331	5.28E-22	1.41E-17	--	PREDICTED: uncharacterized protein LOC108678870 [Hyalella azteca]	-	-	-	-	-	-	-
4	ncbi_113801300	U2af50	1.597528088	1.107251701	0.528858083	5.71E-22	1.53E-17	U2af50	PREDICTED: splicing factor U2AF 50 kDa subunit-like isoform X2 [Hyalella azteca]	Genetic Information Processing	Transcription	ko03040//Spliceosome	K12837	-	-	-
4	ncbi_113816573	mmp11	11.03292726	7.147192733	0.62636702	8.27E-22	2.21E-17	mmp11	PREDICTED: matrix metalloproteinase-2-like [Hyalella azteca]	Organismal Systems	Endocrine system	ko04928//Parathyroid hormone synthesis, secretion and action	K07997	-	-	-
4	ncbi_113820296	Ptbp1	1.09357174	0.623936897	0.809575835	8.73E-22	2.34E-17	Ptbp1	PREDICTED: polypyrimidine tract-binding protein 2 isoform X6 [Orussus abietinus]	-	-	-	-	-	-	-
4	ncbi_113828517	Ciao1	0.716949752	0.546483809	0.391693255	9.66E-22	2.59E-17	Ciao1	PREDICTED: probable cytosolic iron-sulfur protein assembly protein CIAO1 [Trichechus manatus latirostris]	-	-	-	-	GO:0043234//protein complex	-	-
4	ncbi_113823679	Grpel1	1.252781727	0.975418128	0.361042385	1.25E-21	3.35E-17	Grpel1	PREDICTED: grpE protein homolog, mitochondrial-like [Hyalella azteca]	-	-	-	-	-	GO:0005515//protein binding	-
4	ncbi_113801627	beta-Spec	1.223431509	0.631250513	0.954648777	2.03E-21	5.43E-17	beta-Spec	PREDICTED: spectrin beta chain-like [Hyalella azteca]	-	-	-	-	-	-	-
4	ncbi_113809284	ncbi_113809284	1.140905256	0.585933922	0.96136911	2.05E-21	5.49E-17	--	-	-	-	-	-	-	-	-
4	ncbi_113827755	ncbi_113827755	0.776361508	0.572457207	0.439560741	2.20E-21	5.90E-17	--	-	-	-	-	-	-	-	-
4	ncbi_113800567	RPS26	12.41154869	9.299393609	0.416474594	2.92E-21	7.82E-17	RPS26	PREDICTED: 40S ribosomal protein S26-like [Hyalella azteca]	Genetic Information Processing	Translation	ko03010//Ribosome	K02976	GO:0030529//intracellular ribonucleoprotein complex	-	GO:0010467//gene expression
4	ncbi_113820651	SRSF1	1.295512801	0.927941871	0.481416932	3.18E-21	8.51E-17	SRSF1	TPA_inf: alternative splicing factor ASF/SF2 [Amblyomma variegatum]	Genetic Information Processing;Human Diseases;Organismal Systems	Transcription;Infectious diseases;Immune system	ko03040//Spliceosome;ko05168//Herpes simplex infection;ko04657//IL-17 signaling pathway	K12890;K12890;K12890	-	GO:0097159//organic cyclic compound binding	-
4	ncbi_113807539	ubi	2.927601165	2.134361228	0.45591466	3.27E-21	8.76E-17	ubi	PREDICTED: polyubiquitin-B-like [Leptonychotes weddellii]	Organismal Systems	Endocrine system	ko03320//PPAR signaling pathway	K08770	-	-	-
4	ncbi_113820086	cgh-1	1.035435984	0.680351797	0.605885527	5.12E-21	1.37E-16	cgh-1	DDX6, partial [Eriocheir sinensis]	Genetic Information Processing	Folding, sorting and degradation	ko03018//RNA degradation	K12614	-	-	-
4	ncbi_113806303	ncbi_113806303	2.244571141	0.775174534	1.533846741	5.33E-21	1.43E-16	--	PREDICTED: glioma tumor suppressor candidate region gene 2 protein-like isoform X1 [Limulus polyphemus]	Human Diseases	Infectious diseases	ko05168//Herpes simplex infection	K14840	-	-	-
4	ncbi_113800045	ncbi_113800045	5.908431004	3.108222879	0.926685113	8.70E-21	2.33E-16	--	-	-	-	-	-	-	-	-
4	ncbi_113824907	gata3	0.791939669	0.554730848	0.513602575	1.14E-20	3.04E-16	gata3	GATA-binding protein 6, partial [Microtus levis]	Organismal Systems;Organismal Systems;Organismal Systems;Human Diseases	Endocrine system;Immune system;Immune system;Immune diseases	ko04928//Parathyroid hormone synthesis, secretion and action;ko04658//Th1 and Th2 cell differentiation;ko04659//Th17 cell differentiation;ko05321//Inflammatiory bowel disease (IBD)	K17895;K17895;K17895;K17895	GO:0031981//nuclear lumen;GO:0044798//nuclear transcription factor complex	GO:0000977//RNA polymerase II regulatory region sequence-specific DNA binding;GO:0000981//RNA polymerase II transcription factor activity, sequence-specific DNA binding;GO:0003712//transcription cofactor activity;GO:0008134//transcription factor binding;GO:0046332//SMAD binding;GO:0046872//metal ion binding	GO:0001819//positive regulation of cytokine production;GO:0002065//columnar/cuboidal epithelial cell differentiation;GO:0003143//embryonic heart tube morphogenesis;GO:0003208//cardiac ventricle morphogenesis;GO:0006950//response to stress;GO:0007369//gastrulation;GO:0007599//hemostasis;GO:0008406//gonad development;GO:0009952//anterior/posterior pattern specification;GO:0014896//muscle hypertroph…
4	ncbi_113818553	eEF1delta	6.906516753	4.69395839	0.557153229	1.61E-20	4.31E-16	eEF1delta	elongation factor 1-delta protein [Eriocheir sinensis]	Human Diseases	Infectious diseases	ko05168//Herpes simplex infection	K15410	GO:0044424//intracellular part	-	GO:0009987//cellular process
4	ncbi_113801328	U2SURP	1.547976004	0.821298063	0.914405306	1.76E-20	4.70E-16	U2SURP	PREDICTED: U2 snRNP-associated SURP motif-containing protein-like [Hyalella azteca]	Genetic Information Processing	Transcription	ko03040//Spliceosome	K12842	-	-	-
4	ncbi_113801894	RIOK3	1.047649382	0.69953246	0.582693061	2.47E-20	6.62E-16	RIOK3	Serine/threonine-protein kinase RIO3 [Daphnia magna]	-	-	-	-	-	GO:0016772//transferase activity, transferring phosphorus-containing groups	-
4	ncbi_113823271	CCT2	1.232674666	0.87783253	0.489774448	2.85E-20	7.63E-16	CCT2	Tcp-1-beta [Litopenaeus vannamei]	-	-	-	-	-	GO:0005515//protein binding	GO:0044267//cellular protein metabolic process
4	ncbi_113827826	ncbi_113827826	0.649225002	0.503719957	0.366096669	4.21E-20	1.13E-15	--	-	-	-	-	-	-	-	-
4	ncbi_113817415	cars	0.815345989	0.542868542	0.586809505	4.36E-20	1.17E-15	cars	PREDICTED: cysteine--tRNA ligase, cytoplasmic [Dufourea novaeangliae]	Genetic Information Processing	Translation	ko00970//Aminoacyl-tRNA biosynthesis	K01883	-	-	-
4	ncbi_5333216	ND2	2.801564589	1.168962579	1.261004006	5.12E-20	1.37E-15	ND2	-	-	-	-	-	-	-	-
4	ncbi_113829115	ncbi_113829115	3.176695894	2.246582149	0.499795171	5.32E-20	1.42E-15	--	-	-	-	-	-	-	-	-
4	ncbi_113815192	ncbi_113815192	0.979904377	0.665723863	0.557717088	7.97E-20	2.13E-15	--	-	-	-	-	-	-	-	-
4	ncbi_113802117	Nop58	2.176950993	0.830061547	1.391018712	8.26E-20	2.21E-15	Nop58	Nucleolar protein nop5 [Daphnia magna]	Genetic Information Processing	Translation	ko03008//Ribosome biogenesis in eukaryotes	K14565	-	-	-
4	ncbi_113820486	sgg	3.968359416	2.928471038	0.438395071	1.25E-19	3.34E-15	sgg	glycogen synthase kinase 3 beta [Macrobrachium nipponense]	Human Diseases;Human Diseases;Cellular Processes;Environmental Information Processing;Human Diseases;Organismal Systems;Environmental Information Processing;Human Diseases;Human Diseases;Environmental Information Processing;Human Diseases;Human Diseases;Human Diseases;Human Diseases;Cellular Processes;Organismal Systems;Environmental Information Processing;Human Diseases;Organismal Systems;Human …	Cancers;Infectious diseases;Cellular community - eukaryotes;Signal transduction;Cancers;Endocrine system;Signal transduction;Infectious diseases;Infectious diseases;Signal transduction;Neurodegenerative diseases;Infectious diseases;Endocrine and metabolic diseases;Endocrine and metabolic diseases;Cell growth and death;Endocrine system;Signal transduction;Cancers;Immune system;Cancers;Infectious d…	ko05200//Pathways in cancer;ko05165//Human papillomavirus infection;ko04510//Focal adhesion;ko04151//PI3K-Akt signaling pathway;ko05225//Hepatocellular carcinoma;ko04919//Thyroid hormone signaling pathway;ko04390//Hippo signaling pathway;ko05164//Influenza A;ko05166//HTLV-I infection;ko04150//mTOR signaling pathway;ko05010//Alzheimer disease;ko05169//Epstein-Barr virus infection;ko04932//Non-alco…	K03083;K03083;K03083;K03083;K03083;K03083;K03083;K03083;K03083;K03083;K03083;K03083;K03083;K03083;K03083;K03083;K03083;K03083;K03083;K03083;K03083;K03083;K03083;K03083;K03083;K03083;K03083;K03083;K03083;K03083;K03083;K03083;K03083;K03083;K03083;K03083;K03083;K03083;K03083;K03083;K03083;K03083;K03083	-	-	-
4	ncbi_113818090	ttk	3.75250886	2.555341049	0.554339625	1.45E-19	3.87E-15	ttk	PREDICTED: protein bric-a-brac 1-like [Halyomorpha halys]	-	-	-	-	-	-	-
4	ncbi_113820304	ubxn1	1.627403868	1.063998822	0.613075771	1.48E-19	3.97E-15	ubxn1	PREDICTED: UBX domain-containing protein 1 [Fopius arisanus]	-	-	-	-	-	-	-
4	ncbi_113804573	rbm22	0.725762905	0.513132446	0.500167068	2.04E-19	5.46E-15	rbm22	PREDICTED: pre-mRNA-splicing factor RBM22-like [Hyalella azteca]	Genetic Information Processing	Transcription	ko03040//Spliceosome	K12872	GO:0005681//spliceosomal complex	GO:0003723//RNA binding;GO:0043169//cation binding	GO:0000398//mRNA splicing, via spliceosome;GO:0010628//positive regulation of gene expression;GO:0044707//single-multicellular organism process;GO:0050794//regulation of cellular process
4	ncbi_113822721	PNN	0.754000623	0.522607738	0.528837229	2.34E-19	6.27E-15	PNN	PREDICTED: dentin sialophosphoprotein-like [Hyalella azteca]	Genetic Information Processing;Genetic Information Processing	Translation;Translation	ko03013//RNA transport;ko03015//mRNA surveillance pathway	K13114;K13114	-	-	-
4	ncbi_113803611	SAFB2	0.959414761	0.650482958	0.560643376	3.64E-19	9.73E-15	SAFB2	PREDICTED: SAFB-like transcription modulator isoform X1 [Musca domestica]	-	-	-	-	-	-	-
4	ncbi_113808023	NMT2	0.919958172	0.569093306	0.692903057	7.39E-19	1.98E-14	NMT2	PREDICTED: glycylpeptide N-tetradecanoyltransferase [Microplitis demolitor]	-	-	-	-	-	-	-
4	ncbi_113802017	sbds	0.734241968	0.506136197	0.536729925	1.38E-18	3.69E-14	sbds	PREDICTED: ribosome maturation protein SBDS [Maylandia zebra]	Genetic Information Processing	Translation	ko03008//Ribosome biogenesis in eukaryotes	K14574	-	-	-
4	ncbi_113811521	prkrip1	0.992352228	0.676462127	0.552843121	1.55E-18	4.15E-14	prkrip1	PREDICTED: PRKR-interacting protein 1 homolog [Hyalella azteca]	-	-	-	-	-	-	-
4	ncbi_113813926	tdrd7a	0.965828748	0.476054226	1.020641491	4.17E-18	1.12E-13	tdrd7a	PREDICTED: tudor domain-containing protein 7-like isoform X2 [Hyalella azteca]	-	-	-	-	-	-	-
4	ncbi_113809592	ilf2	1.096701418	0.721750379	0.603598935	6.13E-18	1.64E-13	ilf2	interleukin enhancer binding factor [Eriocheir sinensis]	-	-	-	-	-	GO:0003824//catalytic activity;GO:0032550//purine ribonucleoside binding	GO:0002376//immune system process
4	ncbi_113814993	SMARCC2	2.270228917	1.677126193	0.436846531	7.15E-18	1.91E-13	SMARCC2	SWI/SNF complex subunit SMARCC2 [Zootermopsis nevadensis]	Organismal Systems;Human Diseases	Environmental adaptation;Cancers	ko04714//Thermogenesis;ko05225//Hepatocellular carcinoma	K11649;K11649	-	-	-
4	ncbi_113817372	hsc71	1.812684749	1.230352529	0.559056296	7.19E-18	1.93E-13	hsc71	heat shock protein 70 [Litopenaeus vannamei]	Genetic Information Processing;Cellular Processes;Human Diseases;Genetic Information Processing;Environmental Information Processing;Organismal Systems;Human Diseases;Human Diseases;Organismal Systems;Human Diseases;Human Diseases;Human Diseases;Organismal Systems	Folding, sorting and degradation;Transport and catabolism;Infectious diseases;Transcription;Signal transduction;Aging;Infectious diseases;Infectious diseases;Endocrine system;Infectious diseases;Infectious diseases;Neurodegenerative diseases;Immune system	ko04141//Protein processing in endoplasmic reticulum;ko04144//Endocytosis;ko05164//Influenza A;ko03040//Spliceosome;ko04010//MAPK signaling pathway;ko04213//Longevity regulating pathway - multiple species;ko05169//Epstein-Barr virus infection;ko05145//Toxoplasmosis;ko04915//Estrogen signaling pathway;ko05162//Measles;ko05134//Legionellosis;ko05020//Prion diseases;ko04612//Antigen processing and p…	K03283;K03283;K03283;K03283;K03283;K03283;K03283;K03283;K03283;K03283;K03283;K03283;K03283	-	-	-
4	ncbi_113820059	ncbi_113820059	4.067951455	3.118231396	0.383574472	7.26E-18	1.94E-13	--	PREDICTED: src kinase-associated phosphoprotein 1-like [Hyalella azteca]	-	-	-	-	-	-	-
4	ncbi_113804185	mRpL23	0.815316204	0.61620981	0.403938039	7.74E-18	2.07E-13	mRpL23	AAEL005150-PA [Aedes aegypti]	Genetic Information Processing	Translation	ko03010//Ribosome	K02892	GO:0000315//organellar large ribosomal subunit	GO:0005198//structural molecule activity	-
4	ncbi_113819796	PCF11	2.153802087	1.249884735	0.785090632	7.94E-18	2.13E-13	PCF11	pre-mRNA cleavage complex 2 protein Pcf11 [Castor canadensis]	Genetic Information Processing	Translation	ko03015//mRNA surveillance pathway	K14400	-	-	-
4	ncbi_113800806	ncbi_113800806	3.20795496	1.992758562	0.686886959	8.78E-18	2.35E-13	--	-	-	-	-	-	-	-	-
4	ncbi_113822609	Slc3a2	4.844377805	3.010025183	0.686535826	8.91E-18	2.39E-13	Slc3a2	PREDICTED: 4F2 cell-surface antigen heavy chain-like isoform X2 [Hyalella azteca]	Environmental Information Processing;Organismal Systems;Cellular Processes	Signal transduction;Digestive system;Cell growth and death	ko04150//mTOR signaling pathway;ko04974//Protein digestion and absorption;ko04216//Ferroptosis	K06519;K06519;K06519	-	-	-
4	ncbi_113813513	BRD8	1.198604878	0.712161667	0.751079463	9.46E-18	2.53E-13	BRD8	Bromodomain-containing protein 8 [Zootermopsis nevadensis]	-	-	-	-	-	-	-
4	ncbi_113822730	CG10417	1.627519938	1.078773873	0.593282731	1.04E-17	2.77E-13	CG10417	PREDICTED: probable protein phosphatase 2C 21 [Anoplophora glabripennis]	-	-	-	-	-	GO:0004721//phosphoprotein phosphatase activity;GO:0043169//cation binding	GO:0006464//cellular protein modification process
4	ncbi_113800275	pabpn1	0.908673944	0.647493711	0.48889653	1.66E-17	4.45E-13	pabpn1	PREDICTED: polyadenylate-binding protein 2 isoform X1 [Anoplophora glabripennis]	Human Diseases;Genetic Information Processing	Infectious diseases;Translation	ko05164//Influenza A;ko03015//mRNA surveillance pathway	K14396;K14396	-	GO:0097159//organic cyclic compound binding	-
4	ncbi_113821644	128up	1.538315761	1.117394727	0.461212751	3.32E-17	8.90E-13	128up	PREDICTED: GTP-binding protein 128up [Copidosoma floridanum]	-	-	-	-	-	GO:0032550//purine ribonucleoside binding	-
4	ncbi_113805527	lrrfip2	3.290051334	2.176330645	0.596212336	4.13E-17	1.11E-12	lrrfip2	leucine-rich repeat flightless-I-interacting protein 2D [Litopenaeus vannamei]	-	-	-	-	-	-	-
4	ncbi_113803517	daf-41	0.743469195	0.516812069	0.524633205	4.68E-17	1.25E-12	daf-41	P23 [Litopenaeus vannamei]	Metabolism;Metabolism	Global and overview maps;Lipid metabolism	ko01100//Metabolic pathways;ko00590//Arachidonic acid metabolism	K15730;K15730	-	-	-
4	ncbi_113829821	ncbi_113829821	4.287541475	2.276320222	0.913447103	5.57E-17	1.49E-12	--	PREDICTED: mastermind-like protein 2 [Aplysia californica]	-	-	-	-	-	-	-
4	ncbi_113828659	snu13	2.401825753	1.068247054	1.168886152	8.10E-17	2.17E-12	snu13	PREDICTED: NHP2-like protein 1 [Lingula anatina]	Genetic Information Processing;Genetic Information Processing	Transcription;Translation	ko03040//Spliceosome;ko03008//Ribosome biogenesis in eukaryotes	K12845;K12845	GO:0030529//intracellular ribonucleoprotein complex;GO:0043231//intracellular membrane-bounded organelle;GO:0043232//intracellular non-membrane-bounded organelle	GO:0003676//nucleic acid binding;GO:0046914//transition metal ion binding	GO:0006396//RNA processing;GO:0022613//ribonucleoprotein complex biogenesis
4	ncbi_113825956	SERPINB1	1.620553185	0.918646325	0.818904928	1.06E-16	2.83E-12	SERPINB1	serine proteinase inhibitor B3 [Litopenaeus vannamei]	-	-	-	-	-	-	-
4	ncbi_113806834	rpl-7	1.209482361	0.910810569	0.409166791	1.21E-16	3.25E-12	rpl-7	ribosomal protein L7 [Litopenaeus vannamei]	Genetic Information Processing	Translation	ko03010//Ribosome	K02937	-	-	-
4	ncbi_113817901	SLC6A9	1.33370286	0.747016836	0.836224615	1.25E-16	3.35E-12	SLC6A9	PREDICTED: sodium- and chloride-dependent glycine transporter 1-like [Hyalella azteca]	-	-	-	-	-	-	GO:0006810//transport
4	ncbi_113814365	PPAF1	0.986714702	0.624010812	0.661061978	1.65E-16	4.41E-12	PPAF1	Chymotrypsin-C [Daphnia magna]	-	-	-	-	-	-	-
4	ncbi_113819352	SHMT1	0.758674778	0.532449011	0.510838201	2.38E-16	6.38E-12	SHMT1	PREDICTED: serine hydroxymethyltransferase, cytosolic-like [Hyalella azteca]	Metabolism;Metabolism;Metabolism;Metabolism;Metabolism;Human Diseases;Metabolism	Global and overview maps;Global and overview maps;Global and overview maps;Amino acid metabolism;Carbohydrate metabolism;Drug resistance;Metabolism of cofactors and vitamins	ko01100//Metabolic pathways;ko01200//Carbon metabolism;ko01230//Biosynthesis of amino acids;ko00260//Glycine, serine and threonine metabolism;ko00630//Glyoxylate and dicarboxylate metabolism;ko01523//Antifolate resistance;ko00670//One carbon pool by folate	K00600;K00600;K00600;K00600;K00600;K00600;K00600	-	GO:0016742//hydroxymethyl-, formyl- and related transferase activity;GO:0043168//anion binding	GO:0006730//one-carbon metabolic process;GO:0009069//serine family amino acid metabolic process
4	ncbi_113809399	acbd6	1.181232368	0.867322299	0.445652688	2.59E-16	6.93E-12	acbd6	PREDICTED: acyl-CoA-binding domain-containing protein 6 [Takifugu rubripes]	-	-	-	-	-	-	-
4	ncbi_113810876	supt6h	1.589840002	0.865596616	0.877114819	2.98E-16	7.99E-12	supt6h	PREDICTED: transcription elongation factor SPT6-like [Hyalella azteca]	-	-	-	-	-	-	GO:0006139//nucleobase-containing compound metabolic process;GO:0010467//gene expression;GO:0034645//cellular macromolecule biosynthetic process
4	ncbi_113817898	FKBP4	1.419045306	0.831035799	0.771938121	5.14E-16	1.38E-11	FKBP4	FK506-binding protein 4 [Zootermopsis nevadensis]	Organismal Systems	Endocrine system	ko04915//Estrogen signaling pathway	K09571	GO:0043227//membrane-bounded organelle;GO:0044424//intracellular part	GO:0005515//protein binding;GO:0097159//organic cyclic compound binding;GO:1901363//heterocyclic compound binding	GO:0003006//developmental process involved in reproduction;GO:0007275//multicellular organism development;GO:0009987//cellular process
4	ncbi_113802431	ncbi_113802431	1.716413371	1.15199037	0.575268389	5.59E-16	1.50E-11	--	PREDICTED: LIM domain and actin-binding protein 1 isoform X15 [Cimex lectularius]	-	-	-	-	-	-	-
4	ncbi_113817213	crebl2	1.620678305	1.112412298	0.542906154	6.15E-16	1.65E-11	crebl2	PREDICTED: cAMP-responsive element-binding protein-like 2 [Bombus terrestris]	-	-	-	-	-	-	-
4	ncbi_113805128	BRD2	1.724063012	1.08062298	0.673949237	6.21E-16	1.66E-11	BRD2	PREDICTED: bromodomain-containing protein 3-like [Hyalella azteca]	-	-	-	-	-	-	-
4	ncbi_113818649	Pka-R2	2.705414437	1.761280294	0.619225094	7.84E-16	2.10E-11	Pka-R2	PREDICTED: cAMP-dependent protein kinase type II regulatory subunit-like [Hyalella azteca]	-	-	-	-	GO:0044424//intracellular part	GO:0019887//protein kinase regulator activity	GO:0001932//regulation of protein phosphorylation
4	ncbi_113826348	ncbi_113826348	0.757880451	0.48677416	0.638717707	1.22E-15	3.27E-11	--	Protein HEXIM [Zootermopsis nevadensis]	-	-	-	-	-	-	-
4	ncbi_113804850	ncbi_113804850	0.804742203	0.521103227	0.626957503	1.61E-15	4.32E-11	--	-	-	-	-	-	-	-	-
4	ncbi_113802390	uck2a	1.161747618	0.646570889	0.845416229	1.87E-15	5.01E-11	uck2a	PREDICTED: uridine-cytidine kinase 2-like [Hyalella azteca]	Metabolism;Metabolism;Metabolism	Global and overview maps;Xenobiotics biodegradation and metabolism;Nucleotide metabolism	ko01100//Metabolic pathways;ko00983//Drug metabolism - other enzymes;ko00240//Pyrimidine metabolism	K00876;K00876;K00876	-	GO:0016772//transferase activity, transferring phosphorus-containing groups;GO:0032550//purine ribonucleoside binding	GO:0006796//phosphate-containing compound metabolic process
4	ncbi_113807991	Cisd2	0.846584622	0.613275725	0.465118436	2.08E-15	5.57E-11	Cisd2	PREDICTED: CDGSH iron-sulfur domain-containing protein 2 homolog B-like [Hyalella azteca]	-	-	-	-	-	-	-
4	ncbi_113805673	ncbi_113805673	0.815465248	0.520723881	0.647104824	2.17E-15	5.82E-11	--	-	-	-	-	-	-	-	-
4	ncbi_113828513	Nif3l1	0.695344034	0.500579253	0.474128455	2.91E-15	7.79E-11	Nif3l1	PREDICTED: NIF3-like protein 1 [Larimichthys crocea]	-	-	-	-	-	-	-
4	ncbi_113812677	CSNK2A1	3.483774603	2.62231033	0.409812859	3.95E-15	1.06E-10	CSNK2A1	Casein kinase II subunit alpha [Daphnia magna]	Cellular Processes;Human Diseases;Environmental Information Processing;Human Diseases;Genetic Information Processing;Human Diseases;Environmental Information Processing;Cellular Processes	Cellular community - eukaryotes;Infectious diseases;Signal transduction;Infectious diseases;Translation;Infectious diseases;Signal transduction;Transport and catabolism	ko04520//Adherens junction;ko05169//Epstein-Barr virus infection;ko04310//Wnt signaling pathway;ko05168//Herpes simplex infection;ko03008//Ribosome biogenesis in eukaryotes;ko05162//Measles;ko04064//NF-kappa B signaling pathway;ko04137//Mitophagy - animal	K03097;K03097;K03097;K03097;K03097;K03097;K03097;K03097	-	-	-
4	ncbi_113827003	Sap30bp	0.782156842	0.548290146	0.512518387	4.36E-15	1.17E-10	Sap30bp	PREDICTED: SAP30-binding protein-like [Hyalella azteca]	-	-	-	-	-	-	-
4	ncbi_113815938	HARS	0.781467572	0.521748325	0.582831945	5.40E-15	1.44E-10	HARS	PREDICTED: histidine--tRNA ligase, cytoplasmic-like isoform X2 [Hyalella azteca]	Genetic Information Processing	Translation	ko00970//Aminoacyl-tRNA biosynthesis	K01892	-	-	-
4	ncbi_113813818	for	1.91655841	1.152485503	0.733769364	1.04E-14	2.78E-10	for	PREDICTED: cGMP-dependent protein kinase, isozyme 2 forms cD5/T2-like [Hyalella azteca]	Organismal Systems;Organismal Systems;Environmental Information Processing;Organismal Systems;Cellular Processes;Organismal Systems;Organismal Systems;Organismal Systems;Organismal Systems;Organismal Systems	Environmental adaptation;Immune system;Signal transduction;Circulatory system;Cellular community - eukaryotes;Environmental adaptation;Digestive system;Nervous system;Endocrine system;Sensory system	ko04714//Thermogenesis;ko04611//Platelet activation;ko04022//cGMP - PKG signaling pathway;ko04270//Vascular smooth muscle contraction;ko04540//Gap junction;ko04713//Circadian entrainment;ko04970//Salivary secretion;ko04730//Long-term depression;ko04923//Regulation of lipolysis in adipocyte;ko04740//Olfactory transduction	K07376;K07376;K07376;K07376;K07376;K07376;K07376;K07376;K07376;K07376	-	-	-
4	ncbi_113807167	Ssrp	0.767313502	0.532694456	0.526507876	1.40E-14	3.74E-10	Ssrp	PREDICTED: FACT complex subunit Ssrp1-like [Hyalella azteca]	-	-	-	-	-	-	-
4	ncbi_113820190	Sptlc2	2.57063839	1.666363275	0.625423732	1.42E-14	3.80E-10	Sptlc2	PREDICTED: serine palmitoyltransferase 2-like isoform X2 [Hyalella azteca]	Metabolism;Environmental Information Processing;Metabolism	Global and overview maps;Signal transduction;Lipid metabolism	ko01100//Metabolic pathways;ko04071//Sphingolipid signaling pathway;ko00600//Sphingolipid metabolism	K00654;K00654;K00654	-	-	-
4	ncbi_113817672	Tinagl1	9.198606351	6.417741121	0.519349705	1.99E-14	5.32E-10	Tinagl1	PREDICTED: tubulointerstitial nephritis antigen-like [Thamnophis sirtalis]	-	-	-	-	GO:0044421//extracellular region part	-	-
4	ncbi_113806630	MBD4	2.353449196	1.523873327	0.627033727	4.47E-14	1.20E-09	MBD4	PREDICTED: methyl-CpG-binding domain protein 4-like [Hyalella azteca]	Genetic Information Processing	Replication and repair	ko03410//Base excision repair	K10801	-	-	GO:0006281//DNA repair
4	ncbi_113817647	tarbp2	1.580103728	0.792746003	0.995088666	5.02E-14	1.34E-09	tarbp2	TRBP1 [Litopenaeus vannamei]	-	-	-	-	-	-	-
4	ncbi_5333208	ND3	3.631272635	1.600205331	1.182218215	5.35E-14	1.43E-09	ND3	-	-	-	-	-	-	-	-
4	ncbi_113822175	TRA2B	0.896826095	0.553506248	0.696228654	7.30E-14	1.95E-09	TRA2B	transformer-2 protein [Penaeus monodon]	Genetic Information Processing	Transcription	ko03040//Spliceosome	K12897	-	-	-
4	ncbi_113801008	RS2Z33	8.469900114	5.064860673	0.741822373	9.70E-14	2.60E-09	RS2Z33	PREDICTED: serine/arginine-rich-splicing factor SR34-like isoform X2 [Hyalella azteca]	Genetic Information Processing;Human Diseases	Transcription;Infectious diseases	ko03040//Spliceosome;ko05168//Herpes simplex infection	K12896;K12896	-	-	-
4	ncbi_113805571	cni	1.699295228	1.050814417	0.693428623	1.19E-13	3.19E-09	cni	PREDICTED: protein cornichon-like [Hyalella azteca]	-	-	-	-	-	-	GO:0007165//signal transduction
4	ncbi_113816534	Drg2	1.103551021	0.751771962	0.553786318	2.06E-13	5.52E-09	Drg2	Developmentally-regulated GTP-binding protein 2 [Zootermopsis nevadensis]	-	-	-	-	-	GO:0032550//purine ribonucleoside binding	-
4	ncbi_113821382	ncbi_113821382	8.383224031	6.425817141	0.383625258	3.16E-13	8.46E-09	--	-	-	-	-	-	-	-	-
4	ncbi_113817808	POLR2E	1.641200852	1.161135572	0.49921538	5.88E-13	1.57E-08	POLR2E	PREDICTED: DNA-directed RNA polymerases I, II, and III subunit RPABC1-like [Hyalella azteca]	Metabolism;Human Diseases;Metabolism;Human Diseases;Metabolism;Genetic Information Processing;Organismal Systems	Global and overview maps;Neurodegenerative diseases;Nucleotide metabolism;Infectious diseases;Nucleotide metabolism;Transcription;Immune system	ko01100//Metabolic pathways;ko05016//Huntington disease;ko00230//Purine metabolism;ko05169//Epstein-Barr virus infection;ko00240//Pyrimidine metabolism;ko03020//RNA polymerase;ko04623//Cytosolic DNA-sensing pathway	K03013;K03013;K03013;K03013;K03013;K03013;K03013	GO:0043231//intracellular membrane-bounded organelle	GO:0034062//RNA polymerase activity	GO:0034645//cellular macromolecule biosynthetic process
4	ncbi_113808397	ncbi_113808397	1.206095972	0.806731571	0.580184089	9.63E-13	2.58E-08	--	PREDICTED: polyadenylate-binding protein-interacting protein 1-like isoform X2 [Parasteatoda tepidariorum]	Genetic Information Processing	Translation	ko03013//RNA transport	K14322	-	-	-
4	ncbi_113804928	CAPRIN1	1.273024348	0.807486413	0.656750123	9.71E-13	2.60E-08	CAPRIN1	PREDICTED: caprin-1 isoform X2 [Crassostrea gigas]	-	-	-	-	-	-	-
4	ncbi_113829113	sars	2.610794188	1.860563189	0.488749344	1.14E-12	3.05E-08	sars	Seryl-tRNA synthetase, cytoplasmic [Zootermopsis nevadensis]	Genetic Information Processing	Translation	ko00970//Aminoacyl-tRNA biosynthesis	K01875	-	-	-
4	ncbi_113829686	ncbi_113829686	1.247923773	0.89387601	0.48138318	1.85E-12	4.96E-08	--	-	-	-	-	-	-	-	-
4	ncbi_113807055	Rwdd1	0.678603262	0.501126428	0.437393742	2.90E-12	7.78E-08	Rwdd1	small androgen receptor-interacting protein 1 [Penaeus monodon]	-	-	-	-	-	-	-
4	ncbi_113828837	Tbca	1.234827395	0.736685228	0.745189176	3.59E-12	9.61E-08	Tbca	PREDICTED: tubulin-specific chaperone A-like [Hyalella azteca]	-	-	-	-	GO:0015630//microtubule cytoskeleton;GO:0031988//membrane-bounded vesicle	GO:0003723//RNA binding;GO:0005515//protein binding	GO:0043623//cellular protein complex assembly
4	ncbi_113803921	snf	2.235686239	1.673913899	0.41749241	5.04E-12	1.35E-07	snf	PREDICTED: U1 small nuclear ribonucleoprotein A [Ceratina calcarata]	-	-	-	-	-	GO:0003676//nucleic acid binding	-
4	ncbi_113819922	MRPL12	0.907886523	0.60925562	0.575464333	6.37E-12	1.70E-07	MRPL12	PREDICTED: 39S ribosomal protein L12, mitochondrial-like [Limulus polyphemus]	Genetic Information Processing	Translation	ko03010//Ribosome	K02935	-	-	-
4	ncbi_113809161	E(z)	1.66908495	0.778631697	1.100044404	1.05E-11	2.81E-07	E(z)	PREDICTED: histone-lysine N-methyltransferase EZH2-like isoform X2 [Hyalella azteca]	Human Diseases;Metabolism	Cancers;Amino acid metabolism	ko05206//MicroRNAs in cancer;ko00310//Lysine degradation	K11430;K11430	-	-	-
4	ncbi_113817269	SF3A3	0.730979704	0.47213152	0.630642548	1.22E-11	3.27E-07	SF3A3	PREDICTED: splicing factor 3A subunit 3 [Dendroctonus ponderosae]	Genetic Information Processing	Transcription	ko03040//Spliceosome	K12827	GO:0043231//intracellular membrane-bounded organelle	GO:0046914//transition metal ion binding	-
4	ncbi_113806677	porin	1.526839876	1.094807041	0.479872152	1.42E-11	3.79E-07	porin	voltage-dependent anion-selective channel [Eriocheir sinensis]	Human Diseases;Human Diseases;Environmental Information Processing;Cellular Processes;Human Diseases;Environmental Information Processing;Cellular Processes;Organismal Systems;Organismal Systems;Cellular Processes	Neurodegenerative diseases;Infectious diseases;Signal transduction;Cell growth and death;Neurodegenerative diseases;Signal transduction;Cell growth and death;Immune system;Digestive system;Cell growth and death	ko05016//Huntington disease;ko05166//HTLV-I infection;ko04022//cGMP - PKG signaling pathway;ko04217//Necroptosis;ko05012//Parkinson disease;ko04020//Calcium signaling pathway;ko04218//Cellular senescence;ko04621//NOD-like receptor signaling pathway;ko04979//Cholesterol metabolism;ko04216//Ferroptosis	K15040;K15040;K15040;K15040;K15040;K15040;K15040;K15040;K15040;K15040	-	GO:0005244//voltage-gated ion channel activity	GO:0006820//anion transport;GO:0034765//regulation of ion transmembrane transport
4	ncbi_113818133	lola	2.214696835	1.18425105	0.903134274	1.78E-11	4.77E-07	lola	PREDICTED: longitudinals lacking protein, isoforms H/M/V-like isoform X3 [Hyalella azteca]	-	-	-	-	-	-	-
4	ncbi_113821133	EF2	2.135701851	1.325963617	0.687669068	2.37E-11	6.35E-07	EF2	elongation factor 2 [Litopenaeus vannamei]	Organismal Systems;Environmental Information Processing	Endocrine system;Signal transduction	ko04921//Oxytocin signaling pathway;ko04152//AMPK signaling pathway	K03234;K03234	-	-	-
4	ncbi_113804663	ncbi_113804663	3.540731424	1.901234658	0.897110808	2.52E-11	6.76E-07	--	PREDICTED: sodium-coupled monocarboxylate transporter 1-like [Hyalella azteca]	-	-	-	-	-	-	-
4	ncbi_113829384	Ubr3	2.292303312	0.806984254	1.506185522	3.09E-11	8.27E-07	Ubr3	PREDICTED: E3 ubiquitin-protein ligase UBR3 isoform X3 [Copidosoma floridanum]	-	-	-	-	-	-	-
4	ncbi_113808115	ncbi_113808115	1.075516929	0.58264423	0.884343104	3.71E-11	9.94E-07	--	AAEL005369-PB [Aedes aegypti]	-	-	-	-	-	-	-
4	ncbi_5333213	ND4	4.2876139	1.923230914	1.156643005	4.37E-11	1.17E-06	ND4	-	-	-	-	-	-	-	-
4	ncbi_113820062	Fut1	0.91263736	0.543510739	0.747733171	4.81E-11	1.29E-06	Fut1	Galactoside 2-alpha-L-fucosyltransferase 2 [Daphnia magna]	Metabolism;Metabolism;Metabolism	Global and overview maps;Glycan biosynthesis and metabolism;Glycan biosynthesis and metabolism	ko01100//Metabolic pathways;ko00601//Glycosphingolipid biosynthesis - lacto and neolacto series;ko00603//Glycosphingolipid biosynthesis - globo and isoglobo series	K00718;K00718;K00718	-	-	-
4	ncbi_113825373	usp10-a	1.292427018	0.664072662	0.960669802	9.51E-11	2.55E-06	usp10-a	PREDICTED: ubiquitin carboxyl-terminal hydrolase 10 [Vollenhovia emeryi]	-	-	-	-	GO:0044424//intracellular part	GO:0070011//peptidase activity, acting on L-amino acid peptides	GO:0006508//proteolysis;GO:0006974//cellular response to DNA damage stimulus;GO:0044248//cellular catabolic process;GO:0044260//cellular macromolecule metabolic process
4	ncbi_113815571	PSME3	0.984037043	0.706907897	0.477190368	1.72E-10	4.61E-06	PSME3	PREDICTED: proteasome activator complex subunit 3-like isoform X2 [Parasteatoda tepidariorum]	Human Diseases;Genetic Information Processing;Organismal Systems	Infectious diseases;Folding, sorting and degradation;Immune system	ko05160//Hepatitis C;ko03050//Proteasome;ko04612//Antigen processing and presentation	K06698;K06698;K06698	-	-	-
4	ncbi_113805895	ncbi_113805895	1.784190486	0.591113215	1.593763271	1.86E-10	4.99E-06	--	PREDICTED: nucleolar transcription factor 1 [Tribolium castaneum]	-	-	-	-	-	-	-
4	ncbi_113826243	Xpo1	1.24045083	0.591904299	1.067428708	2.50E-10	6.68E-06	Xpo1	PREDICTED: exportin-1-like isoform X2 [Hyalella azteca]	Genetic Information Processing;Environmental Information Processing;Human Diseases;Human Diseases;Human Diseases;Genetic Information Processing	Translation;Signal transduction;Infectious diseases;Infectious diseases;Infectious diseases;Translation	ko03013//RNA transport;ko04013//MAPK signaling pathway - fly;ko05164//Influenza A;ko05166//HTLV-I infection;ko05169//Epstein-Barr virus infection;ko03008//Ribosome biogenesis in eukaryotes	K14290;K14290;K14290;K14290;K14290;K14290	-	-	-
4	ncbi_113823947	TNFAIP8	4.229771433	3.185085633	0.409247545	3.10E-10	8.29E-06	TNFAIP8	PREDICTED: tumor necrosis factor alpha-induced protein 8-like protein [Hyalella azteca]	-	-	-	-	-	-	-
4	ncbi_113818566	BRIX1	1.201926234	0.479315857	1.326299781	3.36E-10	8.99E-06	BRIX1	PREDICTED: ribosome biogenesis protein BRX1 homolog [Lingula anatina]	-	-	-	-	-	-	-
4	ncbi_113828430	AAMP	1.373869783	0.479034972	1.520042382	3.93E-10	1.05E-05	AAMP	Angio-associated migratory cell protein [Daphnia magna]	-	-	-	-	-	-	-
4	ncbi_113826178	REXO2	1.817094286	1.327614212	0.452797302	4.50E-10	1.21E-05	REXO2	PREDICTED: oligoribonuclease, mitochondrial-like [Hyalella azteca]	Genetic Information Processing	Translation	ko03008//Ribosome biogenesis in eukaryotes	K13288	GO:0043231//intracellular membrane-bounded organelle	GO:0004527//exonuclease activity;GO:0097159//organic cyclic compound binding	GO:0006139//nucleobase-containing compound metabolic process
4	ncbi_113828234	ncbi_113828234	1.559899711	0.904353865	0.786493978	4.51E-10	1.21E-05	--	PREDICTED: carbohydrate sulfotransferase 1-like [Hyalella azteca]	-	-	-	-	-	-	-
4	ncbi_113830344	ncbi_113830344	1.548083854	0.93028348	0.734741306	5.02E-10	1.34E-05	--	-	-	-	-	-	-	-	-
4	ncbi_113828163	ncbi_113828163	1.187523993	0.827897891	0.520431914	7.37E-10	1.97E-05	--	-	-	-	-	-	-	-	-
4	ncbi_113805265	lsm14a	1.555903155	0.959336265	0.697643764	9.23E-10	2.47E-05	lsm14a	PREDICTED: protein LSM14 homolog B-like isoform X4 [Limulus polyphemus]	-	-	-	-	-	-	-
4	ncbi_113802689	Hirip3	1.52751512	0.923065672	0.726681462	9.35E-10	2.50E-05	Hirip3	PREDICTED: protein starmaker-like [Parasteatoda tepidariorum]	-	-	-	-	-	-	-
4	ncbi_113804525	smc3	2.526018477	1.520880987	0.731957929	1.21E-09	3.25E-05	smc3	PREDICTED: structural maintenance of chromosomes protein 3-like isoform X1 [Hyalella azteca]	Cellular Processes;Cellular Processes	Cell growth and death;Cell growth and death	ko04110//Cell cycle;ko04114//Oocyte meiosis	K06669;K06669	-	-	-
4	ncbi_113800333	CLNS1A	1.164166339	0.779889967	0.577954711	1.31E-09	3.51E-05	CLNS1A	PREDICTED: methylosome subunit pICln [Apis florea]	Genetic Information Processing	Translation	ko03013//RNA transport	K05019	GO:0043234//protein complex;GO:0044444//cytoplasmic part	-	GO:0044699//single-organism process
4	ncbi_113818336	ABCF2	1.625106192	1.105758576	0.555497562	1.34E-09	3.59E-05	ABCF2	PREDICTED: ATP-binding cassette sub-family F member 2 [Agrilus planipennis]	-	-	-	-	-	GO:0017111//nucleoside-triphosphatase activity;GO:0032550//purine ribonucleoside binding	-
4	ncbi_113804384	PPP2R5D	1.231877699	0.682738986	0.851452992	1.39E-09	3.72E-05	PPP2R5D	PREDICTED: serine/threonine-protein phosphatase 2A 56 kDa regulatory subunit gamma isoform isoform X3 [Anoplophora glabripennis]	Human Diseases;Environmental Information Processing;Organismal Systems;Environmental Information Processing;Environmental Information Processing;Genetic Information Processing;Cellular Processes;Organismal Systems	Infectious diseases;Signal transduction;Circulatory system;Signal transduction;Signal transduction;Translation;Cell growth and death;Nervous system	ko05165//Human papillomavirus infection;ko04151//PI3K-Akt signaling pathway;ko04261//Adrenergic signaling in cardiomyocytes;ko04071//Sphingolipid signaling pathway;ko04152//AMPK signaling pathway;ko03015//mRNA surveillance pathway;ko04114//Oocyte meiosis;ko04728//Dopaminergic synapse	K11584;K11584;K11584;K11584;K11584;K11584;K11584;K11584	-	-	-
4	ncbi_113829366	LSM7	1.966971077	1.39305351	0.497725068	1.68E-09	4.50E-05	LSM7	PREDICTED: U6 snRNA-associated Sm-like protein LSm7 [Hyalella azteca]	Genetic Information Processing;Genetic Information Processing	Transcription;Folding, sorting and degradation	ko03040//Spliceosome;ko03018//RNA degradation	K12626;K12626	-	-	-
4	ncbi_113820745	NOP2	2.276318352	0.907516605	1.326706393	1.71E-09	4.57E-05	NOP2	PREDICTED: probable 28S rRNA (cytosine-C(5))-methyltransferase [Limulus polyphemus]	-	-	-	-	-	-	-
4	ncbi_113822742	ncbi_113822742	3.53693596	2.313660818	0.612322717	1.84E-09	4.92E-05	--	-	-	-	-	-	-	-	-
4	ncbi_113799999	ncbi_113799999	2.215794048	0.90957349	1.284561681	1.96E-09	5.25E-05	--	farnesoic acid O-methyltransferase [Nilaparvata lugens]	-	-	-	-	-	-	-
4	ncbi_113809313	ncbi_113809313	1.579820933	1.066426235	0.566976867	4.18E-09	0.000111855	--	PREDICTED: uncharacterized protein LOC108675177 [Hyalella azteca]	-	-	-	-	-	-	-
4	ncbi_113823506	SmE	2.259380016	1.642548362	0.459991096	4.32E-09	0.000115707	SmE	PREDICTED: probable small nuclear ribonucleoprotein E [Hyalella azteca]	Genetic Information Processing	Transcription	ko03040//Spliceosome	K11097	GO:0030529//intracellular ribonucleoprotein complex	-	-
4	ncbi_113821250	ncbi_113821250	1.546431598	0.881651094	0.810663282	6.17E-09	0.000165115	--	PREDICTED: trace amine-associated receptor 7d-like [Takifugu rubripes]	-	-	-	-	-	-	-
4	ncbi_113829873	ncbi_113829873	5.976804162	4.191972207	0.51174512	6.89E-09	0.000184497	--	PREDICTED: RNA-binding protein 4.1-like isoform X3 [Parasteatoda tepidariorum]	-	-	-	-	-	-	-
4	ncbi_113818823	TAF15	2.710179299	1.816224268	0.577445942	7.48E-09	0.000200345	TAF15	PREDICTED: RNA-binding protein cabeza-like isoform X3 [Hyalella azteca]	Human Diseases	Cancers	ko05202//Transcriptional misregulation in cancers	K13098	-	-	-
4	ncbi_113828834	ncbi_113828834	1.639478567	0.681309201	1.266855447	1.01E-08	0.000270357	--	-	-	-	-	-	-	-	-
4	ncbi_113802926	TARDBP	1.628412924	0.88361339	0.88197939	1.16E-08	0.000310947	TARDBP	TAR DNA-binding protein 43 [Zootermopsis nevadensis]	-	-	-	-	-	-	-
4	ncbi_113800167	PIN1	3.127487515	2.304714997	0.440415768	1.34E-08	0.000357906	PIN1	Peptidyl-prolyl cis-trans isomerase NIMA-interacting [Daphnia magna]	Organismal Systems	Immune system	ko04622//RIG-I-like receptor signaling pathway	K09578	-	GO:0016859//cis-trans isomerase activity	-
4	ncbi_113812758	NHP2	2.883402031	1.473836419	0.968195596	1.52E-08	0.000406062	NHP2	PREDICTED: H/ACA ribonucleoprotein complex subunit 2-like protein [Limulus polyphemus]	Genetic Information Processing	Translation	ko03008//Ribosome biogenesis in eukaryotes	K11129	-	-	-
4	ncbi_113811602	eif3l	1.041847987	0.638398122	0.70661648	1.55E-08	0.000415647	eif3l	PREDICTED: eukaryotic translation initiation factor 3 subunit L-like [Hyalella azteca]	-	-	-	-	GO:0070993//translation preinitiation complex	-	GO:0006412//translation
4	ncbi_113817071	SETD2	2.475658496	1.301650682	0.927469986	1.70E-08	0.000456389	SETD2	PREDICTED: microtubule-associated protein futsch-like isoform X2 [Hyalella azteca]	Metabolism	Amino acid metabolism	ko00310//Lysine degradation	K11423	-	-	GO:0009653//anatomical structure morphogenesis;GO:0044238//primary metabolic process;GO:0044260//cellular macromolecule metabolic process;GO:0044763//single-organism cellular process;GO:0048731//system development
4	ncbi_113820764	Yaf2	0.999546097	0.522583415	0.935611763	2.13E-08	0.000570835	Yaf2	PREDICTED: YY1-associated factor 2-like [Hyalella azteca]	-	-	-	-	-	-	-
4	ncbi_113817566	CPIJ010525	5.605880156	3.929200087	0.512705266	3.18E-08	0.00085256	CPIJ010525	PREDICTED: eukaryotic translation initiation factor 3 subunit M [Agrilus planipennis]	-	-	-	-	GO:0070993//translation preinitiation complex	-	GO:0006412//translation
4	ncbi_113812569	DDX39B	1.227155048	0.738320092	0.732999216	3.22E-08	0.000861653	DDX39B	PREDICTED: spliceosome RNA helicase DDX39B-like [Hyalella azteca]	Genetic Information Processing;Human Diseases;Genetic Information Processing;Genetic Information Processing	Translation;Infectious diseases;Transcription;Translation	ko03013//RNA transport;ko05164//Influenza A;ko03040//Spliceosome;ko03015//mRNA surveillance pathway	K12812;K12812;K12812;K12812	GO:0016604//nuclear body;GO:0043234//protein complex;GO:0097525//spliceosomal snRNP complex	GO:0003724//RNA helicase activity;GO:0005515//protein binding;GO:0017069//snRNA binding;GO:0032550//purine ribonucleoside binding;GO:0042623//ATPase activity, coupled	GO:0000077//DNA damage checkpoint;GO:0000377//RNA splicing, via transesterification reactions with bulged adenosine as nucleophile;GO:0006406//mRNA export from nucleus;GO:0022618//ribonucleoprotein complex assembly;GO:0032784//regulation of DNA-templated transcription, elongation
4	ncbi_113826042	PHB2	2.185975055	1.561552495	0.485295869	3.81E-08	0.00101908	PHB2	prohibitin 2 [Penaeus monodon]	-	-	-	-	-	-	-
4	ncbi_113818693	ACP1	0.75598706	0.476573475	0.665662884	4.10E-08	0.001097033	ACP1	PREDICTED: low molecular weight phosphotyrosine protein phosphatase-like [Cimex lectularius]	Metabolism;Cellular Processes;Metabolism;Metabolism	Global and overview maps;Cellular community - eukaryotes;Metabolism of cofactors and vitamins;Metabolism of cofactors and vitamins	ko01100//Metabolic pathways;ko04520//Adherens junction;ko00730//Thiamine metabolism;ko00740//Riboflavin metabolism	K14394;K14394;K14394;K14394	-	-	-
4	ncbi_113826211	eif3k	1.956707516	1.403801938	0.479088721	4.52E-08	0.001210458	eif3k	eukaryotic translation initiation factor 3 subunit 12 [Procambarus clarkii]	-	-	-	-	GO:0043234//protein complex;GO:0070993//translation preinitiation complex	GO:0008135//translation factor activity, RNA binding;GO:0043021//ribonucleoprotein complex binding	GO:0006417//regulation of translation
4	ncbi_113827071	PFDN6	3.587671303	2.77622982	0.369920718	6.31E-08	0.001690163	PFDN6	PREDICTED: prefoldin subunit 6-like [Hyalella azteca]	-	-	-	-	-	-	-
4	ncbi_113805824	usp106	2.867871301	1.970603853	0.541342499	7.39E-08	0.001979172	usp106	Putative RNA-binding protein Luc7-like 2 [Zootermopsis nevadensis]	-	-	-	-	-	-	-
4	ncbi_113814788	Su(var)205	1.062059333	0.565595203	0.909022576	7.54E-08	0.002017725	Su(var)205	PREDICTED: M-phase phosphoprotein 8 isoform X3 [Bactrocera oleae]	Metabolism	Amino acid metabolism	ko00310//Lysine degradation	K11419	-	-	-
4	ncbi_113814737	Aimp1	2.230373823	1.483531225	0.588250241	7.97E-08	0.002133296	Aimp1	PREDICTED: aminoacyl tRNA synthase complex-interacting multifunctional protein 1-like [Hyalella azteca]	-	-	-	-	-	-	-
4	ncbi_113820582	Dohh	0.870484551	0.526182495	0.72625544	1.02E-07	0.002734673	Dohh	PREDICTED: deoxyhypusine hydroxylase-like isoform X1 [Hyalella azteca]	-	-	-	-	-	GO:0016491//oxidoreductase activity	GO:0044710//single-organism metabolic process
4	ncbi_113800382	EIF3F	6.600990119	4.924431731	0.422725188	1.18E-07	0.003166032	EIF3F	PREDICTED: eukaryotic translation initiation factor 3 subunit F-1-like [Hyalella azteca]	Genetic Information Processing	Translation	ko03013//RNA transport	K03249	GO:0070993//translation preinitiation complex	-	GO:0006412//translation
4	ncbi_113811537	MDH2	6.55508789	4.937333199	0.408883115	2.03E-07	0.005449135	MDH2	malate dehydrogenase [Macrobrachium nipponense]	Metabolism;Metabolism;Metabolism;Metabolism;Metabolism;Metabolism	Global and overview maps;Global and overview maps;Carbohydrate metabolism;Amino acid metabolism;Carbohydrate metabolism;Carbohydrate metabolism	ko01100//Metabolic pathways;ko01200//Carbon metabolism;ko00020//Citrate cycle (TCA cycle);ko00270//Cysteine and methionine metabolism;ko00620//Pyruvate metabolism;ko00630//Glyoxylate and dicarboxylate metabolism	K00026;K00026;K00026;K00026;K00026;K00026	-	GO:0016615//malate dehydrogenase activity	GO:0005975//carbohydrate metabolic process;GO:0006101//citrate metabolic process;GO:0043648//dicarboxylic acid metabolic process
4	ncbi_113817412	ncbi_113817412	2.588971452	1.624594057	0.672299785	2.40E-07	0.006418166	--	-	-	-	-	-	-	-	-
4	ncbi_113804131	G3BP2	2.251806091	1.418178258	0.667043715	2.53E-07	0.006774527	G3BP2	PREDICTED: ras GTPase-activating protein-binding protein 2 [Tribolium castaneum]	-	-	-	-	-	-	-
4	ncbi_113810169	ZK1073.1	3.977460426	2.697633792	0.560153063	2.87E-07	0.007688514	ZK1073.1	n-myc downstream regulated [Daphnia magna]	-	-	-	-	-	-	-
4	ncbi_113811594	HGV2	1.610034112	0.912366723	0.819405523	4.10E-07	0.010971139	HGV2	nuclear autoantigenic sperm protein [Litopenaeus vannamei]	-	-	-	-	-	-	-
4	ncbi_113814578	SF3B4	1.334648904	0.73962459	0.851595177	4.53E-07	0.012131262	SF3B4	PREDICTED: splicing factor 3B subunit 4-like [Priapulus caudatus]	Genetic Information Processing	Transcription	ko03040//Spliceosome	K12831	-	GO:0097159//organic cyclic compound binding	-
4	ncbi_5333211	ND5	5.5272705	2.064001909	1.421122914	4.87E-07	0.01304514	ND5	-	-	-	-	-	-	-	-
4	ncbi_113803690	pin4	2.967559782	2.101714922	0.497710099	5.23E-07	0.014004201	pin4	Peptidyl-prolyl cis-trans isomerase NIMA-interacting 4 [Crassostrea gigas]	-	-	-	-	-	-	-
4	ncbi_113800945	RRS1	2.499737763	1.160657255	1.106834752	5.28E-07	0.014144124	RRS1	PREDICTED: ribosome biogenesis regulatory protein homolog [Hyalella azteca]	-	-	-	-	GO:0043231//intracellular membrane-bounded organelle;GO:0043232//intracellular non-membrane-bounded organelle	GO:0003723//RNA binding	GO:0000070//mitotic sister chromatid segregation
4	ncbi_113807093	ncbi_113807093	2.986245617	1.735960166	0.782598988	6.12E-07	0.01637814	--	PREDICTED: serine-rich adhesin for platelets-like [Hyalella azteca]	-	-	-	-	-	-	-
4	ncbi_113819949	sqd	2.724802228	1.903427031	0.517552255	1.03E-06	0.027477141	sqd	PREDICTED: RNA-binding protein squid-like isoform X6 [Hyalella azteca]	Organismal Systems	Development	ko04320//Dorso-ventral axis formation	K03102	-	-	-
4	ncbi_113812044	eif3e	1.255804186	0.748365984	0.746795636	1.12E-06	0.03011318	eif3e	PREDICTED: eukaryotic translation initiation factor 3 subunit E-B-like isoform X2 [Hyalella azteca]	Genetic Information Processing;Human Diseases	Translation;Infectious diseases	ko03013//RNA transport;ko05160//Hepatitis C	K03250;K03250	GO:0016604//nuclear body;GO:0031988//membrane-bounded vesicle;GO:0043234//protein complex;GO:0070993//translation preinitiation complex	GO:0005515//protein binding;GO:0008135//translation factor activity, RNA binding	GO:0006417//regulation of translation;GO:0022618//ribonucleoprotein complex assembly
4	ncbi_113828698	B52	1.742628449	1.149807385	0.599872799	1.14E-06	0.030522301	B52	PREDICTED: serine-arginine protein 55 isoform X11 [Dinoponera quadriceps]	Genetic Information Processing;Human Diseases	Transcription;Infectious diseases	ko03040//Spliceosome;ko05168//Herpes simplex infection	K12893;K12893	-	-	-
4	ncbi_113806028	Fam13a	2.356471866	0.945613906	1.3173053	1.58E-06	0.042433647	Fam13a	PREDICTED: protein FAM13A isoform X1 [Nicrophorus vespilloides]	-	-	-	-	-	-	-
4	ncbi_113827978	ncbi_113827978	3.564941794	2.364200364	0.592526213	1.62E-06	0.043354656	--	hypothetical protein [Nyssomyia neivai]	-	-	-	-	-	-	-
4	ncbi_113828172	Ran	1.581169279	1.160921421	0.445721506	2.26E-06	0.060595507	Ran	Ran protein [Penaeus monodon]	Genetic Information Processing;Human Diseases;Human Diseases;Genetic Information Processing	Translation;Infectious diseases;Infectious diseases;Translation	ko03013//RNA transport;ko05166//HTLV-I infection;ko05169//Epstein-Barr virus infection;ko03008//Ribosome biogenesis in eukaryotes	K07936;K07936;K07936;K07936	GO:0044464//cell part	GO:0017111//nucleoside-triphosphatase activity;GO:0032550//purine ribonucleoside binding	GO:0015031//protein transport;GO:0016482//cytoplasmic transport;GO:0035556//intracellular signal transduction
4	ncbi_113820812	PFDN2	2.517989767	1.693251862	0.572475838	3.91E-06	0.104583786	PFDN2	PREDICTED: prefoldin subunit 2-like [Hyalella azteca]	-	-	-	-	GO:0043231//intracellular membrane-bounded organelle	-	-
4	ncbi_113821987	Csk	2.108773063	1.165346553	0.855644797	1.31E-05	0.351042734	Csk	Tyrosine-protein kinase CSK, partial [Stegodyphus mimosarum]	Human Diseases	Infectious diseases	ko05120//Epithelial cell signaling in Helicobacter pylori infection	K05728	-	-	-
4	ncbi_113826550	ncbi_113826550	1.563904396	0.853353426	0.873937041	1.42E-05	0.381079259	--	-	-	-	-	-	-	-	-
4	ncbi_113826864	ANXA11	1.135176783	0.714688514	0.667530481	1.87E-05	0.499872868	ANXA11	PREDICTED: annexin B9-like isoform X1 [Limulus polyphemus]	-	-	-	-	-	-	-
4	ncbi_113807229	eIF3-S7	4.621124762	2.879695766	0.682327638	2.11E-05	0.565582818	eIF3-S7	PREDICTED: eukaryotic translation initiation factor 3 subunit D-like [Hyalella azteca]	Genetic Information Processing	Translation	ko03013//RNA transport	K03251	GO:0043234//protein complex;GO:0070993//translation preinitiation complex	GO:0008135//translation factor activity, RNA binding	GO:0006417//regulation of translation
4	ncbi_113809143	ncbi_113809143	1.819154154	1.105415996	0.718678406	2.87E-05	0.768634699	--	Zn-finger in Ran binding protein and others domain containing protein [Acanthamoeba castellanii str. Neff] [Acanthamoeba castellanii]	-	-	-	-	-	-	-
4	ncbi_113812178	Tim10	1.631235829	1.002362084	0.70256162	2.96E-05	0.793262892	Tim10	PREDICTED: mitochondrial import inner membrane translocase subunit Tim10-like [Hyalella azteca]	-	-	-	-	-	GO:0043169//cation binding	GO:0006839//mitochondrial transport;GO:0008104//protein localization
4	ncbi_113816012	TOP1	2.840847013	1.605532227	0.823269517	3.61E-05	0.965823704	TOP1	PREDICTED: DNA topoisomerase I, mitochondrial-like isoform X3 [Hyalella azteca]	-	-	-	-	-	-	-
4	ncbi_113809654	ncbi_113809654	1.622379267	0.704583085	1.203269375	4.09E-05	1	--	PREDICTED: proteoglycan 4-like [Hyalella azteca]	-	-	-	-	-	-	-
4	ncbi_113817752	Set	2.436275442	1.628810694	0.580858313	4.31E-05	1	Set	Protein SET [Zootermopsis nevadensis]	-	-	-	-	-	-	GO:0034728//nucleosome organization
4	ncbi_113822476	ncbi_113822476	1.529048529	0.619044883	1.304518278	4.56E-05	1	--	-	-	-	-	-	-	-	-
4	ncbi_113822211	dom	3.2084893	1.780487829	0.849621598	9.55E-05	1	dom	PREDICTED: helicase domino isoform X3 [Orussus abietinus]	-	-	-	-	-	-	-
4	ncbi_113818199	Arpc2	6.990756757	5.293029121	0.401355046	0.000166823	1	Arpc2	PREDICTED: actin-related protein 2/3 complex subunit 2-like [Hyalella azteca]	Cellular Processes;Cellular Processes;Human Diseases;Human Diseases;Human Diseases;Human Diseases;Organismal Systems	Cell motility;Transport and catabolism;Infectious diseases;Infectious diseases;Infectious diseases;Infectious diseases;Immune system	ko04810//Regulation of actin cytoskeleton;ko04144//Endocytosis;ko05130//Pathogenic Escherichia coli infection;ko05131//Shigellosis;ko05132//Salmonella infection;ko05100//Bacterial invasion of epithelial cells;ko04666//Fc gamma R-mediated phagocytosis	K05758;K05758;K05758;K05758;K05758;K05758;K05758	GO:0005856//cytoskeleton	-	GO:0045010//actin nucleation
4	ncbi_113804709	Utp14a	1.291066478	0.652600573	0.98429113	0.000190198	1	Utp14a	GH14745 [Drosophila grimshawi]	Genetic Information Processing	Translation	ko03008//Ribosome biogenesis in eukaryotes	K14567	-	-	-
4	ncbi_113811363	Eif3b	2.623406364	1.660305821	0.659992294	0.000210073	1	Eif3b	PREDICTED: eukaryotic translation initiation factor 3 subunit B-like [Hyalella azteca]	Genetic Information Processing	Translation	ko03013//RNA transport	K03253	-	-	-
4	ncbi_113826815	PPIG	1.450336474	0.706704443	1.037208755	0.000231209	1	PPIG	PREDICTED: peptidyl-prolyl cis-trans isomerase cyp11 isoform X1 [Wasmannia auropunctata]	-	-	-	-	-	-	-
4	ncbi_113822724	Ftsj3	1.552901851	0.646744299	1.263699314	0.000238784	1	Ftsj3	PREDICTED: pre-rRNA processing protein FTSJ3 [Cephus cinctus]	-	-	-	-	-	-	-
4	ncbi_113805409	SelD	1.447895272	0.888498642	0.704515778	0.000304703	1	SelD	selenophosphate synthetase [Cherax destructor]	Metabolism;Metabolism	Global and overview maps;Metabolism of other amino acids	ko01100//Metabolic pathways;ko00450//Selenocompound metabolism	K01008;K01008	-	-	-
4	ncbi_113809115	ncbi_113809115	0.956310034	0.580280613	0.720727683	0.000328007	1	--	-	-	-	-	-	-	-	-
4	ncbi_113826862	Ltv1	0.86334586	0.46264137	0.900044348	0.000461444	1	Ltv1	PREDICTED: protein LTV1 homolog [Wasmannia auropunctata]	-	-	-	-	-	-	-
4	ncbi_113829112	Abce1	1.03716877	0.553008435	0.907277281	0.000464803	1	Abce1	PREDICTED: ATP-binding cassette sub-family E member 1-like [Hyalella azteca]	-	-	-	-	-	GO:0017111//nucleoside-triphosphatase activity;GO:0032550//purine ribonucleoside binding;GO:0051540//metal cluster binding	-
4	ncbi_113813238	G-s-alpha-60A	2.208161862	1.2563845	0.813567878	0.000473461	1	G-s-alpha-60A	G protein s alpha subunit [Litopenaeus vannamei]	Human Diseases;Organismal Systems;Human Diseases;Environmental Information Processing;Human Diseases;Organismal Systems;Organismal Systems;Organismal Systems;Human Diseases;Organismal Systems;Environmental Information Processing;Human Diseases;Human Diseases;Organismal Systems;Environmental Information Processing;Environmental Information Processing;Organismal Systems;Human Diseases;Organismal Sy…	Cancers;Environmental adaptation;Infectious diseases;Signal transduction;Cardiovascular diseases;Immune system;Endocrine system;Digestive system;Substance dependence;Circulatory system;Signal transduction;Infectious diseases;Endocrine and metabolic diseases;Digestive system;Signal transduction;Signal transduction;Endocrine system;Infectious diseases;Circulatory system;Nervous system;Infectious di…	ko05200//Pathways in cancer;ko04714//Thermogenesis;ko05165//Human papillomavirus infection;ko04015//Rap1 signaling pathway;ko05414//Dilated cardiomyopathy (DCM);ko04611//Platelet activation;ko04921//Oxytocin signaling pathway;ko04972//Pancreatic secretion;ko05034//Alcoholism;ko04261//Adrenergic signaling in cardiomyocytes;ko04024//cAMP signaling pathway;ko05110//Vibrio cholerae infection;ko04934/…	K04632;K04632;K04632;K04632;K04632;K04632;K04632;K04632;K04632;K04632;K04632;K04632;K04632;K04632;K04632;K04632;K04632;K04632;K04632;K04632;K04632;K04632;K04632;K04632;K04632;K04632;K04632;K04632;K04632;K04632;K04632;K04632;K04632;K04632;K04632;K04632;K04632;K04632;K04632;K04632;K04632;K04632;K04632;K04632;K04632;K04632;K04632;K04632	-	GO:0017076//purine nucleotide binding;GO:0017111//nucleoside-triphosphatase activity;GO:0032403//protein complex binding;GO:0032550//purine ribonucleoside binding;GO:0060089//molecular transducer activity	GO:0007166//cell surface receptor signaling pathway
4	ncbi_113820250	CEBPB	3.353615602	2.164127472	0.631931855	0.000488979	1	CEBPB	PREDICTED: CCAAT/enhancer-binding protein epsilon-like [Hyalella azteca]	-	-	-	-	-	-	-
4	ncbi_113810854	Cct8	5.179810405	3.612315278	0.519975477	0.000577928	1	Cct8	PREDICTED: T-complex protein 1 subunit theta-like [Hyalella azteca]	-	-	-	-	GO:0044424//intracellular part	GO:0005515//protein binding;GO:0032550//purine ribonucleoside binding	GO:0044267//cellular protein metabolic process
4	ncbi_113821405	RPL26	3.991480614	3.056294073	0.38514064	0.00063866	1	RPL26	ribosomal protein L26 [Penaeus monodon]	Genetic Information Processing	Translation	ko03010//Ribosome	K02898	GO:0044391//ribosomal subunit	-	GO:0010467//gene expression
4	ncbi_113814234	ncbi_113814234	2.147864121	1.454428128	0.562450722	0.000646322	1	--	-	-	-	-	-	-	-	-
4	ncbi_113822795	ncbi_113822795	2.657059608	1.733879581	0.615826887	0.000813528	1	--	farnesoic acid O-methyltransferase [Nilaparvata lugens]	-	-	-	-	-	-	-
4	ncbi_113813708	Caf1	1.084198074	0.663193089	0.709127471	0.001063559	1	Caf1	PREDICTED: probable histone-binding protein Caf1 isoform X2 [Trachymyrmex zeteki]	Cellular Processes	Cell growth and death	ko04218//Cellular senescence	K10752	-	-	-
4	ncbi_113813722	CYPA	1.589593471	0.818088034	0.958329848	0.001295972	1	CYPA	PREDICTED: peptidyl-prolyl cis-trans isomerase A2-like isoform X1 [Hyalella azteca]	Human Diseases;Environmental Information Processing;Human Diseases;Environmental Information Processing;Human Diseases	Neurodegenerative diseases;Signal transduction;Neurodegenerative diseases;Signal transduction;Infectious diseases	ko05016//Huntington disease;ko04022//cGMP - PKG signaling pathway;ko05012//Parkinson disease;ko04020//Calcium signaling pathway;ko05145//Toxoplasmosis	K09565;K09565;K09565;K09565;K09565	-	GO:0016859//cis-trans isomerase activity	GO:0044267//cellular protein metabolic process
4	ncbi_113820532	EIF2S3	4.108194939	3.107904981	0.402562245	0.001595223	1	EIF2S3	translation initiation factor 2 gamma subunit [Oniscus asellus]	Genetic Information Processing	Translation	ko03013//RNA transport	K03242	-	-	-
4	ncbi_113826974	Eif6	0.948961763	0.580979586	0.707862484	0.001715857	1	Eif6	eukaryotic translation initiation factor 6 [Fenneropenaeus chinensis]	Genetic Information Processing	Translation	ko03008//Ribosome biogenesis in eukaryotes	K03264	GO:0005882//intermediate filament;GO:0031988//membrane-bounded vesicle;GO:0043231//intracellular membrane-bounded organelle	GO:0043021//ribonucleoprotein complex binding	GO:0006412//translation;GO:0042255//ribosome assembly
4	ncbi_113814459	ncbi_113814459	4.401354043	2.24582205	0.970703807	0.002532244	1	--	-	-	-	-	-	-	-	-
4	ncbi_113810740	ncbi_113810740	3.988261809	2.973845716	0.423430316	0.003021634	1	--	-	-	-	-	-	-	-	-
4	ncbi_113809388	SLC25A3	6.396182935	4.874656188	0.391910733	0.003158072	1	SLC25A3	PREDICTED: phosphate carrier protein, mitochondrial-like [Hyalella azteca]	-	-	-	-	GO:0019866//organelle inner membrane;GO:0031224//intrinsic component of membrane;GO:0031988//membrane-bounded vesicle	GO:0005515//protein binding	GO:0044763//single-organism cellular process;GO:0051234//establishment of localization
4	ncbi_113820224	Mmp16	2.835635754	1.601133546	0.824578582	0.003204712	1	Mmp16	PREDICTED: matrix metalloproteinase-14-like isoform X1 [Hyalella azteca]	Organismal Systems;Environmental Information Processing;Organismal Systems	Endocrine system;Signal transduction;Endocrine system	ko04928//Parathyroid hormone synthesis, secretion and action;ko04668//TNF signaling pathway;ko04912//GnRH signaling pathway	K07763;K07763;K07763	-	GO:0008233//peptidase activity;GO:0046872//metal ion binding	-
4	ncbi_113812564	AKR1B1	3.197010702	2.257228178	0.502171309	0.00328968	1	AKR1B1	prostaglandin F synthase [Penaeus monodon]	Metabolism;Metabolism;Metabolism;Metabolism;Metabolism;Metabolism	Global and overview maps;Lipid metabolism;Carbohydrate metabolism;Carbohydrate metabolism;Metabolism of cofactors and vitamins;Carbohydrate metabolism	ko01100//Metabolic pathways;ko00561//Glycerolipid metabolism;ko00051//Fructose and mannose metabolism;ko00040//Pentose and glucuronate interconversions;ko00790//Folate biosynthesis;ko00052//Galactose metabolism	K00011;K00011;K00011;K00011;K00011;K00011	-	-	-
4	ncbi_113818096	HNRNP	5.499400932	3.38104107	0.701806928	0.003568526	1	HNRNP	PREDICTED: heterogeneous nuclear ribonucleoprotein A1, A2/B1 homolog, partial [Hyalella azteca]	Genetic Information Processing	Transcription	ko03040//Spliceosome	K12741	-	-	-
4	ncbi_113825686	ccdc43	3.600688671	2.342968102	0.619935551	0.003784034	1	ccdc43	PREDICTED: coiled-coil domain-containing protein 43-like [Hyalella azteca]	-	-	-	-	-	-	-
4	ncbi_113807140	RpL8	13.51272513	10.37137101	0.381712035	0.004246317	1	RpL8	ribosomal protein L8 [Litopenaeus vannamei]	Genetic Information Processing	Translation	ko03010//Ribosome	K02938	-	-	-
