# Supplementary material for: Single-cell RNA sequencing analysis of shrimp immune cells identifies macrophage-like phagocytes
Source: eLife. 2022 Oct 6;11:e80127. doi: 10.7554/eLife.80127 (PMC9584607; doi:10.7554/eLife.80127)
Supplement: Supplementary file 3. [file elife-80127-supp3.csv]

Target_Cluster	Gene ID	Gene Name	Target_Cluster_mean	Other_Cluster_mean	Log2FC	Pvalue	Qvalue	Symbol	Description	KEGG_A_class	KEGG_B_class	Pathway	K_ID	GO Component	GO Function	GO Process
PH1	ncbi_113829902	CCNB3	3.775894441	0.015891207	7.892445957	0	0	CCNB3	PREDICTED: G2/mitotic-specific cyclin-B3-like isoform X2 [Hyalella azteca]	Cellular Processes;Environmental Information Processing;Cellular Processes;Organismal Systems	Cell growth and death;Signal transduction;Cell growth and death;Endocrine system	ko04110//Cell cycle;ko04068//FoxO signaling pathway;ko04218//Cellular senescence;ko04914//Progesterone-mediated oocyte maturation	K21771;K21771;K21771;K21771	-	-	-
PH1	ncbi_113827798	INCENP	0.790380107	0.003649073	7.758872658	0	0	INCENP	PREDICTED: inner centromere protein A-like [Lingula anatina]	-	-	-	-	-	-	-
PH1	ncbi_113805259	PRC1	1.175186461	0.006643383	7.46675577	0	0	PRC1	PREDICTED: protein regulator of cytokinesis 1-like isoform X1 [Lingula anatina]	-	-	-	-	-	-	-
PH1	ncbi_113810803	ncbi_113810803	0.547777825	0.003293304	7.377911311	0	0	--	-	-	-	-	-	-	-	-
PH1	ncbi_113813509	Cenpe	0.791202438	0.005069798	7.28597486	0	0	Cenpe	PREDICTED: centromere-associated protein E-like [Hyalella azteca]	-	-	-	-	-	-	-
PH1	ncbi_113810390	ncbi_113810390	1.168121678	0.007762036	7.233539638	0	0	--	PREDICTED: centromere protein F [Clupea harengus]	-	-	-	-	GO:0044446//intracellular organelle part	-	-
PH1	ncbi_113819387	ASPM	0.530247252	0.003542982	7.225557224	0	0	ASPM	PREDICTED: abnormal spindle-like microcephaly-associated protein homolog isoform X1 [Strongylocentrotus purpuratus]	-	-	-	-	GO:0015630//microtubule cytoskeleton;GO:0044430//cytoskeletal part	-	GO:0007399//nervous system development;GO:0030154//cell differentiation;GO:0050794//regulation of cellular process
PH1	ncbi_113803105	Klp61F	2.130611849	0.014360634	7.213004579	0	0	Klp61F	PREDICTED: kinesin-like protein KIF11 [Hyalella azteca]	-	-	-	-	-	-	-
PH1	ncbi_113821144	h1f0	49.85455331	0.387797664	7.006277352	0	0	h1f0	Histone 1 [Macrobrachium rosenbergii]	-	-	-	-	-	-	-
PH1	ncbi_113809781	ncbi_113809781	2.433715365	0.020284335	6.906650623	0	0	--	-	-	-	-	-	-	-	-
PH1	ncbi_113826652	PBK	0.597949963	0.005957603	6.649149071	0	0	PBK	PREDICTED: lymphokine-activated killer T-cell-originated protein kinase-like [Ciona intestinalis]	-	-	-	-	-	GO:0016301//kinase activity	GO:0016310//phosphorylation;GO:0048519//negative regulation of biological process;GO:0048583//regulation of response to stimulus;GO:0050794//regulation of cellular process;GO:0051716//cellular response to stimulus
PH1	ncbi_113821141	h1f0	28.27347126	0.287839635	6.61803995	0	0	h1f0	Histone 1 [Macrobrachium rosenbergii]	-	-	-	-	-	-	-
PH1	ncbi_113807182	ncbi_113807182	0.736763937	0.007596662	6.599692928	0	0	--	RAC-GTPase activating protein 1 [Penaeus monodon]	-	-	-	-	-	-	-
PH1	ncbi_113820084	ncbi_113820084	3.126158272	0.039271453	6.31476604	0	0	--	PREDICTED: kinetochore protein Spc24-like [Lingula anatina]	-	-	-	-	-	-	-
PH1	ncbi_113823166	ncbi_113823166	1.051726064	0.013988842	6.232338621	0	0	--	PREDICTED: disks large-associated protein 5-like [Hyalella azteca]	-	-	-	-	-	-	-
PH1	ncbi_113827655	Mad2l1	0.641844106	0.008622334	6.218000635	0	0	Mad2l1	Mitotic spindle assembly checkpoint protein MAD2A [Lepeophtheirus salmonis]	Human Diseases;Cellular Processes;Cellular Processes;Organismal Systems	Infectious diseases;Cell growth and death;Cell growth and death;Endocrine system	ko05166//HTLV-I infection;ko04110//Cell cycle;ko04114//Oocyte meiosis;ko04914//Progesterone-mediated oocyte maturation	K02537;K02537;K02537;K02537	-	-	-
PH1	ncbi_113808119	CIT	0.602360271	0.008354725	6.17189048	0	0	CIT	Citron Rho-interacting kinase [Zootermopsis nevadensis]	-	-	-	-	-	-	-
PH1	ncbi_113821142	h1f0	20.42077524	0.288821268	6.143716843	0	0	h1f0	Histone 1 [Macrobrachium rosenbergii]	-	-	-	-	-	-	-
PH1	ncbi_113823276	ncbi_113823276	1.335326832	0.0194633	6.100292752	0	0	--	PREDICTED: chromatin assembly factor 1 subunit A-like [Saccoglossus kowalevskii]	-	-	-	-	-	-	-
PH1	ncbi_113812106	SPDL1	0.559709654	0.008765425	5.996710761	0	0	SPDL1	PREDICTED: protein Spindly-B-like [Hyalella azteca]	-	-	-	-	GO:0005694//chromosome;GO:0044446//intracellular organelle part	-	GO:0007049//cell cycle
PH1	ncbi_113823574	NDC80	1.445206264	0.02271647	5.991392931	0	0	NDC80	PREDICTED: kinetochore protein NDC80 homolog [Hyalella azteca]	-	-	-	-	GO:0043229//intracellular organelle	-	GO:0044763//single-organism cellular process
PH1	ncbi_113800274	Dsp1	12.68067437	0.210587247	5.912069591	0	0	Dsp1	HMGBa [Litopenaeus vannamei]	Cellular Processes;Cellular Processes;Genetic Information Processing	Cell growth and death;Transport and catabolism;Replication and repair	ko04217//Necroptosis;ko04140//Autophagy - animal;ko03410//Base excision repair	K10802;K10802;K10802	-	-	-
PH1	ncbi_113813305	ncbi_113813305	0.961289889	0.016508153	5.863720926	0	0	--	PREDICTED: geminin-like [Hyalella azteca]	-	-	-	-	-	-	GO:0050794//regulation of cellular process
PH1	ncbi_113805080	DEPDC1B	0.506345865	0.008894683	5.831036147	0	0	DEPDC1B	PREDICTED: DEP domain-containing protein 1A-like [Hyalella azteca]	-	-	-	-	-	-	-
PH1	ncbi_113818305	cdk1	3.528090604	0.073229734	5.590314236	0	0	cdk1	Cdc2 [Penaeus monodon]	Human Diseases;Human Diseases;Cellular Processes;Cellular Processes;Human Diseases;Cellular Processes;Cellular Processes;Organismal Systems;Cellular Processes	Cancers;Infectious diseases;Cell growth and death;Cell growth and death;Infectious diseases;Cell growth and death;Cellular community - eukaryotes;Endocrine system;Cell growth and death	ko05203//Viral carcinogenesis;ko05169//Epstein-Barr virus infection;ko04110//Cell cycle;ko04218//Cellular senescence;ko05168//Herpes simplex infection;ko04114//Oocyte meiosis;ko04540//Gap junction;ko04914//Progesterone-mediated oocyte maturation;ko04115//p53 signaling pathway	K02087;K02087;K02087;K02087;K02087;K02087;K02087;K02087;K02087	-	-	-
PH1	ncbi_113811159	Gins1	0.822757687	0.017580128	5.548450089	0	0	Gins1	PREDICTED: DNA replication complex GINS protein PSF1 [Crassostrea gigas]	-	-	-	-	-	-	-
PH1	ncbi_113817925	h1f0	1.823691222	0.041529063	5.456596337	0	0	h1f0	Histone 1 [Macrobrachium rosenbergii]	-	-	-	-	GO:0043229//intracellular organelle	-	-
PH1	ncbi_113803404	ncbi_113803404	3.071897096	0.072354635	5.407900647	0	0	--	PREDICTED: kinetochore protein Spc25-like [Priapulus caudatus]	-	-	-	-	-	-	-
PH1	ncbi_113824558	ncbi_113824558	0.915365141	0.024941991	5.197698792	0	0	--	PREDICTED: immunoglobulin G-binding protein H-like [Hyalella azteca]	-	-	-	-	-	-	-
PH1	ncbi_113818805	HDA6	0.448704341	0.012647617	5.148827609	0	0	HDA6	PREDICTED: histone deacetylase 8-like [Cimex lectularius]	Human Diseases;Human Diseases;Human Diseases	Infectious diseases;Substance dependence;Cancers	ko05165//Human papillomavirus infection;ko05034//Alcoholism;ko05203//Viral carcinogenesis	K11405;K11405;K11405	-	-	-
PH1	ncbi_113826786	ncbi_113826786	1.755240391	0.054634569	5.00571073	0	0	--	corazonin [Macrobrachium rosenbergii]	-	-	-	-	-	-	-
PH1	ncbi_113811263	ncbi_113811263	1.160970651	0.038232233	4.924398212	0	0	--	-	-	-	-	-	-	-	-
PH1	ncbi_113816415	HMMR	0.868480169	0.029942205	4.85824053	0	0	HMMR	PREDICTED: hyaluronan mediated motility receptor-like, partial [Hyalella azteca]	Environmental Information Processing	Signaling molecules and interaction	ko04512//ECM-receptor interaction	K06267	-	-	-
PH1	ncbi_113821143	h1f0-b	91.59283348	3.299632684	4.794857384	0	0	h1f0-b	histone H3 [Exaiptasia pallida]	-	-	-	-	GO:0043229//intracellular organelle	-	-
PH1	ncbi_113829899	ncbi_113829899	3.00580594	0.117361392	4.678722077	0	0	--	PREDICTED: cell division cycle-associated protein 3-like [Hyalella azteca]	-	-	-	-	-	-	-
PH1	ncbi_113830348	ncbi_113830348	1.040782914	0.042046596	4.62953635	0	0	--	PREDICTED: borealin-like [Lingula anatina]	-	-	-	-	-	-	-
PH1	ncbi_113811712	PCNA	5.609898899	0.228740384	4.616191772	0	0	PCNA	proliferating cell nuclear antigen [Litopenaeus vannamei]	Cellular Processes;Human Diseases;Cellular Processes;Human Diseases;Genetic Information Processing;Genetic Information Processing;Genetic Information Processing;Genetic Information Processing	Cellular community - eukaryotes;Infectious diseases;Cell growth and death;Infectious diseases;Replication and repair;Replication and repair;Replication and repair;Replication and repair	ko04530//Tight junction;ko05166//HTLV-I infection;ko04110//Cell cycle;ko05161//Hepatitis B;ko03420//Nucleotide excision repair;ko03410//Base excision repair;ko03030//DNA replication;ko03430//Mismatch repair	K04802;K04802;K04802;K04802;K04802;K04802;K04802;K04802	-	-	-
PH1	ncbi_113802359	ncbi_113802359	0.573024315	0.023413239	4.613199946	0	0	--	PREDICTED: protein MIS12 homolog [Hyalella azteca]	-	-	-	-	-	-	-
PH1	ncbi_113807526	ncbi_113807526	1.750659222	0.076147974	4.52294881	0	0	--	-	-	-	-	-	-	-	-
PH1	ncbi_113813619	ncbi_113813619	1.46655924	0.064616911	4.504379747	0	0	--	-	-	-	-	-	-	-	-
PH1	ncbi_113816635	MPH3	3.017735303	0.140054356	4.429407508	0	0	MPH3	PREDICTED: histone H3-like [Galendromus occidentalis]	Human Diseases;Human Diseases;Human Diseases	Cancers;Substance dependence;Immune diseases	ko05202//Transcriptional misregulation in cancers;ko05034//Alcoholism;ko05322//Systemic lupus erythematosus	K11253;K11253;K11253	-	-	-
PH1	ncbi_113808209	ube2c	1.256836357	0.064607227	4.281957453	0	0	ube2c	PREDICTED: ubiquitin-conjugating enzyme E2 C isoform X1 [Nanorana parkeri]	Genetic Information Processing	Folding, sorting and degradation	ko04120//Ubiquitin mediated proteolysis	K06688	GO:0000152//nuclear ubiquitin ligase complex	GO:0019787//ubiquitin-like protein transferase activity;GO:0032550//purine ribonucleoside binding	GO:0000209//protein polyubiquitination;GO:0000280//nuclear division;GO:0010993//regulation of ubiquitin homeostasis;GO:0043161//proteasome-mediated ubiquitin-dependent protein catabolic process;GO:1903047//mitotic cell cycle process
PH1	ncbi_113817296	ncbi_113817296	1.309870576	0.072123294	4.182815168	0	0	--	PREDICTED: transcription factor Adf-1-like isoform X2 [Cimex lectularius]	-	-	-	-	-	-	-
PH1	ncbi_113822658	CYCE	0.549915289	0.03282878	4.066176339	0	0	CYCE	cyclin E [Penaeus monodon]	Human Diseases;Human Diseases;Environmental Information Processing;Human Diseases;Environmental Information Processing;Human Diseases;Human Diseases;Cellular Processes;Cellular Processes;Human Diseases;Cellular Processes;Human Diseases;Human Diseases;Human Diseases;Human Diseases;Cellular Processes	Cancers;Infectious diseases;Signal transduction;Cancers;Signal transduction;Cancers;Endocrine and metabolic diseases;Cell growth and death;Cell growth and death;Cancers;Cell growth and death;Cancers;Cancers;Infectious diseases;Infectious diseases;Cell growth and death	ko05200//Pathways in cancer;ko05165//Human papillomavirus infection;ko04151//PI3K-Akt signaling pathway;ko05206//MicroRNAs in cancer;ko04391//Hippo signaling pathway -fly;ko05203//Viral carcinogenesis;ko04934//Cushing syndrome;ko04110//Cell cycle;ko04218//Cellular senescence;ko05226//Gastric cancer;ko04114//Oocyte meiosis;ko05215//Prostate cancer;ko05222//Small cell lung cancer;ko05161//Hepatitis…	K06626;K06626;K06626;K06626;K06626;K06626;K06626;K06626;K06626;K06626;K06626;K06626;K06626;K06626;K06626;K06626	-	-	-
PH1	ncbi_113811959	Cks1b	0.688303452	0.042974948	4.001476936	0	0	Cks1b	PREDICTED: cyclin-dependent kinases regulatory subunit [Harpegnathos saltator]	-	-	-	-	-	GO:0019887//protein kinase regulator activity	GO:0001932//regulation of protein phosphorylation;GO:0044763//single-organism cellular process
PH1	ncbi_113829109	His2A	12.6256848	0.803387098	3.974122537	0	0	His2A	PREDICTED: histone H2A-like [Hyalella azteca]	Human Diseases;Cellular Processes;Human Diseases	Substance dependence;Cell growth and death;Immune diseases	ko05034//Alcoholism;ko04217//Necroptosis;ko05322//Systemic lupus erythematosus	K11251;K11251;K11251	GO:0000785//chromatin;GO:0043231//intracellular membrane-bounded organelle	GO:0003676//nucleic acid binding;GO:0046983//protein dimerization activity	GO:0009617//response to bacterium
PH1	ncbi_113810138	ncaph	1.15812227	0.076951127	3.911701308	0	0	ncaph	Condensin complex subunit [Daphnia magna]	-	-	-	-	-	-	-
PH1	ncbi_113824641	Rrm1	0.636197072	0.045365405	3.809809273	0	0	Rrm1	PREDICTED: ribonucleoside-diphosphate reductase large subunit-like [Hyalella azteca]	Metabolism;Metabolism;Metabolism;Metabolism;Metabolism	Global and overview maps;Nucleotide metabolism;Metabolism of other amino acids;Xenobiotics biodegradation and metabolism;Nucleotide metabolism	ko01100//Metabolic pathways;ko00230//Purine metabolism;ko00480//Glutathione metabolism;ko00983//Drug metabolism - other enzymes;ko00240//Pyrimidine metabolism	K10807;K10807;K10807;K10807;K10807	-	GO:0003824//catalytic activity;GO:0032550//purine ribonucleoside binding	GO:0006259//DNA metabolic process;GO:0044710//single-organism metabolic process
PH1	ncbi_113805981	ncbi_113805981	0.525036643	0.038783535	3.75890192	0	0	--	-	-	-	-	-	-	-	-
PH1	ncbi_113804824	banf1	2.170420937	0.16414164	3.724961692	0	0	banf1	Barrier-to-autointegration factor [Daphnia magna]	-	-	-	-	-	-	-
PH1	ncbi_113823353	ncbi_113823353	0.718837312	0.056763049	3.662641316	0	0	--	-	-	-	-	-	-	-	-
PH1	ncbi_113817088	B3GALT1	0.622374343	0.051903965	3.583865924	0	0	B3GALT1	Galactosyl T domain containing protein [Trichuris trichiura]	Metabolism;Metabolism	Global and overview maps;Glycan biosynthesis and metabolism	ko01100//Metabolic pathways;ko00601//Glycosphingolipid biosynthesis - lacto and neolacto series	K07819;K07819	-	-	-
PH1	ncbi_113808628	ncbi_113808628	0.743017431	0.067684512	3.456498399	0	0	--	CTLDcp2 [Macrobrachium nipponense]	-	-	-	-	-	-	-
PH1	ncbi_113814652	ccnd2	1.181894396	0.109265171	3.435195629	0	0	ccnd2	PREDICTED: G1/S-specific cyclin-D2 isoform X1 [Megachile rotundata]	Human Diseases;Human Diseases;Cellular Processes;Environmental Information Processing;Environmental Information Processing;Human Diseases;Human Diseases;Human Diseases;Human Diseases;Cellular Processes;Environmental Information Processing;Environmental Information Processing;Cellular Processes;Human Diseases;Cellular Processes;Organismal Systems;Environmental Information Processing;Environmental …	Cancers;Infectious diseases;Cellular community - eukaryotes;Signal transduction;Signal transduction;Infectious diseases;Cancers;Cancers;Cancers;Cell growth and death;Signal transduction;Signal transduction;Cell growth and death;Infectious diseases;Cell growth and death;Endocrine system;Signal transduction;Signal transduction	ko05200//Pathways in cancer;ko05165//Human papillomavirus infection;ko04510//Focal adhesion;ko04151//PI3K-Akt signaling pathway;ko04390//Hippo signaling pathway;ko05166//HTLV-I infection;ko05202//Transcriptional misregulation in cancers;ko05206//MicroRNAs in cancer;ko05203//Viral carcinogenesis;ko04110//Cell cycle;ko04310//Wnt signaling pathway;ko04068//FoxO signaling pathway;ko04218//Cellular se…	K10151;K10151;K10151;K10151;K10151;K10151;K10151;K10151;K10151;K10151;K10151;K10151;K10151;K10151;K10151;K10151;K10151;K10151	GO:0043231//intracellular membrane-bounded organelle;GO:0044422//organelle part	-	GO:0007049//cell cycle;GO:0050794//regulation of cellular process
PH1	ncbi_113828653	BIRC5	1.570650528	0.149691451	3.391298475	0	0	BIRC5	survivin [Litopenaeus vannamei]	Human Diseases;Cellular Processes;Environmental Information Processing;Human Diseases;Human Diseases;Human Diseases;Cellular Processes	Cancers;Cell growth and death;Signal transduction;Drug resistance;Infectious diseases;Cancers;Cell growth and death	ko05200//Pathways in cancer;ko04210//Apoptosis;ko04390//Hippo signaling pathway;ko01524//Platinum drug resistance;ko05161//Hepatitis B;ko05210//Colorectal cancer;ko04215//Apoptosis - multiple species	K08731;K08731;K08731;K08731;K08731;K08731;K08731	-	-	GO:0044699//single-organism process;GO:0050794//regulation of cellular process
PH1	ncbi_113823945	ncbi_113823945	1.597788734	0.163704407	3.286911596	0	0	--	hemocyte transglutaminase [Litopenaeus vannamei]	-	-	-	-	-	-	-
PH1	ncbi_113816413	ncbi_113816413	0.683931232	0.075467794	3.179918262	0	0	--	PREDICTED: HAUS augmin-like complex subunit 1 [Branchiostoma belcheri]	-	-	-	-	-	-	-
PH1	ncbi_113820666	ncbi_113820666	0.959172348	0.107851099	3.152749193	0	0	--	-	-	-	-	-	-	-	-
PH1	ncbi_113803465	ncbi_113803465	1.052399204	0.118546309	3.150159412	0	0	--	-	-	-	-	-	-	-	-
PH1	ncbi_113806514	DHFR	0.99955093	0.114202789	3.129682193	0	0	DHFR	PREDICTED: dihydrofolate reductase-like isoform X1 [Lingula anatina]	Metabolism;Metabolism;Human Diseases;Metabolism	Global and overview maps;Metabolism of cofactors and vitamins;Drug resistance;Metabolism of cofactors and vitamins	ko01100//Metabolic pathways;ko00790//Folate biosynthesis;ko01523//Antifolate resistance;ko00670//One carbon pool by folate	K00287;K00287;K00287;K00287	-	-	GO:0044710//single-organism metabolic process
PH1	ncbi_113818852	RFC2	0.622879057	0.077084891	3.014432052	0	0	RFC2	PREDICTED: replication factor C subunit 2-like [Limulus polyphemus]	Genetic Information Processing;Genetic Information Processing;Genetic Information Processing	Replication and repair;Replication and repair;Replication and repair	ko03420//Nucleotide excision repair;ko03030//DNA replication;ko03430//Mismatch repair	K10755;K10755;K10755	GO:0005657//replication fork	GO:0032550//purine ribonucleoside binding	GO:0006259//DNA metabolic process
PH1	ncbi_113802071	ncbi_113802071	0.565265096	0.072099926	2.970857924	0	0	--	PREDICTED: protein gar2-like [Habropoda laboriosa]	-	-	-	-	-	-	-
PH1	ncbi_113811157	smc4	1.974334975	0.265318129	2.895571624	0	0	smc4	PREDICTED: structural maintenance of chromosomes protein 4-like [Hyalella azteca]	-	-	-	-	-	-	-
PH1	ncbi_113824769	DEK	1.474374723	0.210905537	2.805434367	0	0	DEK	PREDICTED: protein DEK [Anoplophora glabripennis]	-	-	-	-	-	-	-
PH1	ncbi_113828520	ncbi_113828520	53.57498872	7.918694936	2.758225054	0	0	--	-	-	-	-	-	-	-	-
PH1	ncbi_113823934	TGM1	99.58281636	15.33181851	2.699367993	0	0	TGM1	hemocyte transglutaminase [Litopenaeus vannamei]	-	-	-	-	-	-	-
PH1	ncbi_113803169	ncbi_113803169	0.493959695	0.080446797	2.618286439	0	0	--	-	-	-	-	-	-	-	-
PH1	ncbi_113821424	emc	2.111971555	0.369112036	2.516459717	0	0	emc	PREDICTED: protein extra-macrochaetae-like [Hyalella azteca]	Environmental Information Processing	Signal transduction	ko04350//TGF-beta signaling pathway	K17696	-	-	-
PH1	ncbi_113800422	ncbi_113800422	3.906204515	0.682959301	2.515895973	0	0	--	gill C-type lectin [Marsupenaeus japonicus]	-	-	-	-	-	-	-
PH1	ncbi_113822630	TUB-2	2.329747584	0.409941632	2.506683239	0	0	TUB-2	beta-II tubulin [Homarus americanus]	Cellular Processes;Human Diseases;Cellular Processes	Transport and catabolism;Infectious diseases;Cellular community - eukaryotes	ko04145//Phagosome;ko05130//Pathogenic Escherichia coli infection;ko04540//Gap junction	K07375;K07375;K07375	GO:0015630//microtubule cytoskeleton;GO:0032991//macromolecular complex	GO:0005198//structural molecule activity;GO:0017111//nucleoside-triphosphatase activity;GO:0032550//purine ribonucleoside binding	GO:0043623//cellular protein complex assembly;GO:0044763//single-organism cellular process
PH1	ncbi_113823802	Grik2	0.814230425	0.143483094	2.50455637	0	0	Grik2	PREDICTED: glutamate receptor ionotropic, kainate 2 isoform X1 [Polistes dominula]	-	-	-	-	-	-	-
PH1	ncbi_113814237	ncbi_113814237	53.14179225	9.442436823	2.492615754	0	0	--	PREDICTED: neurogenic locus notch homolog protein 1-like [Hyalella azteca]	-	-	-	-	-	-	-
PH1	ncbi_113802865	ncbi_113802865	22.59288644	4.202268117	2.426628481	0	0	--	-	-	-	-	-	-	-	-
PH1	ncbi_113827542	suv39h2	0.69061601	0.128512903	2.425970564	0	0	suv39h2	PREDICTED: histone-lysine N-methyltransferase Su(var)3-9-like [Hyalella azteca]	Metabolism	Amino acid metabolism	ko00310//Lysine degradation	K11419	-	-	-
PH1	ncbi_113807409	slo	0.725559452	0.136099988	2.414426897	0	0	slo	calcium-activated potassium channel transcript variant 1 [Scylla paramamosain]	Organismal Systems;Environmental Information Processing;Organismal Systems;Organismal Systems;Organismal Systems;Organismal Systems	Digestive system;Signal transduction;Circulatory system;Endocrine system;Digestive system;Endocrine system	ko04972//Pancreatic secretion;ko04022//cGMP - PKG signaling pathway;ko04270//Vascular smooth muscle contraction;ko04924//Renin secretion;ko04970//Salivary secretion;ko04911//Insulin secretion	K04936;K04936;K04936;K04936;K04936;K04936	-	-	-
PH1	ncbi_113808490	RFC5	0.808866456	0.152650728	2.405667063	0	0	RFC5	PREDICTED: replication factor C subunit 5-like [Lingula anatina]	Genetic Information Processing;Genetic Information Processing;Genetic Information Processing	Replication and repair;Replication and repair;Replication and repair	ko03420//Nucleotide excision repair;ko03030//DNA replication;ko03430//Mismatch repair	K10756;K10756;K10756	-	GO:0032550//purine ribonucleoside binding	GO:0006259//DNA metabolic process;GO:0009888//tissue development
PH1	ncbi_113814897	CBX1	5.716668585	1.137045903	2.329884157	0	0	CBX1	PREDICTED: chromobox protein homolog 1-like [Hyalella azteca]	-	-	-	-	-	-	-
PH1	ncbi_113828057	ncbi_113828057	2.781144468	0.55572154	2.323244621	0	0	--	PREDICTED: microtubule-associated protein Jupiter-like isoform X1 [Halyomorpha halys]	-	-	-	-	-	-	-
PH1	ncbi_113812814	PPAF2	4.624406632	0.941876042	2.295659154	0	0	PPAF2	masquerade-like serine proteinase-like protein 3 [Penaeus monodon]	-	-	-	-	-	-	-
PH1	ncbi_113804513	TOP2A	1.007773814	0.208501756	2.273040439	0	0	TOP2A	PREDICTED: DNA topoisomerase 2-alpha-like isoform X3 [Hyalella azteca]	Human Diseases	Drug resistance	ko01524//Platinum drug resistance	K03164	-	-	-
PH1	ncbi_113811702	Igfbp7	248.9215896	53.43676393	2.219786817	0	0	Igfbp7	single insulin-like growth factor-binding domain protein-2 [Cupiennius salei]	-	-	-	-	-	-	-
PH1	ncbi_113809022	ncbi_113809022	4.61072039	0.999771061	2.205322506	0	0	--	-	-	-	-	-	-	-	-
PH1	ncbi_113823977	H2A.F/Z	37.09690691	8.342599993	2.152729923	0	0	H2A.F/Z	PREDICTED: histone H2A.V [Cimex lectularius]	Human Diseases;Cellular Processes;Human Diseases	Substance dependence;Cell growth and death;Immune diseases	ko05034//Alcoholism;ko04217//Necroptosis;ko05322//Systemic lupus erythematosus	K11251;K11251;K11251	GO:0031224//intrinsic component of membrane;GO:0043231//intracellular membrane-bounded organelle;GO:0043232//intracellular non-membrane-bounded organelle	GO:0003676//nucleic acid binding;GO:0043169//cation binding;GO:0046983//protein dimerization activity	-
PH1	ncbi_113819328	Ctrc	1.371392223	0.314300747	2.125423641	0	0	Ctrc	prophenoloxidase activating enzyme [Litopenaeus vannamei]	-	-	-	-	-	-	-
PH1	ncbi_113808957	ncbi_113808957	55.9600257	13.23326991	2.080227033	0	0	--	PREDICTED: neurogenic locus notch homolog protein 1-like [Hyalella azteca]	-	-	-	-	-	-	-
PH1	ncbi_113808099	ncbi_113808099	4.958063019	1.232162816	2.008583705	0	0	--	PREDICTED: late histone H1-like [Neodiprion lecontei]	-	-	-	-	-	-	-
PH1	ncbi_113829827	Rab27a	1.353113072	0.353638164	1.935936522	0	0	Rab27a	Rab27A [Macrobrachium rosenbergii]	-	-	-	-	-	-	-
PH1	ncbi_113825742	Cpa1	1.17297328	0.309419711	1.922533139	0	0	Cpa1	PREDICTED: carboxypeptidase B-like [Hyalella azteca]	-	-	-	-	-	-	-
PH1	ncbi_113823668	ncbi_113823668	4.372726313	1.17094411	1.900860837	0	0	--	hypothetical protein [Triatoma infestans]	-	-	-	-	-	-	-
PH1	ncbi_113804775	ncbi_113804775	4.608941953	1.275397149	1.853489036	0	0	--	Replication protein A 14 kDa subunit [Orchesella cincta]	Genetic Information Processing;Genetic Information Processing;Genetic Information Processing;Genetic Information Processing;Genetic Information Processing	Replication and repair;Replication and repair;Replication and repair;Replication and repair;Replication and repair	ko03460//Fanconi anemia pathway;ko03420//Nucleotide excision repair;ko03440//Homologous recombination;ko03030//DNA replication;ko03430//Mismatch repair	K10740;K10740;K10740;K10740;K10740	-	-	-
PH1	ncbi_113814365	PPAF1	1.866203296	0.587747785	1.666837054	0	0	PPAF1	Chymotrypsin-C [Daphnia magna]	-	-	-	-	-	-	-
PH1	ncbi_113827788	TUBA1A	61.6773389	19.52733454	1.659245484	0	0	TUBA1A	alpha-III tubulin [Homarus americanus]	Cellular Processes;Cellular Processes;Cellular Processes;Human Diseases;Cellular Processes	Transport and catabolism;Cellular community - eukaryotes;Cell growth and death;Infectious diseases;Cellular community - eukaryotes	ko04145//Phagosome;ko04530//Tight junction;ko04210//Apoptosis;ko05130//Pathogenic Escherichia coli infection;ko04540//Gap junction	K07374;K07374;K07374;K07374;K07374	-	-	-
PH1	ncbi_113829035	Anp32a	3.23406883	1.078144477	1.584799864	0	0	Anp32a	PREDICTED: acidic leucine-rich nuclear phosphoprotein 32 family member A-like [Hyalella azteca]	-	-	-	-	-	-	-
PH1	ncbi_113822637	Mgst1	2.962069177	1.014093915	1.546414068	0	0	Mgst1	microsomal prostaglandin E synthase [Penaeus monodon]	Human Diseases;Human Diseases;Human Diseases;Metabolism;Metabolism;Organismal Systems;Human Diseases;Human Diseases;Human Diseases;Metabolism;Metabolism	Cancers;Cancers;Cardiovascular diseases;Metabolism of other amino acids;Xenobiotics biodegradation and metabolism;Aging;Drug resistance;Cancers;Cancers;Xenobiotics biodegradation and metabolism;Xenobiotics biodegradation and metabolism	ko05200//Pathways in cancer;ko05225//Hepatocellular carcinoma;ko05418//Fluid shear stress and atherosclerosis;ko00480//Glutathione metabolism;ko00983//Drug metabolism - other enzymes;ko04212//Longevity regulating pathway - worm;ko01524//Platinum drug resistance;ko05215//Prostate cancer;ko05204//Chemical carcinogenesis;ko00980//Metabolism of xenobiotics by cytochrome P450;ko00982//Drug metabolism …	K00799;K00799;K00799;K00799;K00799;K00799;K00799;K00799;K00799;K00799;K00799	-	-	-
PH1	ncbi_113816496	ncbi_113816496	4.995210797	1.714846933	1.542465754	0	0	--	PREDICTED: serine/arginine-rich splicing factor 3-like [Hyalella azteca]	-	-	-	-	-	-	-
PH1	ncbi_113808730	spp27	75.73698563	26.44358454	1.518080249	0	0	spp27	PREDICTED: upstream activation factor subunit spp27-like, partial [Hyalella azteca]	-	-	-	-	-	-	-
PH1	ncbi_113819937	ncbi_113819937	99.06624899	34.61780284	1.516879466	0	0	--	-	-	-	-	-	-	-	-
PH1	ncbi_113829084	Mgst3	3.460584125	1.212711504	1.512779193	0	0	Mgst3	Microsomal glutathione S-transferase, partial [Daphnia magna]	Human Diseases;Human Diseases;Human Diseases;Metabolism;Metabolism;Organismal Systems;Human Diseases;Human Diseases;Human Diseases;Metabolism;Metabolism	Cancers;Cancers;Cardiovascular diseases;Metabolism of other amino acids;Xenobiotics biodegradation and metabolism;Aging;Drug resistance;Cancers;Cancers;Xenobiotics biodegradation and metabolism;Xenobiotics biodegradation and metabolism	ko05200//Pathways in cancer;ko05225//Hepatocellular carcinoma;ko05418//Fluid shear stress and atherosclerosis;ko00480//Glutathione metabolism;ko00983//Drug metabolism - other enzymes;ko04212//Longevity regulating pathway - worm;ko01524//Platinum drug resistance;ko05215//Prostate cancer;ko05204//Chemical carcinogenesis;ko00980//Metabolism of xenobiotics by cytochrome P450;ko00982//Drug metabolism …	K00799;K00799;K00799;K00799;K00799;K00799;K00799;K00799;K00799;K00799;K00799	-	-	-
PH1	ncbi_113802837	NINJ1	5.57758676	1.956101963	1.511659477	0	0	NINJ1	PREDICTED: ninjurin-1-like [Hyalella azteca]	-	-	-	-	-	-	-
PH1	ncbi_113815403	b4	61.41080196	23.70758738	1.37314359	0	0	b4	PREDICTED: sperm-specific protein PHI-2B/PHI-3-like [Limulus polyphemus]	-	-	-	-	-	-	-
PH1	ncbi_113814993	SMARCC2	4.12691002	1.597897893	1.368886762	0	0	SMARCC2	SWI/SNF complex subunit SMARCC2 [Zootermopsis nevadensis]	Organismal Systems;Human Diseases	Environmental adaptation;Cancers	ko04714//Thermogenesis;ko05225//Hepatocellular carcinoma	K11649;K11649	-	-	-
PH1	ncbi_113810869	Lsm5	4.47202358	1.88447208	1.246767375	0	0	Lsm5	PREDICTED: U6 snRNA-associated Sm-like protein LSm5 [Hyalella azteca]	Genetic Information Processing;Genetic Information Processing	Transcription;Folding, sorting and degradation	ko03040//Spliceosome;ko03018//RNA degradation	K12624;K12624	-	-	-
PH1	ncbi_113804226	ncbi_113804226	6.850736075	2.952235946	1.214450979	0	0	--	PREDICTED: CKLF-like MARVEL transmembrane domain-containing protein 4 [Hyalella azteca]	-	-	-	-	-	-	-
PH1	ncbi_113812061	TSPAN3	14.33903701	6.199338376	1.20976198	0	0	TSPAN3	TSPAN8 [Litopenaeus vannamei]	Human Diseases;Cellular Processes	Cancers;Transport and catabolism	ko05205//Proteoglycans in cancer;ko04142//Lysosome	K06497;K06497	-	-	-
PH1	ncbi_113812825	ncbi_113812825	6.374077417	2.825235226	1.173845552	0	0	--	-	-	-	-	-	-	-	-
PH1	ncbi_113810575	ncbi_113810575	7.455016479	3.305353689	1.173406886	0	0	--	protein spaetzle, partial [Cherax quadricarinatus]	Organismal Systems	Immune system	ko04624//Toll and Imd signaling pathway	K20694	-	-	-
PH1	ncbi_113824615	Tymp	8.68542097	3.853421043	1.172455946	0	0	Tymp	spermatogonial stem-cell renewal factor [Fenneropenaeus chinensis]	Metabolism;Metabolism;Metabolism;Human Diseases	Global and overview maps;Xenobiotics biodegradation and metabolism;Nucleotide metabolism;Cancers	ko01100//Metabolic pathways;ko00983//Drug metabolism - other enzymes;ko00240//Pyrimidine metabolism;ko05219//Bladder cancer	K00758;K00758;K00758;K00758	-	GO:0016763//transferase activity, transferring pentosyl groups	GO:0008152//metabolic process
PH1	ncbi_113800390	FK506-bp2	16.59340393	7.767522011	1.095083538	0	0	FK506-bp2	PREDICTED: peptidyl-prolyl cis-trans isomerase FKBP1A-like [Priapulus caudatus]	-	-	-	-	-	GO:0016859//cis-trans isomerase activity	GO:0044267//cellular protein metabolic process
PH1	ncbi_113805443	H3f3a	63.16640817	29.640834	1.091571498	0	0	H3f3a	PREDICTED: histone H3.3 isoform X1 [Nothobranchius furzeri]	Human Diseases;Human Diseases;Human Diseases	Cancers;Substance dependence;Immune diseases	ko05202//Transcriptional misregulation in cancers;ko05034//Alcoholism;ko05322//Systemic lupus erythematosus	K11253;K11253;K11253	GO:0000786//nucleosome;GO:0031981//nuclear lumen;GO:0031988//membrane-bounded vesicle	GO:0000977//RNA polymerase II regulatory region sequence-specific DNA binding;GO:0031490//chromatin DNA binding;GO:0046983//protein dimerization activity	GO:0001558//regulation of cell growth;GO:0006306//DNA methylation;GO:0006334//nucleosome assembly;GO:0006342//chromatin silencing;GO:0006950//response to stress;GO:0007599//hemostasis;GO:0035556//intracellular signal transduction
PH1	ncbi_113804388	CNN3	8.916332556	4.415180226	1.013978097	0	0	CNN3	Calponin-3 [Daphnia magna]	-	-	-	-	-	-	-
PH1	ncbi_113802307	Srsf7	9.788948942	5.02543358	0.96190589	0	0	Srsf7	PREDICTED: serine/arginine-rich splicing factor 7-like isoform X2 [Nicrophorus vespilloides]	Genetic Information Processing;Human Diseases	Transcription;Infectious diseases	ko03040//Spliceosome;ko05168//Herpes simplex infection	K12896;K12896	-	-	-
PH1	ncbi_113805733	ncbi_113805733	40.73858896	21.20386225	0.942068938	0	0	--	-	-	-	-	-	-	-	-
PH1	ncbi_113819894	GPX2	89.46953389	47.47205625	0.914317959	0	0	GPX2	glutathione peroxidase [Litopenaeus vannamei]	Human Diseases;Metabolism;Organismal Systems;Metabolism;Human Diseases	Neurodegenerative diseases;Metabolism of other amino acids;Endocrine system;Lipid metabolism;Neurodegenerative diseases	ko05016//Huntington disease;ko00480//Glutathione metabolism;ko04918//Thyroid hormone synthesis;ko00590//Arachidonic acid metabolism;ko05014//Amyotrophic lateral sclerosis (ALS)	K00432;K00432;K00432;K00432;K00432	-	-	-
PH1	ncbi_113803561	sqd	12.92060591	7.063570397	0.87120422	0	0	sqd	PREDICTED: RNA-binding protein squid-like isoform X6 [Hyalella azteca]	Organismal Systems	Development	ko04320//Dorso-ventral axis formation	K03102	-	-	-
PH1	ncbi_113804610	ncbi_113804610	141.0997779	98.37004001	0.520424823	0	0	--	PREDICTED: uncharacterized protein LOC108678985 [Hyalella azteca]	-	-	-	-	-	-	-
PH1	ncbi_113812683	ncbi_113812683	2.242444804	0.77670311	1.529637326	7.00E-294	1.87E-289	--	PREDICTED: uncharacterized protein LOC108672531 isoform X1 [Hyalella azteca]	-	-	-	-	-	-	-
PH1	ncbi_113810842	SmD1	5.813783021	2.818225446	1.044690203	1.19E-293	3.19E-289	SmD1	AGAP007246-PA [Anopheles gambiae str. PEST] [Anopheles gambiae]	Genetic Information Processing;Human Diseases	Transcription;Immune diseases	ko03040//Spliceosome;ko05322//Systemic lupus erythematosus	K11087;K11087	GO:0005681//spliceosomal complex;GO:0044444//cytoplasmic part	-	GO:0000377//RNA splicing, via transesterification reactions with bulged adenosine as nucleophile
PH1	ncbi_113805892	ncbi_113805892	0.879032359	0.223051946	1.978536543	5.20E-290	1.39E-285	--	OV-16 antigen [Thelohanellus kitauei]	-	-	-	-	-	-	-
PH1	ncbi_113818060	chrb	1.874552017	0.558721884	1.746343625	2.58E-289	6.91E-285	chrb	PREDICTED: protein scylla-like [Hyalella azteca]	-	-	-	-	-	-	-
PH1	ncbi_113812905	ncbi_113812905	0.665452777	0.110152841	2.594829589	2.02E-285	5.42E-281	--	-	-	-	-	-	-	-	-
PH1	ncbi_113828172	Ran	2.793952894	1.109678137	1.332166415	8.72E-284	2.34E-279	Ran	Ran protein [Penaeus monodon]	Genetic Information Processing;Human Diseases;Human Diseases;Genetic Information Processing	Translation;Infectious diseases;Infectious diseases;Translation	ko03013//RNA transport;ko05166//HTLV-I infection;ko05169//Epstein-Barr virus infection;ko03008//Ribosome biogenesis in eukaryotes	K07936;K07936;K07936;K07936	GO:0044464//cell part	GO:0017111//nucleoside-triphosphatase activity;GO:0032550//purine ribonucleoside binding	GO:0015031//protein transport;GO:0016482//cytoplasmic transport;GO:0035556//intracellular signal transduction
PH1	ncbi_113819995	Hnrnph1	3.992609147	1.589290265	1.328949207	7.49E-282	2.01E-277	Hnrnph1	PREDICTED: heterogeneous nuclear ribonucleoprotein H-like [Hyalella azteca]	-	-	-	-	-	-	-
PH1	ncbi_113812900	pyx	1.267489083	0.380823056	1.734780592	3.15E-280	8.43E-276	pyx	PREDICTED: transient receptor potential cation channel subfamily A member 1-like [Hyalella azteca]	Organismal Systems	Sensory system	ko04750//Inflammatory mediator regulation of TRP channels	K04984	-	-	-
PH1	ncbi_113819352	SHMT1	1.530884069	0.499180493	1.616731571	5.24E-278	1.40E-273	SHMT1	PREDICTED: serine hydroxymethyltransferase, cytosolic-like [Hyalella azteca]	Metabolism;Metabolism;Metabolism;Metabolism;Metabolism;Human Diseases;Metabolism	Global and overview maps;Global and overview maps;Global and overview maps;Amino acid metabolism;Carbohydrate metabolism;Drug resistance;Metabolism of cofactors and vitamins	ko01100//Metabolic pathways;ko01200//Carbon metabolism;ko01230//Biosynthesis of amino acids;ko00260//Glycine, serine and threonine metabolism;ko00630//Glyoxylate and dicarboxylate metabolism;ko01523//Antifolate resistance;ko00670//One carbon pool by folate	K00600;K00600;K00600;K00600;K00600;K00600;K00600	-	GO:0016742//hydroxymethyl-, formyl- and related transferase activity;GO:0043168//anion binding	GO:0006730//one-carbon metabolic process;GO:0009069//serine family amino acid metabolic process
PH1	ncbi_113803921	snf	3.742773044	1.610848109	1.216287103	3.51E-277	9.39E-273	snf	PREDICTED: U1 small nuclear ribonucleoprotein A [Ceratina calcarata]	-	-	-	-	-	GO:0003676//nucleic acid binding	-
PH1	ncbi_113817752	Set	3.525936185	1.589428958	1.14949783	9.40E-274	2.52E-269	Set	Protein SET [Zootermopsis nevadensis]	-	-	-	-	-	-	GO:0034728//nucleosome organization
PH1	ncbi_113823431	Rpa2	1.415024575	0.281670613	2.328746152	2.48E-273	6.65E-269	Rpa2	Replication protein A 32 kDa subunit [Daphnia magna]	Genetic Information Processing;Genetic Information Processing;Genetic Information Processing;Genetic Information Processing;Genetic Information Processing	Replication and repair;Replication and repair;Replication and repair;Replication and repair;Replication and repair	ko03460//Fanconi anemia pathway;ko03420//Nucleotide excision repair;ko03440//Homologous recombination;ko03030//DNA replication;ko03430//Mismatch repair	K10739;K10739;K10739;K10739;K10739	GO:0005634//nucleus;GO:0044427//chromosomal part	GO:0003676//nucleic acid binding;GO:0005515//protein binding	GO:0006281//DNA repair
PH1	ncbi_113803628	SmD3	7.700036472	4.318568099	0.83431224	1.11E-271	2.98E-267	SmD3	small nuclear ribonucleoprotein SM D3 (snRNP core protein D3) (SM-D3)-like protein, partial [Scylla paramamosain]	Genetic Information Processing;Human Diseases	Transcription;Immune diseases	ko03040//Spliceosome;ko05322//Systemic lupus erythematosus	K11088;K11088	-	-	-
PH1	ncbi_113807669	SNRPG	5.593621858	2.796517622	1.000151306	2.22E-268	5.94E-264	SNRPG	small nuclear ribonucleoprotein polypeptide G [Penaeus monodon]	Genetic Information Processing	Transcription	ko03040//Spliceosome	K11099	GO:0005681//spliceosomal complex;GO:0031981//nuclear lumen;GO:0034708//methyltransferase complex;GO:0044423//virion part;GO:0044444//cytoplasmic part;GO:0097525//spliceosomal snRNP complex	GO:0003723//RNA binding;GO:0003824//catalytic activity	GO:0000377//RNA splicing, via transesterification reactions with bulged adenosine as nucleophile;GO:0006353//DNA-templated transcription, termination;GO:0006397//mRNA processing;GO:0022618//ribonucleoprotein complex assembly;GO:0044710//single-organism metabolic process
PH1	ncbi_113808591	ncbi_113808591	0.930654094	0.263616792	1.819802776	1.86E-265	4.97E-261	--	-	-	-	-	-	-	-	-
PH1	ncbi_113816095	TUBB4B	22.93408555	11.66849725	0.974874612	4.66E-261	1.25E-256	TUBB4B	beta-I tubulin [Homarus americanus]	Cellular Processes;Human Diseases;Cellular Processes	Transport and catabolism;Infectious diseases;Cellular community - eukaryotes	ko04145//Phagosome;ko05130//Pathogenic Escherichia coli infection;ko04540//Gap junction	K07375;K07375;K07375	GO:0015630//microtubule cytoskeleton;GO:0032991//macromolecular complex	GO:0005198//structural molecule activity;GO:0017111//nucleoside-triphosphatase activity;GO:0032550//purine ribonucleoside binding	GO:0043623//cellular protein complex assembly;GO:0044763//single-organism cellular process
PH1	ncbi_113811291	FEN1	0.870003632	0.149315149	2.542660876	8.47E-260	2.27E-255	FEN1	PREDICTED: flap endonuclease 1-like [Hyalella azteca]	Genetic Information Processing;Genetic Information Processing;Genetic Information Processing	Replication and repair;Replication and repair;Replication and repair	ko03410//Base excision repair;ko03030//DNA replication;ko03450//Non-homologous end-joining	K04799;K04799;K04799	GO:0031981//nuclear lumen;GO:0043232//intracellular non-membrane-bounded organelle	GO:0003676//nucleic acid binding;GO:0004527//exonuclease activity;GO:0016888//endodeoxyribonuclease activity, producing 5'-phosphomonoesters;GO:0043169//cation binding	GO:0006281//DNA repair;GO:0006308//DNA catabolic process
PH1	ncbi_113822972	Lbr	0.474663283	0.094979609	2.321214732	7.68E-255	2.06E-250	Lbr	PREDICTED: delta(14)-sterol reductase-like [Hyalella azteca]	-	-	-	-	GO:0012505//endomembrane system;GO:0016021//integral component of membrane;GO:0031090//organelle membrane;GO:0031967//organelle envelope;GO:0043231//intracellular membrane-bounded organelle	GO:0005515//protein binding	GO:0006996//organelle organization;GO:0044763//single-organism cellular process
PH1	ncbi_113818096	HNRNP	6.63476056	3.359790209	0.98167325	2.03E-254	5.44E-250	HNRNP	PREDICTED: heterogeneous nuclear ribonucleoprotein A1, A2/B1 homolog, partial [Hyalella azteca]	Genetic Information Processing	Transcription	ko03040//Spliceosome	K12741	-	-	-
PH1	ncbi_113802256	ncbi_113802256	10.70445608	5.945685627	0.848296401	1.47E-253	3.94E-249	--	-	-	-	-	-	-	-	-
PH1	ncbi_113829873	ncbi_113829873	7.836583879	4.131057428	0.923713776	5.73E-253	1.53E-248	--	PREDICTED: RNA-binding protein 4.1-like isoform X3 [Parasteatoda tepidariorum]	-	-	-	-	-	-	-
PH1	ncbi_113812915	ncbi_113812915	1.03390667	0.298438882	1.792598548	4.85E-251	1.30E-246	--	PREDICTED: tethering factor for nuclear proteasome sts1 [Bemisia tabaci]	-	-	-	-	-	-	-
PH1	ncbi_113826646	Cda	18.37914143	11.42906047	0.685362563	1.11E-242	2.98E-238	Cda	Cytidine deaminase, partial [Daphnia magna]	Metabolism;Metabolism;Metabolism	Global and overview maps;Xenobiotics biodegradation and metabolism;Nucleotide metabolism	ko01100//Metabolic pathways;ko00983//Drug metabolism - other enzymes;ko00240//Pyrimidine metabolism	K01489;K01489;K01489	-	-	-
PH1	ncbi_113821990	Atad5	0.711279357	0.102324842	2.797259852	1.69E-239	4.52E-235	Atad5	PREDICTED: ATPase family AAA domain-containing protein 5 isoform X3 [Cercocebus atys]	-	-	-	-	-	-	-
PH1	ncbi_113827978	ncbi_113827978	5.362917109	2.297180594	1.223153675	3.44E-239	9.22E-235	--	hypothetical protein [Nyssomyia neivai]	-	-	-	-	-	-	-
PH1	ncbi_113809508	rps20	69.55807658	51.56743536	0.431757743	5.73E-235	1.53E-230	rps20	40S ribosomal protein S20 [Procambarus clarkii]	Genetic Information Processing	Translation	ko03010//Ribosome	K02969	GO:0044391//ribosomal subunit	GO:0005198//structural molecule activity	GO:0010467//gene expression
PH1	ncbi_113820665	ncbi_113820665	0.816034971	0.20021743	2.027063405	4.95E-234	1.32E-229	--	PREDICTED: antigen KI-67 isoform X1 [Tribolium castaneum]	-	-	-	-	-	-	-
PH1	ncbi_113817433	sgl	0.439259017	0.091175158	2.268359201	4.51E-233	1.21E-228	sgl	AAEL011242-PA [Aedes aegypti]	Metabolism;Metabolism;Metabolism;Metabolism	Global and overview maps;Carbohydrate metabolism;Carbohydrate metabolism;Carbohydrate metabolism	ko01100//Metabolic pathways;ko00520//Amino sugar and nucleotide sugar metabolism;ko00040//Pentose and glucuronate interconversions;ko00053//Ascorbate and aldarate metabolism	K00012;K00012;K00012;K00012	-	GO:0000166//nucleotide binding;GO:0016614//oxidoreductase activity, acting on CH-OH group of donors	GO:0044710//single-organism metabolic process
PH1	ncbi_113817756	ALAD	0.981215681	0.318062291	1.625260951	4.23E-224	1.13E-219	ALAD	Delta-aminolevulinic acid dehydratase [Daphnia magna]	Metabolism;Metabolism	Global and overview maps;Metabolism of cofactors and vitamins	ko01100//Metabolic pathways;ko00860//Porphyrin and chlorophyll metabolism	K01698;K01698	-	-	-
PH1	ncbi_113805339	PGM2	0.851574719	0.250573993	1.764896436	1.08E-219	2.89E-215	PGM2	PREDICTED: glucose 1,6-bisphosphate synthase [Aptenodytes forsteri]	Metabolism;Metabolism;Metabolism;Metabolism;Metabolism;Metabolism;Metabolism	Global and overview maps;Nucleotide metabolism;Carbohydrate metabolism;Carbohydrate metabolism;Carbohydrate metabolism;Carbohydrate metabolism;Carbohydrate metabolism	ko01100//Metabolic pathways;ko00230//Purine metabolism;ko00010//Glycolysis / Gluconeogenesis;ko00520//Amino sugar and nucleotide sugar metabolism;ko00500//Starch and sucrose metabolism;ko00052//Galactose metabolism;ko00030//Pentose phosphate pathway	K15779;K15779;K15779;K15779;K15779;K15779;K15779	-	-	-
PH1	ncbi_113820949	SRSF2	6.444764708	3.52450461	0.870707196	1.78E-214	4.77E-210	SRSF2	Splicing factor, arginine/serine-rich 2 [Zootermopsis nevadensis]	Genetic Information Processing;Human Diseases	Transcription;Infectious diseases	ko03040//Spliceosome;ko05168//Herpes simplex infection	K12891;K12891	-	GO:0097159//organic cyclic compound binding	-
PH1	ncbi_113823550	Sod2	9.342574128	5.115915769	0.868827594	2.63E-211	7.03E-207	Sod2	cytosolic MnSOD [Litopenaeus vannamei]	Human Diseases;Environmental Information Processing;Organismal Systems;Cellular Processes;Environmental Information Processing;Organismal Systems;Organismal Systems	Neurodegenerative diseases;Signal transduction;Aging;Transport and catabolism;Signal transduction;Aging;Aging	ko05016//Huntington disease;ko04013//MAPK signaling pathway - fly;ko04213//Longevity regulating pathway - multiple species;ko04146//Peroxisome;ko04068//FoxO signaling pathway;ko04212//Longevity regulating pathway - worm;ko04211//Longevity regulating pathway - mammal	K04564;K04564;K04564;K04564;K04564;K04564;K04564	-	-	-
PH1	ncbi_113830394	magoh	11.0365583	7.190095947	0.618207417	9.91E-211	2.65E-206	magoh	mago-nashi [Penaeus monodon]	Genetic Information Processing;Genetic Information Processing;Genetic Information Processing	Translation;Transcription;Translation	ko03013//RNA transport;ko03040//Spliceosome;ko03015//mRNA surveillance pathway	K12877;K12877;K12877	-	-	-
PH1	ncbi_113829189	RPE	6.039500516	3.353013717	0.848970854	1.13E-209	3.03E-205	RPE	PREDICTED: ribulose-phosphate 3-epimerase [Crassostrea gigas]	Metabolism;Metabolism;Metabolism;Metabolism;Metabolism	Global and overview maps;Global and overview maps;Global and overview maps;Carbohydrate metabolism;Carbohydrate metabolism	ko01100//Metabolic pathways;ko01200//Carbon metabolism;ko01230//Biosynthesis of amino acids;ko00040//Pentose and glucuronate interconversions;ko00030//Pentose phosphate pathway	K01783;K01783;K01783;K01783;K01783	-	GO:0016857//racemase and epimerase activity, acting on carbohydrates and derivatives;GO:0043169//cation binding	GO:0006739//NADP metabolic process
PH1	ncbi_113824065	SmB	6.394417428	3.642283017	0.811969898	1.43E-209	3.83E-205	SmB	PREDICTED: small nuclear ribonucleoprotein-associated protein B-like [Parasteatoda tepidariorum]	Genetic Information Processing;Human Diseases	Transcription;Immune diseases	ko03040//Spliceosome;ko05322//Systemic lupus erythematosus	K11086;K11086	GO:0005681//spliceosomal complex;GO:0005737//cytoplasm;GO:0016604//nuclear body	-	GO:0000377//RNA splicing, via transesterification reactions with bulged adenosine as nucleophile;GO:0003006//developmental process involved in reproduction;GO:0007051//spindle organization;GO:0044702//single organism reproductive process
PH1	ncbi_113805361	CD63	18.20590583	11.95044547	0.607342125	2.62E-209	7.01E-205	CD63	CD63 antigen [Lepeophtheirus salmonis]	Human Diseases;Cellular Processes	Cancers;Transport and catabolism	ko05205//Proteoglycans in cancer;ko04142//Lysosome	K06497;K06497	-	-	-
PH1	ncbi_113807093	ncbi_113807093	3.503421647	1.730700166	1.017408824	6.65E-204	1.78E-199	--	PREDICTED: serine-rich adhesin for platelets-like [Hyalella azteca]	-	-	-	-	-	-	-
PH1	ncbi_113806425	ncbi_113806425	1.419274566	0.535282935	1.406780148	3.50E-202	9.38E-198	--	-	-	-	-	-	-	-	-
PH1	ncbi_113829366	LSM7	2.806523443	1.361964176	1.043095354	3.24E-201	8.67E-197	LSM7	PREDICTED: U6 snRNA-associated Sm-like protein LSm7 [Hyalella azteca]	Genetic Information Processing;Genetic Information Processing	Transcription;Folding, sorting and degradation	ko03040//Spliceosome;ko03018//RNA degradation	K12626;K12626	-	-	-
PH1	ncbi_113806043	HSP90AA1	26.70629456	11.06267885	1.27147904	5.71E-200	1.53E-195	HSP90AA1	heat shock protein 90 [Palaemon carinicauda]	Human Diseases;Genetic Information Processing;Environmental Information Processing;Human Diseases;Cellular Processes;Human Diseases;Organismal Systems;Organismal Systems;Organismal Systems;Organismal Systems;Organismal Systems;Organismal Systems	Cancers;Folding, sorting and degradation;Signal transduction;Cardiovascular diseases;Cell growth and death;Cancers;Immune system;Endocrine system;Endocrine system;Immune system;Immune system;Immune system	ko05200//Pathways in cancer;ko04141//Protein processing in endoplasmic reticulum;ko04151//PI3K-Akt signaling pathway;ko05418//Fluid shear stress and atherosclerosis;ko04217//Necroptosis;ko05215//Prostate cancer;ko04621//NOD-like receptor signaling pathway;ko04914//Progesterone-mediated oocyte maturation;ko04915//Estrogen signaling pathway;ko04612//Antigen processing and presentation;ko04657//IL-1…	K04079;K04079;K04079;K04079;K04079;K04079;K04079;K04079;K04079;K04079;K04079;K04079	-	-	-
PH1	ncbi_113808371	Ube2n	3.588329775	1.821020951	0.978564962	1.75E-199	4.70E-195	Ube2n	PREDICTED: ubiquitin-conjugating enzyme E2 N [Hyalella azteca]	Genetic Information Processing;Organismal Systems	Folding, sorting and degradation;Immune system	ko04120//Ubiquitin mediated proteolysis;ko04624//Toll and Imd signaling pathway	K10580;K10580	-	GO:0003824//catalytic activity	-
PH1	ncbi_113806630	MBD4	3.079453083	1.50215163	1.0356437	1.16E-198	3.10E-194	MBD4	PREDICTED: methyl-CpG-binding domain protein 4-like [Hyalella azteca]	Genetic Information Processing	Replication and repair	ko03410//Base excision repair	K10801	-	-	GO:0006281//DNA repair
PH1	ncbi_113818649	Pka-R2	3.567468209	1.734854458	1.040085938	6.89E-197	1.85E-192	Pka-R2	PREDICTED: cAMP-dependent protein kinase type II regulatory subunit-like [Hyalella azteca]	-	-	-	-	GO:0044424//intracellular part	GO:0019887//protein kinase regulator activity	GO:0001932//regulation of protein phosphorylation
PH1	ncbi_113817904	Hnrnpul1	1.088749306	0.390897954	1.477807859	9.06E-196	2.43E-191	Hnrnpul1	PREDICTED: heterogeneous nuclear ribonucleoprotein U-like protein 1 [Hyalella azteca]	-	-	-	-	-	-	-
PH1	ncbi_113820819	Hnrnpl	2.650903575	1.231345536	1.106248531	2.89E-194	7.73E-190	Hnrnpl	PREDICTED: heterogeneous nuclear ribonucleoprotein L-like isoform X2 [Hyalella azteca]	-	-	-	-	-	-	-
PH1	ncbi_113803183	PRDX4	5.291506012	2.927143791	0.854184768	6.64E-193	1.78E-188	PRDX4	peroxiredoxin [Litopenaeus vannamei]	Cellular Processes	Cell growth and death	ko04214//Apoptosis - fly	K03386	-	GO:0003824//catalytic activity;GO:0016209//antioxidant activity	GO:0044710//single-organism metabolic process
PH1	ncbi_113810089	HNRNPR	1.37980832	0.582638282	1.243795464	9.17E-193	2.46E-188	HNRNPR	PREDICTED: heterogeneous nuclear ribonucleoprotein R isoform X2 [Monomorium pharaonis]	-	-	-	-	-	-	-
PH1	ncbi_113802160	smc1a	1.684234166	0.653840458	1.365082181	1.63E-192	4.36E-188	smc1a	PREDICTED: structural maintenance of chromosomes protein 1A-like [Hyalella azteca]	Cellular Processes;Cellular Processes	Cell growth and death;Cell growth and death	ko04110//Cell cycle;ko04114//Oocyte meiosis	K06636;K06636	-	-	-
PH1	ncbi_113826864	ANXA11	1.60894586	0.698641185	1.203492184	9.13E-192	2.44E-187	ANXA11	PREDICTED: annexin B9-like isoform X1 [Limulus polyphemus]	-	-	-	-	-	-	-
PH1	ncbi_113803286	ncbi_113803286	16.6195735	11.66159304	0.511118477	1.09E-188	2.91E-184	--	Sex-lethal [Eriocheir sinensis]	-	-	-	-	-	-	-
PH1	ncbi_113819949	sqd	3.583169019	1.875275112	0.934133836	3.73E-187	9.99E-183	sqd	PREDICTED: RNA-binding protein squid-like isoform X6 [Hyalella azteca]	Organismal Systems	Development	ko04320//Dorso-ventral axis formation	K03102	-	-	-
PH1	ncbi_113800514	Dpy30	0.753562574	0.243000065	1.632770617	3.29E-184	8.82E-180	Dpy30	PREDICTED: protein dpy-30 homolog [Limulus polyphemus]	-	-	-	-	-	-	-
PH1	ncbi_113811314	Snrpa1	3.07139065	1.533528635	1.002036915	2.10E-181	5.62E-177	Snrpa1	PREDICTED: U2 small nuclear ribonucleoprotein A', partial [Halyomorpha halys]	Genetic Information Processing	Transcription	ko03040//Spliceosome	K11092	-	-	-
PH1	ncbi_113817337	rnps1-a	2.508843394	1.200071316	1.063902276	7.17E-181	1.92E-176	rnps1-a	PREDICTED: RNA-binding protein with serine-rich domain 1-B-like [Hyalella azteca]	Genetic Information Processing;Genetic Information Processing	Translation;Translation	ko03013//RNA transport;ko03015//mRNA surveillance pathway	K14325;K14325	-	-	-
PH1	ncbi_113800045	ncbi_113800045	5.519989532	3.170098678	0.800137782	9.24E-179	2.47E-174	--	-	-	-	-	-	-	-	-
PH1	ncbi_113822795	ncbi_113822795	3.388246461	1.713361092	0.983709588	2.28E-178	6.11E-174	--	farnesoic acid O-methyltransferase [Nilaparvata lugens]	-	-	-	-	-	-	-
PH1	ncbi_113822976	Cdk2	1.289125322	0.510440211	1.336578632	4.75E-177	1.27E-172	Cdk2	cyclin-dependent kinase 2 [Penaeus monodon]	Human Diseases;Human Diseases;Environmental Information Processing;Human Diseases;Human Diseases;Human Diseases;Cellular Processes;Environmental Information Processing;Cellular Processes;Human Diseases;Human Diseases;Cellular Processes;Human Diseases;Human Diseases;Organismal Systems;Human Diseases;Human Diseases;Cellular Processes	Cancers;Infectious diseases;Signal transduction;Cancers;Infectious diseases;Endocrine and metabolic diseases;Cell growth and death;Signal transduction;Cell growth and death;Cancers;Infectious diseases;Cell growth and death;Cancers;Cancers;Endocrine system;Infectious diseases;Infectious diseases;Cell growth and death	ko05200//Pathways in cancer;ko05165//Human papillomavirus infection;ko04151//PI3K-Akt signaling pathway;ko05203//Viral carcinogenesis;ko05169//Epstein-Barr virus infection;ko04934//Cushing syndrome;ko04110//Cell cycle;ko04068//FoxO signaling pathway;ko04218//Cellular senescence;ko05226//Gastric cancer;ko05168//Herpes simplex infection;ko04114//Oocyte meiosis;ko05215//Prostate cancer;ko05222//Smal…	K02206;K02206;K02206;K02206;K02206;K02206;K02206;K02206;K02206;K02206;K02206;K02206;K02206;K02206;K02206;K02206;K02206;K02206	GO:0000803//sex chromosome;GO:0016604//nuclear body;GO:0043234//protein complex;GO:0044430//cytoskeletal part;GO:0044444//cytoplasmic part;GO:0098687//chromosomal region	GO:0004674//protein serine/threonine kinase activity;GO:0005515//protein binding;GO:0032550//purine ribonucleoside binding;GO:0043169//cation binding	GO:0000280//nuclear division;GO:0006355//regulation of transcription, DNA-templated;GO:0006468//protein phosphorylation;GO:0007264//small GTPase mediated signal transduction;GO:0009628//response to abiotic stimulus;GO:0010038//response to metal ion;GO:0016458//gene silencing;GO:0016570//histone modification;GO:0030001//metal ion transport;GO:0030174//regulation of DNA-dependent DNA replication in…
PH1	ncbi_113800517	ncbi_113800517	1.014280665	0.370056091	1.454641051	4.74E-176	1.27E-171	--	PREDICTED: mitotic-spindle organizing protein 2B [Crassostrea gigas]	-	-	-	-	-	-	-
PH1	ncbi_113813708	Caf1	1.891646801	0.631263778	1.583327865	1.04E-175	2.78E-171	Caf1	PREDICTED: probable histone-binding protein Caf1 isoform X2 [Trachymyrmex zeteki]	Cellular Processes	Cell growth and death	ko04218//Cellular senescence	K10752	-	-	-
PH1	ncbi_113827838	Pka-C1	1.058401557	0.426955562	1.309729262	3.05E-175	8.18E-171	Pka-C1	Aurora kinase B [Daphnia magna]	Human Diseases;Organismal Systems;Human Diseases;Human Diseases;Cellular Processes;Organismal Systems;Human Diseases;Organismal Systems;Human Diseases;Organismal Systems;Environmental Information Processing;Organismal Systems;Human Diseases;Organismal Systems;Environmental Information Processing;Human Diseases;Environmental Information Processing;Human Diseases;Cellular Processes;Human Diseases;H…	Cancers;Environmental adaptation;Infectious diseases;Cancers;Cellular community - eukaryotes;Endocrine system;Cardiovascular diseases;Immune system;Infectious diseases;Endocrine system;Signal transduction;Aging;Substance dependence;Circulatory system;Signal transduction;Cancers;Signal transduction;Infectious diseases;Transport and catabolism;Infectious diseases;Endocrine and metabolic diseases;Di…	ko05200//Pathways in cancer;ko04714//Thermogenesis;ko05165//Human papillomavirus infection;ko05205//Proteoglycans in cancer;ko04530//Tight junction;ko04919//Thyroid hormone signaling pathway;ko05414//Dilated cardiomyopathy (DCM);ko04611//Platelet activation;ko05166//HTLV-I infection;ko04921//Oxytocin signaling pathway;ko04010//MAPK signaling pathway;ko04213//Longevity regulating pathway - multipl…	K04345;K04345;K04345;K04345;K04345;K04345;K04345;K04345;K04345;K04345;K04345;K04345;K04345;K04345;K04345;K04345;K04345;K04345;K04345;K04345;K04345;K04345;K04345;K04345;K04345;K04345;K04345;K04345;K04345;K04345;K04345;K04345;K04345;K04345;K04345;K04345;K04345;K04345;K04345;K04345;K04345;K04345;K04345;K04345;K04345;K04345;K04345;K04345;K04345;K04345;K04345;K04345;K04345;K04345;K04345;K04345;K04345;…	-	GO:0004672//protein kinase activity;GO:0032550//purine ribonucleoside binding	GO:0006464//cellular protein modification process;GO:0006796//phosphate-containing compound metabolic process
PH1	ncbi_113821692	ncbi_113821692	0.867463188	0.331039232	1.389800333	4.93E-171	1.32E-166	--	-	-	-	-	-	-	-	-
PH1	ncbi_113828887	Ars2	3.004810614	1.477769771	1.023852541	1.84E-170	4.92E-166	Ars2	arsenite-resistance protein 2-like protein [Litopenaeus vannamei]	-	-	-	-	-	-	-
PH1	ncbi_113820954	SRSF8	6.887631291	4.290712925	0.682790535	1.34E-169	3.58E-165	SRSF8	PREDICTED: serine/arginine-rich splicing factor 2-like [Hyalella azteca]	Genetic Information Processing;Human Diseases	Transcription;Infectious diseases	ko03040//Spliceosome;ko05168//Herpes simplex infection	K12891;K12891	-	-	-
PH1	ncbi_113800052	stg	3.357227758	1.405102901	1.256594626	9.35E-169	2.50E-164	stg	PREDICTED: M-phase inducer phosphatase-like, partial [Hyalella azteca]	-	-	-	-	-	-	-
PH1	ncbi_113814826	Nfyb	1.64647933	0.730332475	1.172759112	5.36E-168	1.43E-163	Nfyb	PREDICTED: nuclear transcription factor Y subunit B-1-like isoform X1 [Hyalella azteca]	Human Diseases;Human Diseases;Organismal Systems	Infectious diseases;Infectious diseases;Immune system	ko05166//HTLV-I infection;ko05152//Tuberculosis;ko04612//Antigen processing and presentation	K08065;K08065;K08065	-	GO:0005488//binding	-
PH1	ncbi_113828824	eca	6.537269463	4.040638336	0.694104939	1.16E-167	3.11E-163	eca	PREDICTED: transmembrane emp24 domain-containing protein eca [Aedes albopictus]	-	-	-	-	GO:0031224//intrinsic component of membrane	-	-
PH1	ncbi_113804281	Dsp1	6.989476895	4.142318338	0.754746056	1.97E-167	5.28E-163	Dsp1	HMGBb [Litopenaeus vannamei]	Cellular Processes;Cellular Processes;Genetic Information Processing	Cell growth and death;Transport and catabolism;Replication and repair	ko04217//Necroptosis;ko04140//Autophagy - animal;ko03410//Base excision repair	K10802;K10802;K10802	-	GO:0004672//protein kinase activity;GO:0032550//purine ribonucleoside binding	GO:0006464//cellular protein modification process
PH1	ncbi_113804597	LSM3	2.887048162	1.492685497	0.951684948	6.60E-167	1.77E-162	LSM3	U6 snRNA-associated Sm-like protein LSm3 [Xenopus tropicalis]	Genetic Information Processing;Genetic Information Processing	Transcription;Folding, sorting and degradation	ko03040//Spliceosome;ko03018//RNA degradation	K12622;K12622	GO:0005681//spliceosomal complex	-	-
PH1	ncbi_113801008	RS2Z33	8.075325844	5.136397962	0.652763489	9.11E-167	2.44E-162	RS2Z33	PREDICTED: serine/arginine-rich-splicing factor SR34-like isoform X2 [Hyalella azteca]	Genetic Information Processing;Human Diseases	Transcription;Infectious diseases	ko03040//Spliceosome;ko05168//Herpes simplex infection	K12896;K12896	-	-	-
PH1	ncbi_113820651	SRSF1	1.892732938	0.905196	1.064168748	5.19E-165	1.39E-160	SRSF1	TPA_inf: alternative splicing factor ASF/SF2 [Amblyomma variegatum]	Genetic Information Processing;Human Diseases;Organismal Systems	Transcription;Infectious diseases;Immune system	ko03040//Spliceosome;ko05168//Herpes simplex infection;ko04657//IL-17 signaling pathway	K12890;K12890;K12890	-	GO:0097159//organic cyclic compound binding	-
PH1	ncbi_113820197	Agrn	0.752457312	0.292609965	1.362630836	4.89E-164	1.31E-159	Agrn	Agrin [Exaiptasia pallida]	Environmental Information Processing	Signaling molecules and interaction	ko04512//ECM-receptor interaction	K06254	-	-	-
PH1	ncbi_113802708	ncbi_113802708	4.381544509	2.536857272	0.788397161	1.47E-162	3.93E-158	--	PREDICTED: SAP domain-containing ribonucleoprotein [Microplitis demolitor]	-	-	-	-	-	-	-
PH1	ncbi_113806042	HSP90AA1	3.119572788	1.164256794	1.421939171	1.62E-162	4.33E-158	HSP90AA1	heat shock protein 90 [Eriocheir sinensis]	Human Diseases;Genetic Information Processing;Environmental Information Processing;Human Diseases;Cellular Processes;Human Diseases;Organismal Systems;Organismal Systems;Organismal Systems;Organismal Systems;Organismal Systems;Organismal Systems	Cancers;Folding, sorting and degradation;Signal transduction;Cardiovascular diseases;Cell growth and death;Cancers;Immune system;Endocrine system;Endocrine system;Immune system;Immune system;Immune system	ko05200//Pathways in cancer;ko04141//Protein processing in endoplasmic reticulum;ko04151//PI3K-Akt signaling pathway;ko05418//Fluid shear stress and atherosclerosis;ko04217//Necroptosis;ko05215//Prostate cancer;ko04621//NOD-like receptor signaling pathway;ko04914//Progesterone-mediated oocyte maturation;ko04915//Estrogen signaling pathway;ko04612//Antigen processing and presentation;ko04657//IL-1…	K04079;K04079;K04079;K04079;K04079;K04079;K04079;K04079;K04079;K04079;K04079;K04079	-	-	-
PH1	ncbi_113811941	ncbi_113811941	0.858730761	0.326633408	1.394533515	6.50E-162	1.74E-157	--	PREDICTED: mediator of DNA damage checkpoint protein 1-like [Hyalella azteca]	-	-	-	-	-	-	-
PH1	ncbi_113821069	Tmem14c	3.008165125	1.533580774	0.971979606	1.33E-161	3.57E-157	Tmem14c	Transmembrane protein 14C [Daphnia magna]	-	-	-	-	-	-	GO:0050658//RNA transport
PH1	ncbi_113823250	Dnajc9	0.497416613	0.147107922	1.757579756	1.48E-160	3.96E-156	Dnajc9	dnaJ homolog subfamily C member 9 [Mus musculus]	-	-	-	-	GO:0043231//intracellular membrane-bounded organelle	-	GO:0051703//intraspecies interaction between organisms
PH1	ncbi_113809611	Itpkb	0.474744775	0.135189189	1.81217234	4.95E-160	1.33E-155	Itpkb	PREDICTED: inositol-trisphosphate 3-kinase A isoform X3 [Musca domestica]	Metabolism;Environmental Information Processing;Metabolism;Environmental Information Processing	Global and overview maps;Signal transduction;Carbohydrate metabolism;Signal transduction	ko01100//Metabolic pathways;ko04020//Calcium signaling pathway;ko00562//Inositol phosphate metabolism;ko04070//Phosphatidylinositol signaling system	K00911;K00911;K00911;K00911	-	-	-
PH1	ncbi_113830207	ttk	1.051366643	0.43135342	1.285323568	5.07E-160	1.36E-155	ttk	broad-complex-like protein [Macrobrachium nipponense]	-	-	-	-	-	-	-
PH1	ncbi_113827332	Tktl2	5.180634298	3.144265321	0.720405786	5.24E-159	1.40E-154	Tktl2	PREDICTED: transketolase-like isoform X1 [Hyalella azteca]	Metabolism;Metabolism;Metabolism;Metabolism	Global and overview maps;Global and overview maps;Global and overview maps;Carbohydrate metabolism	ko01100//Metabolic pathways;ko01200//Carbon metabolism;ko01230//Biosynthesis of amino acids;ko00030//Pentose phosphate pathway	K00615;K00615;K00615;K00615	-	-	-
PH1	ncbi_113810783	ncbi_113810783	1.273950805	0.484402325	1.395031873	2.34E-157	6.27E-153	--	PREDICTED: zinc finger protein 2 homolog [Hyalella azteca]	-	-	-	-	-	-	-
PH1	ncbi_113828368	PHF19	0.758223106	0.232444039	1.705738993	1.39E-156	3.71E-152	PHF19	Metal-response element-binding transcription factor 2 [Melipona quadrifasciata]	-	-	-	-	-	-	-
PH1	ncbi_113805156	Sec11a	4.533659475	2.728170897	0.732742014	1.89E-156	5.07E-152	Sec11a	PREDICTED: signal peptidase complex catalytic subunit SEC11A [Branchiostoma belcheri]	Genetic Information Processing	Folding, sorting and degradation	ko03060//Protein export	K13280	-	-	-
PH1	ncbi_113815887	RpLP1	117.3925481	89.31386183	0.394384822	7.47E-155	2.00E-150	RpLP1	ribosomal protein P1 [Palaemon varians]	Genetic Information Processing	Translation	ko03010//Ribosome	K02942	GO:0015934//large ribosomal subunit	GO:0005198//structural molecule activity	GO:0010467//gene expression;GO:0034645//cellular macromolecule biosynthetic process
PH1	ncbi_113821594	TIAL1	6.109067879	3.782378532	0.691658518	6.65E-154	1.78E-149	TIAL1	TIA-1-like protein, partial [Scylla paramamosain]	-	-	-	-	-	-	-
PH1	ncbi_113826778	14-3-3epsilon	4.595518796	2.631283271	0.804461169	2.01E-152	5.38E-148	14-3-3epsilon	14-3-3 epsilon-like transcript variant 2 [Litopenaeus vannamei]	Environmental Information Processing;Environmental Information Processing;Environmental Information Processing;Human Diseases;Human Diseases;Cellular Processes;Cellular Processes;Organismal Systems	Signal transduction;Signal transduction;Signal transduction;Cancers;Infectious diseases;Cell growth and death;Cell growth and death;Nervous system	ko04151//PI3K-Akt signaling pathway;ko04390//Hippo signaling pathway;ko04391//Hippo signaling pathway -fly;ko05203//Viral carcinogenesis;ko05169//Epstein-Barr virus infection;ko04110//Cell cycle;ko04114//Oocyte meiosis;ko04722//Neurotrophin signaling pathway	K06630;K06630;K06630;K06630;K06630;K06630;K06630;K06630	-	-	-
PH1	ncbi_113802184	Lsm8	0.929608864	0.363244537	1.355682724	3.73E-152	9.99E-148	Lsm8	PREDICTED: U6 snRNA-associated Sm-like protein LSm8 [Hyalella azteca]	Genetic Information Processing;Genetic Information Processing	Transcription;Folding, sorting and degradation	ko03040//Spliceosome;ko03018//RNA degradation	K12627;K12627	GO:0032991//macromolecular complex	-	-
PH1	ncbi_113829326	RPS16	50.22656819	39.17380745	0.358561348	5.10E-152	1.37E-147	RPS16	PREDICTED: 40S ribosomal protein S16 [Lepisosteus oculatus]	Genetic Information Processing	Translation	ko03010//Ribosome	K02960	GO:0005924//cell-substrate adherens junction;GO:0015935//small ribosomal subunit;GO:0031988//membrane-bounded vesicle	GO:0003723//RNA binding;GO:0005198//structural molecule activity	GO:0010467//gene expression;GO:0016072//rRNA metabolic process;GO:0042254//ribosome biogenesis
PH1	ncbi_113814788	Su(var)205	1.205079055	0.566475261	1.089042934	7.51E-152	2.01E-147	Su(var)205	PREDICTED: M-phase phosphoprotein 8 isoform X3 [Bactrocera oleae]	Metabolism	Amino acid metabolism	ko00310//Lysine degradation	K11419	-	-	-
PH1	ncbi_113828829	cam	8.571950512	5.374295904	0.673547764	6.08E-151	1.63E-146	cam	calmodulin B [Litopenaeus vannamei]	Human Diseases;Environmental Information Processing;Organismal Systems;Organismal Systems;Human Diseases;Human Diseases;Human Diseases;Environmental Information Processing;Organismal Systems;Environmental Information Processing;Environmental Information Processing;Organismal Systems;Organismal Systems;Human Diseases;Environmental Information Processing;Cellular Processes;Human Diseases;Cellular P…	Cancers;Signal transduction;Sensory system;Endocrine system;Cardiovascular diseases;Neurodegenerative diseases;Substance dependence;Signal transduction;Circulatory system;Signal transduction;Signal transduction;Digestive system;Endocrine system;Infectious diseases;Signal transduction;Cell growth and death;Infectious diseases;Cell growth and death;Circulatory system;Nervous system;Signal transduct…	ko05200//Pathways in cancer;ko04015//Rap1 signaling pathway;ko04745//Phototransduction - fly;ko04921//Oxytocin signaling pathway;ko05418//Fluid shear stress and atherosclerosis;ko05010//Alzheimer disease;ko05034//Alcoholism;ko04022//cGMP - PKG signaling pathway;ko04261//Adrenergic signaling in cardiomyocytes;ko04024//cAMP signaling pathway;ko04014//Ras signaling pathway;ko04971//Gastric acid secr…	K02183;K02183;K02183;K02183;K02183;K02183;K02183;K02183;K02183;K02183;K02183;K02183;K02183;K02183;K02183;K02183;K02183;K02183;K02183;K02183;K02183;K02183;K02183;K02183;K02183;K02183;K02183;K02183;K02183;K02183;K02183;K02183;K02183;K02183;K02183;K02183;K02183;K02183;K02183;K02183	-	-	-
PH1	ncbi_113826784	ncbi_113826784	1.782848359	0.79151467	1.171496005	1.40E-148	3.75E-144	--	PREDICTED: ankyrin-3-like isoform X4 [Lingula anatina]	-	-	-	-	-	-	-
PH1	ncbi_113813084	Lam	1.577959586	0.703812298	1.164797627	1.15E-147	3.07E-143	Lam	PREDICTED: lamin Dm0 isoform X2 [Cerapachys biroi]	Cellular Processes;Cellular Processes	Cell growth and death;Cell growth and death	ko04210//Apoptosis;ko04214//Apoptosis - fly	K07611;K07611	-	-	-
PH1	ncbi_113819053	GI22153	0.937858353	0.358822733	1.386098752	4.75E-146	1.27E-141	GI22153	PREDICTED: adenylosuccinate synthetase isozyme 1 B-like [Hyalella azteca]	Metabolism;Metabolism;Metabolism	Global and overview maps;Nucleotide metabolism;Amino acid metabolism	ko01100//Metabolic pathways;ko00230//Purine metabolism;ko00250//Alanine, aspartate and glutamate metabolism	K01939;K01939;K01939	-	-	-
PH1	ncbi_113808556	ncbi_113808556	0.548400504	0.187724094	1.546616067	2.09E-145	5.59E-141	--	PREDICTED: trihelix transcription factor GTL1-like [Scleropages formosus]	-	-	-	-	-	-	-
PH1	ncbi_113828698	B52	2.193308753	1.137529162	0.947205384	3.04E-145	8.14E-141	B52	PREDICTED: serine-arginine protein 55 isoform X11 [Dinoponera quadriceps]	Genetic Information Processing;Human Diseases	Transcription;Infectious diseases	ko03040//Spliceosome;ko05168//Herpes simplex infection	K12893;K12893	-	-	-
PH1	ncbi_113819668	ncbi_113819668	2.012654611	1.012914143	0.990587722	3.22E-141	8.61E-137	--	-	-	-	-	-	-	-	-
PH1	ncbi_113815521	PMP2	2.47862061	1.524607367	0.70109971	3.11E-140	8.34E-136	PMP2	intracellular fatty acid-binding protein [Litopenaeus vannamei]	Organismal Systems	Endocrine system	ko03320//PPAR signaling pathway	K08752	-	-	-
PH1	ncbi_113804343	ncbi_113804343	0.657214821	0.240277462	1.451663683	9.48E-140	2.54E-135	--	-	-	-	-	-	-	-	-
PH1	ncbi_113802926	TARDBP	1.690275416	0.892205159	0.921810946	1.50E-139	4.01E-135	TARDBP	TAR DNA-binding protein 43 [Zootermopsis nevadensis]	-	-	-	-	-	-	-
PH1	ncbi_113813430	Taldo1	4.736854983	2.996938429	0.660440061	4.05E-139	1.08E-134	Taldo1	PREDICTED: transaldolase-like [Hyalella azteca]	Metabolism;Metabolism;Metabolism;Metabolism	Global and overview maps;Global and overview maps;Global and overview maps;Carbohydrate metabolism	ko01100//Metabolic pathways;ko01200//Carbon metabolism;ko01230//Biosynthesis of amino acids;ko00030//Pentose phosphate pathway	K00616;K00616;K00616;K00616	GO:0044424//intracellular part	GO:0016744//transferase activity, transferring aldehyde or ketonic groups	GO:0006739//NADP metabolic process
PH1	ncbi_113804683	cdc-37	2.498490865	1.302291959	0.940004022	1.81E-138	4.83E-134	cdc-37	PREDICTED: hsp90 co-chaperone Cdc37 [Vollenhovia emeryi]	Environmental Information Processing	Signal transduction	ko04151//PI3K-Akt signaling pathway	K09554	-	GO:0005515//protein binding;GO:0030295//protein kinase activator activity	GO:0007167//enzyme linked receptor protein signaling pathway;GO:0030154//cell differentiation;GO:0043410//positive regulation of MAPK cascade;GO:0046578//regulation of Ras protein signal transduction
PH1	ncbi_113819755	snRNP-U1-70K	0.810949796	0.345240453	1.232011083	2.12E-138	5.67E-134	snRNP-U1-70K	PREDICTED: U1 small nuclear ribonucleoprotein 70 kDa-like [Hyalella azteca]	Genetic Information Processing	Transcription	ko03040//Spliceosome	K11093	-	-	-
PH1	ncbi_113812043	SKP1	9.768053692	6.906149847	0.500189493	2.32E-138	6.21E-134	SKP1	S-phase kinase-associated protein 1 [Eriocheir sinensis]	Human Diseases;Genetic Information Processing;Genetic Information Processing;Cellular Processes;Environmental Information Processing;Human Diseases;Cellular Processes;Environmental Information Processing;Environmental Information Processing;Organismal Systems	Cancers;Folding, sorting and degradation;Folding, sorting and degradation;Cell growth and death;Signal transduction;Infectious diseases;Cell growth and death;Signal transduction;Signal transduction;Environmental adaptation	ko05200//Pathways in cancer;ko04141//Protein processing in endoplasmic reticulum;ko04120//Ubiquitin mediated proteolysis;ko04110//Cell cycle;ko04310//Wnt signaling pathway;ko05168//Herpes simplex infection;ko04114//Oocyte meiosis;ko04350//TGF-beta signaling pathway;ko04341//Hedgehog signaling pathway - fly;ko04710//Circadian rhythm	K03094;K03094;K03094;K03094;K03094;K03094;K03094;K03094;K03094;K03094	-	GO:0016772//transferase activity, transferring phosphorus-containing groups	GO:0006796//phosphate-containing compound metabolic process
PH1	ncbi_113803030	caz	2.043324076	1.016440228	1.007392658	2.39E-137	6.40E-133	caz	PREDICTED: RNA-binding protein cabeza-like isoform X2 [Hyalella azteca]	Human Diseases	Cancers	ko05202//Transcriptional misregulation in cancers	K13098	-	-	-
PH1	ncbi_113805128	BRD2	2.050906317	1.075026073	0.931889942	4.84E-136	1.30E-131	BRD2	PREDICTED: bromodomain-containing protein 3-like [Hyalella azteca]	-	-	-	-	-	-	-
PH1	ncbi_113827288	bcl7a	1.505184099	0.695839121	1.113114256	1.02E-135	2.74E-131	bcl7a	PREDICTED: B-cell CLL/lymphoma 7 protein family member A-like [Hyalella azteca]	-	-	-	-	-	-	-
PH1	ncbi_113820327	eIF1	8.938196374	5.985169434	0.578591652	1.09E-135	2.93E-131	eIF1	PREDICTED: protein translation factor SUI1 homolog [Hyalella azteca]	Genetic Information Processing	Translation	ko03013//RNA transport	K03113	-	-	GO:0006412//translation
PH1	ncbi_113828369	ncbi_113828369	1.188795924	0.493909999	1.267180995	1.38E-134	3.70E-130	--	PREDICTED: LOW QUALITY PROTEIN: nuclear fragile X mental retardation-interacting protein 1 [Acromyrmex echinatior]	-	-	-	-	-	-	-
PH1	ncbi_113823330	gsp-2	7.844313967	5.317833715	0.560808614	5.10E-134	1.37E-129	gsp-2	Serine/threonine-protein phosphatase alpha-1 isoform [Trachymyrmex zeteki]	Cellular Processes;Human Diseases;Cellular Processes;Environmental Information Processing;Organismal Systems;Organismal Systems;Human Diseases;Environmental Information Processing;Organismal Systems;Environmental Information Processing;Organismal Systems;Cellular Processes;Human Diseases;Genetic Information Processing;Cellular Processes;Organismal Systems;Human Diseases;Organismal Systems;Organis…	Cellular community - eukaryotes;Cancers;Cell motility;Signal transduction;Immune system;Endocrine system;Substance dependence;Signal transduction;Circulatory system;Signal transduction;Endocrine system;Cell growth and death;Infectious diseases;Translation;Cell growth and death;Circulatory system;Endocrine and metabolic diseases;Sensory system;Nervous system;Nervous system;Substance dependence	ko04510//Focal adhesion;ko05205//Proteoglycans in cancer;ko04810//Regulation of actin cytoskeleton;ko04390//Hippo signaling pathway;ko04611//Platelet activation;ko04921//Oxytocin signaling pathway;ko05034//Alcoholism;ko04022//cGMP - PKG signaling pathway;ko04261//Adrenergic signaling in cardiomyocytes;ko04024//cAMP signaling pathway;ko04910//Insulin signaling pathway;ko04218//Cellular senescence;…	K06269;K06269;K06269;K06269;K06269;K06269;K06269;K06269;K06269;K06269;K06269;K06269;K06269;K06269;K06269;K06269;K06269;K06269;K06269;K06269;K06269	-	-	-
PH1	ncbi_113830349	Zbtb8a	0.520431506	0.177477915	1.552068789	8.28E-134	2.22E-129	Zbtb8a	PREDICTED: zinc finger protein 62-like [Hyalella azteca]	-	-	-	-	-	-	-
PH1	ncbi_113814459	ncbi_113814459	4.12146477	2.292541862	0.846209085	1.26E-133	3.36E-129	--	-	-	-	-	-	-	-	-
PH1	ncbi_113818890	Sf3b5	1.893041683	0.993656391	0.929887222	1.76E-130	4.72E-126	Sf3b5	PREDICTED: probable splicing factor 3B subunit 5 [Hyalella azteca]	Genetic Information Processing	Transcription	ko03040//Spliceosome	K12832	-	-	-
PH1	ncbi_113804843	CENPX	0.416009057	0.137813177	1.593901103	4.08E-130	1.09E-125	CENPX	PREDICTED: centromere protein X [Strongylocentrotus purpuratus]	Genetic Information Processing	Replication and repair	ko03460//Fanconi anemia pathway	K15360	GO:0000775//chromosome, centromeric region;GO:0043231//intracellular membrane-bounded organelle;GO:0043234//protein complex	GO:0003677//DNA binding	GO:0006259//DNA metabolic process;GO:0006974//cellular response to DNA damage stimulus;GO:0006996//organelle organization;GO:0007049//cell cycle
PH1	ncbi_113805672	MBD2	1.059040173	0.475842606	1.154200958	4.60E-129	1.23E-124	MBD2	Methyl-CpG-binding domain protein 2 [Zootermopsis nevadensis]	-	-	-	-	GO:0043231//intracellular membrane-bounded organelle	-	-
PH1	ncbi_113819369	Lsm2	2.739738516	1.600457401	0.775553929	3.04E-128	8.15E-124	Lsm2	PREDICTED: U6 snRNA-associated Sm-like protein LSm2 isoform X3 [Hyalella azteca]	Genetic Information Processing;Genetic Information Processing	Transcription;Folding, sorting and degradation	ko03040//Spliceosome;ko03018//RNA degradation	K12621;K12621	GO:0005681//spliceosomal complex;GO:0031981//nuclear lumen;GO:0044444//cytoplasmic part	GO:0017016//Ras GTPase binding;GO:0017069//snRNA binding;GO:0019900//kinase binding	GO:0000291//nuclear-transcribed mRNA catabolic process, exonucleolytic;GO:0000377//RNA splicing, via transesterification reactions with bulged adenosine as nucleophile
PH1	ncbi_113824907	gata3	1.151369552	0.541289224	1.088879394	1.02E-125	2.72E-121	gata3	GATA-binding protein 6, partial [Microtus levis]	Organismal Systems;Organismal Systems;Organismal Systems;Human Diseases	Endocrine system;Immune system;Immune system;Immune diseases	ko04928//Parathyroid hormone synthesis, secretion and action;ko04658//Th1 and Th2 cell differentiation;ko04659//Th17 cell differentiation;ko05321//Inflammatiory bowel disease (IBD)	K17895;K17895;K17895;K17895	GO:0031981//nuclear lumen;GO:0044798//nuclear transcription factor complex	GO:0000977//RNA polymerase II regulatory region sequence-specific DNA binding;GO:0000981//RNA polymerase II transcription factor activity, sequence-specific DNA binding;GO:0003712//transcription cofactor activity;GO:0008134//transcription factor binding;GO:0046332//SMAD binding;GO:0046872//metal ion binding	GO:0001819//positive regulation of cytokine production;GO:0002065//columnar/cuboidal epithelial cell differentiation;GO:0003143//embryonic heart tube morphogenesis;GO:0003208//cardiac ventricle morphogenesis;GO:0006950//response to stress;GO:0007369//gastrulation;GO:0007599//hemostasis;GO:0008406//gonad development;GO:0009952//anterior/posterior pattern specification;GO:0014896//muscle hypertroph…
PH1	ncbi_113813525	NSD2	0.729796043	0.227411087	1.682190735	1.09E-125	2.92E-121	NSD2	PREDICTED: LOW QUALITY PROTEIN: histone-lysine N-methyltransferase NSD2-like [Limulus polyphemus]	Human Diseases;Metabolism	Cancers;Amino acid metabolism	ko05202//Transcriptional misregulation in cancers;ko00310//Lysine degradation	K11424;K11424	GO:0005634//nucleus	-	GO:0019219//regulation of nucleobase-containing compound metabolic process;GO:0044260//cellular macromolecule metabolic process;GO:0044710//single-organism metabolic process;GO:0044763//single-organism cellular process;GO:0048513//animal organ development;GO:0060255//regulation of macromolecule metabolic process;GO:0090304//nucleic acid metabolic process
PH1	ncbi_113800639	nup35	0.479491842	0.176129778	1.44486742	7.66E-125	2.05E-120	nup35	PREDICTED: nucleoporin NUP53 isoform X1 [Gallus gallus]	Genetic Information Processing	Translation	ko03013//RNA transport	K14313	GO:0043229//intracellular organelle	-	-
PH1	ncbi_113824578	KIWI	1.630017632	0.798077757	1.03028635	3.31E-124	8.86E-120	KIWI	RNA polymerase II transcriptional coactivator [Daphnia magna]	-	-	-	-	-	-	-
PH1	ncbi_113799939	SERPINB1	3.122425912	1.822191464	0.776992784	5.93E-124	1.59E-119	SERPINB1	serine proteinase inhibitor-3 [Eriocheir sinensis]	Human Diseases	Infectious diseases	ko05146//Amoebiasis	K13963	-	-	-
PH1	ncbi_113826550	ncbi_113826550	1.629681087	0.861228254	0.920122114	8.69E-124	2.33E-119	--	-	-	-	-	-	-	-	-
PH1	ncbi_113818194	Polr2d	0.506304879	0.185376193	1.449550412	3.17E-123	8.49E-119	Polr2d	PREDICTED: DNA-directed RNA polymerase II 16 kDa polypeptide-like [Hyalella azteca]	Metabolism;Human Diseases;Metabolism;Human Diseases;Metabolism;Genetic Information Processing	Global and overview maps;Neurodegenerative diseases;Nucleotide metabolism;Infectious diseases;Nucleotide metabolism;Transcription	ko01100//Metabolic pathways;ko05016//Huntington disease;ko00230//Purine metabolism;ko05169//Epstein-Barr virus infection;ko00240//Pyrimidine metabolism;ko03020//RNA polymerase	K03012;K03012;K03012;K03012;K03012;K03012	GO:0044464//cell part	GO:0034062//RNA polymerase activity;GO:0097159//organic cyclic compound binding	GO:0034645//cellular macromolecule biosynthetic process
PH1	ncbi_113805409	SelD	1.666966746	0.886731966	0.910655335	1.23E-122	3.30E-118	SelD	selenophosphate synthetase [Cherax destructor]	Metabolism;Metabolism	Global and overview maps;Metabolism of other amino acids	ko01100//Metabolic pathways;ko00450//Selenocompound metabolism	K01008;K01008	-	-	-
PH1	ncbi_113807316	ncbi_113807316	0.468162299	0.176823634	1.404697644	4.21E-122	1.13E-117	--	PREDICTED: HMG box-containing protein 4 isoform X2 [Habropoda laboriosa]	-	-	-	-	-	-	-
PH1	ncbi_113827590	tric-1B.1	1.428454861	0.642875111	1.151845046	5.90E-121	1.58E-116	tric-1B.1	PREDICTED: trimeric intracellular cation channel type B-like [Hyalella azteca]	-	-	-	-	-	-	-
PH1	ncbi_113812898	U2af38	1.473130413	0.745944549	0.98174486	2.99E-120	8.00E-116	U2af38	PREDICTED: splicing factor U2af 38 kDa subunit [Anoplophora glabripennis]	Genetic Information Processing;Human Diseases	Transcription;Infectious diseases	ko03040//Spliceosome;ko05131//Shigellosis	K12836;K12836	GO:0043231//intracellular membrane-bounded organelle	GO:0003676//nucleic acid binding;GO:0043169//cation binding	-
PH1	ncbi_113822456	ncbi_113822456	2.453196084	1.417992587	0.790812563	8.16E-120	2.19E-115	--	-	-	-	-	-	-	-	-
PH1	ncbi_113822730	CG10417	1.999849923	1.069543965	0.902895951	3.81E-119	1.02E-114	CG10417	PREDICTED: probable protein phosphatase 2C 21 [Anoplophora glabripennis]	-	-	-	-	-	GO:0004721//phosphoprotein phosphatase activity;GO:0043169//cation binding	GO:0006464//cellular protein modification process
PH1	ncbi_113818471	Adarb1	23.4381499	17.36326011	0.432820843	4.14E-117	1.11E-112	Adarb1	PREDICTED: double-stranded RNA-specific editase 1-like [Hyalella azteca]	-	-	-	-	-	-	-
PH1	ncbi_113806502	larp7	0.675714224	0.263618298	1.357962713	4.77E-117	1.28E-112	larp7	La-related protein 7 [Dufourea novaeangliae]	-	-	-	-	-	-	-
PH1	ncbi_113802226	Hspbp1	1.125821602	0.420193658	1.421851943	2.93E-116	7.84E-112	Hspbp1	PREDICTED: hsp70-binding protein 1-like isoform X2 [Limulus polyphemus]	Genetic Information Processing	Folding, sorting and degradation	ko04141//Protein processing in endoplasmic reticulum	K09562	-	-	-
PH1	ncbi_113817572	DHRS11	1.103866648	0.549327737	1.006826853	3.69E-116	9.88E-112	DHRS11	PREDICTED: dehydrogenase/reductase SDR family member 11-like isoform X2 [Lingula anatina]	-	-	-	-	-	-	-
PH1	ncbi_113806503	Pex3	1.654964035	0.879248401	0.912457154	5.82E-116	1.56E-111	Pex3	Peroxisomal biogenesis factor 3 [Zootermopsis nevadensis]	Cellular Processes	Transport and catabolism	ko04146//Peroxisome	K13336	GO:0043231//intracellular membrane-bounded organelle	-	-
PH1	ncbi_113806060	ntf2	1.708381802	0.879254653	0.958277466	2.12E-114	5.68E-110	ntf2	PREDICTED: probable nuclear transport factor 2 [Hyalella azteca]	-	-	-	-	-	-	-
PH1	ncbi_113807414	ncbi_113807414	0.525748549	0.208748147	1.332609573	3.12E-114	8.36E-110	--	PREDICTED: uncharacterized protein LOC108683041 [Hyalella azteca]	-	-	-	-	-	-	-
PH1	ncbi_113804952	Usp2	0.426494043	0.148788267	1.519264826	8.38E-114	2.24E-109	Usp2	PREDICTED: ubiquitin carboxyl-terminal hydrolase 4-like isoform X3 [Hyalella azteca]	-	-	-	-	-	GO:0070011//peptidase activity, acting on L-amino acid peptides	GO:0019941//modification-dependent protein catabolic process
PH1	ncbi_113805586	ncbi_113805586	1.704773068	0.901383807	0.919366269	6.02E-113	1.61E-108	--	PREDICTED: probable palmitoyltransferase ZDHHC24 [Limulus polyphemus]	-	-	-	-	-	-	-
PH1	ncbi_113812569	DDX39B	1.444725053	0.735531846	0.973935248	1.34E-110	3.58E-106	DDX39B	PREDICTED: spliceosome RNA helicase DDX39B-like [Hyalella azteca]	Genetic Information Processing;Human Diseases;Genetic Information Processing;Genetic Information Processing	Translation;Infectious diseases;Transcription;Translation	ko03013//RNA transport;ko05164//Influenza A;ko03040//Spliceosome;ko03015//mRNA surveillance pathway	K12812;K12812;K12812;K12812	GO:0016604//nuclear body;GO:0043234//protein complex;GO:0097525//spliceosomal snRNP complex	GO:0003724//RNA helicase activity;GO:0005515//protein binding;GO:0017069//snRNA binding;GO:0032550//purine ribonucleoside binding;GO:0042623//ATPase activity, coupled	GO:0000077//DNA damage checkpoint;GO:0000377//RNA splicing, via transesterification reactions with bulged adenosine as nucleophile;GO:0006406//mRNA export from nucleus;GO:0022618//ribonucleoprotein complex assembly;GO:0032784//regulation of DNA-templated transcription, elongation
PH1	ncbi_113818823	TAF15	2.984507841	1.817008868	0.715927583	3.40E-110	9.11E-106	TAF15	PREDICTED: RNA-binding protein cabeza-like isoform X3 [Hyalella azteca]	Human Diseases	Cancers	ko05202//Transcriptional misregulation in cancers	K13098	-	-	-
PH1	ncbi_113819549	boca	2.179549185	1.228762729	0.826823399	1.36E-109	3.65E-105	boca	LDLR chaperone boca [Daphnia magna]	-	-	-	-	-	-	-
PH1	ncbi_113821676	smndc1	1.456881231	0.768656373	0.922472578	2.72E-109	7.29E-105	smndc1	PREDICTED: survival of motor neuron-related-splicing factor 30 [Crassostrea gigas]	Genetic Information Processing	Transcription	ko03040//Spliceosome	K12839	-	-	-
PH1	ncbi_113808091	O-fut1	1.443919625	0.73923815	0.96587932	3.21E-109	8.59E-105	O-fut1	GDP-fucose protein O-fucosyltransferase 1 [Zootermopsis nevadensis]	Metabolism	Glycan biosynthesis and metabolism	ko00514//Other types of O-glycan biosynthesis	K03691	-	GO:0008417//fucosyltransferase activity	GO:0006493//protein O-linked glycosylation
PH1	ncbi_113829158	Rpb11	1.44966428	0.751719537	0.947452428	6.35E-109	1.70E-104	Rpb11	PREDICTED: DNA-directed RNA polymerase II subunit RPB11-like [Hyalella azteca]	Metabolism;Human Diseases;Metabolism;Human Diseases;Metabolism;Genetic Information Processing	Global and overview maps;Neurodegenerative diseases;Nucleotide metabolism;Infectious diseases;Nucleotide metabolism;Transcription	ko01100//Metabolic pathways;ko05016//Huntington disease;ko00230//Purine metabolism;ko05169//Epstein-Barr virus infection;ko00240//Pyrimidine metabolism;ko03020//RNA polymerase	K03008;K03008;K03008;K03008;K03008;K03008	-	GO:0005515//protein binding;GO:0034062//RNA polymerase activity	GO:0034645//cellular macromolecule biosynthetic process
PH1	ncbi_113811391	HAT1	1.312207525	0.407552149	1.686939321	9.44E-108	2.53E-103	HAT1	Histone acetyltransferase type B catalytic subunit [Zootermopsis nevadensis]	Human Diseases	Substance dependence	ko05034//Alcoholism	K11303	-	-	GO:0009987//cellular process
PH1	ncbi_113816890	TMED6	1.456048735	0.752638519	0.952029613	1.45E-107	3.89E-103	TMED6	PREDICTED: transmembrane emp24 domain-containing protein 1-like [Hyalella azteca]	-	-	-	-	-	-	-
PH1	ncbi_113817372	hsc71	2.116882053	1.224887415	0.789291738	3.75E-107	1.00E-102	hsc71	heat shock protein 70 [Litopenaeus vannamei]	Genetic Information Processing;Cellular Processes;Human Diseases;Genetic Information Processing;Environmental Information Processing;Organismal Systems;Human Diseases;Human Diseases;Organismal Systems;Human Diseases;Human Diseases;Human Diseases;Organismal Systems	Folding, sorting and degradation;Transport and catabolism;Infectious diseases;Transcription;Signal transduction;Aging;Infectious diseases;Infectious diseases;Endocrine system;Infectious diseases;Infectious diseases;Neurodegenerative diseases;Immune system	ko04141//Protein processing in endoplasmic reticulum;ko04144//Endocytosis;ko05164//Influenza A;ko03040//Spliceosome;ko04010//MAPK signaling pathway;ko04213//Longevity regulating pathway - multiple species;ko05169//Epstein-Barr virus infection;ko05145//Toxoplasmosis;ko04915//Estrogen signaling pathway;ko05162//Measles;ko05134//Legionellosis;ko05020//Prion diseases;ko04612//Antigen processing and p…	K03283;K03283;K03283;K03283;K03283;K03283;K03283;K03283;K03283;K03283;K03283;K03283;K03283	-	-	-
PH1	ncbi_113826234	Ostc	7.942178781	5.557238784	0.515166605	1.37E-106	3.68E-102	Ostc	PREDICTED: oligosaccharyltransferase complex subunit OSTC-like [Hyalella azteca]	-	-	-	-	-	-	-
PH1	ncbi_113818962	SUPT4H1	1.117740947	0.559412055	0.998602612	2.39E-105	6.39E-101	SUPT4H1	PREDICTED: transcription elongation factor SPT4-like [Hyalella azteca]	-	-	-	-	-	GO:0046914//transition metal ion binding	GO:0032784//regulation of DNA-templated transcription, elongation
PH1	ncbi_113805527	lrrfip2	3.557421626	2.180850991	0.705940773	3.84E-105	1.03E-100	lrrfip2	leucine-rich repeat flightless-I-interacting protein 2D [Litopenaeus vannamei]	-	-	-	-	-	-	-
PH1	ncbi_113825948	ncbi_113825948	30.57105101	23.23076799	0.396129303	4.76E-105	1.27E-100	--	-	-	-	-	-	-	-	-
PH1	ncbi_113821183	POLD3	0.945919395	0.443005622	1.094392244	1.15E-104	3.07E-100	POLD3	PREDICTED: DNA polymerase delta subunit 3-like isoform X1 [Hyalella azteca]	Metabolism;Metabolism;Human Diseases;Metabolism;Genetic Information Processing;Genetic Information Processing;Genetic Information Processing;Genetic Information Processing;Genetic Information Processing	Global and overview maps;Nucleotide metabolism;Infectious diseases;Nucleotide metabolism;Replication and repair;Replication and repair;Replication and repair;Replication and repair;Replication and repair	ko01100//Metabolic pathways;ko00230//Purine metabolism;ko05166//HTLV-I infection;ko00240//Pyrimidine metabolism;ko03420//Nucleotide excision repair;ko03410//Base excision repair;ko03440//Homologous recombination;ko03030//DNA replication;ko03430//Mismatch repair	K03504;K03504;K03504;K03504;K03504;K03504;K03504;K03504;K03504	-	-	-
PH1	ncbi_113816012	TOP1	2.773167723	1.627891411	0.768530406	2.41E-103	6.47E-99	TOP1	PREDICTED: DNA topoisomerase I, mitochondrial-like isoform X3 [Hyalella azteca]	-	-	-	-	-	-	-
PH1	ncbi_113815625	tsu	2.93398647	1.829494896	0.681416827	3.60E-103	9.63E-99	tsu	tsunagi/Y14 [Macrobrachium nipponense]	Genetic Information Processing;Genetic Information Processing;Genetic Information Processing	Translation;Transcription;Translation	ko03013//RNA transport;ko03040//Spliceosome;ko03015//mRNA surveillance pathway	K12876;K12876;K12876	GO:0005634//nucleus	GO:0003676//nucleic acid binding	GO:0006396//RNA processing;GO:0006810//transport
PH1	ncbi_113809334	ncbi_113809334	0.814307877	0.382800033	1.088983406	1.01E-102	2.70E-98	--	PREDICTED: nucleoprotein TPR-like isoform X2 [Hyalella azteca]	Human Diseases;Genetic Information Processing;Human Diseases	Cancers;Translation;Cancers	ko05200//Pathways in cancer;ko03013//RNA transport;ko05216//Thyroid cancer	K09291;K09291;K09291	-	-	-
PH1	ncbi_113802431	ncbi_113802431	2.072369894	1.143783025	0.857468131	1.05E-102	2.80E-98	--	PREDICTED: LIM domain and actin-binding protein 1 isoform X15 [Cimex lectularius]	-	-	-	-	-	-	-
PH1	ncbi_113801198	mapk1	2.596319625	1.422307019	0.868235081	2.17E-102	5.80E-98	mapk1	mitogen-activated protein kinase [Marsupenaeus japonicus]	Human Diseases;Human Diseases;Cellular Processes;Human Diseases;Environmental Information Processing;Human Diseases;Cellular Processes;Organismal Systems;Cellular Processes;Environmental Information Processing;Organismal Systems;Human Diseases;Environmental Information Processing;Human Diseases;Cellular Processes;Organismal Systems;Environmental Information Processing;Human Diseases;Human Disease…	Cancers;Infectious diseases;Cellular community - eukaryotes;Cancers;Signal transduction;Cancers;Cell motility;Endocrine system;Cell growth and death;Signal transduction;Immune system;Cancers;Signal transduction;Infectious diseases;Cellular community - eukaryotes;Endocrine system;Signal transduction;Infectious diseases;Cancers;Infectious diseases;Signal transduction;Neurodegenerative diseases;Subs…	ko05200//Pathways in cancer;ko05165//Human papillomavirus infection;ko04510//Focal adhesion;ko05205//Proteoglycans in cancer;ko04151//PI3K-Akt signaling pathway;ko05225//Hepatocellular carcinoma;ko04810//Regulation of actin cytoskeleton;ko04919//Thyroid hormone signaling pathway;ko04210//Apoptosis;ko04015//Rap1 signaling pathway;ko04611//Platelet activation;ko05231//Choline metabolism in cancer;k…	K04371;K04371;K04371;K04371;K04371;K04371;K04371;K04371;K04371;K04371;K04371;K04371;K04371;K04371;K04371;K04371;K04371;K04371;K04371;K04371;K04371;K04371;K04371;K04371;K04371;K04371;K04371;K04371;K04371;K04371;K04371;K04371;K04371;K04371;K04371;K04371;K04371;K04371;K04371;K04371;K04371;K04371;K04371;K04371;K04371;K04371;K04371;K04371;K04371;K04371;K04371;K04371;K04371;K04371;K04371;K04371;K04371;…	-	-	-
PH1	ncbi_113807959	SSR2	10.8632893	7.621225493	0.511366096	3.28E-102	8.78E-98	SSR2	PREDICTED: translocon-associated protein subunit beta-like [Hyalella azteca]	Genetic Information Processing	Folding, sorting and degradation	ko04141//Protein processing in endoplasmic reticulum	K13250	-	-	-
PH1	ncbi_113805923	SRRM1	2.933022921	1.80489878	0.700470413	7.06E-102	1.89E-97	SRRM1	PREDICTED: serine/arginine repetitive matrix protein 1 isoform X2 [Halyomorpha halys]	Genetic Information Processing;Genetic Information Processing	Translation;Translation	ko03013//RNA transport;ko03015//mRNA surveillance pathway	K13171;K13171	-	-	-
PH1	ncbi_113815758	Tomm22	1.68422442	0.937858813	0.844641731	9.11E-100	2.44E-95	Tomm22	PREDICTED: mitochondrial import receptor subunit TOM22 homolog isoform X2 [Hyalella azteca]	-	-	-	-	-	-	-
PH1	ncbi_113809721	ncbi_113809721	2.428454846	1.383745034	0.811460522	9.43E-99	2.53E-94	--	PREDICTED: dolichol-phosphate mannosyltransferase subunit 3-like [Hyalella azteca]	Metabolism;Metabolism	Global and overview maps;Glycan biosynthesis and metabolism	ko01100//Metabolic pathways;ko00510//N-Glycan biosynthesis	K09659;K09659	-	-	-
PH1	ncbi_113807004	Snrpd2	1.427809667	0.775285066	0.881004895	2.18E-98	5.85E-94	Snrpd2	PREDICTED: probable small nuclear ribonucleoprotein Sm D2 [Hyalella azteca]	Genetic Information Processing	Transcription	ko03040//Spliceosome	K11096	GO:0030529//intracellular ribonucleoprotein complex	-	-
PH1	ncbi_113819953	Bap60	0.771758191	0.362451525	1.090360829	3.17E-98	8.50E-94	Bap60	Bap60 [Marsupenaeus japonicus]	Organismal Systems;Human Diseases	Environmental adaptation;Cancers	ko04714//Thermogenesis;ko05225//Hepatocellular carcinoma	K11650;K11650	-	-	-
PH1	ncbi_113803588	Ddx46	1.164469023	0.599771102	0.957188344	7.09E-98	1.90E-93	Ddx46	PREDICTED: probable ATP-dependent RNA helicase DDX46 isoform X3 [Hyalella azteca]	Genetic Information Processing	Transcription	ko03040//Spliceosome	K12811	-	GO:0017111//nucleoside-triphosphatase activity;GO:0032550//purine ribonucleoside binding	-
PH1	ncbi_113811207	HRP65	0.949201288	0.461274242	1.041089323	2.15E-97	5.76E-93	HRP65	PREDICTED: protein no-on-transient A-like [Hyalella azteca]	-	-	-	-	-	-	-
PH1	ncbi_113823527	crt	13.81757573	10.04846378	0.459529562	3.24E-97	8.68E-93	crt	calreticulin [Litopenaeus vannamei]	Genetic Information Processing;Cellular Processes;Human Diseases;Human Diseases;Human Diseases;Organismal Systems	Folding, sorting and degradation;Transport and catabolism;Infectious diseases;Infectious diseases;Infectious diseases;Immune system	ko04141//Protein processing in endoplasmic reticulum;ko04145//Phagosome;ko05166//HTLV-I infection;ko05163//Human cytomegalovirus infection;ko05142//Chagas disease (American trypanosomiasis);ko04612//Antigen processing and presentation	K08057;K08057;K08057;K08057;K08057;K08057	GO:0043231//intracellular membrane-bounded organelle	GO:0001071//nucleic acid binding transcription factor activity;GO:0003677//DNA binding;GO:0005515//protein binding	GO:0010468//regulation of gene expression;GO:0044267//cellular protein metabolic process
PH1	ncbi_113809927	PPM1B	3.147482002	2.069067437	0.605217461	1.45E-96	3.87E-92	PPM1B	protein phosphatase 1B [Marsupenaeus japonicus]	Environmental Information Processing;Environmental Information Processing	Signal transduction;Signal transduction	ko04013//MAPK signaling pathway - fly;ko04010//MAPK signaling pathway	K04461;K04461	-	-	-
PH1	ncbi_113803034	ncbi_113803034	8.065173075	5.897575941	0.451583403	4.19E-96	1.12E-91	--	-	-	-	-	-	-	-	-
PH1	ncbi_113820513	ncbi_113820513	0.90238499	0.452456315	0.995964566	1.27E-95	3.39E-91	--	-	-	-	-	-	-	-	-
PH1	ncbi_113803626	MEAF6	0.871809286	0.432887958	1.0100189	2.87E-95	7.68E-91	MEAF6	PREDICTED: chromatin modification-related protein MEAF6-like [Limulus polyphemus]	-	-	-	-	-	-	-
PH1	ncbi_113809069	ncbi_113809069	1.557543377	0.855768573	0.863979739	4.04E-95	1.08E-90	--	AGAP012926-PA-like protein [Anopheles sinensis]	-	-	-	-	-	-	-
PH1	ncbi_113823326	PHF10	0.582608535	0.267595109	1.122475087	6.08E-95	1.63E-90	PHF10	PREDICTED: platelet binding protein GspB-like [Hyalella azteca]	-	-	-	-	-	-	-
PH1	ncbi_113805572	Wdr83os	3.478156131	2.30747911	0.592005108	8.69E-95	2.33E-90	Wdr83os	PREDICTED: protein Asterix [Copidosoma floridanum]	-	-	-	-	-	-	-
PH1	ncbi_113827782	GATAD2B	0.88066897	0.422091115	1.061045375	1.44E-94	3.85E-90	GATAD2B	PREDICTED: transcriptional repressor p66-beta [Aethina tumida]	-	-	-	-	-	-	-
PH1	ncbi_113810208	HINT2	3.213335286	2.007671061	0.678548607	2.76E-94	7.39E-90	HINT2	PREDICTED: uncharacterized HIT-like protein Synpcc7942_1390 [Octopus bimaculoides]	-	-	-	-	-	-	-
PH1	ncbi_113819413	IscW_ISCW010050	5.109579052	3.642930318	0.488105041	1.44E-93	3.87E-89	IscW_ISCW010050	PREDICTED: transcription initiation factor IIA subunit 2 [Papilio polytes]	Human Diseases;Genetic Information Processing	Cancers;Transcription	ko05203//Viral carcinogenesis;ko03022//Basal transcription factors	K03123;K03123	GO:0016591//DNA-directed RNA polymerase II, holoenzyme	-	GO:0006352//DNA-templated transcription, initiation;GO:0010468//regulation of gene expression
PH1	ncbi_113817751	Uchl5	2.934944022	1.877993267	0.644141097	7.03E-93	1.88E-88	Uchl5	ubiquitin carboxyl-terminal hydrolase isozyme L5 [Scylla paramamosain]	-	-	-	-	GO:0044464//cell part	GO:0008238//exopeptidase activity	GO:0019941//modification-dependent protein catabolic process
PH1	ncbi_113827204	Rfc1	1.089530894	0.517217466	1.074864207	3.24E-92	8.67E-88	Rfc1	PREDICTED: replication factor C subunit 1-like [Hyalella azteca]	Genetic Information Processing;Genetic Information Processing;Genetic Information Processing	Replication and repair;Replication and repair;Replication and repair	ko03420//Nucleotide excision repair;ko03030//DNA replication;ko03430//Mismatch repair	K10754;K10754;K10754	-	-	-
PH1	ncbi_113809766	med6	0.573108369	0.25451095	1.171080234	1.65E-91	4.43E-87	med6	PREDICTED: mediator of RNA polymerase II transcription subunit 6 [Trichogramma pretiosum]	-	-	-	-	-	-	-
PH1	ncbi_113814613	tws	1.209817323	0.661533239	0.870903671	2.53E-91	6.79E-87	tws	serine/threonine-protein phosphatase PP2A regulatory subunit B isoform [Penaeus monodon]	Human Diseases;Environmental Information Processing;Cellular Processes;Environmental Information Processing;Environmental Information Processing;Organismal Systems;Environmental Information Processing;Environmental Information Processing;Genetic Information Processing;Organismal Systems;Human Diseases;Human Diseases	Infectious diseases;Signal transduction;Cellular community - eukaryotes;Signal transduction;Signal transduction;Circulatory system;Signal transduction;Signal transduction;Translation;Nervous system;Infectious diseases;Infectious diseases	ko05165//Human papillomavirus infection;ko04151//PI3K-Akt signaling pathway;ko04530//Tight junction;ko04390//Hippo signaling pathway;ko04391//Hippo signaling pathway -fly;ko04261//Adrenergic signaling in cardiomyocytes;ko04071//Sphingolipid signaling pathway;ko04152//AMPK signaling pathway;ko03015//mRNA surveillance pathway;ko04728//Dopaminergic synapse;ko05160//Hepatitis C;ko05142//Chagas diseas…	K04354;K04354;K04354;K04354;K04354;K04354;K04354;K04354;K04354;K04354;K04354;K04354	-	GO:0019888//protein phosphatase regulator activity	GO:0019222//regulation of metabolic process;GO:0050794//regulation of cellular process
PH1	ncbi_113806284	Dyrk2	0.527722328	0.230755947	1.193411197	7.87E-91	2.11E-86	Dyrk2	PREDICTED: dual specificity tyrosine-phosphorylation-regulated kinase 1A-like isoform X3 [Branchiostoma belcheri]	-	-	-	-	-	-	-
PH1	ncbi_113806999	RAP2C	3.213739524	1.965331628	0.70948023	2.06E-90	5.51E-86	RAP2C	PREDICTED: ras-related protein Rap-2c-like [Hyalella azteca]	Cellular Processes	Cellular community - eukaryotes	ko04530//Tight junction	K07839	-	-	-
PH1	ncbi_113828857	PPIH	0.905542796	0.461241275	0.973261203	2.87E-90	7.70E-86	PPIH	PREDICTED: peptidyl-prolyl cis-trans isomerase H-like isoform X2 [Hyalella azteca]	Genetic Information Processing	Transcription	ko03040//Spliceosome	K09567	-	GO:0016859//cis-trans isomerase activity	GO:0044267//cellular protein metabolic process
PH1	ncbi_113806066	nudt21	0.997519049	0.521195921	0.936518598	4.52E-90	1.21E-85	nudt21	PREDICTED: cleavage and polyadenylation specificity factor subunit 5 [Stomoxys calcitrans]	Genetic Information Processing	Translation	ko03015//mRNA surveillance pathway	K14397	GO:0043234//protein complex	GO:0003824//catalytic activity	GO:0031124//mRNA 3'-end processing
PH1	ncbi_113827272	isoc2	1.547916661	0.899992451	0.782342995	1.29E-89	3.45E-85	isoc2	PREDICTED: isochorismatase domain-containing protein 2, mitochondrial-like [Limulus polyphemus]	-	-	-	-	-	GO:0016787//hydrolase activity	-
PH1	ncbi_113814757	Ddx17	1.527807423	0.890279881	0.779131846	3.43E-89	9.20E-85	Ddx17	DEAD-box RNA helicase variant 1 [Litopenaeus vannamei]	Human Diseases;Human Diseases;Genetic Information Processing	Cancers;Cancers;Transcription	ko05205//Proteoglycans in cancer;ko05202//Transcriptional misregulation in cancers;ko03040//Spliceosome	K12823;K12823;K12823	-	GO:0017111//nucleoside-triphosphatase activity;GO:0032550//purine ribonucleoside binding	-
PH1	ncbi_113827326	ncbi_113827326	0.808607663	0.402053859	1.008051099	7.70E-89	2.06E-84	--	-	-	-	-	-	-	-	-
PH1	ncbi_113811594	HGV2	1.905721513	0.909093512	1.067836704	2.88E-88	7.72E-84	HGV2	nuclear autoantigenic sperm protein [Litopenaeus vannamei]	-	-	-	-	-	-	-
PH1	ncbi_113812554	ncbi_113812554	1.560644056	0.876908335	0.831643584	4.14E-88	1.11E-83	--	PREDICTED: synaptotagmin-7-like [Limulus polyphemus]	-	-	-	-	-	-	-
PH1	ncbi_113800275	pabpn1	1.183154319	0.638468766	0.889950308	4.70E-88	1.26E-83	pabpn1	PREDICTED: polyadenylate-binding protein 2 isoform X1 [Anoplophora glabripennis]	Human Diseases;Genetic Information Processing	Infectious diseases;Translation	ko05164//Influenza A;ko03015//mRNA surveillance pathway	K14396;K14396	-	GO:0097159//organic cyclic compound binding	-
PH1	ncbi_113800712	TfIIS	0.659557217	0.302577686	1.124192223	5.34E-88	1.43E-83	TfIIS	PREDICTED: transcription elongation factor S-II-like [Hyalella azteca]	-	-	-	-	-	-	GO:0006355//regulation of transcription, DNA-templated
PH1	ncbi_113821415	Rbm17	0.833784109	0.444220354	0.908398377	3.34E-87	8.94E-83	Rbm17	PREDICTED: splicing factor 45 [Papilio xuthus]	Genetic Information Processing	Transcription	ko03040//Spliceosome	K12840	-	-	-
PH1	ncbi_113806987	MED22	1.20328836	0.661523726	0.863117611	4.97E-87	1.33E-82	MED22	PREDICTED: mediator of RNA polymerase II transcription subunit 22-like [Hyalella azteca]	-	-	-	-	GO:0043234//protein complex	-	GO:0006355//regulation of transcription, DNA-templated
PH1	ncbi_113805842	Cdc42	4.223059147	2.908740397	0.537893911	7.93E-86	2.12E-81	Cdc42	cell division control protein 42 [Marsupenaeus japonicus]	Human Diseases;Human Diseases;Cellular Processes;Human Diseases;Cellular Processes;Cellular Processes;Cellular Processes;Environmental Information Processing;Cellular Processes;Human Diseases;Human Diseases;Human Diseases;Human Diseases;Environmental Information Processing;Human Diseases;Environmental Information Processing;Human Diseases;Organismal Systems;Organismal Systems;Organismal Systems;O…	Cancers;Infectious diseases;Cellular community - eukaryotes;Cancers;Cell motility;Cellular community - eukaryotes;Transport and catabolism;Signal transduction;Cellular community - eukaryotes;Infectious diseases;Infectious diseases;Infectious diseases;Infectious diseases;Signal transduction;Cancers;Signal transduction;Endocrine and metabolic diseases;Immune system;Immune system;Development;Immune …	ko05200//Pathways in cancer;ko05165//Human papillomavirus infection;ko04510//Focal adhesion;ko05205//Proteoglycans in cancer;ko04810//Regulation of actin cytoskeleton;ko04530//Tight junction;ko04144//Endocytosis;ko04015//Rap1 signaling pathway;ko04520//Adherens junction;ko05130//Pathogenic Escherichia coli infection;ko05131//Shigellosis;ko05132//Salmonella infection;ko05100//Bacterial invasion of…	K04393;K04393;K04393;K04393;K04393;K04393;K04393;K04393;K04393;K04393;K04393;K04393;K04393;K04393;K04393;K04393;K04393;K04393;K04393;K04393;K04393;K04393;K04393;K04393;K04393;K04393;K04393;K04393;K04393	-	-	-
PH1	ncbi_113820746	ncbi_113820746	1.283066775	0.725251034	0.823043902	1.28E-85	3.43E-81	--	PREDICTED: U4/U6.U5 small nuclear ribonucleoprotein 27 kDa protein-like isoform X1 [Hyalella azteca]	-	-	-	-	-	-	-
PH1	ncbi_113818583	LRRC59	3.855478579	2.469581771	0.642643214	5.79E-85	1.55E-80	LRRC59	PREDICTED: leucine-rich repeat-containing protein 59-like [Hyalella azteca]	-	-	-	-	-	-	-
PH1	ncbi_113828234	ncbi_113828234	1.577614304	0.913665349	0.788006791	1.34E-84	3.58E-80	--	PREDICTED: carbohydrate sulfotransferase 1-like [Hyalella azteca]	-	-	-	-	-	-	-
PH1	ncbi_113815850	PHF5A	1.481138881	0.880062502	0.75102903	3.68E-84	9.84E-80	PHF5A	PREDICTED: PHD finger-like domain-containing protein 5A [Hyalella azteca]	Genetic Information Processing	Transcription	ko03040//Spliceosome	K12834	-	GO:0016741//transferase activity, transferring one-carbon groups	GO:0008152//metabolic process
PH1	ncbi_113811198	Adar	1.16966798	0.617349874	0.921938814	6.46E-84	1.73E-79	Adar	double-stranded RNA-specific adenosine deaminase [Marsupenaeus japonicus]	-	-	-	-	-	-	-
PH1	ncbi_113822061	lolal	0.499917644	0.200096903	1.320991604	6.98E-84	1.87E-79	lolal	PREDICTED: longitudinals lacking protein, isoforms H/M/V-like isoform X7 [Hyalella azteca]	Environmental Information Processing	Signal transduction	ko04013//MAPK signaling pathway - fly	K09237	-	-	-
PH1	ncbi_113803440	GILT1	7.341985445	5.397981609	0.443750193	1.27E-83	3.40E-79	GILT1	gamma-interferon induced thiol reductase GILT2 [Scylla paramamosain]	-	-	-	-	-	-	-
PH1	ncbi_113830028	ncbi_113830028	0.859452482	0.477803313	0.847001019	2.05E-83	5.48E-79	--	PREDICTED: calphotin-like isoform X6 [Lates calcarifer]	-	-	-	-	-	-	-
PH1	ncbi_113804525	smc3	2.639931336	1.531026988	0.786000692	2.05E-83	5.49E-79	smc3	PREDICTED: structural maintenance of chromosomes protein 3-like isoform X1 [Hyalella azteca]	Cellular Processes;Cellular Processes	Cell growth and death;Cell growth and death	ko04110//Cell cycle;ko04114//Oocyte meiosis	K06669;K06669	-	-	-
PH1	ncbi_113802110	RPN1	3.554387637	2.392901742	0.570839871	2.17E-83	5.82E-79	RPN1	ribophorin I [Penaeus monodon]	Metabolism;Genetic Information Processing;Metabolism	Global and overview maps;Folding, sorting and degradation;Glycan biosynthesis and metabolism	ko01100//Metabolic pathways;ko04141//Protein processing in endoplasmic reticulum;ko00510//N-Glycan biosynthesis	K12666;K12666;K12666	-	-	-
PH1	ncbi_113826869	ANXA11	0.581184022	0.279440643	1.056453175	2.60E-83	6.97E-79	ANXA11	PREDICTED: annexin A7-like [Hyalella azteca]	-	-	-	-	-	-	-
PH1	ncbi_113814918	GCR1	2.783984387	1.826015329	0.608452244	3.16E-83	8.47E-79	GCR1	serotonin receptor [Metapenaeus ensis]	-	-	-	-	-	GO:0004871//signal transducer activity	GO:0009987//cellular process
PH1	ncbi_113800167	PIN1	3.357647494	2.306500237	0.541745335	1.76E-82	4.71E-78	PIN1	Peptidyl-prolyl cis-trans isomerase NIMA-interacting [Daphnia magna]	Organismal Systems	Immune system	ko04622//RIG-I-like receptor signaling pathway	K09578	-	GO:0016859//cis-trans isomerase activity	-
PH1	ncbi_113829206	ncbi_113829206	1.422407647	0.814836389	0.803752671	2.11E-81	5.65E-77	--	PREDICTED: ribonuclease H2 subunit C-like [Hyalella azteca]	Genetic Information Processing	Replication and repair	ko03030//DNA replication	K10745	-	-	-
PH1	ncbi_113828640	CalpB	0.656020187	0.296890358	1.14380997	3.51E-81	9.40E-77	CalpB	calpain B [Gecarcinus lateralis]	-	-	-	-	-	-	-
PH1	ncbi_113819739	CCT4	3.247436566	2.177816983	0.576418626	4.15E-81	1.11E-76	CCT4	PREDICTED: T-complex protein 1 subunit delta-like [Hyalella azteca]	-	-	-	-	-	-	-
PH1	ncbi_113823451	Bet1	1.322809423	0.680659934	0.958599132	4.43E-81	1.19E-76	Bet1	PREDICTED: BET1 homolog [Dufourea novaeangliae]	Genetic Information Processing	Folding, sorting and degradation	ko04130//SNARE interactions in vesicular transport	K08504	-	-	-
PH1	ncbi_113818133	lola	1.87178192	1.216543461	0.621624495	2.04E-80	5.47E-76	lola	PREDICTED: longitudinals lacking protein, isoforms H/M/V-like isoform X3 [Hyalella azteca]	-	-	-	-	-	-	-
PH1	ncbi_113801300	U2af50	1.781110224	1.106104303	0.687289366	3.24E-80	8.69E-76	U2af50	PREDICTED: splicing factor U2AF 50 kDa subunit-like isoform X2 [Hyalella azteca]	Genetic Information Processing	Transcription	ko03040//Spliceosome	K12837	-	-	-
PH1	ncbi_113823354	CG9849	0.58157017	0.262027128	1.150237086	8.31E-80	2.23E-75	CG9849	PREDICTED: PRADC1-like protein [Hyalella azteca]	-	-	-	-	-	-	-
PH1	ncbi_113803087	Txn2	1.62801544	0.972814512	0.742877726	2.24E-79	5.99E-75	Txn2	thioredoxin [Scylla paramamosain]	Human Diseases;Organismal Systems	Cardiovascular diseases;Immune system	ko05418//Fluid shear stress and atherosclerosis;ko04621//NOD-like receptor signaling pathway	K03671;K03671	-	GO:0015036//disulfide oxidoreductase activity	GO:0019725//cellular homeostasis;GO:0044710//single-organism metabolic process
PH1	ncbi_113818123	DOLPP1	1.153339731	0.655367904	0.815440614	2.71E-79	7.25E-75	DOLPP1	Dolichyldiphosphatase 1 [Melipona quadrifasciata]	Metabolism	Glycan biosynthesis and metabolism	ko00510//N-Glycan biosynthesis	K07252	-	-	-
PH1	ncbi_113822961	ncbi_113822961	0.502086726	0.219287799	1.195111036	4.53E-79	1.21E-74	--	PREDICTED: neurofilament heavy polypeptide-like [Fopius arisanus]	-	-	-	-	-	-	-
PH1	ncbi_113803517	daf-41	0.925218333	0.511668233	0.854585187	1.45E-78	3.88E-74	daf-41	P23 [Litopenaeus vannamei]	Metabolism;Metabolism	Global and overview maps;Lipid metabolism	ko01100//Metabolic pathways;ko00590//Arachidonic acid metabolism	K15730;K15730	-	-	-
PH1	ncbi_113816328	baz1b	0.788701747	0.349320686	1.174927761	1.63E-77	4.36E-73	baz1b	PREDICTED: tyrosine-protein kinase BAZ1B-like isoform X2 [Priapulus caudatus]	-	-	-	-	-	GO:0005488//binding	GO:0044238//primary metabolic process;GO:0044260//cellular macromolecule metabolic process
PH1	ncbi_113810269	THOC3	0.926358347	0.481535649	0.943927778	5.74E-77	1.54E-72	THOC3	PREDICTED: THO complex subunit 3-like [Hyalella azteca]	Genetic Information Processing;Genetic Information Processing	Translation;Transcription	ko03013//RNA transport;ko03040//Spliceosome	K12880;K12880	-	-	-
PH1	ncbi_113828837	Tbca	1.283454542	0.742086301	0.790373319	9.67E-77	2.59E-72	Tbca	PREDICTED: tubulin-specific chaperone A-like [Hyalella azteca]	-	-	-	-	GO:0015630//microtubule cytoskeleton;GO:0031988//membrane-bounded vesicle	GO:0003723//RNA binding;GO:0005515//protein binding	GO:0043623//cellular protein complex assembly
PH1	ncbi_113819217	NUDT9	0.81319738	0.407218819	0.997801331	1.23E-76	3.29E-72	NUDT9	PREDICTED: ADP-ribose pyrophosphatase, mitochondrial-like [Lingula anatina]	Metabolism	Nucleotide metabolism	ko00230//Purine metabolism	K13988	-	-	-
PH1	ncbi_113830314	gkap1-a	2.230200532	1.396033786	0.675839582	1.37E-76	3.67E-72	gkap1-a	PREDICTED: G kinase-anchoring protein 1-like [Hyalella azteca]	-	-	-	-	-	-	-
PH1	ncbi_113804953	MED30	1.249790043	0.725126524	0.785381101	1.95E-76	5.22E-72	MED30	PREDICTED: mediator of RNA polymerase II transcription subunit 30-like [Hyalella azteca]	Organismal Systems	Endocrine system	ko04919//Thyroid hormone signaling pathway	K15143	-	-	-
PH1	ncbi_113809669	Spt5	0.773279472	0.392210672	0.979361123	2.50E-76	6.69E-72	Spt5	PREDICTED: transcription elongation factor SPT5-like [Hyalella azteca]	-	-	-	-	-	-	GO:0006355//regulation of transcription, DNA-templated
PH1	ncbi_113807660	PTGR1	0.527720509	0.238289854	1.147056529	4.87E-76	1.30E-71	PTGR1	protaglandin reductase 1 [Penaeus monodon]	-	-	-	-	-	-	-
PH1	ncbi_113813237	pen-2	4.284330008	3.044556191	0.49283767	5.55E-76	1.49E-71	pen-2	presenilin enhancer 2 [Litopenaeus vannamei]	Human Diseases;Environmental Information Processing	Neurodegenerative diseases;Signal transduction	ko05010//Alzheimer disease;ko04330//Notch signaling pathway	K06170;K06170	-	-	-
PH1	ncbi_113827271	rpa1	0.737490162	0.313653906	1.233450277	9.94E-75	2.66E-70	rpa1	PREDICTED: replication protein A 70 kDa DNA-binding subunit-like isoform X1 [Hyalella azteca]	Genetic Information Processing;Genetic Information Processing;Genetic Information Processing;Genetic Information Processing;Genetic Information Processing	Replication and repair;Replication and repair;Replication and repair;Replication and repair;Replication and repair	ko03460//Fanconi anemia pathway;ko03420//Nucleotide excision repair;ko03440//Homologous recombination;ko03030//DNA replication;ko03430//Mismatch repair	K07466;K07466;K07466;K07466;K07466	GO:0000228//nuclear chromosome	GO:0003677//DNA binding	GO:0006281//DNA repair;GO:0044707//single-multicellular organism process
PH1	ncbi_113804594	ddost	4.111813213	2.876444445	0.515488122	1.88E-74	5.03E-70	ddost	PREDICTED: dolichyl-diphosphooligosaccharide--protein glycosyltransferase 48 kDa subunit-like isoform X2 [Hyalella azteca]	Metabolism;Genetic Information Processing;Metabolism	Global and overview maps;Folding, sorting and degradation;Glycan biosynthesis and metabolism	ko01100//Metabolic pathways;ko04141//Protein processing in endoplasmic reticulum;ko00510//N-Glycan biosynthesis	K12670;K12670;K12670	GO:0032991//macromolecular complex;GO:0043231//intracellular membrane-bounded organelle;GO:0044425//membrane part	GO:0016740//transferase activity	GO:0006487//protein N-linked glycosylation;GO:0010033//response to organic substance;GO:0046649//lymphocyte activation
PH1	ncbi_113823360	BCAS2	1.515876353	0.890466597	0.767518681	2.30E-74	6.17E-70	BCAS2	PREDICTED: pre-mRNA-splicing factor SPF27-like [Hyalella azteca]	Genetic Information Processing	Transcription	ko03040//Spliceosome	K12861	-	-	-
PH1	ncbi_113817898	FKBP4	1.375025168	0.842240915	0.707153159	7.03E-74	1.88E-69	FKBP4	FK506-binding protein 4 [Zootermopsis nevadensis]	Organismal Systems	Endocrine system	ko04915//Estrogen signaling pathway	K09571	GO:0043227//membrane-bounded organelle;GO:0044424//intracellular part	GO:0005515//protein binding;GO:0097159//organic cyclic compound binding;GO:1901363//heterocyclic compound binding	GO:0003006//developmental process involved in reproduction;GO:0007275//multicellular organism development;GO:0009987//cellular process
PH1	ncbi_113828104	mfsd4b	0.483809166	0.197502427	1.29256772	8.73E-74	2.34E-69	mfsd4b	Sodium-dependent glucose transporter 1 [Zootermopsis nevadensis]	-	-	-	-	-	-	-
PH1	ncbi_113826178	REXO2	2.028442476	1.325132245	0.614236046	2.24E-73	6.00E-69	REXO2	PREDICTED: oligoribonuclease, mitochondrial-like [Hyalella azteca]	Genetic Information Processing	Translation	ko03008//Ribosome biogenesis in eukaryotes	K13288	GO:0043231//intracellular membrane-bounded organelle	GO:0004527//exonuclease activity;GO:0097159//organic cyclic compound binding	GO:0006139//nucleobase-containing compound metabolic process
PH1	ncbi_113826825	ncbi_113826825	2.994710381	2.144818851	0.481560682	2.34E-73	6.26E-69	--	-	-	-	-	-	-	-	-
PH1	ncbi_113825161	CYCS	6.179964387	4.397602306	0.490881383	8.76E-73	2.35E-68	CYCS	cytochrome c [Litopenaeus vannamei]	Human Diseases;Cellular Processes;Human Diseases;Human Diseases;Human Diseases;Human Diseases;Cellular Processes;Human Diseases;Human Diseases;Human Diseases;Human Diseases;Human Diseases;Human Diseases;Human Diseases;Human Diseases;Human Diseases;Human Diseases;Human Diseases;Cellular Processes;Human Diseases;Human Diseases;Cellular Processes	Cancers;Cell growth and death;Neurodegenerative diseases;Infectious diseases;Neurodegenerative diseases;Cardiovascular diseases;Cell growth and death;Endocrine and metabolic diseases;Neurodegenerative diseases;Infectious diseases;Infectious diseases;Infectious diseases;Drug resistance;Infectious diseases;Cancers;Infectious diseases;Infectious diseases;Cancers;Cell growth and death;Infectious dise…	ko05200//Pathways in cancer;ko04210//Apoptosis;ko05016//Huntington disease;ko05164//Influenza A;ko05010//Alzheimer disease;ko05416//Viral myocarditis;ko04214//Apoptosis - fly;ko04932//Non-alcoholic fatty liver disease (NAFLD);ko05012//Parkinson disease;ko05152//Tuberculosis;ko05168//Herpes simplex infection;ko05163//Human cytomegalovirus infection;ko01524//Platinum drug resistance;ko05145//Toxopl…	K08738;K08738;K08738;K08738;K08738;K08738;K08738;K08738;K08738;K08738;K08738;K08738;K08738;K08738;K08738;K08738;K08738;K08738;K08738;K08738;K08738;K08738	-	-	-
PH1	ncbi_113804039	ube2ib	2.331679747	1.522611711	0.61482157	1.61E-72	4.30E-68	ube2ib	ubiquitin-conjugating enzyme E2 c [Litopenaeus vannamei]	Genetic Information Processing;Genetic Information Processing;Human Diseases;Environmental Information Processing	Translation;Folding, sorting and degradation;Cancers;Signal transduction	ko03013//RNA transport;ko04120//Ubiquitin mediated proteolysis;ko05206//MicroRNAs in cancer;ko04064//NF-kappa B signaling pathway	K10577;K10577;K10577;K10577	-	GO:0019787//ubiquitin-like protein transferase activity	-
PH1	ncbi_113806953	lig	1.307065085	0.795093293	0.717134926	2.49E-72	6.66E-68	lig	PREDICTED: protein lingerer-like isoform X2 [Hyalella azteca]	-	-	-	-	-	-	-
PH1	ncbi_113809019	Tmed7	3.17329974	2.180849578	0.541093535	4.03E-72	1.08E-67	Tmed7	PREDICTED: transmembrane emp24 domain-containing protein 7-like [Nasonia vitripennis]	-	-	-	-	GO:0031224//intrinsic component of membrane	-	-
PH1	ncbi_113807651	l(2)k12914	8.711714174	6.650879167	0.389411561	7.44E-72	1.99E-67	l(2)k12914	defender against apoptotic death [Marsupenaeus japonicus]	Metabolism;Genetic Information Processing;Metabolism	Global and overview maps;Folding, sorting and degradation;Glycan biosynthesis and metabolism	ko01100//Metabolic pathways;ko04141//Protein processing in endoplasmic reticulum;ko00510//N-Glycan biosynthesis	K12668;K12668;K12668	GO:0031090//organelle membrane;GO:0031224//intrinsic component of membrane;GO:0043231//intracellular membrane-bounded organelle	GO:0003824//catalytic activity	GO:0006464//cellular protein modification process
PH1	ncbi_113828014	Tbp	0.69015226	0.351061552	0.975190682	9.48E-72	2.54E-67	Tbp	TATA-binding protein [Litopenaeus vannamei]	Human Diseases;Human Diseases;Human Diseases;Human Diseases;Human Diseases;Human Diseases;Genetic Information Processing	Infectious diseases;Neurodegenerative diseases;Infectious diseases;Cancers;Infectious diseases;Infectious diseases;Transcription	ko05165//Human papillomavirus infection;ko05016//Huntington disease;ko05166//HTLV-I infection;ko05203//Viral carcinogenesis;ko05169//Epstein-Barr virus infection;ko05168//Herpes simplex infection;ko03022//Basal transcription factors	K03120;K03120;K03120;K03120;K03120;K03120;K03120	-	-	-
PH1	ncbi_113829162	PDCL3	2.182242123	1.376889044	0.664398874	9.73E-72	2.61E-67	PDCL3	PREDICTED: viral IAP-associated factor homolog [Hyalella azteca]	-	-	-	-	-	-	-
PH1	ncbi_113809246	GINS3	1.400952961	0.823464342	0.766630432	1.16E-71	3.11E-67	GINS3	PREDICTED: DNA replication complex GINS protein PSF3-like [Hyalella azteca]	-	-	-	-	-	-	-
PH1	ncbi_113804544	ncbi_113804544	2.151573779	0.812629954	1.404721864	4.81E-71	1.29E-66	--	PDGF/VEGF-related factor 1 [Eriocheir sinensis]	Human Diseases;Human Diseases;Cellular Processes;Human Diseases;Environmental Information Processing;Environmental Information Processing;Human Diseases;Human Diseases;Environmental Information Processing;Environmental Information Processing;Organismal Systems;Human Diseases;Environmental Information Processing;Human Diseases;Human Diseases;Human Diseases;Human Diseases;Human Diseases;Human Disea…	Cancers;Infectious diseases;Cellular community - eukaryotes;Cancers;Signal transduction;Signal transduction;Cardiovascular diseases;Cancers;Signal transduction;Signal transduction;Endocrine system;Infectious diseases;Signal transduction;Endocrine and metabolic diseases;Infectious diseases;Cancers;Cancers;Drug resistance;Immune diseases;Cancers;Signal transduction	ko05200//Pathways in cancer;ko05165//Human papillomavirus infection;ko04510//Focal adhesion;ko05205//Proteoglycans in cancer;ko04151//PI3K-Akt signaling pathway;ko04015//Rap1 signaling pathway;ko05418//Fluid shear stress and atherosclerosis;ko05206//MicroRNAs in cancer;ko04010//MAPK signaling pathway;ko04014//Ras signaling pathway;ko04926//Relaxin signaling pathway;ko05163//Human cytomegalovirus …	K05448;K05448;K05448;K05448;K05448;K05448;K05448;K05448;K05448;K05448;K05448;K05448;K05448;K05448;K05448;K05448;K05448;K05448;K05448;K05448;K05448	-	-	-
PH1	ncbi_113816981	mzt1	0.589501716	0.298036161	0.984008627	6.47E-71	1.73E-66	mzt1	PREDICTED: mitotic-spindle organizing protein 1-like [Hyalella azteca]	-	-	-	-	-	-	-
PH1	ncbi_113809512	ncbi_113809512	0.569392938	0.281000929	1.018849698	1.29E-70	3.45E-66	--	-	-	-	-	-	-	-	-
PH1	ncbi_113818381	Taf11	1.099741031	0.619684511	0.827558022	2.45E-70	6.57E-66	Taf11	PREDICTED: transcription initiation factor TFIID subunit 11 [Fopius arisanus]	Genetic Information Processing	Transcription	ko03022//Basal transcription factors	K03135	-	-	-
PH1	ncbi_113809592	ilf2	1.215855681	0.721884562	0.752131938	4.84E-70	1.30E-65	ilf2	interleukin enhancer binding factor [Eriocheir sinensis]	-	-	-	-	-	GO:0003824//catalytic activity;GO:0032550//purine ribonucleoside binding	GO:0002376//immune system process
PH1	ncbi_113806266	SmF	3.304094539	2.360175275	0.485360964	1.26E-69	3.38E-65	SmF	PREDICTED: small nuclear ribonucleoprotein F-like [Hyalella azteca]	Genetic Information Processing	Transcription	ko03040//Spliceosome	K11098	GO:0030529//intracellular ribonucleoprotein complex;GO:0043231//intracellular membrane-bounded organelle;GO:0044423//virion part	-	GO:0006396//RNA processing
PH1	ncbi_113829486	ncbi_113829486	0.630010051	0.301444084	1.063484428	3.33E-69	8.92E-65	--	PREDICTED: mediator of RNA polymerase II transcription subunit 16-like [Hyalella azteca]	-	-	-	-	-	-	-
PH1	ncbi_113826815	PPIG	1.231870188	0.728627519	0.757596847	5.55E-69	1.49E-64	PPIG	PREDICTED: peptidyl-prolyl cis-trans isomerase cyp11 isoform X1 [Wasmannia auropunctata]	-	-	-	-	-	-	-
PH1	ncbi_113809067	ncl1	2.357108751	1.616506217	0.544139267	1.14E-68	3.06E-64	ncl1	Nicalin-1 [Crassostrea gigas]	-	-	-	-	-	-	-
PH1	ncbi_113824991	paxip1	0.686103433	0.373647369	0.876748721	1.40E-68	3.74E-64	paxip1	PREDICTED: PAX-interacting protein 1 [Nasonia vitripennis]	-	-	-	-	-	-	-
PH1	ncbi_113817819	UBE2F	0.698121621	0.377476146	0.887092913	1.46E-68	3.90E-64	UBE2F	PREDICTED: NEDD8-conjugating enzyme UBE2F-like [Hyalella azteca]	Genetic Information Processing	Folding, sorting and degradation	ko04120//Ubiquitin mediated proteolysis	K10687	-	-	-
PH1	ncbi_113804219	cript	1.724287622	1.105917639	0.640756497	1.81E-68	4.86E-64	cript	PREDICTED: cysteine-rich PDZ-binding protein-like [Hyalella azteca]	-	-	-	-	-	-	-
PH1	ncbi_113817395	Mcee	1.108570351	0.664155058	0.739108322	1.93E-68	5.17E-64	Mcee	PREDICTED: methylmalonyl-CoA epimerase, mitochondrial isoform X1 [Austrofundulus limnaeus]	Metabolism;Metabolism;Metabolism;Metabolism;Metabolism	Global and overview maps;Global and overview maps;Amino acid metabolism;Carbohydrate metabolism;Carbohydrate metabolism	ko01100//Metabolic pathways;ko01200//Carbon metabolism;ko00280//Valine, leucine and isoleucine degradation;ko00630//Glyoxylate and dicarboxylate metabolism;ko00640//Propanoate metabolism	K05606;K05606;K05606;K05606;K05606	GO:0043231//intracellular membrane-bounded organelle	-	GO:0015936//coenzyme A metabolic process
PH1	ncbi_113828758	ncbi_113828758	0.583643828	0.272896964	1.096731878	7.89E-68	2.11E-63	--	-	-	-	-	-	-	-	-
PH1	ncbi_113814234	ncbi_113814234	2.229520284	1.46128164	0.609499063	1.02E-67	2.73E-63	--	-	-	-	-	-	-	-	-
PH1	ncbi_113803802	TSTA3	1.084263966	0.635931483	0.769772787	1.64E-67	4.38E-63	TSTA3	PREDICTED: GDP-L-fucose synthase isoform X1 [Nanorana parkeri]	Metabolism;Metabolism;Metabolism	Global and overview maps;Carbohydrate metabolism;Carbohydrate metabolism	ko01100//Metabolic pathways;ko00520//Amino sugar and nucleotide sugar metabolism;ko00051//Fructose and mannose metabolism	K02377;K02377;K02377	-	GO:0016616//oxidoreductase activity, acting on the CH-OH group of donors, NAD or NADP as acceptor;GO:0048037//cofactor binding	GO:0042350//GDP-L-fucose biosynthetic process
PH1	ncbi_113802830	inf2	0.551719357	0.252200735	1.129362118	3.10E-67	8.31E-63	inf2	PREDICTED: inverted formin-2 isoform X1 [Ornithorhynchus anatinus]	-	-	-	-	GO:0005737//cytoplasm	-	GO:0009987//cellular process;GO:0016043//cellular component organization
PH1	ncbi_113803881	holn1	0.671747386	0.364571813	0.881715778	3.24E-67	8.66E-63	holn1	PREDICTED: CD2 antigen cytoplasmic tail-binding protein 2 homolog [Hyalella azteca]	-	-	-	-	-	-	-
PH1	ncbi_113819729	hpo-8	0.577836095	0.271794858	1.088142165	1.66E-66	4.46E-62	hpo-8	PREDICTED: very-long-chain (3R)-3-hydroxyacyl-CoA dehydratase 1-like [Hyalella azteca]	Metabolism;Metabolism;Metabolism;Metabolism	Global and overview maps;Global and overview maps;Lipid metabolism;Lipid metabolism	ko01100//Metabolic pathways;ko01212//Fatty acid metabolism;ko00062//Fatty acid elongation;ko01040//Biosynthesis of unsaturated fatty acids	K10703;K10703;K10703;K10703	-	-	-
PH1	ncbi_113803127	Tstd3	0.564942651	0.286298676	0.980583423	1.81E-66	4.85E-62	Tstd3	PREDICTED: 3-mercaptopyruvate sulfurtransferase-like [Hyalella azteca]	-	-	-	-	-	-	-
PH1	ncbi_113823788	ncbi_113823788	0.660843412	0.359850404	0.876911185	2.31E-66	6.19E-62	--	PREDICTED: proteasome assembly chaperone 1 [Latimeria chalumnae]	-	-	-	-	-	-	-
PH1	ncbi_113824315	7-Sep	0.688840001	0.36290279	0.924585776	2.61E-66	7.00E-62	7-Sep	PREDICTED: septin-7-like isoform X3 [Hyalella azteca]	-	-	-	-	-	GO:0032550//purine ribonucleoside binding	GO:0044763//single-organism cellular process
PH1	ncbi_113823180	ncbi_113823180	2.891961999	2.037345316	0.505358068	4.51E-66	1.21E-61	--	-	-	-	-	-	-	-	-
PH1	ncbi_113823506	SmE	2.428088802	1.644069708	0.562549716	1.29E-65	3.46E-61	SmE	PREDICTED: probable small nuclear ribonucleoprotein E [Hyalella azteca]	Genetic Information Processing	Transcription	ko03040//Spliceosome	K11097	GO:0030529//intracellular ribonucleoprotein complex	-	-
PH1	ncbi_113799903	PPIL3	0.937191724	0.535173444	0.808337685	1.39E-65	3.71E-61	PPIL3	PREDICTED: peptidyl-prolyl cis-trans isomerase-like 3 [Neodiprion lecontei]	-	-	-	-	-	GO:0016859//cis-trans isomerase activity	GO:0044267//cellular protein metabolic process
PH1	ncbi_113826276	ncbi_113826276	1.490387017	0.99104461	0.588665108	2.42E-65	6.49E-61	--	PREDICTED: protein C9orf72 homolog [Hyalella azteca]	-	-	-	-	-	-	-
PH1	ncbi_113827277	ncbi_113827277	5.319054842	3.859618436	0.462711683	5.00E-65	1.34E-60	--	trap [Procambarus clarkii]	Genetic Information Processing	Folding, sorting and degradation	ko04141//Protein processing in endoplasmic reticulum	K04571	-	-	-
PH1	ncbi_113820236	NUP54	0.59163504	0.334512553	0.822647148	3.54E-64	9.48E-60	NUP54	PREDICTED: nucleoporin p54 isoform X2 [Callorhinchus milii]	Genetic Information Processing	Translation	ko03013//RNA transport	K14308	-	-	-
PH1	ncbi_113827377	ARID4B	0.699793112	0.384536299	0.863808676	5.53E-64	1.48E-59	ARID4B	AT-rich interactive domain-containing protein 4B [Daphnia magna]	Human Diseases	Infectious diseases	ko05134//Legionellosis	K07874	-	-	-
PH1	ncbi_113808687	tmx3	0.514872477	0.238099823	1.112648602	1.50E-63	4.03E-59	tmx3	Thioredoxin [Oryctes borbonicus]	-	-	-	-	-	-	-
PH1	ncbi_113810854	Cct8	4.879655741	3.650890858	0.418530829	1.67E-63	4.48E-59	Cct8	PREDICTED: T-complex protein 1 subunit theta-like [Hyalella azteca]	-	-	-	-	GO:0044424//intracellular part	GO:0005515//protein binding;GO:0032550//purine ribonucleoside binding	GO:0044267//cellular protein metabolic process
PH1	ncbi_113824224	Zmat2	2.389193845	1.648822593	0.535087731	2.90E-63	7.76E-59	Zmat2	PREDICTED: zinc finger matrin-type protein 2 [Oryzias latipes]	Genetic Information Processing	Transcription	ko03040//Spliceosome	K12848	GO:0043231//intracellular membrane-bounded organelle	GO:0003676//nucleic acid binding;GO:0046914//transition metal ion binding	-
PH1	ncbi_113803427	CG40228	0.836983172	0.507250099	0.722501375	6.71E-63	1.80E-58	CG40228	PREDICTED: transcription elongation factor 1 homolog [Diaphorina citri]	-	-	-	-	-	-	-
PH1	ncbi_113809417	rap1b	5.39858906	4.019524347	0.425557614	9.63E-63	2.58E-58	rap1b	Rap GTPase [Marsupenaeus japonicus]	Cellular Processes;Cellular Processes;Environmental Information Processing;Organismal Systems;Environmental Information Processing;Organismal Systems;Environmental Information Processing;Environmental Information Processing;Organismal Systems;Human Diseases;Organismal Systems;Organismal Systems;Human Diseases;Organismal Systems	Cellular community - eukaryotes;Cellular community - eukaryotes;Signal transduction;Immune system;Signal transduction;Digestive system;Signal transduction;Signal transduction;Immune system;Endocrine and metabolic diseases;Immune system;Nervous system;Cancers;Nervous system	ko04510//Focal adhesion;ko04530//Tight junction;ko04015//Rap1 signaling pathway;ko04611//Platelet activation;ko04010//MAPK signaling pathway;ko04972//Pancreatic secretion;ko04024//cAMP signaling pathway;ko04014//Ras signaling pathway;ko04670//Leukocyte transendothelial migration;ko04934//Cushing syndrome;ko04062//Chemokine signaling pathway;ko04722//Neurotrophin signaling pathway;ko05211//Renal c…	K04353;K04353;K04353;K04353;K04353;K04353;K04353;K04353;K04353;K04353;K04353;K04353;K04353;K04353	-	-	-
PH1	ncbi_113814312	ncbi_113814312	0.64020018	0.349826871	0.871881974	1.11E-62	2.97E-58	--	-	-	-	-	-	-	-	-
PH1	ncbi_113815936	ncbi_113815936	0.480851347	0.253557185	0.923279802	1.16E-62	3.12E-58	--	PREDICTED: protein cereblon homolog [Cephus cinctus]	-	-	-	-	-	-	-
PH1	ncbi_113822768	Clpp	1.419906758	0.887801598	0.677486985	2.02E-62	5.40E-58	Clpp	PREDICTED: ATP-dependent Clp protease proteolytic subunit-like [Hyalella azteca]	Organismal Systems	Aging	ko04212//Longevity regulating pathway - worm	K01358	-	GO:0070011//peptidase activity, acting on L-amino acid peptides	GO:0019538//protein metabolic process
PH1	ncbi_113818095	HNRNP	0.460066665	0.206820046	1.153466904	3.57E-62	9.55E-58	HNRNP	PREDICTED: heterogeneous nuclear ribonucleoprotein A1, A2/B1 homolog, partial [Hyalella azteca]	Genetic Information Processing	Transcription	ko03040//Spliceosome	K12741	-	-	-
PH1	ncbi_113807359	HDAC1	0.791882742	0.434958565	0.864408845	4.03E-62	1.08E-57	HDAC1	PREDICTED: histone deacetylase Rpd3-like [Hyalella azteca]	Human Diseases;Human Diseases;Organismal Systems;Human Diseases;Human Diseases;Human Diseases;Organismal Systems;Human Diseases;Human Diseases;Human Diseases;Cellular Processes;Human Diseases;Human Diseases;Environmental Information Processing	Cancers;Infectious diseases;Endocrine system;Neurodegenerative diseases;Cancers;Cancers;Aging;Substance dependence;Cancers;Infectious diseases;Cell growth and death;Cancers;Substance dependence;Signal transduction	ko05200//Pathways in cancer;ko05165//Human papillomavirus infection;ko04919//Thyroid hormone signaling pathway;ko05016//Huntington disease;ko05202//Transcriptional misregulation in cancers;ko05206//MicroRNAs in cancer;ko04213//Longevity regulating pathway - multiple species;ko05034//Alcoholism;ko05203//Viral carcinogenesis;ko05169//Epstein-Barr virus infection;ko04110//Cell cycle;ko05220//Chronic…	K06067;K06067;K06067;K06067;K06067;K06067;K06067;K06067;K06067;K06067;K06067;K06067;K06067;K06067	-	-	-
PH1	ncbi_113806783	ncbi_113806783	0.983198083	0.583291394	0.753265314	4.12E-62	1.10E-57	--	-	-	-	-	-	-	-	-
PH1	ncbi_113808105	ncbi_113808105	0.510548966	0.265128529	0.945357416	6.14E-62	1.64E-57	--	PREDICTED: protein tramtrack, beta isoform-like, partial [Rhagoletis zephyria]	-	-	-	-	-	-	GO:0008152//metabolic process
PH1	ncbi_113808603	chst14	0.455425241	0.239164453	0.929211275	7.41E-62	1.99E-57	chst14	PREDICTED: carbohydrate sulfotransferase 11 isoform X2 [Ceratitis capitata]	Metabolism	Glycan biosynthesis and metabolism	ko00532//Glycosaminoglycan biosynthesis - chondroitin sulfate / dermatan sulfate	K01017	-	-	-
PH1	ncbi_113812736	ncbi_113812736	0.628393122	0.343284814	0.872261349	7.49E-62	2.01E-57	--	-	-	-	-	-	-	-	-
PH1	ncbi_113819094	Cdc37	1.363294621	0.832404893	0.711740025	1.01E-61	2.70E-57	Cdc37	PREDICTED: hsp90 co-chaperone Cdc37 [Anoplophora glabripennis]	Environmental Information Processing	Signal transduction	ko04151//PI3K-Akt signaling pathway	K09554	-	-	GO:0044763//single-organism cellular process
PH1	ncbi_113800955	ncbi_113800955	0.733747032	0.402197449	0.867378831	3.04E-61	8.14E-57	--	PREDICTED: zinc finger protein 615-like [Hyalella azteca]	-	-	-	-	-	-	-
PH1	ncbi_113806207	Psma1	2.725968388	1.919329438	0.506166471	3.48E-61	9.32E-57	Psma1	PREDICTED: proteasome subunit alpha type-1-like [Hyalella azteca]	Genetic Information Processing	Folding, sorting and degradation	ko03050//Proteasome	K02725	-	-	-
PH1	ncbi_113819827	PBRM1	0.573733645	0.312094319	0.878399028	4.67E-61	1.25E-56	PBRM1	PREDICTED: protein polybromo-1-like [Hyalella azteca]	Human Diseases	Cancers	ko05225//Hepatocellular carcinoma	K11757	-	-	-
PH1	ncbi_113830103	zip	4.862335578	3.690908985	0.397673303	2.37E-60	6.35E-56	zip	PREDICTED: myosin heavy chain, non-muscle-like isoform X5 [Hyalella azteca]	Cellular Processes;Cellular Processes;Human Diseases;Organismal Systems	Cell motility;Cellular community - eukaryotes;Infectious diseases;Circulatory system	ko04810//Regulation of actin cytoskeleton;ko04530//Tight junction;ko05132//Salmonella infection;ko04270//Vascular smooth muscle contraction	K10352;K10352;K10352;K10352	-	-	-
PH1	ncbi_113821239	seh1l	0.722366115	0.395848182	0.867782993	7.96E-60	2.13E-55	seh1l	PREDICTED: nucleoporin seh1-A isoform X2 [Neodiprion lecontei]	Genetic Information Processing;Environmental Information Processing	Translation;Signal transduction	ko03013//RNA transport;ko04150//mTOR signaling pathway	K14299;K14299	-	-	-
PH1	ncbi_113829134	FAM32A	1.914455589	1.332747555	0.522530658	8.33E-60	2.23E-55	FAM32A	PREDICTED: protein FAM32A [Tribolium castaneum]	-	-	-	-	-	-	-
PH1	ncbi_113801277	NME7	0.538251155	0.261023824	1.044098023	9.00E-60	2.41E-55	NME7	PREDICTED: nucleoside diphosphate kinase 7-like [Branchiostoma belcheri]	Metabolism;Metabolism;Metabolism;Metabolism	Global and overview maps;Nucleotide metabolism;Xenobiotics biodegradation and metabolism;Nucleotide metabolism	ko01100//Metabolic pathways;ko00230//Purine metabolism;ko00983//Drug metabolism - other enzymes;ko00240//Pyrimidine metabolism	K00940;K00940;K00940;K00940	-	GO:0016772//transferase activity, transferring phosphorus-containing groups	GO:0009209//pyrimidine ribonucleoside triphosphate biosynthetic process;GO:0009260//ribonucleotide biosynthetic process;GO:1901566//organonitrogen compound biosynthetic process
PH1	ncbi_113808083	OXA1L	0.443697512	0.216821145	1.033071003	9.91E-60	2.65E-55	OXA1L	PREDICTED: mitochondrial inner membrane protein OXA1L [Musca domestica]	Genetic Information Processing	Folding, sorting and degradation	ko03060//Protein export	K03217	GO:0031224//intrinsic component of membrane	-	GO:0090150//establishment of protein localization to membrane
PH1	ncbi_113824583	cutC	1.078203002	0.664183527	0.698974985	1.05E-59	2.82E-55	cutC	PREDICTED: copper homeostasis protein cutC homolog isoform X1 [Hyalella azteca]	-	-	-	-	-	-	-
PH1	ncbi_113815109	smpd5	0.531895159	0.272232667	0.966301713	1.06E-59	2.85E-55	smpd5	Sphingomyelin phosphodiesterase 3 [Daphnia magna]	Metabolism;Metabolism	Global and overview maps;Nucleotide metabolism	ko01100//Metabolic pathways;ko00240//Pyrimidine metabolism	K00254;K00254	-	-	-
PH1	ncbi_113805571	cni	1.588679957	1.066127587	0.57544842	2.61E-59	6.99E-55	cni	PREDICTED: protein cornichon-like [Hyalella azteca]	-	-	-	-	-	-	GO:0007165//signal transduction
PH1	ncbi_113806872	AAEL008004	2.114429676	1.44576481	0.548435697	5.69E-59	1.52E-54	AAEL008004	elongation of very long chain fatty acids-like protein [Marsupenaeus japonicus]	-	-	-	-	-	-	-
PH1	ncbi_113828312	sod-2	1.038652062	0.614600088	0.756992568	7.44E-59	1.99E-54	sod-2	mitochondrial manganese superoxide dismutase [Fenneropenaeus chinensis]	Human Diseases;Environmental Information Processing;Organismal Systems;Cellular Processes;Environmental Information Processing;Organismal Systems;Organismal Systems	Neurodegenerative diseases;Signal transduction;Aging;Transport and catabolism;Signal transduction;Aging;Aging	ko05016//Huntington disease;ko04013//MAPK signaling pathway - fly;ko04213//Longevity regulating pathway - multiple species;ko04146//Peroxisome;ko04068//FoxO signaling pathway;ko04212//Longevity regulating pathway - worm;ko04211//Longevity regulating pathway - mammal	K04564;K04564;K04564;K04564;K04564;K04564;K04564	-	-	-
PH1	ncbi_113826594	ncbi_113826594	0.472882274	0.264566602	0.837850111	2.44E-58	6.53E-54	--	-	-	-	-	-	-	-	-
PH1	ncbi_113802689	Hirip3	1.481532594	0.93461891	0.664640235	1.24E-57	3.31E-53	Hirip3	PREDICTED: protein starmaker-like [Parasteatoda tepidariorum]	-	-	-	-	-	-	-
PH1	ncbi_113827409	rsp-7	0.954590164	0.557487028	0.775943235	1.25E-57	3.34E-53	rsp-7	PREDICTED: probable splicing factor, arginine/serine-rich 7 [Hyalella azteca]	-	-	-	-	-	-	-
PH1	ncbi_113820250	CEBPB	3.073313782	2.195901943	0.484981439	1.87E-57	5.01E-53	CEBPB	PREDICTED: CCAAT/enhancer-binding protein epsilon-like [Hyalella azteca]	-	-	-	-	-	-	-
PH1	ncbi_113809356	csn8	0.929711318	0.563399251	0.722625172	2.54E-57	6.81E-53	csn8	PREDICTED: COP9 signalosome complex subunit 8-like [Lingula anatina]	-	-	-	-	GO:0044424//intracellular part	-	-
PH1	ncbi_113800333	CLNS1A	1.231878336	0.782618315	0.654479001	3.26E-57	8.74E-53	CLNS1A	PREDICTED: methylosome subunit pICln [Apis florea]	Genetic Information Processing	Translation	ko03013//RNA transport	K05019	GO:0043234//protein complex;GO:0044444//cytoplasmic part	-	GO:0044699//single-organism process
PH1	ncbi_113805532	PDIA3	4.14660969	3.080320623	0.428851731	7.90E-57	2.12E-52	PDIA3	endoplasmic reticulum protein 57 [Penaeus monodon]	Genetic Information Processing;Human Diseases;Organismal Systems	Folding, sorting and degradation;Infectious diseases;Immune system	ko04141//Protein processing in endoplasmic reticulum;ko05163//Human cytomegalovirus infection;ko04612//Antigen processing and presentation	K08056;K08056;K08056	-	GO:0016740//transferase activity	GO:0008152//metabolic process;GO:0009987//cellular process
PH1	ncbi_113822211	dom	2.508978565	1.835920043	0.450596917	1.01E-56	2.69E-52	dom	PREDICTED: helicase domino isoform X3 [Orussus abietinus]	-	-	-	-	-	-	-
PH1	ncbi_113810125	KIF2A	0.734207685	0.367933497	0.996743189	1.95E-56	5.23E-52	KIF2A	PREDICTED: kinesin-like protein KIF2A isoform X2 [Hyalella azteca]	-	-	-	-	-	-	-
PH1	ncbi_113822950	uba2	0.461403197	0.237601626	0.95748329	2.10E-56	5.63E-52	uba2	PREDICTED: SUMO-activating enzyme subunit 2-like [Limulus polyphemus]	Genetic Information Processing	Folding, sorting and degradation	ko04120//Ubiquitin mediated proteolysis	K10685	-	-	-
PH1	ncbi_113819695	ncbi_113819695	0.755076074	0.436447041	0.790815398	2.37E-56	6.34E-52	--	-	-	-	-	-	-	-	-
PH1	ncbi_113821321	PHPT1	2.633934796	1.900360877	0.47094622	1.86E-55	4.99E-51	PHPT1	PREDICTED: 14 kDa phosphohistidine phosphatase-like [Hyalella azteca]	-	-	-	-	-	-	-
PH1	ncbi_113803914	Golt1b	0.801395492	0.461954238	0.794764454	1.91E-55	5.12E-51	Golt1b	PREDICTED: vesicle transport protein GOT1B-like [Hyalella azteca]	-	-	-	-	-	-	-
PH1	ncbi_113804316	tmem147	2.093026873	1.456097468	0.523483905	3.64E-55	9.75E-51	tmem147	PREDICTED: transmembrane protein 147-like [Hyalella azteca]	-	-	-	-	-	-	-
PH1	ncbi_113820491	AGAP012180	0.457938116	0.234628939	0.964771689	7.31E-55	1.96E-50	AGAP012180	PREDICTED: transmembrane protein 234-like [Saccoglossus kowalevskii]	-	-	-	-	-	-	-
PH1	ncbi_113800021	HASPIN	0.752857699	0.447949672	0.749040549	9.38E-55	2.51E-50	HASPIN	Putative serine/threonine-protein kinase, partial [Anoplophora glabripennis]	-	-	-	-	-	-	-
PH1	ncbi_113815243	pelo	3.229973015	2.331910271	0.470009836	2.72E-54	7.28E-50	pelo	PREDICTED: protein pelota [Anoplophora glabripennis]	Genetic Information Processing	Translation	ko03015//mRNA surveillance pathway	K06965	-	-	GO:0000956//nuclear-transcribed mRNA catabolic process
PH1	ncbi_113804806	ALOX5	0.531764129	0.2760853	0.945672386	2.89E-54	7.74E-50	ALOX5	lipoxygenase [Penaeus monodon]	Metabolism;Human Diseases;Organismal Systems;Metabolism;Organismal Systems;Organismal Systems	Global and overview maps;Infectious diseases;Nervous system;Lipid metabolism;Endocrine system;Immune system	ko01100//Metabolic pathways;ko05145//Toxoplasmosis;ko04726//Serotonergic synapse;ko00590//Arachidonic acid metabolism;ko04913//Ovarian Steroidogenesis;ko04664//Fc epsilon RI signaling pathway	K00461;K00461;K00461;K00461;K00461;K00461	-	-	-
PH1	ncbi_113824921	Ntmt	0.477420978	0.25597481	0.899260118	2.94E-54	7.89E-50	Ntmt	methyltransferase-like protein 11A [Coptotermes formosanus]	-	-	-	-	-	-	-
PH1	ncbi_113818185	ZNHIT1	1.303033562	0.851407616	0.613952343	5.79E-54	1.55E-49	ZNHIT1	PREDICTED: zinc finger HIT domain-containing protein 1-like isoform X2 [Hyalella azteca]	-	-	-	-	-	-	-
PH1	ncbi_113811523	B52	2.266058999	1.605584104	0.497087185	7.08E-54	1.89E-49	B52	hnRNP protein, partial [Cherax quadricarinatus]	Genetic Information Processing;Human Diseases	Transcription;Infectious diseases	ko03040//Spliceosome;ko05168//Herpes simplex infection	K12893;K12893	-	GO:0003676//nucleic acid binding	GO:0048024//regulation of mRNA splicing, via spliceosome
PH1	ncbi_113828351	Cdk11b	0.769619042	0.456968157	0.752050858	2.35E-53	6.29E-49	Cdk11b	PREDICTED: cyclin-dependent kinase 11B-like isoform X1 [Hyalella azteca]	-	-	-	-	-	GO:0004672//protein kinase activity;GO:0032550//purine ribonucleoside binding	GO:0006464//cellular protein modification process;GO:0007166//cell surface receptor signaling pathway
PH1	ncbi_113821859	Cacybp	2.671396916	1.955999124	0.449688624	2.56E-53	6.85E-49	Cacybp	PREDICTED: calcyclin-binding protein [Cephus cinctus]	Environmental Information Processing	Signal transduction	ko04310//Wnt signaling pathway	K04507	-	-	-
PH1	ncbi_113818098	Max	2.692993929	1.97062941	0.450554484	2.69E-53	7.19E-49	Max	PREDICTED: protein max isoform X1 [Ceratina calcarata]	Human Diseases;Human Diseases;Environmental Information Processing;Human Diseases	Cancers;Cancers;Signal transduction;Cancers	ko05200//Pathways in cancer;ko05202//Transcriptional misregulation in cancers;ko04010//MAPK signaling pathway;ko05222//Small cell lung cancer	K04453;K04453;K04453;K04453	GO:0043231//intracellular membrane-bounded organelle	GO:0005515//protein binding	GO:0010468//regulation of gene expression
PH1	ncbi_113807867	Vrk1	0.66630058	0.377910034	0.818130324	8.70E-53	2.33E-48	Vrk1	PREDICTED: serine/threonine-protein kinase VRK1-like [Hyalella azteca]	-	-	-	-	-	GO:0004674//protein serine/threonine kinase activity	GO:0006796//phosphate-containing compound metabolic process
PH1	ncbi_113804927	Cbp20	1.285721859	0.843038025	0.608908967	1.06E-52	2.84E-48	Cbp20	PREDICTED: nuclear cap-binding protein subunit 2-like [Dendroctonus ponderosae]	Genetic Information Processing;Genetic Information Processing;Genetic Information Processing	Translation;Transcription;Translation	ko03013//RNA transport;ko03040//Spliceosome;ko03015//mRNA surveillance pathway	K12883;K12883;K12883	-	-	-
PH1	ncbi_113813350	thoc7	0.691575096	0.392412682	0.817514253	1.16E-52	3.09E-48	thoc7	PREDICTED: THO complex subunit 7 homolog [Hyalella azteca]	Genetic Information Processing	Translation	ko03013//RNA transport	K13176	-	-	-
PH1	ncbi_113818824	HSD17B12	0.635750498	0.360391418	0.818896031	1.24E-52	3.32E-48	HSD17B12	PREDICTED: very-long-chain 3-oxoacyl-CoA reductase-like [Hyalella azteca]	Metabolism;Metabolism;Metabolism;Metabolism;Metabolism	Global and overview maps;Global and overview maps;Lipid metabolism;Lipid metabolism;Lipid metabolism	ko01100//Metabolic pathways;ko01212//Fatty acid metabolism;ko00140//Steroid hormone biosynthesis;ko00062//Fatty acid elongation;ko01040//Biosynthesis of unsaturated fatty acids	K10251;K10251;K10251;K10251;K10251	-	-	-
PH1	ncbi_113820062	Fut1	0.877772898	0.550889143	0.672085696	1.33E-52	3.57E-48	Fut1	Galactoside 2-alpha-L-fucosyltransferase 2 [Daphnia magna]	Metabolism;Metabolism;Metabolism	Global and overview maps;Glycan biosynthesis and metabolism;Glycan biosynthesis and metabolism	ko01100//Metabolic pathways;ko00601//Glycosphingolipid biosynthesis - lacto and neolacto series;ko00603//Glycosphingolipid biosynthesis - globo and isoglobo series	K00718;K00718;K00718	-	-	-
PH1	ncbi_113802461	Sf3a2	0.689764603	0.396016719	0.800542759	1.95E-52	5.21E-48	Sf3a2	PREDICTED: splicing factor 3A subunit 2-like [Hyalella azteca]	Genetic Information Processing	Transcription	ko03040//Spliceosome	K12826	GO:0005681//spliceosomal complex	GO:0003723//RNA binding;GO:0046914//transition metal ion binding	-
PH1	ncbi_113816540	ncbi_113816540	0.575265956	0.363346509	0.662883052	2.14E-52	5.72E-48	--	PREDICTED: uncharacterized protein LOC108682462 [Hyalella azteca]	-	-	-	-	-	-	-
PH1	ncbi_113802433	frg1	0.48004225	0.250389976	0.938984583	2.35E-52	6.29E-48	frg1	PREDICTED: protein FRG1 homolog [Hyalella azteca]	-	-	-	-	-	-	-
PH1	ncbi_113809520	arl6ip4	0.517850677	0.265802476	0.96218161	4.18E-52	1.12E-47	arl6ip4	ADP-ribosylation factor-like protein 6-interacting protein 4 [Zootermopsis nevadensis]	-	-	-	-	-	-	-
PH1	ncbi_113820082	MAD1L1	0.590659896	0.335052142	0.81794203	6.61E-52	1.77E-47	MAD1L1	PREDICTED: mitotic spindle assembly checkpoint protein MAD1-like [Hyalella azteca]	Human Diseases;Cellular Processes;Organismal Systems	Cancers;Cell growth and death;Endocrine system	ko05203//Viral carcinogenesis;ko04110//Cell cycle;ko04914//Progesterone-mediated oocyte maturation	K06638;K06638;K06638	-	-	-
PH1	ncbi_113804244	Ik	0.824732777	0.504963844	0.707746653	2.40E-51	6.43E-47	Ik	PREDICTED: protein Red-like [Hyalella azteca]	-	-	-	-	GO:0031981//nuclear lumen;GO:0043232//intracellular non-membrane-bounded organelle;GO:0044421//extracellular region part	GO:0005515//protein binding	GO:0002376//immune system process;GO:0007154//cell communication
PH1	ncbi_113825931	Rbm25	1.357170988	0.92575625	0.551898206	2.92E-51	7.82E-47	Rbm25	PREDICTED: RNA-binding protein 25-like isoform X2 [Halyomorpha halys]	Genetic Information Processing	Transcription	ko03040//Spliceosome	K12822	GO:0016604//nuclear body	GO:0003723//RNA binding	GO:0006915//apoptotic process;GO:0048024//regulation of mRNA splicing, via spliceosome
PH1	ncbi_113829281	MED11	0.629895849	0.352430533	0.837774387	6.88E-51	1.84E-46	MED11	Mediator of RNA polymerase II transcription subunit 11 [Zootermopsis nevadensis]	-	-	-	-	-	-	GO:0006351//transcription, DNA-templated
PH1	ncbi_113805239	paxt-1	0.711425663	0.42611076	0.739484536	9.99E-51	2.67E-46	paxt-1	PREDICTED: NF-kappa-B-repressing factor [Diachasma alloeum]	-	-	-	-	-	-	-
PH1	ncbi_113809606	lin52	0.403739527	0.213999789	0.915815464	1.30E-50	3.49E-46	lin52	PREDICTED: protein lin-52 homolog [Hyalella azteca]	-	-	-	-	-	-	-
PH1	ncbi_113814264	EMC4	1.65797321	1.11523984	0.57206669	2.48E-50	6.63E-46	EMC4	PREDICTED: ER membrane protein complex subunit 4 [Halyomorpha halys]	-	-	-	-	-	-	-
PH1	ncbi_113803611	SAFB2	1.015590944	0.652593484	0.638062948	3.44E-50	9.22E-46	SAFB2	PREDICTED: SAFB-like transcription modulator isoform X1 [Musca domestica]	-	-	-	-	-	-	-
PH1	ncbi_113817432	mlec	0.45497045	0.234046744	0.958976151	5.78E-50	1.55E-45	mlec	Malectin-B [Zootermopsis nevadensis]	-	-	-	-	-	-	-
PH1	ncbi_113805139	VAPA	1.497033176	0.969571378	0.626687178	8.57E-50	2.29E-45	VAPA	TPA_exp: VAMP-associated protein [Amblyomma variegatum]	Organismal Systems	Digestive system	ko04979//Cholesterol metabolism	K10707	-	-	-
PH1	ncbi_113806734	mrpl20	1.712823168	1.189130834	0.52646876	1.86E-49	4.97E-45	mrpl20	PREDICTED: 39S ribosomal protein L20, mitochondrial [Orussus abietinus]	Genetic Information Processing	Translation	ko03010//Ribosome	K02887	-	-	-
PH1	ncbi_113816769	ncbi_113816769	3.810143318	2.907635273	0.389998953	3.22E-49	8.62E-45	--	PREDICTED: NADH dehydrogenase [ubiquinone] iron-sulfur protein 5 [Drosophila elegans]	-	-	-	-	-	-	-
PH1	ncbi_113804311	mmgt1	5.00015685	3.882673692	0.364922886	3.73E-49	9.98E-45	mmgt1	Membrane magnesium transporter 1-B [Zootermopsis nevadensis]	-	-	-	-	-	-	-
PH1	ncbi_113817273	ncbi_113817273	0.763733082	0.438272887	0.801239087	4.10E-49	1.10E-44	--	-	-	-	-	-	-	-	-
PH1	ncbi_113804584	ncbi_113804584	0.486435561	0.246491211	0.980712493	4.72E-49	1.26E-44	--	-	-	-	-	-	-	-	-
PH1	ncbi_113830350	Prpf18	0.81962182	0.495227075	0.7268682	4.83E-49	1.29E-44	Prpf18	PREDICTED: pre-mRNA-splicing factor 18-like [Hyalella azteca]	Genetic Information Processing	Transcription	ko03040//Spliceosome	K12817	-	-	-
PH1	ncbi_113824055	YEATS4	0.522310888	0.306148188	0.770678635	6.12E-49	1.64E-44	YEATS4	PREDICTED: YEATS domain-containing protein 4-like [Limulus polyphemus]	-	-	-	-	-	-	-
PH1	ncbi_113811664	ncbi_113811664	0.561297442	0.309106914	0.86065956	8.33E-49	2.23E-44	--	PREDICTED: apoptosis regulatory protein Siva [Camponotus floridanus]	-	-	-	-	-	-	-
PH1	ncbi_113823100	ncbi_113823100	0.527243147	0.279800364	0.914070599	9.40E-49	2.52E-44	--	PREDICTED: mucin-17 isoform X2 [Harpegnathos saltator]	-	-	-	-	-	-	-
PH1	ncbi_113809401	SEC61B	10.08137862	7.660632935	0.39615744	1.31E-48	3.51E-44	SEC61B	PREDICTED: protein transport protein Sec61 subunit beta [Polistes canadensis]	Genetic Information Processing;Cellular Processes;Human Diseases;Genetic Information Processing	Folding, sorting and degradation;Transport and catabolism;Infectious diseases;Folding, sorting and degradation	ko04141//Protein processing in endoplasmic reticulum;ko04145//Phagosome;ko05110//Vibrio cholerae infection;ko03060//Protein export	K09481;K09481;K09481;K09481	-	-	-
PH1	ncbi_113802401	Dnajc8	0.638788384	0.371234619	0.783006826	1.42E-48	3.79E-44	Dnajc8	DnaJ-like protein subfamily C member 8 [Zootermopsis nevadensis]	-	-	-	-	-	-	-
PH1	ncbi_113824337	lola	0.439915667	0.235098636	0.903960817	1.84E-48	4.92E-44	lola	PREDICTED: longitudinals lacking protein, isoforms H/M/V-like isoform X3 [Hyalella azteca]	-	-	-	-	-	-	-
PH1	ncbi_113807868	ncbi_113807868	0.558525609	0.306308088	0.866639967	3.79E-48	1.01E-43	--	-	-	-	-	-	-	-	-
PH1	ncbi_113823755	ARPC3	4.521677304	3.505537816	0.367222238	6.59E-48	1.76E-43	ARPC3	Actin-related protein 2/3 complex subunit 3 [Zootermopsis nevadensis]	Cellular Processes;Cellular Processes;Human Diseases;Human Diseases;Human Diseases;Human Diseases;Organismal Systems	Cell motility;Transport and catabolism;Infectious diseases;Infectious diseases;Infectious diseases;Infectious diseases;Immune system	ko04810//Regulation of actin cytoskeleton;ko04144//Endocytosis;ko05130//Pathogenic Escherichia coli infection;ko05131//Shigellosis;ko05132//Salmonella infection;ko05100//Bacterial invasion of epithelial cells;ko04666//Fc gamma R-mediated phagocytosis	K05756;K05756;K05756;K05756;K05756;K05756;K05756	GO:0043232//intracellular non-membrane-bounded organelle	-	GO:0030833//regulation of actin filament polymerization
PH1	ncbi_113805246	Nxt1	1.516801671	1.008485459	0.588842176	8.11E-48	2.17E-43	Nxt1	NTF2-related export protein 1 [Daphnia magna]	Genetic Information Processing;Human Diseases;Genetic Information Processing;Genetic Information Processing	Translation;Infectious diseases;Translation;Translation	ko03013//RNA transport;ko05164//Influenza A;ko03015//mRNA surveillance pathway;ko03008//Ribosome biogenesis in eukaryotes	K14285;K14285;K14285;K14285	-	-	-
PH1	ncbi_113805880	Dmap1	0.485330108	0.262433765	0.887013011	1.03E-47	2.75E-43	Dmap1	PREDICTED: DNA methyltransferase 1-associated protein 1-like [Hyalella azteca]	-	-	-	-	-	-	-
PH1	ncbi_113821021	ncbi_113821021	0.568498223	0.334804872	0.763835318	1.07E-47	2.88E-43	--	-	-	-	-	-	-	-	-
PH1	ncbi_113812420	Phum_PHUM462900	0.508281616	0.266839216	0.929657342	1.97E-47	5.28E-43	Phum_PHUM462900	PREDICTED: inosine triphosphate pyrophosphatase-like [Hyalella azteca]	Metabolism;Metabolism;Metabolism	Global and overview maps;Nucleotide metabolism;Xenobiotics biodegradation and metabolism	ko01100//Metabolic pathways;ko00230//Purine metabolism;ko00983//Drug metabolism - other enzymes	K01519;K01519;K01519	GO:0044424//intracellular part	GO:0043169//cation binding;GO:0047429//nucleoside-triphosphate diphosphatase activity	GO:0006996//organelle organization;GO:0009143//nucleoside triphosphate catabolic process;GO:0009154//purine ribonucleotide catabolic process
PH1	ncbi_113809607	DCPS	1.075330808	0.719408316	0.579897808	2.83E-47	7.59E-43	DCPS	PREDICTED: m7GpppX diphosphatase [Halyomorpha halys]	Genetic Information Processing	Folding, sorting and degradation	ko03018//RNA degradation	K12584	GO:0043231//intracellular membrane-bounded organelle	GO:0016787//hydrolase activity	GO:0009987//cellular process
PH1	ncbi_113806700	CG9705	1.392852995	0.939805632	0.567608681	3.73E-47	9.99E-43	CG9705	PREDICTED: cold shock domain-containing protein CG9705-like [Hyalella azteca]	-	-	-	-	-	GO:0043169//cation binding	-
PH1	ncbi_113830429	ncbi_113830429	0.425600658	0.227811868	0.901657472	3.99E-47	1.07E-42	--	-	-	-	-	-	-	-	-
PH1	ncbi_113827003	Sap30bp	0.872908878	0.54759132	0.672731483	4.12E-47	1.10E-42	Sap30bp	PREDICTED: SAP30-binding protein-like [Hyalella azteca]	-	-	-	-	-	-	-
PH1	ncbi_113817335	FH	1.818415796	1.246137146	0.545219266	4.54E-47	1.22E-42	FH	Fumarate hydratase, mitochondrial [Daphnia magna]	Metabolism;Human Diseases;Metabolism;Human Diseases;Human Diseases;Metabolism;Metabolism	Global and overview maps;Cancers;Global and overview maps;Endocrine and metabolic diseases;Cancers;Carbohydrate metabolism;Carbohydrate metabolism	ko01100//Metabolic pathways;ko05200//Pathways in cancer;ko01200//Carbon metabolism;ko04934//Cushing syndrome;ko05211//Renal cell carcinoma;ko00020//Citrate cycle (TCA cycle);ko00620//Pyruvate metabolism	K01679;K01679;K01679;K01679;K01679;K01679;K01679	-	-	-
PH1	ncbi_113801328	U2SURP	1.190434117	0.84958135	0.486663777	7.10E-47	1.90E-42	U2SURP	PREDICTED: U2 snRNP-associated SURP motif-containing protein-like [Hyalella azteca]	Genetic Information Processing	Transcription	ko03040//Spliceosome	K12842	-	-	-
PH1	ncbi_113805265	lsm14a	1.375011169	0.977191848	0.492729604	1.03E-46	2.76E-42	lsm14a	PREDICTED: protein LSM14 homolog B-like isoform X4 [Limulus polyphemus]	-	-	-	-	-	-	-
PH1	ncbi_113803468	mtap	0.490628755	0.312142975	0.652424797	1.20E-46	3.21E-42	mtap	PREDICTED: S-methyl-5'-thioadenosine phosphorylase isoform X3 [Xenopus tropicalis]	Metabolism;Metabolism	Global and overview maps;Amino acid metabolism	ko01100//Metabolic pathways;ko00270//Cysteine and methionine metabolism	K00772;K00772	-	-	-
PH1	ncbi_113818262	Cdk12	1.921079172	1.44891272	0.406946285	1.22E-46	3.28E-42	Cdk12	PREDICTED: cyclin-dependent kinase 12 isoform X2 [Linepithema humile]	-	-	-	-	-	-	-
PH1	ncbi_113824931	Ccar1	1.052421148	0.676369415	0.637828816	1.30E-46	3.48E-42	Ccar1	PREDICTED: cell division cycle and apoptosis regulator protein 1-like isoform X1 [Solenopsis invicta]	-	-	-	-	-	-	-
PH1	ncbi_113814578	SF3B4	1.14223493	0.75800496	0.591580216	1.45E-46	3.88E-42	SF3B4	PREDICTED: splicing factor 3B subunit 4-like [Priapulus caudatus]	Genetic Information Processing	Transcription	ko03040//Spliceosome	K12831	-	GO:0097159//organic cyclic compound binding	-
PH1	ncbi_113801963	NCBP3	1.372486945	0.954544193	0.523908529	2.29E-46	6.14E-42	NCBP3	PREDICTED: nuclear cap-binding protein subunit 3-like [Neodiprion lecontei]	-	-	-	-	-	-	-
PH1	ncbi_113807219	PPIE	0.753982084	0.489080616	0.624457954	2.94E-46	7.86E-42	PPIE	PREDICTED: peptidyl-prolyl cis-trans isomerase E-like [Saccoglossus kowalevskii]	Genetic Information Processing	Transcription	ko03040//Spliceosome	K09564	-	GO:0003676//nucleic acid binding;GO:0016859//cis-trans isomerase activity	GO:0018208//peptidyl-proline modification
PH1	ncbi_113805455	Polr2f	2.066223826	1.538143873	0.42580609	4.92E-46	1.32E-41	Polr2f	PREDICTED: DNA-directed RNA polymerases I, II, and III subunit RPABC2-like [Hyalella azteca]	Metabolism;Human Diseases;Metabolism;Human Diseases;Metabolism;Genetic Information Processing;Organismal Systems	Global and overview maps;Neurodegenerative diseases;Nucleotide metabolism;Infectious diseases;Nucleotide metabolism;Transcription;Immune system	ko01100//Metabolic pathways;ko05016//Huntington disease;ko00230//Purine metabolism;ko05169//Epstein-Barr virus infection;ko00240//Pyrimidine metabolism;ko03020//RNA polymerase;ko04623//Cytosolic DNA-sensing pathway	K03014;K03014;K03014;K03014;K03014;K03014;K03014	GO:0044451//nucleoplasm part	GO:0034062//RNA polymerase activity	GO:0034645//cellular macromolecule biosynthetic process
PH1	ncbi_113825837	ncbi_113825837	1.082655377	0.648255914	0.739938719	5.81E-46	1.56E-41	--	-	-	-	-	-	-	-	-
PH1	ncbi_113817454	Gprk2	2.271072535	1.69767259	0.419815534	6.80E-46	1.82E-41	Gprk2	PREDICTED: G protein-coupled receptor kinase 2 [Dufourea novaeangliae]	Cellular Processes;Organismal Systems;Human Diseases;Environmental Information Processing	Transport and catabolism;Immune system;Substance dependence;Signal transduction	ko04144//Endocytosis;ko04062//Chemokine signaling pathway;ko05032//Morphine addiction;ko04341//Hedgehog signaling pathway - fly	K08291;K08291;K08291;K08291	-	GO:0004674//protein serine/threonine kinase activity;GO:0032550//purine ribonucleoside binding	GO:0006464//cellular protein modification process;GO:0006796//phosphate-containing compound metabolic process;GO:0045744//negative regulation of G-protein coupled receptor protein signaling pathway
PH1	ncbi_113822931	ncbi_113822931	0.705200783	0.426785652	0.7245224	8.55E-46	2.29E-41	--	-	-	-	-	-	-	-	-
PH1	ncbi_113805824	usp106	2.719382273	1.991574544	0.44936949	1.58E-45	4.24E-41	usp106	Putative RNA-binding protein Luc7-like 2 [Zootermopsis nevadensis]	-	-	-	-	-	-	-
PH1	ncbi_113819183	PHUM222080	0.439152445	0.226887711	0.952743363	1.77E-45	4.73E-41	PHUM222080	PREDICTED: U1 small nuclear ribonucleoprotein C [Diaphorina citri]	Genetic Information Processing	Transcription	ko03040//Spliceosome	K11095	-	-	-
PH1	ncbi_113822653	PPIL4	0.699250331	0.444788911	0.652688213	1.98E-45	5.30E-41	PPIL4	PREDICTED: peptidyl-prolyl cis-trans isomerase-like 4 [Trichogramma pretiosum]	-	-	-	-	-	GO:0016853//isomerase activity	GO:0044267//cellular protein metabolic process
PH1	ncbi_113812130	4CL5	2.194124258	1.62536153	0.432884578	2.09E-45	5.61E-41	4CL5	PREDICTED: 4-coumarate--CoA ligase 1 isoform X1 [Strongylocentrotus purpuratus]	Metabolism;Metabolism;Metabolism	Global and overview maps;Amino acid metabolism;Metabolism of cofactors and vitamins	ko01100//Metabolic pathways;ko00360//Phenylalanine metabolism;ko00130//Ubiquinone and other terpenoid-quinone biosynthesis	K01904;K01904;K01904	-	-	-
PH1	ncbi_113822381	Ada2b	0.425177801	0.243823336	0.802230059	7.91E-45	2.12E-40	Ada2b	PREDICTED: transcriptional adapter 2B isoform X1 [Acromyrmex echinatior]	-	-	-	-	-	-	-
PH1	ncbi_113822764	PPIL1	0.887230912	0.564311146	0.652818785	8.16E-45	2.18E-40	PPIL1	PREDICTED: peptidyl-prolyl cis-trans isomerase-like 1 [Hyalella azteca]	Genetic Information Processing	Transcription	ko03040//Spliceosome	K12733	-	-	-
PH1	ncbi_113829996	bud31	1.548272394	1.097331613	0.496659741	3.36E-44	9.00E-40	bud31	BUD31 homolog [Lepeophtheirus salmonis]	Genetic Information Processing	Transcription	ko03040//Spliceosome	K12873	GO:0043231//intracellular membrane-bounded organelle	GO:0003676//nucleic acid binding;GO:0032550//purine ribonucleoside binding;GO:0042623//ATPase activity, coupled	-
PH1	ncbi_113809910	ZNF219	0.403088195	0.225210658	0.839820428	4.32E-44	1.16E-39	ZNF219	Broad-complex protein isoform 4 [Penaeus monodon]	-	-	-	-	-	-	-
PH1	ncbi_113806775	DEGS1	0.591077604	0.353540712	0.741471199	5.44E-44	1.46E-39	DEGS1	delta-4 desaturase [Macrobrachium nipponense]	Metabolism;Environmental Information Processing;Metabolism	Global and overview maps;Signal transduction;Lipid metabolism	ko01100//Metabolic pathways;ko04071//Sphingolipid signaling pathway;ko00600//Sphingolipid metabolism	K04712;K04712;K04712	GO:0031224//intrinsic component of membrane	GO:0016491//oxidoreductase activity	GO:0006665//sphingolipid metabolic process
PH1	ncbi_113802210	ncbi_113802210	1.05430218	0.682993465	0.626344747	7.27E-44	1.95E-39	--	PREDICTED: serine/Arginine-related protein 53-like [Hyalella azteca]	-	-	-	-	-	-	-
PH1	ncbi_113821274	TM9SF3	1.384772917	0.988293122	0.486638509	7.98E-44	2.14E-39	TM9SF3	PREDICTED: transmembrane 9 superfamily member 3-like [Hyalella azteca]	-	-	-	-	-	-	-
PH1	ncbi_113810827	SLF1	0.504805832	0.293592417	0.781913871	8.80E-44	2.36E-39	SLF1	PREDICTED: SMC5-SMC6 complex localization factor protein 1-like [Octopus bimaculoides]	-	-	-	-	-	-	-
PH1	ncbi_113812879	Elmod3	0.682973185	0.401890616	0.765026046	1.17E-43	3.12E-39	Elmod3	PREDICTED: ELMO domain-containing protein 3 [Scleropages formosus]	-	-	-	-	-	-	-
PH1	ncbi_113805147	Ythdc1	1.340101138	0.955304615	0.488309146	2.26E-43	6.05E-39	Ythdc1	PREDICTED: YTH domain-containing protein 1-like [Hyalella azteca]	-	-	-	-	-	-	-
PH1	ncbi_113815009	EMG1	0.704526592	0.465917608	0.596579307	2.30E-43	6.17E-39	EMG1	PREDICTED: ribosomal RNA small subunit methyltransferase NEP1 [Nasonia vitripennis]	Genetic Information Processing	Translation	ko03008//Ribosome biogenesis in eukaryotes	K14568	-	-	-
PH1	ncbi_113822943	LYPLA1	3.966674497	3.096236002	0.357414575	3.23E-43	8.65E-39	LYPLA1	PREDICTED: acyl-protein thioesterase 1-like [Hyalella azteca]	Metabolism	Lipid metabolism	ko00564//Glycerophospholipid metabolism	K06130	-	GO:0003824//catalytic activity	-
PH1	ncbi_113809233	CHD1	0.625439262	0.378477408	0.724662603	3.44E-43	9.22E-39	CHD1	PREDICTED: chromodomain-helicase-DNA-binding protein 1-like [Hyalella azteca]	-	-	-	-	-	-	-
PH1	ncbi_113824109	ncbi_113824109	0.610608123	0.355784271	0.77924405	7.76E-43	2.08E-38	--	-	-	-	-	-	-	-	-
PH1	ncbi_113801962	NUDC	1.284162355	0.923916346	0.474993475	8.70E-43	2.33E-38	NUDC	PREDICTED: nuclear migration protein nudC [Macaca fascicularis]	-	-	-	-	-	-	-
PH1	ncbi_113813010	ncbi_113813010	1.159225839	0.834254109	0.474602865	9.86E-43	2.64E-38	--	PREDICTED: uncharacterized protein LOC108678870 [Hyalella azteca]	-	-	-	-	-	-	-
PH1	ncbi_113808561	dbf4b	0.685682048	0.434128516	0.659417561	1.61E-42	4.31E-38	dbf4b	Protein chiffon [Melipona quadrifasciata]	-	-	-	-	-	-	-
PH1	ncbi_113806389	RTRAF	1.686615749	1.181471033	0.513547073	1.69E-42	4.52E-38	RTRAF	PREDICTED: UPF0568 protein C14orf166 homolog isoform X1 [Hyalella azteca]	-	-	-	-	-	-	-
PH1	ncbi_113829898	COPS7B	0.505152645	0.308268267	0.712533018	2.37E-42	6.35E-38	COPS7B	PREDICTED: COP9 signalosome complex subunit 7a-like [Limulus polyphemus]	-	-	-	-	-	-	-
PH1	ncbi_113808989	Adk2	0.656535192	0.386172688	0.765626212	2.94E-42	7.88E-38	Adk2	Adenylate kinase 2, mitochondrial [Daphnia magna]	Metabolism;Metabolism;Metabolism	Global and overview maps;Nucleotide metabolism;Metabolism of cofactors and vitamins	ko01100//Metabolic pathways;ko00230//Purine metabolism;ko00730//Thiamine metabolism	K00939;K00939;K00939	GO:0043231//intracellular membrane-bounded organelle	GO:0016301//kinase activity;GO:0016776//phosphotransferase activity, phosphate group as acceptor;GO:0032550//purine ribonucleoside binding	GO:0009152//purine ribonucleotide biosynthetic process
PH1	ncbi_113822175	TRA2B	0.861448275	0.560509325	0.620025798	9.61E-42	2.57E-37	TRA2B	transformer-2 protein [Penaeus monodon]	Genetic Information Processing	Transcription	ko03040//Spliceosome	K12897	-	-	-
PH1	ncbi_113819612	ncbi_113819612	2.375944093	1.845982936	0.364111672	1.31E-41	3.51E-37	--	-	-	-	-	-	-	-	-
PH1	ncbi_113822407	METTL5	0.517298134	0.293607959	0.817104912	2.41E-41	6.45E-37	METTL5	PREDICTED: methyltransferase-like protein 5 [Biomphalaria glabrata]	-	-	-	-	-	GO:0016741//transferase activity, transferring one-carbon groups	GO:0008152//metabolic process
PH1	ncbi_113826785	ncbi_113826785	0.604902099	0.365813807	0.725592138	3.51E-41	9.41E-37	--	PREDICTED: gastrula zinc finger protein XlCGF8.2DB-like, partial [Nothobranchius furzeri]	-	-	-	-	-	-	-
PH1	ncbi_113808376	NIPBL	1.468725414	1.054661034	0.477785307	6.83E-41	1.83E-36	NIPBL	PREDICTED: nipped-B-like protein A [Hyalella azteca]	-	-	-	-	-	-	-
PH1	ncbi_113821376	PRCC	0.961474833	0.656878612	0.549622302	9.01E-41	2.41E-36	PRCC	PREDICTED: serine-rich adhesin for platelets-like isoform X1 [Hyalella azteca]	Human Diseases;Human Diseases	Cancers;Cancers	ko05202//Transcriptional misregulation in cancers;ko05211//Renal cell carcinoma	K13105;K13105	-	-	-
PH1	ncbi_113802761	ncbi_113802761	0.930775673	0.598235774	0.637719319	1.10E-40	2.93E-36	--	-	-	-	-	-	-	-	-
PH1	ncbi_113827578	SF3B2	0.712759904	0.46318521	0.621826992	1.17E-40	3.13E-36	SF3B2	PREDICTED: splicing factor 3B subunit 2-like [Hyalella azteca]	Genetic Information Processing	Transcription	ko03040//Spliceosome	K12829	-	-	-
PH1	ncbi_113806677	porin	1.652135692	1.095533015	0.59269922	1.40E-40	3.75E-36	porin	voltage-dependent anion-selective channel [Eriocheir sinensis]	Human Diseases;Human Diseases;Environmental Information Processing;Cellular Processes;Human Diseases;Environmental Information Processing;Cellular Processes;Organismal Systems;Organismal Systems;Cellular Processes	Neurodegenerative diseases;Infectious diseases;Signal transduction;Cell growth and death;Neurodegenerative diseases;Signal transduction;Cell growth and death;Immune system;Digestive system;Cell growth and death	ko05016//Huntington disease;ko05166//HTLV-I infection;ko04022//cGMP - PKG signaling pathway;ko04217//Necroptosis;ko05012//Parkinson disease;ko04020//Calcium signaling pathway;ko04218//Cellular senescence;ko04621//NOD-like receptor signaling pathway;ko04979//Cholesterol metabolism;ko04216//Ferroptosis	K15040;K15040;K15040;K15040;K15040;K15040;K15040;K15040;K15040;K15040	-	GO:0005244//voltage-gated ion channel activity	GO:0006820//anion transport;GO:0034765//regulation of ion transmembrane transport
PH1	ncbi_113805493	rtn1-a	2.305941126	1.702753668	0.437485939	1.51E-40	4.03E-36	rtn1-a	PREDICTED: reticulon-1-A isoform X4 [Camponotus floridanus]	-	-	-	-	-	-	-
PH1	ncbi_113822791	ctp	2.778639072	2.091578919	0.409786016	2.44E-40	6.52E-36	ctp	PREDICTED: dynein light chain 2, cytoplasmic isoform X1 [Hyalella azteca]	Organismal Systems	Excretory system	ko04962//Vasopressin-regulated water reabsorption	K10418	GO:0030286//dynein complex;GO:0043231//intracellular membrane-bounded organelle	GO:0003774//motor activity;GO:0016887//ATPase activity;GO:0045502//dynein binding;GO:0046983//protein dimerization activity	GO:0006997//nucleus organization;GO:0007281//germ cell development;GO:0007423//sensory organ development;GO:0007444//imaginal disc development;GO:0009887//organ morphogenesis;GO:0022607//cellular component assembly;GO:0035114//imaginal disc-derived appendage morphogenesis;GO:0040001//establishment of mitotic spindle localization;GO:0044248//cellular catabolic process;GO:0048102//autophagic cell d…
PH1	ncbi_113806912	Baz1a	0.872263422	0.552681615	0.658315271	5.01E-40	1.34E-35	Baz1a	PREDICTED: bromodomain adjacent to zinc finger domain protein 1A-like [Hyalella azteca]	-	-	-	-	GO:0031010//ISWI-type complex	GO:0046872//metal ion binding;GO:0090595//acetyl-CoA:L-lysine N6-acetyltransferase	GO:0006260//DNA replication;GO:0010468//regulation of gene expression;GO:0016568//chromatin modification
PH1	ncbi_113816593	RTF1	0.446421905	0.263202976	0.762232019	7.62E-40	2.04E-35	RTF1	PREDICTED: RNA polymerase-associated protein RTF1 homolog [Hyalella azteca]	-	-	-	-	-	-	-
PH1	ncbi_113802493	MED8	0.784394244	0.498128533	0.655060897	9.81E-40	2.63E-35	MED8	PREDICTED: mediator of RNA polymerase II transcription subunit 8-like [Hyalella azteca]	Human Diseases	Infectious diseases	ko05168//Herpes simplex infection	K15129	-	-	-
PH1	ncbi_113817878	ncbi_113817878	13.63443548	10.36511862	0.395518341	1.33E-39	3.57E-35	--	-	-	-	-	-	-	-	-
PH1	ncbi_113826154	MED18	0.59359266	0.358571871	0.727210933	1.38E-39	3.70E-35	MED18	PREDICTED: mediator of RNA polymerase II transcription subunit 18-like [Hyalella azteca]	-	-	-	-	-	-	-
PH1	ncbi_113804504	Stk24	0.576611678	0.334683584	0.784802265	4.56E-39	1.22E-34	Stk24	PREDICTED: serine/threonine-protein kinase 26 isoform X3 [Dufourea novaeangliae]	-	-	-	-	-	-	-
PH1	ncbi_113820262	ncbi_113820262	0.618852496	0.398007305	0.636800671	6.10E-39	1.63E-34	--	PREDICTED: protein TSSC4-like [Hyalella azteca]	-	-	-	-	-	-	-
PH1	ncbi_113819878	CERS6	0.670778095	0.418234732	0.681522703	6.65E-39	1.78E-34	CERS6	PREDICTED: ceramide synthase 6-like [Hyalella azteca]	Metabolism;Environmental Information Processing;Metabolism	Global and overview maps;Signal transduction;Lipid metabolism	ko01100//Metabolic pathways;ko04071//Sphingolipid signaling pathway;ko00600//Sphingolipid metabolism	K04710;K04710;K04710	-	-	-
PH1	ncbi_113803345	FKBP46	1.138853138	0.768757894	0.566980489	8.39E-39	2.25E-34	FKBP46	FKBP46 [Penaeus monodon]	-	-	-	-	-	GO:0016853//isomerase activity	-
PH1	ncbi_113807495	Bcap29	3.292232838	2.529068395	0.380460319	1.06E-38	2.83E-34	Bcap29	PREDICTED: B-cell receptor-associated protein 31-like [Hyalella azteca]	Human Diseases;Genetic Information Processing	Infectious diseases;Folding, sorting and degradation	ko05165//Human papillomavirus infection;ko04141//Protein processing in endoplasmic reticulum	K14009;K14009	-	-	-
PH1	ncbi_113800194	RpII15	0.916173109	0.612809809	0.580180829	1.68E-38	4.50E-34	RpII15	PREDICTED: DNA-directed RNA polymerase II subunit RPB9-like [Hyalella azteca]	Metabolism;Human Diseases;Metabolism;Human Diseases;Metabolism;Genetic Information Processing	Global and overview maps;Neurodegenerative diseases;Nucleotide metabolism;Infectious diseases;Nucleotide metabolism;Transcription	ko01100//Metabolic pathways;ko05016//Huntington disease;ko00230//Purine metabolism;ko05169//Epstein-Barr virus infection;ko00240//Pyrimidine metabolism;ko03020//RNA polymerase	K03017;K03017;K03017;K03017;K03017;K03017	GO:0044451//nucleoplasm part	GO:0003676//nucleic acid binding;GO:0034062//RNA polymerase activity;GO:0046914//transition metal ion binding	GO:0000280//nuclear division;GO:0006351//transcription, DNA-templated;GO:0030154//cell differentiation;GO:0031572//G2 DNA damage checkpoint
PH1	ncbi_113823561	csgA	0.429960245	0.272512873	0.657878892	1.84E-38	4.92E-34	csgA	C-factor [Zootermopsis nevadensis]	-	-	-	-	-	-	-
PH1	ncbi_113817338	STRAP	0.96568146	0.638164115	0.597619893	2.18E-38	5.85E-34	STRAP	PREDICTED: serine-threonine kinase receptor-associated protein-like [Hyalella azteca]	Genetic Information Processing	Translation	ko03013//RNA transport	K13137	-	-	-
PH1	ncbi_113826348	ncbi_113826348	0.745845029	0.491547001	0.601546528	3.00E-38	8.04E-34	--	Protein HEXIM [Zootermopsis nevadensis]	-	-	-	-	-	-	-
PH1	ncbi_113818122	ergic1	1.324266189	0.919593331	0.526125237	4.07E-38	1.09E-33	ergic1	PREDICTED: endoplasmic reticulum-Golgi intermediate compartment protein 1-like [Hyalella azteca]	-	-	-	-	GO:0031090//organelle membrane;GO:0043231//intracellular membrane-bounded organelle;GO:0044425//membrane part	-	GO:0006810//transport
PH1	ncbi_113803040	ncbi_113803040	0.412000084	0.240601909	0.775996545	4.62E-38	1.24E-33	--	-	-	-	-	-	-	-	-
PH1	ncbi_113830586	MED19	1.509508279	1.067925541	0.499267608	5.44E-38	1.46E-33	MED19	PREDICTED: mediator of RNA polymerase II transcription subunit 19-like isoform X2 [Hyalella azteca]	-	-	-	-	-	-	-
PH1	ncbi_113818059	PRPF4B	0.916357386	0.619747682	0.564229398	7.17E-38	1.92E-33	PRPF4B	PREDICTED: serine/threonine-protein kinase PRP4 homolog [Hyalella azteca]	-	-	-	-	-	-	-
PH1	ncbi_113808600	MYCBP	2.513485715	1.905308172	0.399665126	9.06E-38	2.42E-33	MYCBP	PREDICTED: C-Myc-binding protein-like [Octopus bimaculoides]	-	-	-	-	-	-	-
PH1	ncbi_113828542	ncbi_113828542	0.609601993	0.403540671	0.595153537	1.47E-37	3.95E-33	--	PREDICTED: LOW QUALITY PROTEIN: major facilitator superfamily domain-containing protein 6-like protein B [Branchiostoma belcheri]	-	-	-	-	-	-	-
PH1	ncbi_113816902	mRpS16	0.75931934	0.529726019	0.519460381	1.95E-37	5.22E-33	mRpS16	28S ribosomal protein S16 [Culex quinquefasciatus]	Genetic Information Processing	Translation	ko03010//Ribosome	K02959	GO:0000314//organellar small ribosomal subunit	GO:0005198//structural molecule activity	GO:0010467//gene expression
PH1	ncbi_113819954	CycC	0.617459401	0.401974245	0.619241211	2.01E-37	5.39E-33	CycC	cyclin C [Penaeus monodon]	-	-	-	-	-	-	-
PH1	ncbi_113825702	NDUFA12	1.568330211	1.132730536	0.469424649	2.79E-37	7.46E-33	NDUFA12	Probable NADH dehydrogenase 1 alpha subcomplex subunit 12 [Caligus rogercresseyi]	Metabolism;Organismal Systems;Human Diseases;Human Diseases;Human Diseases;Human Diseases;Metabolism;Organismal Systems	Global and overview maps;Environmental adaptation;Neurodegenerative diseases;Neurodegenerative diseases;Endocrine and metabolic diseases;Neurodegenerative diseases;Energy metabolism;Nervous system	ko01100//Metabolic pathways;ko04714//Thermogenesis;ko05016//Huntington disease;ko05010//Alzheimer disease;ko04932//Non-alcoholic fatty liver disease (NAFLD);ko05012//Parkinson disease;ko00190//Oxidative phosphorylation;ko04723//Retrograde endocannabinoid signaling	K11352;K11352;K11352;K11352;K11352;K11352;K11352;K11352	-	-	-
PH1	ncbi_113807220	CWC25	0.547918578	0.325822732	0.749874259	3.54E-37	9.48E-33	CWC25	PREDICTED: pre-mRNA-splicing factor CWC25 homolog isoform X1 [Bombus terrestris]	-	-	-	-	-	-	-
PH1	ncbi_113829580	mix-b	0.438408572	0.2667275	0.716909432	4.47E-37	1.20E-32	mix-b	PREDICTED: retina and anterior neural fold homeobox protein 2-like [Aplysia californica]	-	-	-	-	-	-	-
PH1	ncbi_113809656	Taf12	0.785601676	0.521560044	0.590964656	4.96E-37	1.33E-32	Taf12	PREDICTED: transcription initiation factor TFIID subunit 12-like [Hyalella azteca]	Genetic Information Processing	Transcription	ko03022//Basal transcription factors	K03126	-	-	-
PH1	ncbi_113812019	ATG12	0.873591229	0.581471613	0.58724961	7.54E-37	2.02E-32	ATG12	autophagy related protein Atg12-like protein [Danaus plexippus]	Cellular Processes;Environmental Information Processing;Organismal Systems;Cellular Processes;Organismal Systems	Transport and catabolism;Signal transduction;Immune system;Transport and catabolism;Immune system	ko04140//Autophagy - animal;ko04068//FoxO signaling pathway;ko04621//NOD-like receptor signaling pathway;ko04136//Autophagy - other eukaryotes;ko04622//RIG-I-like receptor signaling pathway	K08336;K08336;K08336;K08336;K08336	GO:0044424//intracellular part	-	GO:0044248//cellular catabolic process
PH1	ncbi_113809924	ncbi_113809924	1.971120882	1.336691235	0.560350002	7.70E-37	2.06E-32	--	-	-	-	-	-	-	-	-
PH1	ncbi_113814488	PQBP1	0.592675087	0.364138075	0.702755817	8.39E-37	2.25E-32	PQBP1	PREDICTED: polyglutamine-binding protein 1 [Polistes dominula]	Genetic Information Processing	Transcription	ko03040//Spliceosome	K12865	-	-	-
PH1	ncbi_113807347	pat-4	1.298747784	0.938561624	0.46859791	1.75E-36	4.68E-32	pat-4	PREDICTED: integrin-linked protein kinase homolog pat-4-like [Hyalella azteca]	Cellular Processes;Human Diseases;Organismal Systems;Organismal Systems;Human Diseases	Cellular community - eukaryotes;Infectious diseases;Development;Endocrine system;Cancers	ko04510//Focal adhesion;ko05100//Bacterial invasion of epithelial cells;ko04360//Axon guidance;ko03320//PPAR signaling pathway;ko05213//Endometrial cancer	K06272;K06272;K06272;K06272;K06272	-	GO:0004713//protein tyrosine kinase activity;GO:0032550//purine ribonucleoside binding	GO:0006468//protein phosphorylation;GO:0007166//cell surface receptor signaling pathway;GO:0010646//regulation of cell communication
PH1	ncbi_113827145	Wdr82	0.880920403	0.562225442	0.647862928	2.33E-36	6.23E-32	Wdr82	PREDICTED: WD repeat-containing protein 82 [Tribolium castaneum]	Genetic Information Processing	Translation	ko03015//mRNA surveillance pathway	K14962	-	-	-
PH1	ncbi_113812629	TAF9	1.047544087	0.724108571	0.53273303	2.57E-36	6.89E-32	TAF9	PREDICTED: transcription initiation factor TFIID subunit 9 [Cephus cinctus]	Human Diseases;Genetic Information Processing	Infectious diseases;Transcription	ko05168//Herpes simplex infection;ko03022//Basal transcription factors	K03133;K03133	-	-	-
PH1	ncbi_113828091	UCHL3	1.809240331	1.356767702	0.41521033	2.74E-36	7.35E-32	UCHL3	ubiquitin carboxyl-terminal esterase L3 [Penaeus monodon]	-	-	-	-	-	GO:0070011//peptidase activity, acting on L-amino acid peptides	GO:0006508//proteolysis;GO:0009987//cellular process
PH1	ncbi_113810822	mier1	0.727991047	0.504022709	0.530431973	2.96E-36	7.93E-32	mier1	PREDICTED: mucin-5AC-like [Hyalella azteca]	-	-	-	-	-	-	-
PH1	ncbi_113807060	ATRX	0.648907146	0.455366512	0.510983853	4.28E-36	1.15E-31	ATRX	PREDICTED: transcriptional regulator ATRX-like [Hyalella azteca]	-	-	-	-	-	-	-
PH1	ncbi_113806393	ncbi_113806393	0.420323083	0.266617272	0.656728446	5.21E-36	1.40E-31	--	-	-	-	-	-	-	-	-
PH1	ncbi_113804185	mRpL23	0.922502035	0.614189926	0.586867246	6.87E-36	1.84E-31	mRpL23	AAEL005150-PA [Aedes aegypti]	Genetic Information Processing	Translation	ko03010//Ribosome	K02892	GO:0000315//organellar large ribosomal subunit	GO:0005198//structural molecule activity	-
PH1	ncbi_113820489	Scaf8	0.564154523	0.354332452	0.67098677	8.36E-36	2.24E-31	Scaf8	PREDICTED: splicing factor, arginine/serine-rich 15-like isoform X1 [Hyalella azteca]	-	-	-	-	-	GO:0097159//organic cyclic compound binding	-
PH1	ncbi_113817647	tarbp2	1.160570203	0.824921352	0.49250531	1.56E-35	4.16E-31	tarbp2	TRBP1 [Litopenaeus vannamei]	-	-	-	-	-	-	-
PH1	ncbi_113829333	CDK17	0.625452914	0.427359244	0.549451949	1.57E-35	4.21E-31	CDK17	PREDICTED: cyclin-dependent kinase 17-like isoform X2 [Lingula anatina]	-	-	-	-	-	GO:0004672//protein kinase activity;GO:0032550//purine ribonucleoside binding	GO:0006464//cellular protein modification process
PH1	ncbi_113818353	rsp-7	0.606388906	0.376103453	0.689113805	1.66E-35	4.43E-31	rsp-7	PREDICTED: probable splicing factor, arginine/serine-rich 7 [Hyalella azteca]	-	-	-	-	-	-	-
PH1	ncbi_113810876	supt6h	1.228439022	0.894025961	0.458437615	1.86E-35	4.97E-31	supt6h	PREDICTED: transcription elongation factor SPT6-like [Hyalella azteca]	-	-	-	-	-	-	GO:0006139//nucleobase-containing compound metabolic process;GO:0010467//gene expression;GO:0034645//cellular macromolecule biosynthetic process
PH1	ncbi_113817801	RPN2	1.391683044	0.980562101	0.505149768	1.98E-35	5.30E-31	RPN2	PREDICTED: dolichyl-diphosphooligosaccharide--protein glycosyltransferase subunit 2-like isoform X2 [Hyalella azteca]	Metabolism;Genetic Information Processing;Metabolism	Global and overview maps;Folding, sorting and degradation;Glycan biosynthesis and metabolism	ko01100//Metabolic pathways;ko04141//Protein processing in endoplasmic reticulum;ko00510//N-Glycan biosynthesis	K12667;K12667;K12667	-	-	-
PH1	ncbi_113814021	Chmp6	0.956981185	0.642740766	0.574253582	3.09E-35	8.27E-31	Chmp6	PREDICTED: charged multivesicular body protein 6 [Ceratina calcarata]	Cellular Processes;Cellular Processes	Transport and catabolism;Cell growth and death	ko04144//Endocytosis;ko04217//Necroptosis	K12195;K12195	-	-	-
PH1	ncbi_113828209	lola	0.432436809	0.255842078	0.757235768	4.10E-35	1.10E-30	lola	Broad-complex protein isoform 4 [Penaeus monodon]	Cellular Processes;Organismal Systems	Cell growth and death;Development	ko04214//Apoptosis - fly;ko04320//Dorso-ventral axis formation	K02174;K02174	-	-	-
PH1	ncbi_113826030	nonA	0.667169058	0.423736873	0.654883706	4.41E-35	1.18E-30	nonA	PREDICTED: protein no-on-transient A-like [Hyalella azteca]	-	-	-	-	-	-	-
PH1	ncbi_113804523	ncbi_113804523	0.515205414	0.340895927	0.595816393	4.91E-35	1.32E-30	--	-	-	-	-	-	-	-	-
PH1	ncbi_113829108	let-70	1.637850243	1.170098595	0.485173351	8.07E-35	2.16E-30	let-70	Ubiquitin-conjugating enzyme/RWD-like protein [Pseudocohnilembus persalinus]	Genetic Information Processing;Environmental Information Processing;Genetic Information Processing;Human Diseases;Organismal Systems	Folding, sorting and degradation;Signal transduction;Folding, sorting and degradation;Infectious diseases;Immune system	ko04141//Protein processing in endoplasmic reticulum;ko04013//MAPK signaling pathway - fly;ko04120//Ubiquitin mediated proteolysis;ko05131//Shigellosis;ko04624//Toll and Imd signaling pathway	K06689;K06689;K06689;K06689;K06689	GO:0043234//protein complex	GO:0004842//ubiquitin-protein transferase activity;GO:0044389//ubiquitin-like protein ligase binding	GO:0001754//eye photoreceptor cell differentiation;GO:0007126//meiotic nuclear division;GO:0010608//posttranscriptional regulation of gene expression;GO:0016567//protein ubiquitination;GO:0019827//stem cell population maintenance;GO:0042551//neuron maturation;GO:0043161//proteasome-mediated ubiquitin-dependent protein catabolic process;GO:0046532//regulation of photoreceptor cell differentiation;…
PH1	ncbi_113821890	Zcchc10	0.436137425	0.25580414	0.769743182	1.18E-34	3.15E-30	Zcchc10	PREDICTED: zinc finger CCHC domain-containing protein 10-like isoform X1 [Hyalella azteca]	-	-	-	-	-	GO:0046914//transition metal ion binding;GO:0097159//organic cyclic compound binding	-
PH1	ncbi_113826345	GluProRS	0.995439615	0.6966707	0.514856913	1.30E-34	3.48E-30	GluProRS	PREDICTED: bifunctional glutamate/proline--tRNA ligase-like [Hyalella azteca]	Metabolism;Metabolism;Genetic Information Processing	Global and overview maps;Metabolism of cofactors and vitamins;Translation	ko01100//Metabolic pathways;ko00860//Porphyrin and chlorophyll metabolism;ko00970//Aminoacyl-tRNA biosynthesis	K14163;K14163;K14163	-	GO:0004812//aminoacyl-tRNA ligase activity	GO:0006418//tRNA aminoacylation for protein translation
PH1	ncbi_113825442	ncbi_113825442	0.462993109	0.294922341	0.650655605	2.25E-34	6.01E-30	--	PREDICTED: arginine and glutamate-rich protein 1-like [Hyalella azteca]	-	-	-	-	-	-	-
PH1	ncbi_113812601	Pik3cd	0.672878919	0.474113389	0.505114788	2.37E-34	6.35E-30	Pik3cd	phosphatidylinositol-4,5-bisphosphate 3-kinase catalytic subunit delta isoform [Fenneropenaeus chinensis]	Metabolism;Human Diseases;Human Diseases;Cellular Processes;Human Diseases;Environmental Information Processing;Human Diseases;Cellular Processes;Organismal Systems;Cellular Processes;Environmental Information Processing;Organismal Systems;Human Diseases;Human Diseases;Human Diseases;Human Diseases;Environmental Information Processing;Human Diseases;Human Diseases;Organismal Systems;Environmental…	Global and overview maps;Cancers;Infectious diseases;Cellular community - eukaryotes;Cancers;Signal transduction;Cancers;Cell motility;Endocrine system;Cell growth and death;Signal transduction;Immune system;Cancers;Infectious diseases;Infectious diseases;Cardiovascular diseases;Signal transduction;Cancers;Infectious diseases;Aging;Signal transduction;Cancers;Signal transduction;Infectious diseas…	ko01100//Metabolic pathways;ko05200//Pathways in cancer;ko05165//Human papillomavirus infection;ko04510//Focal adhesion;ko05205//Proteoglycans in cancer;ko04151//PI3K-Akt signaling pathway;ko05225//Hepatocellular carcinoma;ko04810//Regulation of actin cytoskeleton;ko04919//Thyroid hormone signaling pathway;ko04210//Apoptosis;ko04015//Rap1 signaling pathway;ko04611//Platelet activation;ko05231//Ch…	K00922;K00922;K00922;K00922;K00922;K00922;K00922;K00922;K00922;K00922;K00922;K00922;K00922;K00922;K00922;K00922;K00922;K00922;K00922;K00922;K00922;K00922;K00922;K00922;K00922;K00922;K00922;K00922;K00922;K00922;K00922;K00922;K00922;K00922;K00922;K00922;K00922;K00922;K00922;K00922;K00922;K00922;K00922;K00922;K00922;K00922;K00922;K00922;K00922;K00922;K00922;K00922;K00922;K00922;K00922;K00922;K00922;…	-	GO:0016772//transferase activity, transferring phosphorus-containing groups	GO:0009987//cellular process
PH1	ncbi_113823334	ncbi_113823334	0.673122414	0.428386579	0.651955616	2.93E-34	7.86E-30	--	PREDICTED: protein Star-like [Cimex lectularius]	-	-	-	-	-	-	-
PH1	ncbi_113807513	Taf7	0.706625819	0.459550835	0.620722004	3.30E-34	8.83E-30	Taf7	PREDICTED: transcription initiation factor TFIID subunit 7 [Athalia rosae]	Genetic Information Processing	Transcription	ko03022//Basal transcription factors	K03132	-	-	-
PH1	ncbi_113801639	Usp19	0.478482013	0.294529409	0.700052997	3.37E-34	9.02E-30	Usp19	PREDICTED: ubiquitin carboxyl-terminal hydrolase 19-like [Hyalella azteca]	-	-	-	-	-	-	-
PH1	ncbi_113808040	ncbi_113808040	0.445580459	0.291424382	0.61256438	8.68E-34	2.33E-29	--	PREDICTED: uncharacterized protein LOC108683002 [Hyalella azteca]	-	-	-	-	-	-	-
PH1	ncbi_113810471	ncbi_113810471	0.775313114	0.508477881	0.60859405	1.23E-33	3.29E-29	--	-	-	-	-	-	-	-	-
PH1	ncbi_113830344	ncbi_113830344	1.322417467	0.950600169	0.476267122	1.26E-33	3.39E-29	--	-	-	-	-	-	-	-	-
PH1	ncbi_113809657	Rbmx2	0.624887251	0.438854465	0.509853321	2.62E-33	7.01E-29	Rbmx2	RNA recognition motif-containing protein [Sarcoptes scabiei]	-	-	-	-	-	-	-
PH1	ncbi_113805226	ncbi_113805226	0.58730625	0.385941149	0.605732118	3.24E-33	8.69E-29	--	PREDICTED: NF-kappa-B-repressing factor [Orussus abietinus]	-	-	-	-	-	-	-
PH1	ncbi_113824599	Ascc1	0.547992202	0.336379073	0.704067408	4.26E-33	1.14E-28	Ascc1	PREDICTED: activating signal cointegrator 1 complex subunit 1-like [Limulus polyphemus]	-	-	-	-	-	-	-
PH1	ncbi_113802448	zcchc8	0.641156994	0.412751959	0.635402598	4.56E-33	1.22E-28	zcchc8	PREDICTED: zinc finger CCHC domain-containing protein 8 homolog [Hyalella azteca]	-	-	-	-	-	-	-
PH1	ncbi_113814239	ncbi_113814239	0.602436604	0.401327492	0.586029442	6.06E-33	1.62E-28	--	PREDICTED: uncharacterized protein LOC108673323 [Hyalella azteca]	-	-	-	-	-	-	-
PH1	ncbi_113800039	Ubxn6	0.439754282	0.267702409	0.716067502	6.39E-33	1.71E-28	Ubxn6	PREDICTED: UBX domain-containing protein 6 [Athalia rosae]	Genetic Information Processing	Folding, sorting and degradation	ko04141//Protein processing in endoplasmic reticulum	K14011	-	-	-
PH1	ncbi_113820296	Ptbp1	0.855363751	0.642555591	0.412716796	8.41E-33	2.25E-28	Ptbp1	PREDICTED: polypyrimidine tract-binding protein 2 isoform X6 [Orussus abietinus]	-	-	-	-	-	-	-
PH1	ncbi_113822664	AP2M1	0.647309834	0.421606958	0.618557742	2.24E-32	5.99E-28	AP2M1	clathrin-associated adaptor protein complexes mu subunit [Cherax quadricarinatus]	Human Diseases;Cellular Processes;Organismal Systems;Organismal Systems	Neurodegenerative diseases;Transport and catabolism;Nervous system;Excretory system	ko05016//Huntington disease;ko04144//Endocytosis;ko04721//Synaptic vesicle cycle;ko04961//Endocrine and other factor-regulated calcium reabsorption	K11826;K11826;K11826;K11826	GO:0016023//cytoplasmic, membrane-bounded vesicle;GO:0030131//clathrin adaptor complex	GO:0022892//substrate-specific transporter activity	GO:0001505//regulation of neurotransmitter levels;GO:0003006//developmental process involved in reproduction;GO:0006901//vesicle coating;GO:0009888//tissue development;GO:0015031//protein transport;GO:0044765//single-organism transport
PH1	ncbi_113820861	Tsnax	0.606180272	0.423355585	0.517876979	5.28E-32	1.41E-27	Tsnax	PREDICTED: translin-associated protein X-like [Branchiostoma belcheri]	-	-	-	-	GO:0044424//intracellular part	GO:0031685//adenosine receptor binding;GO:0043566//structure-specific DNA binding	-
PH1	ncbi_113807625	Creb1	0.453254364	0.278651657	0.701858175	6.98E-32	1.87E-27	Creb1	cAMP-responsive element binding protein, partial [Procambarus clarkii]	-	-	-	-	-	-	-
PH1	ncbi_113809143	ncbi_113809143	1.489603917	1.132165857	0.39584345	8.14E-32	2.18E-27	--	Zn-finger in Ran binding protein and others domain containing protein [Acanthamoeba castellanii str. Neff] [Acanthamoeba castellanii]	-	-	-	-	-	-	-
PH1	ncbi_113805977	DNAJA1	1.274559107	0.974518204	0.387237239	1.26E-31	3.37E-27	DNAJA1	heat shock protein 40 [Marsupenaeus japonicus]	Genetic Information Processing	Folding, sorting and degradation	ko04141//Protein processing in endoplasmic reticulum	K09502	GO:0031988//membrane-bounded vesicle;GO:0044444//cytoplasmic part	GO:0031072//heat shock protein binding;GO:0032550//purine ribonucleoside binding;GO:0043169//cation binding;GO:0044389//ubiquitin-like protein ligase binding;GO:0070325//lipoprotein particle receptor binding	GO:0006950//response to stress;GO:0015031//protein transport;GO:0030518//intracellular steroid hormone receptor signaling pathway;GO:0031396//regulation of protein ubiquitination;GO:0033365//protein localization to organelle;GO:0042981//regulation of apoptotic process;GO:0043407//negative regulation of MAP kinase activity;GO:0048232//male gamete generation;GO:0048870//cell motility
PH1	ncbi_113811521	prkrip1	0.971670078	0.682340475	0.509974746	1.32E-31	3.54E-27	prkrip1	PREDICTED: PRKR-interacting protein 1 homolog [Hyalella azteca]	-	-	-	-	-	-	-
PH1	ncbi_113827953	TfIIFalpha	1.830820526	1.373513991	0.414618766	1.38E-31	3.70E-27	TfIIFalpha	General transcription factor IIF subunit 1 [Lucilia cuprina]	Genetic Information Processing	Transcription	ko03022//Basal transcription factors	K03138	-	-	-
PH1	ncbi_113817497	Cir1	1.100112364	0.809036304	0.443374539	2.08E-31	5.58E-27	Cir1	PREDICTED: corepressor interacting with RBPJ 1 [Microplitis demolitor]	Environmental Information Processing	Signal transduction	ko04330//Notch signaling pathway	K06066	-	-	-
PH1	ncbi_113800265	Mta1	0.505596816	0.344935303	0.551661588	3.53E-31	9.46E-27	Mta1	PREDICTED: metastasis-associated protein MTA3 isoform X2 [Tribolium castaneum]	-	-	-	-	-	-	-
PH1	ncbi_113828411	ncbi_113828411	0.670234513	0.423297389	0.66299439	4.56E-31	1.22E-26	--	-	-	-	-	-	-	-	-
PH1	ncbi_113821234	ncbi_113821234	1.088998505	0.788876508	0.465130593	6.68E-31	1.79E-26	--	RhoA activator C11orf59-like protein [Zootermopsis nevadensis]	Environmental Information Processing	Signal transduction	ko04150//mTOR signaling pathway	K20397	-	-	-
PH1	ncbi_113824159	Tmbim4	0.799322667	0.539780817	0.566404296	9.16E-31	2.45E-26	Tmbim4	PREDICTED: protein lifeguard 4-like [Hyalella azteca]	-	-	-	-	-	-	-
PH1	ncbi_113806869	Cfdp1	0.558591922	0.385091342	0.536594022	1.73E-30	4.63E-26	Cfdp1	PREDICTED: craniofacial development protein 1-like isoform X2 [Hyalella azteca]	-	-	-	-	-	-	-
PH1	ncbi_113812500	MRPS28	0.838478605	0.58833392	0.511138757	2.07E-30	5.55E-26	MRPS28	AAEL003730-PA [Aedes aegypti]	-	-	-	-	-	-	-
PH1	ncbi_113814166	TAF10	0.792931115	0.556902261	0.509771389	4.40E-30	1.18E-25	TAF10	PREDICTED: transcription initiation factor TFIID subunit 10-like [Branchiostoma belcheri]	Human Diseases;Genetic Information Processing	Infectious diseases;Transcription	ko05168//Herpes simplex infection;ko03022//Basal transcription factors	K03134;K03134	-	-	GO:0032774//RNA biosynthetic process
PH1	ncbi_113808455	Sart1	0.792831052	0.572951114	0.468601419	4.42E-30	1.18E-25	Sart1	PREDICTED: U4/U6.U5 tri-snRNP-associated protein 1-like [Hyalella azteca]	Genetic Information Processing	Transcription	ko03040//Spliceosome	K11984	-	-	-
PH1	ncbi_113817302	nosip	0.695787955	0.479159236	0.538142527	4.94E-30	1.32E-25	nosip	nitric oxide synthase inihibitory protein [Gecarcinus lateralis]	-	-	-	-	-	-	-
PH1	ncbi_113820868	GEMIN8	0.486399956	0.331775753	0.551934644	5.46E-30	1.46E-25	GEMIN8	PREDICTED: gem-associated protein 8-like [Hyalella azteca]	Genetic Information Processing	Translation	ko03013//RNA transport	K13136	-	-	-
PH1	ncbi_113814392	TfIIFbeta	0.72447614	0.486864347	0.57341832	5.58E-30	1.49E-25	TfIIFbeta	PREDICTED: general transcription factor IIF subunit 2 [Nicrophorus vespilloides]	Genetic Information Processing	Transcription	ko03022//Basal transcription factors	K03139	-	-	-
PH1	ncbi_113825790	dauE	0.896698142	0.621251773	0.529444344	6.72E-30	1.80E-25	dauE	3-oxoacyl-[acyl-carrier-protein] reductase [Zootermopsis nevadensis]	-	-	-	-	-	GO:0003824//catalytic activity	GO:0044710//single-organism metabolic process
PH1	ncbi_113822803	ABHD16A	0.565297887	0.376512934	0.586311879	1.07E-29	2.86E-25	ABHD16A	PREDICTED: protein ABHD16A-like [Parasteatoda tepidariorum]	-	-	-	-	-	-	-
PH1	ncbi_113812187	ncbi_113812187	1.178477537	0.894068331	0.398467257	1.11E-29	2.96E-25	--	-	-	-	-	-	-	-	-
PH1	ncbi_113818781	Srsf7	0.423311245	0.250597505	0.756346763	1.17E-29	3.12E-25	Srsf7	PREDICTED: serine/arginine-rich splicing factor 3-like [Hyalella azteca]	-	-	-	-	-	GO:0097159//organic cyclic compound binding	-
PH1	ncbi_113829534	MAP2K1	1.213882963	0.867467714	0.484747362	1.54E-29	4.12E-25	MAP2K1	mitogen-activated protein kinase kinase [Fenneropenaeus chinensis]	Human Diseases;Human Diseases;Cellular Processes;Human Diseases;Environmental Information Processing;Human Diseases;Cellular Processes;Organismal Systems;Cellular Processes;Environmental Information Processing;Human Diseases;Environmental Information Processing;Human Diseases;Organismal Systems;Environmental Information Processing;Human Diseases;Environmental Information Processing;Human Diseases…	Cancers;Infectious diseases;Cellular community - eukaryotes;Cancers;Signal transduction;Cancers;Cell motility;Endocrine system;Cell growth and death;Signal transduction;Cancers;Signal transduction;Infectious diseases;Endocrine system;Signal transduction;Cancers;Signal transduction;Substance dependence;Signal transduction;Signal transduction;Signal transduction;Transport and catabolism;Endocrine a…	ko05200//Pathways in cancer;ko05165//Human papillomavirus infection;ko04510//Focal adhesion;ko05205//Proteoglycans in cancer;ko04151//PI3K-Akt signaling pathway;ko05225//Hepatocellular carcinoma;ko04810//Regulation of actin cytoskeleton;ko04919//Thyroid hormone signaling pathway;ko04210//Apoptosis;ko04015//Rap1 signaling pathway;ko05231//Choline metabolism in cancer;ko04013//MAPK signaling pathwa…	K04368;K04368;K04368;K04368;K04368;K04368;K04368;K04368;K04368;K04368;K04368;K04368;K04368;K04368;K04368;K04368;K04368;K04368;K04368;K04368;K04368;K04368;K04368;K04368;K04368;K04368;K04368;K04368;K04368;K04368;K04368;K04368;K04368;K04368;K04368;K04368;K04368;K04368;K04368;K04368;K04368;K04368;K04368;K04368;K04368;K04368;K04368;K04368;K04368;K04368;K04368;K04368;K04368;K04368;K04368;K04368;K04368;…	-	GO:0004672//protein kinase activity;GO:0032550//purine ribonucleoside binding	GO:0006464//cellular protein modification process;GO:0006796//phosphate-containing compound metabolic process
PH1	ncbi_113828240	uba3	0.819784223	0.583209345	0.491230387	2.17E-29	5.81E-25	uba3	PREDICTED: NEDD8-activating enzyme E1 catalytic subunit isoform X3 [Scleropages formosus]	Genetic Information Processing	Folding, sorting and degradation	ko04120//Ubiquitin mediated proteolysis	K10686	-	-	-
PH1	ncbi_113811895	MED10	1.29598099	0.95429877	0.441531638	2.58E-29	6.91E-25	MED10	PREDICTED: mediator of RNA polymerase II transcription subunit 10-like [Hyalella azteca]	-	-	-	-	GO:0043234//protein complex	-	GO:0006355//regulation of transcription, DNA-templated
PH1	ncbi_113819738	Otub1	0.628814258	0.420299018	0.581217843	2.96E-29	7.93E-25	Otub1	OTU domain ubiquitin aldehyde binding protein [Scylla paramamosain]	-	-	-	-	-	-	-
PH1	ncbi_113811573	ncm	0.475729108	0.313524175	0.601563611	4.62E-29	1.24E-24	ncm	PREDICTED: pre-mRNA-splicing factor CWC22 homolog isoform X1 [Hyalella azteca]	-	-	-	-	-	-	-
PH1	ncbi_113825909	mlst8	0.573103993	0.387160866	0.565863813	5.43E-29	1.45E-24	mlst8	PREDICTED: target of rapamycin complex subunit lst8-like [Lingula anatina]	Organismal Systems;Environmental Information Processing;Environmental Information Processing;Cellular Processes;Cellular Processes	Environmental adaptation;Signal transduction;Signal transduction;Transport and catabolism;Transport and catabolism	ko04714//Thermogenesis;ko04151//PI3K-Akt signaling pathway;ko04150//mTOR signaling pathway;ko04140//Autophagy - animal;ko04136//Autophagy - other eukaryotes	K08266;K08266;K08266;K08266;K08266	-	-	GO:0001934//positive regulation of protein phosphorylation;GO:0032006//regulation of TOR signaling;GO:0032970//regulation of actin filament-based process
PH1	ncbi_113809198	Gtf2h4	0.466879987	0.294092205	0.666783203	6.06E-29	1.62E-24	Gtf2h4	general transcription factor IIH subunit 4 [Penaeus monodon]	Human Diseases;Genetic Information Processing;Genetic Information Processing	Cancers;Replication and repair;Transcription	ko05203//Viral carcinogenesis;ko03420//Nucleotide excision repair;ko03022//Basal transcription factors	K03144;K03144;K03144	-	-	-
PH1	ncbi_113824746	lolal	0.450729784	0.30573255	0.559992629	6.48E-29	1.74E-24	lolal	PREDICTED: zinc finger and BTB domain-containing protein 17-like isoform X13 [Hyalella azteca]	-	-	-	-	-	-	-
PH1	ncbi_113813818	for	1.569329259	1.180856978	0.410313833	6.56E-29	1.76E-24	for	PREDICTED: cGMP-dependent protein kinase, isozyme 2 forms cD5/T2-like [Hyalella azteca]	Organismal Systems;Organismal Systems;Environmental Information Processing;Organismal Systems;Cellular Processes;Organismal Systems;Organismal Systems;Organismal Systems;Organismal Systems;Organismal Systems	Environmental adaptation;Immune system;Signal transduction;Circulatory system;Cellular community - eukaryotes;Environmental adaptation;Digestive system;Nervous system;Endocrine system;Sensory system	ko04714//Thermogenesis;ko04611//Platelet activation;ko04022//cGMP - PKG signaling pathway;ko04270//Vascular smooth muscle contraction;ko04540//Gap junction;ko04713//Circadian entrainment;ko04970//Salivary secretion;ko04730//Long-term depression;ko04923//Regulation of lipolysis in adipocyte;ko04740//Olfactory transduction	K07376;K07376;K07376;K07376;K07376;K07376;K07376;K07376;K07376;K07376	-	-	-
PH1	ncbi_113817009	ncbi_113817009	0.537591246	0.364433448	0.560854268	8.99E-29	2.41E-24	--	PREDICTED: aprataxin and PNK-like factor [Hyalella azteca]	-	-	-	-	GO:0043231//intracellular membrane-bounded organelle;GO:0044427//chromosomal part	GO:0004520//endodeoxyribonuclease activity;GO:0004527//exonuclease activity;GO:0036094//small molecule binding	GO:0006281//DNA repair;GO:0006308//DNA catabolic process;GO:0051054//positive regulation of DNA metabolic process
PH1	ncbi_113808397	ncbi_113808397	1.069723241	0.819412261	0.384576205	1.16E-28	3.11E-24	--	PREDICTED: polyadenylate-binding protein-interacting protein 1-like isoform X2 [Parasteatoda tepidariorum]	Genetic Information Processing	Translation	ko03013//RNA transport	K14322	-	-	-
PH1	ncbi_113805258	FGFR1OP	0.606583414	0.419187017	0.533112017	1.55E-28	4.14E-24	FGFR1OP	PREDICTED: FGFR1 oncogene partner-like [Acropora digitifera]	-	-	-	-	-	-	-
PH1	ncbi_113825876	NAA16	0.437376798	0.305116488	0.519516546	1.68E-28	4.50E-24	NAA16	PREDICTED: N-alpha-acetyltransferase 15, NatA auxiliary subunit-like [Hyalella azteca]	-	-	-	-	-	-	-
PH1	ncbi_113804850	ncbi_113804850	0.764110139	0.527431998	0.534795505	2.38E-28	6.37E-24	--	-	-	-	-	-	-	-	-
PH1	ncbi_113807401	YIPF5	0.935122552	0.667814452	0.485708134	3.17E-28	8.48E-24	YIPF5	Protein YIPF [Daphnia magna]	-	-	-	-	-	-	-
PH1	ncbi_113817362	cops6	0.744407547	0.511361504	0.541749126	5.26E-28	1.41E-23	cops6	COP9 constitutive photomorphogenic-like protein subunit 6 [Penaeus monodon]	-	-	-	-	GO:0031988//membrane-bounded vesicle;GO:0043234//protein complex;GO:0044424//intracellular part	-	GO:0000338//protein deneddylation
PH1	ncbi_113824618	SMU1	0.535906161	0.339877151	0.656967026	9.68E-28	2.59E-23	SMU1	SMU1 [Macrobrachium rosenbergii]	-	-	-	-	GO:0044424//intracellular part	-	-
PH1	ncbi_113805598	TMEM68	0.443139271	0.276107107	0.682532161	1.18E-27	3.17E-23	TMEM68	AAEL012417-PA [Aedes aegypti]	-	-	-	-	-	-	-
PH1	ncbi_113808115	ncbi_113808115	0.84559573	0.601228281	0.49205522	1.43E-27	3.83E-23	--	AAEL005369-PB [Aedes aegypti]	-	-	-	-	-	-	-
PH1	ncbi_113816129	tbc1d7	0.449785496	0.28550571	0.65571754	1.67E-27	4.47E-23	tbc1d7	PREDICTED: TBC1 domain family member 7 [Anoplophora glabripennis]	Environmental Information Processing	Signal transduction	ko04150//mTOR signaling pathway	K20396	-	-	-
PH1	ncbi_113813705	UBE2R2	1.443126218	1.11427506	0.373092077	1.68E-27	4.50E-23	UBE2R2	ubiquitin-conjugating enyzme E2r [Marsupenaeus japonicus]	Genetic Information Processing;Human Diseases	Folding, sorting and degradation;Infectious diseases	ko04120//Ubiquitin mediated proteolysis;ko05168//Herpes simplex infection	K02207;K02207	-	GO:0003824//catalytic activity	-
PH1	ncbi_113828572	GA10892	0.434633046	0.26355931	0.721670216	2.90E-27	7.77E-23	GA10892	PREDICTED: mannose-1-phosphate guanyltransferase beta-like [Plutella xylostella]	Metabolism;Metabolism;Metabolism	Global and overview maps;Carbohydrate metabolism;Carbohydrate metabolism	ko01100//Metabolic pathways;ko00520//Amino sugar and nucleotide sugar metabolism;ko00051//Fructose and mannose metabolism	K00966;K00966;K00966	-	GO:0016772//transferase activity, transferring phosphorus-containing groups	-
PH1	ncbi_113807167	Ssrp	0.735711062	0.537833863	0.451978689	4.49E-27	1.20E-22	Ssrp	PREDICTED: FACT complex subunit Ssrp1-like [Hyalella azteca]	-	-	-	-	-	-	-
PH1	ncbi_113816595	ncbi_113816595	0.443345906	0.299307533	0.566804164	5.19E-27	1.39E-22	--	PREDICTED: zinc finger protein 525-like [Hyalella azteca]	-	-	-	-	-	GO:0005488//binding	-
PH1	ncbi_113801053	PRKCSH	0.575104919	0.399805818	0.524525711	6.12E-27	1.64E-22	PRKCSH	Glucosidase 2 subunit beta [Daphnia magna]	Genetic Information Processing	Folding, sorting and degradation	ko04141//Protein processing in endoplasmic reticulum	K08288	-	-	-
PH1	ncbi_113804004	Rngtt	0.456123156	0.304355172	0.583667533	6.52E-27	1.75E-22	Rngtt	PREDICTED: mRNA-capping enzyme-like [Hyalella azteca]	Genetic Information Processing	Translation	ko03015//mRNA surveillance pathway	K13917	-	-	-
PH1	ncbi_113800995	Mrpl40	0.413487738	0.288758428	0.517981492	1.07E-26	2.85E-22	Mrpl40	PREDICTED: 39S ribosomal protein L40, mitochondrial isoform X1 [Agrilus planipennis]	-	-	-	-	-	-	-
PH1	ncbi_113825438	EIF4G2	0.74563772	0.563863136	0.403129819	1.21E-26	3.24E-22	EIF4G2	Eukaryotic translation initiation factor 4 gamma [Daphnia magna]	Genetic Information Processing;Human Diseases	Translation;Cardiovascular diseases	ko03013//RNA transport;ko05416//Viral myocarditis	K03260;K03260	-	-	-
PH1	ncbi_113815876	ncbi_113815876	0.519635592	0.349559645	0.57196161	1.26E-26	3.37E-22	--	PREDICTED: microtubule-associated protein futsch-like [Fopius arisanus]	-	-	-	-	-	-	-
PH1	ncbi_113830341	ncbi_113830341	0.493007907	0.31822277	0.631573717	3.30E-26	8.84E-22	--	PREDICTED: serine-aspartate repeat-containing protein F-like [Lingula anatina]	-	-	-	-	-	-	-
PH1	ncbi_113821530	Sirup	0.481943121	0.320566927	0.588237302	3.44E-26	9.20E-22	Sirup	PREDICTED: succinate dehydrogenase assembly factor 4, mitochondrial-like [Bemisia tabaci]	-	-	-	-	-	-	-
PH1	ncbi_113816843	CACTIN	0.467167824	0.314851011	0.569271614	4.06E-26	1.09E-21	CACTIN	cactin [Litopenaeus vannamei]	-	-	-	-	-	-	-
PH1	ncbi_113803548	ken	0.75120828	0.549225892	0.451813324	4.33E-26	1.16E-21	ken	PREDICTED: transcription factor che-1-like [Bemisia tabaci]	Environmental Information Processing	Signal transduction	ko04013//MAPK signaling pathway - fly	K20210	-	-	-
PH1	ncbi_113818357	csn1	0.674067927	0.475523525	0.503377265	6.39E-26	1.71E-21	csn1	PREDICTED: COP9 signalosome complex subunit 1-like [Crassostrea gigas]	-	-	-	-	-	-	-
PH1	ncbi_113830144	shv	1.01076881	0.747380211	0.435538781	8.97E-26	2.40E-21	shv	PREDICTED: dnaJ homolog subfamily B member 11 [Stomoxys calcitrans]	Genetic Information Processing	Folding, sorting and degradation	ko04141//Protein processing in endoplasmic reticulum	K09517	-	GO:0005515//protein binding	-
PH1	ncbi_113808531	DHX34	0.6306898	0.410561276	0.619333041	2.53E-25	6.77E-21	DHX34	PREDICTED: probable ATP-dependent RNA helicase DHX34 [Hyalella azteca]	-	-	-	-	-	-	-
PH1	ncbi_113828834	ncbi_113828834	0.950883079	0.728943455	0.383461051	3.57E-25	9.55E-21	--	-	-	-	-	-	-	-	-
PH1	ncbi_113823748	CG7483	1.143200946	0.872384522	0.390042936	3.74E-25	1.00E-20	CG7483	PREDICTED: eukaryotic initiation factor 4A-III [Hyalella azteca]	Genetic Information Processing;Genetic Information Processing;Genetic Information Processing	Translation;Transcription;Translation	ko03013//RNA transport;ko03040//Spliceosome;ko03015//mRNA surveillance pathway	K13025;K13025;K13025	-	-	-
PH1	ncbi_113816372	dda1	1.24244014	0.925729536	0.424513688	5.44E-25	1.46E-20	dda1	PREDICTED: DET1- and DDB1-associated protein 1 [Athalia rosae]	-	-	-	-	-	-	-
PH1	ncbi_113829391	dctn2	1.167503244	0.894987822	0.383486602	6.85E-25	1.84E-20	dctn2	PREDICTED: dynactin subunit 2-like [Hyalella azteca]	Human Diseases;Organismal Systems	Neurodegenerative diseases;Excretory system	ko05016//Huntington disease;ko04962//Vasopressin-regulated water reabsorption	K10424;K10424	-	-	-
PH1	ncbi_113812036	Rnmt	0.615676343	0.432365698	0.509920066	8.55E-25	2.29E-20	Rnmt	PREDICTED: mRNA cap guanine-N7 methyltransferase-like [Hyalella azteca]	Genetic Information Processing	Translation	ko03015//mRNA surveillance pathway	K00565	-	-	-
PH1	ncbi_113827890	BAZ1A	0.869021057	0.611452903	0.507149756	1.08E-24	2.88E-20	BAZ1A	Bromodomain adjacent to zinc finger domain protein 1A [Orchesella cincta]	-	-	-	-	-	-	-
PH1	ncbi_113810210	Cops4	0.570141784	0.416596877	0.452668712	1.17E-24	3.13E-20	Cops4	PREDICTED: COP9 signalosome complex subunit 4-like [Hyalella azteca]	-	-	-	-	-	-	-
PH1	ncbi_113812502	KPNA2	2.84819379	1.702316956	0.742547631	1.28E-24	3.44E-20	KPNA2	PREDICTED: importin subunit alpha-1-like isoform X2 [Hyalella azteca]	Human Diseases	Infectious diseases	ko05164//Influenza A	K15043	-	GO:0005488//binding	GO:0006606//protein import into nucleus
PH1	ncbi_113808974	ncbi_113808974	0.825856265	0.553755728	0.576640995	1.38E-24	3.69E-20	--	PREDICTED: UPF0184 protein AAEL002161-like [Nicrophorus vespilloides]	-	-	-	-	-	-	-
PH1	ncbi_113817779	PPP1R2	1.057305564	0.797992542	0.405945211	2.94E-24	7.89E-20	PPP1R2	Protein phosphatase inhibitor 2 [Zootermopsis nevadensis]	-	-	-	-	-	-	-
PH1	ncbi_113825058	Mrps18a	0.498919951	0.357397179	0.481280116	3.49E-24	9.35E-20	Mrps18a	PREDICTED: 28S ribosomal protein S18a, mitochondrial [Drosophila kikkawai]	Genetic Information Processing	Translation	ko03010//Ribosome	K02963	GO:0005622//intracellular	-	-
PH1	ncbi_113812815	thoc6	0.544455998	0.367419951	0.567385492	4.18E-24	1.12E-19	thoc6	PREDICTED: THO complex subunit 6 homolog [Hyalella azteca]	Genetic Information Processing	Translation	ko03013//RNA transport	K13175	-	-	-
PH1	ncbi_113822189	Pym	0.695896323	0.491986737	0.500252961	4.51E-24	1.21E-19	Pym	PREDICTED: partner of Y14 and mago-like [Parasteatoda tepidariorum]	Genetic Information Processing;Genetic Information Processing	Translation;Translation	ko03013//RNA transport;ko03015//mRNA surveillance pathway	K14294;K14294	-	-	-
PH1	ncbi_113803512	RAB35	1.342190204	1.043101305	0.363709855	4.95E-24	1.33E-19	RAB35	PREDICTED: ras-related protein Rab-35 [Agrilus planipennis]	Cellular Processes	Transport and catabolism	ko04144//Endocytosis	K07876	-	GO:0004620//phospholipase activity;GO:0016790//thiolester hydrolase activity;GO:0032550//purine ribonucleoside binding	GO:0008104//protein localization;GO:0035556//intracellular signal transduction
PH1	ncbi_113812465	aph-1	0.824467947	0.573506407	0.523653803	5.06E-24	1.35E-19	aph-1	anterior pharynx defective 1 [Litopenaeus vannamei]	Human Diseases;Environmental Information Processing	Neurodegenerative diseases;Signal transduction	ko05010//Alzheimer disease;ko04330//Notch signaling pathway	K06172;K06172	-	-	GO:0008152//metabolic process
PH1	ncbi_113823538	PCYT2	1.571756822	1.227314066	0.356873547	5.21E-24	1.39E-19	PCYT2	PREDICTED: ethanolamine-phosphate cytidylyltransferase-like [Hyalella azteca]	Metabolism;Metabolism;Metabolism	Global and overview maps;Lipid metabolism;Metabolism of other amino acids	ko01100//Metabolic pathways;ko00564//Glycerophospholipid metabolism;ko00440//Phosphonate and phosphinate metabolism	K00967;K00967;K00967	-	-	GO:0008152//metabolic process
PH1	ncbi_113820661	Sxl	0.510621213	0.361393474	0.49868302	6.50E-24	1.74E-19	Sxl	Sex-lethal [Eriocheir sinensis]	-	-	-	-	-	-	-
PH1	ncbi_113814003	ncbi_113814003	0.559467442	0.416088164	0.427164926	8.10E-24	2.17E-19	--	PREDICTED: histone-lysine N-methyltransferase 2D-like [Hyalella azteca]	-	-	-	-	-	-	-
PH1	ncbi_113816903	CARNMT1	0.434349927	0.294987465	0.558204144	9.83E-24	2.63E-19	CARNMT1	PREDICTED: carnosine N-methyltransferase isoform X2 [Nasonia vitripennis]	Metabolism	Amino acid metabolism	ko00340//Histidine metabolism	K19787	-	-	-
PH1	ncbi_113809742	gatad1	0.443121885	0.306816486	0.530327577	1.39E-23	3.72E-19	gatad1	PREDICTED: GATA zinc finger domain-containing protein 1-like [Limulus polyphemus]	-	-	-	-	-	-	-
PH1	ncbi_113820074	Txndc12	0.540325698	0.384156811	0.492133963	1.62E-23	4.32E-19	Txndc12	PREDICTED: thioredoxin domain-containing protein 12 [Strongylocentrotus purpuratus]	Metabolism	Metabolism of other amino acids	ko00480//Glutathione metabolism	K05360	-	-	-
PH1	ncbi_113829237	heix	0.433412214	0.286777165	0.59580966	2.10E-23	5.62E-19	heix	PREDICTED: ubiA prenyltransferase domain-containing protein 1 homolog [Hyalella azteca]	-	-	-	-	-	-	-
PH1	ncbi_113810712	Actn	0.568026843	0.409482126	0.47215863	3.46E-23	9.25E-19	Actn	PREDICTED: alpha-actinin, sarcomeric-like isoform X2 [Hyalella azteca]	Cellular Processes;Cellular Processes;Cellular Processes;Cellular Processes;Human Diseases;Organismal Systems;Human Diseases;Human Diseases	Cellular community - eukaryotes;Cell motility;Cellular community - eukaryotes;Cellular community - eukaryotes;Cancers;Immune system;Infectious diseases;Immune diseases	ko04510//Focal adhesion;ko04810//Regulation of actin cytoskeleton;ko04530//Tight junction;ko04520//Adherens junction;ko05203//Viral carcinogenesis;ko04670//Leukocyte transendothelial migration;ko05146//Amoebiasis;ko05322//Systemic lupus erythematosus	K05699;K05699;K05699;K05699;K05699;K05699;K05699;K05699	-	-	-
PH1	ncbi_113801930	ncbi_113801930	0.513640615	0.391293115	0.392509561	3.50E-23	9.37E-19	--	PREDICTED: E3 ubiquitin-protein ligase RNF216-like, partial [Hyalella azteca]	-	-	-	-	-	-	-
PH1	ncbi_113803801	MMADHC	1.088964402	0.819906357	0.409425743	3.58E-23	9.59E-19	MMADHC	Methylmalonic aciduria and homocystinuria type D [Daphnia magna]	-	-	-	-	-	-	-
PH1	ncbi_113830011	CAPZB	1.496214185	1.133422012	0.400631587	5.72E-23	1.53E-18	CAPZB	PREDICTED: LOW QUALITY PROTEIN: F-actin-capping protein subunit beta-like [Limulus polyphemus]	Cellular Processes	Transport and catabolism	ko04144//Endocytosis	K10365	-	-	-
PH1	ncbi_113813724	Galphaq	0.78048843	0.586027675	0.413408448	5.72E-23	1.53E-18	Galphaq	Guanine nucleotide-binding protein G(q) subunit alpha [Cerapachys biroi]	Human Diseases;Human Diseases;Environmental Information Processing;Organismal Systems;Organismal Systems;Organismal Systems;Organismal Systems;Human Diseases;Environmental Information Processing;Organismal Systems;Human Diseases;Organismal Systems;Environmental Information Processing;Environmental Information Processing;Organismal Systems;Human Diseases;Organismal Systems;Organismal Systems;Human…	Cancers;Neurodegenerative diseases;Signal transduction;Sensory system;Immune system;Endocrine system;Digestive system;Neurodegenerative diseases;Signal transduction;Circulatory system;Endocrine and metabolic diseases;Digestive system;Signal transduction;Signal transduction;Nervous system;Infectious diseases;Circulatory system;Nervous system;Infectious diseases;Cellular community - eukaryotes;Nerv…	ko05200//Pathways in cancer;ko05016//Huntington disease;ko04015//Rap1 signaling pathway;ko04745//Phototransduction - fly;ko04611//Platelet activation;ko04921//Oxytocin signaling pathway;ko04972//Pancreatic secretion;ko05010//Alzheimer disease;ko04022//cGMP - PKG signaling pathway;ko04261//Adrenergic signaling in cardiomyocytes;ko04934//Cushing syndrome;ko04971//Gastric acid secretion;ko04071//Sph…	K04634;K04634;K04634;K04634;K04634;K04634;K04634;K04634;K04634;K04634;K04634;K04634;K04634;K04634;K04634;K04634;K04634;K04634;K04634;K04634;K04634;K04634;K04634;K04634;K04634;K04634;K04634;K04634;K04634;K04634;K04634;K04634;K04634;K04634;K04634;K04634;K04634;K04634;K04634;K04634;K04634;K04634	-	GO:0005102//receptor binding;GO:0017076//purine nucleotide binding;GO:0017111//nucleoside-triphosphatase activity;GO:0032403//protein complex binding;GO:0032550//purine ribonucleoside binding;GO:0060089//molecular transducer activity	GO:0007166//cell surface receptor signaling pathway
PH1	ncbi_113827391	RTFDC1	0.820810088	0.588374572	0.480313563	6.97E-23	1.87E-18	RTFDC1	PREDICTED: protein RTF2 homolog [Hyalella azteca]	-	-	-	-	-	-	-
PH1	ncbi_113823709	TIGD4	0.444769767	0.307430483	0.532798504	9.34E-23	2.50E-18	TIGD4	PREDICTED: tigger transposable element-derived protein 4 [Alligator sinensis]	-	-	-	-	-	-	-
PH1	ncbi_113804724	porin	1.302507901	0.910623376	0.516365724	9.63E-23	2.58E-18	porin	voltage-dependent anion-selective channel [Eriocheir sinensis]	Human Diseases;Human Diseases;Environmental Information Processing;Cellular Processes;Human Diseases;Environmental Information Processing;Cellular Processes;Organismal Systems;Organismal Systems;Cellular Processes	Neurodegenerative diseases;Infectious diseases;Signal transduction;Cell growth and death;Neurodegenerative diseases;Signal transduction;Cell growth and death;Immune system;Digestive system;Cell growth and death	ko05016//Huntington disease;ko05166//HTLV-I infection;ko04022//cGMP - PKG signaling pathway;ko04217//Necroptosis;ko05012//Parkinson disease;ko04020//Calcium signaling pathway;ko04218//Cellular senescence;ko04621//NOD-like receptor signaling pathway;ko04979//Cholesterol metabolism;ko04216//Ferroptosis	K15040;K15040;K15040;K15040;K15040;K15040;K15040;K15040;K15040;K15040	-	GO:0005244//voltage-gated ion channel activity	GO:0006820//anion transport;GO:0034765//regulation of ion transmembrane transport
PH1	ncbi_113813439	Stoml2	0.469830698	0.309812334	0.600746399	1.51E-22	4.04E-18	Stoml2	PREDICTED: stomatin-like protein 2, mitochondrial [Hyalella azteca]	-	-	-	-	-	-	-
PH1	ncbi_113803205	Emc8	1.263948476	0.971609871	0.379488602	2.17E-22	5.81E-18	Emc8	COX4 neighbor protein, partial [Cherax quadricarinatus]	-	-	-	-	-	-	-
PH1	ncbi_113816060	SCO1	0.557764932	0.404862443	0.462225415	3.64E-22	9.75E-18	SCO1	SCO1, mitochondrial [Daphnia magna]	Human Diseases	Cancers	ko05230//Central carbon metabolism in cancer	K07152	GO:0019866//organelle inner membrane;GO:0043231//intracellular membrane-bounded organelle	GO:0005507//copper ion binding;GO:0009055//electron carrier activity	GO:0000041//transition metal ion transport;GO:0002164//larval development;GO:0007281//germ cell development;GO:0017004//cytochrome complex assembly;GO:0040011//locomotion;GO:0046916//cellular transition metal ion homeostasis
PH1	ncbi_113806395	ncbi_113806395	0.50021145	0.345141841	0.535348701	3.90E-22	1.04E-17	--	-	-	-	-	-	-	-	-
PH1	ncbi_113818033	ADTRP	0.484671964	0.346628231	0.483619474	4.81E-22	1.29E-17	ADTRP	PREDICTED: androgen-induced gene 1 protein isoform X1 [Crassostrea gigas]	-	-	-	-	-	-	-
PH1	ncbi_113812048	CWC15	0.781078106	0.587845842	0.410028953	6.04E-22	1.62E-17	CWC15	PREDICTED: spliceosome-associated protein CWC15 homolog [Hyalella azteca]	Genetic Information Processing	Transcription	ko03040//Spliceosome	K12863	-	-	-
PH1	ncbi_113806765	ube2t	0.517728111	0.389477132	0.410656032	6.52E-22	1.75E-17	ube2t	PREDICTED: ubiquitin-conjugating enzyme E2 T [Aptenodytes forsteri]	Genetic Information Processing	Replication and repair	ko03460//Fanconi anemia pathway	K13960	-	-	-
PH1	ncbi_113828517	Ciao1	0.730254931	0.548490899	0.412932513	1.46E-21	3.91E-17	Ciao1	PREDICTED: probable cytosolic iron-sulfur protein assembly protein CIAO1 [Trichechus manatus latirostris]	-	-	-	-	GO:0043234//protein complex	-	-
PH1	ncbi_113802523	DHX8	0.418378639	0.274268746	0.609218959	2.38E-21	6.38E-17	DHX8	PREDICTED: ATP-dependent RNA helicase DHX8 [Athalia rosae]	Genetic Information Processing	Transcription	ko03040//Spliceosome	K12818	-	GO:0017111//nucleoside-triphosphatase activity;GO:0097159//organic cyclic compound binding;GO:1901363//heterocyclic compound binding	-
PH1	ncbi_113822721	PNN	0.690114998	0.52923451	0.382929647	2.43E-21	6.50E-17	PNN	PREDICTED: dentin sialophosphoprotein-like [Hyalella azteca]	Genetic Information Processing;Genetic Information Processing	Translation;Translation	ko03013//RNA transport;ko03015//mRNA surveillance pathway	K13114;K13114	-	-	-
PH1	ncbi_113817375	POLR2H	1.226703	0.950661406	0.3677825	2.70E-21	7.24E-17	POLR2H	PREDICTED: DNA-directed RNA polymerases I, II, and III subunit RPABC3-like [Hyalella azteca]	Metabolism;Human Diseases;Metabolism;Human Diseases;Metabolism;Genetic Information Processing;Organismal Systems	Global and overview maps;Neurodegenerative diseases;Nucleotide metabolism;Infectious diseases;Nucleotide metabolism;Transcription;Immune system	ko01100//Metabolic pathways;ko05016//Huntington disease;ko00230//Purine metabolism;ko05169//Epstein-Barr virus infection;ko00240//Pyrimidine metabolism;ko03020//RNA polymerase;ko04623//Cytosolic DNA-sensing pathway	K03016;K03016;K03016;K03016;K03016;K03016;K03016	-	-	-
PH1	ncbi_113812398	Dhx15	0.548001138	0.392989367	0.479688611	5.89E-21	1.58E-16	Dhx15	PREDICTED: pre-mRNA-splicing factor ATP-dependent RNA helicase DHX15 isoform X2 [Diachasma alloeum]	Genetic Information Processing	Transcription	ko03040//Spliceosome	K12820	-	-	-
PH1	ncbi_113821439	FTH	0.772361264	0.558341905	0.468126975	6.23E-21	1.67E-16	FTH	ferritin [Marsupenaeus japonicus]	Cellular Processes;Organismal Systems;Cellular Processes	Cell growth and death;Digestive system;Cell growth and death	ko04217//Necroptosis;ko04978//Mineral absorption;ko04216//Ferroptosis	K00522;K00522;K00522	-	-	-
PH1	ncbi_113818563	Gmd	0.421666464	0.29293022	0.525545247	6.62E-21	1.77E-16	Gmd	GDP-mannose 4,6 dehydratase [Orchesella cincta]	Metabolism;Metabolism;Metabolism	Global and overview maps;Carbohydrate metabolism;Carbohydrate metabolism	ko01100//Metabolic pathways;ko00520//Amino sugar and nucleotide sugar metabolism;ko00051//Fructose and mannose metabolism	K01711;K01711;K01711	-	GO:0016836//hydro-lyase activity;GO:0048037//cofactor binding	GO:0009225//nucleotide-sugar metabolic process
PH1	ncbi_113813421	PPT1	0.826609877	0.622741236	0.40857379	7.68E-21	2.06E-16	PPT1	Palmitoyl-protein thioesterase 1 [Trichinella sp. T6]	Metabolism;Cellular Processes;Metabolism;Metabolism	Global and overview maps;Transport and catabolism;Global and overview maps;Lipid metabolism	ko01100//Metabolic pathways;ko04142//Lysosome;ko01212//Fatty acid metabolism;ko00062//Fatty acid elongation	K01074;K01074;K01074;K01074	-	GO:0005488//binding	-
PH1	ncbi_113823161	ncbi_113823161	0.405316107	0.292252826	0.471830535	8.87E-21	2.37E-16	--	AAEL001926-PA [Aedes aegypti]	-	-	-	-	-	-	-
PH1	ncbi_113821327	PICK1	0.577021096	0.405222112	0.509911167	9.55E-21	2.56E-16	PICK1	PREDICTED: PRKCA-binding protein-like isoform X1 [Hyalella azteca]	-	-	-	-	-	-	-
PH1	ncbi_113823825	NFYA	0.470966011	0.348546948	0.434269951	2.37E-20	6.35E-16	NFYA	PREDICTED: nuclear transcription factor Y subunit alpha-like isoform X2 [Hyalella azteca]	Human Diseases;Organismal Systems	Infectious diseases;Immune system	ko05152//Tuberculosis;ko04612//Antigen processing and presentation	K08064;K08064	-	-	-
PH1	ncbi_113826853	VPS35	0.479876453	0.33828507	0.50442352	2.60E-20	6.95E-16	VPS35	Vacuolar protein sorting-associated protein 35 [Zootermopsis nevadensis]	Cellular Processes	Transport and catabolism	ko04144//Endocytosis	K18468	-	-	-
PH1	ncbi_113800036	PRELID1	0.41388081	0.288758318	0.519352849	2.67E-20	7.14E-16	PRELID1	Protein preli-like [Zootermopsis nevadensis]	-	-	-	-	-	-	-
PH1	ncbi_113800158	Galphai	0.498840509	0.349780108	0.51213038	4.09E-20	1.09E-15	Galphai	GTP binding protein alpha subunit Gi [Marsupenaeus japonicus]	Human Diseases;Environmental Information Processing;Organismal Systems;Organismal Systems;Human Diseases;Environmental Information Processing;Organismal Systems;Environmental Information Processing;Organismal Systems;Human Diseases;Organismal Systems;Human Diseases;Environmental Information Processing;Organismal Systems;Organismal Systems;Organismal Systems;Human Diseases;Organismal Systems;Human…	Cancers;Signal transduction;Immune system;Endocrine system;Substance dependence;Signal transduction;Circulatory system;Signal transduction;Immune system;Endocrine and metabolic diseases;Digestive system;Neurodegenerative diseases;Signal transduction;Immune system;Nervous system;Endocrine system;Infectious diseases;Development;Infectious diseases;Nervous system;Cellular community - eukaryotes;Endo…	ko05200//Pathways in cancer;ko04015//Rap1 signaling pathway;ko04611//Platelet activation;ko04921//Oxytocin signaling pathway;ko05034//Alcoholism;ko04022//cGMP - PKG signaling pathway;ko04261//Adrenergic signaling in cardiomyocytes;ko04024//cAMP signaling pathway;ko04670//Leukocyte transendothelial migration;ko04934//Cushing syndrome;ko04971//Gastric acid secretion;ko05012//Parkinson disease;ko040…	K04630;K04630;K04630;K04630;K04630;K04630;K04630;K04630;K04630;K04630;K04630;K04630;K04630;K04630;K04630;K04630;K04630;K04630;K04630;K04630;K04630;K04630;K04630;K04630;K04630;K04630;K04630;K04630;K04630;K04630;K04630;K04630;K04630;K04630;K04630;K04630;K04630;K04630	-	GO:0017076//purine nucleotide binding;GO:0017111//nucleoside-triphosphatase activity;GO:0032403//protein complex binding;GO:0032550//purine ribonucleoside binding;GO:0043169//cation binding;GO:0060089//molecular transducer activity	GO:0007187//G-protein coupled receptor signaling pathway, coupled to cyclic nucleotide second messenger
PH1	ncbi_113803241	glrx3	0.802590568	0.617050527	0.379275573	4.42E-20	1.18E-15	glrx3	PREDICTED: glutaredoxin-3-like [Hyalella azteca]	-	-	-	-	GO:0031674//I band;GO:0031988//membrane-bounded vesicle	GO:0003723//RNA binding;GO:0015036//disulfide oxidoreductase activity	GO:0010611//regulation of cardiac muscle hypertrophy;GO:0019725//cellular homeostasis;GO:0044710//single-organism metabolic process
PH1	ncbi_113821585	tomm20	0.611958014	0.446297192	0.455427945	5.80E-20	1.55E-15	tomm20	PREDICTED: mitochondrial import receptor subunit TOM20 homolog [Agrilus planipennis]	-	-	-	-	-	-	-
PH1	ncbi_113826183	Chtop	0.525493055	0.360382462	0.544142895	5.92E-20	1.59E-15	Chtop	PREDICTED: chromatin target of PRMT1 protein [Fundulus heteroclitus]	-	-	-	-	-	-	-
PH1	ncbi_113800968	ncbi_113800968	0.486832905	0.343391908	0.503570639	8.60E-20	2.30E-15	--	PREDICTED: uncharacterized protein LOC108675787 isoform X2 [Hyalella azteca]	-	-	-	-	-	-	-
PH1	ncbi_113800449	ncbi_113800449	0.537426787	0.419805408	0.356347478	1.36E-19	3.64E-15	--	PREDICTED: zinc finger protein OZF-like [Nothobranchius furzeri]	-	-	-	-	-	-	-
PH1	ncbi_113823507	Vkorc1l1	0.583898302	0.442734118	0.399276563	2.74E-19	7.33E-15	Vkorc1l1	vitamin K epoxide reductase complex subunit 1 precursor [Ixodes scapularis]	Metabolism	Metabolism of cofactors and vitamins	ko00130//Ubiquinone and other terpenoid-quinone biosynthesis	K05357	-	-	-
PH1	ncbi_113801629	ncbi_113801629	0.852750453	0.647105965	0.398121641	2.97E-19	7.95E-15	--	PREDICTED: membrane protein FAM174B-like [Vollenhovia emeryi]	-	-	-	-	-	-	-
PH1	ncbi_113829022	HDAC3	0.485562585	0.342386639	0.504030856	6.06E-19	1.62E-14	HDAC3	PREDICTED: histone deacetylase 3-like [Hyalella azteca]	Human Diseases;Organismal Systems;Human Diseases;Human Diseases	Infectious diseases;Endocrine system;Substance dependence;Cancers	ko05165//Human papillomavirus infection;ko04919//Thyroid hormone signaling pathway;ko05034//Alcoholism;ko05203//Viral carcinogenesis	K11404;K11404;K11404;K11404	GO:0043231//intracellular membrane-bounded organelle	GO:0017136//NAD-dependent histone deacetylase activity	GO:0010468//regulation of gene expression;GO:0016575//histone deacetylation;GO:0034645//cellular macromolecule biosynthetic process
PH1	ncbi_113819921	Twistnb	0.511265907	0.392935573	0.379781041	7.90E-19	2.12E-14	Twistnb	PREDICTED: DNA-directed RNA polymerase I subunit RPA43 isoform X1 [Oreochromis niloticus]	Metabolism;Metabolism;Metabolism;Genetic Information Processing	Global and overview maps;Nucleotide metabolism;Nucleotide metabolism;Transcription	ko01100//Metabolic pathways;ko00230//Purine metabolism;ko00240//Pyrimidine metabolism;ko03020//RNA polymerase	K03004;K03004;K03004;K03004	-	-	-
PH1	ncbi_113824584	ncbi_113824584	0.464172763	0.344106674	0.431805995	8.55E-19	2.29E-14	--	AGAP005843-PA [Anopheles gambiae str. PEST] [Anopheles gambiae]	-	-	-	-	-	-	-
PH1	ncbi_113826162	Lpcat3	0.482562258	0.345456652	0.482210394	1.03E-18	2.77E-14	Lpcat3	Lysophospholipid acyltransferase 5 [Zootermopsis nevadensis]	Metabolism;Cellular Processes	Lipid metabolism;Cell growth and death	ko00564//Glycerophospholipid metabolism;ko04216//Ferroptosis	K13515;K13515	-	-	-
PH1	ncbi_113826196	ncbi_113826196	0.5283861	0.401013782	0.397940696	1.56E-18	4.18E-14	--	PREDICTED: nuclear nucleic acid-binding protein C1D-like [Hyalella azteca]	Genetic Information Processing	Folding, sorting and degradation	ko03018//RNA degradation	K12592	-	-	-
PH1	ncbi_113808972	ncbi_113808972	0.478255246	0.373357963	0.357221291	1.56E-18	4.19E-14	--	-	-	-	-	-	-	-	-
PH1	ncbi_113808990	Srprb	0.603360915	0.442372168	0.447760622	1.83E-18	4.90E-14	Srprb	PREDICTED: signal recognition particle receptor subunit beta-like [Aplysia californica]	Genetic Information Processing	Folding, sorting and degradation	ko03060//Protein export	K12272	-	-	-
PH1	ncbi_113806634	ncbi_113806634	0.683094228	0.498835175	0.453521403	5.54E-18	1.48E-13	--	Polyadenylate-binding protein, cytoplasmic and nuclear [Exaiptasia pallida]	-	-	-	-	-	-	-
PH1	ncbi_113800156	ncbi_113800156	0.501286021	0.37806735	0.40699074	1.25E-17	3.35E-13	--	PREDICTED: 39S ribosomal protein L42, mitochondrial-like [Hyalella azteca]	-	-	-	-	-	-	-
PH1	ncbi_113802276	blp	0.457703572	0.334855634	0.450874307	1.55E-17	4.16E-13	blp	mitochondria-associated granulocyte macrophage CSF signaling molecule [Bombyx mori]	-	-	-	-	-	-	GO:0006839//mitochondrial transport
PH1	ncbi_113817161	apmap	0.567261427	0.415745615	0.448312719	1.56E-17	4.18E-13	apmap	PREDICTED: adipocyte plasma membrane-associated protein-like [Hyalella azteca]	-	-	-	-	-	-	-
PH1	ncbi_113823598	ncbi_113823598	0.432029458	0.304020245	0.506962288	3.07E-17	8.23E-13	--	PREDICTED: heme oxygenase 1-like [Hyalella azteca]	Metabolism;Metabolism;Organismal Systems	Global and overview maps;Metabolism of cofactors and vitamins;Digestive system	ko01100//Metabolic pathways;ko00860//Porphyrin and chlorophyll metabolism;ko04978//Mineral absorption	K21418;K21418;K21418	-	-	-
PH1	ncbi_113830594	Pdpk1	0.728164028	0.550276662	0.404106328	3.71E-17	9.93E-13	Pdpk1	3-phosphoinositide-dependent protein kinase 1 [Zootermopsis nevadensis]	Cellular Processes;Human Diseases;Environmental Information Processing;Organismal Systems;Cellular Processes;Human Diseases;Environmental Information Processing;Cellular Processes;Environmental Information Processing;Organismal Systems;Environmental Information Processing;Environmental Information Processing;Human Diseases;Human Diseases;Human Diseases;Organismal Systems;Human Diseases;Organismal…	Cellular community - eukaryotes;Cancers;Signal transduction;Endocrine system;Cell growth and death;Cancers;Signal transduction;Transport and catabolism;Signal transduction;Endocrine system;Signal transduction;Signal transduction;Drug resistance;Cancers;Infectious diseases;Nervous system;Endocrine and metabolic diseases;Endocrine system;Infectious diseases;Cancers;Cancers;Immune system;Excretory s…	ko04510//Focal adhesion;ko05205//Proteoglycans in cancer;ko04151//PI3K-Akt signaling pathway;ko04919//Thyroid hormone signaling pathway;ko04210//Apoptosis;ko05231//Choline metabolism in cancer;ko04150//mTOR signaling pathway;ko04140//Autophagy - animal;ko04071//Sphingolipid signaling pathway;ko04910//Insulin signaling pathway;ko04068//FoxO signaling pathway;ko04152//AMPK signaling pathway;ko01524…	K06276;K06276;K06276;K06276;K06276;K06276;K06276;K06276;K06276;K06276;K06276;K06276;K06276;K06276;K06276;K06276;K06276;K06276;K06276;K06276;K06276;K06276;K06276;K06276	-	-	-
PH1	ncbi_113815021	timm22	0.440315799	0.32479549	0.439007009	3.84E-17	1.03E-12	timm22	PREDICTED: mitochondrial import inner membrane translocase subunit Tim22 [Polistes dominula]	-	-	-	-	-	-	-
PH1	ncbi_113823857	Lrrc47	0.582168078	0.450818159	0.368890105	4.30E-17	1.15E-12	Lrrc47	PREDICTED: leucine-rich repeat-containing protein 47-like [Neodiprion lecontei]	-	-	-	-	-	-	-
PH1	ncbi_113821210	ncbi_113821210	0.694877791	0.520034531	0.418151848	5.60E-17	1.50E-12	--	PREDICTED: uncharacterized protein LOC108675046 [Hyalella azteca]	-	-	-	-	-	-	-
PH1	ncbi_113818836	Cnpy4	0.496495151	0.35011936	0.503932787	7.04E-17	1.89E-12	Cnpy4	PREDICTED: protein canopy homolog 4-like [Hyalella azteca]	-	-	-	-	-	-	-
PH1	ncbi_113817810	sde2	0.659098921	0.514917866	0.356152681	2.64E-16	7.06E-12	sde2	PREDICTED: protein SDE2 homolog [Hyalella azteca]	-	-	-	-	-	-	-
PH1	ncbi_113809995	WDR44	0.504579499	0.379347541	0.411561404	7.29E-16	1.95E-11	WDR44	PREDICTED: WD repeat-containing protein 44 [Orussus abietinus]	-	-	-	-	-	-	-
PH1	ncbi_113802225	ncbi_113802225	0.471195465	0.360905436	0.384704778	9.60E-16	2.57E-11	--	PREDICTED: trihelix transcription factor GTL1-like [Scleropages formosus]	-	-	-	-	-	-	-
PH1	ncbi_113830393	ncbi_113830393	0.422391751	0.312335849	0.435483493	1.72E-15	4.62E-11	--	PREDICTED: UPF0449 protein C19orf25 homolog [Pygocentrus nattereri]	-	-	-	-	-	-	-
PH1	ncbi_113800852	ncbi_113800852	0.44779569	0.325021928	0.462303589	7.57E-15	2.03E-10	--	39S ribosomal protein L48 [Daphnia magna]	-	-	-	-	-	-	-
PH1	ncbi_113810790	ncbi_113810790	0.453118986	0.333312958	0.443012535	7.69E-15	2.06E-10	--	Septin-12, partial [Stegodyphus mimosarum]	-	-	-	-	-	-	-
PH1	ncbi_113828229	EloA	0.567333678	0.441964107	0.360268298	7.76E-15	2.08E-10	EloA	PREDICTED: transcription elongation factor B polypeptide 3-like isoform X1 [Hyalella azteca]	-	-	-	-	-	-	-
PH1	ncbi_113819725	TXNL1	0.528610491	0.40845664	0.372022119	1.38E-14	3.68E-10	TXNL1	PREDICTED: thioredoxin-like protein 1 [Hyalella azteca]	-	-	-	-	-	-	-
PH1	ncbi_113803606	Eif4e2	0.477552343	0.369825131	0.368815608	2.84E-14	7.61E-10	Eif4e2	eukaryotic initiation factor elF4E like protein, partial [Marsupenaeus japonicus]	Environmental Information Processing;Genetic Information Processing;Environmental Information Processing;Organismal Systems;Environmental Information Processing;Organismal Systems;Human Diseases	Signal transduction;Translation;Signal transduction;Endocrine system;Signal transduction;Aging;Drug resistance	ko04151//PI3K-Akt signaling pathway;ko03013//RNA transport;ko04150//mTOR signaling pathway;ko04910//Insulin signaling pathway;ko04066//HIF-1 signaling pathway;ko04211//Longevity regulating pathway - mammal;ko01521//EGFR tyrosine kinase inhibitor resistance	K03259;K03259;K03259;K03259;K03259;K03259;K03259	-	-	-
PH1	ncbi_113829826	ncbi_113829826	0.530310899	0.410827275	0.368306433	6.06E-14	1.62E-09	--	Coiled-coil-helix-coiled-coil-helix domain-containing protein 1 [Zootermopsis nevadensis]	-	-	-	-	-	-	-
PH1	ncbi_113806834	rpl-7	1.183473914	0.916675829	0.368544368	1.17E-13	3.14E-09	rpl-7	ribosomal protein L7 [Litopenaeus vannamei]	Genetic Information Processing	Translation	ko03010//Ribosome	K02937	-	-	-
PH1	ncbi_113805167	RABAC1	0.681483398	0.524747681	0.377054625	1.29E-13	3.45E-09	RABAC1	Prenylated Rab acceptor protein 1 [Zootermopsis nevadensis]	-	-	-	-	-	-	-
PH1	ncbi_113826520	EMC6	0.635723453	0.49061429	0.373810058	5.04E-13	1.35E-08	EMC6	PREDICTED: ER membrane protein complex subunit 6-like [Hyalella azteca]	-	-	-	-	GO:0031224//intrinsic component of membrane;GO:0043234//protein complex	-	-
PH1	ncbi_113822660	CG5021	0.581384446	0.447238687	0.378447487	6.01E-13	1.61E-08	CG5021	PREDICTED: uncharacterized Golgi apparatus membrane protein-like protein CG5021 isoform X1 [Hyalella azteca]	-	-	-	-	-	-	-
PH1	ncbi_113803328	ncbi_113803328	0.430154545	0.322158578	0.417084075	8.83E-13	2.37E-08	--	-	-	-	-	-	-	-	-
PH1	ncbi_113828346	tmem203	0.457018979	0.347745764	0.394221137	1.95E-12	5.22E-08	tmem203	PREDICTED: transmembrane protein 203-like [Hyalella azteca]	-	-	-	-	-	-	-
PH1	ncbi_113806193	MRPS5	0.456918676	0.351768371	0.377311644	2.27E-12	6.09E-08	MRPS5	28S ribosomal protein S5, mitochondrial [Zootermopsis nevadensis]	Genetic Information Processing	Translation	ko03010//Ribosome	K02988	GO:0030529//intracellular ribonucleoprotein complex	-	-
PH1	ncbi_113828348	TIMM29	0.463544537	0.361094589	0.360331156	2.75E-12	7.36E-08	TIMM29	hypothetical protein L798_09641 [Zootermopsis nevadensis]	-	-	-	-	-	-	-
PH1	ncbi_113823997	ncbi_113823997	0.493464715	0.379396604	0.379240163	9.50E-11	2.55E-06	--	PREDICTED: interferon alpha-inducible protein 27-like protein 2A [Pygocentrus nattereri]	-	-	-	-	-	-	-
PH1	ncbi_113825445	Mrps23	0.415526537	0.321206903	0.37143772	1.47E-10	3.95E-06	Mrps23	PREDICTED: 28S ribosomal protein S23, mitochondrial-like isoform X1 [Priapulus caudatus]	-	-	-	-	GO:0005840//ribosome	-	GO:0006412//translation
PH1	ncbi_113829282	casc3	0.447188403	0.348635614	0.359162821	2.02E-10	5.41E-06	casc3	PREDICTED: protein CASC3 [Dinoponera quadriceps]	Genetic Information Processing;Genetic Information Processing	Translation;Translation	ko03013//RNA transport;ko03015//mRNA surveillance pathway	K14323;K14323	-	-	-
PH1	ncbi_113801840	CPIJ005690	0.442492098	0.344296826	0.361998812	1.59E-09	4.25E-05	CPIJ005690	ATPase ASNA1-like protein [Zootermopsis nevadensis]	-	-	-	-	-	-	-
