# Supplementary material for: Single-cell RNA sequencing analysis of shrimp immune cells identifies macrophage-like phagocytes
Source: eLife. 2022 Oct 6;11:e80127. doi: 10.7554/eLife.80127 (PMC9584607; doi:10.7554/eLife.80127)
Supplement: Supplementary file 4. [file elife-80127-supp4.csv]

Target_Cluster	Gene ID	Gene Name	Target_Cluster_mean	Other_Cluster_mean	Log2FC	Pvalue	Qvalue	Symbol	Description	KEGG_A_class	KEGG_B_class	Pathway	K_ID	GO Component	GO Function	GO Process
GH2	ncbi_113801830	ncbi_113801830	17.37934239	0.220716926	6.299032415	0	0	--	crustin-like antimicrobial peptide [Fenneropenaeus chinensis]	-	-	-	-	-	-	-
GH2	ncbi_113800184	PPAF3	0.947581212	0.012300377	6.267475155	0	0	PPAF3	serine protease [Scylla paramamosain]	-	-	-	-	-	-	-
GH2	ncbi_113801828	ncbi_113801828	24.91625095	0.38647524	6.010567209	0	0	--	crustin-like antimicrobial peptide [Fenneropenaeus chinensis]	-	-	-	-	-	-	-
GH2	ncbi_113801827	ncbi_113801827	17.10996861	0.27176563	5.97633029	0	0	--	crustin-like antimicrobial peptide [Fenneropenaeus chinensis]	-	-	-	-	-	-	-
GH2	ncbi_113820161	Pxt	3.081392991	0.052490852	5.875372868	0	0	Pxt	peroxinectin [Fenneropenaeus merguiensis]	-	-	-	-	-	-	-
GH2	ncbi_113810905	ncbi_113810905	81.44540158	1.774163004	5.520622776	0	0	--	PREDICTED: WW domain-containing protein C660.06-like [Hyalella azteca]	-	-	-	-	-	-	-
GH2	ncbi_113810909	ncbi_113810909	2.832550599	0.06615106	5.420193644	0	0	--	PREDICTED: WW domain-containing protein C660.06-like [Hyalella azteca]	-	-	-	-	-	-	-
GH2	ncbi_113801821	ncbi_113801821	7.60466441	0.222569383	5.094557534	0	0	--	crustin-like antimicrobial peptide [Fenneropenaeus chinensis]	-	-	-	-	-	-	-
GH2	ncbi_113804200	PPAF2	1.699521783	0.052229791	5.024112103	0	0	PPAF2	masquerade-like protein [Pacifastacus leniusculus]	-	-	-	-	-	-	-
GH2	ncbi_113811243	ncbi_113811243	85.44173185	2.724132744	4.971071979	0	0	--	-	-	-	-	-	-	-	-
GH2	ncbi_113806994	ENPP3	1.223948721	0.042648312	4.842910676	0	0	ENPP3	PREDICTED: venom phosphodiesterase 2-like [Hyalella azteca]	Metabolism;Metabolism;Metabolism;Metabolism;Metabolism;Metabolism;Metabolism	Global and overview maps;Nucleotide metabolism;Nucleotide metabolism;Carbohydrate metabolism;Metabolism of cofactors and vitamins;Metabolism of cofactors and vitamins;Metabolism of cofactors and vitamins	ko01100//Metabolic pathways;ko00230//Purine metabolism;ko00240//Pyrimidine metabolism;ko00500//Starch and sucrose metabolism;ko00760//Nicotinate and nicotinamide metabolism;ko00770//Pantothenate and CoA biosynthesis;ko00740//Riboflavin metabolism	K01513;K01513;K01513;K01513;K01513;K01513;K01513	-	GO:0003824//catalytic activity	-
GH2	ncbi_113808014	ncbi_113808014	244.9096334	9.443349443	4.696807055	0	0	--	-	-	-	-	-	-	-	-
GH2	ncbi_113802496	PPAF2	56.58232856	2.24691857	4.654331804	0	0	PPAF2	mas [Litopenaeus vannamei]	-	-	-	-	-	-	-
GH2	ncbi_113808543	ncbi_113808543	13.21922483	0.568945376	4.538203624	0	0	--	single whey acidic protein domain-containing protein isoform 3 [Penaeus monodon]	-	-	-	-	-	-	-
GH2	ncbi_113820150	Pxt	15.09469082	0.737454731	4.355342905	0	0	Pxt	peroxinectin [Fenneropenaeus chinensis]	-	-	-	-	-	-	-
GH2	ncbi_113819749	ncbi_113819749	3.280258781	0.196892857	4.058326956	0	0	--	X-linked interleukin-1 receptor accessory protein-like 1 [Zootermopsis nevadensis]	-	-	-	-	-	-	-
GH2	ncbi_113816771	ncbi_113816771	1.558413359	0.097714985	3.995354324	0	0	--	-	-	-	-	-	-	-	-
GH2	ncbi_113828571	SLC5A1	1.597232493	0.107660205	3.891017349	0	0	SLC5A1	Sodium/glucose cotransporter [Daphnia magna]	-	-	-	-	-	-	-
GH2	ncbi_113802330	lcc1	1.440421006	0.099398015	3.857129695	0	0	lcc1	PREDICTED: L-ascorbate oxidase-like [Anoplophora glabripennis]	-	-	-	-	-	-	-
GH2	ncbi_113807427	snk	1.572523162	0.111249571	3.821209584	0	0	snk	clip domain serine proteinase 3 [Portunus trituberculatus]	-	-	-	-	-	-	-
GH2	ncbi_113828690	ncbi_113828690	8.20322809	0.592739224	3.790722308	0	0	--	-	-	-	-	-	-	-	-
GH2	ncbi_113810910	ncbi_113810910	31.80994111	2.872228806	3.469235115	0	0	--	-	-	-	-	-	-	-	-
GH2	ncbi_113801825	ncbi_113801825	969.134869	87.67510945	3.46645822	0	0	--	crustin, partial [Litopenaeus vannamei]	-	-	-	-	-	-	-
GH2	ncbi_113829072	ncbi_113829072	1.483483459	0.137277455	3.433822227	0	0	--	-	-	-	-	-	-	-	-
GH2	ncbi_113808998	PEN-3	5.0090828	0.473812638	3.402157873	0	0	PEN-3	antimicrobial peptide penaeidin 3 [Litopenaeus stylirostris]	-	-	-	-	-	-	-
GH2	ncbi_113800561	ncbi_113800561	0.86878309	0.085659809	3.342305652	0	0	--	PREDICTED: uncharacterized protein LOC108669104 [Hyalella azteca]	-	-	-	-	-	-	-
GH2	ncbi_113822132	ncbi_113822132	1.090088936	0.10816992	3.333074567	0	0	--	PREDICTED: tyrosine-protein phosphatase Lar-like isoform X2 [Solenopsis invicta]	-	-	-	-	-	-	-
GH2	ncbi_113816267	ncbi_113816267	408.9567844	43.7648631	3.224103435	0	0	--	crustin-like protein [Litopenaeus vannamei]	-	-	-	-	-	-	-
GH2	ncbi_113817626	ANPEP	1.600836507	0.172507351	3.214096229	0	0	ANPEP	PREDICTED: aminopeptidase N-like [Hyalella azteca]	Metabolism;Metabolism;Organismal Systems;Organismal Systems	Global and overview maps;Metabolism of other amino acids;Endocrine system;Immune system	ko01100//Metabolic pathways;ko00480//Glutathione metabolism;ko04614//Renin-angiotensin system;ko04640//Hematopoietic cell lineage	K11140;K11140;K11140;K11140	-	-	-
GH2	ncbi_113819849	ncbi_113819849	3.331879727	0.363425833	3.196603446	0	0	--	-	-	-	-	-	-	-	-
GH2	ncbi_113826286	ncbi_113826286	19.34092713	2.114611536	3.193192391	0	0	--	-	-	-	-	-	-	-	-
GH2	ncbi_113815309	ncbi_113815309	1.580698653	0.174986535	3.175246539	0	0	--	mannose-binding protein [Procambarus clarkii]	-	-	-	-	-	-	-
GH2	ncbi_113809088	PPAF2	0.951669969	0.107832824	3.141664945	0	0	PPAF2	serine proteinase [Eriocheir sinensis]	-	-	-	-	-	-	-
GH2	ncbi_113807410	PPAF2	2.571326454	0.293355688	3.131789914	0	0	PPAF2	serine protease [Penaeus monodon]	-	-	-	-	-	-	-
GH2	ncbi_113816329	ncbi_113816329	10.46473189	1.201785031	3.122284587	0	0	--	PREDICTED: pentraxin-related protein PTX3-like [Hyalella azteca]	-	-	-	-	-	-	-
GH2	ncbi_113803500	ncbi_113803500	3.310680055	0.388183055	3.092318548	0	0	--	-	-	-	-	-	-	-	-
GH2	ncbi_113808997	PEN-3	968.0206252	116.2562329	3.05772972	0	0	PEN-3	penaeidin 3a.1 [Litopenaeus vannamei]	-	-	-	-	-	-	-
GH2	ncbi_113828680	MP1	2.221841059	0.271987071	3.030145639	0	0	MP1	serine proteinase [Litopenaeus vannamei]	-	-	-	-	-	GO:0016787//hydrolase activity	-
GH2	ncbi_113828684	PPAF1	1.532692665	0.194462107	2.978507471	0	0	PPAF1	serine protease [Fenneropenaeus chinensis]	-	-	-	-	-	GO:0003824//catalytic activity	-
GH2	ncbi_113801959	LIPF	2.39384287	0.314463774	2.928362726	0	0	LIPF	triacylglycerol lipase [Portunus trituberculatus]	Cellular Processes;Organismal Systems;Metabolism	Transport and catabolism;Digestive system;Lipid metabolism	ko04142//Lysosome;ko04979//Cholesterol metabolism;ko00100//Steroid biosynthesis	K01052;K01052;K01052	-	-	-
GH2	ncbi_113814570	ncbi_113814570	31.81508161	4.199357938	2.921470154	0	0	--	PREDICTED: pacifastin-like protease inhibitor cvp4 isoform X4 [Anoplophora glabripennis]	-	-	-	-	-	-	-
GH2	ncbi_113815329	Spon2	1.99379605	0.278114219	2.841768427	0	0	Spon2	PREDICTED: spondin-2-like [Hyalella azteca]	-	-	-	-	-	-	-
GH2	ncbi_113828682	MP1	1.166240899	0.163645521	2.833219799	0	0	MP1	trypsin-like serine proteinase [Fenneropenaeus chinensis]	-	-	-	-	-	GO:0003824//catalytic activity	-
GH2	ncbi_113813586	Soat1	1.67936329	0.236429155	2.828434498	0	0	Soat1	PREDICTED: sterol O-acyltransferase 1-like [Hyalella azteca]	Organismal Systems;Metabolism	Digestive system;Lipid metabolism	ko04979//Cholesterol metabolism;ko00100//Steroid biosynthesis	K00637;K00637	-	-	-
GH2	ncbi_113828089	ncbi_113828089	4.0248532	0.603965033	2.736399233	0	0	--	-	-	-	-	-	-	-	-
GH2	ncbi_113818642	CG2145	12.15091534	1.993766146	2.60749689	0	0	CG2145	PREDICTED: poly(U)-specific endoribonuclease-A-like [Hyalella azteca]	-	-	-	-	-	-	-
GH2	ncbi_113803524	ncbi_113803524	3.906535041	0.660427236	2.564418032	0	0	--	-	-	-	-	-	-	-	-
GH2	ncbi_113820206	ncbi_113820206	489.2782329	87.08412842	2.490173393	0	0	--	single WAP domain protein [Litopenaeus vannamei]	-	-	-	-	-	-	-
GH2	ncbi_113809546	ncbi_113809546	10.18902816	1.891268573	2.429590297	0	0	--	-	-	-	-	-	-	-	-
GH2	ncbi_113814568	Ppn	2.244984098	0.432760474	2.375064583	0	0	Ppn	pacifastin light chain-like serine proteinase inhibitor [Litopenaeus vannamei]	-	-	-	-	-	-	-
GH2	ncbi_113803873	ncbi_113803873	43.32196573	8.425364152	2.362287759	0	0	--	Kazal-type proteinase inhibitor [Litopenaeus vannamei]	-	-	-	-	-	-	-
GH2	ncbi_113808589	ncbi_113808589	114.3553768	22.26618337	2.360598008	0	0	--	crustacean hematopoietic factor-like protein [Litopenaeus vannamei]	-	-	-	-	-	-	-
GH2	ncbi_113802754	ncbi_113802754	37.96638995	7.731527986	2.295897358	0	0	--	crustacean hematopoietic factor-like protein [Litopenaeus vannamei]	-	-	-	-	-	-	-
GH2	ncbi_113800690	ncbi_113800690	27.5660519	5.698908623	2.274135089	0	0	--	-	-	-	-	-	-	-	-
GH2	ncbi_113828686	SPE	2.053336425	0.425388961	2.27111552	0	0	SPE	serine proteinase homologue, partial [Marsupenaeus japonicus]	-	-	-	-	-	GO:0003824//catalytic activity	-
GH2	ncbi_113828683	PPAF1	3.338247531	0.698453364	2.25685524	0	0	PPAF1	serine proteinase homologue, partial [Marsupenaeus japonicus]	-	-	-	-	-	-	-
GH2	ncbi_113825375	ncbi_113825375	4.51937575	0.955127257	2.242358641	0	0	--	-	-	-	-	-	-	-	-
GH2	ncbi_113817651	PPAF3	1.972579956	0.427056194	2.207585955	0	0	PPAF3	serine protease [Scylla paramamosain]	-	-	-	-	-	-	-
GH2	ncbi_113812972	Ces2c	7.719383044	1.709320559	2.175062568	0	0	Ces2c	juvenile hormone esterase-like carboxylesterase 1 [Eriocheir sinensis]	Metabolism	Metabolism of terpenoids and polyketides	ko00981//Insect hormone biosynthesis	K01063	-	-	-
GH2	ncbi_113809076	PPAF2	1.919074725	0.447785604	2.099530835	0	0	PPAF2	serine proteinase 1 [Portunus trituberculatus]	-	-	-	-	-	-	-
GH2	ncbi_113816845	ca2	1.064914339	0.265477197	2.004077535	0	0	ca2	carbonic anhydrase I [Litopenaeus vannamei]	Metabolism	Energy metabolism	ko00910//Nitrogen metabolism	K01672	-	GO:0016836//hydro-lyase activity	GO:0044237//cellular metabolic process
GH2	ncbi_113807911	rgn	6.268028696	1.576873536	1.990944823	0	0	rgn	PREDICTED: regucalcin-like isoform X2 [Acromyrmex echinatior]	Metabolism;Metabolism;Metabolism;Metabolism	Global and overview maps;Global and overview maps;Carbohydrate metabolism;Carbohydrate metabolism	ko01100//Metabolic pathways;ko01200//Carbon metabolism;ko00053//Ascorbate and aldarate metabolism;ko00030//Pentose phosphate pathway	K01053;K01053;K01053;K01053	-	-	-
GH2	ncbi_113815775	ncbi_113815775	507.3332039	135.7799175	1.901663471	0	0	--	secretory leukocyte proteinase inhibitor [Litopenaeus vannamei]	-	-	-	-	-	-	-
GH2	ncbi_113820080	ncbi_113820080	0.828599537	0.222380877	1.897642283	0	0	--	-	-	-	-	-	-	-	-
GH2	ncbi_113802698	Fli1	1.940765009	0.541834913	1.840700183	0	0	Fli1	PREDICTED: transcriptional regulator ERG isoform X5 [Bos taurus]	-	-	-	-	-	-	-
GH2	ncbi_113810844	ncbi_113810844	3.910637057	1.107951588	1.819508803	0	0	--	-	-	-	-	-	-	-	-
GH2	ncbi_113830428	ncbi_113830428	9.026199628	2.622754396	1.783035972	0	0	--	rhodanese 1-like protein [Macrobrachium nipponense]	-	-	-	-	-	-	-
GH2	ncbi_113803502	ncbi_113803502	8.93595724	2.661805012	1.74721739	0	0	--	-	-	-	-	-	-	-	-
GH2	ncbi_113828743	PPO1	50.24203658	15.39141814	1.70676878	0	0	PPO1	prophenoloxidase 2 [Litopenaeus vannamei]	-	-	-	-	-	-	-
GH2	ncbi_113828564	PPAF2	1.727329083	0.531171396	1.701293602	0	0	PPAF2	prophenoloxidase activating factor [Litopenaeus vannamei]	-	-	-	-	-	-	-
GH2	ncbi_113813620	ncbi_113813620	0.960379798	0.308746084	1.637184218	0	0	--	NAD(P)H-dependent FMN reductase C4B3.06c [Orchesella cincta]	-	-	-	-	-	-	-
GH2	ncbi_113816893	ncbi_113816893	5.21210528	1.696917202	1.618950053	0	0	--	hypothetical protein X975_08902, partial [Stegodyphus mimosarum]	-	-	-	-	-	-	-
GH2	ncbi_113817634	GstD1	2.876871221	0.988930697	1.540559314	0	0	GstD1	PREDICTED: protein URE2-like [Drosophila biarmipes]	Human Diseases;Human Diseases;Human Diseases;Metabolism;Metabolism;Organismal Systems;Human Diseases;Human Diseases;Human Diseases;Metabolism;Metabolism	Cancers;Cancers;Cardiovascular diseases;Metabolism of other amino acids;Xenobiotics biodegradation and metabolism;Aging;Drug resistance;Cancers;Cancers;Xenobiotics biodegradation and metabolism;Xenobiotics biodegradation and metabolism	ko05200//Pathways in cancer;ko05225//Hepatocellular carcinoma;ko05418//Fluid shear stress and atherosclerosis;ko00480//Glutathione metabolism;ko00983//Drug metabolism - other enzymes;ko04212//Longevity regulating pathway - worm;ko01524//Platinum drug resistance;ko05215//Prostate cancer;ko05204//Chemical carcinogenesis;ko00980//Metabolism of xenobiotics by cytochrome P450;ko00982//Drug metabolism …	K00799;K00799;K00799;K00799;K00799;K00799;K00799;K00799;K00799;K00799;K00799	-	-	-
GH2	ncbi_113808796	ncbi_113808796	2.092066241	0.719826856	1.539206698	0	0	--	-	-	-	-	-	-	-	-
GH2	ncbi_113821158	ncbi_113821158	19.00085635	6.587487986	1.52826411	0	0	--	crustin 2 [Panulirus japonicus]	-	-	-	-	-	-	-
GH2	ncbi_113810045	ncbi_113810045	6.188729008	2.146920076	1.527374666	0	0	--	anti-lipopolysaccharide factor [Litopenaeus stylirostris]	-	-	-	-	-	-	-
GH2	ncbi_113825264	EPHX4	1.374650403	0.478141958	1.523553848	0	0	EPHX4	PREDICTED: epoxide hydrolase 4-like [Hyalella azteca]	-	-	-	-	-	-	-
GH2	ncbi_113813063	ncbi_113813063	9.72183498	3.434492478	1.501131721	0	0	--	PREDICTED: uncharacterized protein LOC108679670 [Hyalella azteca]	-	-	-	-	-	-	-
GH2	ncbi_113818944	ncbi_113818944	105.307677	38.24153947	1.461398106	0	0	--	-	-	-	-	-	-	-	-
GH2	ncbi_113830625	ncbi_113830625	9.87562976	3.740436913	1.400665952	0	0	--	antilipopolysaccharide factor isoform 5 [Fenneropenaeus chinensis]	-	-	-	-	-	-	-
GH2	ncbi_113819972	ncbi_113819972	3.54467912	1.350182782	1.392500308	0	0	--	PREDICTED: uncharacterized protein LOC108665911 [Hyalella azteca]	-	-	-	-	-	-	-
GH2	ncbi_113810214	ncbi_113810214	5.920186673	2.348104905	1.334145803	0	0	--	-	-	-	-	-	-	-	-
GH2	ncbi_113800363	ncbi_113800363	266.6750554	107.0751531	1.316459142	0	0	--	anti-lipopolysaccharide AV-R isoform [Litopenaeus vannamei]	-	-	-	-	-	-	-
GH2	ncbi_113811237	Arg2	3.109056064	1.318539909	1.237535394	0	0	Arg2	PREDICTED: arginase-1 isoform X2 [Nanorana parkeri]	Metabolism;Metabolism;Human Diseases;Metabolism;Metabolism	Global and overview maps;Global and overview maps;Infectious diseases;Amino acid metabolism;Amino acid metabolism	ko01100//Metabolic pathways;ko01230//Biosynthesis of amino acids;ko05146//Amoebiasis;ko00330//Arginine and proline metabolism;ko00220//Arginine biosynthesis	K01476;K01476;K01476;K01476;K01476	-	GO:0016787//hydrolase activity	-
GH2	ncbi_113808337	Ald	46.94363019	20.88313387	1.168591181	0	0	Ald	fructose 1,6-biphosphate-aldolase A [Fenneropenaeus chinensis]	Metabolism;Metabolism;Metabolism;Metabolism;Environmental Information Processing;Metabolism;Metabolism	Global and overview maps;Global and overview maps;Carbohydrate metabolism;Global and overview maps;Signal transduction;Carbohydrate metabolism;Carbohydrate metabolism	ko01100//Metabolic pathways;ko01200//Carbon metabolism;ko00010//Glycolysis / Gluconeogenesis;ko01230//Biosynthesis of amino acids;ko04066//HIF-1 signaling pathway;ko00051//Fructose and mannose metabolism;ko00030//Pentose phosphate pathway	K01623;K01623;K01623;K01623;K01623;K01623;K01623	-	-	-
GH2	ncbi_113816889	tpi1b	78.74393481	36.23557864	1.119761873	0	0	tpi1b	triose-phosphate isomerase [Litopenaeus vannamei]	Metabolism;Metabolism;Metabolism;Metabolism;Metabolism;Metabolism	Global and overview maps;Global and overview maps;Carbohydrate metabolism;Global and overview maps;Carbohydrate metabolism;Carbohydrate metabolism	ko01100//Metabolic pathways;ko01200//Carbon metabolism;ko00010//Glycolysis / Gluconeogenesis;ko01230//Biosynthesis of amino acids;ko00562//Inositol phosphate metabolism;ko00051//Fructose and mannose metabolism	K01803;K01803;K01803;K01803;K01803;K01803	-	-	-
GH2	ncbi_113827090	PPO3	9.682194756	4.595943868	1.074972936	0	0	PPO3	prophenoloxidase-1 [Litopenaeus vannamei]	-	-	-	-	-	-	-
GH2	ncbi_113813598	ncbi_113813598	574.9644018	289.9306935	0.987764564	0	0	--	single IB domain protein [Litopenaeus vannamei]	-	-	-	-	-	-	-
GH2	ncbi_113826499	Mmel1	4.500340329	2.094259223	1.103594079	6.54E-294	1.75E-289	Mmel1	PREDICTED: neprilysin-like isoform X1 [Hyalella azteca]	-	-	-	-	-	-	-
GH2	ncbi_113826825	ncbi_113826825	4.516760792	1.920144823	1.234073383	3.77E-293	1.01E-288	--	-	-	-	-	-	-	-	-
GH2	ncbi_113823273	Tmprss2	1.381566609	0.467432301	1.563475783	8.68E-293	2.32E-288	Tmprss2	serine proteinase [Fenneropenaeus chinensis]	-	-	-	-	-	-	-
GH2	ncbi_113826664	ncbi_113826664	1.335207206	0.484220657	1.463327116	4.04E-292	1.08E-287	--	-	-	-	-	-	-	-	-
GH2	ncbi_113803037	ncbi_113803037	0.942223079	0.280007279	1.750604338	5.39E-292	1.44E-287	--	-	-	-	-	-	-	-	-
GH2	ncbi_113809104	ncbi_113809104	5.508874952	3.127008585	0.816974535	4.94E-268	1.32E-263	--	hypothetical protein TTHERM_01000170 [Tetrahymena thermophila SB210]	-	-	-	-	-	-	-
GH2	ncbi_113804858	ncbi_113804858	0.86229545	0.279394005	1.625881202	8.70E-267	2.33E-262	--	-	-	-	-	-	-	-	-
GH2	ncbi_113802412	ncbi_113802412	2.636115064	1.166034015	1.17680347	1.92E-265	5.15E-261	--	PREDICTED: protein scylla-like [Hyalella azteca]	-	-	-	-	-	-	-
GH2	ncbi_113802490	PPAF2	2.981634419	1.202373021	1.310218835	8.83E-265	2.36E-260	PPAF2	serine protease-like protein 3 [Penaeus monodon]	-	-	-	-	-	-	-
GH2	ncbi_113815917	Ces2a	1.202746463	0.394076837	1.609783697	4.88E-264	1.31E-259	Ces2a	juvenile hormone esterase-like carboxylesterase 1 [Eriocheir sinensis]	-	-	-	-	-	-	-
GH2	ncbi_113800677	ncbi_113800677	2.318021571	1.035285576	1.162865212	6.87E-237	1.84E-232	--	-	-	-	-	-	-	-	-
GH2	ncbi_113807706	MP1	2.934174274	1.342917319	1.127584078	1.57E-235	4.21E-231	MP1	clip domain serine proteinase 1 [Portunus trituberculatus]	-	-	-	-	-	-	-
GH2	ncbi_113820475	ncbi_113820475	0.692938254	0.220619151	1.65116877	5.28E-228	1.41E-223	--	PREDICTED: protein spinster homolog 2-like [Hyalella azteca]	-	-	-	-	-	-	-
GH2	ncbi_113808602	ncbi_113808602	0.649517508	0.191531426	1.761787288	4.48E-227	1.20E-222	--	-	-	-	-	-	-	-	-
GH2	ncbi_113801793	ncbi_113801793	0.691560178	0.207848332	1.734323627	1.85E-219	4.94E-215	--	PREDICTED: kynurenine formamidase-like [Hyalella azteca]	-	-	-	-	-	-	-
GH2	ncbi_113823695	ncbi_113823695	2.668242502	0.864668392	1.625670934	1.23E-217	3.29E-213	--	hypothetical protein BRAFLDRAFT_69362 [Branchiostoma floridae]	-	-	-	-	-	-	-
GH2	ncbi_113804225	ncbi_113804225	1.209752799	0.477072246	1.342432614	8.74E-214	2.34E-209	--	PREDICTED: CKLF-like MARVEL transmembrane domain-containing protein 4 [Hyalella azteca]	-	-	-	-	-	-	-
GH2	ncbi_113807130	ncbi_113807130	0.648236779	0.171320779	1.919820733	6.77E-202	1.81E-197	--	PREDICTED: transforming growth factor-beta-induced protein ig-h3 [Bemisia tabaci]	-	-	-	-	-	-	-
GH2	ncbi_113804544	ncbi_113804544	1.67414025	0.783142261	1.096074085	1.02E-197	2.72E-193	--	PDGF/VEGF-related factor 1 [Eriocheir sinensis]	Human Diseases;Human Diseases;Cellular Processes;Human Diseases;Environmental Information Processing;Environmental Information Processing;Human Diseases;Human Diseases;Environmental Information Processing;Environmental Information Processing;Organismal Systems;Human Diseases;Environmental Information Processing;Human Diseases;Human Diseases;Human Diseases;Human Diseases;Human Diseases;Human Disea…	Cancers;Infectious diseases;Cellular community - eukaryotes;Cancers;Signal transduction;Signal transduction;Cardiovascular diseases;Cancers;Signal transduction;Signal transduction;Endocrine system;Infectious diseases;Signal transduction;Endocrine and metabolic diseases;Infectious diseases;Cancers;Cancers;Drug resistance;Immune diseases;Cancers;Signal transduction	ko05200//Pathways in cancer;ko05165//Human papillomavirus infection;ko04510//Focal adhesion;ko05205//Proteoglycans in cancer;ko04151//PI3K-Akt signaling pathway;ko04015//Rap1 signaling pathway;ko05418//Fluid shear stress and atherosclerosis;ko05206//MicroRNAs in cancer;ko04010//MAPK signaling pathway;ko04014//Ras signaling pathway;ko04926//Relaxin signaling pathway;ko05163//Human cytomegalovirus …	K05448;K05448;K05448;K05448;K05448;K05448;K05448;K05448;K05448;K05448;K05448;K05448;K05448;K05448;K05448;K05448;K05448;K05448;K05448;K05448;K05448	-	-	-
GH2	ncbi_113816345	Sgms1	2.374152762	1.090383812	1.122576718	5.02E-184	1.34E-179	Sgms1	PREDICTED: phosphatidylcholine:ceramide cholinephosphotransferase 2-like isoform X3 [Cephus cinctus]	Metabolism;Environmental Information Processing;Metabolism	Global and overview maps;Signal transduction;Lipid metabolism	ko01100//Metabolic pathways;ko04071//Sphingolipid signaling pathway;ko00600//Sphingolipid metabolism	K04714;K04714;K04714	-	-	-
GH2	ncbi_113830543	SLC12A2	1.708150701	0.721744577	1.242874994	4.34E-183	1.16E-178	SLC12A2	Na+/K+/2Cl- cotransporter protein [Marsupenaeus japonicus]	Organismal Systems;Human Diseases;Organismal Systems	Digestive system;Infectious diseases;Digestive system	ko04972//Pancreatic secretion;ko05110//Vibrio cholerae infection;ko04970//Salivary secretion	K10951;K10951;K10951	-	-	-
GH2	ncbi_113802513	Atp10d	2.621004924	1.179122881	1.152405989	1.92E-181	5.14E-177	Atp10d	Phospholipid-transporting ATPase VB [Daphnia magna]	-	-	-	-	-	-	-
GH2	ncbi_113810575	ncbi_113810575	6.323549352	3.174672242	0.994126904	3.80E-181	1.02E-176	--	protein spaetzle, partial [Cherax quadricarinatus]	Organismal Systems	Immune system	ko04624//Toll and Imd signaling pathway	K20694	-	-	-
GH2	ncbi_113806294	Glo1	34.51057041	7.614761483	2.180167567	3.83E-180	1.02E-175	Glo1	PREDICTED: lactoylglutathione lyase [Crassostrea gigas]	Metabolism	Carbohydrate metabolism	ko00620//Pyruvate metabolism	K01759	GO:0031988//membrane-bounded vesicle	GO:0016846//carbon-sulfur lyase activity;GO:0046914//transition metal ion binding	GO:0002573//myeloid leukocyte differentiation;GO:0006081//cellular aldehyde metabolic process;GO:0006355//regulation of transcription, DNA-templated;GO:0006790//sulfur compound metabolic process;GO:0042981//regulation of apoptotic process
GH2	ncbi_113818090	ttk	4.475612109	2.418903748	0.887731644	7.18E-178	1.92E-173	ttk	PREDICTED: protein bric-a-brac 1-like [Halyomorpha halys]	-	-	-	-	-	-	-
GH2	ncbi_113826735	ncbi_113826735	0.768415086	0.269255244	1.512911398	5.65E-161	1.51E-156	--	PREDICTED: uncharacterized protein LOC108676220 [Hyalella azteca]	-	-	-	-	-	-	-
GH2	ncbi_113829541	ADA	1.036673041	0.503197597	1.042764011	8.08E-146	2.16E-141	ADA	PREDICTED: adenosine deaminase-like [Hyalella azteca]	Metabolism;Metabolism;Human Diseases	Global and overview maps;Nucleotide metabolism;Immune diseases	ko01100//Metabolic pathways;ko00230//Purine metabolism;ko05340//Primary immunodeficiency	K01488;K01488;K01488	-	-	-
GH2	ncbi_113806268	Txnrd3	1.298342385	0.574417539	1.176499179	3.77E-142	1.01E-137	Txnrd3	PREDICTED: thioredoxin reductase 1, cytoplasmic-like [Hyalella azteca]	Human Diseases;Human Diseases;Metabolism	Cancers;Cancers;Metabolism of other amino acids	ko05200//Pathways in cancer;ko05225//Hepatocellular carcinoma;ko00450//Selenocompound metabolism	K22182;K22182;K22182	-	GO:0016667//oxidoreductase activity, acting on a sulfur group of donors	GO:0044699//single-organism process
GH2	ncbi_113819923	Pgi	1.774465788	0.879428551	1.012746484	1.15E-134	3.07E-130	Pgi	glucose-6-phosphate isomerase [Spodoptera exigua]	Metabolism;Metabolism;Metabolism;Metabolism;Metabolism;Metabolism	Global and overview maps;Global and overview maps;Carbohydrate metabolism;Carbohydrate metabolism;Carbohydrate metabolism;Carbohydrate metabolism	ko01100//Metabolic pathways;ko01200//Carbon metabolism;ko00010//Glycolysis / Gluconeogenesis;ko00520//Amino sugar and nucleotide sugar metabolism;ko00500//Starch and sucrose metabolism;ko00030//Pentose phosphate pathway	K01810;K01810;K01810;K01810;K01810;K01810	-	-	-
GH2	ncbi_113811598	ME1	0.825485635	0.266810918	1.629425408	2.87E-131	7.68E-127	ME1	PREDICTED: NADP-dependent malic enzyme-like isoform X1 [Hyalella azteca]	Metabolism;Metabolism;Organismal Systems;Metabolism	Global and overview maps;Global and overview maps;Endocrine system;Carbohydrate metabolism	ko01100//Metabolic pathways;ko01200//Carbon metabolism;ko03320//PPAR signaling pathway;ko00620//Pyruvate metabolism	K00029;K00029;K00029;K00029	-	-	-
GH2	ncbi_113822611	Rab3	0.903868896	0.314909175	1.521177738	1.17E-125	3.15E-121	Rab3	ras-related protein Rab-3-like protein [Sarcoptes scabiei]	-	-	-	-	-	-	-
GH2	ncbi_113802837	NINJ1	3.081187422	2.012333907	0.614616729	1.90E-113	5.08E-109	NINJ1	PREDICTED: ninjurin-1-like [Hyalella azteca]	-	-	-	-	-	-	-
GH2	ncbi_113799985	NPC1	1.022322306	0.374350161	1.449389824	6.03E-112	1.62E-107	NPC1	PREDICTED: Niemann-Pick C1 protein-like [Hyalella azteca]	Cellular Processes;Organismal Systems	Transport and catabolism;Digestive system	ko04142//Lysosome;ko04979//Cholesterol metabolism	K12385;K12385	-	-	-
GH2	ncbi_113803123	PGD	0.683389052	0.273764301	1.319772807	1.12E-107	2.99E-103	PGD	PREDICTED: 6-phosphogluconate dehydrogenase, decarboxylating isoform X1 [Strongylocentrotus purpuratus]	Metabolism;Metabolism;Metabolism;Metabolism	Global and overview maps;Global and overview maps;Metabolism of other amino acids;Carbohydrate metabolism	ko01100//Metabolic pathways;ko01200//Carbon metabolism;ko00480//Glutathione metabolism;ko00030//Pentose phosphate pathway	K00033;K00033;K00033;K00033	-	-	-
GH2	ncbi_113802157	PPP1R3C	0.621044901	0.241797527	1.360898088	1.09E-104	2.92E-100	PPP1R3C	PREDICTED: protein phosphatase 1 regulatory subunit 3B-like isoform X2 [Hyalella azteca]	Organismal Systems;Human Diseases	Endocrine system;Endocrine and metabolic diseases	ko04910//Insulin signaling pathway;ko04931//Insulin resistance	K07189;K07189	-	-	-
GH2	ncbi_113806076	TUBB4B	1.192111746	0.574083974	1.054185791	1.61E-104	4.32E-100	TUBB4B	beta-II tubulin [Homarus americanus]	Cellular Processes;Human Diseases;Cellular Processes	Transport and catabolism;Infectious diseases;Cellular community - eukaryotes	ko04145//Phagosome;ko05130//Pathogenic Escherichia coli infection;ko04540//Gap junction	K07375;K07375;K07375	GO:0015630//microtubule cytoskeleton;GO:0032991//macromolecular complex	GO:0005198//structural molecule activity;GO:0017111//nucleoside-triphosphatase activity;GO:0032550//purine ribonucleoside binding	GO:0043623//cellular protein complex assembly;GO:0044763//single-organism cellular process
GH2	ncbi_113807334	ncbi_113807334	2.749077916	1.641181352	0.74421313	4.80E-103	1.29E-98	--	PREDICTED: uncharacterized protein LOC108670255 [Hyalella azteca]	-	-	-	-	-	-	-
GH2	ncbi_113811649	PIM3	1.30775298	0.583768303	1.163622275	1.84E-101	4.94E-97	PIM3	PREDICTED: serine/threonine-protein kinase pim-3-like [Limulus polyphemus]	Human Diseases;Human Diseases;Human Diseases;Human Diseases;Environmental Information Processing	Cancers;Cancers;Endocrine and metabolic diseases;Cancers;Signal transduction	ko05200//Pathways in cancer;ko05206//MicroRNAs in cancer;ko04933//AGE-RAGE signaling pathway in diabetic complications;ko05221//Acute myeloid leukemia;ko04630//Jak-STAT signaling pathway	K04702;K04702;K04702;K04702;K04702	-	-	-
GH2	ncbi_113817579	drk	0.927805659	0.332030683	1.482506078	2.83E-100	7.59E-96	drk	Protein E(sev)2B [Zootermopsis nevadensis]	Human Diseases;Organismal Systems;Human Diseases;Cellular Processes;Human Diseases;Environmental Information Processing;Human Diseases;Human Diseases;Environmental Information Processing;Environmental Information Processing;Human Diseases;Environmental Information Processing;Human Diseases;Human Diseases;Environmental Information Processing;Organismal Systems;Human Diseases;Organismal Systems;Env…	Cancers;Environmental adaptation;Infectious diseases;Cellular community - eukaryotes;Cancers;Signal transduction;Cancers;Cancers;Signal transduction;Signal transduction;Cancers;Signal transduction;Substance dependence;Cancers;Signal transduction;Endocrine system;Cancers;Immune system;Signal transduction;Signal transduction;Cancers;Endocrine system;Infectious diseases;Cellular community - eukaryot…	ko05200//Pathways in cancer;ko04714//Thermogenesis;ko05165//Human papillomavirus infection;ko04510//Focal adhesion;ko05205//Proteoglycans in cancer;ko04151//PI3K-Akt signaling pathway;ko05225//Hepatocellular carcinoma;ko05231//Choline metabolism in cancer;ko04013//MAPK signaling pathway - fly;ko04150//mTOR signaling pathway;ko05206//MicroRNAs in cancer;ko04010//MAPK signaling pathway;ko05034//Alc…	K04364;K04364;K04364;K04364;K04364;K04364;K04364;K04364;K04364;K04364;K04364;K04364;K04364;K04364;K04364;K04364;K04364;K04364;K04364;K04364;K04364;K04364;K04364;K04364;K04364;K04364;K04364;K04364;K04364;K04364;K04364;K04364;K04364;K04364;K04364;K04364;K04364;K04364;K04364;K04364;K04364;K04364;K04364;K04364;K04364;K04364;K04364;K04364;K04364	-	-	-
GH2	ncbi_113808319	Erap1	1.710604443	0.924878944	0.887169742	1.82E-98	4.88E-94	Erap1	PREDICTED: endoplasmic reticulum aminopeptidase 1 isoform X2 [Copidosoma floridanum]	Organismal Systems	Endocrine system	ko04614//Renin-angiotensin system	K11141	-	-	-
GH2	ncbi_113826593	A2ML1	0.845329181	0.411816705	1.0375109	6.38E-98	1.71E-93	A2ML1	alpha 2 macroglobulin [Litopenaeus vannamei]	Organismal Systems	Immune system	ko04610//Complement and coagulation cascades	K03910	-	-	-
GH2	ncbi_113809714	ncbi_113809714	3.696696118	2.382086382	0.634010723	8.32E-94	2.23E-89	--	transcription factor ATF-b [Litopenaeus vannamei]	-	-	-	-	-	-	-
GH2	ncbi_113808654	PDE8B	0.953722684	0.426446718	1.161204337	3.06E-85	8.18E-81	PDE8B	PREDICTED: high affinity cAMP-specific and IBMX-insensitive 3',5'-cyclic phosphodiesterase 8B-like [Hyalella azteca]	Metabolism;Human Diseases;Human Diseases;Organismal Systems	Nucleotide metabolism;Endocrine and metabolic diseases;Substance dependence;Endocrine system	ko00230//Purine metabolism;ko04934//Cushing syndrome;ko05032//Morphine addiction;ko04927//Cortisol synthesis and secretion	K18437;K18437;K18437;K18437	-	GO:0016787//hydrolase activity	GO:0044707//single-multicellular organism process
GH2	ncbi_113820234	ncbi_113820234	1.379144263	0.790834026	0.802326525	5.41E-85	1.45E-80	--	Leucine-rich repeat and immunoglobulin-like domain containing-NOGO receptor-interacting protein 4 [Zootermopsis nevadensis]	-	-	-	-	-	-	-
GH2	ncbi_113811416	mthl1	0.821617087	0.420663149	0.965800744	4.83E-80	1.29E-75	mthl1	PREDICTED: G-protein coupled receptor Mth2-like isoform X2 [Hyalella azteca]	-	-	-	-	-	-	-
GH2	ncbi_113824294	MP1	0.969068273	0.569076715	0.767975159	1.06E-79	2.83E-75	MP1	serine protease 1 [Litopenaeus vannamei]	-	-	-	-	-	-	-
GH2	ncbi_113816132	Rgs2	0.939113169	0.687895434	0.449109742	2.85E-78	7.62E-74	Rgs2	PREDICTED: regulator of G-protein signaling 2-like [Hyalella azteca]	-	-	-	-	-	-	-
GH2	ncbi_113822389	ncbi_113822389	2.083908415	1.243394378	0.745007913	5.68E-64	1.52E-59	--	-	-	-	-	-	-	-	-
GH2	ncbi_113821079	Sh3beta	2.584634646	1.836944455	0.492652358	1.01E-61	2.71E-57	Sh3beta	PREDICTED: SH3 domain-binding glutamic acid-rich protein homolog isoform X2 [Hyalella azteca]	-	-	-	-	-	-	-
GH2	ncbi_113828272	ncbi_113828272	1.260394183	0.783313449	0.686213367	1.48E-59	3.98E-55	--	PREDICTED: uncharacterized protein LOC108676636 [Hyalella azteca]	-	-	-	-	-	-	-
GH2	ncbi_113830615	CHP1	0.943217491	0.48866156	0.948754851	1.30E-57	3.49E-53	CHP1	calcineurin B-like protein 1 [Gecarcinus lateralis]	-	-	-	-	-	-	-
GH2	ncbi_113829247	ncbi_113829247	4.235748267	3.218784135	0.396101025	1.42E-57	3.80E-53	--	PREDICTED: EF-hand domain-containing protein D2 homolog isoform X2 [Hyalella azteca]	-	-	-	-	-	-	-
GH2	ncbi_113800859	Inx2	5.700522815	3.252319256	0.809625357	2.50E-52	6.70E-48	Inx2	innexin 2 [Penaeus monodon]	-	-	-	-	GO:0005886//plasma membrane;GO:0005911//cell-cell junction;GO:0044425//membrane part	GO:0022829//wide pore channel activity	GO:0002009//morphogenesis of an epithelium;GO:0006810//transport;GO:0007635//chemosensory behavior;GO:0048135//female germ-line cyst formation
GH2	ncbi_113802238	ncbi_113802238	2.611438528	1.845076462	0.501164139	6.47E-51	1.73E-46	--	-	-	-	-	-	-	-	-
GH2	ncbi_113823673	PRDX6	2.075059306	1.142321391	0.861183962	3.19E-47	8.54E-43	PRDX6	peroxiredoxin 6 [Scylla paramamosain]	-	-	-	-	-	GO:0003824//catalytic activity;GO:0016209//antioxidant activity	GO:0044710//single-organism metabolic process
GH2	ncbi_113823266	MICALL2	1.565203033	0.901288883	0.79628831	2.58E-45	6.91E-41	MICALL2	PREDICTED: MICAL-like protein 1 [Tribolium castaneum]	-	-	-	-	-	-	-
GH2	ncbi_113818991	chn	1.356220107	0.917737324	0.563438151	3.19E-44	8.55E-40	chn	PREDICTED: zinc finger protein 628-like [Hyalella azteca]	-	-	-	-	-	-	-
GH2	ncbi_113817397	DNAJC7	0.947232081	0.580506114	0.706406681	9.96E-44	2.67E-39	DNAJC7	PREDICTED: dnaJ homolog subfamily C member 7-like isoform X3 [Hyalella azteca]	-	-	-	-	-	-	-
GH2	ncbi_113823675	PRDX6	1.233309374	0.621801455	0.988008846	1.93E-40	5.18E-36	PRDX6	peroxiredoxin 6 [Scylla paramamosain]	-	-	-	-	-	GO:0003824//catalytic activity;GO:0016209//antioxidant activity	GO:0044710//single-organism metabolic process
GH2	ncbi_113830391	tgo	1.701052963	1.158154186	0.554600728	9.55E-39	2.56E-34	tgo	hypoxia inducible factor 1 beta [Litopenaeus vannamei]	Human Diseases;Human Diseases;Environmental Information Processing;Human Diseases;Human Diseases	Cancers;Endocrine and metabolic diseases;Signal transduction;Cancers;Cancers	ko05200//Pathways in cancer;ko04934//Cushing syndrome;ko04066//HIF-1 signaling pathway;ko05204//Chemical carcinogenesis;ko05211//Renal cell carcinoma	K09097;K09097;K09097;K09097;K09097	GO:0044424//intracellular part	-	GO:0010467//gene expression;GO:0034645//cellular macromolecule biosynthetic process;GO:0050794//regulation of cellular process
GH2	ncbi_113811550	ncbi_113811550	1.216595803	0.84000813	0.534374737	1.43E-37	3.83E-33	--	PREDICTED: uncharacterized protein LOC108677823 isoform X2 [Hyalella azteca]	-	-	-	-	-	-	-
GH2	ncbi_113830416	Tstd3	0.737061925	0.534221298	0.464348341	3.03E-36	8.11E-32	Tstd3	rhodanese 1-like protein [Macrobrachium nipponense]	-	-	-	-	-	-	-
GH2	ncbi_113825364	Orct2	1.144433123	0.734284525	0.640222057	3.05E-34	8.18E-30	Orct2	PREDICTED: organic cation transporter protein-like [Hyalella azteca]	-	-	-	-	-	-	-
GH2	ncbi_113802666	Smpd2	0.812400363	0.42840185	0.923226175	1.21E-31	3.24E-27	Smpd2	putative neutral sphingomyelinase [Orchesella cincta]	Metabolism;Environmental Information Processing;Metabolism	Global and overview maps;Signal transduction;Lipid metabolism	ko01100//Metabolic pathways;ko04071//Sphingolipid signaling pathway;ko00600//Sphingolipid metabolism	K12351;K12351;K12351	-	-	-
GH2	ncbi_113803426	RAB8B	1.04346133	0.680363887	0.616998665	1.68E-31	4.50E-27	RAB8B	PREDICTED: ras-related protein Rab-8B-like isoform X1 [Cyprinus carpio]	Cellular Processes	Cellular community - eukaryotes	ko04530//Tight junction	K07902	-	-	-
GH2	ncbi_113813970	ncbi_113813970	1.229812024	0.956960588	0.361906403	7.90E-31	2.12E-26	--	PREDICTED: chymotrypsin-like protease CTRL-1 isoform X1 [Hyalella azteca]	-	-	-	-	-	-	-
GH2	ncbi_113806288	SERPINB1	1.296374405	0.95356716	0.443075986	4.30E-27	1.15E-22	SERPINB1	serine proteinase inhibitor 7 [Litopenaeus vannamei]	Human Diseases	Infectious diseases	ko05146//Amoebiasis	K13963	-	-	-
GH2	ncbi_113816599	TBC1D1	1.24789939	0.839409623	0.572054715	5.32E-27	1.43E-22	TBC1D1	PREDICTED: TBC1 domain family member 4-like [Limulus polyphemus]	Organismal Systems;Human Diseases	Endocrine system;Endocrine and metabolic diseases	ko04919//Thyroid hormone signaling pathway;ko04931//Insulin resistance	K17902;K17902	-	-	-
GH2	ncbi_113809588	SLC31A1	0.650481897	0.414544715	0.649981181	5.05E-26	1.35E-21	SLC31A1	PREDICTED: high affinity copper uptake protein 1 isoform X1 [Polistes canadensis]	Human Diseases;Organismal Systems	Drug resistance;Digestive system	ko01524//Platinum drug resistance;ko04978//Mineral absorption	K14686;K14686	-	-	-
GH2	ncbi_113810916	ncbi_113810916	0.70811916	0.509149457	0.47590294	2.19E-24	5.85E-20	--	PREDICTED: delta(7)-sterol 5(6)-desaturase erg32-like isoform X1 [Hyalella azteca]	-	-	-	-	-	-	-
GH2	ncbi_113802843	ncbi_113802843	1.482073104	1.126880815	0.395281674	6.88E-23	1.84E-18	--	PREDICTED: bcl-2-like protein 1 [Hyalella azteca]	Human Diseases;Environmental Information Processing;Human Diseases;Cellular Processes;Human Diseases;Human Diseases;Environmental Information Processing;Cellular Processes;Human Diseases;Human Diseases;Organismal Systems;Human Diseases;Cellular Processes;Human Diseases;Environmental Information Processing;Human Diseases;Human Diseases;Cellular Processes;Human Diseases;Cellular Processes;Environme…	Cancers;Signal transduction;Cancers;Cell growth and death;Infectious diseases;Cancers;Signal transduction;Transport and catabolism;Drug resistance;Infectious diseases;Immune system;Cancers;Cell growth and death;Cancers;Signal transduction;Cancers;Drug resistance;Transport and catabolism;Neurodegenerative diseases;Cell growth and death;Signal transduction	ko05200//Pathways in cancer;ko04151//PI3K-Akt signaling pathway;ko05225//Hepatocellular carcinoma;ko04210//Apoptosis;ko05166//HTLV-I infection;ko05202//Transcriptional misregulation in cancers;ko04014//Ras signaling pathway;ko04140//Autophagy - animal;ko01524//Platinum drug resistance;ko05145//Toxoplasmosis;ko04621//NOD-like receptor signaling pathway;ko05222//Small cell lung cancer;ko04215//Apop…	K04570;K04570;K04570;K04570;K04570;K04570;K04570;K04570;K04570;K04570;K04570;K04570;K04570;K04570;K04570;K04570;K04570;K04570;K04570;K04570;K04570	-	-	-
GH2	ncbi_113812037	ncbi_113812037	0.543561598	0.386036882	0.493704846	1.64E-22	4.39E-18	--	PREDICTED: SCO-spondin-like [Branchiostoma belcheri]	-	-	-	-	GO:0016020//membrane	GO:0005515//protein binding	GO:0050789//regulation of biological process
GH2	ncbi_113801198	mapk1	2.072138681	1.408363478	0.557100841	6.28E-22	1.68E-17	mapk1	mitogen-activated protein kinase [Marsupenaeus japonicus]	Human Diseases;Human Diseases;Cellular Processes;Human Diseases;Environmental Information Processing;Human Diseases;Cellular Processes;Organismal Systems;Cellular Processes;Environmental Information Processing;Organismal Systems;Human Diseases;Environmental Information Processing;Human Diseases;Cellular Processes;Organismal Systems;Environmental Information Processing;Human Diseases;Human Disease…	Cancers;Infectious diseases;Cellular community - eukaryotes;Cancers;Signal transduction;Cancers;Cell motility;Endocrine system;Cell growth and death;Signal transduction;Immune system;Cancers;Signal transduction;Infectious diseases;Cellular community - eukaryotes;Endocrine system;Signal transduction;Infectious diseases;Cancers;Infectious diseases;Signal transduction;Neurodegenerative diseases;Subs…	ko05200//Pathways in cancer;ko05165//Human papillomavirus infection;ko04510//Focal adhesion;ko05205//Proteoglycans in cancer;ko04151//PI3K-Akt signaling pathway;ko05225//Hepatocellular carcinoma;ko04810//Regulation of actin cytoskeleton;ko04919//Thyroid hormone signaling pathway;ko04210//Apoptosis;ko04015//Rap1 signaling pathway;ko04611//Platelet activation;ko05231//Choline metabolism in cancer;k…	K04371;K04371;K04371;K04371;K04371;K04371;K04371;K04371;K04371;K04371;K04371;K04371;K04371;K04371;K04371;K04371;K04371;K04371;K04371;K04371;K04371;K04371;K04371;K04371;K04371;K04371;K04371;K04371;K04371;K04371;K04371;K04371;K04371;K04371;K04371;K04371;K04371;K04371;K04371;K04371;K04371;K04371;K04371;K04371;K04371;K04371;K04371;K04371;K04371;K04371;K04371;K04371;K04371;K04371;K04371;K04371;K04371;…	-	-	-
GH2	ncbi_113810834	ncbi_113810834	0.738898353	0.376020935	0.974562925	2.35E-21	6.29E-17	--	-	-	-	-	-	-	-	-
GH2	ncbi_113824350	BTG1	1.12828141	0.808384743	0.481012943	8.78E-20	2.35E-15	BTG1	BTG1-like protein [Coptotermes formosanus]	Genetic Information Processing	Folding, sorting and degradation	ko03018//RNA degradation	K14443	-	-	-
GH2	ncbi_113803882	ogfod2	0.584852491	0.444236127	0.396746076	4.79E-16	1.28E-11	ogfod2	PREDICTED: 2-oxoglutarate and iron-dependent oxygenase domain-containing protein 2-like [Lingula anatina]	-	-	-	-	-	GO:0016491//oxidoreductase activity	-
GH2	ncbi_113816684	GPx	3.374221888	2.626017442	0.361678349	1.26E-14	3.37E-10	GPx	Glutathione peroxidase 6 [Zootermopsis nevadensis]	Human Diseases;Metabolism;Organismal Systems;Metabolism;Human Diseases	Neurodegenerative diseases;Metabolism of other amino acids;Endocrine system;Lipid metabolism;Neurodegenerative diseases	ko05016//Huntington disease;ko00480//Glutathione metabolism;ko04918//Thyroid hormone synthesis;ko00590//Arachidonic acid metabolism;ko05014//Amyotrophic lateral sclerosis (ALS)	K00432;K00432;K00432;K00432;K00432	-	GO:0016491//oxidoreductase activity	-
GH2	ncbi_113820463	ItgaPS4	2.341045934	1.71762292	0.446739895	1.01E-13	2.71E-09	ItgaPS4	integrin alpha 4, partial [Fenneropenaeus chinensis]	Human Diseases;Cellular Processes;Environmental Information Processing;Cellular Processes;Human Diseases;Human Diseases;Organismal Systems;Human Diseases;Environmental Information Processing;Organismal Systems;Environmental Information Processing;Human Diseases;Organismal Systems	Infectious diseases;Cellular community - eukaryotes;Signal transduction;Cell motility;Cardiovascular diseases;Cardiovascular diseases;Immune system;Cardiovascular diseases;Signaling molecules and interaction;Immune system;Signaling molecules and interaction;Infectious diseases;Immune system	ko05165//Human papillomavirus infection;ko04510//Focal adhesion;ko04151//PI3K-Akt signaling pathway;ko04810//Regulation of actin cytoskeleton;ko05410//Hypertrophic cardiomyopathy (HCM);ko05414//Dilated cardiomyopathy (DCM);ko04670//Leukocyte transendothelial migration;ko05412//Arrhythmogenic right ventricular cardiomyopathy (ARVC);ko04512//ECM-receptor interaction;ko04640//Hematopoietic cell line…	K06483;K06483;K06483;K06483;K06483;K06483;K06483;K06483;K06483;K06483;K06483;K06483;K06483	-	-	-
GH2	ncbi_113813488	ncbi_113813488	0.672176195	0.505897224	0.409995128	5.76E-13	1.54E-08	--	-	-	-	-	-	-	-	-
GH2	ncbi_113803340	MKL2	0.838327523	0.591482297	0.503179006	2.27E-12	6.08E-08	MKL2	PREDICTED: MKL/myocardin-like protein 1 isoform X3 [Polistes canadensis]	-	-	-	-	-	-	-
GH2	ncbi_113826740	Cltc	1.066580205	0.72609044	0.554771294	4.51E-12	1.21E-07	Cltc	clathrin [Marsupenaeus japonicus]	Cellular Processes;Human Diseases;Cellular Processes;Human Diseases;Organismal Systems;Organismal Systems	Transport and catabolism;Neurodegenerative diseases;Transport and catabolism;Infectious diseases;Nervous system;Excretory system	ko04142//Lysosome;ko05016//Huntington disease;ko04144//Endocytosis;ko05100//Bacterial invasion of epithelial cells;ko04721//Synaptic vesicle cycle;ko04961//Endocrine and other factor-regulated calcium reabsorption	K04646;K04646;K04646;K04646;K04646;K04646	GO:0030125//clathrin vesicle coat	-	GO:0015031//protein transport
GH2	ncbi_113809784	ncbi_113809784	1.032146787	0.793659262	0.3790565	1.07E-11	2.88E-07	--	-	-	-	-	-	-	-	-
GH2	ncbi_113813158	Flo1	1.050018788	0.74357043	0.497873837	2.75E-11	7.37E-07	Flo1	flotillin-1 [Scylla paramamosain]	Organismal Systems	Endocrine system	ko04910//Insulin signaling pathway	K07192	-	-	-
GH2	ncbi_113817244	Dst	0.847574179	0.552448056	0.617500817	2.79E-10	7.47E-06	Dst	PREDICTED: dystonin-like isoform X2 [Hyalella azteca]	-	-	-	-	-	-	-
GH2	ncbi_113799911	ANKFN1	0.731916249	0.512427046	0.514331952	0.000846694	1	ANKFN1	PREDICTED: ankyrin repeat and fibronectin type-III domain-containing protein 1-like isoform X2 [Hyalella azteca]	-	-	-	-	-	-	-
GH2	ncbi_113814557	Ptprt	1.262741047	0.946323629	0.416153259	0.004444333	1	Ptprt	PREDICTED: receptor-type tyrosine-protein phosphatase alpha-like [Hyalella azteca]	Cellular Processes;Organismal Systems;Human Diseases;Environmental Information Processing	Cellular community - eukaryotes;Endocrine system;Endocrine and metabolic diseases;Signaling molecules and interaction	ko04520//Adherens junction;ko04910//Insulin signaling pathway;ko04931//Insulin resistance;ko04514//Cell adhesion molecules (CAMs)	K05695;K05695;K05695;K05695	-	-	-
GH2	ncbi_113821163	loco	0.646342829	0.465831972	0.472489934	0.007914788	1	loco	PREDICTED: regulator of G-protein signaling loco-like [Limulus polyphemus]	-	-	-	-	-	-	GO:0050789//regulation of biological process
