# Supplementary material for: Single-cell RNA sequencing analysis of shrimp immune cells identifies macrophage-like phagocytes
Source: eLife. 2022 Oct 6;11:e80127. doi: 10.7554/eLife.80127 (PMC9584607; doi:10.7554/eLife.80127)
Supplement: Supplementary file 5. [file elife-80127-supp5.csv]

Target_Cluster	Gene ID	Gene Name	Target_Cluster_mean	Other_Cluster_mean	Log2FC	Pvalue	Qvalue	Symbol	Description	KEGG_A_class	KEGG_B_class	Pathway	K_ID	GO Component	GO Function	GO Process
7	ncbi_113804729	Angpt4	9.645832361	0.029704969	8.343057663	0	0	Angpt4	PREDICTED: microfibril-associated glycoprotein 4-like [Clupea harengus]	-	-	-	-	-	-	-
7	ncbi_113826144	ncbi_113826144	0.864661576	0.008366422	6.691380917	0	0	--	PREDICTED: receptor-type tyrosine-protein phosphatase S-like, partial [Amphimedon queenslandica]	-	-	-	-	-	-	-
7	ncbi_113812270	ncbi_113812270	3.494016797	0.040579176	6.428003176	0	0	--	-	-	-	-	-	-	-	-
7	ncbi_113823074	ncbi_113823074	373.3390658	4.608552155	6.340029091	0	0	--	-	-	-	-	-	-	-	-
7	ncbi_113820510	ALF	31.6834629	0.402274423	6.299406204	0	0	ALF	antilipopolysaccharide factor isoform 4 [Fenneropenaeus chinensis]	-	-	-	-	-	-	-
7	ncbi_113815644	ITGA2B	3.369337622	0.054170653	5.9588097	0	0	ITGA2B	integrin alpha 5 [Fenneropenaeus chinensis]	-	-	-	-	-	-	-
7	ncbi_113810024	ncbi_113810024	2.360884447	0.042813933	5.785103248	0	0	--	chitin binding-like protein [Fenneropenaeus chinensis]	-	-	-	-	-	-	-
7	ncbi_113822241	CHIT1	12.47332221	0.255646091	5.608553996	0	0	CHIT1	chitinase 5 [Litopenaeus vannamei]	Metabolism;Metabolism	Global and overview maps;Carbohydrate metabolism	ko01100//Metabolic pathways;ko00520//Amino sugar and nucleotide sugar metabolism	K01183;K01183	-	-	-
7	ncbi_113812492	chic	1.231598411	0.026565158	5.534852791	0	0	chic	chicadae/profilin [Litopenaeus vannamei]	Cellular Processes;Environmental Information Processing;Environmental Information Processing;Human Diseases;Human Diseases	Cell motility;Signal transduction;Signal transduction;Infectious diseases;Infectious diseases	ko04810//Regulation of actin cytoskeleton;ko04015//Rap1 signaling pathway;ko04013//MAPK signaling pathway - fly;ko05131//Shigellosis;ko05132//Salmonella infection	K05759;K05759;K05759;K05759;K05759	-	-	-
7	ncbi_113811918	ncbi_113811918	13.9053172	0.346117806	5.328229682	0	0	--	PREDICTED: galactose-specific lectin nattectin-like [Hyalella azteca]	-	-	-	-	-	-	-
7	ncbi_113810108	ncbi_113810108	24.53345741	0.628213465	5.287351885	0	0	--	anti-lipopolysaccharide factor isoform 6 [Penaeus monodon]	-	-	-	-	-	-	-
7	ncbi_113813946	ncbi_113813946	6.398564774	0.178079969	5.167151184	0	0	--	chitin binding-like protein [Fenneropenaeus chinensis]	-	-	-	-	-	-	-
7	ncbi_113810025	ncbi_113810025	0.508459333	0.014412836	5.140706246	0	0	--	PREDICTED: beta-2 adrenergic receptor-like [Neolamprologus brichardi]	-	-	-	-	-	-	-
7	ncbi_113800918	fax	38.71927831	1.295351354	4.901636686	0	0	fax	PREDICTED: failed axon connections-like isoform X1 [Hyalella azteca]	-	-	-	-	-	-	-
7	ncbi_113829328	GGH	5.746429418	0.204147115	4.814984719	0	0	GGH	PREDICTED: gamma-glutamyl hydrolase-like isoform X1 [Limulus polyphemus]	Metabolism;Human Diseases	Metabolism of cofactors and vitamins;Drug resistance	ko00790//Folate biosynthesis;ko01523//Antifolate resistance	K01307;K01307	-	-	-
7	ncbi_113802295	Lyz1	253.3051947	9.453512008	4.743882459	0	0	Lyz1	lysozyme [Litopenaeus vannamei]	Organismal Systems	Digestive system	ko04970//Salivary secretion	K13915	-	-	-
7	ncbi_113823443	LIPF	0.620980464	0.023556927	4.720324613	0	0	LIPF	lipase 3 [Culex quinquefasciatus]	Cellular Processes;Organismal Systems;Metabolism	Transport and catabolism;Digestive system;Lipid metabolism	ko04142//Lysosome;ko04979//Cholesterol metabolism;ko00100//Steroid biosynthesis	K01052;K01052;K01052	-	-	-
7	ncbi_113824360	Tl	1.621883583	0.066279123	4.612971934	0	0	Tl	toll2 [Litopenaeus vannamei]	Organismal Systems	Immune system	ko04624//Toll and Imd signaling pathway	K18809	-	-	-
7	ncbi_113806935	ncbi_113806935	5.968055943	0.253071936	4.559641621	0	0	--	PREDICTED: LOW QUALITY PROTEIN: CD109 antigen-like [Galendromus occidentalis]	-	-	-	-	-	-	-
7	ncbi_113812219	ncbi_113812219	0.639821622	0.029449881	4.441336045	0	0	--	C-type lectin 3, partial [Marsupenaeus japonicus]	-	-	-	-	-	-	-
7	ncbi_113823707	ncbi_113823707	8.425329931	0.400169324	4.396050698	0	0	--	-	-	-	-	-	-	-	-
7	ncbi_113825861	ncbi_113825861	2.026367927	0.098620136	4.360870096	0	0	--	fibrinogen-related protein 1 isoform 5 [Litopenaeus vannamei]	-	-	-	-	-	-	-
7	ncbi_113827868	LGMN	1.809420425	0.089490708	4.337645965	0	0	LGMN	PREDICTED: legumain-like [Lingula anatina]	Cellular Processes;Organismal Systems	Transport and catabolism;Immune system	ko04142//Lysosome;ko04612//Antigen processing and presentation	K01369;K01369	-	-	-
7	ncbi_113800836	ncbi_113800836	1.405405094	0.07120639	4.302835505	0	0	--	PREDICTED: sialin-like [Bombyx mori]	Cellular Processes	Transport and catabolism	ko04142//Lysosome	K12301	-	-	-
7	ncbi_113818495	ncbi_113818495	1.615008311	0.084611236	4.254548519	0	0	--	PREDICTED: C-type lectin domain family 4 member M-like [Hyalella azteca]	-	-	-	-	-	-	-
7	ncbi_113828560	Nlrp3	7.026167271	0.386984094	4.182391747	0	0	Nlrp3	PREDICTED: NLR family CARD domain-containing protein 4-like [Lingula anatina]	-	-	-	-	-	-	-
7	ncbi_113826852	ncbi_113826852	2.885845568	0.169971692	4.0856277	0	0	--	PREDICTED: uncharacterized protein LOC108669804 [Hyalella azteca]	-	-	-	-	-	-	-
7	ncbi_113823075	ncbi_113823075	128.5230287	7.810299315	4.040505236	0	0	--	C-type lectin 2 [Marsupenaeus japonicus]	-	-	-	-	-	-	-
7	ncbi_113802813	ncbi_113802813	0.799776694	0.049894295	4.002650482	0	0	--	Adenylate cyclase [Daphnia magna]	-	-	-	-	-	-	-
7	ncbi_113810366	NAGA	0.883350446	0.055854626	3.983237214	0	0	NAGA	Alpha-N-acetylgalactosaminidase [Harpegnathos saltator]	Metabolism;Cellular Processes;Metabolism	Global and overview maps;Transport and catabolism;Glycan biosynthesis and metabolism	ko01100//Metabolic pathways;ko04142//Lysosome;ko00603//Glycosphingolipid biosynthesis - globo and isoglobo series	K01204;K01204;K01204	-	-	-
7	ncbi_113829941	ncbi_113829941	0.470385334	0.030569874	3.943660588	0	0	--	-	-	-	-	-	-	-	-
7	ncbi_113827405	ncbi_113827405	1.53533279	0.101441461	3.919832065	0	0	--	PREDICTED: thiosulfate sulfurtransferase/rhodanese-like domain-containing protein 3 isoform X1 [Hyalella azteca]	-	-	-	-	-	-	-
7	ncbi_113803502	ncbi_113803502	38.27454352	2.631250443	3.862564695	0	0	--	-	-	-	-	-	-	-	-
7	ncbi_113823866	MEGF11	1.016791248	0.070301682	3.854320503	0	0	MEGF11	PREDICTED: multiple epidermal growth factor-like domains protein 11 [Hyalella azteca]	-	-	-	-	-	-	-
7	ncbi_113817215	ncbi_113817215	0.645524702	0.045223818	3.835317609	0	0	--	PREDICTED: lachesin-like [Hyalella azteca]	-	-	-	-	-	-	-
7	ncbi_113815885	ncbi_113815885	1.171489641	0.083536799	3.809788518	0	0	--	Transcription factor Sox-11-A [Zootermopsis nevadensis]	Human Diseases	Cancers	ko05206//MicroRNAs in cancer	K09268	-	-	-
7	ncbi_113803783	ncbi_113803783	167.3568311	12.99787362	3.686579909	0	0	--	-	-	-	-	-	-	-	-
7	ncbi_113816639	ncbi_113816639	5.464681452	0.468271511	3.544720228	0	0	--	-	-	-	-	-	-	-	-
7	ncbi_113800266	ncbi_113800266	0.753836643	0.067744657	3.476072848	0	0	--	PREDICTED: tumor protein p53-inducible protein 11-like [Limulus polyphemus]	-	-	-	-	-	-	-
7	ncbi_113807833	PRDX5	13.34075333	1.283644816	3.377522166	0	0	PRDX5	peroxiredoxin-5 [Palaemon carinicauda]	Cellular Processes	Transport and catabolism	ko04146//Peroxisome	K11187	-	-	-
7	ncbi_113810290	ncbi_113810290	4.101660114	0.402811794	3.348030116	0	0	--	-	-	-	-	-	-	-	-
7	ncbi_113809589	Ras64B	1.144728841	0.112638976	3.345227875	0	0	Ras64B	Ras protein [Marsupenaeus japonicus]	Human Diseases;Cellular Processes;Human Diseases;Environmental Information Processing;Environmental Information Processing;Environmental Information Processing;Cellular Processes;Cellular Processes;Environmental Information Processing;Environmental Information Processing;Organismal Systems;Cellular Processes	Cancers;Cell motility;Infectious diseases;Signal transduction;Signal transduction;Signal transduction;Transport and catabolism;Cell growth and death;Signal transduction;Signal transduction;Immune system;Transport and catabolism	ko05205//Proteoglycans in cancer;ko04810//Regulation of actin cytoskeleton;ko05166//HTLV-I infection;ko04010//MAPK signaling pathway;ko04024//cAMP signaling pathway;ko04014//Ras signaling pathway;ko04140//Autophagy - animal;ko04218//Cellular senescence;ko04072//Phospholipase D signaling pathway;ko04371//Apelin signaling pathway;ko04625//C-type lectin receptor signaling pathway;ko04137//Mitophagy …	K07830;K07830;K07830;K07830;K07830;K07830;K07830;K07830;K07830;K07830;K07830;K07830	-	-	-
7	ncbi_113810214	ncbi_113810214	22.14644267	2.339805717	3.242614333	0	0	--	-	-	-	-	-	-	-	-
7	ncbi_113803496	ncbi_113803496	1.087678021	0.11645802	3.223369643	0	0	--	-	-	-	-	-	-	-	-
7	ncbi_113800234	Casp1	0.909558283	0.098791335	3.202709678	0	0	Casp1	PREDICTED: caspase-1 [Monomorium pharaonis]	Cellular Processes;Cellular Processes	Cell growth and death;Cell growth and death	ko04214//Apoptosis - fly;ko04215//Apoptosis - multiple species	K20009;K20009	-	-	-
7	ncbi_113830025	ncbi_113830025	2.244915812	0.244537083	3.198536174	0	0	--	-	-	-	-	-	-	-	-
7	ncbi_113813528	ncbi_113813528	2.00741495	0.292929371	2.776714107	0	0	--	-	-	-	-	-	-	-	-
7	ncbi_113807065	sdn-1	40.3416783	6.665683086	2.597446472	0	0	sdn-1	syndecan precursor [Litopenaeus vannamei]	Human Diseases;Human Diseases;Environmental Information Processing;Human Diseases	Cancers;Cardiovascular diseases;Signaling molecules and interaction;Infectious diseases	ko05205//Proteoglycans in cancer;ko05418//Fluid shear stress and atherosclerosis;ko04514//Cell adhesion molecules (CAMs);ko05144//Malaria	K16336;K16336;K16336;K16336	-	-	-
7	ncbi_113803354	Cd63	14.63651849	2.910266851	2.330349079	0	0	Cd63	tetraspanins-like protein CD63 [Litopenaeus vannamei]	Human Diseases;Cellular Processes	Cancers;Transport and catabolism	ko05205//Proteoglycans in cancer;ko04142//Lysosome	K06497;K06497	-	-	-
7	ncbi_113805784	ncbi_113805784	45.72848789	12.60357563	1.85926013	0	0	--	hypothetical protein [Scylla paramamosain]	-	-	-	-	-	-	-
7	ncbi_113807532	DFR	12.85954247	2.664240379	2.271043154	6.34E-307	1.70E-302	DFR	PREDICTED: cinnamoyl-CoA reductase 2-like [Parasteatoda tepidariorum]	-	-	-	-	-	-	-
7	ncbi_113805558	reep6	9.636001173	1.709317088	2.495014519	5.00E-294	1.34E-289	reep6	receptor accessory protein 5 [Procambarus clarkii]	-	-	-	-	-	-	-
7	ncbi_113824903	zfh1	0.566563353	0.050024649	3.501526253	8.40E-291	2.25E-286	zfh1	PREDICTED: zinc finger protein 1 isoform X2 [Aethina tumida]	Human Diseases;Human Diseases;Human Diseases	Cancers;Cancers;Cancers	ko05202//Transcriptional misregulation in cancers;ko05206//MicroRNAs in cancer;ko05215//Prostate cancer	K09299;K09299;K09299	-	-	-
7	ncbi_113812626	CIB1	1.038439449	0.253617011	2.033693673	3.84E-285	1.03E-280	CIB1	PREDICTED: calcium and integrin-binding protein 1-like [Branchiostoma belcheri]	-	-	-	-	-	-	-
7	ncbi_113800211	Clca4a	0.834090414	0.09010737	3.210486759	7.08E-277	1.90E-272	Clca4a	Calcium-activated chloride channel regulator 2 [Daphnia magna]	Organismal Systems;Organismal Systems	Digestive system;Endocrine system	ko04972//Pancreatic secretion;ko04924//Renin secretion	K05030;K05030	-	-	-
7	ncbi_113822871	ncbi_113822871	17.17331143	4.846647842	1.825109088	1.14E-276	3.06E-272	--	PREDICTED: adenylate cyclase type 8-like isoform X7 [Apis dorsata]	-	-	-	-	-	-	-
7	ncbi_113813552	ncbi_113813552	36.83950214	14.72366059	1.323117166	7.20E-263	1.93E-258	--	-	-	-	-	-	-	-	-
7	ncbi_113803894	Gs2	0.841903044	0.071841046	3.550773835	1.01E-261	2.71E-257	Gs2	glutamine synthetase [Penaeus monodon]	Metabolism;Cellular Processes;Metabolism;Organismal Systems;Organismal Systems;Metabolism;Metabolism;Metabolism;Metabolism	Global and overview maps;Cell growth and death;Global and overview maps;Nervous system;Nervous system;Carbohydrate metabolism;Amino acid metabolism;Amino acid metabolism;Energy metabolism	ko01100//Metabolic pathways;ko04217//Necroptosis;ko01230//Biosynthesis of amino acids;ko04724//Glutamatergic synapse;ko04727//GABAergic synapse;ko00630//Glyoxylate and dicarboxylate metabolism;ko00250//Alanine, aspartate and glutamate metabolism;ko00220//Arginine biosynthesis;ko00910//Nitrogen metabolism	K01915;K01915;K01915;K01915;K01915;K01915;K01915;K01915;K01915	-	-	-
7	ncbi_113824440	Ttf2	1.761054737	0.125775257	3.807519713	4.79E-259	1.28E-254	Ttf2	PREDICTED: transcription termination factor 2-like [Hyalella azteca]	Organismal Systems	Endocrine system	ko04918//Thyroid hormone synthesis	K15173	-	-	-
7	ncbi_113822630	TUB-2	2.34132187	0.462052671	2.341194057	1.68E-254	4.51E-250	TUB-2	beta-II tubulin [Homarus americanus]	Cellular Processes;Human Diseases;Cellular Processes	Transport and catabolism;Infectious diseases;Cellular community - eukaryotes	ko04145//Phagosome;ko05130//Pathogenic Escherichia coli infection;ko04540//Gap junction	K07375;K07375;K07375	GO:0015630//microtubule cytoskeleton;GO:0032991//macromolecular complex	GO:0005198//structural molecule activity;GO:0017111//nucleoside-triphosphatase activity;GO:0032550//purine ribonucleoside binding	GO:0043623//cellular protein complex assembly;GO:0044763//single-organism cellular process
7	ncbi_113830149	ncbi_113830149	5.678959321	1.575175587	1.850113921	2.72E-241	7.28E-237	--	hypothetical ferritin light-chain subunit, partial [Rimicaris exoculata]	-	-	-	-	-	-	-
7	ncbi_113825585	Cp1	12.62148728	2.164094382	2.544046599	2.71E-240	7.25E-236	Cp1	cathepsin L [Penaeus monodon]	Human Diseases;Cellular Processes;Cellular Processes;Cellular Processes;Human Diseases;Cellular Processes;Human Diseases;Organismal Systems	Cancers;Transport and catabolism;Transport and catabolism;Cell growth and death;Cardiovascular diseases;Transport and catabolism;Immune diseases;Immune system	ko05205//Proteoglycans in cancer;ko04145//Phagosome;ko04142//Lysosome;ko04210//Apoptosis;ko05418//Fluid shear stress and atherosclerosis;ko04140//Autophagy - animal;ko05323//Rheumatoid arthritis;ko04612//Antigen processing and presentation	K01365;K01365;K01365;K01365;K01365;K01365;K01365;K01365	-	GO:0070011//peptidase activity, acting on L-amino acid peptides	-
7	ncbi_113820575	ncbi_113820575	37.9901524	7.819718041	2.280437006	1.22E-238	3.27E-234	--	PREDICTED: uncharacterized protein LOC108681463 [Hyalella azteca]	-	-	-	-	-	-	-
7	ncbi_113806913	NPC2	1.835411017	0.201317974	3.188555286	3.98E-236	1.07E-231	NPC2	Niemann-Pick type C-2-like protein [Penaeus monodon]	Cellular Processes;Organismal Systems	Transport and catabolism;Digestive system	ko04142//Lysosome;ko04979//Cholesterol metabolism	K13443;K13443	-	-	-
7	ncbi_113804553	ncbi_113804553	54.05605319	3.553068262	3.927318868	6.71E-221	1.80E-216	--	C-type lectin 2 [Marsupenaeus japonicus]	-	-	-	-	-	-	-
7	ncbi_113812049	ncbi_113812049	1.70603607	0.335517009	2.346190338	8.68E-221	2.33E-216	--	PREDICTED: F-box only protein 6-like [Crassostrea gigas]	Genetic Information Processing	Folding, sorting and degradation	ko04141//Protein processing in endoplasmic reticulum	K10100	-	-	-
7	ncbi_113824294	MP1	4.100427065	0.54309046	2.91650975	1.63E-219	4.36E-215	MP1	serine protease 1 [Litopenaeus vannamei]	-	-	-	-	-	-	-
7	ncbi_113803501	ncbi_113803501	0.663457571	0.055932441	3.568247019	6.15E-207	1.65E-202	--	-	-	-	-	-	-	-	-
7	ncbi_113810872	Tspan1	47.39215056	27.26787043	0.797446096	1.21E-202	3.24E-198	Tspan1	PREDICTED: CD9 antigen-like [Hyalella azteca]	Human Diseases;Organismal Systems;Human Diseases	Infectious diseases;Immune system;Infectious diseases	ko05160//Hepatitis C;ko04662//B cell receptor signaling pathway;ko05144//Malaria	K06508;K06508;K06508	GO:0016020//membrane	-	-
7	ncbi_113805950	GRN	3.153171717	0.50763696	2.634934721	2.28E-198	6.12E-194	GRN	PREDICTED: granulins-like isoform X2 [Ciona intestinalis]	-	-	-	-	-	-	-
7	ncbi_113822048	ncbi_113822048	3.893224462	1.031871789	1.915701799	6.61E-198	1.77E-193	--	PREDICTED: innexin inx2-like [Hyalella azteca]	-	-	-	-	-	-	-
7	ncbi_113812463	ncbi_113812463	9.130045855	0.939458506	3.280720759	1.52E-195	4.08E-191	--	-	-	-	-	-	-	-	-
7	ncbi_113809784	ncbi_113809784	3.060701227	0.775085912	1.981434087	1.51E-191	4.03E-187	--	-	-	-	-	-	-	-	-
7	ncbi_113807539	ubi	6.706789852	2.095892343	1.678057784	4.13E-188	1.11E-183	ubi	PREDICTED: polyubiquitin-B-like [Leptonychotes weddellii]	Organismal Systems	Endocrine system	ko03320//PPAR signaling pathway	K08770	-	-	-
7	ncbi_113812059	ncbi_113812059	3.188360172	0.783949959	2.023981139	6.89E-188	1.84E-183	--	-	-	-	-	-	-	-	-
7	ncbi_113812172	ncbi_113812172	10.64997421	2.93615506	1.858849872	2.13E-187	5.71E-183	--	-	-	-	-	-	-	-	-
7	ncbi_113805453	ncbi_113805453	0.7298655	0.079408465	3.200265921	8.65E-185	2.31E-180	--	PREDICTED: uncharacterized protein LOC106655919 isoform X2 [Trichogramma pretiosum]	-	-	-	-	-	-	-
7	ncbi_113815521	PMP2	5.590170824	1.491295424	1.906326288	7.77E-182	2.08E-177	PMP2	intracellular fatty acid-binding protein [Litopenaeus vannamei]	Organismal Systems	Endocrine system	ko03320//PPAR signaling pathway	K08752	-	-	-
7	ncbi_113817695	ncbi_113817695	110.627557	43.30339583	1.353158732	6.65E-181	1.78E-176	--	vascular endothelial growth factor 3 [Litopenaeus vannamei]	-	-	-	-	-	-	-
7	ncbi_113811885	IDH1	5.283046768	1.691474528	1.643088729	9.55E-179	2.56E-174	IDH1	PREDICTED: isocitrate dehydrogenase [NADP] cytoplasmic-like [Lingula anatina]	Metabolism;Metabolism;Metabolism;Cellular Processes;Metabolism;Human Diseases;Metabolism;Metabolism	Global and overview maps;Global and overview maps;Metabolism of other amino acids;Transport and catabolism;Global and overview maps;Cancers;Carbohydrate metabolism;Global and overview maps	ko01100//Metabolic pathways;ko01200//Carbon metabolism;ko00480//Glutathione metabolism;ko04146//Peroxisome;ko01230//Biosynthesis of amino acids;ko05230//Central carbon metabolism in cancer;ko00020//Citrate cycle (TCA cycle);ko01210//2-Oxocarboxylic acid metabolism	K00031;K00031;K00031;K00031;K00031;K00031;K00031;K00031	-	-	-
7	ncbi_113830033	ncbi_113830033	2.531649708	0.628901714	2.009171328	1.03E-177	2.76E-173	--	-	-	-	-	-	-	-	-
7	ncbi_113806075	Kiaa0513	0.710120387	0.109267848	2.700194671	1.36E-177	3.65E-173	Kiaa0513	hypothetical protein L798_07495 [Zootermopsis nevadensis]	-	-	-	-	-	-	-
7	ncbi_113804121	Hr96	0.815137775	0.107385961	2.924238522	3.26E-172	8.74E-168	Hr96	Nuclear hormone receptor HR96 [Daphnia magna]	Organismal Systems	Aging	ko04212//Longevity regulating pathway - worm	K14035	-	-	-
7	ncbi_113824399	ncbi_113824399	1.974917976	0.281603817	2.810053942	1.32E-165	3.52E-161	--	PREDICTED: uncharacterized protein LOC100199872 [Hydra vulgaris]	-	-	-	-	-	-	-
7	ncbi_113809282	ncbi_113809282	13.64383551	5.697406267	1.259872078	4.49E-163	1.20E-158	--	EB module family protein [Trichuris trichiura]	-	-	-	-	-	-	-
7	ncbi_113816132	Rgs2	2.370181397	0.681785118	1.797608463	1.16E-158	3.11E-154	Rgs2	PREDICTED: regulator of G-protein signaling 2-like [Hyalella azteca]	-	-	-	-	-	-	-
7	ncbi_113803524	ncbi_113803524	3.997283292	0.932257446	2.100219502	3.14E-158	8.40E-154	--	-	-	-	-	-	-	-	-
7	ncbi_113826662	ncbi_113826662	1.10170725	0.237212466	2.215489186	2.66E-156	7.12E-152	--	PREDICTED: tyrosine-protein kinase receptor Tie-1 isoform X2 [Chrysemys picta bellii]	-	-	-	-	-	-	-
7	ncbi_113821987	Csk	3.583944619	1.177157482	1.606241005	8.68E-156	2.32E-151	Csk	Tyrosine-protein kinase CSK, partial [Stegodyphus mimosarum]	Human Diseases	Infectious diseases	ko05120//Epithelial cell signaling in Helicobacter pylori infection	K05728	-	-	-
7	ncbi_113804802	mtpn	4.525956614	1.597989471	1.501964852	2.17E-155	5.82E-151	mtpn	Myotrophin [Orchesella cincta]	-	-	-	-	-	-	-
7	ncbi_113807538	ZNFX1	2.345176114	0.591946356	1.986157923	8.33E-155	2.23E-150	ZNFX1	PREDICTED: NFX1-type zinc finger-containing protein 1-like, partial [Hyalella azteca]	-	-	-	-	-	-	-
7	ncbi_113830416	Tstd3	2.109759322	0.52514684	2.006285642	1.91E-154	5.10E-150	Tstd3	rhodanese 1-like protein [Macrobrachium nipponense]	-	-	-	-	-	-	-
7	ncbi_113826280	Phldb2	1.402003881	0.320144393	2.130695696	5.55E-152	1.49E-147	Phldb2	Pleckstrin domain family B member 1 [Daphnia magna]	-	-	-	-	-	-	-
7	ncbi_113822916	ncbi_113822916	17.91662385	6.038827185	1.568958513	2.54E-149	6.80E-145	--	-	-	-	-	-	-	-	-
7	ncbi_113821210	ncbi_113821210	2.067120511	0.498640718	2.051549898	8.53E-148	2.29E-143	--	PREDICTED: uncharacterized protein LOC108675046 [Hyalella azteca]	-	-	-	-	-	-	-
7	ncbi_113820948	ncbi_113820948	2.604392112	0.713020599	1.868931014	1.55E-146	4.14E-142	--	-	-	-	-	-	-	-	-
7	ncbi_113800820	alphaTub85E	6.11164505	2.159905949	1.500592264	1.50E-145	4.00E-141	alphaTub85E	PREDICTED: tubulin alpha-8 chain-like [Hyalella azteca]	Cellular Processes;Cellular Processes;Cellular Processes;Human Diseases;Cellular Processes	Transport and catabolism;Cellular community - eukaryotes;Cell growth and death;Infectious diseases;Cellular community - eukaryotes	ko04145//Phagosome;ko04530//Tight junction;ko04210//Apoptosis;ko05130//Pathogenic Escherichia coli infection;ko04540//Gap junction	K07374;K07374;K07374;K07374;K07374	GO:0015630//microtubule cytoskeleton;GO:0031224//intrinsic component of membrane;GO:0043234//protein complex	GO:0005198//structural molecule activity;GO:0015405//P-P-bond-hydrolysis-driven transmembrane transporter activity;GO:0017111//nucleoside-triphosphatase activity;GO:0032550//purine ribonucleoside binding	GO:0007051//spindle organization;GO:0043623//cellular protein complex assembly;GO:0051234//establishment of localization;GO:0071173//spindle assembly checkpoint
7	ncbi_113803426	RAB8B	2.335017064	0.686341648	1.766434286	1.69E-144	4.52E-140	RAB8B	PREDICTED: ras-related protein Rab-8B-like isoform X1 [Cyprinus carpio]	Cellular Processes	Cellular community - eukaryotes	ko04530//Tight junction	K07902	-	-	-
7	ncbi_113815645	SDHC	5.439139946	2.353497404	1.208572284	2.51E-143	6.73E-139	SDHC	PREDICTED: succinate dehydrogenase cytochrome b560 subunit, mitochondrial-like [Limulus polyphemus]	Metabolism;Organismal Systems;Human Diseases;Metabolism;Human Diseases;Human Diseases;Human Diseases;Metabolism;Metabolism	Global and overview maps;Environmental adaptation;Neurodegenerative diseases;Global and overview maps;Neurodegenerative diseases;Endocrine and metabolic diseases;Neurodegenerative diseases;Energy metabolism;Carbohydrate metabolism	ko01100//Metabolic pathways;ko04714//Thermogenesis;ko05016//Huntington disease;ko01200//Carbon metabolism;ko05010//Alzheimer disease;ko04932//Non-alcoholic fatty liver disease (NAFLD);ko05012//Parkinson disease;ko00190//Oxidative phosphorylation;ko00020//Citrate cycle (TCA cycle)	K00236;K00236;K00236;K00236;K00236;K00236;K00236;K00236;K00236	-	-	-
7	ncbi_113813445	PSAP	1.10610823	0.190911662	2.534515416	5.78E-143	1.55E-138	PSAP	saposin isoform 1 [Penaeus monodon]	Cellular Processes	Transport and catabolism	ko04142//Lysosome	K12382	-	-	-
7	ncbi_113811194	ncbi_113811194	7.043967397	2.540477459	1.471288568	1.49E-142	4.00E-138	--	-	-	-	-	-	-	-	-
7	ncbi_113803166	FAXDC2	0.979514329	0.190550696	2.361891718	1.01E-141	2.69E-137	FAXDC2	PREDICTED: fatty acid hydroxylase domain-containing protein 2 [Microplitis demolitor]	-	-	-	-	-	-	-
7	ncbi_113816315	BMPER	2.092163566	0.440931415	2.246369475	3.23E-140	8.64E-136	BMPER	PREDICTED: BMP-binding endothelial regulator protein-like [Parasteatoda tepidariorum]	-	-	-	-	-	-	-
7	ncbi_113805954	slc16a10	0.560963528	0.120384244	2.220260387	9.01E-137	2.41E-132	slc16a10	PREDICTED: monocarboxylate transporter 10-like [Hyalella azteca]	Organismal Systems;Organismal Systems	Endocrine system;Digestive system	ko04919//Thyroid hormone signaling pathway;ko04974//Protein digestion and absorption	K08187;K08187	-	-	-
7	ncbi_113816494	TAGLN2	26.57679393	10.96270962	1.277562647	2.75E-135	7.36E-131	TAGLN2	PREDICTED: myophilin isoform X1 [Cephus cinctus]	-	-	-	-	-	-	-
7	ncbi_113806076	TUBB4B	3.371211485	0.5846258	2.527681731	3.79E-133	1.01E-128	TUBB4B	beta-II tubulin [Homarus americanus]	Cellular Processes;Human Diseases;Cellular Processes	Transport and catabolism;Infectious diseases;Cellular community - eukaryotes	ko04145//Phagosome;ko05130//Pathogenic Escherichia coli infection;ko04540//Gap junction	K07375;K07375;K07375	GO:0015630//microtubule cytoskeleton;GO:0032991//macromolecular complex	GO:0005198//structural molecule activity;GO:0017111//nucleoside-triphosphatase activity;GO:0032550//purine ribonucleoside binding	GO:0043623//cellular protein complex assembly;GO:0044763//single-organism cellular process
7	ncbi_113824350	BTG1	2.563128755	0.807990184	1.665496281	5.23E-129	1.40E-124	BTG1	BTG1-like protein [Coptotermes formosanus]	Genetic Information Processing	Folding, sorting and degradation	ko03018//RNA degradation	K14443	-	-	-
7	ncbi_113802927	ncbi_113802927	2.978963982	0.875358819	1.766864261	3.01E-128	8.07E-124	--	Zinc-type alcohol dehydrogenase-like protein [Zootermopsis nevadensis]	-	-	-	-	-	-	-
7	ncbi_113823424	MKNK2	0.751985669	0.175701141	2.09758161	4.12E-125	1.10E-120	MKNK2	map kinase-interacting serine/threonine, partial [Scylla paramamosain]	Environmental Information Processing;Organismal Systems;Environmental Information Processing	Signal transduction;Endocrine system;Signal transduction	ko04010//MAPK signaling pathway;ko04910//Insulin signaling pathway;ko04066//HIF-1 signaling pathway	K04372;K04372;K04372	-	-	-
7	ncbi_113820544	ncbi_113820544	0.537817583	0.085025423	2.661150743	8.95E-125	2.40E-120	--	-	-	-	-	-	-	-	-
7	ncbi_113802377	ncbi_113802377	0.691774911	0.130929993	2.401507071	1.96E-123	5.26E-119	--	lysophospholipase, putative [Plasmodium chabaudi chabaudi]	-	-	-	-	-	-	-
7	ncbi_113806506	ncbi_113806506	1.431800763	0.147993961	3.274220541	2.36E-120	6.33E-116	--	-	-	-	-	-	-	-	-
7	ncbi_113824023	ncbi_113824023	2.234912927	0.604707878	1.885908345	3.12E-117	8.37E-113	--	PREDICTED: integral membrane protein 2A [Tribolium castaneum]	-	-	-	-	-	-	-
7	ncbi_113827890	BAZ1A	1.871084678	0.599371008	1.642353645	2.94E-115	7.87E-111	BAZ1A	Bromodomain adjacent to zinc finger domain protein 1A [Orchesella cincta]	-	-	-	-	-	-	-
7	ncbi_113800869	ncbi_113800869	1.363382365	0.255314606	2.416842248	2.97E-115	7.96E-111	--	-	-	-	-	-	-	-	-
7	ncbi_113800527	PTPRA	1.240692629	0.329820618	1.911392253	5.02E-114	1.35E-109	PTPRA	PREDICTED: receptor-type tyrosine-protein phosphatase O [Crassostrea gigas]	Cellular Processes	Cellular community - eukaryotes	ko04520//Adherens junction	K05694	-	-	GO:0009987//cellular process
7	ncbi_113809310	ncbi_113809310	0.678690884	0.15077592	2.170348596	6.53E-114	1.75E-109	--	APOBEC1 complementation factor [Cricetulus griseus]	-	-	-	-	-	-	-
7	ncbi_113811689	GABARAP	11.6278968	6.402493214	0.860884449	1.26E-109	3.37E-105	GABARAP	autophagy-related protein 8 [Litopenaeus vannamei]	Cellular Processes;Environmental Information Processing;Organismal Systems;Organismal Systems;Environmental Information Processing;Organismal Systems;Human Diseases;Cellular Processes;Cellular Processes	Transport and catabolism;Signal transduction;Aging;Immune system;Signal transduction;Nervous system;Infectious diseases;Transport and catabolism;Transport and catabolism	ko04140//Autophagy - animal;ko04068//FoxO signaling pathway;ko04212//Longevity regulating pathway - worm;ko04621//NOD-like receptor signaling pathway;ko04371//Apelin signaling pathway;ko04727//GABAergic synapse;ko05167//Kaposi sarcoma-associated herpesvirus infection;ko04137//Mitophagy - animal;ko04136//Autophagy - other eukaryotes	K08341;K08341;K08341;K08341;K08341;K08341;K08341;K08341;K08341	GO:0005767//secondary lysosome;GO:0005775//vacuolar lumen;GO:0005776//autophagosome	GO:0019900//kinase binding	GO:0006914//autophagy;GO:0010259//multicellular organism aging;GO:0010623//developmental programmed cell death;GO:0031329//regulation of cellular catabolic process;GO:1903320//regulation of protein modification by small protein conjugation or removal
7	ncbi_113826499	Mmel1	4.660303988	2.293978125	1.02257243	1.48E-108	3.96E-104	Mmel1	PREDICTED: neprilysin-like isoform X1 [Hyalella azteca]	-	-	-	-	-	-	-
7	ncbi_113809156	ncbi_113809156	1.452826115	0.341579547	2.088568544	2.88E-108	7.72E-104	--	PREDICTED: uncharacterized transmembrane protein DDB_G0289901-like [Hyalella azteca]	-	-	-	-	-	-	-
7	ncbi_113809896	ncbi_113809896	3.830603232	0.706445542	2.438921344	1.05E-105	2.82E-101	--	hemocyte homeostasis-associated protein [Litopenaeus vannamei]	-	-	-	-	-	-	-
7	ncbi_113814557	Ptprt	2.493299169	0.949530342	1.392769994	7.73E-105	2.07E-100	Ptprt	PREDICTED: receptor-type tyrosine-protein phosphatase alpha-like [Hyalella azteca]	Cellular Processes;Organismal Systems;Human Diseases;Environmental Information Processing	Cellular community - eukaryotes;Endocrine system;Endocrine and metabolic diseases;Signaling molecules and interaction	ko04520//Adherens junction;ko04910//Insulin signaling pathway;ko04931//Insulin resistance;ko04514//Cell adhesion molecules (CAMs)	K05695;K05695;K05695;K05695	-	-	-
7	ncbi_113821528	ncbi_113821528	0.932032921	0.221088651	2.075755941	9.96E-104	2.67E-99	--	-	-	-	-	-	-	-	-
7	ncbi_113807541	ncbi_113807541	3.466131659	0.943661807	1.876984637	1.17E-103	3.13E-99	--	hypothetical protein DAPPUDRAFT_213114 [Daphnia pulex]	-	-	-	-	-	-	-
7	ncbi_113818299	ncbi_113818299	3.572463944	1.000749462	1.835838611	3.38E-102	9.04E-98	--	farnesoic acid O-methyltransferase [Litopenaeus vannamei]	-	-	-	-	-	-	-
7	ncbi_113820945	SNAP29	1.028057293	0.192644853	2.415905119	9.96E-102	2.67E-97	SNAP29	PREDICTED: synaptosomal-associated protein 29-like [Hyalella azteca]	Cellular Processes;Genetic Information Processing	Transport and catabolism;Folding, sorting and degradation	ko04140//Autophagy - animal;ko04130//SNARE interactions in vesicular transport	K08509;K08509	-	-	-
7	ncbi_113821081	ncbi_113821081	2.890957753	1.110877359	1.379847974	1.66E-101	4.45E-97	--	-	-	-	-	-	-	-	-
7	ncbi_113803506	Chia	0.638872738	0.145646218	2.133060336	2.89E-101	7.75E-97	Chia	chitinase 1C [Macrobrachium nipponense]	Metabolism;Metabolism	Global and overview maps;Carbohydrate metabolism	ko01100//Metabolic pathways;ko00520//Amino sugar and nucleotide sugar metabolism	K01183;K01183	-	-	GO:0008152//metabolic process
7	ncbi_113811749	ced-10	1.804019276	0.620934581	1.538701569	7.45E-101	1.99E-96	ced-10	PREDICTED: ras-like GTP-binding protein RhoL [Cerapachys biroi]	Human Diseases;Cellular Processes;Human Diseases;Cellular Processes;Environmental Information Processing;Cellular Processes;Cellular Processes;Environmental Information Processing;Human Diseases;Environmental Information Processing;Cellular Processes;Human Diseases;Human Diseases;Human Diseases;Human Diseases;Environmental Information Processing;Organismal Systems;Environmental Information Proces…	Cancers;Cellular community - eukaryotes;Cancers;Transport and catabolism;Signal transduction;Cell motility;Cellular community - eukaryotes;Signal transduction;Cancers;Signal transduction;Cellular community - eukaryotes;Cardiovascular diseases;Infectious diseases;Infectious diseases;Infectious diseases;Signal transduction;Digestive system;Signal transduction;Cancers;Cardiovascular diseases;Signal …	ko05200//Pathways in cancer;ko04510//Focal adhesion;ko05205//Proteoglycans in cancer;ko04145//Phagosome;ko04151//PI3K-Akt signaling pathway;ko04810//Regulation of actin cytoskeleton;ko04530//Tight junction;ko04015//Rap1 signaling pathway;ko05231//Choline metabolism in cancer;ko04013//MAPK signaling pathway - fly;ko04520//Adherens junction;ko05418//Fluid shear stress and atherosclerosis;ko05131//S…	K04392;K04392;K04392;K04392;K04392;K04392;K04392;K04392;K04392;K04392;K04392;K04392;K04392;K04392;K04392;K04392;K04392;K04392;K04392;K04392;K04392;K04392;K04392;K04392;K04392;K04392;K04392;K04392;K04392;K04392;K04392;K04392;K04392;K04392;K04392;K04392;K04392;K04392;K04392;K04392;K04392;K04392;K04392	-	-	-
7	ncbi_113802824	ncbi_113802824	2.519999087	0.997613482	1.336870343	5.81E-100	1.56E-95	--	-	-	-	-	-	-	-	-
7	ncbi_113800624	ncbi_113800624	5.497669241	1.765717054	1.638565934	6.46E-100	1.73E-95	--	TUS1306 [Penaeus monodon]	-	-	-	-	-	-	-
7	ncbi_113821440	fth1-a	17.42615562	7.622277956	1.192960208	2.37E-99	6.35E-95	fth1-a	ferritin [Litopenaeus vannamei]	Cellular Processes;Organismal Systems;Cellular Processes	Cell growth and death;Digestive system;Cell growth and death	ko04217//Necroptosis;ko04978//Mineral absorption;ko04216//Ferroptosis	K00522;K00522;K00522	-	-	-
7	ncbi_113824549	ncbi_113824549	1.352513151	0.427449718	1.661815996	2.58E-97	6.90E-93	--	PREDICTED: interferon alpha-inducible protein 27-like protein 2A isoform X1 [Poecilia mexicana]	-	-	-	-	-	-	-
7	ncbi_113823208	ncbi_113823208	1.37409878	0.425341273	1.691792959	6.00E-97	1.61E-92	--	-	-	-	-	-	-	-	-
7	ncbi_113829247	ncbi_113829247	8.013635932	3.232467045	1.309821306	7.02E-96	1.88E-91	--	PREDICTED: EF-hand domain-containing protein D2 homolog isoform X2 [Hyalella azteca]	-	-	-	-	-	-	-
7	ncbi_113824784	ncbi_113824784	1.856033233	0.669212925	1.471685328	2.08E-95	5.58E-91	--	-	-	-	-	-	-	-	-
7	ncbi_113818648	ncbi_113818648	2.268449494	0.749228381	1.598229083	5.43E-95	1.45E-90	--	G protein-coupled receptor [Procambarus clarkii]	-	-	-	-	-	-	-
7	ncbi_113813144	PSAP	0.765607716	0.142027715	2.430432893	1.52E-94	4.06E-90	PSAP	saposin isoform 1 [Penaeus monodon]	Cellular Processes	Transport and catabolism	ko04142//Lysosome	K12382	-	-	-
7	ncbi_113816016	pes	0.608535481	0.131453737	2.210786229	1.80E-94	4.82E-90	pes	scavenger receptor [Litopenaeus vannamei]	-	-	-	-	-	-	-
7	ncbi_113813553	Sdcbp	1.865327446	0.665800536	1.486266971	2.98E-94	7.97E-90	Sdcbp	syntenin [Penaeus monodon]	-	-	-	-	-	-	-
7	ncbi_113806912	Baz1a	1.636562034	0.546822789	1.581523015	4.17E-93	1.12E-88	Baz1a	PREDICTED: bromodomain adjacent to zinc finger domain protein 1A-like [Hyalella azteca]	-	-	-	-	GO:0031010//ISWI-type complex	GO:0046872//metal ion binding;GO:0090595//acetyl-CoA:L-lysine N6-acetyltransferase	GO:0006260//DNA replication;GO:0010468//regulation of gene expression;GO:0016568//chromatin modification
7	ncbi_113807597	ncbi_113807597	2.190644639	0.887153054	1.304100544	7.00E-93	1.87E-88	--	-	-	-	-	-	-	-	-
7	ncbi_113807791	ncbi_113807791	1.26293971	0.439322998	1.523431839	1.93E-92	5.16E-88	--	-	-	-	-	-	-	-	-
7	ncbi_113829324	TMX1	3.824010865	1.828412115	1.064495339	4.75E-92	1.27E-87	TMX1	Thioredoxin-related transmembrane protein 1 [Daphnia magna]	-	-	-	-	-	-	-
7	ncbi_113806028	Fam13a	2.418398342	1.004151564	1.268074852	6.71E-92	1.80E-87	Fam13a	PREDICTED: protein FAM13A isoform X1 [Nicrophorus vespilloides]	-	-	-	-	-	-	-
7	ncbi_113812934	ncbi_113812934	0.622217019	0.190162583	1.710184454	1.85E-90	4.95E-86	--	neuroglobin isoform 1 [Cherax cainii]	-	-	-	-	-	-	-
7	ncbi_113830028	ncbi_113830028	1.42641162	0.477398365	1.579124829	6.31E-90	1.69E-85	--	PREDICTED: calphotin-like isoform X6 [Lates calcarifer]	-	-	-	-	-	-	-
7	ncbi_113804967	ncbi_113804967	6.324299597	3.457641643	0.871117361	2.98E-89	7.98E-85	--	-	-	-	-	-	-	-	-
7	ncbi_113802357	Rac2	1.736712282	0.62002216	1.48596708	1.28E-88	3.43E-84	Rac2	PREDICTED: rho-related GTP-binding protein RhoQ isoform X1 [Pseudopodoces humilis]	Human Diseases;Cellular Processes;Human Diseases;Cellular Processes;Environmental Information Processing;Cellular Processes;Cellular Processes;Environmental Information Processing;Human Diseases;Environmental Information Processing;Cellular Processes;Human Diseases;Human Diseases;Human Diseases;Human Diseases;Environmental Information Processing;Organismal Systems;Environmental Information Proces…	Cancers;Cellular community - eukaryotes;Cancers;Transport and catabolism;Signal transduction;Cell motility;Cellular community - eukaryotes;Signal transduction;Cancers;Signal transduction;Cellular community - eukaryotes;Cardiovascular diseases;Infectious diseases;Infectious diseases;Infectious diseases;Signal transduction;Digestive system;Signal transduction;Cancers;Cardiovascular diseases;Signal …	ko05200//Pathways in cancer;ko04510//Focal adhesion;ko05205//Proteoglycans in cancer;ko04145//Phagosome;ko04151//PI3K-Akt signaling pathway;ko04810//Regulation of actin cytoskeleton;ko04530//Tight junction;ko04015//Rap1 signaling pathway;ko05231//Choline metabolism in cancer;ko04013//MAPK signaling pathway - fly;ko04520//Adherens junction;ko05418//Fluid shear stress and atherosclerosis;ko05131//S…	K04392;K04392;K04392;K04392;K04392;K04392;K04392;K04392;K04392;K04392;K04392;K04392;K04392;K04392;K04392;K04392;K04392;K04392;K04392;K04392;K04392;K04392;K04392;K04392;K04392;K04392;K04392;K04392;K04392;K04392;K04392;K04392;K04392;K04392;K04392;K04392;K04392;K04392;K04392;K04392;K04392;K04392;K04392	-	-	-
7	ncbi_113817408	CSNK1E	2.855115904	1.207441341	1.24159621	2.97E-88	7.95E-84	CSNK1E	casein kinase 1 epsilon [Eurydice pulchra]	Environmental Information Processing;Cellular Processes;Environmental Information Processing;Organismal Systems	Signal transduction;Cellular community - eukaryotes;Signal transduction;Environmental adaptation	ko04390//Hippo signaling pathway;ko04540//Gap junction;ko04340//Hedgehog signaling pathway;ko04710//Circadian rhythm	K08959;K08959;K08959;K08959	-	GO:0004672//protein kinase activity;GO:0032550//purine ribonucleoside binding	GO:0006464//cellular protein modification process
7	ncbi_5333214	COX2	51.01905967	37.05754212	0.461269113	7.11E-88	1.90E-83	COX2	-	-	-	-	-	-	-	-
7	ncbi_113808603	chst14	0.797127519	0.238545408	1.740546619	8.40E-86	2.25E-81	chst14	PREDICTED: carbohydrate sulfotransferase 11 isoform X2 [Ceratitis capitata]	Metabolism	Glycan biosynthesis and metabolism	ko00532//Glycosaminoglycan biosynthesis - chondroitin sulfate / dermatan sulfate	K01017	-	-	-
7	ncbi_113808316	pi4kb	0.731537689	0.161269689	2.181456888	1.38E-85	3.69E-81	pi4kb	PREDICTED: phosphatidylinositol 4-kinase beta-like [Hyalella azteca]	Metabolism;Metabolism;Environmental Information Processing	Global and overview maps;Carbohydrate metabolism;Signal transduction	ko01100//Metabolic pathways;ko00562//Inositol phosphate metabolism;ko04070//Phosphatidylinositol signaling system	K19801;K19801;K19801	-	GO:0016740//transferase activity	GO:0009987//cellular process
7	ncbi_113812324	ncbi_113812324	2.051950477	0.767544363	1.418673869	5.23E-85	1.40E-80	--	PREDICTED: rac-like GTP-binding protein ARAC7 [Crassostrea gigas]	-	-	-	-	-	-	-
7	ncbi_113822181	RASA1	1.152077263	0.339991359	1.760667488	7.12E-85	1.91E-80	RASA1	PREDICTED: ras GTPase-activating protein 1-like [Hyalella azteca]	Environmental Information Processing;Environmental Information Processing;Environmental Information Processing;Organismal Systems	Signal transduction;Signal transduction;Signal transduction;Development	ko04013//MAPK signaling pathway - fly;ko04010//MAPK signaling pathway;ko04014//Ras signaling pathway;ko04360//Axon guidance	K04352;K04352;K04352;K04352	-	-	-
7	ncbi_113821533	PTPRA	1.989811172	0.79441542	1.324665997	9.03E-84	2.42E-79	PTPRA	PREDICTED: receptor-type tyrosine-protein phosphatase alpha-like [Hyalella azteca]	-	-	-	-	-	-	-
7	ncbi_113813125	ncbi_113813125	1.097606784	0.333758282	1.717485762	1.74E-82	4.65E-78	--	PREDICTED: E3 ubiquitin-protein ligase TRIM32 isoform X4 [Poecilia reticulata]	-	-	-	-	-	GO:0005488//binding	GO:0044238//primary metabolic process;GO:0044260//cellular macromolecule metabolic process;GO:0044763//single-organism cellular process;GO:0048522//positive regulation of cellular process
7	ncbi_113821397	Tctp	80.79213051	60.96201141	0.406304271	1.04E-81	2.79E-77	Tctp	translationally controlled tumor protein [Litopenaeus vannamei]	-	-	-	-	-	-	-
7	ncbi_113830113	ncbi_113830113	0.850810343	0.256179126	1.731684645	1.87E-81	5.01E-77	--	PREDICTED: collagen alpha-1(III) chain-like [Clupea harengus]	-	-	-	-	-	-	GO:0044763//single-organism cellular process;GO:0048731//system development;GO:0050896//response to stimulus
7	ncbi_113803586	ncbi_113803586	0.908654067	0.240107019	1.920053574	8.38E-80	2.24E-75	--	-	-	-	-	-	-	-	-
7	ncbi_113822389	ncbi_113822389	3.549352698	1.286290672	1.464339246	3.50E-79	9.37E-75	--	-	-	-	-	-	-	-	-
7	ncbi_113820498	ncbi_113820498	2.857899057	1.353019352	1.078772486	1.88E-78	5.04E-74	--	-	-	-	-	-	-	-	-
7	ncbi_113822921	ncbi_113822921	0.841007855	0.260509861	1.69078129	2.26E-78	6.04E-74	--	-	-	-	-	-	-	-	-
7	ncbi_113816169	ncbi_113816169	1.631850794	0.624274133	1.38625756	2.81E-78	7.53E-74	--	PREDICTED: tripartite motif-containing protein 2-like [Biomphalaria glabrata]	-	-	-	-	-	-	-
7	ncbi_113815788	TBCB	2.23942132	0.758893931	1.561155816	1.61E-75	4.31E-71	TBCB	PREDICTED: tubulin-folding cofactor B-like [Hyalella azteca]	-	-	-	-	GO:0005856//cytoskeleton;GO:0044444//cytoplasmic part	-	GO:0006457//protein folding;GO:0007275//multicellular organism development
7	ncbi_113826501	ncbi_113826501	0.524833548	0.149515306	1.811566762	3.81E-75	1.02E-70	--	PREDICTED: neprilysin-like isoform X1 [Hyalella azteca]	-	-	-	-	-	-	-
7	ncbi_113816059	ELK3	0.605276436	0.181801672	1.735228719	1.15E-74	3.09E-70	ELK3	ETS domain-containing protein Elk-3 [Zootermopsis nevadensis]	Human Diseases;Human Diseases;Environmental Information Processing	Infectious diseases;Cancers;Signal transduction	ko05166//HTLV-I infection;ko05202//Transcriptional misregulation in cancers;ko04010//MAPK signaling pathway	K04376;K04376;K04376	GO:0043231//intracellular membrane-bounded organelle	GO:0001071//nucleic acid binding transcription factor activity;GO:0003677//DNA binding	GO:0010468//regulation of gene expression
7	ncbi_5333215	COX3	44.02185294	33.53604288	0.392507405	1.37E-74	3.68E-70	COX3	-	-	-	-	-	-	-	-
7	ncbi_113799956	Cblb	1.492163327	0.587604009	1.344489313	2.85E-73	7.63E-69	Cblb	PREDICTED: E3 ubiquitin-protein ligase CBL-B-like isoform X1 [Hyalella azteca]	Human Diseases;Human Diseases;Cellular Processes;Genetic Information Processing;Human Diseases;Organismal Systems;Environmental Information Processing;Human Diseases	Cancers;Cancers;Transport and catabolism;Folding, sorting and degradation;Infectious diseases;Endocrine system;Signal transduction;Cancers	ko05200//Pathways in cancer;ko05205//Proteoglycans in cancer;ko04144//Endocytosis;ko04120//Ubiquitin mediated proteolysis;ko05100//Bacterial invasion of epithelial cells;ko04910//Insulin signaling pathway;ko04012//ErbB signaling pathway;ko05220//Chronic myeloid leukemia	K04707;K04707;K04707;K04707;K04707;K04707;K04707;K04707	GO:0043231//intracellular membrane-bounded organelle	GO:0019787//ubiquitin-like protein transferase activity;GO:0046914//transition metal ion binding;GO:0060089//molecular transducer activity	GO:0007165//signal transduction;GO:0032446//protein modification by small protein conjugation
7	ncbi_113811357	ovca2	1.401838074	0.539191185	1.378450898	5.79E-73	1.55E-68	ovca2	PREDICTED: ovarian cancer-associated gene 2 protein homolog [Lingula anatina]	-	-	-	-	-	-	-
7	ncbi_113809150	Sacs	1.119995828	0.342575615	1.708998992	1.00E-72	2.68E-68	Sacs	PREDICTED: sacsin-like [Acropora digitifera]	-	-	-	-	-	-	-
7	ncbi_113805200	ncbi_113805200	2.552231494	0.949053763	1.427197468	3.81E-69	1.02E-64	--	-	-	-	-	-	-	-	-
7	ncbi_113809815	FAM49B	2.087476919	0.946682911	1.140807061	5.48E-69	1.47E-64	FAM49B	PREDICTED: protein FAM49B-like [Hyalella azteca]	-	-	-	-	-	-	-
7	ncbi_113821426	ncbi_113821426	0.882112757	0.27039014	1.705920537	5.58E-69	1.50E-64	--	Cyclin-Y [Daphnia magna]	-	-	-	-	-	-	-
7	ncbi_113823310	ncbi_113823310	14.66214293	9.049079678	0.696252996	1.13E-68	3.02E-64	--	PREDICTED: immediate early response gene 2 protein-like [Halyomorpha halys]	-	-	-	-	-	-	-
7	ncbi_113827363	ncbi_113827363	0.848988211	0.265897503	1.674874291	5.66E-68	1.52E-63	--	-	-	-	-	-	-	-	-
7	ncbi_113805740	Rusc2	0.627000546	0.194733193	1.686967879	6.01E-68	1.61E-63	Rusc2	Iporin [Papilio xuthus]	-	-	-	-	-	-	-
7	ncbi_113824472	ncbi_113824472	7.444119271	3.144263382	1.243379099	6.05E-68	1.62E-63	--	-	-	-	-	-	-	-	-
7	ncbi_113824804	VAMP3	6.85764599	4.278019148	0.68077049	6.70E-68	1.79E-63	VAMP3	vesicle-associated membrane protein [Procambarus clarkii]	Organismal Systems;Organismal Systems;Organismal Systems;Organismal Systems;Genetic Information Processing	Digestive system;Endocrine system;Nervous system;Excretory system;Folding, sorting and degradation	ko04970//Salivary secretion;ko04911//Insulin secretion;ko04721//Synaptic vesicle cycle;ko04962//Vasopressin-regulated water reabsorption;ko04130//SNARE interactions in vesicular transport	K13504;K13504;K13504;K13504;K13504	GO:0031224//intrinsic component of membrane	-	GO:0006810//transport
7	ncbi_113800526	ncbi_113800526	1.018743063	0.366747392	1.473931623	9.05E-68	2.42E-63	--	-	-	-	-	-	-	-	-
7	ncbi_113829061	FAM151B	0.695776037	0.16888963	2.042542241	2.04E-67	5.45E-63	FAM151B	PREDICTED: protein FAM151B-like isoform X1 [Hyalella azteca]	-	-	-	-	-	-	-
7	ncbi_113803693	ncbi_113803693	1.400412922	0.577801294	1.27720694	2.88E-67	7.71E-63	--	PREDICTED: tripartite motif-containing protein 65-like [Hyalella azteca]	-	-	-	-	-	-	GO:0002376//immune system process;GO:0048513//animal organ development;GO:0065007//biological regulation
7	ncbi_5333205	COX1	13.72621146	9.808915815	0.484767897	1.75E-66	4.67E-62	COX1	-	-	-	-	-	-	-	-
7	ncbi_113803500	ncbi_113803500	1.740398449	0.664406667	1.389279181	1.85E-66	4.96E-62	--	-	-	-	-	-	-	-	-
7	ncbi_113807613	sup-17	1.011866993	0.363053643	1.478765031	6.39E-65	1.71E-60	sup-17	disintegrin and metalloproteinase domain-containing protein 10 [Eriocheir sinensis]	Human Diseases;Human Diseases	Neurodegenerative diseases;Infectious diseases	ko05010//Alzheimer disease;ko05120//Epithelial cell signaling in Helicobacter pylori infection	K06704;K06704	-	-	-
7	ncbi_113804609	ncbi_113804609	76.66231445	56.68109175	0.435650007	3.19E-64	8.55E-60	--	PREDICTED: uncharacterized protein LOC108678985 [Hyalella azteca]	-	-	-	-	-	-	-
7	ncbi_113829108	let-70	2.502455621	1.166366502	1.101323293	6.12E-64	1.64E-59	let-70	Ubiquitin-conjugating enzyme/RWD-like protein [Pseudocohnilembus persalinus]	Genetic Information Processing;Environmental Information Processing;Genetic Information Processing;Human Diseases;Organismal Systems	Folding, sorting and degradation;Signal transduction;Folding, sorting and degradation;Infectious diseases;Immune system	ko04141//Protein processing in endoplasmic reticulum;ko04013//MAPK signaling pathway - fly;ko04120//Ubiquitin mediated proteolysis;ko05131//Shigellosis;ko04624//Toll and Imd signaling pathway	K06689;K06689;K06689;K06689;K06689	GO:0043234//protein complex	GO:0004842//ubiquitin-protein transferase activity;GO:0044389//ubiquitin-like protein ligase binding	GO:0001754//eye photoreceptor cell differentiation;GO:0007126//meiotic nuclear division;GO:0010608//posttranscriptional regulation of gene expression;GO:0016567//protein ubiquitination;GO:0019827//stem cell population maintenance;GO:0042551//neuron maturation;GO:0043161//proteasome-mediated ubiquitin-dependent protein catabolic process;GO:0046532//regulation of photoreceptor cell differentiation;…
7	ncbi_5333206	CYTB	13.14961897	9.384398493	0.486684815	6.50E-64	1.74E-59	CYTB	-	-	-	-	-	-	-	-
7	ncbi_113809200	ncbi_113809200	1.413607994	0.595913698	1.246206789	8.77E-64	2.35E-59	--	transient receptor potential cation channel pyrexia [Homarus americanus]	-	-	-	-	-	-	-
7	ncbi_113800860	Inx3	10.49887485	7.060887439	0.572313302	3.27E-63	8.75E-59	Inx3	innexin 7 [Homarus americanus]	-	-	-	-	-	-	-
7	ncbi_113827797	Slk	2.973367297	1.574651231	0.917065366	1.31E-62	3.51E-58	Slk	PREDICTED: serine/threonine-protein kinase 10-like isoform X1 [Hyalella azteca]	Cellular Processes	Cell growth and death	ko04114//Oocyte meiosis	K08836	-	-	-
7	ncbi_113812471	Gdh	0.791278763	0.238780846	1.72849892	4.62E-62	1.24E-57	Gdh	glutamate dehydrogenase [Litopenaeus vannamei]	Metabolism;Metabolism;Cellular Processes;Metabolism;Organismal Systems;Metabolism;Metabolism;Metabolism	Global and overview maps;Global and overview maps;Cell growth and death;Amino acid metabolism;Excretory system;Amino acid metabolism;Energy metabolism;Metabolism of other amino acids	ko01100//Metabolic pathways;ko01200//Carbon metabolism;ko04217//Necroptosis;ko00250//Alanine, aspartate and glutamate metabolism;ko04964//Proximal tubule bicarbonate reclamation;ko00220//Arginine biosynthesis;ko00910//Nitrogen metabolism;ko00471//D-Glutamine and D-glutamate metabolism	K00261;K00261;K00261;K00261;K00261;K00261;K00261;K00261	-	GO:0003824//catalytic activity	GO:0044710//single-organism metabolic process
7	ncbi_113812833	Furin	0.721080471	0.240282692	1.585427537	6.25E-62	1.67E-57	Furin	PREDICTED: furin-1-like isoform X2 [Poecilia mexicana]	Human Diseases	Infectious diseases	ko05164//Influenza A	K01349	-	GO:0016787//hydrolase activity	GO:0033333//fin development;GO:0048513//animal organ development;GO:0048598//embryonic morphogenesis
7	ncbi_113828271	ncbi_113828271	0.923916901	0.359692641	1.360998455	9.84E-62	2.64E-57	--	PREDICTED: uncharacterized protein LOC108676634 [Hyalella azteca]	-	-	-	-	-	-	-
7	ncbi_113810727	DNAJC7	2.808373751	1.279259183	1.134426359	2.57E-61	6.88E-57	DNAJC7	PREDICTED: dnaJ homolog subfamily C member 7-like isoform X3 [Hyalella azteca]	-	-	-	-	-	-	-
7	ncbi_113803399	ncbi_113803399	0.502555013	0.139441799	1.849618442	3.97E-60	1.06E-55	--	-	-	-	-	-	-	-	-
7	ncbi_113824964	ncbi_113824964	0.937642644	0.312743362	1.584058923	9.91E-60	2.65E-55	--	hypothetical protein CGI_10010969 [Crassostrea gigas]	-	-	-	-	-	-	-
7	ncbi_113823695	ncbi_113823695	1.939182397	1.030560007	0.912019997	2.19E-59	5.86E-55	--	hypothetical protein BRAFLDRAFT_69362 [Branchiostoma floridae]	-	-	-	-	-	-	-
7	ncbi_113820125	Moe	4.986024738	2.903274195	0.78020921	1.05E-58	2.81E-54	Moe	PREDICTED: moesin/ezrin/radixin homolog 1-like isoform X2 [Hyalella azteca]	-	-	-	-	-	-	-
7	ncbi_113823947	TNFAIP8	5.016901433	3.214299147	0.64229239	1.17E-58	3.12E-54	TNFAIP8	PREDICTED: tumor necrosis factor alpha-induced protein 8-like protein [Hyalella azteca]	-	-	-	-	-	-	-
7	ncbi_113803885	GBETA1	3.871051315	2.34647404	0.722230933	7.43E-58	1.99E-53	GBETA1	G protein beta 1 subunit [Litopenaeus vannamei]	Human Diseases;Environmental Information Processing;Human Diseases;Environmental Information Processing;Organismal Systems;Organismal Systems;Organismal Systems;Human Diseases;Organismal Systems;Organismal Systems;Organismal Systems;Organismal Systems;Environmental Information Processing;Organismal Systems;Human Diseases;Organismal Systems;Human Diseases;Organismal Systems;Organismal Systems	Cancers;Signal transduction;Substance dependence;Signal transduction;Immune system;Nervous system;Endocrine system;Infectious diseases;Nervous system;Nervous system;Nervous system;Nervous system;Signal transduction;Nervous system;Infectious diseases;Environmental adaptation;Substance dependence;Sensory system;Sensory system	ko05200//Pathways in cancer;ko04151//PI3K-Akt signaling pathway;ko05034//Alcoholism;ko04014//Ras signaling pathway;ko04062//Chemokine signaling pathway;ko04723//Retrograde endocannabinoid signaling;ko04926//Relaxin signaling pathway;ko05163//Human cytomegalovirus infection;ko04726//Serotonergic synapse;ko04724//Glutamatergic synapse;ko04725//Cholinergic synapse;ko04728//Dopaminergic synapse;ko043…	K04536;K04536;K04536;K04536;K04536;K04536;K04536;K04536;K04536;K04536;K04536;K04536;K04536;K04536;K04536;K04536;K04536;K04536;K04536	-	-	-
7	ncbi_113817207	ncbi_113817207	1.992081861	0.984694385	1.016528997	1.75E-57	4.68E-53	--	activating transcription factor 4 [Litopenaeus vannamei]	-	-	-	-	-	-	-
7	ncbi_113809313	ncbi_113809313	2.16703894	1.076962519	1.008757036	6.65E-56	1.78E-51	--	PREDICTED: uncharacterized protein LOC108675177 [Hyalella azteca]	-	-	-	-	-	-	-
7	ncbi_113800422	ncbi_113800422	6.022207128	0.730482678	3.04337036	7.94E-54	2.13E-49	--	gill C-type lectin [Marsupenaeus japonicus]	-	-	-	-	-	-	-
7	ncbi_113808602	ncbi_113808602	0.716832297	0.228844162	1.647270155	2.90E-53	7.75E-49	--	-	-	-	-	-	-	-	-
7	ncbi_113813544	SDCBP	0.799501325	0.293372223	1.446368146	4.56E-53	1.22E-48	SDCBP	syntenin [Penaeus monodon]	-	-	-	-	-	-	-
7	ncbi_113808676	Ctdp1	0.740170093	0.260267472	1.507861829	1.32E-52	3.53E-48	Ctdp1	PREDICTED: RNA polymerase II subunit A C-terminal domain phosphatase [Nicrophorus vespilloides]	-	-	-	-	-	-	-
7	ncbi_113822742	ncbi_113822742	3.905706879	2.358409001	0.727769744	9.84E-50	2.64E-45	--	-	-	-	-	-	-	-	-
7	ncbi_113819668	ncbi_113819668	2.151564776	1.037517787	1.052250206	7.30E-49	1.95E-44	--	-	-	-	-	-	-	-	-
7	ncbi_113802238	ncbi_113802238	3.042122831	1.901449939	0.677978449	1.12E-48	3.01E-44	--	-	-	-	-	-	-	-	-
7	ncbi_113828082	dnc	0.579823862	0.171513831	1.757289783	1.41E-48	3.79E-44	dnc	PREDICTED: cAMP-specific 3',5'-cyclic phosphodiesterase, isoform F isoform X4 [Diachasma alloeum]	Metabolism;Environmental Information Processing;Organismal Systems;Human Diseases	Nucleotide metabolism;Signal transduction;Endocrine system;Substance dependence	ko00230//Purine metabolism;ko04024//cAMP signaling pathway;ko04928//Parathyroid hormone synthesis, secretion and action;ko05032//Morphine addiction	K13293;K13293;K13293;K13293	-	-	-
7	ncbi_113824421	Galphao	3.927270108	2.409879108	0.704566051	1.82E-48	4.87E-44	Galphao	GTP binding protein alpha subunit Go [Marsupenaeus japonicus]	Environmental Information Processing;Organismal Systems;Human Diseases;Organismal Systems;Organismal Systems;Human Diseases;Human Diseases;Organismal Systems;Organismal Systems;Organismal Systems;Organismal Systems;Organismal Systems;Organismal Systems;Organismal Systems;Organismal Systems;Human Diseases;Organismal Systems;Human Diseases	Signal transduction;Endocrine system;Substance dependence;Nervous system;Endocrine system;Infectious diseases;Infectious diseases;Nervous system;Nervous system;Nervous system;Nervous system;Endocrine system;Endocrine system;Nervous system;Environmental adaptation;Substance dependence;Nervous system;Infectious diseases	ko04015//Rap1 signaling pathway;ko04921//Oxytocin signaling pathway;ko05034//Alcoholism;ko04723//Retrograde endocannabinoid signaling;ko04926//Relaxin signaling pathway;ko05163//Human cytomegalovirus infection;ko05145//Toxoplasmosis;ko04726//Serotonergic synapse;ko04724//Glutamatergic synapse;ko04725//Cholinergic synapse;ko04728//Dopaminergic synapse;ko04915//Estrogen signaling pathway;ko04916//M…	K04534;K04534;K04534;K04534;K04534;K04534;K04534;K04534;K04534;K04534;K04534;K04534;K04534;K04534;K04534;K04534;K04534;K04534	-	GO:0017076//purine nucleotide binding;GO:0017111//nucleoside-triphosphatase activity;GO:0032403//protein complex binding;GO:0032550//purine ribonucleoside binding;GO:0043169//cation binding;GO:0060089//molecular transducer activity	GO:0007187//G-protein coupled receptor signaling pathway, coupled to cyclic nucleotide second messenger
7	ncbi_113803667	serpinb1	3.501588173	1.742116241	1.007168527	2.26E-48	6.06E-44	serpinb1	serine proteinase inhibitor [Litopenaeus vannamei]	Human Diseases	Infectious diseases	ko05146//Amoebiasis	K13963	-	-	-
7	ncbi_113817519	ncbi_113817519	0.730221527	0.301909212	1.274219423	4.18E-48	1.12E-43	--	-	-	-	-	-	-	-	-
7	ncbi_113815035	ITA	2.591684629	1.296046628	0.999772551	6.77E-48	1.81E-43	ITA	inhibitor of apoptosis protein [Litopenaeus vannamei]	Human Diseases;Cellular Processes;Cellular Processes;Environmental Information Processing;Genetic Information Processing;Human Diseases;Cellular Processes;Human Diseases;Human Diseases;Organismal Systems;Human Diseases;Environmental Information Processing;Cellular Processes;Organismal Systems;Environmental Information Processing	Cancers;Cellular community - eukaryotes;Cell growth and death;Signal transduction;Folding, sorting and degradation;Cancers;Cell growth and death;Drug resistance;Infectious diseases;Immune system;Cancers;Signal transduction;Cell growth and death;Immune system;Signal transduction	ko05200//Pathways in cancer;ko04510//Focal adhesion;ko04210//Apoptosis;ko04390//Hippo signaling pathway;ko04120//Ubiquitin mediated proteolysis;ko05202//Transcriptional misregulation in cancers;ko04217//Necroptosis;ko01524//Platinum drug resistance;ko05145//Toxoplasmosis;ko04621//NOD-like receptor signaling pathway;ko05222//Small cell lung cancer;ko04668//TNF signaling pathway;ko04215//Apoptosis …	K16060;K16060;K16060;K16060;K16060;K16060;K16060;K16060;K16060;K16060;K16060;K16060;K16060;K16060;K16060	-	-	-
7	ncbi_113809284	ncbi_113809284	1.319527962	0.606019328	1.12258621	1.70E-47	4.55E-43	--	-	-	-	-	-	-	-	-
7	ncbi_113816540	ncbi_113816540	0.900944787	0.362914588	1.311808646	3.30E-47	8.83E-43	--	PREDICTED: uncharacterized protein LOC108682462 [Hyalella azteca]	-	-	-	-	-	-	-
7	ncbi_113821534	ncbi_113821534	10.95885052	7.899449068	0.472272537	3.80E-47	1.02E-42	--	-	-	-	-	-	-	-	-
7	ncbi_113811220	RAC1	5.833093351	4.051408778	0.525837506	4.60E-46	1.23E-41	RAC1	Ras-related C3 botulinum toxin substrate 1 [Fenneropenaeus chinensis]	Human Diseases;Cellular Processes;Human Diseases;Cellular Processes;Environmental Information Processing;Cellular Processes;Cellular Processes;Environmental Information Processing;Human Diseases;Environmental Information Processing;Cellular Processes;Human Diseases;Human Diseases;Human Diseases;Human Diseases;Environmental Information Processing;Organismal Systems;Environmental Information Proces…	Cancers;Cellular community - eukaryotes;Cancers;Transport and catabolism;Signal transduction;Cell motility;Cellular community - eukaryotes;Signal transduction;Cancers;Signal transduction;Cellular community - eukaryotes;Cardiovascular diseases;Infectious diseases;Infectious diseases;Infectious diseases;Signal transduction;Digestive system;Signal transduction;Cancers;Cardiovascular diseases;Signal …	ko05200//Pathways in cancer;ko04510//Focal adhesion;ko05205//Proteoglycans in cancer;ko04145//Phagosome;ko04151//PI3K-Akt signaling pathway;ko04810//Regulation of actin cytoskeleton;ko04530//Tight junction;ko04015//Rap1 signaling pathway;ko05231//Choline metabolism in cancer;ko04013//MAPK signaling pathway - fly;ko04520//Adherens junction;ko05418//Fluid shear stress and atherosclerosis;ko05131//S…	K04392;K04392;K04392;K04392;K04392;K04392;K04392;K04392;K04392;K04392;K04392;K04392;K04392;K04392;K04392;K04392;K04392;K04392;K04392;K04392;K04392;K04392;K04392;K04392;K04392;K04392;K04392;K04392;K04392;K04392;K04392;K04392;K04392;K04392;K04392;K04392;K04392;K04392;K04392;K04392;K04392;K04392;K04392	-	-	-
7	ncbi_113827852	SULT1C4	8.138085198	5.226110085	0.63895187	6.27E-46	1.68E-41	SULT1C4	Sulfotransferase sult [Daphnia magna]	-	-	-	-	-	-	-
7	ncbi_113819336	Rffl	0.60011776	0.206251275	1.540842587	6.36E-46	1.70E-41	Rffl	PREDICTED: E3 ubiquitin-protein ligase RNF34 isoform X2 [Harpegnathos saltator]	-	-	-	-	-	-	-
7	ncbi_113805399	WBP2	2.100656114	1.239733284	0.760810233	8.82E-44	2.36E-39	WBP2	WW domain-binding protein 2 [Lepeophtheirus salmonis]	-	-	-	-	-	-	-
7	ncbi_113805238	Drice	3.602663078	2.307444232	0.642767957	1.35E-43	3.62E-39	Drice	CAP-3 [Litopenaeus vannamei]	Human Diseases;Cellular Processes;Human Diseases;Cellular Processes;Human Diseases;Environmental Information Processing;Cellular Processes;Human Diseases;Human Diseases	Cancers;Cell growth and death;Neurodegenerative diseases;Cell growth and death;Endocrine and metabolic diseases;Signal transduction;Cell growth and death;Infectious diseases;Infectious diseases	ko05200//Pathways in cancer;ko04210//Apoptosis;ko05010//Alzheimer disease;ko04214//Apoptosis - fly;ko04932//Non-alcoholic fatty liver disease (NAFLD);ko04668//TNF signaling pathway;ko04215//Apoptosis - multiple species;ko05134//Legionellosis;ko05133//Pertussis	K04397;K04397;K04397;K04397;K04397;K04397;K04397;K04397;K04397	-	-	-
7	ncbi_113806139	Parp14	1.774282186	0.932591041	0.927919001	1.78E-43	4.78E-39	Parp14	PREDICTED: poly [ADP-ribose] polymerase 12-like [Ictalurus punctatus]	-	-	-	-	-	-	-
7	ncbi_113826664	ncbi_113826664	1.158890109	0.559297328	1.051056426	1.86E-43	4.98E-39	--	-	-	-	-	-	-	-	-
7	ncbi_113800094	Cpvl	1.430065513	0.67426311	1.084697667	4.61E-43	1.23E-38	Cpvl	PREDICTED: venom serine carboxypeptidase-like [Hyalella azteca]	-	-	-	-	-	-	-
7	ncbi_113801040	Gtf3c6	0.906739084	0.392553683	1.207797511	3.90E-42	1.04E-37	Gtf3c6	PREDICTED: general transcription factor 3C polypeptide 6 [Cimex lectularius]	-	-	-	-	-	-	-
7	ncbi_113813620	ncbi_113813620	0.948749242	0.363883123	1.382551688	6.36E-42	1.70E-37	--	NAD(P)H-dependent FMN reductase C4B3.06c [Orchesella cincta]	-	-	-	-	-	-	-
7	ncbi_113822831	ncbi_113822831	4.251803246	2.621806597	0.697513571	8.18E-42	2.19E-37	--	-	-	-	-	-	-	-	-
7	ncbi_113806131	Rel	2.117489198	1.139652556	0.893760551	1.30E-41	3.47E-37	Rel	relish [Litopenaeus vannamei]	Human Diseases;Human Diseases;Environmental Information Processing;Cellular Processes;Human Diseases;Human Diseases;Human Diseases;Human Diseases;Human Diseases;Human Diseases;Human Diseases;Environmental Information Processing;Environmental Information Processing;Human Diseases;Environmental Information Processing;Human Diseases;Human Diseases;Environmental Information Processing;Human Diseases;…	Cancers;Infectious diseases;Signal transduction;Cell growth and death;Infectious diseases;Infectious diseases;Cancers;Cardiovascular diseases;Infectious diseases;Cancers;Infectious diseases;Signal transduction;Signal transduction;Cancers;Signal transduction;Infectious diseases;Endocrine and metabolic diseases;Signal transduction;Infectious diseases;Immune system;Cell growth and death;Infectious d…	ko05200//Pathways in cancer;ko05165//Human papillomavirus infection;ko04151//PI3K-Akt signaling pathway;ko04210//Apoptosis;ko05164//Influenza A;ko05166//HTLV-I infection;ko05202//Transcriptional misregulation in cancers;ko05418//Fluid shear stress and atherosclerosis;ko05131//Shigellosis;ko05206//MicroRNAs in cancer;ko05132//Salmonella infection;ko04010//MAPK signaling pathway;ko04024//cAMP signa…	K02580;K02580;K02580;K02580;K02580;K02580;K02580;K02580;K02580;K02580;K02580;K02580;K02580;K02580;K02580;K02580;K02580;K02580;K02580;K02580;K02580;K02580;K02580;K02580;K02580;K02580;K02580;K02580;K02580;K02580;K02580;K02580;K02580;K02580;K02580;K02580;K02580;K02580;K02580;K02580;K02580;K02580;K02580;K02580;K02580;K02580;K02580;K02580;K02580;K02580;K02580;K02580;K02580;K02580;K02580;K02580;K02580;…	-	-	-
7	ncbi_113821163	loco	1.023985571	0.473844999	1.111708269	3.24E-41	8.69E-37	loco	PREDICTED: regulator of G-protein signaling loco-like [Limulus polyphemus]	-	-	-	-	-	-	GO:0050789//regulation of biological process
7	ncbi_113810935	Arhgap20	0.797123147	0.333964788	1.255106623	3.97E-41	1.06E-36	Arhgap20	Rho GTPase-activating protein 20 [Trachymyrmex septentrionalis]	-	-	-	-	-	-	-
7	ncbi_113827071	PFDN6	4.207870625	2.798752961	0.588306199	5.88E-41	1.58E-36	PFDN6	PREDICTED: prefoldin subunit 6-like [Hyalella azteca]	-	-	-	-	-	-	-
7	ncbi_113817105	Crk	1.443820185	0.647739716	1.156404969	9.38E-41	2.51E-36	Crk	PREDICTED: adapter molecule Crk-like isoform X1 [Apis dorsata]	-	-	-	-	-	-	-
7	ncbi_113827978	ncbi_113827978	3.882322654	2.408974428	0.688500944	2.06E-40	5.53E-36	--	hypothetical protein [Nyssomyia neivai]	-	-	-	-	-	-	-
7	ncbi_113807226	Saraf	2.299723734	1.341638943	0.77746409	1.29E-39	3.46E-35	Saraf	Store-operated calcium entry-associated regulatory factor [Daphnia magna]	-	-	-	-	GO:0016020//membrane	-	GO:0006810//transport
7	ncbi_113802901	ncbi_113802901	0.949867697	0.443524243	1.098713618	2.57E-39	6.87E-35	--	-	-	-	-	-	-	-	-
7	ncbi_113820486	sgg	4.578823745	2.960849366	0.628965937	7.31E-39	1.96E-34	sgg	glycogen synthase kinase 3 beta [Macrobrachium nipponense]	Human Diseases;Human Diseases;Cellular Processes;Environmental Information Processing;Human Diseases;Organismal Systems;Environmental Information Processing;Human Diseases;Human Diseases;Environmental Information Processing;Human Diseases;Human Diseases;Human Diseases;Human Diseases;Cellular Processes;Organismal Systems;Environmental Information Processing;Human Diseases;Organismal Systems;Human …	Cancers;Infectious diseases;Cellular community - eukaryotes;Signal transduction;Cancers;Endocrine system;Signal transduction;Infectious diseases;Infectious diseases;Signal transduction;Neurodegenerative diseases;Infectious diseases;Endocrine and metabolic diseases;Endocrine and metabolic diseases;Cell growth and death;Endocrine system;Signal transduction;Cancers;Immune system;Cancers;Infectious d…	ko05200//Pathways in cancer;ko05165//Human papillomavirus infection;ko04510//Focal adhesion;ko04151//PI3K-Akt signaling pathway;ko05225//Hepatocellular carcinoma;ko04919//Thyroid hormone signaling pathway;ko04390//Hippo signaling pathway;ko05164//Influenza A;ko05166//HTLV-I infection;ko04150//mTOR signaling pathway;ko05010//Alzheimer disease;ko05169//Epstein-Barr virus infection;ko04932//Non-alco…	K03083;K03083;K03083;K03083;K03083;K03083;K03083;K03083;K03083;K03083;K03083;K03083;K03083;K03083;K03083;K03083;K03083;K03083;K03083;K03083;K03083;K03083;K03083;K03083;K03083;K03083;K03083;K03083;K03083;K03083;K03083;K03083;K03083;K03083;K03083;K03083;K03083;K03083;K03083;K03083;K03083;K03083;K03083	-	-	-
7	ncbi_113819182	ncbi_113819182	1.898048998	1.143923696	0.730526413	1.84E-38	4.94E-34	--	-	-	-	-	-	-	-	-
7	ncbi_113829126	GRINA	0.590751543	0.237107975	1.317007306	6.45E-38	1.73E-33	GRINA	PREDICTED: protein lifeguard 1-like [Hyalella azteca]	-	-	-	-	-	-	-
7	ncbi_113801846	Best3	0.567494743	0.206507098	1.458415658	1.41E-37	3.78E-33	Best3	PREDICTED: bestrophin-2-like isoform X3 [Halyomorpha halys]	-	-	-	-	-	-	-
7	ncbi_113818994	stambpa	0.872970971	0.381419488	1.194555123	2.13E-37	5.70E-33	stambpa	STAM-binding protein-like [Zootermopsis nevadensis]	Cellular Processes	Transport and catabolism	ko04144//Endocytosis	K11866	-	-	-
7	ncbi_113821673	Ide	1.224765036	0.585720386	1.064220988	3.79E-37	1.01E-32	Ide	PREDICTED: insulin-degrading enzyme-like [Priapulus caudatus]	Human Diseases	Neurodegenerative diseases	ko05010//Alzheimer disease	K01408	-	GO:0003824//catalytic activity	-
7	ncbi_113804226	ncbi_113804226	4.539519148	3.102564576	0.549078248	4.25E-37	1.14E-32	--	PREDICTED: CKLF-like MARVEL transmembrane domain-containing protein 4 [Hyalella azteca]	-	-	-	-	-	-	-
7	ncbi_113811831	F46B6.12	0.606972494	0.258499311	1.231470707	6.04E-37	1.62E-32	F46B6.12	PREDICTED: UPF0587 protein C1orf123 homolog [Hyalella azteca]	-	-	-	-	-	-	-
7	ncbi_113812801	ncbi_113812801	0.538415502	0.222021213	1.278022427	1.09E-36	2.93E-32	--	PREDICTED: uncharacterized protein LOC108666010 [Hyalella azteca]	-	-	-	-	-	-	-
7	ncbi_113826777	Syx5	1.473166046	0.767922285	0.939887829	1.44E-36	3.86E-32	Syx5	PREDICTED: syntaxin-5-like [Hyalella azteca]	Genetic Information Processing	Folding, sorting and degradation	ko04130//SNARE interactions in vesicular transport	K08490	-	-	-
7	ncbi_113820330	Pcd	7.378904635	5.182226632	0.509834561	3.22E-36	8.63E-32	Pcd	pterin 4alpha-carbinolamine dehydratase [Drosophila virilis]	Metabolism;Metabolism	Global and overview maps;Metabolism of cofactors and vitamins	ko01100//Metabolic pathways;ko00790//Folate biosynthesis	K01724;K01724	-	-	-
7	ncbi_113817213	crebl2	1.771668467	1.131047555	0.647449068	6.10E-36	1.63E-31	crebl2	PREDICTED: cAMP-responsive element-binding protein-like 2 [Bombus terrestris]	-	-	-	-	-	-	-
7	ncbi_113804421	ARHGAP17	0.55190494	0.212915731	1.374137258	1.65E-35	4.42E-31	ARHGAP17	PREDICTED: rho GTPase-activating protein 44-like [Hyalella azteca]	Cellular Processes	Cellular community - eukaryotes	ko04530//Tight junction	K20638	-	-	-
7	ncbi_113827891	ncbi_113827891	7.022976844	5.219695951	0.428116906	2.90E-35	7.76E-31	--	PREDICTED: DAZ-associated protein 2-like [Neodiprion lecontei]	-	-	-	-	-	-	-
7	ncbi_113808972	ncbi_113808972	1.090672231	0.364542491	1.581058718	4.98E-35	1.33E-30	--	-	-	-	-	-	-	-	-
7	ncbi_113815498	RAB7A	1.727413828	0.974789122	0.825451687	7.18E-35	1.92E-30	RAB7A	WSSV receptor Rab7, partial [Penaeus monodon]	Cellular Processes;Cellular Processes;Human Diseases;Cellular Processes;Human Diseases;Human Diseases;Cellular Processes	Transport and catabolism;Transport and catabolism;Infectious diseases;Transport and catabolism;Infectious diseases;Infectious diseases;Transport and catabolism	ko04145//Phagosome;ko04144//Endocytosis;ko05132//Salmonella infection;ko04140//Autophagy - animal;ko05152//Tuberculosis;ko05146//Amoebiasis;ko04137//Mitophagy - animal	K07897;K07897;K07897;K07897;K07897;K07897;K07897	-	GO:0032550//purine ribonucleoside binding	GO:0008104//protein localization;GO:0035556//intracellular signal transduction
7	ncbi_113800785	dicer1	0.824802985	0.342656499	1.267286505	1.24E-34	3.31E-30	dicer1	dicer 2 [Litopenaeus vannamei]	Human Diseases	Cancers	ko05206//MicroRNAs in cancer	K11592	-	-	-
7	ncbi_113808348	Lamp1	1.781316492	0.872106663	1.030367368	4.29E-34	1.15E-29	Lamp1	PREDICTED: lysosome-associated membrane glycoprotein 1-like [Hyalella azteca]	Cellular Processes;Cellular Processes;Cellular Processes;Human Diseases	Transport and catabolism;Transport and catabolism;Transport and catabolism;Infectious diseases	ko04145//Phagosome;ko04142//Lysosome;ko04140//Autophagy - animal;ko05152//Tuberculosis	K06528;K06528;K06528;K06528	-	-	-
7	ncbi_113817101	ncbi_113817101	1.334504445	0.713181208	0.903963515	6.66E-34	1.78E-29	--	-	-	-	-	-	-	-	-
7	ncbi_113803583	ncbi_113803583	3.126702041	1.90314029	0.71625983	1.83E-33	4.91E-29	--	PREDICTED: myotubularin-related protein DDB_G0290005-like isoform X4 [Hyalella azteca]	-	-	-	-	-	-	-
7	ncbi_113823237	ncbi_113823237	2.307632129	1.446761226	0.673586417	4.53E-33	1.21E-28	--	PREDICTED: ragulator complex protein LAMTOR5 [Anoplophora glabripennis]	Environmental Information Processing;Human Diseases	Signal transduction;Infectious diseases	ko04150//mTOR signaling pathway;ko05161//Hepatitis B	K16344;K16344	-	-	GO:0009987//cellular process
7	ncbi_113815677	ADAP1	0.741586064	0.332039824	1.159257849	9.78E-33	2.62E-28	ADAP1	centaurin-alpha 1-like protein [Marsupenaeus japonicus]	-	-	-	-	-	-	-
7	ncbi_113820365	Rho1	5.698058025	4.178456661	0.447500141	1.18E-32	3.17E-28	Rho1	RhoA [Marsupenaeus japonicus]	Human Diseases;Cellular Processes;Human Diseases;Cellular Processes;Cellular Processes;Cellular Processes;Environmental Information Processing;Organismal Systems;Cellular Processes;Organismal Systems;Human Diseases;Environmental Information Processing;Human Diseases;Human Diseases;Human Diseases;Organismal Systems;Environmental Information Processing;Environmental Information Processing;Human Dis…	Cancers;Cellular community - eukaryotes;Cancers;Cell motility;Cellular community - eukaryotes;Transport and catabolism;Signal transduction;Immune system;Cellular community - eukaryotes;Endocrine system;Cardiovascular diseases;Signal transduction;Infectious diseases;Cancers;Infectious diseases;Digestive system;Signal transduction;Signal transduction;Cancers;Signal transduction;Immune system;Signal…	ko05200//Pathways in cancer;ko04510//Focal adhesion;ko05205//Proteoglycans in cancer;ko04810//Regulation of actin cytoskeleton;ko04530//Tight junction;ko04144//Endocytosis;ko04015//Rap1 signaling pathway;ko04611//Platelet activation;ko04520//Adherens junction;ko04921//Oxytocin signaling pathway;ko05418//Fluid shear stress and atherosclerosis;ko04150//mTOR signaling pathway;ko05130//Pathogenic Esc…	K04513;K04513;K04513;K04513;K04513;K04513;K04513;K04513;K04513;K04513;K04513;K04513;K04513;K04513;K04513;K04513;K04513;K04513;K04513;K04513;K04513;K04513;K04513;K04513;K04513;K04513;K04513;K04513;K04513;K04513;K04513;K04513;K04513;K04513;K04513;K04513;K04513	-	-	-
7	ncbi_113808363	Tmem50a	2.675477825	1.82327256	0.553266326	2.03E-32	5.43E-28	Tmem50a	PREDICTED: transmembrane protein 50A [Oreochromis niloticus]	-	-	-	-	-	-	-
7	ncbi_113807880	CYTH1	0.772012927	0.349047456	1.145201808	2.16E-32	5.79E-28	CYTH1	PREDICTED: cytohesin-1-like isoform X3 [Hyalella azteca]	Cellular Processes;Environmental Information Processing	Transport and catabolism;Signal transduction	ko04144//Endocytosis;ko04072//Phospholipase D signaling pathway	K18441;K18441	-	-	-
7	ncbi_113828234	ncbi_113828234	1.694289521	0.929539583	0.866092219	2.44E-32	6.54E-28	--	PREDICTED: carbohydrate sulfotransferase 1-like [Hyalella azteca]	-	-	-	-	-	-	-
7	ncbi_113828236	Csnk1g3	0.956424246	0.511253695	0.903611338	3.61E-32	9.67E-28	Csnk1g3	PREDICTED: casein kinase I-like isoform X2 [Hyalella azteca]	Environmental Information Processing;Environmental Information Processing	Signal transduction;Signal transduction	ko04340//Hedgehog signaling pathway;ko04341//Hedgehog signaling pathway - fly	K08958;K08958	-	-	-
7	ncbi_113827695	ncbi_113827695	0.552949895	0.252897553	1.128595679	4.75E-32	1.27E-27	--	sodium-potassium ATPase beta [Cherax cainii]	Organismal Systems;Organismal Systems;Environmental Information Processing;Organismal Systems;Environmental Information Processing;Organismal Systems;Organismal Systems;Organismal Systems;Organismal Systems;Organismal Systems;Organismal Systems;Organismal Systems;Organismal Systems;Organismal Systems;Organismal Systems;Organismal Systems;Organismal Systems;Organismal Systems	Endocrine system;Digestive system;Signal transduction;Circulatory system;Signal transduction;Digestive system;Digestive system;Circulatory system;Digestive system;Digestive system;Endocrine system;Endocrine system;Endocrine system;Digestive system;Excretory system;Excretory system;Digestive system;Excretory system	ko04919//Thyroid hormone signaling pathway;ko04972//Pancreatic secretion;ko04022//cGMP - PKG signaling pathway;ko04261//Adrenergic signaling in cardiomyocytes;ko04024//cAMP signaling pathway;ko04971//Gastric acid secretion;ko04974//Protein digestion and absorption;ko04260//Cardiac muscle contraction;ko04976//Bile secretion;ko04970//Salivary secretion;ko04911//Insulin secretion;ko04918//Thyroid ho…	K01540;K01540;K01540;K01540;K01540;K01540;K01540;K01540;K01540;K01540;K01540;K01540;K01540;K01540;K01540;K01540;K01540;K01540	-	-	GO:0044699//single-organism process
7	ncbi_113827328	PFDN4	4.616063028	3.31414611	0.478025715	1.08E-31	2.90E-27	PFDN4	PREDICTED: prefoldin subunit 4-like [Hyalella azteca]	-	-	-	-	-	-	-
7	ncbi_113802465	TMEM189	1.25758939	0.703221356	0.838610162	1.31E-31	3.50E-27	TMEM189	PREDICTED: transmembrane protein 189-like [Hyalella azteca]	-	-	-	-	-	-	-
7	ncbi_113805307	SYP	0.638767803	0.272524308	1.22890668	4.75E-31	1.27E-26	SYP	PREDICTED: synaptophysin-like [Hyalella azteca]	-	-	-	-	GO:0031410//cytoplasmic vesicle;GO:0044425//membrane part;GO:0044456//synapse part	GO:0005515//protein binding;GO:0032934//sterol binding	GO:0006810//transport;GO:0048168//regulation of neuronal synaptic plasticity
7	ncbi_113820190	Sptlc2	2.500984522	1.7059669	0.551906474	6.86E-31	1.84E-26	Sptlc2	PREDICTED: serine palmitoyltransferase 2-like isoform X2 [Hyalella azteca]	Metabolism;Environmental Information Processing;Metabolism	Global and overview maps;Signal transduction;Lipid metabolism	ko01100//Metabolic pathways;ko04071//Sphingolipid signaling pathway;ko00600//Sphingolipid metabolism	K00654;K00654;K00654	-	-	-
7	ncbi_113813063	ncbi_113813063	7.504221813	4.006623149	0.905315652	6.98E-31	1.87E-26	--	PREDICTED: uncharacterized protein LOC108679670 [Hyalella azteca]	-	-	-	-	-	-	-
7	ncbi_113811362	Tspan33	0.751762525	0.364220343	1.045465497	8.65E-31	2.32E-26	Tspan33	PREDICTED: tetraspanin-33-like [Hyalella azteca]	-	-	-	-	-	-	-
7	ncbi_113807315	IscW_ISCW007295	1.938793974	1.20003409	0.692084113	1.59E-30	4.26E-26	IscW_ISCW007295	PREDICTED: 1,2-dihydroxy-3-keto-5-methylthiopentene dioxygenase-like [Papilio machaon]	Metabolism;Metabolism	Global and overview maps;Amino acid metabolism	ko01100//Metabolic pathways;ko00270//Cysteine and methionine metabolism	K08967;K08967	GO:0043231//intracellular membrane-bounded organelle	GO:0016702//oxidoreductase activity, acting on single donors with incorporation of molecular oxygen, incorporation of two atoms of oxygen;GO:0043169//cation binding	GO:0071267//L-methionine salvage
7	ncbi_113806538	hts	0.532240693	0.233260023	1.190139745	2.68E-30	7.18E-26	hts	PREDICTED: protein hu-li tai shao-like [Hyalella azteca]	-	-	-	-	-	-	-
7	ncbi_113811267	GRINA	1.028252276	0.480251866	1.098331142	4.23E-30	1.13E-25	GRINA	PREDICTED: protein lifeguard 1-like isoform X2 [Hyalella azteca]	-	-	-	-	-	-	-
7	ncbi_113816763	TIE1	0.672523582	0.298228733	1.173165594	4.28E-30	1.14E-25	TIE1	PREDICTED: angiopoietin-1 receptor [Anolis carolinensis]	Cellular Processes;Organismal Systems;Human Diseases;Environmental Information Processing	Cellular community - eukaryotes;Endocrine system;Endocrine and metabolic diseases;Signaling molecules and interaction	ko04520//Adherens junction;ko04910//Insulin signaling pathway;ko04931//Insulin resistance;ko04514//Cell adhesion molecules (CAMs)	K05695;K05695;K05695;K05695	GO:0044425//membrane part;GO:0044464//cell part	GO:0016772//transferase activity, transferring phosphorus-containing groups	GO:0001525//angiogenesis;GO:0006468//protein phosphorylation;GO:0007155//cell adhesion;GO:0048522//positive regulation of cellular process;GO:0048584//positive regulation of response to stimulus;GO:0051239//regulation of multicellular organismal process;GO:1902531//regulation of intracellular signal transduction
7	ncbi_113808858	Ubl3	0.851247424	0.437460922	0.960424381	5.00E-30	1.34E-25	Ubl3	PREDICTED: ubiquitin-like protein 3 [Hyalella azteca]	-	-	-	-	-	-	-
7	ncbi_113817495	chmp2a	3.509359158	2.473032357	0.504926489	1.60E-29	4.28E-25	chmp2a	Charged multivesicular body protein 2a [Orchesella cincta]	Cellular Processes;Cellular Processes	Transport and catabolism;Cell growth and death	ko04144//Endocytosis;ko04217//Necroptosis	K12191;K12191	-	-	-
7	ncbi_113823401	ncbi_113823401	1.169847913	0.636773012	0.877469885	3.49E-29	9.34E-25	--	PREDICTED: tropomyosin, smooth muscle/fibroblast CTM1-like [Aedes albopictus]	-	-	-	-	-	-	-
7	ncbi_113814327	ncbi_113814327	0.939004698	0.493731291	0.927406295	4.91E-29	1.32E-24	--	rgs-3, partial [Pristionchus pacificus]	-	-	-	-	-	-	-
7	ncbi_113806643	SPR	0.953889144	0.462745239	1.043603466	6.00E-29	1.61E-24	SPR	PREDICTED: sepiapterin reductase-like [Hyalella azteca]	Metabolism;Metabolism	Global and overview maps;Metabolism of cofactors and vitamins	ko01100//Metabolic pathways;ko00790//Folate biosynthesis	K00072;K00072	-	-	GO:0006725//cellular aromatic compound metabolic process;GO:0044699//single-organism process;GO:0046483//heterocycle metabolic process;GO:1901360//organic cyclic compound metabolic process;GO:1901564//organonitrogen compound metabolic process
7	ncbi_113812323	AAEL006169	4.274328417	2.867784614	0.575761087	1.91E-28	5.11E-24	AAEL006169	cathepsin D [Penaeus monodon]	Cellular Processes;Cellular Processes;Cellular Processes;Environmental Information Processing;Human Diseases;Organismal Systems	Transport and catabolism;Cell growth and death;Transport and catabolism;Signal transduction;Infectious diseases;Endocrine system	ko04142//Lysosome;ko04210//Apoptosis;ko04140//Autophagy - animal;ko04071//Sphingolipid signaling pathway;ko05152//Tuberculosis;ko04915//Estrogen signaling pathway	K01379;K01379;K01379;K01379;K01379;K01379	-	GO:0016787//hydrolase activity	GO:0019538//protein metabolic process
7	ncbi_113815925	Eif4ebp1	1.105779621	0.625794983	0.821301892	2.51E-28	6.72E-24	Eif4ebp1	eukaryotic initiation factor 4E binding protein [Marsupenaeus japonicus]	Genetic Information Processing;Organismal Systems	Translation;Aging	ko03013//RNA transport;ko04213//Longevity regulating pathway - multiple species	K18644;K18644	-	-	-
7	ncbi_113807387	Sirt2	0.959508785	0.523916433	0.872959302	2.88E-28	7.72E-24	Sirt2	NAD-dependent deacetylase sirtuin-2 [Zootermopsis nevadensis]	-	-	-	-	-	GO:0000166//nucleotide binding;GO:0043167//ion binding	-
7	ncbi_113817412	ncbi_113817412	2.530052968	1.666537011	0.602314231	6.26E-28	1.68E-23	--	-	-	-	-	-	-	-	-
7	ncbi_113819145	TMEM59	1.439514327	0.86272002	0.738617808	1.16E-27	3.12E-23	TMEM59	PREDICTED: transmembrane protein 59-like [Branchiostoma belcheri]	-	-	-	-	-	-	-
7	ncbi_113803987	pnt	5.203442655	3.955342588	0.395663784	1.42E-27	3.81E-23	pnt	PREDICTED: protein c-ets-1-A-like [Agrilus planipennis]	Human Diseases;Environmental Information Processing;Human Diseases;Environmental Information Processing;Cellular Processes;Organismal Systems;Human Diseases	Cancers;Signal transduction;Infectious diseases;Signal transduction;Cell growth and death;Development;Cancers	ko05200//Pathways in cancer;ko04013//MAPK signaling pathway - fly;ko05166//HTLV-I infection;ko04014//Ras signaling pathway;ko04218//Cellular senescence;ko04320//Dorso-ventral axis formation;ko05211//Renal cell carcinoma	K02678;K02678;K02678;K02678;K02678;K02678;K02678	-	-	-
7	ncbi_113802017	sbds	1.002197528	0.510683173	0.972666456	1.54E-27	4.12E-23	sbds	PREDICTED: ribosome maturation protein SBDS [Maylandia zebra]	Genetic Information Processing	Translation	ko03008//Ribosome biogenesis in eukaryotes	K14574	-	-	-
7	ncbi_113817397	DNAJC7	1.150298809	0.607540144	0.92095703	7.24E-27	1.94E-22	DNAJC7	PREDICTED: dnaJ homolog subfamily C member 7-like isoform X3 [Hyalella azteca]	-	-	-	-	-	-	-
7	ncbi_113818371	ncbi_113818371	0.674185388	0.322305444	1.064716804	2.39E-26	6.40E-22	--	PREDICTED: uncharacterized protein LOC108665326 isoform X1 [Hyalella azteca]	-	-	-	-	-	-	-
7	ncbi_113802309	CG9132	0.813297069	0.388894838	1.06440233	4.26E-26	1.14E-21	CG9132	PREDICTED: NECAP-like protein CG9132 [Habropoda laboriosa]	-	-	-	-	-	-	-
7	ncbi_113826644	smim15	1.121311387	0.627666551	0.837116737	8.51E-26	2.28E-21	smim15	PREDICTED: small integral membrane protein 15-like [Hyalella azteca]	-	-	-	-	-	-	-
7	ncbi_113803568	Ptp4a1	2.724107012	1.952960539	0.48012058	1.01E-25	2.70E-21	Ptp4a1	PREDICTED: protein tyrosine phosphatase type IVA 1 [Orussus abietinus]	-	-	-	-	-	GO:0004721//phosphoprotein phosphatase activity	GO:0006796//phosphate-containing compound metabolic process
7	ncbi_113817273	ncbi_113817273	0.874010648	0.445042271	0.973708483	2.88E-25	7.72E-21	--	-	-	-	-	-	-	-	-
7	ncbi_113812538	ncbi_113812538	2.267673093	1.465975104	0.629352073	3.62E-25	9.71E-21	--	death-associated protein-like [Penaeus monodon]	-	-	-	-	-	-	-
7	ncbi_113828108	ncbi_113828108	0.658382781	0.347415467	0.922264619	4.88E-25	1.31E-20	--	-	-	-	-	-	-	-	-
7	ncbi_113822328	Bm1_04115	2.470243567	1.734165024	0.510412106	5.00E-25	1.34E-20	Bm1_04115	Short coiled-coil protein-like protein [Zootermopsis nevadensis]	-	-	-	-	-	-	-
7	ncbi_113822957	QPCT	0.554861481	0.232939502	1.252172338	8.86E-25	2.37E-20	QPCT	PREDICTED: glutaminyl-peptide cyclotransferase isoform X1 [Tursiops truncatus]	-	-	-	-	-	GO:0016740//transferase activity	-
7	ncbi_113812701	PGP	0.601265862	0.26967099	1.156802716	1.08E-24	2.89E-20	PGP	PREDICTED: glycerol-3-phosphate phosphatase-like [Hyalella azteca]	Metabolism;Metabolism;Metabolism	Global and overview maps;Global and overview maps;Carbohydrate metabolism	ko01100//Metabolic pathways;ko01200//Carbon metabolism;ko00630//Glyoxylate and dicarboxylate metabolism	K19269;K19269;K19269	-	-	-
7	ncbi_113811236	Pum2	0.644221303	0.306810874	1.070206754	1.32E-24	3.55E-20	Pum2	PREDICTED: pumilio homolog 2-like [Hyalella azteca]	-	-	-	-	-	-	-
7	ncbi_113801894	RIOK3	1.207951463	0.711211476	0.764211978	1.44E-24	3.87E-20	RIOK3	Serine/threonine-protein kinase RIO3 [Daphnia magna]	-	-	-	-	-	GO:0016772//transferase activity, transferring phosphorus-containing groups	-
7	ncbi_113823958	DUPD1	0.563563196	0.275493468	1.032559287	1.87E-24	5.01E-20	DUPD1	PREDICTED: inactive dual specificity phosphatase 27-like isoform X1 [Hyalella azteca]	-	-	-	-	-	GO:0016787//hydrolase activity	GO:0016311//dephosphorylation
7	ncbi_113810916	ncbi_113810916	1.003273546	0.520290595	0.947325481	7.73E-24	2.07E-19	--	PREDICTED: delta(7)-sterol 5(6)-desaturase erg32-like isoform X1 [Hyalella azteca]	-	-	-	-	-	-	-
7	ncbi_113829963	Spred2	0.603876591	0.293280392	1.04197313	7.89E-24	2.11E-19	Spred2	PREDICTED: sprouty-related, EVH1 domain-containing protein 2-like isoform X2 [Parasteatoda tepidariorum]	-	-	-	-	-	-	-
7	ncbi_113813238	G-s-alpha-60A	1.899295321	1.302559026	0.544115497	2.44E-23	6.55E-19	G-s-alpha-60A	G protein s alpha subunit [Litopenaeus vannamei]	Human Diseases;Organismal Systems;Human Diseases;Environmental Information Processing;Human Diseases;Organismal Systems;Organismal Systems;Organismal Systems;Human Diseases;Organismal Systems;Environmental Information Processing;Human Diseases;Human Diseases;Organismal Systems;Environmental Information Processing;Environmental Information Processing;Organismal Systems;Human Diseases;Organismal Sy…	Cancers;Environmental adaptation;Infectious diseases;Signal transduction;Cardiovascular diseases;Immune system;Endocrine system;Digestive system;Substance dependence;Circulatory system;Signal transduction;Infectious diseases;Endocrine and metabolic diseases;Digestive system;Signal transduction;Signal transduction;Endocrine system;Infectious diseases;Circulatory system;Nervous system;Infectious di…	ko05200//Pathways in cancer;ko04714//Thermogenesis;ko05165//Human papillomavirus infection;ko04015//Rap1 signaling pathway;ko05414//Dilated cardiomyopathy (DCM);ko04611//Platelet activation;ko04921//Oxytocin signaling pathway;ko04972//Pancreatic secretion;ko05034//Alcoholism;ko04261//Adrenergic signaling in cardiomyocytes;ko04024//cAMP signaling pathway;ko05110//Vibrio cholerae infection;ko04934/…	K04632;K04632;K04632;K04632;K04632;K04632;K04632;K04632;K04632;K04632;K04632;K04632;K04632;K04632;K04632;K04632;K04632;K04632;K04632;K04632;K04632;K04632;K04632;K04632;K04632;K04632;K04632;K04632;K04632;K04632;K04632;K04632;K04632;K04632;K04632;K04632;K04632;K04632;K04632;K04632;K04632;K04632;K04632;K04632;K04632;K04632;K04632;K04632	-	GO:0017076//purine nucleotide binding;GO:0017111//nucleoside-triphosphatase activity;GO:0032403//protein complex binding;GO:0032550//purine ribonucleoside binding;GO:0060089//molecular transducer activity	GO:0007166//cell surface receptor signaling pathway
7	ncbi_113816684	GPx	4.783724923	2.662200943	0.845514963	3.09E-23	8.28E-19	GPx	Glutathione peroxidase 6 [Zootermopsis nevadensis]	Human Diseases;Metabolism;Organismal Systems;Metabolism;Human Diseases	Neurodegenerative diseases;Metabolism of other amino acids;Endocrine system;Lipid metabolism;Neurodegenerative diseases	ko05016//Huntington disease;ko00480//Glutathione metabolism;ko04918//Thyroid hormone synthesis;ko00590//Arachidonic acid metabolism;ko05014//Amyotrophic lateral sclerosis (ALS)	K00432;K00432;K00432;K00432;K00432	-	GO:0016491//oxidoreductase activity	-
7	ncbi_113805681	TRAPPC6B	1.240318176	0.753724303	0.718601443	3.20E-23	8.56E-19	TRAPPC6B	PREDICTED: trafficking protein particle complex subunit 6B-like [Hyalella azteca]	-	-	-	-	-	-	-
7	ncbi_113807184	chmp1	1.674362522	1.016744492	0.719654749	4.38E-23	1.17E-18	chmp1	Charged multivesicular body protein 1b [Zootermopsis nevadensis]	Cellular Processes;Cellular Processes	Transport and catabolism;Cell growth and death	ko04144//Endocytosis;ko04217//Necroptosis	K12197;K12197	-	-	-
7	ncbi_113804936	SINHCAF	1.689791591	1.051096428	0.684950295	5.09E-23	1.36E-18	SINHCAF	PREDICTED: LOW QUALITY PROTEIN: protein FAM60A [Linepithema humile]	-	-	-	-	-	-	-
7	ncbi_113812399	PDCD4	0.59326452	0.28837104	1.040749216	5.49E-23	1.47E-18	PDCD4	PREDICTED: programmed cell death protein 4-like [Hyalella azteca]	-	-	-	-	-	-	-
7	ncbi_113819147	Vps4b	2.891269622	2.127869209	0.442293675	7.54E-23	2.02E-18	Vps4b	PREDICTED: vacuolar protein sorting-associated protein 4A-like [Hyalella azteca]	Cellular Processes;Cellular Processes	Transport and catabolism;Cell growth and death	ko04144//Endocytosis;ko04217//Necroptosis	K12196;K12196	-	-	-
7	ncbi_113817375	POLR2H	1.517912367	0.952634491	0.672093813	8.53E-23	2.28E-18	POLR2H	PREDICTED: DNA-directed RNA polymerases I, II, and III subunit RPABC3-like [Hyalella azteca]	Metabolism;Human Diseases;Metabolism;Human Diseases;Metabolism;Genetic Information Processing;Organismal Systems	Global and overview maps;Neurodegenerative diseases;Nucleotide metabolism;Infectious diseases;Nucleotide metabolism;Transcription;Immune system	ko01100//Metabolic pathways;ko05016//Huntington disease;ko00230//Purine metabolism;ko05169//Epstein-Barr virus infection;ko00240//Pyrimidine metabolism;ko03020//RNA polymerase;ko04623//Cytosolic DNA-sensing pathway	K03016;K03016;K03016;K03016;K03016;K03016;K03016	-	-	-
7	ncbi_113816372	dda1	1.461176154	0.930192812	0.651528418	9.47E-23	2.53E-18	dda1	PREDICTED: DET1- and DDB1-associated protein 1 [Athalia rosae]	-	-	-	-	-	-	-
7	ncbi_113808173	CTSB	1.395752386	0.725817605	0.943364067	9.50E-23	2.54E-18	CTSB	cathepsin B [Litopenaeus vannamei]	Cellular Processes;Cellular Processes;Cellular Processes;Organismal Systems;Organismal Systems;Organismal Systems	Transport and catabolism;Cell growth and death;Transport and catabolism;Immune system;Endocrine system;Immune system	ko04142//Lysosome;ko04210//Apoptosis;ko04140//Autophagy - animal;ko04621//NOD-like receptor signaling pathway;ko04924//Renin secretion;ko04612//Antigen processing and presentation	K01363;K01363;K01363;K01363;K01363;K01363	-	GO:0008233//peptidase activity	GO:0008152//metabolic process
7	ncbi_113816361	ncbi_113816361	1.068600737	0.648910307	0.719631931	9.61E-23	2.57E-18	--	-	-	-	-	-	-	-	-
7	ncbi_113806070	ncbi_113806070	0.831237177	0.383846198	1.114731824	1.01E-22	2.72E-18	--	mitogen-activated protein kinase kinase 3 [Fenneropenaeus chinensis]	-	-	-	-	-	-	-
7	ncbi_113802700	TACC3	0.802581121	0.449230589	0.837191054	1.04E-22	2.78E-18	TACC3	PREDICTED: transforming acidic coiled-coil-containing protein 2-like [Hyalella azteca]	-	-	-	-	-	-	-
7	ncbi_113814090	ncbi_113814090	1.543490585	1.012105737	0.608836664	1.06E-22	2.84E-18	--	-	-	-	-	-	-	-	-
7	ncbi_113827001	Ptpn9	0.573236874	0.269979422	1.08628197	1.24E-22	3.32E-18	Ptpn9	PREDICTED: tyrosine-protein phosphatase non-receptor type 9-like isoform X1 [Hyalella azteca]	-	-	-	-	-	-	-
7	ncbi_113816434	CMPK	1.343136329	0.777739428	0.788246961	1.68E-22	4.51E-18	CMPK	PREDICTED: UMP-CMP kinase-like [Hyalella azteca]	Metabolism;Metabolism;Metabolism	Global and overview maps;Xenobiotics biodegradation and metabolism;Nucleotide metabolism	ko01100//Metabolic pathways;ko00983//Drug metabolism - other enzymes;ko00240//Pyrimidine metabolism	K13800;K13800;K13800	-	-	-
7	ncbi_113820333	ARF6	0.844812993	0.456348338	0.888496546	2.06E-22	5.51E-18	ARF6	PREDICTED: ADP-ribosylation factor 6 [Harpegnathos saltator]	Cellular Processes;Environmental Information Processing;Environmental Information Processing;Organismal Systems	Transport and catabolism;Signal transduction;Signal transduction;Immune system	ko04144//Endocytosis;ko04014//Ras signaling pathway;ko04072//Phospholipase D signaling pathway;ko04666//Fc gamma R-mediated phagocytosis	K07941;K07941;K07941;K07941	GO:0005924//cell-substrate adherens junction;GO:0010008//endosome membrane;GO:0016023//cytoplasmic, membrane-bounded vesicle;GO:0031252//cell leading edge;GO:0031253//cell projection membrane	GO:0019899//enzyme binding;GO:0032550//purine ribonucleoside binding	GO:0006810//transport;GO:0030010//establishment of cell polarity;GO:0030833//regulation of actin filament polymerization;GO:0033365//protein localization to organelle;GO:0046578//regulation of Ras protein signal transduction;GO:0050773//regulation of dendrite development;GO:0051130//positive regulation of cellular component organization;GO:0060491//regulation of cell projection assembly;GO:190401…
7	ncbi_113812037	ncbi_113812037	0.868142576	0.393124338	1.142946315	3.31E-22	8.86E-18	--	PREDICTED: SCO-spondin-like [Branchiostoma belcheri]	-	-	-	-	GO:0016020//membrane	GO:0005515//protein binding	GO:0050789//regulation of biological process
7	ncbi_113829491	PTEN	1.074348783	0.622525663	0.787257218	3.90E-22	1.04E-17	PTEN	PREDICTED: phosphatidylinositol 3,4,5-trisphosphate 3-phosphatase and dual-specificity protein phosphatase PTEN isoform X3 [Apis cerana]	Metabolism;Human Diseases;Human Diseases;Cellular Processes;Environmental Information Processing;Human Diseases;Environmental Information Processing;Human Diseases;Cellular Processes;Environmental Information Processing;Human Diseases;Environmental Information Processing;Cellular Processes;Organismal Systems;Metabolism;Human Diseases;Human Diseases;Human Diseases;Environmental Information Process…	Global and overview maps;Cancers;Infectious diseases;Cellular community - eukaryotes;Signal transduction;Cancers;Signal transduction;Cancers;Transport and catabolism;Signal transduction;Cancers;Signal transduction;Cell growth and death;Aging;Carbohydrate metabolism;Cancers;Endocrine and metabolic diseases;Cancers;Signal transduction;Infectious diseases;Cancers;Drug resistance;Cancers;Cancers;Cell…	ko01100//Metabolic pathways;ko05200//Pathways in cancer;ko05165//Human papillomavirus infection;ko04510//Focal adhesion;ko04151//PI3K-Akt signaling pathway;ko05225//Hepatocellular carcinoma;ko04150//mTOR signaling pathway;ko05206//MicroRNAs in cancer;ko04140//Autophagy - animal;ko04071//Sphingolipid signaling pathway;ko05224//Breast cancer;ko04068//FoxO signaling pathway;ko04218//Cellular senesce…	K01110;K01110;K01110;K01110;K01110;K01110;K01110;K01110;K01110;K01110;K01110;K01110;K01110;K01110;K01110;K01110;K01110;K01110;K01110;K01110;K01110;K01110;K01110;K01110;K01110;K01110	-	-	GO:0016311//dephosphorylation
7	ncbi_113829394	Plekhf2	0.924060972	0.482267968	0.938153058	4.01E-22	1.07E-17	Plekhf2	PREDICTED: pleckstrin homology domain-containing family F member 2 [Anoplophora glabripennis]	-	-	-	-	-	-	-
7	ncbi_113827709	BTBD2	0.667095708	0.380796067	0.808875182	8.54E-22	2.29E-17	BTBD2	BTB/POZ domain-containing protein 2 [Zootermopsis nevadensis]	-	-	-	-	-	-	-
7	ncbi_113803512	RAB35	1.549802627	1.047296289	0.565414844	8.84E-22	2.37E-17	RAB35	PREDICTED: ras-related protein Rab-35 [Agrilus planipennis]	Cellular Processes	Transport and catabolism	ko04144//Endocytosis	K07876	-	GO:0004620//phospholipase activity;GO:0016790//thiolester hydrolase activity;GO:0032550//purine ribonucleoside binding	GO:0008104//protein localization;GO:0035556//intracellular signal transduction
7	ncbi_113821234	ncbi_113821234	1.284392341	0.793332582	0.69508826	1.01E-21	2.70E-17	--	RhoA activator C11orf59-like protein [Zootermopsis nevadensis]	Environmental Information Processing	Signal transduction	ko04150//mTOR signaling pathway	K20397	-	-	-
7	ncbi_113804330	hdc	0.701841834	0.383122907	0.873338658	1.07E-21	2.87E-17	hdc	PREDICTED: headcase protein-like [Hyalella azteca]	-	-	-	-	-	-	-
7	ncbi_113821749	Sqstm1	0.884277436	0.436126335	1.019752968	3.97E-21	1.06E-16	Sqstm1	PREDICTED: sequestosome-1 [Neodiprion lecontei]	Human Diseases;Cellular Processes;Cellular Processes;Cellular Processes;Organismal Systems	Cardiovascular diseases;Cell growth and death;Cell growth and death;Transport and catabolism;Development	ko05418//Fluid shear stress and atherosclerosis;ko04217//Necroptosis;ko04218//Cellular senescence;ko04137//Mitophagy - animal;ko04380//Osteoclast differentiation	K14381;K14381;K14381;K14381;K14381	-	-	-
7	ncbi_113825117	VPS37B	0.903786067	0.512386046	0.81875013	8.25E-21	2.21E-16	VPS37B	PREDICTED: vacuolar protein sorting-associated protein 37B-like [Hyalella azteca]	Cellular Processes	Transport and catabolism	ko04144//Endocytosis	K12185	-	-	-
7	ncbi_113815356	ncbi_113815356	0.611695694	0.27341011	1.161747529	1.36E-20	3.65E-16	--	VWA domain CoxE-like protein [Tetrahymena thermophila SB210]	-	-	-	-	-	-	-
7	ncbi_113830322	mys	1.11691438	0.699467093	0.675190506	1.62E-20	4.34E-16	mys	integrin [Litopenaeus vannamei]	Human Diseases;Human Diseases;Cellular Processes;Human Diseases;Cellular Processes;Environmental Information Processing;Cellular Processes;Cellular Processes;Environmental Information Processing;Human Diseases;Human Diseases;Organismal Systems;Human Diseases;Human Diseases;Human Diseases;Organismal Systems;Human Diseases;Organismal Systems;Environmental Information Processing;Human Diseases;Human…	Cancers;Infectious diseases;Cellular community - eukaryotes;Cancers;Transport and catabolism;Signal transduction;Cell motility;Cellular community - eukaryotes;Signal transduction;Cardiovascular diseases;Cardiovascular diseases;Immune system;Infectious diseases;Infectious diseases;Infectious diseases;Immune system;Cardiovascular diseases;Development;Signaling molecules and interaction;Infectious d…	ko05200//Pathways in cancer;ko05165//Human papillomavirus infection;ko04510//Focal adhesion;ko05205//Proteoglycans in cancer;ko04145//Phagosome;ko04151//PI3K-Akt signaling pathway;ko04810//Regulation of actin cytoskeleton;ko04530//Tight junction;ko04015//Rap1 signaling pathway;ko05410//Hypertrophic cardiomyopathy (HCM);ko05414//Dilated cardiomyopathy (DCM);ko04611//Platelet activation;ko05130//Pa…	K05719;K05719;K05719;K05719;K05719;K05719;K05719;K05719;K05719;K05719;K05719;K05719;K05719;K05719;K05719;K05719;K05719;K05719;K05719;K05719;K05719;K05719;K05719;K05719	-	-	-
7	ncbi_113826008	ncbi_113826008	1.953345493	1.22649019	0.671411451	1.75E-20	4.70E-16	--	-	-	-	-	-	-	-	-
7	ncbi_113803882	ogfod2	0.842913478	0.451166769	0.901723741	1.00E-19	2.69E-15	ogfod2	PREDICTED: 2-oxoglutarate and iron-dependent oxygenase domain-containing protein 2-like [Lingula anatina]	-	-	-	-	-	GO:0016491//oxidoreductase activity	-
7	ncbi_113829333	CDK17	0.700305476	0.431332092	0.69918531	3.44E-19	9.20E-15	CDK17	PREDICTED: cyclin-dependent kinase 17-like isoform X2 [Lingula anatina]	-	-	-	-	-	GO:0004672//protein kinase activity;GO:0032550//purine ribonucleoside binding	GO:0006464//cellular protein modification process
7	ncbi_113829543	ncbi_113829543	1.917798984	1.43371789	0.419690335	5.37E-19	1.44E-14	--	-	-	-	-	-	-	-	-
7	ncbi_113828689	Uba1	0.782441765	0.487047461	0.683921016	6.44E-19	1.73E-14	Uba1	ubiquitin-activating enzyme E1 [Penaeus monodon]	Genetic Information Processing;Human Diseases	Folding, sorting and degradation;Neurodegenerative diseases	ko04120//Ubiquitin mediated proteolysis;ko05012//Parkinson disease	K03178;K03178	-	GO:0016877//ligase activity, forming carbon-sulfur bonds;GO:0032550//purine ribonucleoside binding	GO:0036211//protein modification process
7	ncbi_113818920	RFX7	0.733732941	0.385377033	0.928984464	7.75E-19	2.07E-14	RFX7	DNA-binding protein RFX7 [Zootermopsis nevadensis]	-	-	-	-	-	-	-
7	ncbi_113813444	RAB11FIP5	0.568469612	0.288015863	0.980934957	8.05E-19	2.16E-14	RAB11FIP5	PREDICTED: rab11 family-interacting protein 1-like isoform X2 [Hyalella azteca]	Cellular Processes	Transport and catabolism	ko04144//Endocytosis	K12484	-	-	-
7	ncbi_113829090	eff	2.169466159	1.515194965	0.51783664	9.16E-19	2.45E-14	eff	ubiquitin-conjugating enzyme H5b [Litopenaeus vannamei]	Genetic Information Processing;Environmental Information Processing;Genetic Information Processing;Human Diseases;Organismal Systems	Folding, sorting and degradation;Signal transduction;Folding, sorting and degradation;Infectious diseases;Immune system	ko04141//Protein processing in endoplasmic reticulum;ko04013//MAPK signaling pathway - fly;ko04120//Ubiquitin mediated proteolysis;ko05131//Shigellosis;ko04624//Toll and Imd signaling pathway	K06689;K06689;K06689;K06689;K06689	-	GO:0003824//catalytic activity	-
7	ncbi_113799939	SERPINB1	2.531119181	1.868906763	0.437580844	1.05E-18	2.82E-14	SERPINB1	serine proteinase inhibitor-3 [Eriocheir sinensis]	Human Diseases	Infectious diseases	ko05146//Amoebiasis	K13963	-	-	-
7	ncbi_113828091	UCHL3	2.039996969	1.364702537	0.579980486	1.08E-18	2.89E-14	UCHL3	ubiquitin carboxyl-terminal esterase L3 [Penaeus monodon]	-	-	-	-	-	GO:0070011//peptidase activity, acting on L-amino acid peptides	GO:0006508//proteolysis;GO:0009987//cellular process
7	ncbi_113807989	Dnajb2	0.78965857	0.367153099	1.104847222	1.32E-18	3.54E-14	Dnajb2	PREDICTED: dnaJ homolog subfamily B member 6 isoform X2 [Agrilus planipennis]	-	-	-	-	-	-	-
7	ncbi_113827271	rpa1	0.606676981	0.327700957	0.888548688	1.37E-18	3.68E-14	rpa1	PREDICTED: replication protein A 70 kDa DNA-binding subunit-like isoform X1 [Hyalella azteca]	Genetic Information Processing;Genetic Information Processing;Genetic Information Processing;Genetic Information Processing;Genetic Information Processing	Replication and repair;Replication and repair;Replication and repair;Replication and repair;Replication and repair	ko03460//Fanconi anemia pathway;ko03420//Nucleotide excision repair;ko03440//Homologous recombination;ko03030//DNA replication;ko03430//Mismatch repair	K07466;K07466;K07466;K07466;K07466	GO:0000228//nuclear chromosome	GO:0003677//DNA binding	GO:0006281//DNA repair;GO:0044707//single-multicellular organism process
7	ncbi_113827372	ncbi_113827372	6.286864307	4.721290369	0.41315941	2.11E-18	5.66E-14	--	NADH dehydrogenase, partial [Procambarus clarkii]	Metabolism;Organismal Systems;Human Diseases;Human Diseases;Human Diseases;Human Diseases;Metabolism;Organismal Systems	Global and overview maps;Environmental adaptation;Neurodegenerative diseases;Neurodegenerative diseases;Endocrine and metabolic diseases;Neurodegenerative diseases;Energy metabolism;Nervous system	ko01100//Metabolic pathways;ko04714//Thermogenesis;ko05016//Huntington disease;ko05010//Alzheimer disease;ko04932//Non-alcoholic fatty liver disease (NAFLD);ko05012//Parkinson disease;ko00190//Oxidative phosphorylation;ko04723//Retrograde endocannabinoid signaling	K03948;K03948;K03948;K03948;K03948;K03948;K03948;K03948	-	-	-
7	ncbi_113817688	PTPN11	0.673603826	0.40548912	0.732237129	2.55E-18	6.82E-14	PTPN11	PREDICTED: tyrosine-protein phosphatase non-receptor type 11-like isoform X2 [Parasteatoda tepidariorum]	Human Diseases;Environmental Information Processing;Environmental Information Processing;Organismal Systems;Environmental Information Processing;Human Diseases;Organismal Systems;Organismal Systems;Human Diseases;Human Diseases;Human Diseases;Human Diseases;Organismal Systems;Organismal Systems;Organismal Systems;Environmental Information Processing	Cancers;Signal transduction;Signal transduction;Immune system;Signal transduction;Infectious diseases;Development;Nervous system;Endocrine and metabolic diseases;Cancers;Cancers;Infectious diseases;Immune system;Immune system;Endocrine system;Signal transduction	ko05205//Proteoglycans in cancer;ko04013//MAPK signaling pathway - fly;ko04014//Ras signaling pathway;ko04670//Leukocyte transendothelial migration;ko04072//Phospholipase D signaling pathway;ko05168//Herpes simplex infection;ko04360//Axon guidance;ko04722//Neurotrophin signaling pathway;ko04931//Insulin resistance;ko05211//Renal cell carcinoma;ko05220//Chronic myeloid leukemia;ko05120//Epithelial…	K07293;K07293;K07293;K07293;K07293;K07293;K07293;K07293;K07293;K07293;K07293;K07293;K07293;K07293;K07293;K07293	-	GO:0016787//hydrolase activity	GO:0016311//dephosphorylation
7	ncbi_113828542	ncbi_113828542	0.705436832	0.40733071	0.792316314	4.37E-18	1.17E-13	--	PREDICTED: LOW QUALITY PROTEIN: major facilitator superfamily domain-containing protein 6-like protein B [Branchiostoma belcheri]	-	-	-	-	-	-	-
7	ncbi_113818132	ncbi_113818132	0.60702701	0.328341297	0.886564496	4.83E-18	1.29E-13	--	-	-	-	-	-	-	-	-
7	ncbi_113801961	Vps28	0.774214182	0.452929128	0.773447412	5.50E-18	1.47E-13	Vps28	PREDICTED: vacuolar protein sorting-associated protein 28 homolog [Hyalella azteca]	Cellular Processes	Transport and catabolism	ko04144//Endocytosis	K12184	-	-	-
7	ncbi_113809723	LEPROTL1	0.715368721	0.40234459	0.830255403	5.68E-18	1.52E-13	LEPROTL1	leptin receptor protein [Eriocheir sinensis]	-	-	-	-	-	-	-
7	ncbi_113819612	ncbi_113819612	2.381532178	1.860322534	0.356337271	7.91E-18	2.12E-13	--	-	-	-	-	-	-	-	-
7	ncbi_113820643	ncbi_113820643	3.095244462	2.215579784	0.482369078	1.18E-17	3.15E-13	--	-	-	-	-	-	-	-	-
7	ncbi_113813518	Dock2	3.530984626	2.708727606	0.382455219	1.28E-17	3.42E-13	Dock2	PREDICTED: dedicator of cytokinesis protein 1 [Neodiprion lecontei]	Cellular Processes;Cellular Processes;Human Diseases;Human Diseases	Cellular community - eukaryotes;Cell motility;Infectious diseases;Infectious diseases	ko04510//Focal adhesion;ko04810//Regulation of actin cytoskeleton;ko05131//Shigellosis;ko05100//Bacterial invasion of epithelial cells	K13708;K13708;K13708;K13708	-	-	-
7	ncbi_113823602	Khc	1.301491956	0.898105833	0.535209028	1.41E-17	3.79E-13	Khc	PREDICTED: kinesin heavy chain [Aedes albopictus]	Cellular Processes;Organismal Systems	Transport and catabolism;Nervous system	ko04144//Endocytosis;ko04728//Dopaminergic synapse	K10396;K10396	-	-	-
7	ncbi_113826980	ncbi_113826980	0.902121282	0.579495026	0.638525125	5.10E-17	1.37E-12	--	-	-	-	-	-	-	-	-
7	ncbi_113801050	gnb5a	1.48119215	1.084507081	0.449719336	6.33E-17	1.70E-12	gnb5a	PREDICTED: guanine nucleotide-binding protein subunit beta-2-like [Limulus polyphemus]	Human Diseases;Environmental Information Processing;Human Diseases;Environmental Information Processing;Organismal Systems;Organismal Systems;Organismal Systems;Human Diseases;Organismal Systems;Organismal Systems;Organismal Systems;Organismal Systems;Environmental Information Processing;Organismal Systems;Human Diseases;Organismal Systems;Human Diseases	Cancers;Signal transduction;Substance dependence;Signal transduction;Immune system;Nervous system;Endocrine system;Infectious diseases;Nervous system;Nervous system;Nervous system;Nervous system;Signal transduction;Nervous system;Infectious diseases;Environmental adaptation;Substance dependence	ko05200//Pathways in cancer;ko04151//PI3K-Akt signaling pathway;ko05034//Alcoholism;ko04014//Ras signaling pathway;ko04062//Chemokine signaling pathway;ko04723//Retrograde endocannabinoid signaling;ko04926//Relaxin signaling pathway;ko05163//Human cytomegalovirus infection;ko04726//Serotonergic synapse;ko04724//Glutamatergic synapse;ko04725//Cholinergic synapse;ko04728//Dopaminergic synapse;ko043…	K04539;K04539;K04539;K04539;K04539;K04539;K04539;K04539;K04539;K04539;K04539;K04539;K04539;K04539;K04539;K04539;K04539	-	GO:0016740//transferase activity	GO:0016570//histone modification
7	ncbi_113822000	etfrf1	0.770859684	0.421966952	0.869338263	6.82E-17	1.83E-12	etfrf1	PREDICTED: LYR motif-containing protein 5 [Nanorana parkeri]	-	-	-	-	-	-	-
7	ncbi_113800533	CtBP	1.667661542	1.179928984	0.499126487	7.59E-17	2.03E-12	CtBP	C-terminal-binding protein [Litopenaeus vannamei]	Human Diseases;Environmental Information Processing;Human Diseases;Environmental Information Processing	Cancers;Signal transduction;Cancers;Signal transduction	ko05200//Pathways in cancer;ko04310//Wnt signaling pathway;ko05220//Chronic myeloid leukemia;ko04330//Notch signaling pathway	K04496;K04496;K04496;K04496	-	GO:0000166//nucleotide binding;GO:0016614//oxidoreductase activity, acting on CH-OH group of donors	GO:0044710//single-organism metabolic process
7	ncbi_113804225	ncbi_113804225	0.861340763	0.545459624	0.659111699	8.26E-17	2.21E-12	--	PREDICTED: CKLF-like MARVEL transmembrane domain-containing protein 4 [Hyalella azteca]	-	-	-	-	-	-	-
7	ncbi_113811160	ncbi_113811160	0.668688929	0.35751438	0.903333961	1.26E-16	3.38E-12	--	PREDICTED: uncharacterized protein LOC108680484 isoform X1 [Hyalella azteca]	-	-	-	-	-	-	-
7	ncbi_113800191	ncbi_113800191	1.041957827	0.738442435	0.49673952	1.66E-16	4.43E-12	--	-	-	-	-	-	-	-	-
7	ncbi_113830092	Ttc9c	0.637130069	0.332319339	0.939017672	1.86E-16	4.98E-12	Ttc9c	PREDICTED: tetratricopeptide repeat protein 9C-like [Lingula anatina]	-	-	-	-	-	-	-
7	ncbi_113808971	eef1akmt1	0.775499451	0.46378459	0.741670875	2.44E-16	6.53E-12	eef1akmt1	Lysine N-methyltransferase N6AMT2 [Daphnia magna]	-	-	-	-	-	GO:0016740//transferase activity	-
7	ncbi_113809995	WDR44	0.634146678	0.380291207	0.737711991	2.61E-16	6.98E-12	WDR44	PREDICTED: WD repeat-containing protein 44 [Orussus abietinus]	-	-	-	-	-	-	-
7	ncbi_113801962	NUDC	1.285011152	0.933720054	0.460718906	2.92E-16	7.82E-12	NUDC	PREDICTED: nuclear migration protein nudC [Macaca fascicularis]	-	-	-	-	-	-	-
7	ncbi_113813834	TP63	0.774673602	0.403800626	0.939945432	3.17E-16	8.49E-12	TP63	p53 [Litopenaeus vannamei]	Human Diseases;Environmental Information Processing;Cellular Processes	Cancers;Signal transduction;Cell growth and death	ko05206//MicroRNAs in cancer;ko04391//Hippo signaling pathway -fly;ko04214//Apoptosis - fly	K10149;K10149;K10149	-	-	-
7	ncbi_113804806	ALOX5	0.523230979	0.283217481	0.885537646	7.65E-16	2.05E-11	ALOX5	lipoxygenase [Penaeus monodon]	Metabolism;Human Diseases;Organismal Systems;Metabolism;Organismal Systems;Organismal Systems	Global and overview maps;Infectious diseases;Nervous system;Lipid metabolism;Endocrine system;Immune system	ko01100//Metabolic pathways;ko05145//Toxoplasmosis;ko04726//Serotonergic synapse;ko00590//Arachidonic acid metabolism;ko04913//Ovarian Steroidogenesis;ko04664//Fc epsilon RI signaling pathway	K00461;K00461;K00461;K00461;K00461;K00461	-	-	-
7	ncbi_113827838	Pka-C1	0.727885718	0.450468859	0.692284583	7.95E-16	2.13E-11	Pka-C1	Aurora kinase B [Daphnia magna]	Human Diseases;Organismal Systems;Human Diseases;Human Diseases;Cellular Processes;Organismal Systems;Human Diseases;Organismal Systems;Human Diseases;Organismal Systems;Environmental Information Processing;Organismal Systems;Human Diseases;Organismal Systems;Environmental Information Processing;Human Diseases;Environmental Information Processing;Human Diseases;Cellular Processes;Human Diseases;H…	Cancers;Environmental adaptation;Infectious diseases;Cancers;Cellular community - eukaryotes;Endocrine system;Cardiovascular diseases;Immune system;Infectious diseases;Endocrine system;Signal transduction;Aging;Substance dependence;Circulatory system;Signal transduction;Cancers;Signal transduction;Infectious diseases;Transport and catabolism;Infectious diseases;Endocrine and metabolic diseases;Di…	ko05200//Pathways in cancer;ko04714//Thermogenesis;ko05165//Human papillomavirus infection;ko05205//Proteoglycans in cancer;ko04530//Tight junction;ko04919//Thyroid hormone signaling pathway;ko05414//Dilated cardiomyopathy (DCM);ko04611//Platelet activation;ko05166//HTLV-I infection;ko04921//Oxytocin signaling pathway;ko04010//MAPK signaling pathway;ko04213//Longevity regulating pathway - multipl…	K04345;K04345;K04345;K04345;K04345;K04345;K04345;K04345;K04345;K04345;K04345;K04345;K04345;K04345;K04345;K04345;K04345;K04345;K04345;K04345;K04345;K04345;K04345;K04345;K04345;K04345;K04345;K04345;K04345;K04345;K04345;K04345;K04345;K04345;K04345;K04345;K04345;K04345;K04345;K04345;K04345;K04345;K04345;K04345;K04345;K04345;K04345;K04345;K04345;K04345;K04345;K04345;K04345;K04345;K04345;K04345;K04345;…	-	GO:0004672//protein kinase activity;GO:0032550//purine ribonucleoside binding	GO:0006464//cellular protein modification process;GO:0006796//phosphate-containing compound metabolic process
7	ncbi_113814003	ncbi_113814003	0.676323563	0.417768823	0.695008786	1.19E-15	3.19E-11	--	PREDICTED: histone-lysine N-methyltransferase 2D-like [Hyalella azteca]	-	-	-	-	-	-	-
7	ncbi_113803640	lamtor3	1.173599588	0.779755584	0.589846386	2.55E-15	6.82E-11	lamtor3	MAPK kinase 1 interacting protein 1 [Penaeus monodon]	Environmental Information Processing;Environmental Information Processing	Signal transduction;Signal transduction	ko04150//mTOR signaling pathway;ko04010//MAPK signaling pathway	K04370;K04370	GO:0016020//membrane;GO:0043234//protein complex	GO:0005515//protein binding	GO:0008104//protein localization;GO:0032006//regulation of TOR signaling;GO:0043087//regulation of GTPase activity;GO:0043200//response to amino acid
7	ncbi_113829686	ncbi_113829686	1.317183295	0.90754166	0.537420345	2.59E-15	6.94E-11	--	-	-	-	-	-	-	-	-
7	ncbi_113814753	ncbi_113814753	0.517259018	0.299675774	0.787484434	3.51E-15	9.41E-11	--	PREDICTED: sericin 1-like [Hyalella azteca]	-	-	-	-	-	-	-
7	ncbi_113810241	csnk1a1	3.495354453	2.721609893	0.360978472	5.00E-15	1.34E-10	csnk1a1	PREDICTED: casein kinase I [Hyalella azteca]	Human Diseases;Human Diseases;Environmental Information Processing;Human Diseases;Human Diseases;Environmental Information Processing;Environmental Information Processing	Infectious diseases;Cancers;Signal transduction;Cancers;Cancers;Signal transduction;Signal transduction	ko05165//Human papillomavirus infection;ko05225//Hepatocellular carcinoma;ko04310//Wnt signaling pathway;ko05224//Breast cancer;ko05226//Gastric cancer;ko04340//Hedgehog signaling pathway;ko04341//Hedgehog signaling pathway - fly	K08957;K08957;K08957;K08957;K08957;K08957;K08957	-	-	-
7	ncbi_113822739	KDM5A	1.11382888	0.787332057	0.500483481	6.16E-15	1.65E-10	KDM5A	PREDICTED: lysine-specific demethylase lid isoform X1 [Ceratina calcarata]	-	-	-	-	-	-	-
7	ncbi_113824981	fam167a	1.034688665	0.703097807	0.557399429	7.50E-15	2.01E-10	fam167a	PREDICTED: protein FAM167A-like [Branchiostoma belcheri]	-	-	-	-	-	-	-
7	ncbi_113806443	ZFAND6	1.531480701	1.084017865	0.498538654	1.33E-14	3.55E-10	ZFAND6	PREDICTED: AN1-type zinc finger protein 6 [Neodiprion lecontei]	-	-	-	-	-	-	-
7	ncbi_113800359	Mob3	0.734915751	0.44108737	0.736514421	1.38E-14	3.71E-10	Mob3	PREDICTED: MOB kinase activator-like 3 isoform X1 [Hyalella azteca]	-	-	-	-	-	-	-
7	ncbi_113807060	ATRX	0.720667662	0.459274195	0.649978386	3.84E-14	1.03E-09	ATRX	PREDICTED: transcriptional regulator ATRX-like [Hyalella azteca]	-	-	-	-	-	-	-
7	ncbi_113818993	dnph1	0.825812712	0.528286464	0.644494183	5.05E-14	1.35E-09	dnph1	PREDICTED: 2'-deoxynucleoside 5'-phosphate N-hydrolase 1-like [Amphimedon queenslandica]	-	-	-	-	-	GO:0016798//hydrolase activity, acting on glycosyl bonds	GO:0055086//nucleobase-containing small molecule metabolic process
7	ncbi_113810264	Arl1	1.194422419	0.811915957	0.556910846	9.84E-14	2.64E-09	Arl1	ADP-ribosylation factor protein 1, partial [Daphnia magna]	-	-	-	-	GO:0044464//cell part	GO:0032550//purine ribonucleoside binding	GO:0015031//protein transport;GO:0035556//intracellular signal transduction
7	ncbi_113814311	C16orf72	2.163550937	1.625395114	0.412610625	1.01E-13	2.71E-09	C16orf72	PREDICTED: UPF0472 protein C16orf72 homolog [Priapulus caudatus]	-	-	-	-	-	-	-
7	ncbi_113820470	ncbi_113820470	0.696683618	0.482315163	0.530527476	1.27E-13	3.41E-09	--	-	-	-	-	-	-	-	-
7	ncbi_113820224	Mmp16	2.363558398	1.66238651	0.507704659	2.53E-13	6.77E-09	Mmp16	PREDICTED: matrix metalloproteinase-14-like isoform X1 [Hyalella azteca]	Organismal Systems;Environmental Information Processing;Organismal Systems	Endocrine system;Signal transduction;Endocrine system	ko04928//Parathyroid hormone synthesis, secretion and action;ko04668//TNF signaling pathway;ko04912//GnRH signaling pathway	K07763;K07763;K07763	-	GO:0008233//peptidase activity;GO:0046872//metal ion binding	-
7	ncbi_113818191	ncbi_113818191	0.925558556	0.672612757	0.460548123	2.80E-13	7.51E-09	--	-	-	-	-	-	-	-	-
7	ncbi_113817808	POLR2E	1.679892528	1.18071797	0.508704539	2.89E-13	7.74E-09	POLR2E	PREDICTED: DNA-directed RNA polymerases I, II, and III subunit RPABC1-like [Hyalella azteca]	Metabolism;Human Diseases;Metabolism;Human Diseases;Metabolism;Genetic Information Processing;Organismal Systems	Global and overview maps;Neurodegenerative diseases;Nucleotide metabolism;Infectious diseases;Nucleotide metabolism;Transcription;Immune system	ko01100//Metabolic pathways;ko05016//Huntington disease;ko00230//Purine metabolism;ko05169//Epstein-Barr virus infection;ko00240//Pyrimidine metabolism;ko03020//RNA polymerase;ko04623//Cytosolic DNA-sensing pathway	K03013;K03013;K03013;K03013;K03013;K03013;K03013	GO:0043231//intracellular membrane-bounded organelle	GO:0034062//RNA polymerase activity	GO:0034645//cellular macromolecule biosynthetic process
7	ncbi_113808542	mid1ip1a	3.013993668	2.268044395	0.410227506	3.59E-13	9.61E-09	mid1ip1a	PREDICTED: myb-like protein A [Hyalella azteca]	-	-	-	-	-	-	-
7	ncbi_113823709	TIGD4	0.507010133	0.30998767	0.709803751	5.99E-13	1.60E-08	TIGD4	PREDICTED: tigger transposable element-derived protein 4 [Alligator sinensis]	-	-	-	-	-	-	-
7	ncbi_113803641	vps25	1.548324766	1.149596766	0.429580204	8.15E-13	2.18E-08	vps25	PREDICTED: vacuolar protein-sorting-associated protein 25-like [Hyalella azteca]	Cellular Processes	Transport and catabolism	ko04144//Endocytosis	K12189	-	-	-
7	ncbi_113824907	gata3	0.869331168	0.563295964	0.626012735	9.08E-13	2.43E-08	gata3	GATA-binding protein 6, partial [Microtus levis]	Organismal Systems;Organismal Systems;Organismal Systems;Human Diseases	Endocrine system;Immune system;Immune system;Immune diseases	ko04928//Parathyroid hormone synthesis, secretion and action;ko04658//Th1 and Th2 cell differentiation;ko04659//Th17 cell differentiation;ko05321//Inflammatiory bowel disease (IBD)	K17895;K17895;K17895;K17895	GO:0031981//nuclear lumen;GO:0044798//nuclear transcription factor complex	GO:0000977//RNA polymerase II regulatory region sequence-specific DNA binding;GO:0000981//RNA polymerase II transcription factor activity, sequence-specific DNA binding;GO:0003712//transcription cofactor activity;GO:0008134//transcription factor binding;GO:0046332//SMAD binding;GO:0046872//metal ion binding	GO:0001819//positive regulation of cytokine production;GO:0002065//columnar/cuboidal epithelial cell differentiation;GO:0003143//embryonic heart tube morphogenesis;GO:0003208//cardiac ventricle morphogenesis;GO:0006950//response to stress;GO:0007369//gastrulation;GO:0007599//hemostasis;GO:0008406//gonad development;GO:0009952//anterior/posterior pattern specification;GO:0014896//muscle hypertroph…
7	ncbi_113808529	ncbi_113808529	0.797744432	0.522807747	0.609646115	1.01E-12	2.72E-08	--	-	-	-	-	-	-	-	-
7	ncbi_113825119	HYPK	1.492363485	1.043757445	0.515812478	1.16E-12	3.10E-08	HYPK	PREDICTED: huntingtin-interacting protein K-like [Hyalella azteca]	-	-	-	-	GO:0044424//intracellular part	-	-
7	ncbi_113805521	eIF3-S8	1.478626764	1.111655313	0.411548406	1.21E-12	3.24E-08	eIF3-S8	PREDICTED: eukaryotic translation initiation factor 3 subunit C-like [Hyalella azteca]	Genetic Information Processing	Translation	ko03013//RNA transport	K03252	-	-	-
7	ncbi_113805092	ncbi_113805092	0.805946781	0.521572612	0.627816461	1.73E-12	4.64E-08	--	galectin [Litopenaeus vannamei]	-	-	-	-	-	-	-
7	ncbi_113816618	Ola1	2.478387374	1.930332248	0.360552514	1.82E-12	4.88E-08	Ola1	PREDICTED: obg-like ATPase 1 isoform X1 [Hyalella azteca]	-	-	-	-	-	GO:0016787//hydrolase activity;GO:0032550//purine ribonucleoside binding;GO:0043021//ribonucleoprotein complex binding	-
7	ncbi_113814259	ncbi_113814259	0.594463096	0.343454923	0.791466486	2.28E-12	6.09E-08	--	variable lymphocyte receptor diversity region, partial [Petromyzon marinus]	-	-	-	-	-	-	-
7	ncbi_113819781	Klc	1.423104044	1.046235623	0.443833344	2.62E-12	7.03E-08	Klc	PREDICTED: kinesin light chain-like isoform X2 [Hyalella azteca]	Human Diseases	Infectious diseases	ko05132//Salmonella infection	K10407	-	-	-
7	ncbi_113816300	NDFIP2	1.285006265	0.986585482	0.38125943	2.65E-12	7.10E-08	NDFIP2	PREDICTED: NEDD4 family-interacting protein 1-like [Hyalella azteca]	-	-	-	-	-	-	-
7	ncbi_113816166	Twf1	1.04781243	0.747820607	0.486616349	2.89E-12	7.75E-08	Twf1	PREDICTED: twinfilin [Aethina tumida]	-	-	-	-	-	-	-
7	ncbi_113805824	usp106	2.59623277	2.013761408	0.366526974	3.14E-12	8.42E-08	usp106	Putative RNA-binding protein Luc7-like 2 [Zootermopsis nevadensis]	-	-	-	-	-	-	-
7	ncbi_113802412	ncbi_113802412	1.897369975	1.304005701	0.541050845	3.46E-12	9.26E-08	--	PREDICTED: protein scylla-like [Hyalella azteca]	-	-	-	-	-	-	-
7	ncbi_113806326	ncbi_113806326	1.625643107	1.203439759	0.433846637	4.06E-12	1.09E-07	--	-	-	-	-	-	-	-	-
7	ncbi_113805392	myoI	0.77760853	0.49160084	0.661556664	4.18E-12	1.12E-07	myoI	PREDICTED: unconventional myosin-X isoform X3 [Polistes dominula]	-	-	-	-	GO:0005856//cytoskeleton	-	-
7	ncbi_113826862	Ltv1	0.715720128	0.482416492	0.569116324	6.20E-12	1.66E-07	Ltv1	PREDICTED: protein LTV1 homolog [Wasmannia auropunctata]	-	-	-	-	-	-	-
7	ncbi_113806985	rnf10	0.609856505	0.397077676	0.619048573	6.32E-12	1.69E-07	rnf10	PREDICTED: RING finger protein 10 [Agrilus planipennis]	-	-	-	-	-	-	-
7	ncbi_113800348	MRAS	0.826701527	0.527731898	0.647561363	6.37E-12	1.71E-07	MRAS	RAS-like protein, partial [Procambarus clarkii]	Human Diseases;Cellular Processes;Environmental Information Processing;Human Diseases;Environmental Information Processing;Environmental Information Processing;Cellular Processes;Cellular Processes;Environmental Information Processing;Environmental Information Processing;Organismal Systems;Cellular Processes	Cancers;Cell motility;Signal transduction;Infectious diseases;Signal transduction;Signal transduction;Transport and catabolism;Cell growth and death;Signal transduction;Signal transduction;Immune system;Transport and catabolism	ko05205//Proteoglycans in cancer;ko04810//Regulation of actin cytoskeleton;ko04015//Rap1 signaling pathway;ko05166//HTLV-I infection;ko04010//MAPK signaling pathway;ko04014//Ras signaling pathway;ko04140//Autophagy - animal;ko04218//Cellular senescence;ko04072//Phospholipase D signaling pathway;ko04371//Apelin signaling pathway;ko04625//C-type lectin receptor signaling pathway;ko04137//Mitophagy …	K07831;K07831;K07831;K07831;K07831;K07831;K07831;K07831;K07831;K07831;K07831;K07831	GO:0044464//cell part	GO:0032550//purine ribonucleoside binding	GO:0008104//protein localization;GO:0035556//intracellular signal transduction
7	ncbi_113822643	ncbi_113822643	0.564452255	0.387921887	0.541085378	6.42E-12	1.72E-07	--	PREDICTED: golgin subfamily A member 4-like [Limulus polyphemus]	-	-	-	-	-	-	-
7	ncbi_113823491	crtK	1.791459084	1.389364892	0.366709546	7.00E-12	1.88E-07	crtK	PREDICTED: translocator protein [Bactrocera oleae]	Environmental Information Processing;Human Diseases;Cellular Processes;Organismal Systems	Signaling molecules and interaction;Infectious diseases;Cell growth and death;Digestive system	ko04080//Neuroactive ligand-receptor interaction;ko05166//HTLV-I infection;ko04214//Apoptosis - fly;ko04979//Cholesterol metabolism	K05770;K05770;K05770;K05770	-	-	-
7	ncbi_113805276	SNRNP35	0.51829124	0.320670272	0.692672397	7.09E-12	1.90E-07	SNRNP35	U11/U12 small nuclear ribonucleoprotein 35 kDa protein, partial [Corvus brachyrhynchos]	-	-	-	-	-	-	-
7	ncbi_113802626	Nlrp10	0.609829691	0.389118553	0.648196625	7.54E-12	2.02E-07	Nlrp10	PREDICTED: NLR family CARD domain-containing protein 4-like [Lingula anatina]	Organismal Systems	Immune system	ko04621//NOD-like receptor signaling pathway	K20865	-	-	-
7	ncbi_113822765	Pdcl	1.396343038	1.018234076	0.455584158	7.84E-12	2.10E-07	Pdcl	PREDICTED: phosducin-like protein isoform X1 [Hyalella azteca]	-	-	-	-	-	-	-
7	ncbi_113821634	BLOC1S1	0.62501113	0.380884629	0.714527814	1.09E-11	2.92E-07	BLOC1S1	PREDICTED: biogenesis of lysosome-related organelles complex 1 subunit 1 [Polistes canadensis]	-	-	-	-	-	-	-
7	ncbi_113805875	ncbi_113805875	1.328847535	0.926602905	0.520152477	1.29E-11	3.46E-07	--	-	-	-	-	-	-	-	-
7	ncbi_113809714	ncbi_113809714	3.633192019	2.494083488	0.542727856	1.72E-11	4.62E-07	--	transcription factor ATF-b [Litopenaeus vannamei]	-	-	-	-	-	-	-
7	ncbi_113805977	DNAJA1	1.31773336	0.981873917	0.42444879	1.78E-11	4.77E-07	DNAJA1	heat shock protein 40 [Marsupenaeus japonicus]	Genetic Information Processing	Folding, sorting and degradation	ko04141//Protein processing in endoplasmic reticulum	K09502	GO:0031988//membrane-bounded vesicle;GO:0044444//cytoplasmic part	GO:0031072//heat shock protein binding;GO:0032550//purine ribonucleoside binding;GO:0043169//cation binding;GO:0044389//ubiquitin-like protein ligase binding;GO:0070325//lipoprotein particle receptor binding	GO:0006950//response to stress;GO:0015031//protein transport;GO:0030518//intracellular steroid hormone receptor signaling pathway;GO:0031396//regulation of protein ubiquitination;GO:0033365//protein localization to organelle;GO:0042981//regulation of apoptotic process;GO:0043407//negative regulation of MAP kinase activity;GO:0048232//male gamete generation;GO:0048870//cell motility
7	ncbi_113825438	EIF4G2	0.82430644	0.567318394	0.539022124	2.03E-11	5.44E-07	EIF4G2	Eukaryotic translation initiation factor 4 gamma [Daphnia magna]	Genetic Information Processing;Human Diseases	Translation;Cardiovascular diseases	ko03013//RNA transport;ko05416//Viral myocarditis	K03260;K03260	-	-	-
7	ncbi_113818704	ncbi_113818704	0.761087369	0.483892433	0.653375699	2.67E-11	7.14E-07	--	-	-	-	-	-	-	-	-
7	ncbi_113813479	znf593	0.73118203	0.52605003	0.475030602	2.75E-11	7.36E-07	znf593	PREDICTED: zinc finger protein 593 homolog [Trachymyrmex cornetzi]	-	-	-	-	-	-	-
7	ncbi_113819342	GOLGA7B	0.779464228	0.504444195	0.627788136	3.91E-11	1.05E-06	GOLGA7B	PREDICTED: golgin subfamily A member 7-like isoform X1 [Hyalella azteca]	-	-	-	-	-	-	-
7	ncbi_113815039	Lyar	0.718800697	0.532224936	0.433555702	3.95E-11	1.06E-06	Lyar	Zgc:65749 [Danio rerio]	-	-	-	-	-	-	-
7	ncbi_113803758	Iscu	0.859615168	0.631575849	0.444734934	7.34E-11	1.96E-06	Iscu	PREDICTED: iron-sulfur cluster assembly enzyme ISCU, mitochondrial-like [Hyalella azteca]	-	-	-	-	-	-	-
7	ncbi_113811333	N4bp2l2	0.456338859	0.309252622	0.561319681	8.70E-11	2.33E-06	N4bp2l2	PREDICTED: NEDD4-binding protein 2-like [Lingula anatina]	-	-	-	-	-	-	-
7	ncbi_113805978	nop16	1.383907935	1.079337531	0.358601875	9.41E-11	2.52E-06	nop16	PREDICTED: nucleolar protein 16-like [Lingula anatina]	-	-	-	-	-	-	-
7	ncbi_113802390	uck2a	0.964086225	0.672145201	0.520389254	1.03E-10	2.75E-06	uck2a	PREDICTED: uridine-cytidine kinase 2-like [Hyalella azteca]	Metabolism;Metabolism;Metabolism	Global and overview maps;Xenobiotics biodegradation and metabolism;Nucleotide metabolism	ko01100//Metabolic pathways;ko00983//Drug metabolism - other enzymes;ko00240//Pyrimidine metabolism	K00876;K00876;K00876	-	GO:0016772//transferase activity, transferring phosphorus-containing groups;GO:0032550//purine ribonucleoside binding	GO:0006796//phosphate-containing compound metabolic process
7	ncbi_113802078	REXO1L1	0.947152631	0.650220882	0.542667042	1.20E-10	3.22E-06	REXO1L1	PREDICTED: RNA exonuclease 3 isoform X2 [Vollenhovia emeryi]	Genetic Information Processing	Translation	ko03008//Ribosome biogenesis in eukaryotes	K14570	-	-	-
7	ncbi_113825440	ncbi_113825440	0.519487925	0.400229302	0.37626342	1.37E-10	3.67E-06	--	-	-	-	-	-	-	-	-
7	ncbi_113813626	eif4e3-b	0.606091395	0.397748762	0.60767792	1.42E-10	3.80E-06	eif4e3-b	PREDICTED: eukaryotic translation initiation factor 4E type 3-like [Limulus polyphemus]	-	-	-	-	-	-	-
7	ncbi_113812130	4CL5	2.111496463	1.642440523	0.362424702	1.76E-10	4.72E-06	4CL5	PREDICTED: 4-coumarate--CoA ligase 1 isoform X1 [Strongylocentrotus purpuratus]	Metabolism;Metabolism;Metabolism	Global and overview maps;Amino acid metabolism;Metabolism of cofactors and vitamins	ko01100//Metabolic pathways;ko00360//Phenylalanine metabolism;ko00130//Ubiquinone and other terpenoid-quinone biosynthesis	K01904;K01904;K01904	-	-	-
7	ncbi_113810783	ncbi_113810783	0.803376393	0.514895327	0.64179689	1.77E-10	4.74E-06	--	PREDICTED: zinc finger protein 2 homolog [Hyalella azteca]	-	-	-	-	-	-	-
7	ncbi_113808848	KLF11	0.694750864	0.448207247	0.632329749	1.87E-10	5.00E-06	KLF11	kruppel-like factor [Litopenaeus vannamei]	-	-	-	-	-	-	-
7	ncbi_113804427	ncbi_113804427	0.5243655	0.361047059	0.538385877	1.98E-10	5.30E-06	--	-	-	-	-	-	-	-	-
7	ncbi_113820819	Hnrnpl	1.654786973	1.289030577	0.36035902	4.13E-10	1.10E-05	Hnrnpl	PREDICTED: heterogeneous nuclear ribonucleoprotein L-like isoform X2 [Hyalella azteca]	-	-	-	-	-	-	-
7	ncbi_113824993	Trabd	0.902109198	0.647508787	0.478402308	4.17E-10	1.12E-05	Trabd	PREDICTED: traB domain-containing protein isoform X5 [Cephus cinctus]	-	-	-	-	-	-	-
7	ncbi_113816727	blcap	0.653840035	0.444664911	0.556219154	4.40E-10	1.18E-05	blcap	Bladder cancer-associated protein [Orchesella cincta]	-	-	-	-	-	-	-
7	ncbi_113806765	ube2t	0.620831233	0.391007592	0.667004518	6.68E-10	1.79E-05	ube2t	PREDICTED: ubiquitin-conjugating enzyme E2 T [Aptenodytes forsteri]	Genetic Information Processing	Replication and repair	ko03460//Fanconi anemia pathway	K13960	-	-	-
7	ncbi_113820768	arl8ba	0.503354272	0.324125394	0.635022106	7.88E-10	2.11E-05	arl8ba	PREDICTED: ADP-ribosylation factor-like protein 8B-A [Hyalella azteca]	-	-	-	-	GO:0044464//cell part	GO:0032550//purine ribonucleoside binding	GO:0035556//intracellular signal transduction
7	ncbi_113828945	PYCR1	0.582704652	0.391148824	0.575047201	8.81E-10	2.36E-05	PYCR1	PREDICTED: pyrroline-5-carboxylate reductase 3 [Tribolium castaneum]	Metabolism;Metabolism;Metabolism	Global and overview maps;Global and overview maps;Amino acid metabolism	ko01100//Metabolic pathways;ko01230//Biosynthesis of amino acids;ko00330//Arginine and proline metabolism	K00286;K00286;K00286	-	-	GO:0008652//cellular amino acid biosynthetic process
7	ncbi_113805057	Lis-1	0.811451471	0.608320863	0.415672334	9.05E-10	2.42E-05	Lis-1	PREDICTED: lissencephaly-1 homolog [Hyalella azteca]	Metabolism;Metabolism	Global and overview maps;Lipid metabolism	ko01100//Metabolic pathways;ko00565//Ether lipid metabolism	K16794;K16794	-	-	-
7	ncbi_113808651	Mad	0.52571716	0.329671519	0.673257575	9.48E-10	2.54E-05	Mad	Mothers against decapentaplegic [Daphnia magna]	Environmental Information Processing;Human Diseases;Environmental Information Processing;Cellular Processes;Environmental Information Processing	Signal transduction;Cancers;Signal transduction;Cellular community - eukaryotes;Signal transduction	ko04390//Hippo signaling pathway;ko05202//Transcriptional misregulation in cancers;ko04391//Hippo signaling pathway -fly;ko04550//Signaling pathways regulating pluripotency of stem cells;ko04350//TGF-beta signaling pathway	K04676;K04676;K04676;K04676;K04676	GO:0043231//intracellular membrane-bounded organelle;GO:0043234//protein complex	GO:0001071//nucleic acid binding transcription factor activity;GO:0005515//protein binding	GO:0007178//transmembrane receptor protein serine/threonine kinase signaling pathway;GO:0010468//regulation of gene expression;GO:0034645//cellular macromolecule biosynthetic process
7	ncbi_113814021	Chmp6	0.941804642	0.651595915	0.531450274	1.02E-09	2.73E-05	Chmp6	PREDICTED: charged multivesicular body protein 6 [Ceratina calcarata]	Cellular Processes;Cellular Processes	Transport and catabolism;Cell growth and death	ko04144//Endocytosis;ko04217//Necroptosis	K12195;K12195	-	-	-
7	ncbi_113822476	ncbi_113822476	0.899207987	0.669570137	0.425419665	1.03E-09	2.76E-05	--	-	-	-	-	-	-	-	-
7	ncbi_113810820	tmem256	1.078067316	0.819530925	0.39557697	1.10E-09	2.94E-05	tmem256	PREDICTED: transmembrane protein 256 homolog isoform X1 [Hyalella azteca]	-	-	-	-	-	-	GO:0006812//cation transport
7	ncbi_113822332	ncbi_113822332	0.967258496	0.747655814	0.371527223	1.25E-09	3.34E-05	--	-	-	-	-	-	-	-	-
7	ncbi_113806303	ncbi_113806303	1.138246443	0.858461024	0.406988412	1.49E-09	3.98E-05	--	PREDICTED: glioma tumor suppressor candidate region gene 2 protein-like isoform X1 [Limulus polyphemus]	Human Diseases	Infectious diseases	ko05168//Herpes simplex infection	K14840	-	-	-
7	ncbi_113826212	eif3k	1.665356737	1.180402792	0.496552013	1.56E-09	4.18E-05	eif3k	eukaryotic translation initiation factor 3 subunit 12 [Procambarus clarkii]	-	-	-	-	GO:0043234//protein complex;GO:0070993//translation preinitiation complex	GO:0008135//translation factor activity, RNA binding;GO:0043021//ribonucleoprotein complex binding	GO:0006417//regulation of translation
7	ncbi_113825373	usp10-a	0.927070459	0.697634377	0.410207858	1.61E-09	4.32E-05	usp10-a	PREDICTED: ubiquitin carboxyl-terminal hydrolase 10 [Vollenhovia emeryi]	-	-	-	-	GO:0044424//intracellular part	GO:0070011//peptidase activity, acting on L-amino acid peptides	GO:0006508//proteolysis;GO:0006974//cellular response to DNA damage stimulus;GO:0044248//cellular catabolic process;GO:0044260//cellular macromolecule metabolic process
7	ncbi_113805348	Exosc3	0.538238006	0.359681097	0.581525925	1.66E-09	4.44E-05	Exosc3	PREDICTED: exosome complex component RRP40-like [Hyalella azteca]	Genetic Information Processing	Folding, sorting and degradation	ko03018//RNA degradation	K03681	-	-	-
7	ncbi_113830369	plpp6	1.541684851	1.104016297	0.481746413	1.83E-09	4.89E-05	plpp6	Presqualene diphosphate phosphatase [Zootermopsis nevadensis]	-	-	-	-	-	-	-
7	ncbi_113800942	ncbi_113800942	0.522215651	0.351775232	0.569991787	1.95E-09	5.21E-05	--	-	-	-	-	-	-	-	-
7	ncbi_113812678	ncbi_113812678	0.799536445	0.569173698	0.490294801	2.11E-09	5.64E-05	--	PREDICTED: protein muscleblind isoform X6 [Nasonia vitripennis]	-	-	-	-	GO:0031672//A band;GO:0031674//I band;GO:0043231//intracellular membrane-bounded organelle	GO:0003676//nucleic acid binding	GO:0012501//programmed cell death;GO:0019725//cellular homeostasis;GO:0035114//imaginal disc-derived appendage morphogenesis;GO:0042051//compound eye photoreceptor development;GO:0048024//regulation of mRNA splicing, via spliceosome;GO:0060180//female mating behavior;GO:0061061//muscle structure development
7	ncbi_113823538	PCYT2	1.823664787	1.231900913	0.56595435	2.14E-09	5.72E-05	PCYT2	PREDICTED: ethanolamine-phosphate cytidylyltransferase-like [Hyalella azteca]	Metabolism;Metabolism;Metabolism	Global and overview maps;Lipid metabolism;Metabolism of other amino acids	ko01100//Metabolic pathways;ko00564//Glycerophospholipid metabolism;ko00440//Phosphonate and phosphinate metabolism	K00967;K00967;K00967	-	-	GO:0008152//metabolic process
7	ncbi_113819887	FNBP1	0.784169722	0.561034979	0.483075215	2.38E-09	6.38E-05	FNBP1	PREDICTED: formin-binding protein 1-like isoform X2 [Hyalella azteca]	-	-	-	-	-	-	-
7	ncbi_113821478	Appl	0.571144939	0.376378404	0.601673052	2.39E-09	6.40E-05	Appl	PREDICTED: beta-amyloid-like protein isoform X2 [Hyalella azteca]	Human Diseases;Organismal Systems	Neurodegenerative diseases;Nervous system	ko05010//Alzheimer disease;ko04726//Serotonergic synapse	K04520;K04520	-	-	-
7	ncbi_113818273	ncbi_113818273	0.63998663	0.431696781	0.568023433	2.47E-09	6.60E-05	--	PREDICTED: uncharacterized protein LOC108670006 isoform X2 [Hyalella azteca]	-	-	-	-	-	-	-
7	ncbi_113813705	UBE2R2	1.459703157	1.122923146	0.378415822	2.67E-09	7.14E-05	UBE2R2	ubiquitin-conjugating enyzme E2r [Marsupenaeus japonicus]	Genetic Information Processing;Human Diseases	Folding, sorting and degradation;Infectious diseases	ko04120//Ubiquitin mediated proteolysis;ko05168//Herpes simplex infection	K02207;K02207	-	GO:0003824//catalytic activity	-
7	ncbi_113800646	SSSCA1	0.566873204	0.359146028	0.658455516	5.41E-09	0.000144956	SSSCA1	PREDICTED: Sjoegren syndrome/scleroderma autoantigen 1 [Crassostrea gigas]	-	-	-	-	-	-	-
7	ncbi_113814455	ncbi_113814455	1.202790273	0.939599545	0.356267185	5.47E-09	0.000146504	--	-	-	-	-	-	-	-	-
7	ncbi_113824269	ncbi_113824269	0.968457912	0.622224157	0.638254946	5.68E-09	0.000151969	--	PREDICTED: furin-like protease 2 [Neodiprion lecontei]	-	-	-	-	-	-	-
7	ncbi_113821183	POLD3	0.667804186	0.462016336	0.531481272	6.15E-09	0.000164654	POLD3	PREDICTED: DNA polymerase delta subunit 3-like isoform X1 [Hyalella azteca]	Metabolism;Metabolism;Human Diseases;Metabolism;Genetic Information Processing;Genetic Information Processing;Genetic Information Processing;Genetic Information Processing;Genetic Information Processing	Global and overview maps;Nucleotide metabolism;Infectious diseases;Nucleotide metabolism;Replication and repair;Replication and repair;Replication and repair;Replication and repair;Replication and repair	ko01100//Metabolic pathways;ko00230//Purine metabolism;ko05166//HTLV-I infection;ko00240//Pyrimidine metabolism;ko03420//Nucleotide excision repair;ko03410//Base excision repair;ko03440//Homologous recombination;ko03030//DNA replication;ko03430//Mismatch repair	K03504;K03504;K03504;K03504;K03504;K03504;K03504;K03504;K03504	-	-	-
7	ncbi_113827782	GATAD2B	0.613972509	0.439675601	0.481734585	7.15E-09	0.000191556	GATAD2B	PREDICTED: transcriptional repressor p66-beta [Aethina tumida]	-	-	-	-	-	-	-
7	ncbi_113818566	BRIX1	0.720374946	0.519082287	0.472784747	1.02E-08	0.000274271	BRIX1	PREDICTED: ribosome biogenesis protein BRX1 homolog [Lingula anatina]	-	-	-	-	-	-	-
7	ncbi_113810206	Klhdc4	0.700378902	0.492403221	0.508295424	1.04E-08	0.000278275	Klhdc4	Kelch domain-containing protein 4 [Zootermopsis nevadensis]	-	-	-	-	-	-	-
7	ncbi_113822063	ncbi_113822063	0.951822346	0.680825808	0.483406599	1.16E-08	0.00030941	--	PREDICTED: uncharacterized protein LOC108675159 [Hyalella azteca]	-	-	-	-	-	-	-
7	ncbi_113809437	ncbi_113809437	0.549803057	0.340710045	0.690370449	1.21E-08	0.000323238	--	PREDICTED: docking protein 2-like [Hyalella azteca]	-	-	-	-	-	-	-
7	ncbi_113802382	pit	0.818468317	0.582544313	0.490558774	1.30E-08	0.00034787	pit	ATP-dependent RNA Helicase pitchoune [Daphnia magna]	-	-	-	-	-	-	-
7	ncbi_113811780	Fis1	0.76574036	0.501172659	0.611547588	1.34E-08	0.000359449	Fis1	PREDICTED: mitochondrial fission 1 protein-like [Hyalella azteca]	Cellular Processes	Transport and catabolism	ko04137//Mitophagy - animal	K17969	-	-	-
7	ncbi_113819809	ncbi_113819809	0.945061914	0.666794564	0.503166505	1.37E-08	0.000366886	--	PREDICTED: GSK-3-binding protein-like [Hyalella azteca]	Human Diseases;Human Diseases;Environmental Information Processing;Human Diseases;Human Diseases	Cancers;Cancers;Signal transduction;Cancers;Cancers	ko05200//Pathways in cancer;ko05225//Hepatocellular carcinoma;ko04310//Wnt signaling pathway;ko05224//Breast cancer;ko05226//Gastric cancer	K03096;K03096;K03096;K03096;K03096	-	-	-
7	ncbi_113808955	Cnot4	0.759882388	0.557010758	0.448070949	1.74E-08	0.0004647	Cnot4	CCR4-NOT transcription complex subunit 4 [Zootermopsis nevadensis]	Genetic Information Processing	Folding, sorting and degradation	ko03018//RNA degradation	K10643	-	-	-
7	ncbi_113826159	Pip5k1a	0.644045112	0.495286346	0.378898896	1.79E-08	0.000478839	Pip5k1a	PREDICTED: phosphatidylinositol 4-phosphate 5-kinase type-1 alpha isoform X4 [Cephus cinctus]	Metabolism;Cellular Processes;Cellular Processes;Cellular Processes;Human Diseases;Environmental Information Processing;Metabolism;Organismal Systems;Environmental Information Processing	Global and overview maps;Cellular community - eukaryotes;Cell motility;Transport and catabolism;Cancers;Signal transduction;Carbohydrate metabolism;Immune system;Signal transduction	ko01100//Metabolic pathways;ko04510//Focal adhesion;ko04810//Regulation of actin cytoskeleton;ko04144//Endocytosis;ko05231//Choline metabolism in cancer;ko04072//Phospholipase D signaling pathway;ko00562//Inositol phosphate metabolism;ko04666//Fc gamma R-mediated phagocytosis;ko04070//Phosphatidylinositol signaling system	K00889;K00889;K00889;K00889;K00889;K00889;K00889;K00889;K00889	-	-	-
7	ncbi_113818688	MAP2K7	0.640421431	0.480745165	0.413749238	2.04E-08	0.000546235	MAP2K7	mitogen-activated protein kinase kinase 7 [Litopenaeus vannamei]	Genetic Information Processing;Cellular Processes;Environmental Information Processing;Human Diseases;Human Diseases;Environmental Information Processing;Human Diseases;Cellular Processes;Organismal Systems;Organismal Systems;Human Diseases;Environmental Information Processing;Organismal Systems;Organismal Systems;Environmental Information Processing;Organismal Systems;Organismal Systems;Organism…	Folding, sorting and degradation;Cellular community - eukaryotes;Signal transduction;Infectious diseases;Cardiovascular diseases;Signal transduction;Infectious diseases;Cell growth and death;Endocrine system;Nervous system;Infectious diseases;Signal transduction;Endocrine system;Immune system;Signal transduction;Immune system;Immune system;Development;Immune system	ko04141//Protein processing in endoplasmic reticulum;ko04530//Tight junction;ko04013//MAPK signaling pathway - fly;ko05164//Influenza A;ko05418//Fluid shear stress and atherosclerosis;ko04010//MAPK signaling pathway;ko05169//Epstein-Barr virus infection;ko04214//Apoptosis - fly;ko04926//Relaxin signaling pathway;ko04722//Neurotrophin signaling pathway;ko05167//Kaposi sarcoma-associated herpesviru…	K04431;K04431;K04431;K04431;K04431;K04431;K04431;K04431;K04431;K04431;K04431;K04431;K04431;K04431;K04431;K04431;K04431;K04431;K04431	-	-	-
7	ncbi_113809991	ImpL3	1.045634954	0.706402115	0.565817708	2.19E-08	0.000586284	ImpL3	lactate dehydrogenase [Litopenaeus vannamei]	Metabolism;Metabolism;Environmental Information Processing;Organismal Systems;Human Diseases;Metabolism;Metabolism;Metabolism	Global and overview maps;Carbohydrate metabolism;Signal transduction;Endocrine system;Cancers;Amino acid metabolism;Carbohydrate metabolism;Carbohydrate metabolism	ko01100//Metabolic pathways;ko00010//Glycolysis / Gluconeogenesis;ko04066//HIF-1 signaling pathway;ko04922//Glucagon signaling pathway;ko05230//Central carbon metabolism in cancer;ko00270//Cysteine and methionine metabolism;ko00620//Pyruvate metabolism;ko00640//Propanoate metabolism	K00016;K00016;K00016;K00016;K00016;K00016;K00016;K00016	GO:0044424//intracellular part	GO:0004457//lactate dehydrogenase activity	GO:0005975//carbohydrate metabolic process;GO:0044710//single-organism metabolic process
7	ncbi_113820513	ncbi_113820513	0.616735142	0.470166354	0.391479754	2.26E-08	0.000605631	--	-	-	-	-	-	-	-	-
7	ncbi_113816605	eIF5	0.55924188	0.372158369	0.587555726	2.43E-08	0.000650722	eIF5	PREDICTED: eukaryotic translation initiation factor 5-like [Hyalella azteca]	Genetic Information Processing;Cellular Processes	Translation;Cell growth and death	ko03013//RNA transport;ko04214//Apoptosis - fly	K03262;K03262	-	-	-
7	ncbi_113824161	Wsb1	0.808188688	0.516573898	0.64571741	3.10E-08	0.000829545	Wsb1	PREDICTED: WD repeat and SOCS box-containing protein 1-like [Limulus polyphemus]	-	-	-	-	-	-	-
7	ncbi_113803504	pit	0.563594146	0.39775033	0.5027935	3.69E-08	0.000988767	pit	PREDICTED: probable ATP-dependent RNA helicase pitchoune [Polistes canadensis]	-	-	-	-	-	GO:0003676//nucleic acid binding;GO:0016787//hydrolase activity	-
7	ncbi_113828389	Gulp1	0.704515413	0.500948811	0.491968081	3.79E-08	0.001014679	Gulp1	PREDICTED: LOW QUALITY PROTEIN: PTB domain-containing engulfment adapter protein 1-like [Hyalella azteca]	-	-	-	-	-	-	-
7	ncbi_113808588	vps29	1.031714172	0.731928216	0.495269272	4.95E-08	0.001326512	vps29	Xaa-pro dipeptidase-like protein [Coptotermes formosanus]	Cellular Processes	Transport and catabolism	ko04144//Endocytosis	K18467	-	-	-
7	ncbi_113806783	ncbi_113806783	0.815376621	0.597391662	0.448789489	5.90E-08	0.001580023	--	-	-	-	-	-	-	-	-
7	ncbi_113804462	Jmjd7	0.643832738	0.454864827	0.501248057	6.04E-08	0.001618014	Jmjd7	PREDICTED: jmjC domain-containing protein 7 [Saccoglossus kowalevskii]	-	-	-	-	-	-	-
7	ncbi_113820236	NUP54	0.490046423	0.343458056	0.512784503	6.20E-08	0.00165939	NUP54	PREDICTED: nucleoporin p54 isoform X2 [Callorhinchus milii]	Genetic Information Processing	Translation	ko03013//RNA transport	K14308	-	-	-
7	ncbi_113809358	ncbi_113809358	0.685699476	0.531802613	0.366685552	9.50E-08	0.002544824	--	Protein anon-73B1 [Orchesella cincta]	-	-	-	-	-	-	-
7	ncbi_113819791	AK6	1.452353949	1.130759908	0.361100453	1.02E-07	0.002729883	AK6	adenylate kinase isoenzyme 6 [Callorhinchus milii]	Metabolism;Metabolism;Genetic Information Processing	Global and overview maps;Nucleotide metabolism;Translation	ko01100//Metabolic pathways;ko00230//Purine metabolism;ko03008//Ribosome biogenesis in eukaryotes	K18532;K18532;K18532	GO:0016604//nuclear body	GO:0016776//phosphotransferase activity, phosphate group as acceptor;GO:0017111//nucleoside-triphosphatase activity;GO:0032550//purine ribonucleoside binding	GO:0009117//nucleotide metabolic process
7	ncbi_113821551	ncbi_113821551	0.526221571	0.352173238	0.579385108	1.11E-07	0.002983796	--	-	-	-	-	-	-	-	-
7	ncbi_113824302	SDAD1	0.485457879	0.344479593	0.494927604	1.21E-07	0.003243138	SDAD1	PREDICTED: protein SDA1 homolog [Anoplophora glabripennis]	-	-	-	-	-	-	-
7	ncbi_113824599	Ascc1	0.483586351	0.343375207	0.49398765	1.28E-07	0.00341863	Ascc1	PREDICTED: activating signal cointegrator 1 complex subunit 1-like [Limulus polyphemus]	-	-	-	-	-	-	-
7	ncbi_113813371	trappc2l	0.542453989	0.376763984	0.525839714	1.83E-07	0.004892485	trappc2l	PREDICTED: trafficking protein particle complex subunit 2-like protein [Hyalella azteca]	-	-	-	-	-	-	GO:0006810//transport
7	ncbi_113828196	Nop17l	0.651443452	0.492159671	0.404513507	4.01E-07	0.010730348	Nop17l	PREDICTED: protein kintoun [Acromyrmex echinatior]	-	-	-	-	-	-	-
7	ncbi_113802704	ncbi_113802704	0.581139117	0.427801308	0.441942675	4.12E-07	0.011030727	--	PREDICTED: transforming acidic coiled-coil-containing protein 2-like [Hyalella azteca]	-	-	-	-	-	-	-
7	ncbi_113806936	mep-1	1.022895173	0.781276231	0.388753677	5.43E-07	0.014531098	mep-1	PREDICTED: MOG interacting and ectopic P-granules protein 1 isoform X4 [Halyomorpha halys]	-	-	-	-	-	-	-
7	ncbi_113807654	Dynlt1	0.738709372	0.573318092	0.365671075	7.06E-07	0.018909608	Dynlt1	PREDICTED: dynein light chain Tctex-type 1-like [Hyalella azteca]	-	-	-	-	-	-	-
7	ncbi_113802077	ZDHHC20	0.49135553	0.343877986	0.514870532	7.19E-07	0.019263637	ZDHHC20	PREDICTED: palmitoyltransferase ZDHHC15-like isoform X2 [Hyalella azteca]	-	-	-	-	-	-	-
7	ncbi_113822151	ncbi_113822151	0.541247934	0.418155969	0.372248455	7.76E-07	0.020785114	--	PREDICTED: transcription factor TFIIIB component B'' homolog [Hyalella azteca]	-	-	-	-	-	-	-
7	ncbi_113829355	ncbi_113829355	1.076206469	0.79643393	0.434328293	7.86E-07	0.021036031	--	PREDICTED: thymus-specific serine protease-like, partial [Notothenia coriiceps]	-	-	-	-	-	-	-
7	ncbi_113824281	EGLN1	0.618295621	0.429770719	0.524729597	8.65E-07	0.02317625	EGLN1	Egl nine-1 [Ceratitis capitata]	-	-	-	-	GO:0044424//intracellular part	GO:0005085//guanyl-nucleotide exchange factor activity;GO:0016705//oxidoreductase activity, acting on paired donors, with incorporation or reduction of molecular oxygen	GO:0008152//metabolic process;GO:0035023//regulation of Rho protein signal transduction;GO:0048518//positive regulation of biological process
7	ncbi_113811290	Trappc1	0.779979404	0.586451813	0.411423459	9.26E-07	0.024794032	Trappc1	PREDICTED: trafficking protein particle complex subunit 1-like [Hyalella azteca]	-	-	-	-	-	-	GO:0016482//cytoplasmic transport
7	ncbi_113808292	EIF2B3	0.523254748	0.333697404	0.648973037	9.96E-07	0.02667027	EIF2B3	PREDICTED: translation initiation factor eIF-2B subunit gamma-like isoform X1 [Lingula anatina]	Genetic Information Processing	Translation	ko03013//RNA transport	K03241	-	-	-
7	ncbi_113804575	rho	0.536822701	0.388842258	0.465260667	1.13E-06	0.030325286	rho	Rhomboid-related protein 3 [Orchesella cincta]	Organismal Systems	Development	ko04320//Dorso-ventral axis formation	K02857	-	-	-
7	ncbi_113804224	ANGEL2	0.796781927	0.615397408	0.372666557	1.25E-06	0.03354778	ANGEL2	PREDICTED: protein angel homolog 2 [Anoplophora glabripennis]	-	-	-	-	-	-	-
7	ncbi_113809111	eIF3i	1.120787076	0.873143892	0.360220894	1.32E-06	0.035375849	eIF3i	PREDICTED: eukaryotic translation initiation factor 3 subunit I-like [Hyalella azteca]	Genetic Information Processing	Translation	ko03013//RNA transport	K03246	GO:0070993//translation preinitiation complex	-	GO:0006412//translation
7	ncbi_113812238	pfdn1	1.290669716	0.986047031	0.388391496	1.56E-06	0.041856685	pfdn1	PREDICTED: prefoldin subunit 1-like [Hyalella azteca]	-	-	-	-	-	-	-
7	ncbi_113813724	Galphaq	0.799750998	0.590961237	0.436487384	1.66E-06	0.044462312	Galphaq	Guanine nucleotide-binding protein G(q) subunit alpha [Cerapachys biroi]	Human Diseases;Human Diseases;Environmental Information Processing;Organismal Systems;Organismal Systems;Organismal Systems;Organismal Systems;Human Diseases;Environmental Information Processing;Organismal Systems;Human Diseases;Organismal Systems;Environmental Information Processing;Environmental Information Processing;Organismal Systems;Human Diseases;Organismal Systems;Organismal Systems;Human…	Cancers;Neurodegenerative diseases;Signal transduction;Sensory system;Immune system;Endocrine system;Digestive system;Neurodegenerative diseases;Signal transduction;Circulatory system;Endocrine and metabolic diseases;Digestive system;Signal transduction;Signal transduction;Nervous system;Infectious diseases;Circulatory system;Nervous system;Infectious diseases;Cellular community - eukaryotes;Nerv…	ko05200//Pathways in cancer;ko05016//Huntington disease;ko04015//Rap1 signaling pathway;ko04745//Phototransduction - fly;ko04611//Platelet activation;ko04921//Oxytocin signaling pathway;ko04972//Pancreatic secretion;ko05010//Alzheimer disease;ko04022//cGMP - PKG signaling pathway;ko04261//Adrenergic signaling in cardiomyocytes;ko04934//Cushing syndrome;ko04971//Gastric acid secretion;ko04071//Sph…	K04634;K04634;K04634;K04634;K04634;K04634;K04634;K04634;K04634;K04634;K04634;K04634;K04634;K04634;K04634;K04634;K04634;K04634;K04634;K04634;K04634;K04634;K04634;K04634;K04634;K04634;K04634;K04634;K04634;K04634;K04634;K04634;K04634;K04634;K04634;K04634;K04634;K04634;K04634;K04634;K04634;K04634	-	GO:0005102//receptor binding;GO:0017076//purine nucleotide binding;GO:0017111//nucleoside-triphosphatase activity;GO:0032403//protein complex binding;GO:0032550//purine ribonucleoside binding;GO:0060089//molecular transducer activity	GO:0007166//cell surface receptor signaling pathway
7	ncbi_113803701	MRTO4	0.545769538	0.408427031	0.418213523	1.95E-06	0.052112903	MRTO4	mRNA turnover protein 4 [Daphnia magna]	-	-	-	-	-	-	-
7	ncbi_113828837	Tbca	1.046948883	0.761352013	0.459555458	2.42E-06	0.064870261	Tbca	PREDICTED: tubulin-specific chaperone A-like [Hyalella azteca]	-	-	-	-	GO:0015630//microtubule cytoskeleton;GO:0031988//membrane-bounded vesicle	GO:0003723//RNA binding;GO:0005515//protein binding	GO:0043623//cellular protein complex assembly
7	ncbi_113826145	Rnf25	0.463049155	0.326031707	0.506153076	2.44E-06	0.065230011	Rnf25	PREDICTED: E3 ubiquitin-protein ligase RNF25-like [Hyalella azteca]	-	-	-	-	-	-	-
7	ncbi_113826183	Chtop	0.551163029	0.364393824	0.596980609	2.51E-06	0.067342895	Chtop	PREDICTED: chromatin target of PRMT1 protein [Fundulus heteroclitus]	-	-	-	-	-	-	-
7	ncbi_113814613	tws	0.886093472	0.682650159	0.37631247	2.72E-06	0.072963275	tws	serine/threonine-protein phosphatase PP2A regulatory subunit B isoform [Penaeus monodon]	Human Diseases;Environmental Information Processing;Cellular Processes;Environmental Information Processing;Environmental Information Processing;Organismal Systems;Environmental Information Processing;Environmental Information Processing;Genetic Information Processing;Organismal Systems;Human Diseases;Human Diseases	Infectious diseases;Signal transduction;Cellular community - eukaryotes;Signal transduction;Signal transduction;Circulatory system;Signal transduction;Signal transduction;Translation;Nervous system;Infectious diseases;Infectious diseases	ko05165//Human papillomavirus infection;ko04151//PI3K-Akt signaling pathway;ko04530//Tight junction;ko04390//Hippo signaling pathway;ko04391//Hippo signaling pathway -fly;ko04261//Adrenergic signaling in cardiomyocytes;ko04071//Sphingolipid signaling pathway;ko04152//AMPK signaling pathway;ko03015//mRNA surveillance pathway;ko04728//Dopaminergic synapse;ko05160//Hepatitis C;ko05142//Chagas diseas…	K04354;K04354;K04354;K04354;K04354;K04354;K04354;K04354;K04354;K04354;K04354;K04354	-	GO:0019888//protein phosphatase regulator activity	GO:0019222//regulation of metabolic process;GO:0050794//regulation of cellular process
7	ncbi_113808115	ncbi_113808115	0.787552167	0.608995971	0.370942805	3.30E-06	0.088469707	--	AAEL005369-PB [Aedes aegypti]	-	-	-	-	-	-	-
7	ncbi_113812879	Elmod3	0.540438969	0.412269811	0.390542884	4.05E-06	0.10857621	Elmod3	PREDICTED: ELMO domain-containing protein 3 [Scleropages formosus]	-	-	-	-	-	-	-
7	ncbi_113824583	cutC	0.875729961	0.679329076	0.366375465	4.19E-06	0.112184362	cutC	PREDICTED: copper homeostasis protein cutC homolog isoform X1 [Hyalella azteca]	-	-	-	-	-	-	-
7	ncbi_113830109	ncbi_113830109	0.48695776	0.357801428	0.444637491	4.86E-06	0.130073083	--	Vacuolar protein sorting-associated protein 37A [Zootermopsis nevadensis]	Cellular Processes	Transport and catabolism	ko04144//Endocytosis	K12185	-	-	-
7	ncbi_113804666	Flo2	0.49393961	0.350132291	0.496434548	4.91E-06	0.131392869	Flo2	flotillin-2 [Litopenaeus vannamei]	Organismal Systems	Endocrine system	ko04910//Insulin signaling pathway	K07192	-	-	-
7	ncbi_113822721	PNN	0.706432284	0.533308861	0.405579978	5.35E-06	0.143372684	PNN	PREDICTED: dentin sialophosphoprotein-like [Hyalella azteca]	Genetic Information Processing;Genetic Information Processing	Translation;Translation	ko03013//RNA transport;ko03015//mRNA surveillance pathway	K13114;K13114	-	-	-
7	ncbi_113826853	VPS35	0.500410447	0.341753236	0.550156912	6.14E-06	0.164491477	VPS35	Vacuolar protein sorting-associated protein 35 [Zootermopsis nevadensis]	Cellular Processes	Transport and catabolism	ko04144//Endocytosis	K18468	-	-	-
7	ncbi_113823780	ncbi_113823780	0.477093211	0.347648284	0.456642688	7.70E-06	0.206106474	--	-	-	-	-	-	-	-	-
7	ncbi_113802528	Retsat	0.764123677	0.577193102	0.404752107	8.61E-06	0.230579682	Retsat	PREDICTED: all-trans-retinol 13,14-reductase [Sinocyclocheilus grahami]	Metabolism	Metabolism of cofactors and vitamins	ko00830//Retinol metabolism	K09516	-	-	-
7	ncbi_113813533	rdgB	0.472549975	0.356962502	0.404694383	1.14E-05	0.305187024	rdgB	Protein retinal degeneration B [Zootermopsis nevadensis]	-	-	-	-	-	-	-
7	ncbi_113818853	ncbi_113818853	0.589918815	0.458442894	0.363774387	1.70E-05	0.45515478	--	PREDICTED: gamma-soluble NSF attachment protein [Tribolium castaneum]	-	-	-	-	-	-	-
7	ncbi_113800158	Galphai	0.468125281	0.354428863	0.401398584	2.02E-05	0.539618858	Galphai	GTP binding protein alpha subunit Gi [Marsupenaeus japonicus]	Human Diseases;Environmental Information Processing;Organismal Systems;Organismal Systems;Human Diseases;Environmental Information Processing;Organismal Systems;Environmental Information Processing;Organismal Systems;Human Diseases;Organismal Systems;Human Diseases;Environmental Information Processing;Organismal Systems;Organismal Systems;Organismal Systems;Human Diseases;Organismal Systems;Human…	Cancers;Signal transduction;Immune system;Endocrine system;Substance dependence;Signal transduction;Circulatory system;Signal transduction;Immune system;Endocrine and metabolic diseases;Digestive system;Neurodegenerative diseases;Signal transduction;Immune system;Nervous system;Endocrine system;Infectious diseases;Development;Infectious diseases;Nervous system;Cellular community - eukaryotes;Endo…	ko05200//Pathways in cancer;ko04015//Rap1 signaling pathway;ko04611//Platelet activation;ko04921//Oxytocin signaling pathway;ko05034//Alcoholism;ko04022//cGMP - PKG signaling pathway;ko04261//Adrenergic signaling in cardiomyocytes;ko04024//cAMP signaling pathway;ko04670//Leukocyte transendothelial migration;ko04934//Cushing syndrome;ko04971//Gastric acid secretion;ko05012//Parkinson disease;ko040…	K04630;K04630;K04630;K04630;K04630;K04630;K04630;K04630;K04630;K04630;K04630;K04630;K04630;K04630;K04630;K04630;K04630;K04630;K04630;K04630;K04630;K04630;K04630;K04630;K04630;K04630;K04630;K04630;K04630;K04630;K04630;K04630;K04630;K04630;K04630;K04630;K04630;K04630	-	GO:0017076//purine nucleotide binding;GO:0017111//nucleoside-triphosphatase activity;GO:0032403//protein complex binding;GO:0032550//purine ribonucleoside binding;GO:0043169//cation binding;GO:0060089//molecular transducer activity	GO:0007187//G-protein coupled receptor signaling pathway, coupled to cyclic nucleotide second messenger
7	ncbi_113811416	mthl1	0.598048448	0.458714873	0.382664675	2.86E-05	0.765689496	mthl1	PREDICTED: G-protein coupled receptor Mth2-like isoform X2 [Hyalella azteca]	-	-	-	-	-	-	-
7	ncbi_113810692	ncbi_113810692	0.517502201	0.394779319	0.390518584	2.96E-05	0.793171327	--	PREDICTED: CKLF-like MARVEL transmembrane domain-containing protein 4 [Anolis carolinensis]	-	-	-	-	-	-	-
7	ncbi_113804217	ncbi_113804217	0.542486561	0.409067153	0.407249702	3.03E-05	0.810886507	--	-	-	-	-	-	-	-	-
7	ncbi_113807663	Galr2	0.560750586	0.427809248	0.390391554	4.02E-05	1	Galr2	PREDICTED: G-protein coupled receptor moody-like [Parasteatoda tepidariorum]	Environmental Information Processing	Signaling molecules and interaction	ko04080//Neuroactive ligand-receptor interaction	K05053	-	-	-
7	ncbi_113807219	PPIE	0.649400154	0.498295228	0.38210697	4.66E-05	1	PPIE	PREDICTED: peptidyl-prolyl cis-trans isomerase E-like [Saccoglossus kowalevskii]	Genetic Information Processing	Transcription	ko03040//Spliceosome	K09564	-	GO:0003676//nucleic acid binding;GO:0016859//cis-trans isomerase activity	GO:0018208//peptidyl-proline modification
7	ncbi_113821366	Smad3	0.56928932	0.43056124	0.402943584	6.05E-05	1	Smad3	Mothers against decapentaplegic [Daphnia magna]	Human Diseases;Human Diseases;Human Diseases;Environmental Information Processing;Cellular Processes;Cellular Processes;Human Diseases;Cellular Processes;Environmental Information Processing;Environmental Information Processing;Cellular Processes;Human Diseases;Organismal Systems;Cellular Processes;Environmental Information Processing;Human Diseases;Human Diseases;Human Diseases;Environmental Inf…	Cancers;Cancers;Cancers;Signal transduction;Transport and catabolism;Cellular community - eukaryotes;Infectious diseases;Cell growth and death;Signal transduction;Signal transduction;Cell growth and death;Cancers;Endocrine system;Cellular community - eukaryotes;Signal transduction;Endocrine and metabolic diseases;Infectious diseases;Cancers;Signal transduction;Cancers;Infectious diseases;Cancers;…	ko05200//Pathways in cancer;ko05205//Proteoglycans in cancer;ko05225//Hepatocellular carcinoma;ko04390//Hippo signaling pathway;ko04144//Endocytosis;ko04520//Adherens junction;ko05166//HTLV-I infection;ko04110//Cell cycle;ko04310//Wnt signaling pathway;ko04068//FoxO signaling pathway;ko04218//Cellular senescence;ko05226//Gastric cancer;ko04926//Relaxin signaling pathway;ko04550//Signaling pathway…	K04500;K04500;K04500;K04500;K04500;K04500;K04500;K04500;K04500;K04500;K04500;K04500;K04500;K04500;K04500;K04500;K04500;K04500;K04500;K04500;K04500;K04500;K04500;K04500	GO:0043231//intracellular membrane-bounded organelle;GO:0043234//protein complex	GO:0001071//nucleic acid binding transcription factor activity	GO:0007178//transmembrane receptor protein serine/threonine kinase signaling pathway;GO:0010468//regulation of gene expression;GO:0034645//cellular macromolecule biosynthetic process
7	ncbi_113822031	Pwp1	0.622501318	0.483218719	0.365400547	6.85E-05	1	Pwp1	Periodic tryptophan protein 1-like protein [Zootermopsis nevadensis]	-	-	-	-	-	-	-
7	ncbi_113828611	riox1	0.524846155	0.406426224	0.368901104	0.00010771	1	riox1	PREDICTED: bifunctional lysine-specific demethylase and histidyl-hydroxylase NO66 isoform X1 [Crassostrea gigas]	-	-	-	-	-	-	-
7	ncbi_113799911	ANKFN1	0.688096825	0.531759478	0.371837745	0.000116466	1	ANKFN1	PREDICTED: ankyrin repeat and fibronectin type-III domain-containing protein 1-like isoform X2 [Hyalella azteca]	-	-	-	-	-	-	-
7	ncbi_113806580	Ppid	0.495086629	0.376508541	0.394998393	0.000131889	1	Ppid	PREDICTED: peptidyl-prolyl cis-trans isomerase D [Cynoglossus semilaevis]	Cellular Processes;Cellular Processes	Cell growth and death;Cell growth and death	ko04217//Necroptosis;ko04218//Cellular senescence	K05864;K05864	-	GO:0016853//isomerase activity	-
7	ncbi_113804306	SUMO3	0.529313136	0.406978605	0.379168505	0.000136048	1	SUMO3	PREDICTED: small ubiquitin-related modifier 2-like [Hyalella azteca]	Genetic Information Processing;Human Diseases	Translation;Cardiovascular diseases	ko03013//RNA transport;ko05418//Fluid shear stress and atherosclerosis	K12160;K12160	-	GO:0046914//transition metal ion binding	-
7	ncbi_113820301	TMEM30A	0.605458406	0.447794406	0.435191348	0.000155533	1	TMEM30A	PREDICTED: cell cycle control protein 50A-like isoform X2 [Hyalella azteca]	-	-	-	-	-	-	-
7	ncbi_113825501	YKT6	0.486042658	0.353991416	0.457368564	0.00015829	1	YKT6	PREDICTED: synaptobrevin homolog YKT6-like [Hyalella azteca]	Genetic Information Processing	Folding, sorting and degradation	ko04130//SNARE interactions in vesicular transport	K08516	GO:0031224//intrinsic component of membrane	-	GO:0006810//transport
7	ncbi_113824109	ncbi_113824109	0.512386276	0.364602933	0.490905668	0.000201903	1	--	-	-	-	-	-	-	-	-
7	ncbi_113804862	ncbi_113804862	0.514928481	0.388683894	0.405774742	0.000370474	1	--	PREDICTED: oocyte zinc finger protein XlCOF6-like [Larimichthys crocea]	-	-	-	-	-	-	-
7	ncbi_113827238	Fbxo22	0.524076665	0.406561985	0.366302549	0.000717178	1	Fbxo22	PREDICTED: F-box only protein 22-like isoform X2 [Limulus polyphemus]	-	-	-	-	-	-	-
