# Supplementary material for: Single-cell RNA sequencing analysis of shrimp immune cells identifies macrophage-like phagocytes
Source: eLife. 2022 Oct 6;11:e80127. doi: 10.7554/eLife.80127 (PMC9584607; doi:10.7554/eLife.80127)
Supplement: Supplementary file 6. [file elife-80127-supp6.csv]

Target_Cluster	Gene ID	Gene Name	Target_Cluster_mean	Other_Cluster_mean	Log2FC	Pvalue	Qvalue	Symbol	Description	KEGG_A_class	KEGG_B_class	Pathway	K_ID	GO Component	GO Function	GO Process
PH2	ncbi_113823934	TGM1	77.08055752	8.808432655	3.129409768	0	0	TGM1	hemocyte transglutaminase [Litopenaeus vannamei]	-	-	-	-	-	-	-
PH2	ncbi_113805892	ncbi_113805892	0.926904596	0.132385743	2.807673093	0	0	--	OV-16 antigen [Thelohanellus kitauei]	-	-	-	-	-	-	-
PH2	ncbi_113823945	ncbi_113823945	0.825093095	0.122320372	2.753892202	0	0	--	hemocyte transglutaminase [Litopenaeus vannamei]	-	-	-	-	-	-	-
PH2	ncbi_113814237	ncbi_113814237	40.54834135	6.223685796	2.703801769	0	0	--	PREDICTED: neurogenic locus notch homolog protein 1-like [Hyalella azteca]	-	-	-	-	-	-	-
PH2	ncbi_113803465	ncbi_113803465	0.528137315	0.095368398	2.469329885	0	0	--	-	-	-	-	-	-	-	-
PH2	ncbi_113811702	Igfbp7	196.7500813	38.29366144	2.361186717	0	0	Igfbp7	single insulin-like growth factor-binding domain protein-2 [Cupiennius salei]	-	-	-	-	-	-	-
PH2	ncbi_113808957	ncbi_113808957	47.86524703	9.332116818	2.358702283	0	0	--	PREDICTED: neurogenic locus notch homolog protein 1-like [Hyalella azteca]	-	-	-	-	-	-	-
PH2	ncbi_113812814	PPAF2	3.357196727	0.70744918	2.246558659	0	0	PPAF2	masquerade-like serine proteinase-like protein 3 [Penaeus monodon]	-	-	-	-	-	-	-
PH2	ncbi_113812900	pyx	1.26131848	0.270942174	2.218875717	0	0	pyx	PREDICTED: transient receptor potential cation channel subfamily A member 1-like [Hyalella azteca]	Organismal Systems	Sensory system	ko04750//Inflammatory mediator regulation of TRP channels	K04984	-	-	-
PH2	ncbi_113823802	Grik2	0.514778961	0.113052983	2.186954029	0	0	Grik2	PREDICTED: glutamate receptor ionotropic, kainate 2 isoform X1 [Polistes dominula]	-	-	-	-	-	-	-
PH2	ncbi_113825742	Cpa1	0.971703005	0.237306079	2.033766375	0	0	Cpa1	PREDICTED: carboxypeptidase B-like [Hyalella azteca]	-	-	-	-	-	-	-
PH2	ncbi_113829827	Rab27a	1.111923126	0.271646955	2.03325227	0	0	Rab27a	Rab27A [Macrobrachium rosenbergii]	-	-	-	-	-	-	-
PH2	ncbi_113819328	Ctrc	0.955849689	0.256263382	1.899156423	0	0	Ctrc	prophenoloxidase activating enzyme [Litopenaeus vannamei]	-	-	-	-	-	-	-
PH2	ncbi_113800422	ncbi_113800422	2.145377855	0.594255634	1.852076183	0	0	--	gill C-type lectin [Marsupenaeus japonicus]	-	-	-	-	-	-	-
PH2	ncbi_113829109	His2A	3.456708935	0.962555259	1.844457859	0	0	His2A	PREDICTED: histone H2A-like [Hyalella azteca]	Human Diseases;Cellular Processes;Human Diseases	Substance dependence;Cell growth and death;Immune diseases	ko05034//Alcoholism;ko04217//Necroptosis;ko05322//Systemic lupus erythematosus	K11251;K11251;K11251	GO:0000785//chromatin;GO:0043231//intracellular membrane-bounded organelle	GO:0003676//nucleic acid binding;GO:0046983//protein dimerization activity	GO:0009617//response to bacterium
PH2	ncbi_113809022	ncbi_113809022	2.950920592	0.844479861	1.805030176	0	0	--	-	-	-	-	-	-	-	-
PH2	ncbi_113823668	ncbi_113823668	3.125361336	0.993145167	1.65394648	0	0	--	hypothetical protein [Triatoma infestans]	-	-	-	-	-	-	-
PH2	ncbi_113826594	ncbi_113826594	0.64556735	0.20762412	1.636593561	0	0	--	-	-	-	-	-	-	-	-
PH2	ncbi_113802865	ncbi_113802865	11.86006558	3.818819241	1.634913448	0	0	--	-	-	-	-	-	-	-	-
PH2	ncbi_113822637	Mgst1	2.572254275	0.83994589	1.614664968	0	0	Mgst1	microsomal prostaglandin E synthase [Penaeus monodon]	Human Diseases;Human Diseases;Human Diseases;Metabolism;Metabolism;Organismal Systems;Human Diseases;Human Diseases;Human Diseases;Metabolism;Metabolism	Cancers;Cancers;Cardiovascular diseases;Metabolism of other amino acids;Xenobiotics biodegradation and metabolism;Aging;Drug resistance;Cancers;Cancers;Xenobiotics biodegradation and metabolism;Xenobiotics biodegradation and metabolism	ko05200//Pathways in cancer;ko05225//Hepatocellular carcinoma;ko05418//Fluid shear stress and atherosclerosis;ko00480//Glutathione metabolism;ko00983//Drug metabolism - other enzymes;ko04212//Longevity regulating pathway - worm;ko01524//Platinum drug resistance;ko05215//Prostate cancer;ko05204//Chemical carcinogenesis;ko00980//Metabolism of xenobiotics by cytochrome P450;ko00982//Drug metabolism …	K00799;K00799;K00799;K00799;K00799;K00799;K00799;K00799;K00799;K00799;K00799	-	-	-
PH2	ncbi_113804343	ncbi_113804343	0.585207739	0.200960801	1.542034727	0	0	--	-	-	-	-	-	-	-	-
PH2	ncbi_113826864	ANXA11	1.663865717	0.574881475	1.533202559	0	0	ANXA11	PREDICTED: annexin B9-like isoform X1 [Limulus polyphemus]	-	-	-	-	-	-	-
PH2	ncbi_113799939	SERPINB1	4.201743767	1.466512103	1.518599207	0	0	SERPINB1	serine proteinase inhibitor-3 [Eriocheir sinensis]	Human Diseases	Infectious diseases	ko05146//Amoebiasis	K13963	-	-	-
PH2	ncbi_113805339	PGM2	0.614701525	0.217688127	1.497623341	0	0	PGM2	PREDICTED: glucose 1,6-bisphosphate synthase [Aptenodytes forsteri]	Metabolism;Metabolism;Metabolism;Metabolism;Metabolism;Metabolism;Metabolism	Global and overview maps;Nucleotide metabolism;Carbohydrate metabolism;Carbohydrate metabolism;Carbohydrate metabolism;Carbohydrate metabolism;Carbohydrate metabolism	ko01100//Metabolic pathways;ko00230//Purine metabolism;ko00010//Glycolysis / Gluconeogenesis;ko00520//Amino sugar and nucleotide sugar metabolism;ko00500//Starch and sucrose metabolism;ko00052//Galactose metabolism;ko00030//Pentose phosphate pathway	K15779;K15779;K15779;K15779;K15779;K15779;K15779	-	-	-
PH2	ncbi_113826869	ANXA11	0.640262417	0.231111136	1.470076553	0	0	ANXA11	PREDICTED: annexin A7-like [Hyalella azteca]	-	-	-	-	-	-	-
PH2	ncbi_113819937	ncbi_113819937	80.96115032	29.78710321	1.44254196	0	0	--	-	-	-	-	-	-	-	-
PH2	ncbi_113804209	ncbi_113804209	0.612899343	0.229532476	1.416951868	0	0	--	-	-	-	-	-	-	-	-
PH2	ncbi_113803183	PRDX4	6.332796735	2.44506507	1.372969914	0	0	PRDX4	peroxiredoxin [Litopenaeus vannamei]	Cellular Processes	Cell growth and death	ko04214//Apoptosis - fly	K03386	-	GO:0003824//catalytic activity;GO:0016209//antioxidant activity	GO:0044710//single-organism metabolic process
PH2	ncbi_113817756	ALAD	0.723805117	0.281067859	1.364682819	0	0	ALAD	Delta-aminolevulinic acid dehydratase [Daphnia magna]	Metabolism;Metabolism	Global and overview maps;Metabolism of cofactors and vitamins	ko01100//Metabolic pathways;ko00860//Porphyrin and chlorophyll metabolism	K01698;K01698	-	-	-
PH2	ncbi_113812554	ncbi_113812554	1.852773063	0.739106857	1.32583132	0	0	--	PREDICTED: synaptotagmin-7-like [Limulus polyphemus]	-	-	-	-	-	-	-
PH2	ncbi_113808730	spp27	58.5095792	23.35295174	1.325067929	0	0	spp27	PREDICTED: upstream activation factor subunit spp27-like, partial [Hyalella azteca]	-	-	-	-	-	-	-
PH2	ncbi_113824060	Ssr3	14.88115531	5.983577434	1.314406336	0	0	Ssr3	PREDICTED: translocon-associated protein subunit gamma-like [Hyalella azteca]	Genetic Information Processing	Folding, sorting and degradation	ko04141//Protein processing in endoplasmic reticulum	K13251	GO:0031227//intrinsic component of endoplasmic reticulum membrane	-	GO:0006612//protein targeting to membrane
PH2	ncbi_113808099	ncbi_113808099	2.836356177	1.145049584	1.308628639	0	0	--	PREDICTED: late histone H1-like [Neodiprion lecontei]	-	-	-	-	-	-	-
PH2	ncbi_113809401	SEC61B	15.58528396	6.373799792	1.289958832	0	0	SEC61B	PREDICTED: protein transport protein Sec61 subunit beta [Polistes canadensis]	Genetic Information Processing;Cellular Processes;Human Diseases;Genetic Information Processing	Folding, sorting and degradation;Transport and catabolism;Infectious diseases;Folding, sorting and degradation	ko04141//Protein processing in endoplasmic reticulum;ko04145//Phagosome;ko05110//Vibrio cholerae infection;ko03060//Protein export	K09481;K09481;K09481;K09481	-	-	-
PH2	ncbi_113803440	GILT1	10.97445396	4.505343427	1.284440172	0	0	GILT1	gamma-interferon induced thiol reductase GILT2 [Scylla paramamosain]	-	-	-	-	-	-	-
PH2	ncbi_113826234	Ostc	11.19953815	4.676459816	1.259950543	0	0	Ostc	PREDICTED: oligosaccharyltransferase complex subunit OSTC-like [Hyalella azteca]	-	-	-	-	-	-	-
PH2	ncbi_113809067	ncl1	3.260988579	1.362235644	1.259333102	0	0	ncl1	Nicalin-1 [Crassostrea gigas]	-	-	-	-	-	-	-
PH2	ncbi_113803520	KRTCAP2	9.887802771	4.21558047	1.229918668	0	0	KRTCAP2	keratinocyte associated protein 2 [Litopenaeus vannamei]	-	-	-	-	-	-	-
PH2	ncbi_113820062	Fut1	1.101562999	0.469970433	1.228910104	0	0	Fut1	Galactoside 2-alpha-L-fucosyltransferase 2 [Daphnia magna]	Metabolism;Metabolism;Metabolism	Global and overview maps;Glycan biosynthesis and metabolism;Glycan biosynthesis and metabolism	ko01100//Metabolic pathways;ko00601//Glycosphingolipid biosynthesis - lacto and neolacto series;ko00603//Glycosphingolipid biosynthesis - globo and isoglobo series	K00718;K00718;K00718	-	-	-
PH2	ncbi_113829384	Ubr3	1.730799067	0.74732562	1.211629361	0	0	Ubr3	PREDICTED: E3 ubiquitin-protein ligase UBR3 isoform X3 [Copidosoma floridanum]	-	-	-	-	-	-	-
PH2	ncbi_113805733	ncbi_113805733	42.62435463	18.42162026	1.210278033	0	0	--	-	-	-	-	-	-	-	-
PH2	ncbi_113810485	FKBP2	8.002152256	3.546486931	1.173997448	0	0	FKBP2	PREDICTED: peptidyl-prolyl cis-trans isomerase FKBP2-like [Hyalella azteca]	-	-	-	-	-	GO:0016859//cis-trans isomerase activity	GO:0044267//cellular protein metabolic process
PH2	ncbi_113827277	ncbi_113827277	7.402201556	3.304576353	1.16348909	0	0	--	trap [Procambarus clarkii]	Genetic Information Processing	Folding, sorting and degradation	ko04141//Protein processing in endoplasmic reticulum	K04571	-	-	-
PH2	ncbi_113814459	ncbi_113814459	4.333273744	2.025754726	1.096997872	0	0	--	-	-	-	-	-	-	-	-
PH2	ncbi_113823527	crt	18.63621347	8.715348072	1.096478572	0	0	crt	calreticulin [Litopenaeus vannamei]	Genetic Information Processing;Cellular Processes;Human Diseases;Human Diseases;Human Diseases;Organismal Systems	Folding, sorting and degradation;Transport and catabolism;Infectious diseases;Infectious diseases;Infectious diseases;Immune system	ko04141//Protein processing in endoplasmic reticulum;ko04145//Phagosome;ko05166//HTLV-I infection;ko05163//Human cytomegalovirus infection;ko05142//Chagas disease (American trypanosomiasis);ko04612//Antigen processing and presentation	K08057;K08057;K08057;K08057;K08057;K08057	GO:0043231//intracellular membrane-bounded organelle	GO:0001071//nucleic acid binding transcription factor activity;GO:0003677//DNA binding;GO:0005515//protein binding	GO:0010468//regulation of gene expression;GO:0044267//cellular protein metabolic process
PH2	ncbi_113807959	SSR2	14.13467532	6.630653159	1.092015848	0	0	SSR2	PREDICTED: translocon-associated protein subunit beta-like [Hyalella azteca]	Genetic Information Processing	Folding, sorting and degradation	ko04141//Protein processing in endoplasmic reticulum	K13250	-	-	-
PH2	ncbi_113826646	Cda	21.35486516	10.027206	1.090645123	0	0	Cda	Cytidine deaminase, partial [Daphnia magna]	Metabolism;Metabolism;Metabolism	Global and overview maps;Xenobiotics biodegradation and metabolism;Nucleotide metabolism	ko01100//Metabolic pathways;ko00983//Drug metabolism - other enzymes;ko00240//Pyrimidine metabolism	K01489;K01489;K01489	-	-	-
PH2	ncbi_113804594	ddost	5.317189563	2.506351229	1.085075299	0	0	ddost	PREDICTED: dolichyl-diphosphooligosaccharide--protein glycosyltransferase 48 kDa subunit-like isoform X2 [Hyalella azteca]	Metabolism;Genetic Information Processing;Metabolism	Global and overview maps;Folding, sorting and degradation;Glycan biosynthesis and metabolism	ko01100//Metabolic pathways;ko04141//Protein processing in endoplasmic reticulum;ko00510//N-Glycan biosynthesis	K12670;K12670;K12670	GO:0032991//macromolecular complex;GO:0043231//intracellular membrane-bounded organelle;GO:0044425//membrane part	GO:0016740//transferase activity	GO:0006487//protein N-linked glycosylation;GO:0010033//response to organic substance;GO:0046649//lymphocyte activation
PH2	ncbi_113802009	Ssr1	13.89498786	6.652492328	1.062597728	0	0	Ssr1	PREDICTED: translocon-associated protein subunit alpha [Athalia rosae]	Genetic Information Processing	Folding, sorting and degradation	ko04141//Protein processing in endoplasmic reticulum	K13249	-	-	-
PH2	ncbi_113824615	Tymp	7.183703539	3.517033698	1.030368655	0	0	Tymp	spermatogonial stem-cell renewal factor [Fenneropenaeus chinensis]	Metabolism;Metabolism;Metabolism;Human Diseases	Global and overview maps;Xenobiotics biodegradation and metabolism;Nucleotide metabolism;Cancers	ko01100//Metabolic pathways;ko00983//Drug metabolism - other enzymes;ko00240//Pyrimidine metabolism;ko05219//Bladder cancer	K00758;K00758;K00758;K00758	-	GO:0016763//transferase activity, transferring pentosyl groups	GO:0008152//metabolic process
PH2	ncbi_113828824	eca	7.320800352	3.588078365	1.028789981	0	0	eca	PREDICTED: transmembrane emp24 domain-containing protein eca [Aedes albopictus]	-	-	-	-	GO:0031224//intrinsic component of membrane	-	-
PH2	ncbi_113802431	ncbi_113802431	2.069631189	1.028041461	1.009475251	0	0	--	PREDICTED: LIM domain and actin-binding protein 1 isoform X15 [Cimex lectularius]	-	-	-	-	-	-	-
PH2	ncbi_113816890	TMED6	1.362385294	0.68133518	0.999698161	0	0	TMED6	PREDICTED: transmembrane emp24 domain-containing protein 1-like [Hyalella azteca]	-	-	-	-	-	-	-
PH2	ncbi_113829035	Anp32a	2.040600579	1.021621344	0.998133249	0	0	Anp32a	PREDICTED: acidic leucine-rich nuclear phosphoprotein 32 family member A-like [Hyalella azteca]	-	-	-	-	-	-	-
PH2	ncbi_113816496	ncbi_113816496	3.228485517	1.620048116	0.994820893	0	0	--	PREDICTED: serine/arginine-rich splicing factor 3-like [Hyalella azteca]	-	-	-	-	-	-	-
PH2	ncbi_113804683	cdc-37	2.347544943	1.179545619	0.992921562	0	0	cdc-37	PREDICTED: hsp90 co-chaperone Cdc37 [Vollenhovia emeryi]	Environmental Information Processing	Signal transduction	ko04151//PI3K-Akt signaling pathway	K09554	-	GO:0005515//protein binding;GO:0030295//protein kinase activator activity	GO:0007167//enzyme linked receptor protein signaling pathway;GO:0030154//cell differentiation;GO:0043410//positive regulation of MAPK cascade;GO:0046578//regulation of Ras protein signal transduction
PH2	ncbi_113822795	ncbi_113822795	3.080010937	1.5588133	0.982487328	0	0	--	farnesoic acid O-methyltransferase [Nilaparvata lugens]	-	-	-	-	-	-	-
PH2	ncbi_113817801	RPN2	1.707674113	0.872618415	0.968609858	0	0	RPN2	PREDICTED: dolichyl-diphosphooligosaccharide--protein glycosyltransferase subunit 2-like isoform X2 [Hyalella azteca]	Metabolism;Genetic Information Processing;Metabolism	Global and overview maps;Folding, sorting and degradation;Glycan biosynthesis and metabolism	ko01100//Metabolic pathways;ko04141//Protein processing in endoplasmic reticulum;ko00510//N-Glycan biosynthesis	K12667;K12667;K12667	-	-	-
PH2	ncbi_113802110	RPN1	4.178062664	2.136036141	0.967898073	0	0	RPN1	ribophorin I [Penaeus monodon]	Metabolism;Genetic Information Processing;Metabolism	Global and overview maps;Folding, sorting and degradation;Glycan biosynthesis and metabolism	ko01100//Metabolic pathways;ko04141//Protein processing in endoplasmic reticulum;ko00510//N-Glycan biosynthesis	K12666;K12666;K12666	-	-	-
PH2	ncbi_113805586	ncbi_113805586	1.591597183	0.821053972	0.954926285	0	0	--	PREDICTED: probable palmitoyltransferase ZDHHC24 [Limulus polyphemus]	-	-	-	-	-	-	-
PH2	ncbi_113809629	TMEM258	7.281381388	3.766865323	0.950847724	0	0	TMEM258	PREDICTED: transmembrane protein 258-like [Strongylocentrotus purpuratus]	-	-	-	-	GO:0031224//intrinsic component of membrane	-	-
PH2	ncbi_113805572	Wdr83os	3.995487759	2.068472048	0.949806172	0	0	Wdr83os	PREDICTED: protein Asterix [Copidosoma floridanum]	-	-	-	-	-	-	-
PH2	ncbi_113803030	caz	1.795833032	0.932144573	0.946027587	0	0	caz	PREDICTED: RNA-binding protein cabeza-like isoform X2 [Hyalella azteca]	Human Diseases	Cancers	ko05202//Transcriptional misregulation in cancers	K13098	-	-	-
PH2	ncbi_113816030	SJCHGC01960	3.24893952	1.697672362	0.936410831	0	0	SJCHGC01960	heat shock protein 10 [Penaeus monodon]	-	-	-	-	GO:0044424//intracellular part	-	GO:0044267//cellular protein metabolic process
PH2	ncbi_113804388	CNN3	7.744943451	4.061158511	0.931363367	0	0	CNN3	Calponin-3 [Daphnia magna]	-	-	-	-	-	-	-
PH2	ncbi_113812061	TSPAN3	10.98651843	5.779759363	0.926652942	0	0	TSPAN3	TSPAN8 [Litopenaeus vannamei]	Human Diseases;Cellular Processes	Cancers;Transport and catabolism	ko05205//Proteoglycans in cancer;ko04142//Lysosome	K06497;K06497	-	-	-
PH2	ncbi_113820344	ncbi_113820344	13.29292488	7.039201506	0.917174889	0	0	--	-	-	-	-	-	-	-	-
PH2	ncbi_113829528	Pdi	10.56478281	5.631822567	0.907589321	0	0	Pdi	protein disulfide isomerase [Litopenaeus vannamei]	Genetic Information Processing	Folding, sorting and degradation	ko04141//Protein processing in endoplasmic reticulum	K09580	-	-	-
PH2	ncbi_113828520	ncbi_113828520	16.53122173	8.825513087	0.905441291	0	0	--	-	-	-	-	-	-	-	-
PH2	ncbi_113802172	ncbi_113802172	107.7132384	57.5529456	0.9042339	0	0	--	stylicine 2, partial [Litopenaeus stylirostris]	-	-	-	-	-	-	-
PH2	ncbi_113807651	l(2)k12914	11.13823955	5.959180807	0.9023353	0	0	l(2)k12914	defender against apoptotic death [Marsupenaeus japonicus]	Metabolism;Genetic Information Processing;Metabolism	Global and overview maps;Folding, sorting and degradation;Glycan biosynthesis and metabolism	ko01100//Metabolic pathways;ko04141//Protein processing in endoplasmic reticulum;ko00510//N-Glycan biosynthesis	K12668;K12668;K12668	GO:0031090//organelle membrane;GO:0031224//intrinsic component of membrane;GO:0043231//intracellular membrane-bounded organelle	GO:0003824//catalytic activity	GO:0006464//cellular protein modification process
PH2	ncbi_113818583	LRRC59	4.145526818	2.244262811	0.885313823	0	0	LRRC59	PREDICTED: leucine-rich repeat-containing protein 59-like [Hyalella azteca]	-	-	-	-	-	-	-
PH2	ncbi_113810869	Lsm5	3.216287093	1.785052738	0.849429492	0	0	Lsm5	PREDICTED: U6 snRNA-associated Sm-like protein LSm5 [Hyalella azteca]	Genetic Information Processing;Genetic Information Processing	Transcription;Folding, sorting and degradation	ko03040//Spliceosome;ko03018//RNA degradation	K12624;K12624	-	-	-
PH2	ncbi_113800390	FK506-bp2	13.0919131	7.288682459	0.844945977	0	0	FK506-bp2	PREDICTED: peptidyl-prolyl cis-trans isomerase FKBP1A-like [Priapulus caudatus]	-	-	-	-	-	GO:0016859//cis-trans isomerase activity	GO:0044267//cellular protein metabolic process
PH2	ncbi_113827978	ncbi_113827978	3.900621576	2.17482953	0.842801718	0	0	--	hypothetical protein [Nyssomyia neivai]	-	-	-	-	-	-	-
PH2	ncbi_113823550	Sod2	8.470647181	4.742723267	0.836756509	0	0	Sod2	cytosolic MnSOD [Litopenaeus vannamei]	Human Diseases;Environmental Information Processing;Organismal Systems;Cellular Processes;Environmental Information Processing;Organismal Systems;Organismal Systems	Neurodegenerative diseases;Signal transduction;Aging;Transport and catabolism;Signal transduction;Aging;Aging	ko05016//Huntington disease;ko04013//MAPK signaling pathway - fly;ko04213//Longevity regulating pathway - multiple species;ko04146//Peroxisome;ko04068//FoxO signaling pathway;ko04212//Longevity regulating pathway - worm;ko04211//Longevity regulating pathway - mammal	K04564;K04564;K04564;K04564;K04564;K04564;K04564	-	-	-
PH2	ncbi_113805532	PDIA3	4.967138723	2.800182944	0.826893953	0	0	PDIA3	endoplasmic reticulum protein 57 [Penaeus monodon]	Genetic Information Processing;Human Diseases;Organismal Systems	Folding, sorting and degradation;Infectious diseases;Immune system	ko04141//Protein processing in endoplasmic reticulum;ko05163//Human cytomegalovirus infection;ko04612//Antigen processing and presentation	K08056;K08056;K08056	-	GO:0016740//transferase activity	GO:0008152//metabolic process;GO:0009987//cellular process
PH2	ncbi_113805156	Sec11a	4.434739618	2.519860128	0.815505745	0	0	Sec11a	PREDICTED: signal peptidase complex catalytic subunit SEC11A [Branchiostoma belcheri]	Genetic Information Processing	Folding, sorting and degradation	ko03060//Protein export	K13280	-	-	-
PH2	ncbi_113804226	ncbi_113804226	4.896810396	2.813527347	0.79946235	0	0	--	PREDICTED: CKLF-like MARVEL transmembrane domain-containing protein 4 [Hyalella azteca]	-	-	-	-	-	-	-
PH2	ncbi_113804062	CANX	2.836397519	1.644071724	0.786786501	0	0	CANX	calnexin [Penaeus monodon]	Genetic Information Processing;Cellular Processes;Human Diseases;Organismal Systems;Organismal Systems	Folding, sorting and degradation;Transport and catabolism;Infectious diseases;Endocrine system;Immune system	ko04141//Protein processing in endoplasmic reticulum;ko04145//Phagosome;ko05166//HTLV-I infection;ko04918//Thyroid hormone synthesis;ko04612//Antigen processing and presentation	K08054;K08054;K08054;K08054;K08054	-	-	-
PH2	ncbi_113819894	GPX2	76.385648	44.55399482	0.777746805	0	0	GPX2	glutathione peroxidase [Litopenaeus vannamei]	Human Diseases;Metabolism;Organismal Systems;Metabolism;Human Diseases	Neurodegenerative diseases;Metabolism of other amino acids;Endocrine system;Lipid metabolism;Neurodegenerative diseases	ko05016//Huntington disease;ko00480//Glutathione metabolism;ko04918//Thyroid hormone synthesis;ko00590//Arachidonic acid metabolism;ko05014//Amyotrophic lateral sclerosis (ALS)	K00432;K00432;K00432;K00432;K00432	-	-	-
PH2	ncbi_113826825	ncbi_113826825	3.365611803	1.97213902	0.771107529	0	0	--	-	-	-	-	-	-	-	-
PH2	ncbi_113809019	Tmed7	3.424125928	2.01178927	0.767256566	0	0	Tmed7	PREDICTED: transmembrane emp24 domain-containing protein 7-like [Nasonia vitripennis]	-	-	-	-	GO:0031224//intrinsic component of membrane	-	-
PH2	ncbi_113815403	b4	39.02925325	22.98900506	0.763611831	0	0	b4	PREDICTED: sperm-specific protein PHI-2B/PHI-3-like [Limulus polyphemus]	-	-	-	-	-	-	-
PH2	ncbi_113806297	cyn-5	47.17112824	27.81295266	0.762147196	0	0	cyn-5	PREDICTED: peptidyl-prolyl cis-trans isomerase 5 [Ceratitis capitata]	-	-	-	-	-	GO:0016859//cis-trans isomerase activity	GO:0044267//cellular protein metabolic process
PH2	ncbi_113821069	Tmem14c	2.445969688	1.44950023	0.754850963	0	0	Tmem14c	Transmembrane protein 14C [Daphnia magna]	-	-	-	-	-	-	GO:0050658//RNA transport
PH2	ncbi_113818958	PNP	5.139465724	3.045842305	0.754777141	0	0	PNP	PREDICTED: purine nucleoside phosphorylase-like [Hyalella azteca]	Metabolism;Metabolism;Metabolism;Metabolism	Global and overview maps;Nucleotide metabolism;Nucleotide metabolism;Metabolism of cofactors and vitamins	ko01100//Metabolic pathways;ko00230//Purine metabolism;ko00240//Pyrimidine metabolism;ko00760//Nicotinate and nicotinamide metabolism	K03783;K03783;K03783;K03783	-	-	-
PH2	ncbi_113803034	ncbi_113803034	9.146367131	5.432993521	0.751451503	0	0	--	-	-	-	-	-	-	-	-
PH2	ncbi_113819949	sqd	2.972870264	1.770589755	0.747626526	0	0	sqd	PREDICTED: RNA-binding protein squid-like isoform X6 [Hyalella azteca]	Organismal Systems	Development	ko04320//Dorso-ventral axis formation	K03102	-	-	-
PH2	ncbi_113802179	ncbi_113802179	425.7584261	254.698672	0.741243645	0	0	--	fortilin binding protein 1 [Penaeus monodon]	-	-	-	-	-	-	-
PH2	ncbi_113807495	Bcap29	3.870306741	2.330211891	0.731986763	0	0	Bcap29	PREDICTED: B-cell receptor-associated protein 31-like [Hyalella azteca]	Human Diseases;Genetic Information Processing	Infectious diseases;Folding, sorting and degradation	ko05165//Human papillomavirus infection;ko04141//Protein processing in endoplasmic reticulum	K14009;K14009	-	-	-
PH2	ncbi_113813430	Taldo1	4.639180963	2.796612608	0.7301897	0	0	Taldo1	PREDICTED: transaldolase-like [Hyalella azteca]	Metabolism;Metabolism;Metabolism;Metabolism	Global and overview maps;Global and overview maps;Global and overview maps;Carbohydrate metabolism	ko01100//Metabolic pathways;ko01200//Carbon metabolism;ko01230//Biosynthesis of amino acids;ko00030//Pentose phosphate pathway	K00616;K00616;K00616;K00616	GO:0044424//intracellular part	GO:0016744//transferase activity, transferring aldehyde or ketonic groups	GO:0006739//NADP metabolic process
PH2	ncbi_113820954	SRSF8	6.609606	4.01535426	0.719036998	0	0	SRSF8	PREDICTED: serine/arginine-rich splicing factor 2-like [Hyalella azteca]	Genetic Information Processing;Human Diseases	Transcription;Infectious diseases	ko03040//Spliceosome;ko05168//Herpes simplex infection	K12891;K12891	-	-	-
PH2	ncbi_113820250	CEBPB	3.340228502	2.038365127	0.712534298	0	0	CEBPB	PREDICTED: CCAAT/enhancer-binding protein epsilon-like [Hyalella azteca]	-	-	-	-	-	-	-
PH2	ncbi_113829873	ncbi_113829873	6.344974727	3.933863771	0.689667419	0	0	--	PREDICTED: RNA-binding protein 4.1-like isoform X3 [Parasteatoda tepidariorum]	-	-	-	-	-	-	-
PH2	ncbi_113816281	ncbi_113816281	10.64747325	6.608756553	0.688060348	0	0	--	dTDP-glucose 4,6-dehydratase, partial [Stegodyphus mimosarum]	-	-	-	-	-	-	-
PH2	ncbi_113819413	IscW_ISCW010050	5.446651063	3.399098102	0.680217444	0	0	IscW_ISCW010050	PREDICTED: transcription initiation factor IIA subunit 2 [Papilio polytes]	Human Diseases;Genetic Information Processing	Cancers;Transcription	ko05203//Viral carcinogenesis;ko03022//Basal transcription factors	K03123;K03123	GO:0016591//DNA-directed RNA polymerase II, holoenzyme	-	GO:0006352//DNA-templated transcription, initiation;GO:0010468//regulation of gene expression
PH2	ncbi_113813237	pen-2	4.54857619	2.842139573	0.678437614	0	0	pen-2	presenilin enhancer 2 [Litopenaeus vannamei]	Human Diseases;Environmental Information Processing	Neurodegenerative diseases;Signal transduction	ko05010//Alzheimer disease;ko04330//Notch signaling pathway	K06170;K06170	-	-	-
PH2	ncbi_113807669	SNRPG	4.2503826	2.686509798	0.661859612	0	0	SNRPG	small nuclear ribonucleoprotein polypeptide G [Penaeus monodon]	Genetic Information Processing	Transcription	ko03040//Spliceosome	K11099	GO:0005681//spliceosomal complex;GO:0031981//nuclear lumen;GO:0034708//methyltransferase complex;GO:0044423//virion part;GO:0044444//cytoplasmic part;GO:0097525//spliceosomal snRNP complex	GO:0003723//RNA binding;GO:0003824//catalytic activity	GO:0000377//RNA splicing, via transesterification reactions with bulged adenosine as nucleophile;GO:0006353//DNA-templated transcription, termination;GO:0006397//mRNA processing;GO:0022618//ribonucleoprotein complex assembly;GO:0044710//single-organism metabolic process
PH2	ncbi_113823977	H2A.F/Z	13.96276162	8.878678807	0.653167396	0	0	H2A.F/Z	PREDICTED: histone H2A.V [Cimex lectularius]	Human Diseases;Cellular Processes;Human Diseases	Substance dependence;Cell growth and death;Immune diseases	ko05034//Alcoholism;ko04217//Necroptosis;ko05322//Systemic lupus erythematosus	K11251;K11251;K11251	GO:0031224//intrinsic component of membrane;GO:0043231//intracellular membrane-bounded organelle;GO:0043232//intracellular non-membrane-bounded organelle	GO:0003676//nucleic acid binding;GO:0043169//cation binding;GO:0046983//protein dimerization activity	-
PH2	ncbi_113803561	sqd	10.60546646	6.744279482	0.653071849	0	0	sqd	PREDICTED: RNA-binding protein squid-like isoform X6 [Hyalella azteca]	Organismal Systems	Development	ko04320//Dorso-ventral axis formation	K03102	-	-	-
PH2	ncbi_113818927	Hsc70-3	11.26930521	7.171130574	0.65212608	0	0	Hsc70-3	Bip [Litopenaeus vannamei]	Genetic Information Processing;Organismal Systems;Human Diseases;Organismal Systems;Genetic Information Processing	Folding, sorting and degradation;Endocrine system;Neurodegenerative diseases;Immune system;Folding, sorting and degradation	ko04141//Protein processing in endoplasmic reticulum;ko04918//Thyroid hormone synthesis;ko05020//Prion diseases;ko04612//Antigen processing and presentation;ko03060//Protein export	K09490;K09490;K09490;K09490;K09490	-	GO:0016836//hydro-lyase activity;GO:0043169//cation binding	GO:0006778//porphyrin-containing compound metabolic process;GO:0018130//heterocycle biosynthetic process
PH2	ncbi_113803118	ncbi_113803118	3.121690898	1.990195039	0.649417871	0	0	--	-	-	-	-	-	-	-	-
PH2	ncbi_113808508	Spase22-23	8.133736619	5.186706925	0.649099423	0	0	Spase22-23	PREDICTED: signal peptidase complex subunit 3 [Camponotus floridanus]	Genetic Information Processing	Folding, sorting and degradation	ko03060//Protein export	K12948	-	-	GO:0006508//proteolysis
PH2	ncbi_113826971	Txndc5	5.75214823	3.680127581	0.644345072	0	0	Txndc5	protein disulfide isomerase 1 [Fenneropenaeus chinensis]	Genetic Information Processing	Folding, sorting and degradation	ko04141//Protein processing in endoplasmic reticulum	K13984	-	-	-
PH2	ncbi_113830394	magoh	10.59127163	6.78823015	0.641768431	0	0	magoh	mago-nashi [Penaeus monodon]	Genetic Information Processing;Genetic Information Processing;Genetic Information Processing	Translation;Transcription;Translation	ko03013//RNA transport;ko03040//Spliceosome;ko03015//mRNA surveillance pathway	K12877;K12877;K12877	-	-	-
PH2	ncbi_113818471	Adarb1	25.22172893	16.28405029	0.631207593	0	0	Adarb1	PREDICTED: double-stranded RNA-specific editase 1-like [Hyalella azteca]	-	-	-	-	-	-	-
PH2	ncbi_113810575	ncbi_113810575	4.963253763	3.231346008	0.619150979	0	0	--	protein spaetzle, partial [Cherax quadricarinatus]	Organismal Systems	Immune system	ko04624//Toll and Imd signaling pathway	K20694	-	-	-
PH2	ncbi_113817878	ncbi_113817878	14.90202234	9.729316172	0.615097818	0	0	--	-	-	-	-	-	-	-	-
PH2	ncbi_113821594	TIAL1	5.506445679	3.598866431	0.613578824	0	0	TIAL1	TIA-1-like protein, partial [Scylla paramamosain]	-	-	-	-	-	-	-
PH2	ncbi_113830103	zip	5.292931386	3.467312216	0.610249201	0	0	zip	PREDICTED: myosin heavy chain, non-muscle-like isoform X5 [Hyalella azteca]	Cellular Processes;Cellular Processes;Human Diseases;Organismal Systems	Cell motility;Cellular community - eukaryotes;Infectious diseases;Circulatory system	ko04810//Regulation of actin cytoskeleton;ko04530//Tight junction;ko05132//Salmonella infection;ko04270//Vascular smooth muscle contraction	K10352;K10352;K10352;K10352	-	-	-
PH2	ncbi_113805927	Manf	11.66494644	7.659133053	0.606926677	0	0	Manf	mesencephalic astrocyte-derived neurotrophic factor-like protein [Lasius niger]	-	-	-	-	-	-	-
PH2	ncbi_113809282	ncbi_113809282	8.213091744	5.422950276	0.598847472	0	0	--	EB module family protein [Trichuris trichiura]	-	-	-	-	-	-	-
PH2	ncbi_113823562	Zmat5	10.84107692	7.172298652	0.596000609	0	0	Zmat5	PREDICTED: zinc finger matrin-type protein 5-like [Limulus polyphemus]	-	-	-	-	-	-	-
PH2	ncbi_113802307	Srsf7	7.309460612	4.872395985	0.585133562	0	0	Srsf7	PREDICTED: serine/arginine-rich splicing factor 7-like isoform X2 [Nicrophorus vespilloides]	Genetic Information Processing;Human Diseases	Transcription;Infectious diseases	ko03040//Spliceosome;ko05168//Herpes simplex infection	K12896;K12896	-	-	-
PH2	ncbi_113804610	ncbi_113804610	139.001764	93.39658584	0.573661474	0	0	--	PREDICTED: uncharacterized protein LOC108678985 [Hyalella azteca]	-	-	-	-	-	-	-
PH2	ncbi_113810854	Cct8	5.108836878	3.456120139	0.563841504	0	0	Cct8	PREDICTED: T-complex protein 1 subunit theta-like [Hyalella azteca]	-	-	-	-	GO:0044424//intracellular part	GO:0005515//protein binding;GO:0032550//purine ribonucleoside binding	GO:0044267//cellular protein metabolic process
PH2	ncbi_113829189	RPE	4.774466568	3.242872586	0.558067215	0	0	RPE	PREDICTED: ribulose-phosphate 3-epimerase [Crassostrea gigas]	Metabolism;Metabolism;Metabolism;Metabolism;Metabolism	Global and overview maps;Global and overview maps;Global and overview maps;Carbohydrate metabolism;Carbohydrate metabolism	ko01100//Metabolic pathways;ko01200//Carbon metabolism;ko01230//Biosynthesis of amino acids;ko00040//Pentose and glucuronate interconversions;ko00030//Pentose phosphate pathway	K01783;K01783;K01783;K01783;K01783	-	GO:0016857//racemase and epimerase activity, acting on carbohydrates and derivatives;GO:0043169//cation binding	GO:0006739//NADP metabolic process
PH2	ncbi_113802142	KdelR	5.463835147	3.726153119	0.552226996	0	0	KdelR	PREDICTED: ER lumen protein-retaining receptor 2-like [Limulus polyphemus]	Human Diseases	Infectious diseases	ko05110//Vibrio cholerae infection	K10949	GO:0031224//intrinsic component of membrane;GO:0043231//intracellular membrane-bounded organelle	GO:0046923//ER retention sequence binding	GO:0035437//maintenance of protein localization in endoplasmic reticulum;GO:0048193//Golgi vesicle transport
PH2	ncbi_113817672	Tinagl1	8.998821732	6.153842754	0.548248534	0	0	Tinagl1	PREDICTED: tubulointerstitial nephritis antigen-like [Thamnophis sirtalis]	-	-	-	-	GO:0044421//extracellular region part	-	-
PH2	ncbi_113811859	UBE2L3	4.779493512	3.285515268	0.540738096	0	0	UBE2L3	ubiquitin-conjugating enzyme [Litopenaeus vannamei]	Genetic Information Processing;Human Diseases	Folding, sorting and degradation;Neurodegenerative diseases	ko04120//Ubiquitin mediated proteolysis;ko05012//Parkinson disease	K04552;K04552	-	GO:0003824//catalytic activity	-
PH2	ncbi_113804717	Tmed2	8.504936853	5.861887813	0.536935167	0	0	Tmed2	PREDICTED: transmembrane emp24 domain-containing protein 2-like isoform X1 [Hyalella azteca]	-	-	-	-	-	-	-
PH2	ncbi_113805443	H3f3a	42.07328328	29.21485937	0.526202061	0	0	H3f3a	PREDICTED: histone H3.3 isoform X1 [Nothobranchius furzeri]	Human Diseases;Human Diseases;Human Diseases	Cancers;Substance dependence;Immune diseases	ko05202//Transcriptional misregulation in cancers;ko05034//Alcoholism;ko05322//Systemic lupus erythematosus	K11253;K11253;K11253	GO:0000786//nucleosome;GO:0031981//nuclear lumen;GO:0031988//membrane-bounded vesicle	GO:0000977//RNA polymerase II regulatory region sequence-specific DNA binding;GO:0031490//chromatin DNA binding;GO:0046983//protein dimerization activity	GO:0001558//regulation of cell growth;GO:0006306//DNA methylation;GO:0006334//nucleosome assembly;GO:0006342//chromatin silencing;GO:0006950//response to stress;GO:0007599//hemostasis;GO:0035556//intracellular signal transduction
PH2	ncbi_113820327	eIF1	8.233737288	5.741462177	0.520129223	0	0	eIF1	PREDICTED: protein translation factor SUI1 homolog [Hyalella azteca]	Genetic Information Processing	Translation	ko03013//RNA transport	K03113	-	-	GO:0006412//translation
PH2	ncbi_113802887	ncbi_113802887	4.255282203	2.987094101	0.510512125	0	0	--	-	-	-	-	-	-	-	-
PH2	ncbi_113815521	PMP2	2.087049269	1.475187417	0.500566403	0	0	PMP2	intracellular fatty acid-binding protein [Litopenaeus vannamei]	Organismal Systems	Endocrine system	ko03320//PPAR signaling pathway	K08752	-	-	-
PH2	ncbi_113812602	ATPsynO	11.90649219	8.502966933	0.485710206	0	0	ATPsynO	PREDICTED: ATP synthase subunit O, mitochondrial [Amyelois transitella]	Metabolism;Organismal Systems;Human Diseases;Human Diseases;Human Diseases;Metabolism	Global and overview maps;Environmental adaptation;Neurodegenerative diseases;Neurodegenerative diseases;Neurodegenerative diseases;Energy metabolism	ko01100//Metabolic pathways;ko04714//Thermogenesis;ko05016//Huntington disease;ko05010//Alzheimer disease;ko05012//Parkinson disease;ko00190//Oxidative phosphorylation	K02137;K02137;K02137;K02137;K02137;K02137	-	-	-
PH2	ncbi_113821382	ncbi_113821382	8.518603965	6.190727066	0.460508164	0	0	--	-	-	-	-	-	-	-	-
PH2	ncbi_113803286	ncbi_113803286	15.41589738	11.25616154	0.453703935	0	0	--	Sex-lethal [Eriocheir sinensis]	-	-	-	-	-	-	-
PH2	ncbi_113812043	SKP1	9.093990849	6.668415097	0.44756964	0	0	SKP1	S-phase kinase-associated protein 1 [Eriocheir sinensis]	Human Diseases;Genetic Information Processing;Genetic Information Processing;Cellular Processes;Environmental Information Processing;Human Diseases;Cellular Processes;Environmental Information Processing;Environmental Information Processing;Organismal Systems	Cancers;Folding, sorting and degradation;Folding, sorting and degradation;Cell growth and death;Signal transduction;Infectious diseases;Cell growth and death;Signal transduction;Signal transduction;Environmental adaptation	ko05200//Pathways in cancer;ko04141//Protein processing in endoplasmic reticulum;ko04120//Ubiquitin mediated proteolysis;ko04110//Cell cycle;ko04310//Wnt signaling pathway;ko05168//Herpes simplex infection;ko04114//Oocyte meiosis;ko04350//TGF-beta signaling pathway;ko04341//Hedgehog signaling pathway - fly;ko04710//Circadian rhythm	K03094;K03094;K03094;K03094;K03094;K03094;K03094;K03094;K03094;K03094	-	GO:0016772//transferase activity, transferring phosphorus-containing groups	GO:0006796//phosphate-containing compound metabolic process
PH2	ncbi_113820650	sqh	53.71326075	39.4249661	0.446168791	0	0	sqh	PREDICTED: myosin regulatory light chain sqh-like [Hyalella azteca]	Cellular Processes;Cellular Processes;Cellular Processes;Organismal Systems;Organismal Systems	Cellular community - eukaryotes;Cell motility;Cellular community - eukaryotes;Immune system;Immune system	ko04510//Focal adhesion;ko04810//Regulation of actin cytoskeleton;ko04530//Tight junction;ko04611//Platelet activation;ko04670//Leukocyte transendothelial migration	K12757;K12757;K12757;K12757;K12757	-	-	-
PH2	ncbi_113806074	Mlc-c	54.99088345	40.71791802	0.433528668	0	0	Mlc-c	myosin essential light chain [Eriocheir sinensis]	Cellular Processes;Organismal Systems;Organismal Systems	Cellular community - eukaryotes;Endocrine system;Circulatory system	ko04530//Tight junction;ko04921//Oxytocin signaling pathway;ko04270//Vascular smooth muscle contraction	K12751;K12751;K12751	-	GO:0016628//oxidoreductase activity, acting on the CH-CH group of donors, NAD or NADP as acceptor	GO:0044710//single-organism metabolic process
PH2	ncbi_113817924	CYPA	81.57024302	60.69043898	0.426573694	0	0	CYPA	cyclophilin A [Litopenaeus vannamei]	Human Diseases;Environmental Information Processing;Human Diseases;Environmental Information Processing;Human Diseases	Neurodegenerative diseases;Signal transduction;Neurodegenerative diseases;Signal transduction;Infectious diseases	ko05016//Huntington disease;ko04022//cGMP - PKG signaling pathway;ko05012//Parkinson disease;ko04020//Calcium signaling pathway;ko05145//Toxoplasmosis	K09565;K09565;K09565;K09565;K09565	-	-	-
PH2	ncbi_113812468	ARF1	19.99813652	14.91389911	0.423208085	0	0	ARF1	PREDICTED: ADP-ribosylation factor 1 [Papilio polytes]	Cellular Processes;Human Diseases;Environmental Information Processing;Human Diseases	Transport and catabolism;Infectious diseases;Signal transduction;Infectious diseases	ko04144//Endocytosis;ko05110//Vibrio cholerae infection;ko04072//Phospholipase D signaling pathway;ko05134//Legionellosis	K07937;K07937;K07937;K07937	GO:0005794//Golgi apparatus	GO:0017111//nucleoside-triphosphatase activity;GO:0032550//purine ribonucleoside binding	GO:0001505//regulation of neurotransmitter levels;GO:0001654//eye development;GO:0006486//protein glycosylation;GO:0007265//Ras protein signal transduction;GO:0022604//regulation of cell morphogenesis;GO:0022610//biological adhesion;GO:0030100//regulation of endocytosis;GO:0048193//Golgi vesicle transport;GO:1901532//regulation of hematopoietic progenitor cell differentiation
PH2	ncbi_113825948	ncbi_113825948	29.63727641	22.47889878	0.398841513	0	0	--	-	-	-	-	-	-	-	-
PH2	ncbi_113816740	COPE	5.462248176	3.856727725	0.502117565	3.40E-301	9.10E-297	COPE	coatomer subunit epsilon [Fenneropenaeus chinensis]	-	-	-	-	-	-	-
PH2	ncbi_113800167	PIN1	3.260778835	2.192243629	0.572808455	1.39E-298	3.73E-294	PIN1	Peptidyl-prolyl cis-trans isomerase NIMA-interacting [Daphnia magna]	Organismal Systems	Immune system	ko04622//RIG-I-like receptor signaling pathway	K09578	-	GO:0016859//cis-trans isomerase activity	-
PH2	ncbi_113803628	SmD3	5.925410656	4.212526271	0.492229459	1.07E-296	2.86E-292	SmD3	small nuclear ribonucleoprotein SM D3 (snRNP core protein D3) (SM-D3)-like protein, partial [Scylla paramamosain]	Genetic Information Processing;Human Diseases	Transcription;Immune diseases	ko03040//Spliceosome;ko05322//Systemic lupus erythematosus	K11088;K11088	-	-	-
PH2	ncbi_113822943	LYPLA1	4.266874476	2.933622265	0.540496549	1.17E-296	3.14E-292	LYPLA1	PREDICTED: acyl-protein thioesterase 1-like [Hyalella azteca]	Metabolism	Lipid metabolism	ko00564//Glycerophospholipid metabolism	K06130	-	GO:0003824//catalytic activity	-
PH2	ncbi_113800052	stg	2.255179643	1.357747885	0.732026745	1.99E-296	5.32E-292	stg	PREDICTED: M-phase inducer phosphatase-like, partial [Hyalella azteca]	-	-	-	-	-	-	-
PH2	ncbi_113814993	SMARCC2	2.544454092	1.56420735	0.701924394	9.86E-296	2.64E-291	SMARCC2	SWI/SNF complex subunit SMARCC2 [Zootermopsis nevadensis]	Organismal Systems;Human Diseases	Environmental adaptation;Cancers	ko04714//Thermogenesis;ko05225//Hepatocellular carcinoma	K11649;K11649	-	-	-
PH2	ncbi_113818122	ergic1	1.572107983	0.824638503	0.930866586	6.42E-295	1.72E-290	ergic1	PREDICTED: endoplasmic reticulum-Golgi intermediate compartment protein 1-like [Hyalella azteca]	-	-	-	-	GO:0031090//organelle membrane;GO:0043231//intracellular membrane-bounded organelle;GO:0044425//membrane part	-	GO:0006810//transport
PH2	ncbi_113814234	ncbi_113814234	2.267722381	1.358292635	0.739449701	1.16E-294	3.11E-290	--	-	-	-	-	-	-	-	-
PH2	ncbi_113819739	CCT4	3.258529346	2.041949979	0.674273462	2.86E-294	7.65E-290	CCT4	PREDICTED: T-complex protein 1 subunit delta-like [Hyalella azteca]	-	-	-	-	-	-	-
PH2	ncbi_113820197	Agrn	0.634065745	0.25621354	1.307285722	4.63E-294	1.24E-289	Agrn	Agrin [Exaiptasia pallida]	Environmental Information Processing	Signaling molecules and interaction	ko04512//ECM-receptor interaction	K06254	-	-	-
PH2	ncbi_113800045	ncbi_113800045	4.520377218	3.054644834	0.565438522	1.11E-291	2.96E-287	--	-	-	-	-	-	-	-	-
PH2	ncbi_113822103	adrm1b	4.350739293	2.938036707	0.566408149	2.94E-290	7.88E-286	adrm1b	adhesion regulating molecule 1 [Scylla paramamosain]	Human Diseases;Genetic Information Processing	Infectious diseases;Folding, sorting and degradation	ko05169//Epstein-Barr virus infection;ko03050//Proteasome	K06691;K06691	-	-	-
PH2	ncbi_113829954	STT3A	1.41426841	0.756548312	0.902551832	9.90E-290	2.65E-285	STT3A	PREDICTED: dolichyl-diphosphooligosaccharide--protein glycosyltransferase subunit STT3A-like [Hyalella azteca]	Metabolism;Genetic Information Processing;Metabolism	Global and overview maps;Folding, sorting and degradation;Glycan biosynthesis and metabolism	ko01100//Metabolic pathways;ko04141//Protein processing in endoplasmic reticulum;ko00510//N-Glycan biosynthesis	K07151;K07151;K07151	GO:0044425//membrane part	GO:0004576//oligosaccharyl transferase activity	GO:0006487//protein N-linked glycosylation
PH2	ncbi_113828887	Ars2	2.316559124	1.409655903	0.71664046	6.07E-288	1.63E-283	Ars2	arsenite-resistance protein 2-like protein [Litopenaeus vannamei]	-	-	-	-	-	-	-
PH2	ncbi_113828057	ncbi_113828057	1.127734052	0.57271441	0.977539076	7.55E-288	2.02E-283	--	PREDICTED: microtubule-associated protein Jupiter-like isoform X1 [Halyomorpha halys]	-	-	-	-	-	-	-
PH2	ncbi_113807528	Cth	0.676572319	0.296411018	1.190645078	9.89E-284	2.65E-279	Cth	Cystathionine gamma-lyase [Daphnia magna]	Metabolism;Metabolism;Metabolism;Metabolism;Metabolism	Global and overview maps;Global and overview maps;Amino acid metabolism;Amino acid metabolism;Metabolism of other amino acids	ko01100//Metabolic pathways;ko01230//Biosynthesis of amino acids;ko00260//Glycine, serine and threonine metabolism;ko00270//Cysteine and methionine metabolism;ko00450//Selenocompound metabolism	K01758;K01758;K01758;K01758;K01758	-	-	-
PH2	ncbi_113827332	Tktl2	4.307120343	3.045514764	0.500037535	2.19E-283	5.87E-279	Tktl2	PREDICTED: transketolase-like isoform X1 [Hyalella azteca]	Metabolism;Metabolism;Metabolism;Metabolism	Global and overview maps;Global and overview maps;Global and overview maps;Carbohydrate metabolism	ko01100//Metabolic pathways;ko01200//Carbon metabolism;ko01230//Biosynthesis of amino acids;ko00030//Pentose phosphate pathway	K00615;K00615;K00615;K00615	-	-	-
PH2	ncbi_113803474	sn	1.811014374	1.043670379	0.795131857	8.95E-283	2.40E-278	sn	PREDICTED: protein singed-like isoform X1 [Hyalella azteca]	Human Diseases	Cancers	ko05206//MicroRNAs in cancer	K17455	-	GO:0003779//actin binding	-
PH2	ncbi_113814264	EMC4	1.770285929	1.027229955	0.785223219	5.51E-278	1.48E-273	EMC4	PREDICTED: ER membrane protein complex subunit 4 [Halyomorpha halys]	-	-	-	-	-	-	-
PH2	ncbi_113815875	Snap25	2.647459704	1.674953023	0.660488092	1.16E-276	3.11E-272	Snap25	synaptosome-associated protein of 25 kDa [Procambarus clarkii]	Organismal Systems;Organismal Systems	Endocrine system;Nervous system	ko04911//Insulin secretion;ko04721//Synaptic vesicle cycle	K18211;K18211	-	-	-
PH2	ncbi_113809721	ncbi_113809721	2.258356154	1.283384143	0.815319961	5.73E-274	1.54E-269	--	PREDICTED: dolichol-phosphate mannosyltransferase subunit 3-like [Hyalella azteca]	Metabolism;Metabolism	Global and overview maps;Glycan biosynthesis and metabolism	ko01100//Metabolic pathways;ko00510//N-Glycan biosynthesis	K09659;K09659	-	-	-
PH2	ncbi_113810842	SmD1	4.020967917	2.763739381	0.540921248	2.22E-273	5.93E-269	SmD1	AGAP007246-PA [Anopheles gambiae str. PEST] [Anopheles gambiae]	Genetic Information Processing;Human Diseases	Transcription;Immune diseases	ko03040//Spliceosome;ko05322//Systemic lupus erythematosus	K11087;K11087	GO:0005681//spliceosomal complex;GO:0044444//cytoplasmic part	-	GO:0000377//RNA splicing, via transesterification reactions with bulged adenosine as nucleophile
PH2	ncbi_113810046	HADH	1.986878355	1.175390469	0.757363442	2.96E-273	7.94E-269	HADH	PREDICTED: hydroxyacyl-coenzyme A dehydrogenase, mitochondrial-like [Lingula anatina]	Metabolism;Metabolism;Metabolism;Metabolism;Metabolism;Metabolism;Metabolism;Metabolism	Global and overview maps;Amino acid metabolism;Amino acid metabolism;Lipid metabolism;Global and overview maps;Amino acid metabolism;Carbohydrate metabolism;Lipid metabolism	ko01100//Metabolic pathways;ko00310//Lysine degradation;ko00280//Valine, leucine and isoleucine degradation;ko00071//Fatty acid degradation;ko01212//Fatty acid metabolism;ko00380//Tryptophan metabolism;ko00650//Butanoate metabolism;ko00062//Fatty acid elongation	K00022;K00022;K00022;K00022;K00022;K00022;K00022;K00022	-	GO:0016614//oxidoreductase activity, acting on CH-OH group of donors;GO:0043168//anion binding;GO:0048037//cofactor binding	GO:0032787//monocarboxylic acid metabolic process
PH2	ncbi_113820949	SRSF2	4.944458476	3.427157264	0.528800129	7.81E-272	2.09E-267	SRSF2	Splicing factor, arginine/serine-rich 2 [Zootermopsis nevadensis]	Genetic Information Processing;Human Diseases	Transcription;Infectious diseases	ko03040//Spliceosome;ko05168//Herpes simplex infection	K12891;K12891	-	GO:0097159//organic cyclic compound binding	-
PH2	ncbi_113811228	ncbi_113811228	10.34184897	7.901949408	0.388213627	3.44E-271	9.22E-267	--	Similar to CG4692 [Heliconius melpomene]	Metabolism;Organismal Systems;Metabolism	Global and overview maps;Environmental adaptation;Energy metabolism	ko01100//Metabolic pathways;ko04714//Thermogenesis;ko00190//Oxidative phosphorylation	K02130;K02130;K02130	-	-	-
PH2	ncbi_113818823	TAF15	2.7202079	1.718117042	0.662888599	1.57E-270	4.20E-266	TAF15	PREDICTED: RNA-binding protein cabeza-like isoform X3 [Hyalella azteca]	Human Diseases	Cancers	ko05202//Transcriptional misregulation in cancers	K13098	-	-	-
PH2	ncbi_113801008	RS2Z33	6.7941171	4.997550072	0.443065062	1.82E-269	4.88E-265	RS2Z33	PREDICTED: serine/arginine-rich-splicing factor SR34-like isoform X2 [Hyalella azteca]	Genetic Information Processing;Human Diseases	Transcription;Infectious diseases	ko03040//Spliceosome;ko05168//Herpes simplex infection	K12896;K12896	-	-	-
PH2	ncbi_113823755	ARPC3	4.694330104	3.347485891	0.487841321	5.33E-269	1.43E-264	ARPC3	Actin-related protein 2/3 complex subunit 3 [Zootermopsis nevadensis]	Cellular Processes;Cellular Processes;Human Diseases;Human Diseases;Human Diseases;Human Diseases;Organismal Systems	Cell motility;Transport and catabolism;Infectious diseases;Infectious diseases;Infectious diseases;Infectious diseases;Immune system	ko04810//Regulation of actin cytoskeleton;ko04144//Endocytosis;ko05130//Pathogenic Escherichia coli infection;ko05131//Shigellosis;ko05132//Salmonella infection;ko05100//Bacterial invasion of epithelial cells;ko04666//Fc gamma R-mediated phagocytosis	K05756;K05756;K05756;K05756;K05756;K05756;K05756	GO:0043232//intracellular non-membrane-bounded organelle	-	GO:0030833//regulation of actin filament polymerization
PH2	ncbi_113809417	rap1b	5.426114666	3.841986748	0.498066993	9.28E-269	2.48E-264	rap1b	Rap GTPase [Marsupenaeus japonicus]	Cellular Processes;Cellular Processes;Environmental Information Processing;Organismal Systems;Environmental Information Processing;Organismal Systems;Environmental Information Processing;Environmental Information Processing;Organismal Systems;Human Diseases;Organismal Systems;Organismal Systems;Human Diseases;Organismal Systems	Cellular community - eukaryotes;Cellular community - eukaryotes;Signal transduction;Immune system;Signal transduction;Digestive system;Signal transduction;Signal transduction;Immune system;Endocrine and metabolic diseases;Immune system;Nervous system;Cancers;Nervous system	ko04510//Focal adhesion;ko04530//Tight junction;ko04015//Rap1 signaling pathway;ko04611//Platelet activation;ko04010//MAPK signaling pathway;ko04972//Pancreatic secretion;ko04024//cAMP signaling pathway;ko04014//Ras signaling pathway;ko04670//Leukocyte transendothelial migration;ko04934//Cushing syndrome;ko04062//Chemokine signaling pathway;ko04722//Neurotrophin signaling pathway;ko05211//Renal c…	K04353;K04353;K04353;K04353;K04353;K04353;K04353;K04353;K04353;K04353;K04353;K04353;K04353;K04353	-	-	-
PH2	ncbi_113804311	mmgt1	5.148485027	3.716284643	0.470286966	6.81E-268	1.82E-263	mmgt1	Membrane magnesium transporter 1-B [Zootermopsis nevadensis]	-	-	-	-	-	-	-
PH2	ncbi_113814365	PPAF1	1.126340559	0.559974876	1.008209098	1.78E-264	4.76E-260	PPAF1	Chymotrypsin-C [Daphnia magna]	-	-	-	-	-	-	-
PH2	ncbi_113819094	Cdc37	1.379376177	0.763078894	0.854111828	1.53E-263	4.10E-259	Cdc37	PREDICTED: hsp90 co-chaperone Cdc37 [Anoplophora glabripennis]	Environmental Information Processing	Signal transduction	ko04151//PI3K-Akt signaling pathway	K09554	-	-	GO:0044763//single-organism cellular process
PH2	ncbi_113805414	ncbi_113805414	3.990464156	2.81884486	0.501452487	2.11E-261	5.66E-257	--	-	-	-	-	-	-	-	-
PH2	ncbi_113828698	B52	1.793199625	1.076897269	0.735655473	7.61E-261	2.04E-256	B52	PREDICTED: serine-arginine protein 55 isoform X11 [Dinoponera quadriceps]	Genetic Information Processing;Human Diseases	Transcription;Infectious diseases	ko03040//Spliceosome;ko05168//Herpes simplex infection	K12893;K12893	-	-	-
PH2	ncbi_113824224	Zmat2	2.43542682	1.547886219	0.653875207	1.32E-259	3.54E-255	Zmat2	PREDICTED: zinc finger matrin-type protein 2 [Oryzias latipes]	Genetic Information Processing	Transcription	ko03040//Spliceosome	K12848	GO:0043231//intracellular membrane-bounded organelle	GO:0003676//nucleic acid binding;GO:0046914//transition metal ion binding	-
PH2	ncbi_113806425	ncbi_113806425	0.958267591	0.507039273	0.918331081	3.35E-259	8.97E-255	--	-	-	-	-	-	-	-	-
PH2	ncbi_113819549	boca	1.95370348	1.15012305	0.764423301	1.93E-258	5.16E-254	boca	LDLR chaperone boca [Daphnia magna]	-	-	-	-	-	-	-
PH2	ncbi_113804281	Dsp1	5.798765559	3.998780699	0.536185649	3.24E-258	8.69E-254	Dsp1	HMGBb [Litopenaeus vannamei]	Cellular Processes;Cellular Processes;Genetic Information Processing	Cell growth and death;Transport and catabolism;Replication and repair	ko04217//Necroptosis;ko04140//Autophagy - animal;ko03410//Base excision repair	K10802;K10802;K10802	-	GO:0004672//protein kinase activity;GO:0032550//purine ribonucleoside binding	GO:0006464//cellular protein modification process
PH2	ncbi_113802507	GDI1	5.174752435	3.717963733	0.476977147	1.21E-256	3.24E-252	GDI1	PREDICTED: rab GDP dissociation inhibitor alpha-like [Hyalella azteca]	-	-	-	-	-	-	-
PH2	ncbi_113821859	Cacybp	2.751461652	1.852141213	0.571004123	3.78E-253	1.01E-248	Cacybp	PREDICTED: calcyclin-binding protein [Cephus cinctus]	Environmental Information Processing	Signal transduction	ko04310//Wnt signaling pathway	K04507	-	-	-
PH2	ncbi_113808990	Srprb	0.810277172	0.385234733	1.072677711	8.86E-252	2.37E-247	Srprb	PREDICTED: signal recognition particle receptor subunit beta-like [Aplysia californica]	Genetic Information Processing	Folding, sorting and degradation	ko03060//Protein export	K12272	-	-	-
PH2	ncbi_113825494	LAMTOR2	3.657781411	2.554442147	0.5179606	3.63E-249	9.71E-245	LAMTOR2	Mitogen-activated protein-binding protein-interacting protein [Zootermopsis nevadensis]	Environmental Information Processing	Signal transduction	ko04150//mTOR signaling pathway	K20398	-	-	-
PH2	ncbi_113801184	ncbi_113801184	3.618838087	2.530561452	0.516069052	6.12E-249	1.64E-244	--	NADH dehydrogenase [ubiquinone] 1 beta subcomplex subunit 4 [Zootermopsis nevadensis]	Metabolism;Organismal Systems;Human Diseases;Human Diseases;Human Diseases;Human Diseases;Metabolism;Organismal Systems	Global and overview maps;Environmental adaptation;Neurodegenerative diseases;Neurodegenerative diseases;Endocrine and metabolic diseases;Neurodegenerative diseases;Energy metabolism;Nervous system	ko01100//Metabolic pathways;ko04714//Thermogenesis;ko05016//Huntington disease;ko05010//Alzheimer disease;ko04932//Non-alcoholic fatty liver disease (NAFLD);ko05012//Parkinson disease;ko00190//Oxidative phosphorylation;ko04723//Retrograde endocannabinoid signaling	K03960;K03960;K03960;K03960;K03960;K03960;K03960;K03960	-	GO:0016491//oxidoreductase activity	-
PH2	ncbi_113822456	ncbi_113822456	2.10494577	1.350666385	0.640111692	3.93E-248	1.05E-243	--	-	-	-	-	-	-	-	-
PH2	ncbi_113810270	CCT7	3.323653539	2.282633976	0.542070462	1.50E-247	4.02E-243	CCT7	chaperonin [Macrobrachium rosenbergii]	-	-	-	-	GO:0015630//microtubule cytoskeleton;GO:0031988//membrane-bounded vesicle;GO:0043231//intracellular membrane-bounded organelle;GO:0043234//protein complex	GO:0005515//protein binding;GO:0032550//purine ribonucleoside binding	GO:0006810//transport;GO:0035036//sperm-egg recognition;GO:0044267//cellular protein metabolic process
PH2	ncbi_113830028	ncbi_113830028	0.786893598	0.443002306	0.828854361	1.50E-247	4.03E-243	--	PREDICTED: calphotin-like isoform X6 [Lates calcarifer]	-	-	-	-	-	-	-
PH2	ncbi_113820643	ncbi_113820643	3.109753477	2.07514266	0.583589695	4.26E-245	1.14E-240	--	-	-	-	-	-	-	-	-
PH2	ncbi_113806043	HSP90AA1	19.19476084	10.4472636	0.877587471	1.16E-244	3.09E-240	HSP90AA1	heat shock protein 90 [Palaemon carinicauda]	Human Diseases;Genetic Information Processing;Environmental Information Processing;Human Diseases;Cellular Processes;Human Diseases;Organismal Systems;Organismal Systems;Organismal Systems;Organismal Systems;Organismal Systems;Organismal Systems	Cancers;Folding, sorting and degradation;Signal transduction;Cardiovascular diseases;Cell growth and death;Cancers;Immune system;Endocrine system;Endocrine system;Immune system;Immune system;Immune system	ko05200//Pathways in cancer;ko04141//Protein processing in endoplasmic reticulum;ko04151//PI3K-Akt signaling pathway;ko05418//Fluid shear stress and atherosclerosis;ko04217//Necroptosis;ko05215//Prostate cancer;ko04621//NOD-like receptor signaling pathway;ko04914//Progesterone-mediated oocyte maturation;ko04915//Estrogen signaling pathway;ko04612//Antigen processing and presentation;ko04657//IL-1…	K04079;K04079;K04079;K04079;K04079;K04079;K04079;K04079;K04079;K04079;K04079;K04079	-	-	-
PH2	ncbi_113806642	Tusc3	1.277582801	0.713474122	0.840483787	1.61E-243	4.31E-239	Tusc3	PREDICTED: tumor suppressor candidate 3-like [Hyalella azteca]	Metabolism;Genetic Information Processing;Metabolism	Global and overview maps;Folding, sorting and degradation;Glycan biosynthesis and metabolism	ko01100//Metabolic pathways;ko04141//Protein processing in endoplasmic reticulum;ko00510//N-Glycan biosynthesis	K12669;K12669;K12669	-	-	-
PH2	ncbi_113816086	Agrn	2.738786659	1.594107751	0.780787741	2.41E-243	6.45E-239	Agrn	Kazal-type serine proteinase inhibitor 2 [Fenneropenaeus chinensis]	Environmental Information Processing	Signaling molecules and interaction	ko04512//ECM-receptor interaction	K06254	-	-	-
PH2	ncbi_113825161	CYCS	5.923639712	4.220322549	0.489130631	9.16E-242	2.45E-237	CYCS	cytochrome c [Litopenaeus vannamei]	Human Diseases;Cellular Processes;Human Diseases;Human Diseases;Human Diseases;Human Diseases;Cellular Processes;Human Diseases;Human Diseases;Human Diseases;Human Diseases;Human Diseases;Human Diseases;Human Diseases;Human Diseases;Human Diseases;Human Diseases;Human Diseases;Cellular Processes;Human Diseases;Human Diseases;Cellular Processes	Cancers;Cell growth and death;Neurodegenerative diseases;Infectious diseases;Neurodegenerative diseases;Cardiovascular diseases;Cell growth and death;Endocrine and metabolic diseases;Neurodegenerative diseases;Infectious diseases;Infectious diseases;Infectious diseases;Drug resistance;Infectious diseases;Cancers;Infectious diseases;Infectious diseases;Cancers;Cell growth and death;Infectious dise…	ko05200//Pathways in cancer;ko04210//Apoptosis;ko05016//Huntington disease;ko05164//Influenza A;ko05010//Alzheimer disease;ko05416//Viral myocarditis;ko04214//Apoptosis - fly;ko04932//Non-alcoholic fatty liver disease (NAFLD);ko05012//Parkinson disease;ko05152//Tuberculosis;ko05168//Herpes simplex infection;ko05163//Human cytomegalovirus infection;ko01524//Platinum drug resistance;ko05145//Toxopl…	K08738;K08738;K08738;K08738;K08738;K08738;K08738;K08738;K08738;K08738;K08738;K08738;K08738;K08738;K08738;K08738;K08738;K08738;K08738;K08738;K08738;K08738	-	-	-
PH2	ncbi_113803802	TSTA3	1.06929354	0.582489737	0.876353416	4.74E-241	1.27E-236	TSTA3	PREDICTED: GDP-L-fucose synthase isoform X1 [Nanorana parkeri]	Metabolism;Metabolism;Metabolism	Global and overview maps;Carbohydrate metabolism;Carbohydrate metabolism	ko01100//Metabolic pathways;ko00520//Amino sugar and nucleotide sugar metabolism;ko00051//Fructose and mannose metabolism	K02377;K02377;K02377	-	GO:0016616//oxidoreductase activity, acting on the CH-OH group of donors, NAD or NADP as acceptor;GO:0048037//cofactor binding	GO:0042350//GDP-L-fucose biosynthetic process
PH2	ncbi_113826962	CCT5	6.396042839	4.758898767	0.426551836	5.65E-237	1.51E-232	CCT5	Cct5-prov protein [Daphnia magna]	-	-	-	-	GO:0005815//microtubule organizing center;GO:0031988//membrane-bounded vesicle;GO:0043234//protein complex	GO:0005515//protein binding;GO:0032550//purine ribonucleoside binding	GO:0006810//transport;GO:0035036//sperm-egg recognition;GO:0044267//cellular protein metabolic process;GO:0044707//single-multicellular organism process;GO:0051707//response to other organism
PH2	ncbi_113821217	Prosbeta6	8.874933164	6.876685559	0.368022876	5.18E-235	1.39E-230	Prosbeta6	PREDICTED: proteasome subunit beta type-1-like [Hyalella azteca]	Genetic Information Processing	Folding, sorting and degradation	ko03050//Proteasome	K02732	-	-	-
PH2	ncbi_113806042	HSP90AA1	2.322384117	1.062008407	1.128811423	1.17E-234	3.13E-230	HSP90AA1	heat shock protein 90 [Eriocheir sinensis]	Human Diseases;Genetic Information Processing;Environmental Information Processing;Human Diseases;Cellular Processes;Human Diseases;Organismal Systems;Organismal Systems;Organismal Systems;Organismal Systems;Organismal Systems;Organismal Systems	Cancers;Folding, sorting and degradation;Signal transduction;Cardiovascular diseases;Cell growth and death;Cancers;Immune system;Endocrine system;Endocrine system;Immune system;Immune system;Immune system	ko05200//Pathways in cancer;ko04141//Protein processing in endoplasmic reticulum;ko04151//PI3K-Akt signaling pathway;ko05418//Fluid shear stress and atherosclerosis;ko04217//Necroptosis;ko05215//Prostate cancer;ko04621//NOD-like receptor signaling pathway;ko04914//Progesterone-mediated oocyte maturation;ko04915//Estrogen signaling pathway;ko04612//Antigen processing and presentation;ko04657//IL-1…	K04079;K04079;K04079;K04079;K04079;K04079;K04079;K04079;K04079;K04079;K04079;K04079	-	-	-
PH2	ncbi_113811523	B52	2.339048347	1.509865618	0.631501529	1.25E-234	3.34E-230	B52	hnRNP protein, partial [Cherax quadricarinatus]	Genetic Information Processing;Human Diseases	Transcription;Infectious diseases	ko03040//Spliceosome;ko05168//Herpes simplex infection	K12893;K12893	-	GO:0003676//nucleic acid binding	GO:0048024//regulation of mRNA splicing, via spliceosome
PH2	ncbi_113810169	ZK1073.1	3.626371682	2.622502902	0.467582431	2.64E-232	7.08E-228	ZK1073.1	n-myc downstream regulated [Daphnia magna]	-	-	-	-	-	-	-
PH2	ncbi_113812683	ncbi_113812683	1.338655205	0.754789706	0.826637764	1.80E-229	4.82E-225	--	PREDICTED: uncharacterized protein LOC108672531 isoform X1 [Hyalella azteca]	-	-	-	-	-	-	-
PH2	ncbi_113804219	cript	1.657786145	1.040403547	0.672114688	1.18E-228	3.15E-224	cript	PREDICTED: cysteine-rich PDZ-binding protein-like [Hyalella azteca]	-	-	-	-	-	-	-
PH2	ncbi_113814402	csnk2b	7.448322984	5.783678266	0.364928334	3.95E-228	1.06E-223	csnk2b	PREDICTED: casein kinase II subunit beta isoform X1 [Orussus abietinus]	Cellular Processes;Human Diseases;Environmental Information Processing;Human Diseases;Genetic Information Processing;Human Diseases;Environmental Information Processing;Cellular Processes	Cellular community - eukaryotes;Infectious diseases;Signal transduction;Infectious diseases;Translation;Infectious diseases;Signal transduction;Transport and catabolism	ko04520//Adherens junction;ko05169//Epstein-Barr virus infection;ko04310//Wnt signaling pathway;ko05168//Herpes simplex infection;ko03008//Ribosome biogenesis in eukaryotes;ko05162//Measles;ko04064//NF-kappa B signaling pathway;ko04137//Mitophagy - animal	K03115;K03115;K03115;K03115;K03115;K03115;K03115;K03115	-	GO:0019207//kinase regulator activity	GO:0001932//regulation of protein phosphorylation
PH2	ncbi_113803517	daf-41	0.868991396	0.469954838	0.886819771	1.78E-227	4.76E-223	daf-41	P23 [Litopenaeus vannamei]	Metabolism;Metabolism	Global and overview maps;Lipid metabolism	ko01100//Metabolic pathways;ko00590//Arachidonic acid metabolism	K15730;K15730	-	-	-
PH2	ncbi_113804316	tmem147	2.10977805	1.373378799	0.619361637	2.06E-226	5.51E-222	tmem147	PREDICTED: transmembrane protein 147-like [Hyalella azteca]	-	-	-	-	-	-	-
PH2	ncbi_113818649	Pka-R2	2.501983252	1.695922931	0.561001523	2.52E-226	6.75E-222	Pka-R2	PREDICTED: cAMP-dependent protein kinase type II regulatory subunit-like [Hyalella azteca]	-	-	-	-	GO:0044424//intracellular part	GO:0019887//protein kinase regulator activity	GO:0001932//regulation of protein phosphorylation
PH2	ncbi_113818890	Sf3b5	1.555232304	0.94146421	0.724151934	3.44E-226	9.21E-222	Sf3b5	PREDICTED: probable splicing factor 3B subunit 5 [Hyalella azteca]	Genetic Information Processing	Transcription	ko03040//Spliceosome	K12832	-	-	-
PH2	ncbi_113812024	NDUFS6	3.398241329	2.45593315	0.468517019	1.48E-225	3.98E-221	NDUFS6	PREDICTED: NADH dehydrogenase [ubiquinone] iron-sulfur protein 6, mitochondrial [Copidosoma floridanum]	Metabolism;Organismal Systems;Human Diseases;Human Diseases;Human Diseases;Human Diseases;Metabolism;Organismal Systems	Global and overview maps;Environmental adaptation;Neurodegenerative diseases;Neurodegenerative diseases;Endocrine and metabolic diseases;Neurodegenerative diseases;Energy metabolism;Nervous system	ko01100//Metabolic pathways;ko04714//Thermogenesis;ko05016//Huntington disease;ko05010//Alzheimer disease;ko04932//Non-alcoholic fatty liver disease (NAFLD);ko05012//Parkinson disease;ko00190//Oxidative phosphorylation;ko04723//Retrograde endocannabinoid signaling	K03939;K03939;K03939;K03939;K03939;K03939;K03939;K03939	-	-	-
PH2	ncbi_113809399	acbd6	1.343098383	0.804567953	0.739278808	4.46E-225	1.20E-220	acbd6	PREDICTED: acyl-CoA-binding domain-containing protein 6 [Takifugu rubripes]	-	-	-	-	-	-	-
PH2	ncbi_113811314	Snrpa1	2.214550098	1.494195748	0.567644473	1.22E-224	3.27E-220	Snrpa1	PREDICTED: U2 small nuclear ribonucleoprotein A', partial [Halyomorpha halys]	Genetic Information Processing	Transcription	ko03040//Spliceosome	K11092	-	-	-
PH2	ncbi_113823504	Sf3b6	3.782962559	2.734706922	0.46813027	9.63E-224	2.58E-219	Sf3b6	RNA binding domain containing protein [Coptotermes formosanus]	Genetic Information Processing	Transcription	ko03040//Spliceosome	K12833	-	GO:0097159//organic cyclic compound binding	-
PH2	ncbi_113829084	Mgst3	1.933797967	1.204260132	0.683290015	1.25E-222	3.35E-218	Mgst3	Microsomal glutathione S-transferase, partial [Daphnia magna]	Human Diseases;Human Diseases;Human Diseases;Metabolism;Metabolism;Organismal Systems;Human Diseases;Human Diseases;Human Diseases;Metabolism;Metabolism	Cancers;Cancers;Cardiovascular diseases;Metabolism of other amino acids;Xenobiotics biodegradation and metabolism;Aging;Drug resistance;Cancers;Cancers;Xenobiotics biodegradation and metabolism;Xenobiotics biodegradation and metabolism	ko05200//Pathways in cancer;ko05225//Hepatocellular carcinoma;ko05418//Fluid shear stress and atherosclerosis;ko00480//Glutathione metabolism;ko00983//Drug metabolism - other enzymes;ko04212//Longevity regulating pathway - worm;ko01524//Platinum drug resistance;ko05215//Prostate cancer;ko05204//Chemical carcinogenesis;ko00980//Metabolism of xenobiotics by cytochrome P450;ko00982//Drug metabolism …	K00799;K00799;K00799;K00799;K00799;K00799;K00799;K00799;K00799;K00799;K00799	-	-	-
PH2	ncbi_113829158	Rpb11	1.235609752	0.70262034	0.814405915	1.53E-222	4.10E-218	Rpb11	PREDICTED: DNA-directed RNA polymerase II subunit RPB11-like [Hyalella azteca]	Metabolism;Human Diseases;Metabolism;Human Diseases;Metabolism;Genetic Information Processing	Global and overview maps;Neurodegenerative diseases;Nucleotide metabolism;Infectious diseases;Nucleotide metabolism;Transcription	ko01100//Metabolic pathways;ko05016//Huntington disease;ko00230//Purine metabolism;ko05169//Epstein-Barr virus infection;ko00240//Pyrimidine metabolism;ko03020//RNA polymerase	K03008;K03008;K03008;K03008;K03008;K03008	-	GO:0005515//protein binding;GO:0034062//RNA polymerase activity	GO:0034645//cellular macromolecule biosynthetic process
PH2	ncbi_113826517	EMC6	2.506960518	1.697906191	0.562182524	1.88E-221	5.03E-217	EMC6	PREDICTED: ER membrane protein complex subunit 6-like [Hyalella azteca]	-	-	-	-	GO:0031224//intrinsic component of membrane;GO:0043234//protein complex	-	-
PH2	ncbi_113822730	CG10417	1.633044332	1.01866455	0.680884912	7.81E-221	2.09E-216	CG10417	PREDICTED: probable protein phosphatase 2C 21 [Anoplophora glabripennis]	-	-	-	-	-	GO:0004721//phosphoprotein phosphatase activity;GO:0043169//cation binding	GO:0006464//cellular protein modification process
PH2	ncbi_113814616	ncbi_113814616	3.19353477	2.285283814	0.48278081	4.41E-220	1.18E-215	--	lethal 35Di [Anopheles darlingi]	Metabolism;Organismal Systems;Human Diseases;Human Diseases;Human Diseases;Human Diseases;Metabolism;Organismal Systems	Global and overview maps;Environmental adaptation;Neurodegenerative diseases;Neurodegenerative diseases;Endocrine and metabolic diseases;Neurodegenerative diseases;Energy metabolism;Nervous system	ko01100//Metabolic pathways;ko04714//Thermogenesis;ko05016//Huntington disease;ko05010//Alzheimer disease;ko04932//Non-alcoholic fatty liver disease (NAFLD);ko05012//Parkinson disease;ko00190//Oxidative phosphorylation;ko04723//Retrograde endocannabinoid signaling	K03962;K03962;K03962;K03962;K03962;K03962;K03962;K03962	-	-	-
PH2	ncbi_113821321	PHPT1	2.654525005	1.804858995	0.556567601	7.94E-220	2.13E-215	PHPT1	PREDICTED: 14 kDa phosphohistidine phosphatase-like [Hyalella azteca]	-	-	-	-	-	-	-
PH2	ncbi_113805365	Sdf2	2.558746551	1.688639659	0.59957575	6.89E-219	1.85E-214	Sdf2	PREDICTED: stromal cell-derived factor 2-like [Hyalella azteca]	-	-	-	-	-	GO:0016740//transferase activity	GO:0008152//metabolic process
PH2	ncbi_113830314	gkap1-a	1.994059118	1.33383175	0.580131486	1.68E-216	4.50E-212	gkap1-a	PREDICTED: G kinase-anchoring protein 1-like [Hyalella azteca]	-	-	-	-	-	-	-
PH2	ncbi_113800531	ARCN1	2.263151355	1.504288396	0.589251891	3.45E-216	9.25E-212	ARCN1	PREDICTED: coatomer subunit delta-like isoform X2 [Hyalella azteca]	-	-	-	-	GO:0030117//membrane coat	-	GO:0015031//protein transport;GO:0016192//vesicle-mediated transport;GO:0046907//intracellular transport
PH2	ncbi_113809595	ncbi_113809595	4.046857109	2.932860673	0.464493373	3.83E-216	1.02E-211	--	Up-regulated during skeletal muscle growth protein 5 [Zootermopsis nevadensis]	-	-	-	-	-	-	-
PH2	ncbi_113830144	shv	1.225137628	0.676093246	0.857649686	1.05E-215	2.82E-211	shv	PREDICTED: dnaJ homolog subfamily B member 11 [Stomoxys calcitrans]	Genetic Information Processing	Folding, sorting and degradation	ko04141//Protein processing in endoplasmic reticulum	K09517	-	GO:0005515//protein binding	-
PH2	ncbi_113800275	pabpn1	1.049377488	0.594203284	0.820505263	1.80E-215	4.81E-211	pabpn1	PREDICTED: polyadenylate-binding protein 2 isoform X1 [Anoplophora glabripennis]	Human Diseases;Genetic Information Processing	Infectious diseases;Translation	ko05164//Influenza A;ko03015//mRNA surveillance pathway	K14396;K14396	-	GO:0097159//organic cyclic compound binding	-
PH2	ncbi_113805824	usp106	2.711708709	1.901846593	0.511801332	2.40E-215	6.43E-211	usp106	Putative RNA-binding protein Luc7-like 2 [Zootermopsis nevadensis]	-	-	-	-	-	-	-
PH2	ncbi_113826784	ncbi_113826784	1.278088538	0.75765588	0.754373136	4.60E-215	1.23E-210	--	PREDICTED: ankyrin-3-like isoform X4 [Lingula anatina]	-	-	-	-	-	-	-
PH2	ncbi_113802174	ncbi_113802174	74.38133595	57.77818259	0.364415836	4.37E-214	1.17E-209	--	stylicine 2, partial [Litopenaeus stylirostris]	-	-	-	-	-	-	-
PH2	ncbi_113810208	HINT2	2.81301103	1.92831658	0.544773285	4.87E-213	1.30E-208	HINT2	PREDICTED: uncharacterized HIT-like protein Synpcc7942_1390 [Octopus bimaculoides]	-	-	-	-	-	-	-
PH2	ncbi_113829134	FAM32A	1.937017381	1.255902284	0.62511268	1.53E-212	4.10E-208	FAM32A	PREDICTED: protein FAM32A [Tribolium castaneum]	-	-	-	-	-	-	-
PH2	ncbi_113813489	Gel	1.247319911	0.896411102	0.476599111	3.82E-212	1.02E-207	Gel	gelsolin [Homarus americanus]	Cellular Processes;Human Diseases;Organismal Systems	Cell motility;Cancers;Immune system	ko04810//Regulation of actin cytoskeleton;ko05203//Viral carcinogenesis;ko04666//Fc gamma R-mediated phagocytosis	K05768;K05768;K05768	-	-	-
PH2	ncbi_113823354	CG9849	0.521817637	0.23271079	1.165007604	2.18E-208	5.84E-204	CG9849	PREDICTED: PRADC1-like protein [Hyalella azteca]	-	-	-	-	-	-	-
PH2	ncbi_113806390	bai	1.87616865	1.17087297	0.680204955	6.44E-208	1.72E-203	bai	Transmembrane emp24 domain-containing protein bai [Orchesella cincta]	-	-	-	-	-	-	-
PH2	ncbi_113824578	KIWI	1.276449164	0.757144664	0.753495201	1.53E-207	4.09E-203	KIWI	RNA polymerase II transcriptional coactivator [Daphnia magna]	-	-	-	-	-	-	-
PH2	ncbi_113816012	TOP1	2.270111091	1.574459195	0.527906532	1.19E-205	3.18E-201	TOP1	PREDICTED: DNA topoisomerase I, mitochondrial-like isoform X3 [Hyalella azteca]	-	-	-	-	-	-	-
PH2	ncbi_113818542	Roc1a	4.419920064	3.313375923	0.415718383	5.88E-203	1.58E-198	Roc1a	PREDICTED: RING-box protein 1A [Hyalella azteca]	Human Diseases;Genetic Information Processing;Genetic Information Processing;Cellular Processes;Environmental Information Processing;Cellular Processes;Environmental Information Processing;Environmental Information Processing;Genetic Information Processing;Human Diseases;Environmental Information Processing;Organismal Systems	Cancers;Folding, sorting and degradation;Folding, sorting and degradation;Cell growth and death;Signal transduction;Cell growth and death;Signal transduction;Signal transduction;Replication and repair;Cancers;Signal transduction;Environmental adaptation	ko05200//Pathways in cancer;ko04141//Protein processing in endoplasmic reticulum;ko04120//Ubiquitin mediated proteolysis;ko04110//Cell cycle;ko04310//Wnt signaling pathway;ko04114//Oocyte meiosis;ko04066//HIF-1 signaling pathway;ko04350//TGF-beta signaling pathway;ko03420//Nucleotide excision repair;ko05211//Renal cell carcinoma;ko04341//Hedgehog signaling pathway - fly;ko04710//Circadian rhythm	K03868;K03868;K03868;K03868;K03868;K03868;K03868;K03868;K03868;K03868;K03868;K03868	-	GO:0043169//cation binding	-
PH2	ncbi_113803921	snf	2.307552591	1.600542433	0.527802602	6.69E-203	1.79E-198	snf	PREDICTED: U1 small nuclear ribonucleoprotein A [Ceratina calcarata]	-	-	-	-	-	GO:0003676//nucleic acid binding	-
PH2	ncbi_113816302	timm23	2.336052452	1.618897697	0.529060847	1.87E-202	5.01E-198	timm23	PREDICTED: mitochondrial import inner membrane translocase subunit Tim23-like [Hyalella azteca]	Organismal Systems	Aging	ko04212//Longevity regulating pathway - worm	K17794	-	-	-
PH2	ncbi_113829996	bud31	1.607143134	1.030364203	0.641344046	1.05E-201	2.80E-197	bud31	BUD31 homolog [Lepeophtheirus salmonis]	Genetic Information Processing	Transcription	ko03040//Spliceosome	K12873	GO:0043231//intracellular membrane-bounded organelle	GO:0003676//nucleic acid binding;GO:0032550//purine ribonucleoside binding;GO:0042623//ATPase activity, coupled	-
PH2	ncbi_113803433	NDUFB3	4.686000245	3.552293996	0.399606043	1.62E-201	4.33E-197	NDUFB3	NADH dehydrogenase [Palaemon varians]	Metabolism;Organismal Systems;Human Diseases;Human Diseases;Human Diseases;Human Diseases;Metabolism;Organismal Systems	Global and overview maps;Environmental adaptation;Neurodegenerative diseases;Neurodegenerative diseases;Endocrine and metabolic diseases;Neurodegenerative diseases;Energy metabolism;Nervous system	ko01100//Metabolic pathways;ko04714//Thermogenesis;ko05016//Huntington disease;ko05010//Alzheimer disease;ko04932//Non-alcoholic fatty liver disease (NAFLD);ko05012//Parkinson disease;ko00190//Oxidative phosphorylation;ko04723//Retrograde endocannabinoid signaling	K03959;K03959;K03959;K03959;K03959;K03959;K03959;K03959	-	-	-
PH2	ncbi_113815625	tsu	2.521692745	1.764943738	0.514770307	2.39E-201	6.40E-197	tsu	tsunagi/Y14 [Macrobrachium nipponense]	Genetic Information Processing;Genetic Information Processing;Genetic Information Processing	Translation;Transcription;Translation	ko03013//RNA transport;ko03040//Spliceosome;ko03015//mRNA surveillance pathway	K12876;K12876;K12876	GO:0005634//nucleus	GO:0003676//nucleic acid binding	GO:0006396//RNA processing;GO:0006810//transport
PH2	ncbi_113826178	REXO2	1.886174176	1.262529589	0.579145706	1.65E-200	4.42E-196	REXO2	PREDICTED: oligoribonuclease, mitochondrial-like [Hyalella azteca]	Genetic Information Processing	Translation	ko03008//Ribosome biogenesis in eukaryotes	K13288	GO:0043231//intracellular membrane-bounded organelle	GO:0004527//exonuclease activity;GO:0097159//organic cyclic compound binding	GO:0006139//nucleobase-containing compound metabolic process
PH2	ncbi_113812679	emc3	3.755128878	2.822296689	0.411992766	5.76E-199	1.54E-194	emc3	PREDICTED: ER membrane protein complex subunit 3-like [Limulus polyphemus]	-	-	-	-	-	-	-
PH2	ncbi_113806700	CG9705	1.452266583	0.872477508	0.735116459	8.30E-197	2.22E-192	CG9705	PREDICTED: cold shock domain-containing protein CG9705-like [Hyalella azteca]	-	-	-	-	-	GO:0043169//cation binding	-
PH2	ncbi_113824734	ncbi_113824734	3.071136748	2.19073709	0.487356395	5.53E-196	1.48E-191	--	PREDICTED: uncharacterized protein C20orf24 homolog [Aethina tumida]	-	-	-	-	-	-	-
PH2	ncbi_113802736	CNPY2	2.12173089	1.303899884	0.702408582	3.70E-195	9.90E-191	CNPY2	PREDICTED: protein canopy homolog 2-like [Hyalella azteca]	-	-	-	-	-	-	-
PH2	ncbi_113806326	ncbi_113806326	1.757646634	1.11368465	0.658304275	1.84E-194	4.93E-190	--	-	-	-	-	-	-	-	-
PH2	ncbi_113816769	ncbi_113816769	3.785313767	2.799106754	0.435446381	3.11E-194	8.33E-190	--	PREDICTED: NADH dehydrogenase [ubiquinone] iron-sulfur protein 5 [Drosophila elegans]	-	-	-	-	-	-	-
PH2	ncbi_113820394	ncbi_113820394	1.197256789	0.669870194	0.837779152	4.95E-194	1.33E-189	--	-	-	-	-	-	-	-	-
PH2	ncbi_113812898	U2af38	1.177496403	0.707767661	0.734374904	7.06E-194	1.89E-189	U2af38	PREDICTED: splicing factor U2af 38 kDa subunit [Anoplophora glabripennis]	Genetic Information Processing;Human Diseases	Transcription;Infectious diseases	ko03040//Spliceosome;ko05131//Shigellosis	K12836;K12836	GO:0043231//intracellular membrane-bounded organelle	GO:0003676//nucleic acid binding;GO:0043169//cation binding	-
PH2	ncbi_113802708	ncbi_113802708	3.412708804	2.479138356	0.461078532	2.40E-193	6.44E-189	--	PREDICTED: SAP domain-containing ribonucleoprotein [Microplitis demolitor]	-	-	-	-	-	-	-
PH2	ncbi_113812187	ncbi_113812187	1.334180212	0.830636852	0.683663765	1.83E-192	4.89E-188	--	-	-	-	-	-	-	-	-
PH2	ncbi_113801053	PRKCSH	0.693094782	0.356772842	0.958046857	2.08E-192	5.56E-188	PRKCSH	Glucosidase 2 subunit beta [Daphnia magna]	Genetic Information Processing	Folding, sorting and degradation	ko04141//Protein processing in endoplasmic reticulum	K08288	-	-	-
PH2	ncbi_113822768	Clpp	1.322989867	0.83852205	0.657881385	4.19E-192	1.12E-187	Clpp	PREDICTED: ATP-dependent Clp protease proteolytic subunit-like [Hyalella azteca]	Organismal Systems	Aging	ko04212//Longevity regulating pathway - worm	K01358	-	GO:0070011//peptidase activity, acting on L-amino acid peptides	GO:0019538//protein metabolic process
PH2	ncbi_113806630	MBD4	2.154058866	1.470136151	0.551107905	8.66E-192	2.32E-187	MBD4	PREDICTED: methyl-CpG-binding domain protein 4-like [Hyalella azteca]	Genetic Information Processing	Replication and repair	ko03410//Base excision repair	K10801	-	-	GO:0006281//DNA repair
PH2	ncbi_113812324	ncbi_113812324	1.218958694	0.71517581	0.769279394	3.22E-191	8.61E-187	--	PREDICTED: rac-like GTP-binding protein ARAC7 [Crassostrea gigas]	-	-	-	-	-	-	-
PH2	ncbi_113811304	PSMA5	4.97194023	3.829373551	0.376700553	4.94E-191	1.32E-186	PSMA5	PREDICTED: proteasome subunit alpha type-5-like [Hyalella azteca]	Genetic Information Processing	Folding, sorting and degradation	ko03050//Proteasome	K02729	-	-	-
PH2	ncbi_113825837	ncbi_113825837	1.034786241	0.602438841	0.780446083	9.88E-191	2.65E-186	--	-	-	-	-	-	-	-	-
PH2	ncbi_113802926	TARDBP	1.329890388	0.856729989	0.634394846	2.26E-188	6.06E-184	TARDBP	TAR DNA-binding protein 43 [Zootermopsis nevadensis]	-	-	-	-	-	-	-
PH2	ncbi_113814902	Vbp1	6.25818974	4.839318884	0.370941392	1.08E-187	2.88E-183	Vbp1	PREDICTED: prefoldin subunit 3-like [Hyalella azteca]	-	-	-	-	GO:0043234//protein complex	-	-
PH2	ncbi_113827272	isoc2	1.367373007	0.851164215	0.683897447	8.06E-187	2.16E-182	isoc2	PREDICTED: isochorismatase domain-containing protein 2, mitochondrial-like [Limulus polyphemus]	-	-	-	-	-	GO:0016787//hydrolase activity	-
PH2	ncbi_113816342	Tspan31	1.932803783	1.236351168	0.644606605	7.09E-186	1.90E-181	Tspan31	PREDICTED: tetraspanin-31-like isoform X1 [Hyalella azteca]	-	-	-	-	-	-	-
PH2	ncbi_113816375	ncbi_113816375	1.507816482	0.998602593	0.594478289	6.13E-185	1.64E-180	--	-	-	-	-	-	-	-	-
PH2	ncbi_113829565	DHCR24	1.181023964	0.693603964	0.767854189	9.78E-185	2.62E-180	DHCR24	Delta(24)-sterol reductase [Daphnia magna]	Metabolism;Metabolism	Global and overview maps;Lipid metabolism	ko01100//Metabolic pathways;ko00100//Steroid biosynthesis	K09828;K09828	-	GO:0016614//oxidoreductase activity, acting on CH-OH group of donors	-
PH2	ncbi_113820819	Hnrnpl	1.80313103	1.205199829	0.581231865	3.86E-184	1.03E-179	Hnrnpl	PREDICTED: heterogeneous nuclear ribonucleoprotein L-like isoform X2 [Hyalella azteca]	-	-	-	-	-	-	-
PH2	ncbi_113808371	Ube2n	2.55660191	1.784229519	0.518926323	4.11E-184	1.10E-179	Ube2n	PREDICTED: ubiquitin-conjugating enzyme E2 N [Hyalella azteca]	Genetic Information Processing;Organismal Systems	Folding, sorting and degradation;Immune system	ko04120//Ubiquitin mediated proteolysis;ko04624//Toll and Imd signaling pathway	K10580;K10580	-	GO:0003824//catalytic activity	-
PH2	ncbi_113819217	NUDT9	0.701115046	0.376437362	0.897241373	1.71E-183	4.57E-179	NUDT9	PREDICTED: ADP-ribose pyrophosphatase, mitochondrial-like [Lingula anatina]	Metabolism	Nucleotide metabolism	ko00230//Purine metabolism	K13988	-	-	-
PH2	ncbi_113808915	PSMB2	6.39845651	4.994847874	0.357283189	2.92E-183	7.83E-179	PSMB2	PREDICTED: proteasome subunit beta type-2-like [Hyalella azteca]	Genetic Information Processing	Folding, sorting and degradation	ko03050//Proteasome	K02734	GO:0044424//intracellular part	GO:0004175//endopeptidase activity	GO:0006508//proteolysis
PH2	ncbi_113820410	MDH1	1.434721037	0.924577445	0.633904176	7.64E-183	2.05E-178	MDH1	PREDICTED: malate dehydrogenase, cytoplasmic-like [Hyalella azteca]	Metabolism;Metabolism;Metabolism;Metabolism;Metabolism;Metabolism;Organismal Systems	Global and overview maps;Global and overview maps;Carbohydrate metabolism;Amino acid metabolism;Carbohydrate metabolism;Carbohydrate metabolism;Excretory system	ko01100//Metabolic pathways;ko01200//Carbon metabolism;ko00020//Citrate cycle (TCA cycle);ko00270//Cysteine and methionine metabolism;ko00620//Pyruvate metabolism;ko00630//Glyoxylate and dicarboxylate metabolism;ko04964//Proximal tubule bicarbonate reclamation	K00025;K00025;K00025;K00025;K00025;K00025;K00025	GO:0005815//microtubule organizing center;GO:0031988//membrane-bounded vesicle;GO:0043231//intracellular membrane-bounded organelle;GO:0044421//extracellular region part;GO:0044444//cytoplasmic part	GO:0000166//nucleotide binding;GO:0016615//malate dehydrogenase activity;GO:0016616//oxidoreductase activity, acting on the CH-OH group of donors, NAD or NADP as acceptor	GO:0006006//glucose metabolic process;GO:0006101//citrate metabolic process;GO:0010506//regulation of autophagy;GO:0019674//NAD metabolic process;GO:0043648//dicarboxylic acid metabolic process;GO:0051704//multi-organism process
PH2	ncbi_113829132	SEC13	2.545058174	1.765821264	0.527359312	1.77E-182	4.73E-178	SEC13	SEC13 protein [Daphnia magna]	Genetic Information Processing;Genetic Information Processing;Environmental Information Processing	Folding, sorting and degradation;Translation;Signal transduction	ko04141//Protein processing in endoplasmic reticulum;ko03013//RNA transport;ko04150//mTOR signaling pathway	K14004;K14004;K14004	GO:0031988//membrane-bounded vesicle;GO:0044432//endoplasmic reticulum part	-	GO:0003407//neural retina development;GO:0006996//organelle organization;GO:0015031//protein transport;GO:0030198//extracellular matrix organization;GO:0042461//photoreceptor cell development
PH2	ncbi_113806230	PSMA3	4.208554488	3.189563894	0.399965617	3.82E-182	1.02E-177	PSMA3	proteasome alpha 3 [Penaeus monodon]	Genetic Information Processing	Folding, sorting and degradation	ko03050//Proteasome	K02727	GO:0043231//intracellular membrane-bounded organelle;GO:0043234//protein complex	GO:0004175//endopeptidase activity	GO:0019941//modification-dependent protein catabolic process
PH2	ncbi_113827590	tric-1B.1	1.065513386	0.609420344	0.80603915	1.70E-181	4.55E-177	tric-1B.1	PREDICTED: trimeric intracellular cation channel type B-like [Hyalella azteca]	-	-	-	-	-	-	-
PH2	ncbi_113815109	smpd5	0.518043731	0.2422067	1.096835117	3.23E-181	8.64E-177	smpd5	Sphingomyelin phosphodiesterase 3 [Daphnia magna]	Metabolism;Metabolism	Global and overview maps;Nucleotide metabolism	ko01100//Metabolic pathways;ko00240//Pyrimidine metabolism	K00254;K00254	-	-	-
PH2	ncbi_113813284	ncbi_113813284	1.46945447	0.897418563	0.711427727	1.24E-180	3.33E-176	--	-	-	-	-	-	-	-	-
PH2	ncbi_113818096	HNRNP	4.548800001	3.322730129	0.453116882	1.63E-179	4.38E-175	HNRNP	PREDICTED: heterogeneous nuclear ribonucleoprotein A1, A2/B1 homolog, partial [Hyalella azteca]	Genetic Information Processing	Transcription	ko03040//Spliceosome	K12741	-	-	-
PH2	ncbi_113817901	SLC6A9	1.171580344	0.712786922	0.71691312	1.18E-178	3.17E-174	SLC6A9	PREDICTED: sodium- and chloride-dependent glycine transporter 1-like [Hyalella azteca]	-	-	-	-	-	-	GO:0006810//transport
PH2	ncbi_113800799	ncbi_113800799	1.562843052	0.958694103	0.705030439	1.14E-177	3.06E-173	--	-	-	-	-	-	-	-	-
PH2	ncbi_113815758	Tomm22	1.372613283	0.900137125	0.60870852	8.89E-176	2.38E-171	Tomm22	PREDICTED: mitochondrial import receptor subunit TOM22 homolog isoform X2 [Hyalella azteca]	-	-	-	-	-	-	-
PH2	ncbi_113808501	emc10	1.225119642	0.765154424	0.679099799	1.72E-175	4.61E-171	emc10	PREDICTED: ER membrane protein complex subunit 10-like [Hyalella azteca]	-	-	-	-	-	-	-
PH2	ncbi_113820484	gpat3	0.56442773	0.282155524	1.000298273	4.88E-175	1.31E-170	gpat3	PREDICTED: glycerol-3-phosphate acyltransferase 3-like [Rhagoletis zephyria]	Metabolism;Metabolism;Metabolism	Global and overview maps;Lipid metabolism;Lipid metabolism	ko01100//Metabolic pathways;ko00564//Glycerophospholipid metabolism;ko00561//Glycerolipid metabolism	K13506;K13506;K13506	-	-	-
PH2	ncbi_113817752	Set	2.227215091	1.579184294	0.496061345	8.56E-175	2.29E-170	Set	Protein SET [Zootermopsis nevadensis]	-	-	-	-	-	-	GO:0034728//nucleosome organization
PH2	ncbi_113828829	cam	6.857755189	5.280460011	0.377072787	2.16E-174	5.80E-170	cam	calmodulin B [Litopenaeus vannamei]	Human Diseases;Environmental Information Processing;Organismal Systems;Organismal Systems;Human Diseases;Human Diseases;Human Diseases;Environmental Information Processing;Organismal Systems;Environmental Information Processing;Environmental Information Processing;Organismal Systems;Organismal Systems;Human Diseases;Environmental Information Processing;Cellular Processes;Human Diseases;Cellular P…	Cancers;Signal transduction;Sensory system;Endocrine system;Cardiovascular diseases;Neurodegenerative diseases;Substance dependence;Signal transduction;Circulatory system;Signal transduction;Signal transduction;Digestive system;Endocrine system;Infectious diseases;Signal transduction;Cell growth and death;Infectious diseases;Cell growth and death;Circulatory system;Nervous system;Signal transduct…	ko05200//Pathways in cancer;ko04015//Rap1 signaling pathway;ko04745//Phototransduction - fly;ko04921//Oxytocin signaling pathway;ko05418//Fluid shear stress and atherosclerosis;ko05010//Alzheimer disease;ko05034//Alcoholism;ko04022//cGMP - PKG signaling pathway;ko04261//Adrenergic signaling in cardiomyocytes;ko04024//cAMP signaling pathway;ko04014//Ras signaling pathway;ko04971//Gastric acid secr…	K02183;K02183;K02183;K02183;K02183;K02183;K02183;K02183;K02183;K02183;K02183;K02183;K02183;K02183;K02183;K02183;K02183;K02183;K02183;K02183;K02183;K02183;K02183;K02183;K02183;K02183;K02183;K02183;K02183;K02183;K02183;K02183;K02183;K02183;K02183;K02183;K02183;K02183;K02183;K02183	-	-	-
PH2	ncbi_113827409	rsp-7	0.903857715	0.516850152	0.806349616	2.32E-174	6.21E-170	rsp-7	PREDICTED: probable splicing factor, arginine/serine-rich 7 [Hyalella azteca]	-	-	-	-	-	-	-
PH2	ncbi_113807546	ECI2	1.300694273	0.820823451	0.664138044	4.60E-174	1.23E-169	ECI2	PREDICTED: enoyl-CoA delta isomerase 2, mitochondrial [Clupea harengus]	Cellular Processes;Metabolism	Transport and catabolism;Lipid metabolism	ko04146//Peroxisome;ko00071//Fatty acid degradation	K13239;K13239	-	GO:0003824//catalytic activity	-
PH2	ncbi_113828834	ncbi_113828834	1.077978813	0.678444806	0.668025466	7.25E-173	1.94E-168	--	-	-	-	-	-	-	-	-
PH2	ncbi_113824065	SmB	4.682969872	3.60372167	0.377936166	2.04E-172	5.46E-168	SmB	PREDICTED: small nuclear ribonucleoprotein-associated protein B-like [Parasteatoda tepidariorum]	Genetic Information Processing;Human Diseases	Transcription;Immune diseases	ko03040//Spliceosome;ko05322//Systemic lupus erythematosus	K11086;K11086	GO:0005681//spliceosomal complex;GO:0005737//cytoplasm;GO:0016604//nuclear body	-	GO:0000377//RNA splicing, via transesterification reactions with bulged adenosine as nucleophile;GO:0003006//developmental process involved in reproduction;GO:0007051//spindle organization;GO:0044702//single organism reproductive process
PH2	ncbi_113811036	Tango1	2.868904227	2.119804899	0.436568318	3.89E-172	1.04E-167	Tango1	PREDICTED: transport and Golgi organization protein 1-like isoform X5 [Hyalella azteca]	-	-	-	-	-	-	-
PH2	ncbi_113805605	ier3ip1	0.828273825	0.465040234	0.832752259	9.74E-172	2.61E-167	ier3ip1	PREDICTED: immediate early response 3-interacting protein 1-like [Hyalella azteca]	-	-	-	-	-	-	-
PH2	ncbi_113805239	paxt-1	0.707586607	0.391084162	0.855427631	3.26E-169	8.74E-165	paxt-1	PREDICTED: NF-kappa-B-repressing factor [Diachasma alloeum]	-	-	-	-	-	-	-
PH2	ncbi_113801883	ncbi_113801883	0.840937812	0.453318553	0.89147391	3.89E-169	1.04E-164	--	-	-	-	-	-	-	-	-
PH2	ncbi_113827288	bcl7a	1.09311321	0.668191596	0.710109081	2.51E-168	6.72E-164	bcl7a	PREDICTED: B-cell CLL/lymphoma 7 protein family member A-like [Hyalella azteca]	-	-	-	-	-	-	-
PH2	ncbi_113814389	Catsup	2.108404226	1.480505554	0.510061587	5.36E-168	1.43E-163	Catsup	PREDICTED: protein catecholamines up-like [Hyalella azteca]	-	-	-	-	GO:0016020//membrane;GO:0043231//intracellular membrane-bounded organelle	GO:0046915//transition metal ion transmembrane transporter activity	GO:0006829//zinc II ion transport;GO:0072507//divalent inorganic cation homeostasis
PH2	ncbi_113829206	ncbi_113829206	1.210359381	0.77669061	0.640023549	1.61E-167	4.32E-163	--	PREDICTED: ribonuclease H2 subunit C-like [Hyalella azteca]	Genetic Information Processing	Replication and repair	ko03030//DNA replication	K10745	-	-	-
PH2	ncbi_113802357	Rac2	0.997200136	0.577225156	0.788748906	1.58E-166	4.24E-162	Rac2	PREDICTED: rho-related GTP-binding protein RhoQ isoform X1 [Pseudopodoces humilis]	Human Diseases;Cellular Processes;Human Diseases;Cellular Processes;Environmental Information Processing;Cellular Processes;Cellular Processes;Environmental Information Processing;Human Diseases;Environmental Information Processing;Cellular Processes;Human Diseases;Human Diseases;Human Diseases;Human Diseases;Environmental Information Processing;Organismal Systems;Environmental Information Proces…	Cancers;Cellular community - eukaryotes;Cancers;Transport and catabolism;Signal transduction;Cell motility;Cellular community - eukaryotes;Signal transduction;Cancers;Signal transduction;Cellular community - eukaryotes;Cardiovascular diseases;Infectious diseases;Infectious diseases;Infectious diseases;Signal transduction;Digestive system;Signal transduction;Cancers;Cardiovascular diseases;Signal …	ko05200//Pathways in cancer;ko04510//Focal adhesion;ko05205//Proteoglycans in cancer;ko04145//Phagosome;ko04151//PI3K-Akt signaling pathway;ko04810//Regulation of actin cytoskeleton;ko04530//Tight junction;ko04015//Rap1 signaling pathway;ko05231//Choline metabolism in cancer;ko04013//MAPK signaling pathway - fly;ko04520//Adherens junction;ko05418//Fluid shear stress and atherosclerosis;ko05131//S…	K04392;K04392;K04392;K04392;K04392;K04392;K04392;K04392;K04392;K04392;K04392;K04392;K04392;K04392;K04392;K04392;K04392;K04392;K04392;K04392;K04392;K04392;K04392;K04392;K04392;K04392;K04392;K04392;K04392;K04392;K04392;K04392;K04392;K04392;K04392;K04392;K04392;K04392;K04392;K04392;K04392;K04392;K04392	-	-	-
PH2	ncbi_113830605	ND-ACP	4.334261729	3.376445723	0.360280909	7.57E-166	2.03E-161	ND-ACP	mitochondrial acyl carrier protein [Artemia franciscana]	Metabolism;Organismal Systems;Human Diseases;Human Diseases;Human Diseases;Human Diseases;Metabolism;Organismal Systems	Global and overview maps;Environmental adaptation;Neurodegenerative diseases;Neurodegenerative diseases;Endocrine and metabolic diseases;Neurodegenerative diseases;Energy metabolism;Nervous system	ko01100//Metabolic pathways;ko04714//Thermogenesis;ko05016//Huntington disease;ko05010//Alzheimer disease;ko04932//Non-alcoholic fatty liver disease (NAFLD);ko05012//Parkinson disease;ko00190//Oxidative phosphorylation;ko04723//Retrograde endocannabinoid signaling	K03955;K03955;K03955;K03955;K03955;K03955;K03955;K03955	-	-	-
PH2	ncbi_113802818	CCT1	2.955211492	2.17168774	0.444444704	9.89E-166	2.65E-161	CCT1	T-complex protein 1 subunit alpha [Scylla paramamosain]	-	-	-	-	GO:0044424//intracellular part	GO:0005515//protein binding;GO:0032550//purine ribonucleoside binding	GO:0044267//cellular protein metabolic process
PH2	ncbi_113819878	CERS6	0.688011483	0.383543423	0.84304272	1.10E-165	2.95E-161	CERS6	PREDICTED: ceramide synthase 6-like [Hyalella azteca]	Metabolism;Environmental Information Processing;Metabolism	Global and overview maps;Signal transduction;Lipid metabolism	ko01100//Metabolic pathways;ko04071//Sphingolipid signaling pathway;ko00600//Sphingolipid metabolism	K04710;K04710;K04710	-	-	-
PH2	ncbi_113826042	PHB2	2.115263995	1.506916961	0.489237811	1.59E-165	4.25E-161	PHB2	prohibitin 2 [Penaeus monodon]	-	-	-	-	-	-	-
PH2	ncbi_113809927	PPM1B	2.711798082	2.011961357	0.430647165	2.58E-164	6.91E-160	PPM1B	protein phosphatase 1B [Marsupenaeus japonicus]	Environmental Information Processing;Environmental Information Processing	Signal transduction;Signal transduction	ko04013//MAPK signaling pathway - fly;ko04010//MAPK signaling pathway	K04461;K04461	-	-	-
PH2	ncbi_113806503	Pex3	1.314214186	0.843061548	0.640490555	3.35E-164	8.97E-160	Pex3	Peroxisomal biogenesis factor 3 [Zootermopsis nevadensis]	Cellular Processes	Transport and catabolism	ko04146//Peroxisome	K13336	GO:0043231//intracellular membrane-bounded organelle	-	-
PH2	ncbi_113828823	GK14514	1.890328442	1.263641341	0.581049881	4.55E-164	1.22E-159	GK14514	PREDICTED: DDRGK domain-containing protein 1 [Drosophila ficusphila]	-	-	-	-	-	-	-
PH2	ncbi_113814918	GCR1	2.421614858	1.770880377	0.451502671	4.64E-164	1.24E-159	GCR1	serotonin receptor [Metapenaeus ensis]	-	-	-	-	-	GO:0004871//signal transducer activity	GO:0009987//cellular process
PH2	ncbi_113823180	ncbi_113823180	2.644022886	1.974692415	0.421106713	1.91E-162	5.10E-158	--	-	-	-	-	-	-	-	-
PH2	ncbi_113817432	mlec	0.440170747	0.209039211	1.074289684	8.45E-162	2.26E-157	mlec	Malectin-B [Zootermopsis nevadensis]	-	-	-	-	-	-	-
PH2	ncbi_113805527	lrrfip2	2.830118822	2.138551923	0.40422839	2.85E-160	7.64E-156	lrrfip2	leucine-rich repeat flightless-I-interacting protein 2D [Litopenaeus vannamei]	-	-	-	-	-	-	-
PH2	ncbi_113801962	NUDC	1.298055626	0.876340959	0.566788013	3.59E-160	9.62E-156	NUDC	PREDICTED: nuclear migration protein nudC [Macaca fascicularis]	-	-	-	-	-	-	-
PH2	ncbi_113806872	AAEL008004	2.000950352	1.382352652	0.533559662	5.22E-160	1.40E-155	AAEL008004	elongation of very long chain fatty acids-like protein [Marsupenaeus japonicus]	-	-	-	-	-	-	-
PH2	ncbi_113829162	PDCL3	1.928233606	1.321487375	0.545117203	7.03E-160	1.88E-155	PDCL3	PREDICTED: viral IAP-associated factor homolog [Hyalella azteca]	-	-	-	-	-	-	-
PH2	ncbi_113803092	CCT6	4.441529219	3.450330565	0.364321894	4.63E-159	1.24E-154	CCT6	PREDICTED: T-complex protein 1 subunit zeta-like [Hyalella azteca]	-	-	-	-	GO:0044424//intracellular part	GO:0005515//protein binding;GO:0032550//purine ribonucleoside binding	GO:0044267//cellular protein metabolic process
PH2	ncbi_113803588	Ddx46	0.93779773	0.569605654	0.719313319	2.73E-157	7.30E-153	Ddx46	PREDICTED: probable ATP-dependent RNA helicase DDX46 isoform X3 [Hyalella azteca]	Genetic Information Processing	Transcription	ko03040//Spliceosome	K12811	-	GO:0017111//nucleoside-triphosphatase activity;GO:0032550//purine ribonucleoside binding	-
PH2	ncbi_113807093	ncbi_113807093	2.308861343	1.722337697	0.422813498	1.40E-156	3.76E-152	--	PREDICTED: serine-rich adhesin for platelets-like [Hyalella azteca]	-	-	-	-	-	-	-
PH2	ncbi_113817572	DHRS11	0.860764152	0.523370986	0.717784049	1.62E-156	4.33E-152	DHRS11	PREDICTED: dehydrogenase/reductase SDR family member 11-like isoform X2 [Lingula anatina]	-	-	-	-	-	-	-
PH2	ncbi_113806734	mrpl20	1.61391839	1.141259655	0.499940563	1.53E-155	4.10E-151	mrpl20	PREDICTED: 39S ribosomal protein L20, mitochondrial [Orussus abietinus]	Genetic Information Processing	Translation	ko03010//Ribosome	K02887	-	-	-
PH2	ncbi_113827838	Pka-C1	0.686542624	0.414387704	0.728368097	1.84E-155	4.93E-151	Pka-C1	Aurora kinase B [Daphnia magna]	Human Diseases;Organismal Systems;Human Diseases;Human Diseases;Cellular Processes;Organismal Systems;Human Diseases;Organismal Systems;Human Diseases;Organismal Systems;Environmental Information Processing;Organismal Systems;Human Diseases;Organismal Systems;Environmental Information Processing;Human Diseases;Environmental Information Processing;Human Diseases;Cellular Processes;Human Diseases;H…	Cancers;Environmental adaptation;Infectious diseases;Cancers;Cellular community - eukaryotes;Endocrine system;Cardiovascular diseases;Immune system;Infectious diseases;Endocrine system;Signal transduction;Aging;Substance dependence;Circulatory system;Signal transduction;Cancers;Signal transduction;Infectious diseases;Transport and catabolism;Infectious diseases;Endocrine and metabolic diseases;Di…	ko05200//Pathways in cancer;ko04714//Thermogenesis;ko05165//Human papillomavirus infection;ko05205//Proteoglycans in cancer;ko04530//Tight junction;ko04919//Thyroid hormone signaling pathway;ko05414//Dilated cardiomyopathy (DCM);ko04611//Platelet activation;ko05166//HTLV-I infection;ko04921//Oxytocin signaling pathway;ko04010//MAPK signaling pathway;ko04213//Longevity regulating pathway - multipl…	K04345;K04345;K04345;K04345;K04345;K04345;K04345;K04345;K04345;K04345;K04345;K04345;K04345;K04345;K04345;K04345;K04345;K04345;K04345;K04345;K04345;K04345;K04345;K04345;K04345;K04345;K04345;K04345;K04345;K04345;K04345;K04345;K04345;K04345;K04345;K04345;K04345;K04345;K04345;K04345;K04345;K04345;K04345;K04345;K04345;K04345;K04345;K04345;K04345;K04345;K04345;K04345;K04345;K04345;K04345;K04345;K04345;…	-	GO:0004672//protein kinase activity;GO:0032550//purine ribonucleoside binding	GO:0006464//cellular protein modification process;GO:0006796//phosphate-containing compound metabolic process
PH2	ncbi_113826162	Lpcat3	0.579581604	0.310952852	0.898315956	4.33E-155	1.16E-150	Lpcat3	Lysophospholipid acyltransferase 5 [Zootermopsis nevadensis]	Metabolism;Cellular Processes	Lipid metabolism;Cell growth and death	ko00564//Glycerophospholipid metabolism;ko04216//Ferroptosis	K13515;K13515	-	-	-
PH2	ncbi_113828659	snu13	1.659671631	1.057228257	0.65061094	6.05E-154	1.62E-149	snu13	PREDICTED: NHP2-like protein 1 [Lingula anatina]	Genetic Information Processing;Genetic Information Processing	Transcription;Translation	ko03040//Spliceosome;ko03008//Ribosome biogenesis in eukaryotes	K12845;K12845	GO:0030529//intracellular ribonucleoprotein complex;GO:0043231//intracellular membrane-bounded organelle;GO:0043232//intracellular non-membrane-bounded organelle	GO:0003676//nucleic acid binding;GO:0046914//transition metal ion binding	GO:0006396//RNA processing;GO:0022613//ribonucleoprotein complex biogenesis
PH2	ncbi_113808967	NDUFA6	2.065570967	1.506096601	0.455726321	1.17E-153	3.12E-149	NDUFA6	AAEL000138-PA [Aedes aegypti]	Metabolism;Organismal Systems;Human Diseases;Human Diseases;Human Diseases;Human Diseases;Metabolism;Organismal Systems	Global and overview maps;Environmental adaptation;Neurodegenerative diseases;Neurodegenerative diseases;Endocrine and metabolic diseases;Neurodegenerative diseases;Energy metabolism;Nervous system	ko01100//Metabolic pathways;ko04714//Thermogenesis;ko05016//Huntington disease;ko05010//Alzheimer disease;ko04932//Non-alcoholic fatty liver disease (NAFLD);ko05012//Parkinson disease;ko00190//Oxidative phosphorylation;ko04723//Retrograde endocannabinoid signaling	K03950;K03950;K03950;K03950;K03950;K03950;K03950;K03950	-	-	-
PH2	ncbi_113823575	DCTN5	1.637496099	1.137324836	0.525847102	2.17E-153	5.80E-149	DCTN5	dynactin subunit 5 [Penaeus monodon]	Organismal Systems	Excretory system	ko04962//Vasopressin-regulated water reabsorption	K10427	-	-	-
PH2	ncbi_113812478	CCDC58	1.999322583	1.421928985	0.491661849	9.42E-153	2.52E-148	CCDC58	PREDICTED: coiled-coil domain-containing protein 58 [Nasonia vitripennis]	-	-	-	-	-	-	-
PH2	ncbi_113824082	LMAN1	0.60650657	0.316900288	0.936494305	2.55E-152	6.84E-148	LMAN1	PREDICTED: protein ERGIC-53-like isoform X1 [Hyalella azteca]	Genetic Information Processing	Folding, sorting and degradation	ko04141//Protein processing in endoplasmic reticulum	K10080	-	-	-
PH2	ncbi_113813421	PPT1	0.951667165	0.574868904	0.7272241	3.06E-152	8.19E-148	PPT1	Palmitoyl-protein thioesterase 1 [Trichinella sp. T6]	Metabolism;Cellular Processes;Metabolism;Metabolism	Global and overview maps;Transport and catabolism;Global and overview maps;Lipid metabolism	ko01100//Metabolic pathways;ko04142//Lysosome;ko01212//Fatty acid metabolism;ko00062//Fatty acid elongation	K01074;K01074;K01074;K01074	-	GO:0005488//binding	-
PH2	ncbi_113821126	CLIP1	0.50698467	0.272304179	0.896723003	4.50E-152	1.21E-147	CLIP1	PREDICTED: CAP-Gly domain-containing linker protein 1 isoform X4 [Anoplophora glabripennis]	Environmental Information Processing	Signal transduction	ko04150//mTOR signaling pathway	K10421	-	-	-
PH2	ncbi_113817562	Tmem214	0.686072841	0.377619334	0.861429123	1.38E-151	3.68E-147	Tmem214	PREDICTED: transmembrane protein 214-B-like [Lingula anatina]	-	-	-	-	-	-	-
PH2	ncbi_113829836	Ndufa7	2.278974201	1.667111694	0.451033826	1.78E-151	4.75E-147	Ndufa7	NADH dehydrogenase [ubiquinone] 1 alpha subcomplex subunit 7 [Zootermopsis nevadensis]	Metabolism;Organismal Systems;Human Diseases;Human Diseases;Human Diseases;Human Diseases;Metabolism;Organismal Systems	Global and overview maps;Environmental adaptation;Neurodegenerative diseases;Neurodegenerative diseases;Endocrine and metabolic diseases;Neurodegenerative diseases;Energy metabolism;Nervous system	ko01100//Metabolic pathways;ko04714//Thermogenesis;ko05016//Huntington disease;ko05010//Alzheimer disease;ko04932//Non-alcoholic fatty liver disease (NAFLD);ko05012//Parkinson disease;ko00190//Oxidative phosphorylation;ko04723//Retrograde endocannabinoid signaling	K03951;K03951;K03951;K03951;K03951;K03951;K03951;K03951	-	-	-
PH2	ncbi_113815850	PHF5A	1.236500205	0.848555255	0.543181967	3.90E-151	1.04E-146	PHF5A	PREDICTED: PHD finger-like domain-containing protein 5A [Hyalella azteca]	Genetic Information Processing	Transcription	ko03040//Spliceosome	K12834	-	GO:0016741//transferase activity, transferring one-carbon groups	GO:0008152//metabolic process
PH2	ncbi_113828172	Ran	1.643772609	1.10445356	0.57367798	4.18E-149	1.12E-144	Ran	Ran protein [Penaeus monodon]	Genetic Information Processing;Human Diseases;Human Diseases;Genetic Information Processing	Translation;Infectious diseases;Infectious diseases;Translation	ko03013//RNA transport;ko05166//HTLV-I infection;ko05169//Epstein-Barr virus infection;ko03008//Ribosome biogenesis in eukaryotes	K07936;K07936;K07936;K07936	GO:0044464//cell part	GO:0017111//nucleoside-triphosphatase activity;GO:0032550//purine ribonucleoside binding	GO:0015031//protein transport;GO:0016482//cytoplasmic transport;GO:0035556//intracellular signal transduction
PH2	ncbi_113807134	Gtp-bp	1.855913615	1.287726023	0.527303883	5.49E-149	1.47E-144	Gtp-bp	PREDICTED: signal recognition particle receptor subunit alpha homolog isoform X2 [Copidosoma floridanum]	Genetic Information Processing	Folding, sorting and degradation	ko03060//Protein export	K13431	-	-	-
PH2	ncbi_113811622	ncbi_113811622	2.33459375	1.725800259	0.435906025	2.36E-148	6.32E-144	--	-	-	-	-	-	-	-	-
PH2	ncbi_113821274	TM9SF3	1.393369607	0.937129125	0.572258247	3.17E-148	8.50E-144	TM9SF3	PREDICTED: transmembrane 9 superfamily member 3-like [Hyalella azteca]	-	-	-	-	-	-	-
PH2	ncbi_113805923	SRRM1	2.422921687	1.754872729	0.465381371	1.06E-147	2.83E-143	SRRM1	PREDICTED: serine/arginine repetitive matrix protein 1 isoform X2 [Halyomorpha halys]	Genetic Information Processing;Genetic Information Processing	Translation;Translation	ko03013//RNA transport;ko03015//mRNA surveillance pathway	K13171;K13171	-	-	-
PH2	ncbi_113812569	DDX39B	1.095709784	0.70914905	0.627704936	5.19E-147	1.39E-142	DDX39B	PREDICTED: spliceosome RNA helicase DDX39B-like [Hyalella azteca]	Genetic Information Processing;Human Diseases;Genetic Information Processing;Genetic Information Processing	Translation;Infectious diseases;Transcription;Translation	ko03013//RNA transport;ko05164//Influenza A;ko03040//Spliceosome;ko03015//mRNA surveillance pathway	K12812;K12812;K12812;K12812	GO:0016604//nuclear body;GO:0043234//protein complex;GO:0097525//spliceosomal snRNP complex	GO:0003724//RNA helicase activity;GO:0005515//protein binding;GO:0017069//snRNA binding;GO:0032550//purine ribonucleoside binding;GO:0042623//ATPase activity, coupled	GO:0000077//DNA damage checkpoint;GO:0000377//RNA splicing, via transesterification reactions with bulged adenosine as nucleophile;GO:0006406//mRNA export from nucleus;GO:0022618//ribonucleoprotein complex assembly;GO:0032784//regulation of DNA-templated transcription, elongation
PH2	ncbi_113812564	AKR1B1	2.957410519	2.198804903	0.427614917	9.53E-147	2.55E-142	AKR1B1	prostaglandin F synthase [Penaeus monodon]	Metabolism;Metabolism;Metabolism;Metabolism;Metabolism;Metabolism	Global and overview maps;Lipid metabolism;Carbohydrate metabolism;Carbohydrate metabolism;Metabolism of cofactors and vitamins;Carbohydrate metabolism	ko01100//Metabolic pathways;ko00561//Glycerolipid metabolism;ko00051//Fructose and mannose metabolism;ko00040//Pentose and glucuronate interconversions;ko00790//Folate biosynthesis;ko00052//Galactose metabolism	K00011;K00011;K00011;K00011;K00011;K00011	-	-	-
PH2	ncbi_113809197	DYNLRB2	2.153974148	1.534481397	0.489249779	2.70E-146	7.23E-142	DYNLRB2	PREDICTED: dynein light chain roadblock-type 2-like [Hyalella azteca]	-	-	-	-	-	-	-
PH2	ncbi_113799973	LIMS2	2.274402946	1.634013186	0.477068247	9.40E-146	2.52E-141	LIMS2	PREDICTED: PDZ and LIM domain protein 5-like [Hyalella azteca]	-	-	-	-	-	GO:0043169//cation binding	-
PH2	ncbi_113809449	SND1	1.114685239	0.707134541	0.656579747	4.09E-145	1.10E-140	SND1	Tudor staphylococcal nuclease [Penaeus monodon]	-	-	-	-	-	-	-
PH2	ncbi_113819369	Lsm2	2.133295314	1.566256058	0.445763604	7.30E-145	1.96E-140	Lsm2	PREDICTED: U6 snRNA-associated Sm-like protein LSm2 isoform X3 [Hyalella azteca]	Genetic Information Processing;Genetic Information Processing	Transcription;Folding, sorting and degradation	ko03040//Spliceosome;ko03018//RNA degradation	K12621;K12621	GO:0005681//spliceosomal complex;GO:0031981//nuclear lumen;GO:0044444//cytoplasmic part	GO:0017016//Ras GTPase binding;GO:0017069//snRNA binding;GO:0019900//kinase binding	GO:0000291//nuclear-transcribed mRNA catabolic process, exonucleolytic;GO:0000377//RNA splicing, via transesterification reactions with bulged adenosine as nucleophile
PH2	ncbi_113817395	Mcee	0.975617741	0.632293062	0.625722604	1.91E-143	5.11E-139	Mcee	PREDICTED: methylmalonyl-CoA epimerase, mitochondrial isoform X1 [Austrofundulus limnaeus]	Metabolism;Metabolism;Metabolism;Metabolism;Metabolism	Global and overview maps;Global and overview maps;Amino acid metabolism;Carbohydrate metabolism;Carbohydrate metabolism	ko01100//Metabolic pathways;ko01200//Carbon metabolism;ko00280//Valine, leucine and isoleucine degradation;ko00630//Glyoxylate and dicarboxylate metabolism;ko00640//Propanoate metabolism	K05606;K05606;K05606;K05606;K05606	GO:0043231//intracellular membrane-bounded organelle	-	GO:0015936//coenzyme A metabolic process
PH2	ncbi_113812538	ncbi_113812538	1.948125418	1.39746835	0.479270951	4.68E-143	1.25E-138	--	death-associated protein-like [Penaeus monodon]	-	-	-	-	-	-	-
PH2	ncbi_113806389	RTRAF	1.585520448	1.136313016	0.480596179	7.82E-139	2.10E-134	RTRAF	PREDICTED: UPF0568 protein C14orf166 homolog isoform X1 [Hyalella azteca]	-	-	-	-	-	-	-
PH2	ncbi_113805128	BRD2	1.475924433	1.055653855	0.483481999	2.59E-138	6.94E-134	BRD2	PREDICTED: bromodomain-containing protein 3-like [Hyalella azteca]	-	-	-	-	-	-	-
PH2	ncbi_113803127	Tstd3	0.493787757	0.264139852	0.902589083	7.00E-138	1.88E-133	Tstd3	PREDICTED: 3-mercaptopyruvate sulfurtransferase-like [Hyalella azteca]	-	-	-	-	-	-	-
PH2	ncbi_113817751	Uchl5	2.440260814	1.834119992	0.411947324	8.38E-138	2.25E-133	Uchl5	ubiquitin carboxyl-terminal hydrolase isozyme L5 [Scylla paramamosain]	-	-	-	-	GO:0044464//cell part	GO:0008238//exopeptidase activity	GO:0019941//modification-dependent protein catabolic process
PH2	ncbi_113829113	sars	2.447349338	1.808949328	0.436068052	1.57E-135	4.20E-131	sars	Seryl-tRNA synthetase, cytoplasmic [Zootermopsis nevadensis]	Genetic Information Processing	Translation	ko00970//Aminoacyl-tRNA biosynthesis	K01875	-	-	-
PH2	ncbi_113822660	CG5021	0.693691963	0.410372595	0.757360782	2.19E-135	5.87E-131	CG5021	PREDICTED: uncharacterized Golgi apparatus membrane protein-like protein CG5021 isoform X1 [Hyalella azteca]	-	-	-	-	-	-	-
PH2	ncbi_113825790	dauE	0.914758649	0.583545849	0.648545138	1.84E-134	4.92E-130	dauE	3-oxoacyl-[acyl-carrier-protein] reductase [Zootermopsis nevadensis]	-	-	-	-	-	GO:0003824//catalytic activity	GO:0044710//single-organism metabolic process
PH2	ncbi_113824583	cutC	0.969724141	0.631751465	0.618217296	1.95E-134	5.21E-130	cutC	PREDICTED: copper homeostasis protein cutC homolog isoform X1 [Hyalella azteca]	-	-	-	-	-	-	-
PH2	ncbi_113809069	ncbi_113809069	1.252222558	0.82250391	0.606396552	4.43E-134	1.19E-129	--	AGAP012926-PA-like protein [Anopheles sinensis]	-	-	-	-	-	-	-
PH2	ncbi_113807092	glrx5	1.711966305	1.203078644	0.508923354	1.70E-133	4.56E-129	glrx5	PREDICTED: glutaredoxin-related protein 5, mitochondrial-like [Hyalella azteca]	-	-	-	-	-	GO:0015036//disulfide oxidoreductase activity	GO:0019725//cellular homeostasis;GO:0044710//single-organism metabolic process
PH2	ncbi_113829226	Rpn8	2.234852274	1.666921158	0.422993602	3.26E-133	8.72E-129	Rpn8	regulatory particle non-ATPase 8, isoform A [Drosophila melanogaster]	Human Diseases;Genetic Information Processing	Infectious diseases;Folding, sorting and degradation	ko05169//Epstein-Barr virus infection;ko03050//Proteasome	K03038;K03038	GO:0005838//proteasome regulatory particle;GO:0043005//neuron projection	-	GO:0006511//ubiquitin-dependent protein catabolic process;GO:0030154//cell differentiation;GO:0051231//spindle elongation
PH2	ncbi_113806677	porin	1.53939142	1.046016276	0.557454811	3.61E-133	9.66E-129	porin	voltage-dependent anion-selective channel [Eriocheir sinensis]	Human Diseases;Human Diseases;Environmental Information Processing;Cellular Processes;Human Diseases;Environmental Information Processing;Cellular Processes;Organismal Systems;Organismal Systems;Cellular Processes	Neurodegenerative diseases;Infectious diseases;Signal transduction;Cell growth and death;Neurodegenerative diseases;Signal transduction;Cell growth and death;Immune system;Digestive system;Cell growth and death	ko05016//Huntington disease;ko05166//HTLV-I infection;ko04022//cGMP - PKG signaling pathway;ko04217//Necroptosis;ko05012//Parkinson disease;ko04020//Calcium signaling pathway;ko04218//Cellular senescence;ko04621//NOD-like receptor signaling pathway;ko04979//Cholesterol metabolism;ko04216//Ferroptosis	K15040;K15040;K15040;K15040;K15040;K15040;K15040;K15040;K15040;K15040	-	GO:0005244//voltage-gated ion channel activity	GO:0006820//anion transport;GO:0034765//regulation of ion transmembrane transport
PH2	ncbi_113807867	Vrk1	0.624318112	0.349316632	0.837745984	7.90E-133	2.12E-128	Vrk1	PREDICTED: serine/threonine-protein kinase VRK1-like [Hyalella azteca]	-	-	-	-	-	GO:0004674//protein serine/threonine kinase activity	GO:0006796//phosphate-containing compound metabolic process
PH2	ncbi_113814788	Su(var)205	0.845123471	0.550883726	0.617414288	1.11E-132	2.97E-128	Su(var)205	PREDICTED: M-phase phosphoprotein 8 isoform X3 [Bactrocera oleae]	Metabolism	Amino acid metabolism	ko00310//Lysine degradation	K11419	-	-	-
PH2	ncbi_113805672	MBD2	0.740171444	0.459841945	0.686721409	1.53E-132	4.10E-128	MBD2	Methyl-CpG-binding domain protein 2 [Zootermopsis nevadensis]	-	-	-	-	GO:0043231//intracellular membrane-bounded organelle	-	-
PH2	ncbi_113814166	TAF10	0.821582022	0.522237178	0.653699445	4.36E-132	1.17E-127	TAF10	PREDICTED: transcription initiation factor TFIID subunit 10-like [Branchiostoma belcheri]	Human Diseases;Genetic Information Processing	Infectious diseases;Transcription	ko05168//Herpes simplex infection;ko03022//Basal transcription factors	K03134;K03134	-	-	GO:0032774//RNA biosynthetic process
PH2	ncbi_113823598	ncbi_113823598	0.520206046	0.272235692	0.934226938	3.81E-131	1.02E-126	--	PREDICTED: heme oxygenase 1-like [Hyalella azteca]	Metabolism;Metabolism;Organismal Systems	Global and overview maps;Metabolism of cofactors and vitamins;Digestive system	ko01100//Metabolic pathways;ko00860//Porphyrin and chlorophyll metabolism;ko04978//Mineral absorption	K21418;K21418;K21418	-	-	-
PH2	ncbi_113828284	RAB2A	1.714961352	1.272670493	0.430317125	4.19E-131	1.12E-126	RAB2A	PREDICTED: ras-related protein Rab-2-like [Hyalella azteca]	Environmental Information Processing	Signal transduction	ko04152//AMPK signaling pathway	K07877	GO:0016020//membrane;GO:0043226//organelle;GO:0044297//cell body	GO:0017111//nucleoside-triphosphatase activity;GO:0032550//purine ribonucleoside binding	GO:0006810//transport;GO:0007265//Ras protein signal transduction;GO:0008104//protein localization
PH2	ncbi_113812130	4CL5	2.09253438	1.57232886	0.412348331	1.59E-130	4.25E-126	4CL5	PREDICTED: 4-coumarate--CoA ligase 1 isoform X1 [Strongylocentrotus purpuratus]	Metabolism;Metabolism;Metabolism	Global and overview maps;Amino acid metabolism;Metabolism of cofactors and vitamins	ko01100//Metabolic pathways;ko00360//Phenylalanine metabolism;ko00130//Ubiquinone and other terpenoid-quinone biosynthesis	K01904;K01904;K01904	-	-	-
PH2	ncbi_113823360	BCAS2	1.26652055	0.856756735	0.563912953	2.28E-130	6.09E-126	BCAS2	PREDICTED: pre-mRNA-splicing factor SPF27-like [Hyalella azteca]	Genetic Information Processing	Transcription	ko03040//Spliceosome	K12861	-	-	-
PH2	ncbi_113818824	HSD17B12	0.588050962	0.334451094	0.814145923	2.78E-130	7.46E-126	HSD17B12	PREDICTED: very-long-chain 3-oxoacyl-CoA reductase-like [Hyalella azteca]	Metabolism;Metabolism;Metabolism;Metabolism;Metabolism	Global and overview maps;Global and overview maps;Lipid metabolism;Lipid metabolism;Lipid metabolism	ko01100//Metabolic pathways;ko01212//Fatty acid metabolism;ko00140//Steroid hormone biosynthesis;ko00062//Fatty acid elongation;ko01040//Biosynthesis of unsaturated fatty acids	K10251;K10251;K10251;K10251;K10251	-	-	-
PH2	ncbi_113807868	ncbi_113807868	0.545827079	0.277007926	0.978516714	9.41E-129	2.52E-124	--	-	-	-	-	-	-	-	-
PH2	ncbi_113818381	Taf11	0.895367963	0.596127786	0.586859078	3.38E-128	9.05E-124	Taf11	PREDICTED: transcription initiation factor TFIID subunit 11 [Fopius arisanus]	Genetic Information Processing	Transcription	ko03022//Basal transcription factors	K03135	-	-	-
PH2	ncbi_113806641	DERL1	2.760762901	2.072845835	0.41345417	7.97E-128	2.13E-123	DERL1	PREDICTED: derlin-1-like [Hyalella azteca]	Genetic Information Processing;Human Diseases	Folding, sorting and degradation;Neurodegenerative diseases	ko04141//Protein processing in endoplasmic reticulum;ko05014//Amyotrophic lateral sclerosis (ALS)	K11519;K11519	-	-	-
PH2	ncbi_113804462	Jmjd7	0.711413853	0.413173326	0.783941948	1.79E-127	4.81E-123	Jmjd7	PREDICTED: jmjC domain-containing protein 7 [Saccoglossus kowalevskii]	-	-	-	-	-	-	-
PH2	ncbi_113818185	ZNHIT1	1.186486414	0.81571057	0.540566328	2.14E-127	5.72E-123	ZNHIT1	PREDICTED: zinc finger HIT domain-containing protein 1-like isoform X2 [Hyalella azteca]	-	-	-	-	-	-	-
PH2	ncbi_113802761	ncbi_113802761	0.880206109	0.565651155	0.637928787	3.80E-126	1.02E-121	--	-	-	-	-	-	-	-	-
PH2	ncbi_113813818	for	1.567370632	1.132582055	0.468730794	4.74E-126	1.27E-121	for	PREDICTED: cGMP-dependent protein kinase, isozyme 2 forms cD5/T2-like [Hyalella azteca]	Organismal Systems;Organismal Systems;Environmental Information Processing;Organismal Systems;Cellular Processes;Organismal Systems;Organismal Systems;Organismal Systems;Organismal Systems;Organismal Systems	Environmental adaptation;Immune system;Signal transduction;Circulatory system;Cellular community - eukaryotes;Environmental adaptation;Digestive system;Nervous system;Endocrine system;Sensory system	ko04714//Thermogenesis;ko04611//Platelet activation;ko04022//cGMP - PKG signaling pathway;ko04270//Vascular smooth muscle contraction;ko04540//Gap junction;ko04713//Circadian entrainment;ko04970//Salivary secretion;ko04730//Long-term depression;ko04923//Regulation of lipolysis in adipocyte;ko04740//Olfactory transduction	K07376;K07376;K07376;K07376;K07376;K07376;K07376;K07376;K07376;K07376	-	-	-
PH2	ncbi_113828517	Ciao1	0.799263719	0.513404125	0.638576715	4.78E-126	1.28E-121	Ciao1	PREDICTED: probable cytosolic iron-sulfur protein assembly protein CIAO1 [Trichechus manatus latirostris]	-	-	-	-	GO:0043234//protein complex	-	-
PH2	ncbi_113826345	GluProRS	0.986558976	0.660861253	0.578057886	2.07E-125	5.55E-121	GluProRS	PREDICTED: bifunctional glutamate/proline--tRNA ligase-like [Hyalella azteca]	Metabolism;Metabolism;Genetic Information Processing	Global and overview maps;Metabolism of cofactors and vitamins;Translation	ko01100//Metabolic pathways;ko00860//Porphyrin and chlorophyll metabolism;ko00970//Aminoacyl-tRNA biosynthesis	K14163;K14163;K14163	-	GO:0004812//aminoacyl-tRNA ligase activity	GO:0006418//tRNA aminoacylation for protein translation
PH2	ncbi_113805515	Stim	0.694927079	0.443649954	0.647439782	1.41E-123	3.77E-119	Stim	PREDICTED: stromal interaction molecule homolog [Dinoponera quadriceps]	Organismal Systems;Environmental Information Processing	Immune system;Signal transduction	ko04611//Platelet activation;ko04020//Calcium signaling pathway	K16059;K16059	-	-	-
PH2	ncbi_113815009	EMG1	0.666496426	0.44284888	0.58978267	1.25E-122	3.34E-118	EMG1	PREDICTED: ribosomal RNA small subunit methyltransferase NEP1 [Nasonia vitripennis]	Genetic Information Processing	Translation	ko03008//Ribosome biogenesis in eukaryotes	K14568	-	-	-
PH2	ncbi_113810122	ncbi_113810122	1.977199257	1.470660273	0.426994252	1.74E-122	4.65E-118	--	-	-	-	-	-	-	-	-
PH2	ncbi_113811605	ncbi_113811605	3.280587642	2.549423804	0.363783043	4.60E-122	1.23E-117	--	-	-	-	-	-	-	-	-
PH2	ncbi_113802256	ncbi_113802256	7.618413419	5.901664156	0.368368755	1.06E-121	2.83E-117	--	-	-	-	-	-	-	-	-
PH2	ncbi_113817338	STRAP	0.940028493	0.601754302	0.643529937	1.79E-121	4.81E-117	STRAP	PREDICTED: serine-threonine kinase receptor-associated protein-like [Hyalella azteca]	Genetic Information Processing	Translation	ko03013//RNA transport	K13137	-	-	-
PH2	ncbi_113817372	hsc71	1.665203082	1.193974627	0.479925955	4.55E-121	1.22E-116	hsc71	heat shock protein 70 [Litopenaeus vannamei]	Genetic Information Processing;Cellular Processes;Human Diseases;Genetic Information Processing;Environmental Information Processing;Organismal Systems;Human Diseases;Human Diseases;Organismal Systems;Human Diseases;Human Diseases;Human Diseases;Organismal Systems	Folding, sorting and degradation;Transport and catabolism;Infectious diseases;Transcription;Signal transduction;Aging;Infectious diseases;Infectious diseases;Endocrine system;Infectious diseases;Infectious diseases;Neurodegenerative diseases;Immune system	ko04141//Protein processing in endoplasmic reticulum;ko04144//Endocytosis;ko05164//Influenza A;ko03040//Spliceosome;ko04010//MAPK signaling pathway;ko04213//Longevity regulating pathway - multiple species;ko05169//Epstein-Barr virus infection;ko05145//Toxoplasmosis;ko04915//Estrogen signaling pathway;ko05162//Measles;ko05134//Legionellosis;ko05020//Prion diseases;ko04612//Antigen processing and p…	K03283;K03283;K03283;K03283;K03283;K03283;K03283;K03283;K03283;K03283;K03283;K03283;K03283	-	-	-
PH2	ncbi_113807359	HDAC1	0.667807038	0.412461067	0.695173352	1.09E-120	2.93E-116	HDAC1	PREDICTED: histone deacetylase Rpd3-like [Hyalella azteca]	Human Diseases;Human Diseases;Organismal Systems;Human Diseases;Human Diseases;Human Diseases;Organismal Systems;Human Diseases;Human Diseases;Human Diseases;Cellular Processes;Human Diseases;Human Diseases;Environmental Information Processing	Cancers;Infectious diseases;Endocrine system;Neurodegenerative diseases;Cancers;Cancers;Aging;Substance dependence;Cancers;Infectious diseases;Cell growth and death;Cancers;Substance dependence;Signal transduction	ko05200//Pathways in cancer;ko05165//Human papillomavirus infection;ko04919//Thyroid hormone signaling pathway;ko05016//Huntington disease;ko05202//Transcriptional misregulation in cancers;ko05206//MicroRNAs in cancer;ko04213//Longevity regulating pathway - multiple species;ko05034//Alcoholism;ko05203//Viral carcinogenesis;ko05169//Epstein-Barr virus infection;ko04110//Cell cycle;ko05220//Chronic…	K06067;K06067;K06067;K06067;K06067;K06067;K06067;K06067;K06067;K06067;K06067;K06067;K06067;K06067	-	-	-
PH2	ncbi_113806266	SmF	2.963311723	2.302940286	0.363733394	1.10E-120	2.95E-116	SmF	PREDICTED: small nuclear ribonucleoprotein F-like [Hyalella azteca]	Genetic Information Processing	Transcription	ko03040//Spliceosome	K11098	GO:0030529//intracellular ribonucleoprotein complex;GO:0043231//intracellular membrane-bounded organelle;GO:0044423//virion part	-	GO:0006396//RNA processing
PH2	ncbi_113817644	PDHB	1.321430858	0.931162916	0.504995431	1.21E-120	3.24E-116	PDHB	Pyruvate dehydrogenase E1 component subunit beta, mitochondrial [Zootermopsis nevadensis]	Metabolism;Metabolism;Metabolism;Environmental Information Processing;Organismal Systems;Human Diseases;Metabolism;Metabolism	Global and overview maps;Global and overview maps;Carbohydrate metabolism;Signal transduction;Endocrine system;Cancers;Carbohydrate metabolism;Carbohydrate metabolism	ko01100//Metabolic pathways;ko01200//Carbon metabolism;ko00010//Glycolysis / Gluconeogenesis;ko04066//HIF-1 signaling pathway;ko04922//Glucagon signaling pathway;ko05230//Central carbon metabolism in cancer;ko00020//Citrate cycle (TCA cycle);ko00620//Pyruvate metabolism	K00162;K00162;K00162;K00162;K00162;K00162;K00162;K00162	-	-	-
PH2	ncbi_113823506	SmE	2.11808644	1.601347368	0.403475173	2.30E-120	6.17E-116	SmE	PREDICTED: probable small nuclear ribonucleoprotein E [Hyalella azteca]	Genetic Information Processing	Transcription	ko03040//Spliceosome	K11097	GO:0030529//intracellular ribonucleoprotein complex	-	-
PH2	ncbi_113813684	ANKMY2	1.175065818	0.827173971	0.506478873	2.90E-120	7.78E-116	ANKMY2	PREDICTED: ankyrin repeat and MYND domain-containing protein 2-like [Hyalella azteca]	-	-	-	-	-	-	-
PH2	ncbi_113820497	Sdhaf3	1.049397981	0.696348763	0.59167996	4.34E-120	1.16E-115	Sdhaf3	PREDICTED: succinate dehydrogenase assembly factor 3, mitochondrial-like isoform X3 [Cephus cinctus]	-	-	-	-	-	-	-
PH2	ncbi_113820513	ncbi_113820513	0.692026524	0.433740585	0.673994892	4.84E-120	1.30E-115	--	-	-	-	-	-	-	-	-
PH2	ncbi_113804205	Srp19	2.697773759	2.103480278	0.358991074	1.07E-119	2.87E-115	Srp19	GM13769 [Drosophila sechellia]	Genetic Information Processing	Folding, sorting and degradation	ko03060//Protein export	K03105	-	-	-
PH2	ncbi_113814752	SRP72	1.025778104	0.68647249	0.57944487	1.52E-119	4.06E-115	SRP72	Signal recognition particle 72 kDa protein [Zootermopsis nevadensis]	Genetic Information Processing	Folding, sorting and degradation	ko03060//Protein export	K03108	GO:0030529//intracellular ribonucleoprotein complex	-	-
PH2	ncbi_113820651	SRSF1	1.256810674	0.89525787	0.489392137	1.94E-119	5.20E-115	SRSF1	TPA_inf: alternative splicing factor ASF/SF2 [Amblyomma variegatum]	Genetic Information Processing;Human Diseases;Organismal Systems	Transcription;Infectious diseases;Immune system	ko03040//Spliceosome;ko05168//Herpes simplex infection;ko04657//IL-17 signaling pathway	K12890;K12890;K12890	-	GO:0097159//organic cyclic compound binding	-
PH2	ncbi_113803087	Txn2	1.324085152	0.945130937	0.486409787	9.47E-118	2.54E-113	Txn2	thioredoxin [Scylla paramamosain]	Human Diseases;Organismal Systems	Cardiovascular diseases;Immune system	ko05418//Fluid shear stress and atherosclerosis;ko04621//NOD-like receptor signaling pathway	K03671;K03671	-	GO:0015036//disulfide oxidoreductase activity	GO:0019725//cellular homeostasis;GO:0044710//single-organism metabolic process
PH2	ncbi_113822156	NDUFS4	2.308181776	1.786855042	0.369334243	2.53E-117	6.78E-113	NDUFS4	PREDICTED: NADH dehydrogenase [ubiquinone] iron-sulfur protein 4, mitochondrial-like [Hyalella azteca]	Metabolism;Organismal Systems;Human Diseases;Human Diseases;Human Diseases;Human Diseases;Metabolism;Organismal Systems	Global and overview maps;Environmental adaptation;Neurodegenerative diseases;Neurodegenerative diseases;Endocrine and metabolic diseases;Neurodegenerative diseases;Energy metabolism;Nervous system	ko01100//Metabolic pathways;ko04714//Thermogenesis;ko05016//Huntington disease;ko05010//Alzheimer disease;ko04932//Non-alcoholic fatty liver disease (NAFLD);ko05012//Parkinson disease;ko00190//Oxidative phosphorylation;ko04723//Retrograde endocannabinoid signaling	K03937;K03937;K03937;K03937;K03937;K03937;K03937;K03937	-	-	-
PH2	ncbi_113825702	NDUFA12	1.482923952	1.093473032	0.439526975	3.20E-117	8.58E-113	NDUFA12	Probable NADH dehydrogenase 1 alpha subcomplex subunit 12 [Caligus rogercresseyi]	Metabolism;Organismal Systems;Human Diseases;Human Diseases;Human Diseases;Human Diseases;Metabolism;Organismal Systems	Global and overview maps;Environmental adaptation;Neurodegenerative diseases;Neurodegenerative diseases;Endocrine and metabolic diseases;Neurodegenerative diseases;Energy metabolism;Nervous system	ko01100//Metabolic pathways;ko04714//Thermogenesis;ko05016//Huntington disease;ko05010//Alzheimer disease;ko04932//Non-alcoholic fatty liver disease (NAFLD);ko05012//Parkinson disease;ko00190//Oxidative phosphorylation;ko04723//Retrograde endocannabinoid signaling	K11352;K11352;K11352;K11352;K11352;K11352;K11352;K11352	-	-	-
PH2	ncbi_113818098	Max	2.478154604	1.918613876	0.369201799	3.24E-117	8.68E-113	Max	PREDICTED: protein max isoform X1 [Ceratina calcarata]	Human Diseases;Human Diseases;Environmental Information Processing;Human Diseases	Cancers;Cancers;Signal transduction;Cancers	ko05200//Pathways in cancer;ko05202//Transcriptional misregulation in cancers;ko04010//MAPK signaling pathway;ko05222//Small cell lung cancer	K04453;K04453;K04453;K04453	GO:0043231//intracellular membrane-bounded organelle	GO:0005515//protein binding	GO:0010468//regulation of gene expression
PH2	ncbi_113817273	ncbi_113817273	0.682885351	0.411986687	0.729045668	4.21E-117	1.13E-112	--	-	-	-	-	-	-	-	-
PH2	ncbi_113821530	Sirup	0.503774574	0.296465093	0.764916065	4.26E-117	1.14E-112	Sirup	PREDICTED: succinate dehydrogenase assembly factor 4, mitochondrial-like [Bemisia tabaci]	-	-	-	-	-	-	-
PH2	ncbi_113805139	VAPA	1.307509543	0.937426589	0.480043855	6.47E-117	1.73E-112	VAPA	TPA_exp: VAMP-associated protein [Amblyomma variegatum]	Organismal Systems	Digestive system	ko04979//Cholesterol metabolism	K10707	-	-	-
PH2	ncbi_113810820	tmem256	1.132564774	0.769276747	0.558018958	7.81E-117	2.09E-112	tmem256	PREDICTED: transmembrane protein 256 homolog isoform X1 [Hyalella azteca]	-	-	-	-	-	-	GO:0006812//cation transport
PH2	ncbi_113813439	Stoml2	0.497550515	0.284827909	0.804752492	9.76E-117	2.61E-112	Stoml2	PREDICTED: stomatin-like protein 2, mitochondrial [Hyalella azteca]	-	-	-	-	-	-	-
PH2	ncbi_113823271	CCT2	1.189646503	0.847293211	0.489599733	5.07E-116	1.36E-111	CCT2	Tcp-1-beta [Litopenaeus vannamei]	-	-	-	-	-	GO:0005515//protein binding	GO:0044267//cellular protein metabolic process
PH2	ncbi_113813433	gmppaa	0.508283585	0.281268398	0.853686173	8.06E-116	2.16E-111	gmppaa	PREDICTED: mannose-1-phosphate guanyltransferase alpha-like isoform X1 [Hyalella azteca]	Metabolism;Metabolism;Metabolism	Global and overview maps;Carbohydrate metabolism;Carbohydrate metabolism	ko01100//Metabolic pathways;ko00520//Amino sugar and nucleotide sugar metabolism;ko00051//Fructose and mannose metabolism	K00966;K00966;K00966	-	GO:0016740//transferase activity	-
PH2	ncbi_113827822	Scsalpha	2.35724908	1.832682946	0.363146989	2.39E-115	6.40E-111	Scsalpha	PREDICTED: succinyl-CoA ligase subunit alpha, mitochondrial-like [Hyalella azteca]	Metabolism;Metabolism;Metabolism;Metabolism	Global and overview maps;Global and overview maps;Carbohydrate metabolism;Carbohydrate metabolism	ko01100//Metabolic pathways;ko01200//Carbon metabolism;ko00020//Citrate cycle (TCA cycle);ko00640//Propanoate metabolism	K01899;K01899;K01899;K01899	-	GO:0004774//succinate-CoA ligase activity;GO:0005488//binding;GO:0046912//transferase activity, transferring acyl groups, acyl groups converted into alkyl on transfer	-
PH2	ncbi_113812454	mRpS25	2.539669679	1.936185458	0.391423718	1.55E-114	4.14E-110	mRpS25	mitochondrial ribosomal protein S25 [Riptortus pedestris]	-	-	-	-	-	-	-
PH2	ncbi_113819755	snRNP-U1-70K	0.556954736	0.332349545	0.744858706	2.13E-114	5.70E-110	snRNP-U1-70K	PREDICTED: U1 small nuclear ribonucleoprotein 70 kDa-like [Hyalella azteca]	Genetic Information Processing	Transcription	ko03040//Spliceosome	K11093	-	-	-
PH2	ncbi_113817546	SLU7	0.738606213	0.475225658	0.636192668	7.80E-114	2.09E-109	SLU7	PREDICTED: pre-mRNA-splicing factor SLU7-like [Hyalella azteca]	Genetic Information Processing	Transcription	ko03040//Spliceosome	K12819	-	-	-
PH2	ncbi_113824259	RAB1A	1.648627229	1.220607885	0.433665412	1.10E-113	2.96E-109	RAB1A	organellar Rab protein [Litopenaeus vannamei]	Human Diseases	Infectious diseases	ko05134//Legionellosis	K07874	-	-	-
PH2	ncbi_113817302	nosip	0.712688104	0.449022926	0.666481738	1.20E-113	3.21E-109	nosip	nitric oxide synthase inihibitory protein [Gecarcinus lateralis]	-	-	-	-	-	-	-
PH2	ncbi_113803205	Emc8	1.315048286	0.925883738	0.506212821	1.40E-113	3.76E-109	Emc8	COX4 neighbor protein, partial [Cherax quadricarinatus]	-	-	-	-	-	-	-
PH2	ncbi_113816540	ncbi_113816540	0.554738256	0.340489924	0.704195116	1.57E-113	4.21E-109	--	PREDICTED: uncharacterized protein LOC108682462 [Hyalella azteca]	-	-	-	-	-	-	-
PH2	ncbi_113824316	DHRS4	1.278286119	0.91942003	0.47541479	2.30E-113	6.16E-109	DHRS4	PREDICTED: dehydrogenase/reductase SDR family member 4-like [Hyalella azteca]	Metabolism;Cellular Processes;Metabolism	Global and overview maps;Transport and catabolism;Metabolism of cofactors and vitamins	ko01100//Metabolic pathways;ko04146//Peroxisome;ko00830//Retinol metabolism	K11147;K11147;K11147	-	-	-
PH2	ncbi_113828091	UCHL3	1.725599208	1.315082692	0.391943901	3.62E-113	9.70E-109	UCHL3	ubiquitin carboxyl-terminal esterase L3 [Penaeus monodon]	-	-	-	-	-	GO:0070011//peptidase activity, acting on L-amino acid peptides	GO:0006508//proteolysis;GO:0009987//cellular process
PH2	ncbi_113817337	rnps1-a	1.606019851	1.197633096	0.423303729	5.67E-113	1.52E-108	rnps1-a	PREDICTED: RNA-binding protein with serine-rich domain 1-B-like [Hyalella azteca]	Genetic Information Processing;Genetic Information Processing	Translation;Translation	ko03013//RNA transport;ko03015//mRNA surveillance pathway	K14325;K14325	-	-	-
PH2	ncbi_113828312	sod-2	0.876081066	0.590581283	0.568928737	4.77E-112	1.28E-107	sod-2	mitochondrial manganese superoxide dismutase [Fenneropenaeus chinensis]	Human Diseases;Environmental Information Processing;Organismal Systems;Cellular Processes;Environmental Information Processing;Organismal Systems;Organismal Systems	Neurodegenerative diseases;Signal transduction;Aging;Transport and catabolism;Signal transduction;Aging;Aging	ko05016//Huntington disease;ko04013//MAPK signaling pathway - fly;ko04213//Longevity regulating pathway - multiple species;ko04146//Peroxisome;ko04068//FoxO signaling pathway;ko04212//Longevity regulating pathway - worm;ko04211//Longevity regulating pathway - mammal	K04564;K04564;K04564;K04564;K04564;K04564;K04564	-	-	-
PH2	ncbi_113823592	PSMD13	1.897170812	1.439851259	0.397929794	6.56E-112	1.76E-107	PSMD13	PREDICTED: 26S proteasome non-ATPase regulatory subunit 13-like [Hyalella azteca]	Human Diseases;Genetic Information Processing	Infectious diseases;Folding, sorting and degradation	ko05169//Epstein-Barr virus infection;ko03050//Proteasome	K03039;K03039	-	-	-
PH2	ncbi_113819995	Hnrnph1	2.13403426	1.620689277	0.396975818	6.56E-112	1.76E-107	Hnrnph1	PREDICTED: heterogeneous nuclear ribonucleoprotein H-like [Hyalella azteca]	-	-	-	-	-	-	-
PH2	ncbi_113828640	CalpB	0.495303701	0.280666355	0.819457271	8.75E-112	2.34E-107	CalpB	calpain B [Gecarcinus lateralis]	-	-	-	-	-	-	-
PH2	ncbi_113826276	ncbi_113826276	1.283766233	0.965475655	0.411070733	1.25E-111	3.34E-107	--	PREDICTED: protein C9orf72 homolog [Hyalella azteca]	-	-	-	-	-	-	-
PH2	ncbi_113804045	Chchd2	1.87404086	1.387924965	0.433222835	1.55E-111	4.16E-107	Chchd2	coiled-coil-helix-coiled-coil-helix domain-containing protein 2, mitochondrial-like protein [Danaus plexippus]	-	-	-	-	-	-	-
PH2	ncbi_113801300	U2af50	1.457714914	1.079421132	0.433450762	1.73E-111	4.64E-107	U2af50	PREDICTED: splicing factor U2AF 50 kDa subunit-like isoform X2 [Hyalella azteca]	Genetic Information Processing	Transcription	ko03040//Spliceosome	K12837	-	-	-
PH2	ncbi_113826905	Prps1	0.735446242	0.480007308	0.615563519	1.88E-111	5.04E-107	Prps1	PREDICTED: ribose-phosphate pyrophosphokinase 1 isoform X2 [Halyomorpha halys]	Metabolism;Metabolism;Metabolism;Metabolism;Metabolism	Global and overview maps;Nucleotide metabolism;Global and overview maps;Global and overview maps;Carbohydrate metabolism	ko01100//Metabolic pathways;ko00230//Purine metabolism;ko01200//Carbon metabolism;ko01230//Biosynthesis of amino acids;ko00030//Pentose phosphate pathway	K00948;K00948;K00948;K00948;K00948	-	-	-
PH2	ncbi_113812420	Phum_PHUM462900	0.437880633	0.249202147	0.813221143	1.47E-110	3.94E-106	Phum_PHUM462900	PREDICTED: inosine triphosphate pyrophosphatase-like [Hyalella azteca]	Metabolism;Metabolism;Metabolism	Global and overview maps;Nucleotide metabolism;Xenobiotics biodegradation and metabolism	ko01100//Metabolic pathways;ko00230//Purine metabolism;ko00983//Drug metabolism - other enzymes	K01519;K01519;K01519	GO:0044424//intracellular part	GO:0043169//cation binding;GO:0047429//nucleoside-triphosphate diphosphatase activity	GO:0006996//organelle organization;GO:0009143//nucleoside triphosphate catabolic process;GO:0009154//purine ribonucleotide catabolic process
PH2	ncbi_113817797	hyou1	2.038928723	1.519089919	0.424604073	3.58E-110	9.59E-106	hyou1	PREDICTED: hypoxia up-regulated protein 1 [Trichogramma pretiosum]	Genetic Information Processing	Folding, sorting and degradation	ko04141//Protein processing in endoplasmic reticulum	K09486	-	-	-
PH2	ncbi_113799903	PPIL3	0.78060745	0.512842462	0.606081514	6.75E-110	1.81E-105	PPIL3	PREDICTED: peptidyl-prolyl cis-trans isomerase-like 3 [Neodiprion lecontei]	-	-	-	-	-	GO:0016859//cis-trans isomerase activity	GO:0044267//cellular protein metabolic process
PH2	ncbi_113803914	Golt1b	0.684491408	0.44036314	0.63633872	1.78E-109	4.77E-105	Golt1b	PREDICTED: vesicle transport protein GOT1B-like [Hyalella azteca]	-	-	-	-	-	-	-
PH2	ncbi_113817101	ncbi_113817101	0.976465813	0.67981951	0.522417769	3.14E-109	8.41E-105	--	-	-	-	-	-	-	-	-
PH2	ncbi_113827213	ncbi_113827213	1.327103295	0.980944894	0.436036669	3.78E-109	1.01E-104	--	PREDICTED: protein QIL1-like isoform X1 [Limulus polyphemus]	-	-	-	-	-	-	-
PH2	ncbi_113821650	GA21225	1.531589854	1.138973765	0.427295492	1.52E-108	4.08E-104	GA21225	PREDICTED: zinc finger CCCH domain-containing protein 15 homolog [Plutella xylostella]	-	-	-	-	-	-	-
PH2	ncbi_113804724	porin	1.310057508	0.860221736	0.606849652	1.91E-108	5.13E-104	porin	voltage-dependent anion-selective channel [Eriocheir sinensis]	Human Diseases;Human Diseases;Environmental Information Processing;Cellular Processes;Human Diseases;Environmental Information Processing;Cellular Processes;Organismal Systems;Organismal Systems;Cellular Processes	Neurodegenerative diseases;Infectious diseases;Signal transduction;Cell growth and death;Neurodegenerative diseases;Signal transduction;Cell growth and death;Immune system;Digestive system;Cell growth and death	ko05016//Huntington disease;ko05166//HTLV-I infection;ko04022//cGMP - PKG signaling pathway;ko04217//Necroptosis;ko05012//Parkinson disease;ko04020//Calcium signaling pathway;ko04218//Cellular senescence;ko04621//NOD-like receptor signaling pathway;ko04979//Cholesterol metabolism;ko04216//Ferroptosis	K15040;K15040;K15040;K15040;K15040;K15040;K15040;K15040;K15040;K15040	-	GO:0005244//voltage-gated ion channel activity	GO:0006820//anion transport;GO:0034765//regulation of ion transmembrane transport
PH2	ncbi_113807401	YIPF5	0.924573576	0.636241169	0.539214404	3.74E-108	1.00E-103	YIPF5	Protein YIPF [Daphnia magna]	-	-	-	-	-	-	-
PH2	ncbi_113823334	ncbi_113823334	0.634135854	0.40472191	0.647860995	4.48E-108	1.20E-103	--	PREDICTED: protein Star-like [Cimex lectularius]	-	-	-	-	-	-	-
PH2	ncbi_113830344	ncbi_113830344	1.231658665	0.92028307	0.420452898	8.61E-108	2.31E-103	--	-	-	-	-	-	-	-	-
PH2	ncbi_113818353	rsp-7	0.576588009	0.352605591	0.709485484	2.53E-107	6.78E-103	rsp-7	PREDICTED: probable splicing factor, arginine/serine-rich 7 [Hyalella azteca]	-	-	-	-	-	-	-
PH2	ncbi_113810712	Actn	0.591828439	0.385382542	0.618887804	3.94E-107	1.05E-102	Actn	PREDICTED: alpha-actinin, sarcomeric-like isoform X2 [Hyalella azteca]	Cellular Processes;Cellular Processes;Cellular Processes;Cellular Processes;Human Diseases;Organismal Systems;Human Diseases;Human Diseases	Cellular community - eukaryotes;Cell motility;Cellular community - eukaryotes;Cellular community - eukaryotes;Cancers;Immune system;Infectious diseases;Immune diseases	ko04510//Focal adhesion;ko04810//Regulation of actin cytoskeleton;ko04530//Tight junction;ko04520//Adherens junction;ko05203//Viral carcinogenesis;ko04670//Leukocyte transendothelial migration;ko05146//Amoebiasis;ko05322//Systemic lupus erythematosus	K05699;K05699;K05699;K05699;K05699;K05699;K05699;K05699	-	-	-
PH2	ncbi_113820498	ncbi_113820498	1.700287882	1.324128593	0.360735799	4.40E-107	1.18E-102	--	-	-	-	-	-	-	-	-
PH2	ncbi_113805673	ncbi_113805673	0.710137046	0.507796007	0.48384842	5.58E-107	1.49E-102	--	-	-	-	-	-	-	-	-
PH2	ncbi_113812537	ccdc25	0.915384461	0.621024376	0.559727905	8.52E-107	2.28E-102	ccdc25	PREDICTED: coiled-coil domain-containing protein 25-like [Hyalella azteca]	-	-	-	-	-	-	-
PH2	ncbi_113814737	Aimp1	1.940331229	1.454911907	0.41537115	3.44E-106	9.20E-102	Aimp1	PREDICTED: aminoacyl tRNA synthase complex-interacting multifunctional protein 1-like [Hyalella azteca]	-	-	-	-	-	-	-
PH2	ncbi_113820579	RDH11	0.578884575	0.346513403	0.740364559	3.44E-106	9.22E-102	RDH11	PREDICTED: retinol dehydrogenase 12-like [Hyalella azteca]	Metabolism;Metabolism	Global and overview maps;Metabolism of cofactors and vitamins	ko01100//Metabolic pathways;ko00830//Retinol metabolism	K11153;K11153	-	-	-
PH2	ncbi_113819219	P4HA1	0.857284304	0.538580308	0.670612249	1.11E-105	2.96E-101	P4HA1	Protein CBR-DPY-18 [Caenorhabditis briggsae]	Metabolism;Metabolism	Global and overview maps;Amino acid metabolism	ko01100//Metabolic pathways;ko00330//Arginine and proline metabolism	K00472;K00472	-	GO:0016705//oxidoreductase activity, acting on paired donors, with incorporation or reduction of molecular oxygen;GO:0043167//ion binding	GO:0008152//metabolic process
PH2	ncbi_113828369	ncbi_113828369	0.745101959	0.486241957	0.615763469	1.57E-105	4.20E-101	--	PREDICTED: LOW QUALITY PROTEIN: nuclear fragile X mental retardation-interacting protein 1 [Acromyrmex echinatior]	-	-	-	-	-	-	-
PH2	ncbi_113800333	CLNS1A	1.05428599	0.758129304	0.475750436	1.94E-105	5.19E-101	CLNS1A	PREDICTED: methylosome subunit pICln [Apis florea]	Genetic Information Processing	Translation	ko03013//RNA transport	K05019	GO:0043234//protein complex;GO:0044444//cytoplasmic part	-	GO:0044699//single-organism process
PH2	ncbi_113809607	DCPS	0.986226786	0.690784974	0.513682736	8.78E-105	2.35E-100	DCPS	PREDICTED: m7GpppX diphosphatase [Halyomorpha halys]	Genetic Information Processing	Folding, sorting and degradation	ko03018//RNA degradation	K12584	GO:0043231//intracellular membrane-bounded organelle	GO:0016787//hydrolase activity	GO:0009987//cellular process
PH2	ncbi_113810783	ncbi_113810783	0.757160885	0.477951359	0.663736081	2.28E-104	6.10E-100	--	PREDICTED: zinc finger protein 2 homolog [Hyalella azteca]	-	-	-	-	-	-	-
PH2	ncbi_113825909	mlst8	0.580848174	0.362502106	0.680171733	2.43E-104	6.51E-100	mlst8	PREDICTED: target of rapamycin complex subunit lst8-like [Lingula anatina]	Organismal Systems;Environmental Information Processing;Environmental Information Processing;Cellular Processes;Cellular Processes	Environmental adaptation;Signal transduction;Signal transduction;Transport and catabolism;Transport and catabolism	ko04714//Thermogenesis;ko04151//PI3K-Akt signaling pathway;ko04150//mTOR signaling pathway;ko04140//Autophagy - animal;ko04136//Autophagy - other eukaryotes	K08266;K08266;K08266;K08266;K08266	-	-	GO:0001934//positive regulation of protein phosphorylation;GO:0032006//regulation of TOR signaling;GO:0032970//regulation of actin filament-based process
PH2	ncbi_113821065	NAGA	0.887522516	0.579328599	0.615401834	2.76E-104	7.40E-100	NAGA	PREDICTED: alpha-N-acetylgalactosaminidase-like [Hyalella azteca]	Metabolism;Cellular Processes;Metabolism	Global and overview maps;Transport and catabolism;Glycan biosynthesis and metabolism	ko01100//Metabolic pathways;ko04142//Lysosome;ko00603//Glycosphingolipid biosynthesis - globo and isoglobo series	K01204;K01204;K01204	-	-	-
PH2	ncbi_113810264	Arl1	1.086918806	0.771193502	0.495079373	2.79E-104	7.46E-100	Arl1	ADP-ribosylation factor protein 1, partial [Daphnia magna]	-	-	-	-	GO:0044464//cell part	GO:0032550//purine ribonucleoside binding	GO:0015031//protein transport;GO:0035556//intracellular signal transduction
PH2	ncbi_113830207	ttk	0.62779944	0.429459507	0.547781634	6.23E-104	1.67E-99	ttk	broad-complex-like protein [Macrobrachium nipponense]	-	-	-	-	-	-	-
PH2	ncbi_113826502	Pgam5	0.491585657	0.300851037	0.708393495	9.49E-104	2.54E-99	Pgam5	PREDICTED: serine/threonine-protein phosphatase PGAM5, mitochondrial-like isoform X3 [Hyalella azteca]	Cellular Processes;Environmental Information Processing;Cellular Processes	Cell growth and death;Signal transduction;Transport and catabolism	ko04217//Necroptosis;ko04668//TNF signaling pathway;ko04137//Mitophagy - animal	K15637;K15637;K15637	-	-	-
PH2	ncbi_113806987	MED22	0.903204446	0.647351416	0.480503494	1.52E-103	4.07E-99	MED22	PREDICTED: mediator of RNA polymerase II transcription subunit 22-like [Hyalella azteca]	-	-	-	-	GO:0043234//protein complex	-	GO:0006355//regulation of transcription, DNA-templated
PH2	ncbi_113808989	Adk2	0.569327073	0.367919985	0.629865661	6.25E-103	1.67E-98	Adk2	Adenylate kinase 2, mitochondrial [Daphnia magna]	Metabolism;Metabolism;Metabolism	Global and overview maps;Nucleotide metabolism;Metabolism of cofactors and vitamins	ko01100//Metabolic pathways;ko00230//Purine metabolism;ko00730//Thiamine metabolism	K00939;K00939;K00939	GO:0043231//intracellular membrane-bounded organelle	GO:0016301//kinase activity;GO:0016776//phosphotransferase activity, phosphate group as acceptor;GO:0032550//purine ribonucleoside binding	GO:0009152//purine ribonucleotide biosynthetic process
PH2	ncbi_113804850	ncbi_113804850	0.748313338	0.500630717	0.579895679	6.83E-102	1.83E-97	--	-	-	-	-	-	-	-	-
PH2	ncbi_113825554	Elob	1.744273575	1.331194918	0.389904502	8.15E-102	2.18E-97	Elob	PREDICTED: transcription elongation factor B polypeptide 2-like [Hyalella azteca]	Human Diseases;Genetic Information Processing;Environmental Information Processing;Human Diseases	Cancers;Folding, sorting and degradation;Signal transduction;Cancers	ko05200//Pathways in cancer;ko04120//Ubiquitin mediated proteolysis;ko04066//HIF-1 signaling pathway;ko05211//Renal cell carcinoma	K03873;K03873;K03873;K03873	-	-	-
PH2	ncbi_113816060	SCO1	0.581698138	0.381445571	0.608793474	2.24E-101	5.99E-97	SCO1	SCO1, mitochondrial [Daphnia magna]	Human Diseases	Cancers	ko05230//Central carbon metabolism in cancer	K07152	GO:0019866//organelle inner membrane;GO:0043231//intracellular membrane-bounded organelle	GO:0005507//copper ion binding;GO:0009055//electron carrier activity	GO:0000041//transition metal ion transport;GO:0002164//larval development;GO:0007281//germ cell development;GO:0017004//cytochrome complex assembly;GO:0040011//locomotion;GO:0046916//cellular transition metal ion homeostasis
PH2	ncbi_113823538	PCYT2	1.599598579	1.179223464	0.439872768	5.31E-101	1.42E-96	PCYT2	PREDICTED: ethanolamine-phosphate cytidylyltransferase-like [Hyalella azteca]	Metabolism;Metabolism;Metabolism	Global and overview maps;Lipid metabolism;Metabolism of other amino acids	ko01100//Metabolic pathways;ko00564//Glycerophospholipid metabolism;ko00440//Phosphonate and phosphinate metabolism	K00967;K00967;K00967	-	-	GO:0008152//metabolic process
PH2	ncbi_113809356	csn8	0.802684573	0.540254173	0.57119486	1.36E-100	3.64E-96	csn8	PREDICTED: COP9 signalosome complex subunit 8-like [Lingula anatina]	-	-	-	-	GO:0044424//intracellular part	-	-
PH2	ncbi_113818123	DOLPP1	0.92762652	0.633383296	0.550465247	1.76E-100	4.72E-96	DOLPP1	Dolichyldiphosphatase 1 [Melipona quadrifasciata]	Metabolism	Glycan biosynthesis and metabolism	ko00510//N-Glycan biosynthesis	K07252	-	-	-
PH2	ncbi_113811198	Adar	0.866745588	0.602363968	0.524973115	3.14E-99	8.42E-95	Adar	double-stranded RNA-specific adenosine deaminase [Marsupenaeus japonicus]	-	-	-	-	-	-	-
PH2	ncbi_113829390	emc7	2.234417611	1.716455207	0.380466641	4.86E-99	1.30E-94	emc7	PREDICTED: ER membrane protein complex subunit 7 homolog [Nicrophorus vespilloides]	-	-	-	-	-	-	-
PH2	ncbi_113807293	spcs2	1.228637228	0.803525697	0.612642934	5.62E-99	1.50E-94	spcs2	PREDICTED: probable signal peptidase complex subunit 2 [Hyalella azteca]	Genetic Information Processing	Folding, sorting and degradation	ko03060//Protein export	K12947	-	-	GO:0006508//proteolysis
PH2	ncbi_113814726	YIF1B	1.198769457	0.863341675	0.473550694	2.11E-98	5.65E-94	YIF1B	Protein YIF1B-A [Zootermopsis nevadensis]	-	-	-	-	-	-	-
PH2	ncbi_113807347	pat-4	1.209349169	0.909457258	0.411153103	7.67E-98	2.05E-93	pat-4	PREDICTED: integrin-linked protein kinase homolog pat-4-like [Hyalella azteca]	Cellular Processes;Human Diseases;Organismal Systems;Organismal Systems;Human Diseases	Cellular community - eukaryotes;Infectious diseases;Development;Endocrine system;Cancers	ko04510//Focal adhesion;ko05100//Bacterial invasion of epithelial cells;ko04360//Axon guidance;ko03320//PPAR signaling pathway;ko05213//Endometrial cancer	K06272;K06272;K06272;K06272;K06272	-	GO:0004713//protein tyrosine kinase activity;GO:0032550//purine ribonucleoside binding	GO:0006468//protein phosphorylation;GO:0007166//cell surface receptor signaling pathway;GO:0010646//regulation of cell communication
PH2	ncbi_113818568	ncbi_113818568	0.623075627	0.355994541	0.807552164	9.87E-97	2.64E-92	--	-	-	-	-	-	-	-	-
PH2	ncbi_113823457	HYAL1	0.6851025	0.409647275	0.741937629	1.88E-96	5.04E-92	HYAL1	PREDICTED: hyaluronidase A-like [Bemisia tabaci]	Metabolism;Cellular Processes;Metabolism	Global and overview maps;Transport and catabolism;Glycan biosynthesis and metabolism	ko01100//Metabolic pathways;ko04142//Lysosome;ko00531//Glycosaminoglycan degradation	K01197;K01197;K01197	-	-	-
PH2	ncbi_113827259	Cbr1	1.637627436	1.275912887	0.360077345	2.47E-96	6.62E-92	Cbr1	Carbonyl reductase [NADPH] 1 [Zootermopsis nevadensis]	Metabolism;Human Diseases;Metabolism;Metabolism;Metabolism	Global and overview maps;Cancers;Xenobiotics biodegradation and metabolism;Lipid metabolism;Metabolism of cofactors and vitamins	ko01100//Metabolic pathways;ko05204//Chemical carcinogenesis;ko00980//Metabolism of xenobiotics by cytochrome P450;ko00590//Arachidonic acid metabolism;ko00790//Folate biosynthesis	K00079;K00079;K00079;K00079;K00079	-	-	-
PH2	ncbi_113828234	ncbi_113828234	1.212567134	0.895811489	0.436797549	2.80E-96	7.51E-92	--	PREDICTED: carbohydrate sulfotransferase 1-like [Hyalella azteca]	-	-	-	-	-	-	-
PH2	ncbi_113820746	ncbi_113820746	1.006866705	0.704800347	0.514586164	8.47E-96	2.27E-91	--	PREDICTED: U4/U6.U5 small nuclear ribonucleoprotein 27 kDa protein-like isoform X1 [Hyalella azteca]	-	-	-	-	-	-	-
PH2	ncbi_113809115	ncbi_113809115	0.824001365	0.563417559	0.5484422	5.47E-95	1.46E-90	--	-	-	-	-	-	-	-	-
PH2	ncbi_113806066	nudt21	0.749773759	0.505859334	0.567719069	1.59E-94	4.25E-90	nudt21	PREDICTED: cleavage and polyadenylation specificity factor subunit 5 [Stomoxys calcitrans]	Genetic Information Processing	Translation	ko03015//mRNA surveillance pathway	K14397	GO:0043234//protein complex	GO:0003824//catalytic activity	GO:0031124//mRNA 3'-end processing
PH2	ncbi_113816031	Hsp60A	0.45710528	0.286404066	0.67447451	2.89E-94	7.75E-90	Hsp60A	heat shock protein 60 [Penaeus monodon]	Human Diseases;Organismal Systems;Genetic Information Processing;Human Diseases;Human Diseases	Infectious diseases;Aging;Folding, sorting and degradation;Infectious diseases;Endocrine and metabolic diseases	ko05152//Tuberculosis;ko04212//Longevity regulating pathway - worm;ko03018//RNA degradation;ko05134//Legionellosis;ko04940//Type I diabetes mellitus	K04077;K04077;K04077;K04077;K04077	-	-	-
PH2	ncbi_113815566	ZMPSTE24	1.543206174	1.181078391	0.385826098	2.72E-93	7.29E-89	ZMPSTE24	PREDICTED: CAAX prenyl protease 1 homolog [Hyalella azteca]	Metabolism	Metabolism of terpenoids and polyketides	ko00900//Terpenoid backbone biosynthesis	K06013	-	-	GO:0006508//proteolysis;GO:0044267//cellular protein metabolic process
PH2	ncbi_113806395	ncbi_113806395	0.514900092	0.323106186	0.672284154	1.23E-92	3.28E-88	--	-	-	-	-	-	-	-	-
PH2	ncbi_113829397	ncbi_113829397	1.696800606	1.299208458	0.385184111	6.86E-92	1.84E-87	--	ATP synthase subunit e, mitochondrial [Daphnia magna]	Metabolism;Organismal Systems;Metabolism	Global and overview maps;Environmental adaptation;Energy metabolism	ko01100//Metabolic pathways;ko04714//Thermogenesis;ko00190//Oxidative phosphorylation	K02129;K02129;K02129	-	-	-
PH2	ncbi_113803626	MEAF6	0.632769703	0.420676796	0.588968281	8.22E-92	2.20E-87	MEAF6	PREDICTED: chromatin modification-related protein MEAF6-like [Limulus polyphemus]	-	-	-	-	-	-	-
PH2	ncbi_113811207	HRP65	0.661948348	0.451547227	0.551841763	9.25E-92	2.48E-87	HRP65	PREDICTED: protein no-on-transient A-like [Hyalella azteca]	-	-	-	-	-	-	-
PH2	ncbi_113805978	nop16	1.372573395	1.033637352	0.409153186	2.86E-91	7.66E-87	nop16	PREDICTED: nucleolar protein 16-like [Lingula anatina]	-	-	-	-	-	-	-
PH2	ncbi_113807219	PPIE	0.685060208	0.468242786	0.548974019	1.06E-90	2.84E-86	PPIE	PREDICTED: peptidyl-prolyl cis-trans isomerase E-like [Saccoglossus kowalevskii]	Genetic Information Processing	Transcription	ko03040//Spliceosome	K09564	-	GO:0003676//nucleic acid binding;GO:0016859//cis-trans isomerase activity	GO:0018208//peptidyl-proline modification
PH2	ncbi_113806953	lig	1.042478783	0.778304915	0.421610648	2.54E-90	6.80E-86	lig	PREDICTED: protein lingerer-like isoform X2 [Hyalella azteca]	-	-	-	-	-	-	-
PH2	ncbi_113817898	FKBP4	1.093124389	0.825942424	0.404344458	3.21E-90	8.59E-86	FKBP4	FK506-binding protein 4 [Zootermopsis nevadensis]	Organismal Systems	Endocrine system	ko04915//Estrogen signaling pathway	K09571	GO:0043227//membrane-bounded organelle;GO:0044424//intracellular part	GO:0005515//protein binding;GO:0097159//organic cyclic compound binding;GO:1901363//heterocyclic compound binding	GO:0003006//developmental process involved in reproduction;GO:0007275//multicellular organism development;GO:0009987//cellular process
PH2	ncbi_113815336	ncbi_113815336	0.995640934	0.729240941	0.449229987	3.42E-90	9.16E-86	--	PREDICTED: LOW QUALITY PROTEIN: titin-like [Megachile rotundata]	-	-	-	-	-	-	-
PH2	ncbi_113803801	MMADHC	1.074678457	0.78878202	0.446206501	7.73E-90	2.07E-85	MMADHC	Methylmalonic aciduria and homocystinuria type D [Daphnia magna]	-	-	-	-	-	-	-
PH2	ncbi_113807004	Snrpd2	1.045655242	0.761919131	0.456697481	8.79E-90	2.35E-85	Snrpd2	PREDICTED: probable small nuclear ribonucleoprotein Sm D2 [Hyalella azteca]	Genetic Information Processing	Transcription	ko03040//Spliceosome	K11096	GO:0030529//intracellular ribonucleoprotein complex	-	-
PH2	ncbi_113823162	ncbi_113823162	1.661443993	1.290665642	0.364322354	9.09E-90	2.43E-85	--	AGAP007297-PA-like protein [Anopheles sinensis]	-	-	-	-	-	-	-
PH2	ncbi_113814757	Ddx17	1.179984428	0.872654348	0.435285589	1.12E-89	3.00E-85	Ddx17	DEAD-box RNA helicase variant 1 [Litopenaeus vannamei]	Human Diseases;Human Diseases;Genetic Information Processing	Cancers;Cancers;Transcription	ko05205//Proteoglycans in cancer;ko05202//Transcriptional misregulation in cancers;ko03040//Spliceosome	K12823;K12823;K12823	-	GO:0017111//nucleoside-triphosphatase activity;GO:0032550//purine ribonucleoside binding	-
PH2	ncbi_113802527	Ino80c	1.13977389	0.839324742	0.441446634	2.00E-89	5.34E-85	Ino80c	PREDICTED: INO80 complex subunit C-like [Hyalella azteca]	-	-	-	-	-	-	-
PH2	ncbi_113818962	SUPT4H1	0.784378874	0.549114904	0.51444261	7.73E-89	2.07E-84	SUPT4H1	PREDICTED: transcription elongation factor SPT4-like [Hyalella azteca]	-	-	-	-	-	GO:0046914//transition metal ion binding	GO:0032784//regulation of DNA-templated transcription, elongation
PH2	ncbi_113820661	Sxl	0.515756294	0.341796754	0.593550826	3.15E-88	8.44E-84	Sxl	Sex-lethal [Eriocheir sinensis]	-	-	-	-	-	-	-
PH2	ncbi_113813350	thoc7	0.561356211	0.378243316	0.569601943	1.37E-87	3.67E-83	thoc7	PREDICTED: THO complex subunit 7 homolog [Hyalella azteca]	Genetic Information Processing	Translation	ko03013//RNA transport	K13176	-	-	-
PH2	ncbi_113805226	ncbi_113805226	0.562823264	0.365112662	0.624340262	1.51E-87	4.04E-83	--	PREDICTED: NF-kappa-B-repressing factor [Orussus abietinus]	-	-	-	-	-	-	-
PH2	ncbi_113810471	ncbi_113810471	0.668432318	0.494183197	0.435735531	2.16E-86	5.79E-82	--	-	-	-	-	-	-	-	-
PH2	ncbi_113827620	TBCC	1.125001122	0.855042828	0.395857851	3.27E-86	8.75E-82	TBCC	PREDICTED: tubulin-specific chaperone C-like [Hyalella azteca]	-	-	-	-	-	-	-
PH2	ncbi_113817819	UBE2F	0.541916296	0.365262851	0.569135001	9.49E-86	2.54E-81	UBE2F	PREDICTED: NEDD8-conjugating enzyme UBE2F-like [Hyalella azteca]	Genetic Information Processing	Folding, sorting and degradation	ko04120//Ubiquitin mediated proteolysis	K10687	-	-	-
PH2	ncbi_113810149	SLC25A22	0.445039108	0.286825976	0.633756432	9.80E-86	2.62E-81	SLC25A22	PREDICTED: mitochondrial glutamate carrier 1-like [Hyalella azteca]	-	-	-	-	-	-	-
PH2	ncbi_113819827	PBRM1	0.460068542	0.299662708	0.618509258	1.22E-85	3.27E-81	PBRM1	PREDICTED: protein polybromo-1-like [Hyalella azteca]	Human Diseases	Cancers	ko05225//Hepatocellular carcinoma	K11757	-	-	-
PH2	ncbi_113822764	PPIL1	0.77419758	0.54409614	0.508840204	1.41E-85	3.78E-81	PPIL1	PREDICTED: peptidyl-prolyl cis-trans isomerase-like 1 [Hyalella azteca]	Genetic Information Processing	Transcription	ko03040//Spliceosome	K12733	-	-	-
PH2	ncbi_113827253	ncbi_113827253	0.559702631	0.34923104	0.680478737	1.15E-84	3.08E-80	--	-	-	-	-	-	-	-	-
PH2	ncbi_113818047	dnajc5	1.280383386	0.965041071	0.407913614	1.55E-84	4.15E-80	dnajc5	Cysteine string protein [Zootermopsis nevadensis]	Genetic Information Processing	Folding, sorting and degradation	ko04141//Protein processing in endoplasmic reticulum	K09525	-	-	-
PH2	ncbi_113804244	Ik	0.700687945	0.487111544	0.524519903	3.50E-84	9.37E-80	Ik	PREDICTED: protein Red-like [Hyalella azteca]	-	-	-	-	GO:0031981//nuclear lumen;GO:0043232//intracellular non-membrane-bounded organelle;GO:0044421//extracellular region part	GO:0005515//protein binding	GO:0002376//immune system process;GO:0007154//cell communication
PH2	ncbi_113826154	MED18	0.521639268	0.342016089	0.608988285	5.82E-84	1.56E-79	MED18	PREDICTED: mediator of RNA polymerase II transcription subunit 18-like [Hyalella azteca]	-	-	-	-	-	-	-
PH2	ncbi_113822475	ncbi_113822475	1.152928492	0.839261091	0.458111432	8.21E-84	2.20E-79	--	-	-	-	-	-	-	-	-
PH2	ncbi_113809385	Surf4	1.612940194	1.157419046	0.478781657	9.48E-84	2.54E-79	Surf4	PREDICTED: surfeit locus protein 4-like [Hyalella azteca]	-	-	-	-	-	-	-
PH2	ncbi_113802493	MED8	0.683557684	0.480321325	0.509063226	2.72E-83	7.28E-79	MED8	PREDICTED: mediator of RNA polymerase II transcription subunit 8-like [Hyalella azteca]	Human Diseases	Infectious diseases	ko05168//Herpes simplex infection	K15129	-	-	-
PH2	ncbi_113825965	Cox16	0.478985713	0.315871069	0.600646821	3.31E-83	8.88E-79	Cox16	PREDICTED: cytochrome c oxidase assembly protein COX16 homolog, mitochondrial [Tribolium castaneum]	Organismal Systems	Environmental adaptation	ko04714//Thermogenesis	K18182	-	-	-
PH2	ncbi_113826520	EMC6	0.691324758	0.462512203	0.579872162	3.35E-83	8.98E-79	EMC6	PREDICTED: ER membrane protein complex subunit 6-like [Hyalella azteca]	-	-	-	-	GO:0031224//intrinsic component of membrane;GO:0043234//protein complex	-	-
PH2	ncbi_113803186	nip7	0.540273239	0.371760612	0.539315298	3.49E-83	9.35E-79	nip7	PREDICTED: 60S ribosome subunit biogenesis protein NIP7 homolog [Hydra vulgaris]	-	-	-	-	GO:0043231//intracellular membrane-bounded organelle	GO:0003723//RNA binding	GO:0022618//ribonucleoprotein complex assembly
PH2	ncbi_113821439	FTH	0.760429487	0.533685944	0.510823462	4.64E-83	1.24E-78	FTH	ferritin [Marsupenaeus japonicus]	Cellular Processes;Organismal Systems;Cellular Processes	Cell growth and death;Digestive system;Cell growth and death	ko04217//Necroptosis;ko04978//Mineral absorption;ko04216//Ferroptosis	K00522;K00522;K00522	-	-	-
PH2	ncbi_113816534	Drg2	0.973184673	0.737174448	0.400707535	6.09E-83	1.63E-78	Drg2	Developmentally-regulated GTP-binding protein 2 [Zootermopsis nevadensis]	-	-	-	-	-	GO:0032550//purine ribonucleoside binding	-
PH2	ncbi_113802461	Sf3a2	0.564808479	0.381584365	0.565759689	2.15E-82	5.76E-78	Sf3a2	PREDICTED: splicing factor 3A subunit 2-like [Hyalella azteca]	Genetic Information Processing	Transcription	ko03040//Spliceosome	K12826	GO:0005681//spliceosomal complex	GO:0003723//RNA binding;GO:0046914//transition metal ion binding	-
PH2	ncbi_113819339	HEBP2	1.057018742	0.819690284	0.366850156	6.42E-82	1.72E-77	HEBP2	PREDICTED: heme-binding protein 2-like isoform X2 [Hyalella azteca]	-	-	-	-	-	-	-
PH2	ncbi_113824672	Commd8	0.489500008	0.30422378	0.686175956	7.59E-82	2.03E-77	Commd8	PREDICTED: COMM domain-containing protein 8-like [Echinops telfairi]	-	-	-	-	-	-	-
PH2	ncbi_113804927	Cbp20	1.097285308	0.821310567	0.417938928	1.20E-81	3.23E-77	Cbp20	PREDICTED: nuclear cap-binding protein subunit 2-like [Dendroctonus ponderosae]	Genetic Information Processing;Genetic Information Processing;Genetic Information Processing	Translation;Transcription;Translation	ko03013//RNA transport;ko03040//Spliceosome;ko03015//mRNA surveillance pathway	K12883;K12883;K12883	-	-	-
PH2	ncbi_113814392	TfIIFbeta	0.684498222	0.4642686	0.560087083	1.39E-81	3.73E-77	TfIIFbeta	PREDICTED: general transcription factor IIF subunit 2 [Nicrophorus vespilloides]	Genetic Information Processing	Transcription	ko03022//Basal transcription factors	K03139	-	-	-
PH2	ncbi_113809592	ilf2	0.939320102	0.709485271	0.404844149	2.41E-81	6.45E-77	ilf2	interleukin enhancer binding factor [Eriocheir sinensis]	-	-	-	-	-	GO:0003824//catalytic activity;GO:0032550//purine ribonucleoside binding	GO:0002376//immune system process
PH2	ncbi_113830594	Pdpk1	0.769564105	0.520610216	0.563837886	4.12E-81	1.10E-76	Pdpk1	3-phosphoinositide-dependent protein kinase 1 [Zootermopsis nevadensis]	Cellular Processes;Human Diseases;Environmental Information Processing;Organismal Systems;Cellular Processes;Human Diseases;Environmental Information Processing;Cellular Processes;Environmental Information Processing;Organismal Systems;Environmental Information Processing;Environmental Information Processing;Human Diseases;Human Diseases;Human Diseases;Organismal Systems;Human Diseases;Organismal…	Cellular community - eukaryotes;Cancers;Signal transduction;Endocrine system;Cell growth and death;Cancers;Signal transduction;Transport and catabolism;Signal transduction;Endocrine system;Signal transduction;Signal transduction;Drug resistance;Cancers;Infectious diseases;Nervous system;Endocrine and metabolic diseases;Endocrine system;Infectious diseases;Cancers;Cancers;Immune system;Excretory s…	ko04510//Focal adhesion;ko05205//Proteoglycans in cancer;ko04151//PI3K-Akt signaling pathway;ko04919//Thyroid hormone signaling pathway;ko04210//Apoptosis;ko05231//Choline metabolism in cancer;ko04150//mTOR signaling pathway;ko04140//Autophagy - animal;ko04071//Sphingolipid signaling pathway;ko04910//Insulin signaling pathway;ko04068//FoxO signaling pathway;ko04152//AMPK signaling pathway;ko01524…	K06276;K06276;K06276;K06276;K06276;K06276;K06276;K06276;K06276;K06276;K06276;K06276;K06276;K06276;K06276;K06276;K06276;K06276;K06276;K06276;K06276;K06276;K06276;K06276	-	-	-
PH2	ncbi_113822931	ncbi_113822931	0.5976018	0.411169891	0.539449869	8.01E-81	2.15E-76	--	-	-	-	-	-	-	-	-
PH2	ncbi_113818950	GDPD1	0.959735233	0.733338297	0.388157575	4.38E-80	1.17E-75	GDPD1	PREDICTED: LOW QUALITY PROTEIN: glycerophosphodiester phosphodiesterase domain-containing protein 1-like [Apis mellifera]	Metabolism	Lipid metabolism	ko00565//Ether lipid metabolism	K22387	-	GO:0008081//phosphoric diester hydrolase activity	-
PH2	ncbi_113805598	TMEM68	0.421298243	0.259103816	0.701311634	5.30E-80	1.42E-75	TMEM68	AAEL012417-PA [Aedes aegypti]	-	-	-	-	-	-	-
PH2	ncbi_113812500	MRPS28	0.779051337	0.567646023	0.456726836	5.45E-80	1.46E-75	MRPS28	AAEL003730-PA [Aedes aegypti]	-	-	-	-	-	-	-
PH2	ncbi_113822803	ABHD16A	0.519096891	0.361141218	0.523440758	8.16E-80	2.19E-75	ABHD16A	PREDICTED: protein ABHD16A-like [Parasteatoda tepidariorum]	-	-	-	-	-	-	-
PH2	ncbi_113803790	PREB	0.625634662	0.437818886	0.514986257	1.46E-79	3.90E-75	PREB	PREDICTED: prolactin regulatory element-binding protein-like [Hyalella azteca]	Genetic Information Processing	Folding, sorting and degradation	ko04141//Protein processing in endoplasmic reticulum	K14003	-	-	-
PH2	ncbi_113802689	Hirip3	1.179495724	0.920151186	0.35822736	1.56E-79	4.17E-75	Hirip3	PREDICTED: protein starmaker-like [Parasteatoda tepidariorum]	-	-	-	-	-	-	-
PH2	ncbi_113827755	ncbi_113827755	0.768679691	0.551861716	0.478075748	2.21E-79	5.92E-75	--	-	-	-	-	-	-	-	-
PH2	ncbi_113811895	MED10	1.209606477	0.926969979	0.383943248	2.75E-79	7.36E-75	MED10	PREDICTED: mediator of RNA polymerase II transcription subunit 10-like [Hyalella azteca]	-	-	-	-	GO:0043234//protein complex	-	GO:0006355//regulation of transcription, DNA-templated
PH2	ncbi_113814578	SF3B4	0.974014714	0.739980474	0.396456364	3.58E-79	9.58E-75	SF3B4	PREDICTED: splicing factor 3B subunit 4-like [Priapulus caudatus]	Genetic Information Processing	Transcription	ko03040//Spliceosome	K12831	-	GO:0097159//organic cyclic compound binding	-
PH2	ncbi_113818060	chrb	0.817134141	0.583034103	0.486992658	6.12E-79	1.64E-74	chrb	PREDICTED: protein scylla-like [Hyalella azteca]	-	-	-	-	-	-	-
PH2	ncbi_113812629	TAF9	0.945865151	0.701799399	0.430575806	1.17E-78	3.13E-74	TAF9	PREDICTED: transcription initiation factor TFIID subunit 9 [Cephus cinctus]	Human Diseases;Genetic Information Processing	Infectious diseases;Transcription	ko05168//Herpes simplex infection;ko03022//Basal transcription factors	K03133;K03133	-	-	-
PH2	ncbi_113820495	Tim9a	0.619434735	0.42121278	0.556403074	1.55E-78	4.15E-74	Tim9a	PREDICTED: mitochondrial import inner membrane translocase subunit Tim9 [Tribolium castaneum]	-	-	-	-	-	-	GO:0051234//establishment of localization
PH2	ncbi_113828351	Cdk11b	0.635024538	0.441892587	0.523116611	2.87E-78	7.68E-74	Cdk11b	PREDICTED: cyclin-dependent kinase 11B-like isoform X1 [Hyalella azteca]	-	-	-	-	-	GO:0004672//protein kinase activity;GO:0032550//purine ribonucleoside binding	GO:0006464//cellular protein modification process;GO:0007166//cell surface receptor signaling pathway
PH2	ncbi_113812991	Trnau1ap	0.555242525	0.386980742	0.52085629	1.53E-77	4.09E-73	Trnau1ap	PREDICTED: tRNA selenocysteine 1-associated protein 1-like [Hyalella azteca]	-	-	-	-	-	-	-
PH2	ncbi_113829391	dctn2	1.125650251	0.868358364	0.374396181	2.89E-77	7.74E-73	dctn2	PREDICTED: dynactin subunit 2-like [Hyalella azteca]	Human Diseases;Organismal Systems	Neurodegenerative diseases;Excretory system	ko05016//Huntington disease;ko04962//Vasopressin-regulated water reabsorption	K10424;K10424	-	-	-
PH2	ncbi_113803185	Vcp	0.607337034	0.425983878	0.511698514	5.68E-77	1.52E-72	Vcp	valosin-containing protein [Penaeus monodon]	Genetic Information Processing;Human Diseases	Folding, sorting and degradation;Infectious diseases	ko04141//Protein processing in endoplasmic reticulum;ko05134//Legionellosis	K13525;K13525	-	GO:0003824//catalytic activity;GO:0032550//purine ribonucleoside binding	-
PH2	ncbi_113819145	TMEM59	1.109548556	0.83131796	0.41650052	5.76E-77	1.54E-72	TMEM59	PREDICTED: transmembrane protein 59-like [Branchiostoma belcheri]	-	-	-	-	-	-	-
PH2	ncbi_113819725	TXNL1	0.562726477	0.38731873	0.538912577	7.86E-77	2.10E-72	TXNL1	PREDICTED: thioredoxin-like protein 1 [Hyalella azteca]	-	-	-	-	-	-	-
PH2	ncbi_113820745	NOP2	1.245835878	0.944241868	0.399885666	1.47E-76	3.95E-72	NOP2	PREDICTED: probable 28S rRNA (cytosine-C(5))-methyltransferase [Limulus polyphemus]	-	-	-	-	-	-	-
PH2	ncbi_113814021	Chmp6	0.847717319	0.622938357	0.444493853	1.83E-76	4.91E-72	Chmp6	PREDICTED: charged multivesicular body protein 6 [Ceratina calcarata]	Cellular Processes;Cellular Processes	Transport and catabolism;Cell growth and death	ko04144//Endocytosis;ko04217//Necroptosis	K12195;K12195	-	-	-
PH2	ncbi_113823908	Sar1b	0.636123506	0.43187179	0.558703817	1.92E-76	5.14E-72	Sar1b	PREDICTED: GTP-binding protein SAR1a-like [Hyalella azteca]	Genetic Information Processing;Human Diseases	Folding, sorting and degradation;Infectious diseases	ko04141//Protein processing in endoplasmic reticulum;ko05134//Legionellosis	K07953;K07953	GO:0043231//intracellular membrane-bounded organelle	GO:0032550//purine ribonucleoside binding	GO:0015031//protein transport
PH2	ncbi_113802401	Dnajc8	0.538478499	0.355675439	0.598327384	4.22E-76	1.13E-71	Dnajc8	DnaJ-like protein subfamily C member 8 [Zootermopsis nevadensis]	-	-	-	-	-	-	-
PH2	ncbi_113808397	ncbi_113808397	1.036837645	0.793959199	0.385053229	7.77E-76	2.08E-71	--	PREDICTED: polyadenylate-binding protein-interacting protein 1-like isoform X2 [Parasteatoda tepidariorum]	Genetic Information Processing	Translation	ko03013//RNA transport	K14322	-	-	-
PH2	ncbi_113821075	C16C10.2	0.534754244	0.365972256	0.547141743	8.93E-76	2.39E-71	C16C10.2	PREDICTED: probable U3 small nucleolar RNA-associated protein 11 [Microplitis demolitor]	-	-	-	-	-	-	-
PH2	ncbi_113824055	YEATS4	0.432865368	0.295079606	0.552814168	1.14E-75	3.06E-71	YEATS4	PREDICTED: YEATS domain-containing protein 4-like [Limulus polyphemus]	-	-	-	-	-	-	-
PH2	ncbi_113828572	GA10892	0.406565846	0.247163071	0.718025821	1.51E-75	4.03E-71	GA10892	PREDICTED: mannose-1-phosphate guanyltransferase beta-like [Plutella xylostella]	Metabolism;Metabolism;Metabolism	Global and overview maps;Carbohydrate metabolism;Carbohydrate metabolism	ko01100//Metabolic pathways;ko00520//Amino sugar and nucleotide sugar metabolism;ko00051//Fructose and mannose metabolism	K00966;K00966;K00966	-	GO:0016772//transferase activity, transferring phosphorus-containing groups	-
PH2	ncbi_113820074	Txndc12	0.547570342	0.363314183	0.591826621	4.04E-75	1.08E-70	Txndc12	PREDICTED: thioredoxin domain-containing protein 12 [Strongylocentrotus purpuratus]	Metabolism	Metabolism of other amino acids	ko00480//Glutathione metabolism	K05360	-	-	-
PH2	ncbi_113809669	Spt5	0.566573333	0.381461268	0.570726123	7.94E-75	2.12E-70	Spt5	PREDICTED: transcription elongation factor SPT5-like [Hyalella azteca]	-	-	-	-	-	-	GO:0006355//regulation of transcription, DNA-templated
PH2	ncbi_113805928	Mrpl14	0.753978232	0.55159132	0.450923117	9.60E-75	2.57E-70	Mrpl14	mitochondrial ribosomal protein L14 [Anopheles darlingi]	Genetic Information Processing	Translation	ko03010//Ribosome	K02874	GO:0000315//organellar large ribosomal subunit	GO:0005198//structural molecule activity	GO:0010467//gene expression
PH2	ncbi_113803774	Vars	0.902681603	0.647672597	0.4789525	1.65E-74	4.41E-70	Vars	PREDICTED: valine--tRNA ligase isoform X1 [Neodiprion lecontei]	Genetic Information Processing	Translation	ko00970//Aminoacyl-tRNA biosynthesis	K01873	-	GO:0004812//aminoacyl-tRNA ligase activity	GO:0006418//tRNA aminoacylation for protein translation
PH2	ncbi_113800712	TfIIS	0.438534104	0.297402706	0.56027127	2.00E-74	5.35E-70	TfIIS	PREDICTED: transcription elongation factor S-II-like [Hyalella azteca]	-	-	-	-	-	-	GO:0006355//regulation of transcription, DNA-templated
PH2	ncbi_113819738	Otub1	0.596751899	0.399930369	0.577382415	3.63E-74	9.71E-70	Otub1	OTU domain ubiquitin aldehyde binding protein [Scylla paramamosain]	-	-	-	-	-	-	-
PH2	ncbi_113802184	Lsm8	0.538308606	0.362298101	0.571256246	6.51E-74	1.74E-69	Lsm8	PREDICTED: U6 snRNA-associated Sm-like protein LSm8 [Hyalella azteca]	Genetic Information Processing;Genetic Information Processing	Transcription;Folding, sorting and degradation	ko03040//Spliceosome;ko03018//RNA degradation	K12627;K12627	GO:0032991//macromolecular complex	-	-
PH2	ncbi_113828348	TIMM29	0.50057724	0.341651308	0.551068048	8.05E-74	2.16E-69	TIMM29	hypothetical protein L798_09641 [Zootermopsis nevadensis]	-	-	-	-	-	-	-
PH2	ncbi_113830393	ncbi_113830393	0.438375474	0.295703058	0.568017924	2.19E-73	5.87E-69	--	PREDICTED: UPF0449 protein C19orf25 homolog [Pygocentrus nattereri]	-	-	-	-	-	-	-
PH2	ncbi_113806783	ncbi_113806783	0.796094009	0.566680164	0.490404101	2.24E-73	5.99E-69	--	-	-	-	-	-	-	-	-
PH2	ncbi_113828240	uba3	0.768602997	0.562745992	0.449754726	4.70E-73	1.26E-68	uba3	PREDICTED: NEDD8-activating enzyme E1 catalytic subunit isoform X3 [Scleropages formosus]	Genetic Information Processing	Folding, sorting and degradation	ko04120//Ubiquitin mediated proteolysis	K10686	-	-	-
PH2	ncbi_113802226	Hspbp1	0.651183336	0.416712364	0.644011874	1.94E-72	5.18E-68	Hspbp1	PREDICTED: hsp70-binding protein 1-like isoform X2 [Limulus polyphemus]	Genetic Information Processing	Folding, sorting and degradation	ko04141//Protein processing in endoplasmic reticulum	K09562	-	-	-
PH2	ncbi_113824991	paxip1	0.495284382	0.36864638	0.426019538	2.11E-72	5.64E-68	paxip1	PREDICTED: PAX-interacting protein 1 [Nasonia vitripennis]	-	-	-	-	-	-	-
PH2	ncbi_113822287	Luc7l3	0.712656859	0.520927355	0.452125394	3.05E-72	8.16E-68	Luc7l3	PREDICTED: luc7-like protein 3 isoform X2 [Hyalella azteca]	-	-	-	-	-	-	-
PH2	ncbi_113803554	ncbi_113803554	0.417585603	0.305929735	0.448871634	5.04E-72	1.35E-67	--	-	-	-	-	-	-	-	-
PH2	ncbi_113803241	glrx3	0.787900799	0.596452313	0.4016072	1.00E-71	2.68E-67	glrx3	PREDICTED: glutaredoxin-3-like [Hyalella azteca]	-	-	-	-	GO:0031674//I band;GO:0031988//membrane-bounded vesicle	GO:0003723//RNA binding;GO:0015036//disulfide oxidoreductase activity	GO:0010611//regulation of cardiac muscle hypertrophy;GO:0019725//cellular homeostasis;GO:0044710//single-organism metabolic process
PH2	ncbi_113828396	SLC25A11	0.481393761	0.309221117	0.638578596	1.87E-71	5.02E-67	SLC25A11	PREDICTED: mitochondrial 2-oxoglutarate/malate carrier protein-like [Hyalella azteca]	-	-	-	-	GO:0019866//organelle inner membrane;GO:0031224//intrinsic component of membrane;GO:0043231//intracellular membrane-bounded organelle	GO:0003723//RNA binding	GO:1902582//single-organism intracellular transport
PH2	ncbi_113819953	Bap60	0.520495663	0.356132091	0.547473699	2.35E-71	6.30E-67	Bap60	Bap60 [Marsupenaeus japonicus]	Organismal Systems;Human Diseases	Environmental adaptation;Cancers	ko04714//Thermogenesis;ko05225//Hepatocellular carcinoma	K11650;K11650	-	-	-
PH2	ncbi_113801000	Ap1m1	1.059307693	0.816254581	0.376030617	2.42E-71	6.48E-67	Ap1m1	PREDICTED: AP-1 complex subunit mu-1 [Nicrophorus vespilloides]	Cellular Processes	Transport and catabolism	ko04142//Lysosome	K12393	GO:0030119//AP-type membrane coat adaptor complex	-	GO:0015031//protein transport
PH2	ncbi_113815925	Eif4ebp1	0.779613153	0.608883887	0.356591294	4.31E-71	1.15E-66	Eif4ebp1	eukaryotic initiation factor 4E binding protein [Marsupenaeus japonicus]	Genetic Information Processing;Organismal Systems	Translation;Aging	ko03013//RNA transport;ko04213//Longevity regulating pathway - multiple species	K18644;K18644	-	-	-
PH2	ncbi_113828513	Nif3l1	0.679252698	0.482471663	0.493504181	4.57E-71	1.22E-66	Nif3l1	PREDICTED: NIF3-like protein 1 [Larimichthys crocea]	-	-	-	-	-	-	-
PH2	ncbi_113812019	ATG12	0.750233065	0.566957432	0.404098429	1.42E-70	3.80E-66	ATG12	autophagy related protein Atg12-like protein [Danaus plexippus]	Cellular Processes;Environmental Information Processing;Organismal Systems;Cellular Processes;Organismal Systems	Transport and catabolism;Signal transduction;Immune system;Transport and catabolism;Immune system	ko04140//Autophagy - animal;ko04068//FoxO signaling pathway;ko04621//NOD-like receptor signaling pathway;ko04136//Autophagy - other eukaryotes;ko04622//RIG-I-like receptor signaling pathway	K08336;K08336;K08336;K08336;K08336	GO:0044424//intracellular part	-	GO:0044248//cellular catabolic process
PH2	ncbi_113822077	Polr2c	1.066667663	0.813686565	0.390565676	1.48E-70	3.95E-66	Polr2c	PREDICTED: DNA-directed RNA polymerase II subunit RPB3-like [Hyalella azteca]	Metabolism;Human Diseases;Metabolism;Human Diseases;Metabolism;Genetic Information Processing	Global and overview maps;Neurodegenerative diseases;Nucleotide metabolism;Infectious diseases;Nucleotide metabolism;Transcription	ko01100//Metabolic pathways;ko05016//Huntington disease;ko00230//Purine metabolism;ko05169//Epstein-Barr virus infection;ko00240//Pyrimidine metabolism;ko03020//RNA polymerase	K03011;K03011;K03011;K03011;K03011;K03011	-	GO:0005515//protein binding	GO:0034645//cellular macromolecule biosynthetic process
PH2	ncbi_113821250	ncbi_113821250	1.156426727	0.879741494	0.394522293	2.66E-70	7.13E-66	--	PREDICTED: trace amine-associated receptor 7d-like [Takifugu rubripes]	-	-	-	-	-	-	-
PH2	ncbi_113826878	ncbi_113826878	1.122086181	0.858125722	0.386922551	4.66E-70	1.25E-65	--	PREDICTED: kinectin isoform X1 [Microplitis demolitor]	-	-	-	-	-	-	-
PH2	ncbi_113824109	ncbi_113824109	0.521162462	0.339876502	0.616722551	5.44E-70	1.46E-65	--	-	-	-	-	-	-	-	-
PH2	ncbi_113804953	MED30	0.933594922	0.715974652	0.382888201	7.92E-70	2.12E-65	MED30	PREDICTED: mediator of RNA polymerase II transcription subunit 30-like [Hyalella azteca]	Organismal Systems	Endocrine system	ko04919//Thyroid hormone signaling pathway	K15143	-	-	-
PH2	ncbi_113805683	FEZ2	0.942108599	0.728935256	0.370102692	1.20E-69	3.21E-65	FEZ2	PREDICTED: fasciculation and elongation protein zeta-2-like [Hyalella azteca]	-	-	-	-	-	-	-
PH2	ncbi_113804464	naa20	1.021362101	0.797577939	0.356797022	3.63E-69	9.72E-65	naa20	N-alpha-acetyltransferase 20, partial [Stegodyphus mimosarum]	-	-	-	-	-	-	-
PH2	ncbi_113804185	mRpL23	0.783420826	0.600459443	0.383720675	3.94E-69	1.05E-64	mRpL23	AAEL005150-PA [Aedes aegypti]	Genetic Information Processing	Translation	ko03010//Ribosome	K02892	GO:0000315//organellar large ribosomal subunit	GO:0005198//structural molecule activity	-
PH2	ncbi_113823507	Vkorc1l1	0.598022927	0.422539822	0.501113482	2.05E-68	5.50E-64	Vkorc1l1	vitamin K epoxide reductase complex subunit 1 precursor [Ixodes scapularis]	Metabolism	Metabolism of cofactors and vitamins	ko00130//Ubiquinone and other terpenoid-quinone biosynthesis	K05357	-	-	-
PH2	ncbi_113822473	ncbi_113822473	1.11418341	0.833404168	0.418898519	5.12E-68	1.37E-63	--	-	-	-	-	-	-	-	-
PH2	ncbi_113814551	AP1S2	1.057447947	0.817057052	0.372077924	1.03E-67	2.75E-63	AP1S2	clathrin coat assembly protein ap19 [Scylla paramamosain]	Cellular Processes	Transport and catabolism	ko04142//Lysosome	K12394	-	-	-
PH2	ncbi_113824618	SMU1	0.468994464	0.327300757	0.518953952	2.16E-67	5.77E-63	SMU1	SMU1 [Macrobrachium rosenbergii]	-	-	-	-	GO:0044424//intracellular part	-	-
PH2	ncbi_113807989	Dnajb2	0.508390413	0.351223381	0.533547936	2.19E-67	5.85E-63	Dnajb2	PREDICTED: dnaJ homolog subfamily B member 6 isoform X2 [Agrilus planipennis]	-	-	-	-	-	-	-
PH2	ncbi_113817009	ncbi_113817009	0.49653128	0.350098817	0.504122418	3.31E-67	8.85E-63	--	PREDICTED: aprataxin and PNK-like factor [Hyalella azteca]	-	-	-	-	GO:0043231//intracellular membrane-bounded organelle;GO:0044427//chromosomal part	GO:0004520//endodeoxyribonuclease activity;GO:0004527//exonuclease activity;GO:0036094//small molecule binding	GO:0006281//DNA repair;GO:0006308//DNA catabolic process;GO:0051054//positive regulation of DNA metabolic process
PH2	ncbi_113823857	Lrrc47	0.603341561	0.430592323	0.486652365	8.21E-67	2.20E-62	Lrrc47	PREDICTED: leucine-rich repeat-containing protein 47-like [Neodiprion lecontei]	-	-	-	-	-	-	-
PH2	ncbi_113803698	PSMD9	0.414512074	0.280851915	0.561604487	9.16E-67	2.45E-62	PSMD9	PREDICTED: 26S proteasome non-ATPase regulatory subunit 9 [Neodiprion lecontei]	-	-	-	-	-	-	-
PH2	ncbi_113826785	ncbi_113826785	0.502118177	0.354259885	0.503218845	3.52E-66	9.41E-62	--	PREDICTED: gastrula zinc finger protein XlCGF8.2DB-like, partial [Nothobranchius furzeri]	-	-	-	-	-	-	-
PH2	ncbi_113820489	Scaf8	0.487591755	0.341754721	0.512712463	3.57E-66	9.56E-62	Scaf8	PREDICTED: splicing factor, arginine/serine-rich 15-like isoform X1 [Hyalella azteca]	-	-	-	-	-	GO:0097159//organic cyclic compound binding	-
PH2	ncbi_113808636	ncbi_113808636	0.673487334	0.505847321	0.412948811	4.27E-66	1.14E-61	--	-	-	-	-	-	-	-	-
PH2	ncbi_113819729	hpo-8	0.406322565	0.26414593	0.621290305	5.96E-66	1.60E-61	hpo-8	PREDICTED: very-long-chain (3R)-3-hydroxyacyl-CoA dehydratase 1-like [Hyalella azteca]	Metabolism;Metabolism;Metabolism;Metabolism	Global and overview maps;Global and overview maps;Lipid metabolism;Lipid metabolism	ko01100//Metabolic pathways;ko01212//Fatty acid metabolism;ko00062//Fatty acid elongation;ko01040//Biosynthesis of unsaturated fatty acids	K10703;K10703;K10703;K10703	-	-	-
PH2	ncbi_113829295	UBE2G2	1.22639657	0.942661898	0.379613246	3.24E-65	8.68E-61	UBE2G2	ubiquitin-conjugating enzyme E2 G2 [Penaeus monodon]	Genetic Information Processing;Genetic Information Processing;Human Diseases	Folding, sorting and degradation;Folding, sorting and degradation;Neurodegenerative diseases	ko04141//Protein processing in endoplasmic reticulum;ko04120//Ubiquitin mediated proteolysis;ko05012//Parkinson disease	K04555;K04555;K04555	-	-	-
PH2	ncbi_113826196	ncbi_113826196	0.527190791	0.385284267	0.452401897	7.09E-65	1.90E-60	--	PREDICTED: nuclear nucleic acid-binding protein C1D-like [Hyalella azteca]	Genetic Information Processing	Folding, sorting and degradation	ko03018//RNA degradation	K12592	-	-	-
PH2	ncbi_113826142	copg2	0.878227876	0.676532096	0.376436949	1.13E-64	3.02E-60	copg2	PREDICTED: coatomer subunit gamma-2-like [Hyalella azteca]	-	-	-	-	GO:0030120//vesicle coat;GO:0030660//Golgi-associated vesicle membrane	-	GO:0015031//protein transport;GO:0048193//Golgi vesicle transport
PH2	ncbi_113822494	PRKAA2	0.767666283	0.569429839	0.430961188	1.54E-64	4.12E-60	PRKAA2	AMP-activated protein kinase subunit alpha [Litopenaeus vannamei]	Organismal Systems;Environmental Information Processing;Cellular Processes;Human Diseases;Organismal Systems;Human Diseases;Environmental Information Processing;Organismal Systems;Cellular Processes;Human Diseases;Organismal Systems;Environmental Information Processing;Environmental Information Processing;Human Diseases;Environmental Information Processing;Organismal Systems;Organismal Systems;Or…	Environmental adaptation;Signal transduction;Cellular community - eukaryotes;Cardiovascular diseases;Endocrine system;Cardiovascular diseases;Signal transduction;Aging;Transport and catabolism;Endocrine and metabolic diseases;Endocrine system;Signal transduction;Signal transduction;Endocrine and metabolic diseases;Signal transduction;Aging;Endocrine system;Endocrine system;Environmental adaptation	ko04714//Thermogenesis;ko04151//PI3K-Akt signaling pathway;ko04530//Tight junction;ko05410//Hypertrophic cardiomyopathy (HCM);ko04921//Oxytocin signaling pathway;ko05418//Fluid shear stress and atherosclerosis;ko04150//mTOR signaling pathway;ko04213//Longevity regulating pathway - multiple species;ko04140//Autophagy - animal;ko04932//Non-alcoholic fatty liver disease (NAFLD);ko04910//Insulin sign…	K07198;K07198;K07198;K07198;K07198;K07198;K07198;K07198;K07198;K07198;K07198;K07198;K07198;K07198;K07198;K07198;K07198;K07198;K07198	-	GO:0004674//protein serine/threonine kinase activity	-
PH2	ncbi_113810041	CG11007	0.904295075	0.682476911	0.406013367	4.88E-64	1.31E-59	CG11007	PREDICTED: thioredoxin-related transmembrane protein 2 homolog [Hyalella azteca]	-	-	-	-	-	-	-
PH2	ncbi_113811258	ccdc149	0.466030127	0.319013662	0.546805012	5.46E-64	1.46E-59	ccdc149	PREDICTED: coiled-coil domain-containing protein 149 isoform X1 [Trachymyrmex cornetzi]	-	-	-	-	-	-	-
PH2	ncbi_113822189	Pym	0.64880204	0.474881549	0.450210653	7.00E-64	1.88E-59	Pym	PREDICTED: partner of Y14 and mago-like [Parasteatoda tepidariorum]	Genetic Information Processing;Genetic Information Processing	Translation;Translation	ko03013//RNA transport;ko03015//mRNA surveillance pathway	K14294;K14294	-	-	-
PH2	ncbi_113814489	ncbi_113814489	0.447214499	0.312756865	0.51592541	9.63E-64	2.58E-59	--	Flavohemoprotein [Orchesella cincta]	-	-	-	-	-	-	-
PH2	ncbi_113818563	Gmd	0.412967094	0.278371341	0.56901614	2.99E-63	8.00E-59	Gmd	GDP-mannose 4,6 dehydratase [Orchesella cincta]	Metabolism;Metabolism;Metabolism	Global and overview maps;Carbohydrate metabolism;Carbohydrate metabolism	ko01100//Metabolic pathways;ko00520//Amino sugar and nucleotide sugar metabolism;ko00051//Fructose and mannose metabolism	K01711;K01711;K01711	-	GO:0016836//hydro-lyase activity;GO:0048037//cofactor binding	GO:0009225//nucleotide-sugar metabolic process
PH2	ncbi_113810944	COQ7	0.523824646	0.369427989	0.503790766	4.56E-63	1.22E-58	COQ7	PREDICTED: 5-demethoxyubiquinone hydroxylase, mitochondrial-like [Hyalella azteca]	Metabolism;Metabolism	Global and overview maps;Metabolism of cofactors and vitamins	ko01100//Metabolic pathways;ko00130//Ubiquinone and other terpenoid-quinone biosynthesis	K06134;K06134	-	-	GO:0044710//single-organism metabolic process
PH2	ncbi_113825445	Mrps23	0.434810507	0.305953896	0.507072531	5.63E-63	1.51E-58	Mrps23	PREDICTED: 28S ribosomal protein S23, mitochondrial-like isoform X1 [Priapulus caudatus]	-	-	-	-	GO:0005840//ribosome	-	GO:0006412//translation
PH2	ncbi_113809198	Gtf2h4	0.415706347	0.281611719	0.561857404	8.29E-63	2.22E-58	Gtf2h4	general transcription factor IIH subunit 4 [Penaeus monodon]	Human Diseases;Genetic Information Processing;Genetic Information Processing	Cancers;Replication and repair;Transcription	ko05203//Viral carcinogenesis;ko03420//Nucleotide excision repair;ko03022//Basal transcription factors	K03144;K03144;K03144	-	-	-
PH2	ncbi_113810556	CG6712	0.692769833	0.494260303	0.487105068	8.63E-63	2.31E-58	CG6712	PREDICTED: ribosome production factor 1-like [Limulus polyphemus]	-	-	-	-	-	-	-
PH2	ncbi_113800452	UBAC2	0.52213552	0.374049785	0.481194005	1.05E-62	2.80E-58	UBAC2	PREDICTED: ubiquitin-associated domain-containing protein 2-like [Hyalella azteca]	-	-	-	-	-	-	-
PH2	ncbi_113821415	Rbm17	0.588664069	0.439274162	0.422322929	1.17E-62	3.13E-58	Rbm17	PREDICTED: splicing factor 45 [Papilio xuthus]	Genetic Information Processing	Transcription	ko03040//Spliceosome	K12840	-	-	-
PH2	ncbi_113807484	DCTN6	0.886487118	0.670447227	0.402975888	1.23E-62	3.29E-58	DCTN6	PREDICTED: dynactin subunit 6-like [Hyalella azteca]	Organismal Systems	Excretory system	ko04962//Vasopressin-regulated water reabsorption	K10428	GO:0000776//kinetochore;GO:0015630//microtubule cytoskeleton;GO:0044430//cytoskeletal part	-	-
PH2	ncbi_113822976	Cdk2	0.681164609	0.521645884	0.384932707	1.86E-62	4.98E-58	Cdk2	cyclin-dependent kinase 2 [Penaeus monodon]	Human Diseases;Human Diseases;Environmental Information Processing;Human Diseases;Human Diseases;Human Diseases;Cellular Processes;Environmental Information Processing;Cellular Processes;Human Diseases;Human Diseases;Cellular Processes;Human Diseases;Human Diseases;Organismal Systems;Human Diseases;Human Diseases;Cellular Processes	Cancers;Infectious diseases;Signal transduction;Cancers;Infectious diseases;Endocrine and metabolic diseases;Cell growth and death;Signal transduction;Cell growth and death;Cancers;Infectious diseases;Cell growth and death;Cancers;Cancers;Endocrine system;Infectious diseases;Infectious diseases;Cell growth and death	ko05200//Pathways in cancer;ko05165//Human papillomavirus infection;ko04151//PI3K-Akt signaling pathway;ko05203//Viral carcinogenesis;ko05169//Epstein-Barr virus infection;ko04934//Cushing syndrome;ko04110//Cell cycle;ko04068//FoxO signaling pathway;ko04218//Cellular senescence;ko05226//Gastric cancer;ko05168//Herpes simplex infection;ko04114//Oocyte meiosis;ko05215//Prostate cancer;ko05222//Smal…	K02206;K02206;K02206;K02206;K02206;K02206;K02206;K02206;K02206;K02206;K02206;K02206;K02206;K02206;K02206;K02206;K02206;K02206	GO:0000803//sex chromosome;GO:0016604//nuclear body;GO:0043234//protein complex;GO:0044430//cytoskeletal part;GO:0044444//cytoplasmic part;GO:0098687//chromosomal region	GO:0004674//protein serine/threonine kinase activity;GO:0005515//protein binding;GO:0032550//purine ribonucleoside binding;GO:0043169//cation binding	GO:0000280//nuclear division;GO:0006355//regulation of transcription, DNA-templated;GO:0006468//protein phosphorylation;GO:0007264//small GTPase mediated signal transduction;GO:0009628//response to abiotic stimulus;GO:0010038//response to metal ion;GO:0016458//gene silencing;GO:0016570//histone modification;GO:0030001//metal ion transport;GO:0030174//regulation of DNA-dependent DNA replication in…
PH2	ncbi_113802334	ncbi_113802334	0.742829275	0.5694057	0.383573738	2.01E-62	5.37E-58	--	-	-	-	-	-	-	-	-
PH2	ncbi_113816902	mRpS16	0.689195732	0.513522517	0.424486231	2.33E-62	6.24E-58	mRpS16	28S ribosomal protein S16 [Culex quinquefasciatus]	Genetic Information Processing	Translation	ko03010//Ribosome	K02959	GO:0000314//organellar small ribosomal subunit	GO:0005198//structural molecule activity	GO:0010467//gene expression
PH2	ncbi_113812899	ncbi_113812899	0.413813949	0.293081814	0.497678828	2.51E-62	6.71E-58	--	AAEL000046-PA [Aedes aegypti]	-	-	-	-	-	-	-
PH2	ncbi_113817249	mRpL24	0.466746976	0.348032206	0.42341986	2.67E-62	7.16E-58	mRpL24	AGAP008405-PA-like protein [Anopheles sinensis]	Genetic Information Processing	Translation	ko03010//Ribosome	K02895	GO:0030529//intracellular ribonucleoprotein complex	-	-
PH2	ncbi_113811630	AAEL006251	0.993654695	0.740437347	0.424366923	3.97E-61	1.06E-56	AAEL006251	PREDICTED: ubiquitin-fold modifier 1 [Lingula anatina]	-	-	-	-	-	-	-
PH2	ncbi_113810269	THOC3	0.639519162	0.47713004	0.422605066	9.30E-61	2.49E-56	THOC3	PREDICTED: THO complex subunit 3-like [Hyalella azteca]	Genetic Information Processing;Genetic Information Processing	Translation;Transcription	ko03013//RNA transport;ko03040//Spliceosome	K12880;K12880	-	-	-
PH2	ncbi_113824315	7-Sep	0.493148231	0.35708537	0.465752331	9.44E-61	2.53E-56	7-Sep	PREDICTED: septin-7-like isoform X3 [Hyalella azteca]	-	-	-	-	-	GO:0032550//purine ribonucleoside binding	GO:0044763//single-organism cellular process
PH2	ncbi_113805258	FGFR1OP	0.548273368	0.406153612	0.432869924	1.17E-60	3.14E-56	FGFR1OP	PREDICTED: FGFR1 oncogene partner-like [Acropora digitifera]	-	-	-	-	-	-	-
PH2	ncbi_113806634	ncbi_113806634	0.640338172	0.48341418	0.405574224	1.28E-60	3.43E-56	--	Polyadenylate-binding protein, cytoplasmic and nuclear [Exaiptasia pallida]	-	-	-	-	-	-	-
PH2	ncbi_113808091	O-fut1	0.968207917	0.736067205	0.395479396	1.49E-60	3.98E-56	O-fut1	GDP-fucose protein O-fucosyltransferase 1 [Zootermopsis nevadensis]	Metabolism	Glycan biosynthesis and metabolism	ko00514//Other types of O-glycan biosynthesis	K03691	-	GO:0008417//fucosyltransferase activity	GO:0006493//protein O-linked glycosylation
PH2	ncbi_113818059	PRPF4B	0.7888738	0.605408901	0.381884637	1.95E-60	5.22E-56	PRPF4B	PREDICTED: serine/threonine-protein kinase PRP4 homolog [Hyalella azteca]	-	-	-	-	-	-	-
PH2	ncbi_113803693	ncbi_113803693	0.770373933	0.561518007	0.4562266	5.00E-60	1.34E-55	--	PREDICTED: tripartite motif-containing protein 65-like [Hyalella azteca]	-	-	-	-	-	-	GO:0002376//immune system process;GO:0048513//animal organ development;GO:0065007//biological regulation
PH2	ncbi_113803548	ken	0.695540649	0.533894426	0.381580344	9.94E-60	2.66E-55	ken	PREDICTED: transcription factor che-1-like [Bemisia tabaci]	Environmental Information Processing	Signal transduction	ko04013//MAPK signaling pathway - fly	K20210	-	-	-
PH2	ncbi_113826030	nonA	0.561804215	0.412100568	0.447070998	1.88E-59	5.05E-55	nonA	PREDICTED: protein no-on-transient A-like [Hyalella azteca]	-	-	-	-	-	-	-
PH2	ncbi_113812201	CPT2	0.428498724	0.309571967	0.469016071	5.01E-59	1.34E-54	CPT2	PREDICTED: carnitine O-palmitoyltransferase 2, mitochondrial-like [Hyalella azteca]	Organismal Systems;Organismal Systems;Metabolism;Metabolism	Environmental adaptation;Endocrine system;Lipid metabolism;Global and overview maps	ko04714//Thermogenesis;ko03320//PPAR signaling pathway;ko00071//Fatty acid degradation;ko01212//Fatty acid metabolism	K08766;K08766;K08766;K08766	-	-	-
PH2	ncbi_113820959	PPIL2	0.443029551	0.302007266	0.552819671	7.60E-59	2.03E-54	PPIL2	PREDICTED: peptidyl-prolyl cis-trans isomerase-like 2 [Hyalella azteca]	Genetic Information Processing	Folding, sorting and degradation	ko04120//Ubiquitin mediated proteolysis	K10598	-	-	-
PH2	ncbi_113802514	Ap3s1	0.641832343	0.472338903	0.442374126	7.81E-59	2.09E-54	Ap3s1	PREDICTED: AP-3 complex subunit sigma-2 isoform X1 [Apis mellifera]	Cellular Processes	Transport and catabolism	ko04142//Lysosome	K12399	GO:0030119//AP-type membrane coat adaptor complex	GO:0022892//substrate-specific transporter activity	GO:0015031//protein transport
PH2	ncbi_113808704	mrps-17	0.411084445	0.280192792	0.553014944	7.86E-59	2.11E-54	mrps-17	mitochondrial ribosomal protein S17 [Danaus plexippus]	Genetic Information Processing	Translation	ko03010//Ribosome	K02961	GO:0005622//intracellular	-	-
PH2	ncbi_113810293	TP53RK	0.713220835	0.54950068	0.376227581	1.30E-58	3.48E-54	TP53RK	PREDICTED: TP53-regulating kinase-like [Hyalella azteca]	-	-	-	-	GO:0043231//intracellular membrane-bounded organelle	GO:0004672//protein kinase activity;GO:0005515//protein binding	GO:0006464//cellular protein modification process
PH2	ncbi_113817185	CNDP2	0.749953327	0.583990921	0.360854873	1.44E-58	3.86E-54	CNDP2	PREDICTED: cytosolic non-specific dipeptidase-like isoform X2 [Hyalella azteca]	Metabolism;Metabolism;Metabolism;Metabolism	Global and overview maps;Amino acid metabolism;Metabolism of other amino acids;Amino acid metabolism	ko01100//Metabolic pathways;ko00330//Arginine and proline metabolism;ko00410//beta-Alanine metabolism;ko00340//Histidine metabolism	K08660;K08660;K08660;K08660	GO:0031988//membrane-bounded vesicle	GO:0008238//exopeptidase activity	-
PH2	ncbi_113826145	Rnf25	0.43657521	0.309293292	0.49725467	2.55E-58	6.83E-54	Rnf25	PREDICTED: E3 ubiquitin-protein ligase RNF25-like [Hyalella azteca]	-	-	-	-	-	-	-
PH2	ncbi_113822721	PNN	0.663363454	0.513878984	0.368370882	5.21E-58	1.39E-53	PNN	PREDICTED: dentin sialophosphoprotein-like [Hyalella azteca]	Genetic Information Processing;Genetic Information Processing	Translation;Translation	ko03013//RNA transport;ko03015//mRNA surveillance pathway	K13114;K13114	-	-	-
PH2	ncbi_113823845	hddc3	0.488804429	0.354449934	0.463675498	8.45E-58	2.26E-53	hddc3	PREDICTED: guanosine-3',5'-bis(diphosphate) 3'-pyrophosphohydrolase MESH1-like [Branchiostoma belcheri]	Metabolism	Nucleotide metabolism	ko00230//Purine metabolism	K21138	-	GO:0016787//hydrolase activity	-
PH2	ncbi_113830345	AUH	0.564134576	0.382899357	0.559074125	1.08E-57	2.89E-53	AUH	PREDICTED: methylglutaconyl-CoA hydratase, mitochondrial-like [Hyalella azteca]	Metabolism;Metabolism	Global and overview maps;Amino acid metabolism	ko01100//Metabolic pathways;ko00280//Valine, leucine and isoleucine degradation	K05607;K05607	-	-	-
PH2	ncbi_113803691	14-3-3zeta	1.024009229	0.793067635	0.368712904	3.15E-57	8.42E-53	14-3-3zeta	14-3-3 [Marsupenaeus japonicus]	Environmental Information Processing;Environmental Information Processing;Environmental Information Processing;Human Diseases;Environmental Information Processing;Human Diseases;Human Diseases;Cellular Processes;Organismal Systems;Cellular Processes;Human Diseases	Signal transduction;Signal transduction;Signal transduction;Infectious diseases;Signal transduction;Cancers;Infectious diseases;Cell growth and death;Aging;Cell growth and death;Infectious diseases	ko04151//PI3K-Akt signaling pathway;ko04390//Hippo signaling pathway;ko04013//MAPK signaling pathway - fly;ko05130//Pathogenic Escherichia coli infection;ko04391//Hippo signaling pathway -fly;ko05203//Viral carcinogenesis;ko05169//Epstein-Barr virus infection;ko04110//Cell cycle;ko04212//Longevity regulating pathway - worm;ko04114//Oocyte meiosis;ko05161//Hepatitis B	K16197;K16197;K16197;K16197;K16197;K16197;K16197;K16197;K16197;K16197;K16197	-	-	-
PH2	ncbi_113813532	COMMD4	0.636793975	0.490696848	0.375994683	3.36E-57	9.00E-53	COMMD4	PREDICTED: COMM domain-containing protein 4-like [Biomphalaria glabrata]	-	-	-	-	-	-	-
PH2	ncbi_113818566	BRIX1	0.660755035	0.498196809	0.407399732	1.18E-56	3.16E-52	BRIX1	PREDICTED: ribosome biogenesis protein BRX1 homolog [Lingula anatina]	-	-	-	-	-	-	-
PH2	ncbi_113814826	Nfyb	0.959285847	0.738495016	0.377372588	1.20E-56	3.21E-52	Nfyb	PREDICTED: nuclear transcription factor Y subunit B-1-like isoform X1 [Hyalella azteca]	Human Diseases;Human Diseases;Organismal Systems	Infectious diseases;Infectious diseases;Immune system	ko05166//HTLV-I infection;ko05152//Tuberculosis;ko04612//Antigen processing and presentation	K08065;K08065;K08065	-	GO:0005488//binding	-
PH2	ncbi_113822031	Pwp1	0.619450473	0.461938451	0.423288299	1.64E-56	4.38E-52	Pwp1	Periodic tryptophan protein 1-like protein [Zootermopsis nevadensis]	-	-	-	-	-	-	-
PH2	ncbi_113803431	Polr2d	0.696994671	0.532092122	0.389471584	2.60E-56	6.95E-52	Polr2d	PREDICTED: DNA-directed RNA polymerase II 16 kDa polypeptide-like [Hyalella azteca]	Metabolism;Human Diseases;Metabolism;Human Diseases;Metabolism;Genetic Information Processing	Global and overview maps;Neurodegenerative diseases;Nucleotide metabolism;Infectious diseases;Nucleotide metabolism;Transcription	ko01100//Metabolic pathways;ko05016//Huntington disease;ko00230//Purine metabolism;ko05169//Epstein-Barr virus infection;ko00240//Pyrimidine metabolism;ko03020//RNA polymerase	K03012;K03012;K03012;K03012;K03012;K03012	GO:0044451//nucleoplasm part	GO:0034062//RNA polymerase activity;GO:0097159//organic cyclic compound binding	GO:0006351//transcription, DNA-templated
PH2	ncbi_113822407	METTL5	0.409908322	0.284804724	0.525328201	1.19E-55	3.19E-51	METTL5	PREDICTED: methyltransferase-like protein 5 [Biomphalaria glabrata]	-	-	-	-	-	GO:0016741//transferase activity, transferring one-carbon groups	GO:0008152//metabolic process
PH2	ncbi_113829486	ncbi_113829486	0.42579314	0.296821502	0.520557101	1.30E-55	3.47E-51	--	PREDICTED: mediator of RNA polymerase II transcription subunit 16-like [Hyalella azteca]	-	-	-	-	-	-	-
PH2	ncbi_113820861	Tsnax	0.555722893	0.409490748	0.440534818	1.89E-55	5.07E-51	Tsnax	PREDICTED: translin-associated protein X-like [Branchiostoma belcheri]	-	-	-	-	GO:0044424//intracellular part	GO:0031685//adenosine receptor binding;GO:0043566//structure-specific DNA binding	-
PH2	ncbi_113828425	EIF2B1	0.496035302	0.358803336	0.467249494	5.23E-55	1.40E-50	EIF2B1	PREDICTED: translation initiation factor eIF-2B subunit alpha [Halyomorpha halys]	Genetic Information Processing	Translation	ko03013//RNA transport	K03239	-	-	GO:0006412//translation
PH2	ncbi_113829281	MED11	0.474229964	0.345525667	0.456793939	7.15E-55	1.92E-50	MED11	Mediator of RNA polymerase II transcription subunit 11 [Zootermopsis nevadensis]	-	-	-	-	-	-	GO:0006351//transcription, DNA-templated
PH2	ncbi_113816333	Dnajc1	0.568258769	0.410189394	0.470257852	7.35E-55	1.97E-50	Dnajc1	PREDICTED: dnaJ homolog subfamily C member 1-like [Pogonomyrmex barbatus]	Genetic Information Processing	Folding, sorting and degradation	ko04141//Protein processing in endoplasmic reticulum	K09521	-	-	-
PH2	ncbi_113807113	ncbi_113807113	0.563560344	0.415050733	0.441282405	9.53E-55	2.55E-50	--	GM20712 [Drosophila sechellia]	-	-	-	-	-	-	-
PH2	ncbi_113822664	AP2M1	0.565358466	0.408004647	0.470580317	2.50E-54	6.71E-50	AP2M1	clathrin-associated adaptor protein complexes mu subunit [Cherax quadricarinatus]	Human Diseases;Cellular Processes;Organismal Systems;Organismal Systems	Neurodegenerative diseases;Transport and catabolism;Nervous system;Excretory system	ko05016//Huntington disease;ko04144//Endocytosis;ko04721//Synaptic vesicle cycle;ko04961//Endocrine and other factor-regulated calcium reabsorption	K11826;K11826;K11826;K11826	GO:0016023//cytoplasmic, membrane-bounded vesicle;GO:0030131//clathrin adaptor complex	GO:0022892//substrate-specific transporter activity	GO:0001505//regulation of neurotransmitter levels;GO:0003006//developmental process involved in reproduction;GO:0006901//vesicle coating;GO:0009888//tissue development;GO:0015031//protein transport;GO:0044765//single-organism transport
PH2	ncbi_113825275	NIFK	0.534193944	0.412471165	0.373070355	7.55E-54	2.02E-49	NIFK	PREDICTED: MKI67 FHA domain-interacting nucleolar phosphoprotein [Cerapachys biroi]	-	-	-	-	-	-	-
PH2	ncbi_113808588	vps29	0.909076528	0.706873303	0.362950094	1.38E-53	3.69E-49	vps29	Xaa-pro dipeptidase-like protein [Coptotermes formosanus]	Cellular Processes	Transport and catabolism	ko04144//Endocytosis	K18467	-	-	-
PH2	ncbi_113828994	ncbi_113828994	0.579097433	0.429152998	0.432314024	9.97E-53	2.67E-48	--	PREDICTED: ribosomal protein 63, mitochondrial-like [Agrilus planipennis]	-	-	-	-	-	-	-
PH2	ncbi_113800156	ncbi_113800156	0.504314647	0.362102713	0.47792514	1.03E-52	2.77E-48	--	PREDICTED: 39S ribosomal protein L42, mitochondrial-like [Hyalella azteca]	-	-	-	-	-	-	-
PH2	ncbi_113802382	pit	0.721721873	0.562868502	0.358645061	1.20E-52	3.22E-48	pit	ATP-dependent RNA Helicase pitchoune [Daphnia magna]	-	-	-	-	-	-	-
PH2	ncbi_113810483	UGP2	0.539068768	0.390145468	0.466457184	1.82E-52	4.86E-48	UGP2	PREDICTED: UTP--glucose-1-phosphate uridylyltransferase-like isoform X1 [Hyalella azteca]	Metabolism;Metabolism;Metabolism;Metabolism;Metabolism	Global and overview maps;Carbohydrate metabolism;Carbohydrate metabolism;Carbohydrate metabolism;Carbohydrate metabolism	ko01100//Metabolic pathways;ko00520//Amino sugar and nucleotide sugar metabolism;ko00040//Pentose and glucuronate interconversions;ko00500//Starch and sucrose metabolism;ko00052//Galactose metabolism	K00963;K00963;K00963;K00963;K00963	-	GO:0016779//nucleotidyltransferase activity	GO:0009225//nucleotide-sugar metabolic process
PH2	ncbi_113816831	NUBP2	0.572178169	0.426870469	0.422666093	5.58E-52	1.49E-47	NUBP2	PREDICTED: cytosolic Fe-S cluster assembly factor NUBP2 [Callorhinchus milii]	-	-	-	-	-	-	-
PH2	ncbi_113803835	TRIADDRAFT_35934	0.866176994	0.668958893	0.372744293	1.82E-51	4.88E-47	TRIADDRAFT_35934	PREDICTED: ubiquitin-fold modifier-conjugating enzyme 1 [Cephus cinctus]	-	-	-	-	-	-	-
PH2	ncbi_113805915	Cdc123	0.526573604	0.390085647	0.432844288	3.32E-51	8.90E-47	Cdc123	PREDICTED: cell division cycle protein 123 homolog [Hyalella azteca]	-	-	-	-	-	-	-
PH2	ncbi_113818225	ncbi_113818225	0.851062219	0.659801908	0.367231658	3.40E-51	9.11E-47	--	PREDICTED: uncharacterized protein LOC108671825 [Hyalella azteca]	-	-	-	-	-	-	-
PH2	ncbi_113827326	ncbi_113827326	0.528323147	0.40126671	0.396859149	1.42E-50	3.79E-46	--	-	-	-	-	-	-	-	-
PH2	ncbi_113816020	Adat3	0.617061098	0.480411133	0.361143761	1.82E-50	4.87E-46	Adat3	PREDICTED: probable inactive tRNA-specific adenosine deaminase-like protein 3 isoform X2 [Branchiostoma belcheri]	-	-	-	-	-	-	-
PH2	ncbi_113826245	Arpc5	0.406853594	0.284768688	0.514719215	3.42E-50	9.15E-46	Arpc5	PREDICTED: actin-related protein 2/3 complex subunit 5-like [Hyalella azteca]	Cellular Processes;Cellular Processes;Human Diseases;Human Diseases;Human Diseases;Human Diseases;Organismal Systems	Cell motility;Transport and catabolism;Infectious diseases;Infectious diseases;Infectious diseases;Infectious diseases;Immune system	ko04810//Regulation of actin cytoskeleton;ko04144//Endocytosis;ko05130//Pathogenic Escherichia coli infection;ko05131//Shigellosis;ko05132//Salmonella infection;ko05100//Bacterial invasion of epithelial cells;ko04666//Fc gamma R-mediated phagocytosis	K05754;K05754;K05754;K05754;K05754;K05754;K05754	-	-	-
PH2	ncbi_113828411	ncbi_113828411	0.560253253	0.41204756	0.443268254	5.33E-50	1.43E-45	--	-	-	-	-	-	-	-	-
PH2	ncbi_113807119	tma16	0.438388117	0.334059994	0.392101471	8.27E-50	2.22E-45	tma16	PREDICTED: translation machinery-associated protein 16-like [Crassostrea gigas]	-	-	-	-	-	-	-
PH2	ncbi_113802276	blp	0.441809712	0.322319816	0.454932244	1.12E-49	3.00E-45	blp	mitochondria-associated granulocyte macrophage CSF signaling molecule [Bombyx mori]	-	-	-	-	-	-	GO:0006839//mitochondrial transport
PH2	ncbi_113803764	MRPS21	0.467324361	0.351489754	0.41094161	1.23E-49	3.30E-45	MRPS21	PREDICTED: 28S ribosomal protein S21, mitochondrial [Athalia rosae]	Genetic Information Processing	Translation	ko03010//Ribosome	K02970	GO:0000314//organellar small ribosomal subunit	-	GO:0010467//gene expression
PH2	ncbi_113814810	Dpp3	0.56164594	0.435583708	0.366710954	5.69E-49	1.52E-44	Dpp3	PREDICTED: dipeptidyl peptidase 3-like isoform X1 [Hyalella azteca]	-	-	-	-	-	-	-
PH2	ncbi_113800555	tmem11	0.841308295	0.652864728	0.365850469	8.72E-49	2.33E-44	tmem11	PREDICTED: transmembrane protein 11, mitochondrial-like [Hyalella azteca]	-	-	-	-	-	-	-
PH2	ncbi_113827782	GATAD2B	0.577798772	0.418829335	0.464204647	9.20E-49	2.46E-44	GATAD2B	PREDICTED: transcriptional repressor p66-beta [Aethina tumida]	-	-	-	-	-	-	-
PH2	ncbi_113818773	ncbi_113818773	0.41166377	0.311417048	0.402618562	1.73E-48	4.64E-44	--	-	-	-	-	-	-	-	-
PH2	ncbi_113817810	sde2	0.650513358	0.498405418	0.384258929	2.09E-48	5.60E-44	sde2	PREDICTED: protein SDE2 homolog [Hyalella azteca]	-	-	-	-	-	-	-
PH2	ncbi_113803427	CG40228	0.647887429	0.499778506	0.37445431	3.54E-48	9.47E-44	CG40228	PREDICTED: transcription elongation factor 1 homolog [Diaphorina citri]	-	-	-	-	-	-	-
PH2	ncbi_113827556	SLC25A20	0.689569161	0.535925722	0.363662195	1.01E-47	2.71E-43	SLC25A20	PREDICTED: mitochondrial carnitine/acylcarnitine carrier protein-like [Hyalella azteca]	Organismal Systems	Environmental adaptation	ko04714//Thermogenesis	K15109	GO:0031224//intrinsic component of membrane	-	GO:0051234//establishment of localization
PH2	ncbi_113824599	Ascc1	0.455457282	0.326432194	0.480532398	2.13E-47	5.70E-43	Ascc1	PREDICTED: activating signal cointegrator 1 complex subunit 1-like [Limulus polyphemus]	-	-	-	-	-	-	-
PH2	ncbi_113830528	MAFF	0.626412487	0.487636922	0.361305608	1.32E-46	3.54E-42	MAFF	PREDICTED: transcription factor MafG-like [Hyalella azteca]	-	-	-	-	-	-	-
PH2	ncbi_113826853	VPS35	0.43797483	0.32805205	0.416923225	2.20E-46	5.89E-42	VPS35	Vacuolar protein sorting-associated protein 35 [Zootermopsis nevadensis]	Cellular Processes	Transport and catabolism	ko04144//Endocytosis	K18468	-	-	-
PH2	ncbi_113807513	Taf7	0.582097441	0.450884062	0.36850416	3.29E-46	8.82E-42	Taf7	PREDICTED: transcription initiation factor TFIID subunit 7 [Athalia rosae]	Genetic Information Processing	Transcription	ko03022//Basal transcription factors	K03132	-	-	-
PH2	ncbi_113828657	PINX1	0.553563709	0.431527353	0.359297355	6.80E-46	1.82E-41	PINX1	Pinx1, partial [Litopenaeus vannamei]	-	-	-	-	GO:0043232//intracellular non-membrane-bounded organelle;GO:0044446//intracellular organelle part	-	-
PH2	ncbi_113822116	ncbi_113822116	0.434874648	0.306327055	0.505526814	8.38E-46	2.24E-41	--	cation-dependent mannose-6-phosphate receptor, partial [Marsupenaeus japonicus]	Cellular Processes;Cellular Processes	Transport and catabolism;Transport and catabolism	ko04145//Phagosome;ko04142//Lysosome	K10089;K10089	GO:0005768//endosome	GO:0005488//binding	GO:0006810//transport
PH2	ncbi_113805907	snf8	0.563617125	0.434183743	0.376409737	9.41E-46	2.52E-41	snf8	Vacuolar-sorting protein SNF8 [Zootermopsis nevadensis]	Cellular Processes	Transport and catabolism	ko04144//Endocytosis	K12188	-	-	-
PH2	ncbi_113824584	ncbi_113824584	0.429882646	0.335207409	0.358888834	4.00E-45	1.07E-40	--	AGAP005843-PA [Anopheles gambiae str. PEST] [Anopheles gambiae]	-	-	-	-	-	-	-
PH2	ncbi_113828897	Imp3	0.50236446	0.387342593	0.375124253	1.00E-44	2.68E-40	Imp3	U3 small nucleolar ribonucleoprotein IMP3 [Zootermopsis nevadensis]	Genetic Information Processing	Translation	ko03008//Ribosome biogenesis in eukaryotes	K14560	-	-	-
PH2	ncbi_113814488	PQBP1	0.471366853	0.357216094	0.400053228	1.57E-44	4.21E-40	PQBP1	PREDICTED: polyglutamine-binding protein 1 [Polistes dominula]	Genetic Information Processing	Transcription	ko03040//Spliceosome	K12865	-	-	-
PH2	ncbi_113813533	rdgB	0.455933121	0.341820202	0.415584551	1.76E-44	4.72E-40	rdgB	Protein retinal degeneration B [Zootermopsis nevadensis]	-	-	-	-	-	-	-
PH2	ncbi_113826348	ncbi_113826348	0.625983446	0.481141927	0.379661983	3.37E-44	9.02E-40	--	Protein HEXIM [Zootermopsis nevadensis]	-	-	-	-	-	-	-
PH2	ncbi_113822073	MCFD2	0.440163061	0.320019204	0.459879594	4.18E-44	1.12E-39	MCFD2	Multiple coagulation factor deficiency protein 2 [Daphnia magna]	-	-	-	-	-	-	-
PH2	ncbi_113824156	Nus1	0.480532383	0.367017067	0.388786502	9.78E-44	2.62E-39	Nus1	Nogo-B receptor [Tupaia chinensis]	Metabolism	Metabolism of terpenoids and polyketides	ko00900//Terpenoid backbone biosynthesis	K19177	-	-	-
PH2	ncbi_113821585	tomm20	0.565462605	0.433872548	0.382160313	1.10E-43	2.94E-39	tomm20	PREDICTED: mitochondrial import receptor subunit TOM20 homolog [Agrilus planipennis]	-	-	-	-	-	-	-
PH2	ncbi_113820262	ncbi_113820262	0.508125965	0.390156619	0.381132812	1.10E-43	2.96E-39	--	PREDICTED: protein TSSC4-like [Hyalella azteca]	-	-	-	-	-	-	-
PH2	ncbi_113828229	EloA	0.557615723	0.428008707	0.381631094	2.34E-43	6.26E-39	EloA	PREDICTED: transcription elongation factor B polypeptide 3-like isoform X1 [Hyalella azteca]	-	-	-	-	-	-	-
PH2	ncbi_113809516	sec61ab	0.461247226	0.345589216	0.416482034	7.50E-43	2.01E-38	sec61ab	PREDICTED: protein transport protein Sec61 subunit alpha isoform 2 [Tetranychus urticae]	Genetic Information Processing;Cellular Processes;Human Diseases;Genetic Information Processing	Folding, sorting and degradation;Transport and catabolism;Infectious diseases;Folding, sorting and degradation	ko04141//Protein processing in endoplasmic reticulum;ko04145//Phagosome;ko05110//Vibrio cholerae infection;ko03060//Protein export	K10956;K10956;K10956;K10956	GO:0031224//intrinsic component of membrane	-	GO:0008104//protein localization
PH2	ncbi_113820664	ncbi_113820664	0.412490432	0.309255637	0.415560765	1.02E-42	2.73E-38	--	PREDICTED: vesicle transport protein SEC20-like [Hyalella azteca]	Genetic Information Processing	Folding, sorting and degradation	ko04130//SNARE interactions in vesicular transport	K08497	-	GO:0046983//protein dimerization activity	-
PH2	ncbi_113800646	SSSCA1	0.446504353	0.348111195	0.359126031	9.56E-42	2.56E-37	SSSCA1	PREDICTED: Sjoegren syndrome/scleroderma autoantigen 1 [Crassostrea gigas]	-	-	-	-	-	-	-
PH2	ncbi_113820186	ncbi_113820186	0.422735383	0.324888702	0.379809298	4.33E-41	1.16E-36	--	Zn-finger in Ran binding protein and others domain containing protein [Acanthamoeba castellanii str. Neff] [Acanthamoeba castellanii]	-	-	-	-	-	-	-
PH2	ncbi_113820082	MAD1L1	0.428589799	0.332027944	0.368292843	8.54E-41	2.29E-36	MAD1L1	PREDICTED: mitotic spindle assembly checkpoint protein MAD1-like [Hyalella azteca]	Human Diseases;Cellular Processes;Organismal Systems	Cancers;Cell growth and death;Endocrine system	ko05203//Viral carcinogenesis;ko04110//Cell cycle;ko04914//Progesterone-mediated oocyte maturation	K06638;K06638;K06638	-	-	-
PH2	ncbi_113805078	CDK5RAP3	0.492656598	0.375004793	0.393673342	9.73E-41	2.61E-36	CDK5RAP3	PREDICTED: CDK5 regulatory subunit-associated protein 3 isoform X1 [Cephus cinctus]	-	-	-	-	-	-	-
PH2	ncbi_113803606	Eif4e2	0.468950398	0.357878535	0.389965319	3.17E-40	8.49E-36	Eif4e2	eukaryotic initiation factor elF4E like protein, partial [Marsupenaeus japonicus]	Environmental Information Processing;Genetic Information Processing;Environmental Information Processing;Organismal Systems;Environmental Information Processing;Organismal Systems;Human Diseases	Signal transduction;Translation;Signal transduction;Endocrine system;Signal transduction;Aging;Drug resistance	ko04151//PI3K-Akt signaling pathway;ko03013//RNA transport;ko04150//mTOR signaling pathway;ko04910//Insulin signaling pathway;ko04066//HIF-1 signaling pathway;ko04211//Longevity regulating pathway - mammal;ko01521//EGFR tyrosine kinase inhibitor resistance	K03259;K03259;K03259;K03259;K03259;K03259;K03259	-	-	-
PH2	ncbi_113818836	Cnpy4	0.449254141	0.340241898	0.400970993	4.47E-40	1.20E-35	Cnpy4	PREDICTED: protein canopy homolog 4-like [Hyalella azteca]	-	-	-	-	-	-	-
PH2	ncbi_113807538	ZNFX1	0.806448288	0.592264086	0.44534142	6.55E-40	1.75E-35	ZNFX1	PREDICTED: NFX1-type zinc finger-containing protein 1-like, partial [Hyalella azteca]	-	-	-	-	-	-	-
PH2	ncbi_113805311	ncbi_113805311	0.455754266	0.341934387	0.414536643	8.02E-40	2.15E-35	--	-	-	-	-	-	-	-	-
PH2	ncbi_113801840	CPIJ005690	0.434301732	0.333469771	0.381141717	8.04E-40	2.15E-35	CPIJ005690	ATPase ASNA1-like protein [Zootermopsis nevadensis]	-	-	-	-	-	-	-
PH2	ncbi_113829627	ncbi_113829627	0.436589892	0.32236907	0.437565398	6.37E-38	1.71E-33	--	-	-	-	-	-	-	-	-
PH2	ncbi_113818033	ADTRP	0.4360227	0.338045419	0.36718615	2.91E-37	7.79E-33	ADTRP	PREDICTED: androgen-induced gene 1 protein isoform X1 [Crassostrea gigas]	-	-	-	-	-	-	-
PH2	ncbi_113811235	ubl4a	0.468307033	0.353965304	0.403846752	1.23E-36	3.28E-32	ubl4a	PREDICTED: ubiquitin-like protein 4A [Hyalella azteca]	-	-	-	-	-	-	-
PH2	ncbi_113826183	Chtop	0.458229452	0.351739026	0.381564775	1.54E-36	4.13E-32	Chtop	PREDICTED: chromatin target of PRMT1 protein [Fundulus heteroclitus]	-	-	-	-	-	-	-
PH2	ncbi_113825439	ncbi_113825439	0.41088625	0.317358998	0.372623303	2.05E-36	5.48E-32	--	PREDICTED: zinc finger protein 197-like isoform X2 [Bemisia tabaci]	-	-	-	-	-	-	-
PH2	ncbi_113811664	ncbi_113811664	0.398660131	0.30661184	0.37874592	1.41E-35	3.78E-31	--	PREDICTED: apoptosis regulatory protein Siva [Camponotus floridanus]	-	-	-	-	-	-	-
