# Supplementary material for: Single-cell RNA sequencing analysis of shrimp immune cells identifies macrophage-like phagocytes
Source: eLife. 2022 Oct 6;11:e80127. doi: 10.7554/eLife.80127 (PMC9584607; doi:10.7554/eLife.80127)
Supplement: Supplementary file 7. [file elife-80127-supp7.csv]

Target_Cluster	Gene ID	Gene Name	Target_Cluster_mean	Other_Cluster_mean	Log2FC	Pvalue	Qvalue	Symbol	Description	KEGG_A_class	KEGG_B_class	Pathway	K_ID	GO Component	GO Function	GO Process
GH1	ncbi_113826969	RGN	1.203672486	0.212008178	2.505251073	0	0	RGN	PREDICTED: regucalcin-like [Megachile rotundata]	Metabolism;Metabolism;Metabolism;Metabolism	Global and overview maps;Global and overview maps;Carbohydrate metabolism;Carbohydrate metabolism	ko01100//Metabolic pathways;ko01200//Carbon metabolism;ko00053//Ascorbate and aldarate metabolism;ko00030//Pentose phosphate pathway	K01053;K01053;K01053;K01053	GO:0044424//intracellular part	GO:0046872//metal ion binding	GO:0044763//single-organism cellular process;GO:0050790//regulation of catalytic activity
GH1	ncbi_113807911	rgn	4.497115776	1.012790379	2.150664421	0	0	rgn	PREDICTED: regucalcin-like isoform X2 [Acromyrmex echinatior]	Metabolism;Metabolism;Metabolism;Metabolism	Global and overview maps;Global and overview maps;Carbohydrate metabolism;Carbohydrate metabolism	ko01100//Metabolic pathways;ko01200//Carbon metabolism;ko00053//Ascorbate and aldarate metabolism;ko00030//Pentose phosphate pathway	K01053;K01053;K01053;K01053	-	-	-
GH1	ncbi_113800677	ncbi_113800677	2.529393108	0.585169305	2.111865271	0	0	--	-	-	-	-	-	-	-	-
GH1	ncbi_113815774	ncbi_113815774	3.119534495	0.785630216	1.989408439	0	0	--	double WAP domain-containing protein [Fenneropenaeus chinensis]	-	-	-	-	-	-	-
GH1	ncbi_113802174	ncbi_113802174	126.6062238	32.09093853	1.980110439	0	0	--	stylicine 2, partial [Litopenaeus stylirostris]	-	-	-	-	-	-	-
GH1	ncbi_113802490	PPAF2	2.876559895	0.74742581	1.944342221	0	0	PPAF2	serine protease-like protein 3 [Penaeus monodon]	-	-	-	-	-	-	-
GH1	ncbi_113811237	Arg2	3.108131467	0.816132121	1.929172899	0	0	Arg2	PREDICTED: arginase-1 isoform X2 [Nanorana parkeri]	Metabolism;Metabolism;Human Diseases;Metabolism;Metabolism	Global and overview maps;Global and overview maps;Infectious diseases;Amino acid metabolism;Amino acid metabolism	ko01100//Metabolic pathways;ko01230//Biosynthesis of amino acids;ko05146//Amoebiasis;ko00330//Arginine and proline metabolism;ko00220//Arginine biosynthesis	K01476;K01476;K01476;K01476;K01476	-	GO:0016787//hydrolase activity	-
GH1	ncbi_113813598	ncbi_113813598	631.3144283	185.9209473	1.763669399	0	0	--	single IB domain protein [Litopenaeus vannamei]	-	-	-	-	-	-	-
GH1	ncbi_113818447	ncbi_113818447	15.97121749	4.79115748	1.737028155	0	0	--	-	-	-	-	-	-	-	-
GH1	ncbi_113810419	ncbi_113810419	0.4929996	0.148103872	1.734977121	0	0	--	Juvenile hormone-inducible protein [Culex quinquefasciatus]	-	-	-	-	-	-	-
GH1	ncbi_113801793	ncbi_113801793	0.499030613	0.153907827	1.697061715	0	0	--	PREDICTED: kynurenine formamidase-like [Hyalella azteca]	-	-	-	-	-	-	-
GH1	ncbi_113821158	ncbi_113821158	15.17317631	4.729747588	1.681688028	0	0	--	crustin 2 [Panulirus japonicus]	-	-	-	-	-	-	-
GH1	ncbi_113802754	ncbi_113802754	20.57706111	6.637708757	1.632279711	0	0	--	crustacean hematopoietic factor-like protein [Litopenaeus vannamei]	-	-	-	-	-	-	-
GH1	ncbi_113812972	Ces2c	4.334359219	1.461431265	1.568436748	0	0	Ces2c	juvenile hormone esterase-like carboxylesterase 1 [Eriocheir sinensis]	Metabolism	Metabolism of terpenoids and polyketides	ko00981//Insect hormone biosynthesis	K01063	-	-	-
GH1	ncbi_113828564	PPAF2	1.217990132	0.411921123	1.56406243	0	0	PPAF2	prophenoloxidase activating factor [Litopenaeus vannamei]	-	-	-	-	-	-	-
GH1	ncbi_113826593	A2ML1	0.8501015	0.288050658	1.561312554	0	0	A2ML1	alpha 2 macroglobulin [Litopenaeus vannamei]	Organismal Systems	Immune system	ko04610//Complement and coagulation cascades	K03910	-	-	-
GH1	ncbi_113828686	SPE	1.097758681	0.374693624	1.550777611	0	0	SPE	serine proteinase homologue, partial [Marsupenaeus japonicus]	-	-	-	-	-	GO:0003824//catalytic activity	-
GH1	ncbi_113828743	PPO1	35.12859894	12.03338375	1.545603656	0	0	PPO1	prophenoloxidase 2 [Litopenaeus vannamei]	-	-	-	-	-	-	-
GH1	ncbi_113802179	ncbi_113802179	517.8311512	179.7494036	1.526494772	0	0	--	fortilin binding protein 1 [Penaeus monodon]	-	-	-	-	-	-	-
GH1	ncbi_113825264	EPHX4	1.032137903	0.37207773	1.471959791	0	0	EPHX4	PREDICTED: epoxide hydrolase 4-like [Hyalella azteca]	-	-	-	-	-	-	-
GH1	ncbi_113803873	ncbi_113803873	21.60504053	7.863205355	1.4581785	0	0	--	Kazal-type proteinase inhibitor [Litopenaeus vannamei]	-	-	-	-	-	-	-
GH1	ncbi_113828683	PPAF1	1.70644995	0.651247416	1.389720453	0	0	PPAF1	serine proteinase homologue, partial [Marsupenaeus japonicus]	-	-	-	-	-	-	-
GH1	ncbi_113809104	ncbi_113809104	5.933238396	2.277645752	1.381276373	0	0	--	hypothetical protein TTHERM_01000170 [Tetrahymena thermophila SB210]	-	-	-	-	-	-	-
GH1	ncbi_113819972	ncbi_113819972	2.765366577	1.065418619	1.376050338	0	0	--	PREDICTED: uncharacterized protein LOC108665911 [Hyalella azteca]	-	-	-	-	-	-	-
GH1	ncbi_113809076	PPAF2	1.04868672	0.404846651	1.373136311	0	0	PPAF2	serine proteinase 1 [Portunus trituberculatus]	-	-	-	-	-	-	-
GH1	ncbi_113802172	ncbi_113802172	114.4266314	44.20372749	1.372182925	0	0	--	stylicine 2, partial [Litopenaeus stylirostris]	-	-	-	-	-	-	-
GH1	ncbi_113820206	ncbi_113820206	223.4619234	87.20736374	1.35750716	0	0	--	single WAP domain protein [Litopenaeus vannamei]	-	-	-	-	-	-	-
GH1	ncbi_113800363	ncbi_113800363	208.9522916	86.80968233	1.267245713	0	0	--	anti-lipopolysaccharide AV-R isoform [Litopenaeus vannamei]	-	-	-	-	-	-	-
GH1	ncbi_113800690	ncbi_113800690	13.39603384	5.585526233	1.262040812	0	0	--	-	-	-	-	-	-	-	-
GH1	ncbi_113817634	GstD1	1.990238887	0.835899928	1.251539466	0	0	GstD1	PREDICTED: protein URE2-like [Drosophila biarmipes]	Human Diseases;Human Diseases;Human Diseases;Metabolism;Metabolism;Organismal Systems;Human Diseases;Human Diseases;Human Diseases;Metabolism;Metabolism	Cancers;Cancers;Cardiovascular diseases;Metabolism of other amino acids;Xenobiotics biodegradation and metabolism;Aging;Drug resistance;Cancers;Cancers;Xenobiotics biodegradation and metabolism;Xenobiotics biodegradation and metabolism	ko05200//Pathways in cancer;ko05225//Hepatocellular carcinoma;ko05418//Fluid shear stress and atherosclerosis;ko00480//Glutathione metabolism;ko00983//Drug metabolism - other enzymes;ko04212//Longevity regulating pathway - worm;ko01524//Platinum drug resistance;ko05215//Prostate cancer;ko05204//Chemical carcinogenesis;ko00980//Metabolism of xenobiotics by cytochrome P450;ko00982//Drug metabolism …	K00799;K00799;K00799;K00799;K00799;K00799;K00799;K00799;K00799;K00799;K00799	-	-	-
GH1	ncbi_113827090	PPO3	8.51679998	3.663355836	1.217145626	0	0	PPO3	prophenoloxidase-1 [Litopenaeus vannamei]	-	-	-	-	-	-	-
GH1	ncbi_113829541	ADA	0.912098916	0.406378011	1.166367953	0	0	ADA	PREDICTED: adenosine deaminase-like [Hyalella azteca]	Metabolism;Metabolism;Human Diseases	Global and overview maps;Nucleotide metabolism;Immune diseases	ko01100//Metabolic pathways;ko00230//Purine metabolism;ko05340//Primary immunodeficiency	K01488;K01488;K01488	-	-	-
GH1	ncbi_113808589	ncbi_113808589	51.2074951	23.26619907	1.138119447	0	0	--	crustacean hematopoietic factor-like protein [Litopenaeus vannamei]	-	-	-	-	-	-	-
GH1	ncbi_113825375	ncbi_113825375	2.132061563	0.969680475	1.136667757	0	0	--	-	-	-	-	-	-	-	-
GH1	ncbi_113818568	ncbi_113818568	0.640683985	0.292630687	1.130531863	0	0	--	-	-	-	-	-	-	-	-
GH1	ncbi_113818642	CG2145	4.880284373	2.234058983	1.12729794	0	0	CG2145	PREDICTED: poly(U)-specific endoribonuclease-A-like [Hyalella azteca]	-	-	-	-	-	-	-
GH1	ncbi_113815917	Ces2a	0.766069703	0.352731628	1.118904722	0	0	Ces2a	juvenile hormone esterase-like carboxylesterase 1 [Eriocheir sinensis]	-	-	-	-	-	-	-
GH1	ncbi_113803037	ncbi_113803037	0.555570473	0.258510542	1.103746811	0	0	--	-	-	-	-	-	-	-	-
GH1	ncbi_113815775	ncbi_113815775	275.6404035	129.9930995	1.084352333	0	0	--	secretory leukocyte proteinase inhibitor [Litopenaeus vannamei]	-	-	-	-	-	-	-
GH1	ncbi_113814568	Ppn	0.977451676	0.463007586	1.077989548	0	0	Ppn	pacifastin light chain-like serine proteinase inhibitor [Litopenaeus vannamei]	-	-	-	-	-	-	-
GH1	ncbi_113823273	Tmprss2	0.874721969	0.42631704	1.036897806	0	0	Tmprss2	serine proteinase [Fenneropenaeus chinensis]	-	-	-	-	-	-	-
GH1	ncbi_113813970	ncbi_113813970	1.527617733	0.753668802	1.019280993	0	0	--	PREDICTED: chymotrypsin-like protease CTRL-1 isoform X1 [Hyalella azteca]	-	-	-	-	-	-	-
GH1	ncbi_113828684	PPAF1	0.510089405	0.253632432	1.008010904	0	0	PPAF1	serine protease [Fenneropenaeus chinensis]	-	-	-	-	-	GO:0003824//catalytic activity	-
GH1	ncbi_113808997	PEN-3	306.7129871	158.356001	0.953717715	0	0	PEN-3	penaeidin 3a.1 [Litopenaeus vannamei]	-	-	-	-	-	-	-
GH1	ncbi_113803998	FCN1	11.34936162	5.919224812	0.939130994	0	0	FCN1	fibrinogen-related protein 2 [Litopenaeus vannamei]	-	-	-	-	-	-	-
GH1	ncbi_113817651	PPAF3	0.875333183	0.459765353	0.92893451	0	0	PPAF3	serine protease [Scylla paramamosain]	-	-	-	-	-	-	-
GH1	ncbi_113816267	ncbi_113816267	119.8304887	64.19369454	0.900491523	0	0	--	crustin-like protein [Litopenaeus vannamei]	-	-	-	-	-	-	-
GH1	ncbi_113816684	GPx	3.914801544	2.185976417	0.840661337	0	0	GPx	Glutathione peroxidase 6 [Zootermopsis nevadensis]	Human Diseases;Metabolism;Organismal Systems;Metabolism;Human Diseases	Neurodegenerative diseases;Metabolism of other amino acids;Endocrine system;Lipid metabolism;Neurodegenerative diseases	ko05016//Huntington disease;ko00480//Glutathione metabolism;ko04918//Thyroid hormone synthesis;ko00590//Arachidonic acid metabolism;ko05014//Amyotrophic lateral sclerosis (ALS)	K00432;K00432;K00432;K00432;K00432	-	GO:0016491//oxidoreductase activity	-
GH1	ncbi_113828272	ncbi_113828272	1.197961441	0.675898468	0.825703024	0	0	--	PREDICTED: uncharacterized protein LOC108676636 [Hyalella azteca]	-	-	-	-	-	-	-
GH1	ncbi_113823946	TGM1	25.32427384	14.51666141	0.802811205	0	0	TGM1	type II hemocyte transglutaminase [Litopenaeus vannamei]	-	-	-	-	-	-	-
GH1	ncbi_113816329	ncbi_113816329	3.042732406	1.757566415	0.791788254	0	0	--	PREDICTED: pentraxin-related protein PTX3-like [Hyalella azteca]	-	-	-	-	-	-	-
GH1	ncbi_113810844	ncbi_113810844	1.95865908	1.151192049	0.766737774	0	0	--	-	-	-	-	-	-	-	-
GH1	ncbi_113810045	ncbi_113810045	3.59620416	2.114654082	0.766053241	0	0	--	anti-lipopolysaccharide factor [Litopenaeus stylirostris]	-	-	-	-	-	-	-
GH1	ncbi_113806288	SERPINB1	1.386484418	0.818974042	0.759541772	0	0	SERPINB1	serine proteinase inhibitor 7 [Litopenaeus vannamei]	Human Diseases	Infectious diseases	ko05146//Amoebiasis	K13963	-	-	-
GH1	ncbi_113820837	ARSD	1.692803931	1.009285046	0.746081199	0	0	ARSD	PREDICTED: arylsulfatase D-like [Hyalella azteca]	-	-	-	-	-	-	-
GH1	ncbi_113810839	ncbi_113810839	2.979035885	1.777896936	0.744673808	0	0	--	-	-	-	-	-	-	-	-
GH1	ncbi_113802698	Fli1	0.943849799	0.573033597	0.719937566	0	0	Fli1	PREDICTED: transcriptional regulator ERG isoform X5 [Bos taurus]	-	-	-	-	-	-	-
GH1	ncbi_113818944	ncbi_113818944	62.17918818	37.75313334	0.719835394	0	0	--	-	-	-	-	-	-	-	-
GH1	ncbi_113802843	ncbi_113802843	1.591581296	0.98055881	0.698784785	0	0	--	PREDICTED: bcl-2-like protein 1 [Hyalella azteca]	Human Diseases;Environmental Information Processing;Human Diseases;Cellular Processes;Human Diseases;Human Diseases;Environmental Information Processing;Cellular Processes;Human Diseases;Human Diseases;Organismal Systems;Human Diseases;Cellular Processes;Human Diseases;Environmental Information Processing;Human Diseases;Human Diseases;Cellular Processes;Human Diseases;Cellular Processes;Environme…	Cancers;Signal transduction;Cancers;Cell growth and death;Infectious diseases;Cancers;Signal transduction;Transport and catabolism;Drug resistance;Infectious diseases;Immune system;Cancers;Cell growth and death;Cancers;Signal transduction;Cancers;Drug resistance;Transport and catabolism;Neurodegenerative diseases;Cell growth and death;Signal transduction	ko05200//Pathways in cancer;ko04151//PI3K-Akt signaling pathway;ko05225//Hepatocellular carcinoma;ko04210//Apoptosis;ko05166//HTLV-I infection;ko05202//Transcriptional misregulation in cancers;ko04014//Ras signaling pathway;ko04140//Autophagy - animal;ko01524//Platinum drug resistance;ko05145//Toxoplasmosis;ko04621//NOD-like receptor signaling pathway;ko05222//Small cell lung cancer;ko04215//Apop…	K04570;K04570;K04570;K04570;K04570;K04570;K04570;K04570;K04570;K04570;K04570;K04570;K04570;K04570;K04570;K04570;K04570;K04570;K04570;K04570;K04570	-	-	-
GH1	ncbi_113816893	ncbi_113816893	2.80814841	1.732326197	0.696908568	0	0	--	hypothetical protein X975_08902, partial [Stegodyphus mimosarum]	-	-	-	-	-	-	-
GH1	ncbi_113801825	ncbi_113801825	240.4392766	150.099432	0.679754067	0	0	--	crustin, partial [Litopenaeus vannamei]	-	-	-	-	-	-	-
GH1	ncbi_113830625	ncbi_113830625	5.840368259	3.733987415	0.645342274	0	0	--	antilipopolysaccharide factor isoform 5 [Fenneropenaeus chinensis]	-	-	-	-	-	-	-
GH1	ncbi_113814570	ncbi_113814570	9.346166675	6.001626015	0.639021344	0	0	--	PREDICTED: pacifastin-like protease inhibitor cvp4 isoform X4 [Anoplophora glabripennis]	-	-	-	-	-	-	-
GH1	ncbi_113811531	CSTB	8.927008674	5.769045165	0.62984427	0	0	CSTB	PREDICTED: cystatin-B [Nipponia nippon]	-	-	-	-	-	-	-
GH1	ncbi_113829528	Pdi	8.449178816	5.499703199	0.619457368	0	0	Pdi	protein disulfide isomerase [Litopenaeus vannamei]	Genetic Information Processing	Folding, sorting and degradation	ko04141//Protein processing in endoplasmic reticulum	K09580	-	-	-
GH1	ncbi_113816889	tpi1b	53.37039482	35.09127483	0.604927324	0	0	tpi1b	triose-phosphate isomerase [Litopenaeus vannamei]	Metabolism;Metabolism;Metabolism;Metabolism;Metabolism;Metabolism	Global and overview maps;Global and overview maps;Carbohydrate metabolism;Global and overview maps;Carbohydrate metabolism;Carbohydrate metabolism	ko01100//Metabolic pathways;ko01200//Carbon metabolism;ko00010//Glycolysis / Gluconeogenesis;ko01230//Biosynthesis of amino acids;ko00562//Inositol phosphate metabolism;ko00051//Fructose and mannose metabolism	K01803;K01803;K01803;K01803;K01803;K01803	-	-	-
GH1	ncbi_113805927	Manf	10.8580129	7.164333595	0.599855682	0	0	Manf	mesencephalic astrocyte-derived neurotrophic factor-like protein [Lasius niger]	-	-	-	-	-	-	-
GH1	ncbi_113802412	ncbi_113802412	1.712733096	1.145975245	0.579724466	0	0	--	PREDICTED: protein scylla-like [Hyalella azteca]	-	-	-	-	-	-	-
GH1	ncbi_113801959	LIPF	0.683103324	0.458207832	0.576101694	0	0	LIPF	triacylglycerol lipase [Portunus trituberculatus]	Cellular Processes;Organismal Systems;Metabolism	Transport and catabolism;Digestive system;Lipid metabolism	ko04142//Lysosome;ko04979//Cholesterol metabolism;ko00100//Steroid biosynthesis	K01052;K01052;K01052	-	-	-
GH1	ncbi_113810910	ncbi_113810910	7.456127118	5.105005005	0.546514081	0	0	--	-	-	-	-	-	-	-	-
GH1	ncbi_113808337	Ald	30.02435689	20.76159501	0.532216061	0	0	Ald	fructose 1,6-biphosphate-aldolase A [Fenneropenaeus chinensis]	Metabolism;Metabolism;Metabolism;Metabolism;Environmental Information Processing;Metabolism;Metabolism	Global and overview maps;Global and overview maps;Carbohydrate metabolism;Global and overview maps;Signal transduction;Carbohydrate metabolism;Carbohydrate metabolism	ko01100//Metabolic pathways;ko01200//Carbon metabolism;ko00010//Glycolysis / Gluconeogenesis;ko01230//Biosynthesis of amino acids;ko04066//HIF-1 signaling pathway;ko00051//Fructose and mannose metabolism;ko00030//Pentose phosphate pathway	K01623;K01623;K01623;K01623;K01623;K01623;K01623	-	-	-
GH1	ncbi_113806432	ncbi_113806432	2.972941437	2.058695843	0.530160347	0	0	--	-	-	-	-	-	-	-	-
GH1	ncbi_113806223	CG3792	4.533065578	3.213644031	0.496276899	0	0	CG3792	Mannose-P-dolichol utilization defect 1 protein [Anoplophora glabripennis]	-	-	-	-	-	-	-
GH1	ncbi_113828822	PyK	4.283604353	3.050930238	0.489576042	0	0	PyK	pyruvate kinase 3 [Litopenaeus vannamei]	Metabolism;Human Diseases;Metabolism;Metabolism;Human Diseases;Metabolism;Metabolism;Organismal Systems;Human Diseases;Metabolism;Human Diseases	Global and overview maps;Infectious diseases;Nucleotide metabolism;Global and overview maps;Cancers;Carbohydrate metabolism;Global and overview maps;Endocrine system;Cancers;Carbohydrate metabolism;Endocrine and metabolic diseases	ko01100//Metabolic pathways;ko05165//Human papillomavirus infection;ko00230//Purine metabolism;ko01200//Carbon metabolism;ko05203//Viral carcinogenesis;ko00010//Glycolysis / Gluconeogenesis;ko01230//Biosynthesis of amino acids;ko04922//Glucagon signaling pathway;ko05230//Central carbon metabolism in cancer;ko00620//Pyruvate metabolism;ko04930//Type II diabetes mellitus	K00873;K00873;K00873;K00873;K00873;K00873;K00873;K00873;K00873;K00873;K00873	-	-	-
GH1	ncbi_113807532	DFR	3.564099606	2.553332757	0.481156091	0	0	DFR	PREDICTED: cinnamoyl-CoA reductase 2-like [Parasteatoda tepidariorum]	-	-	-	-	-	-	-
GH1	ncbi_113808998	PEN-3	1.158470543	0.838102578	0.467022625	0	0	PEN-3	antimicrobial peptide penaeidin 3 [Litopenaeus stylirostris]	-	-	-	-	-	-	-
GH1	ncbi_113818927	Hsc70-3	9.667081784	6.995284801	0.466697652	0	0	Hsc70-3	Bip [Litopenaeus vannamei]	Genetic Information Processing;Organismal Systems;Human Diseases;Organismal Systems;Genetic Information Processing	Folding, sorting and degradation;Endocrine system;Neurodegenerative diseases;Immune system;Folding, sorting and degradation	ko04141//Protein processing in endoplasmic reticulum;ko04918//Thyroid hormone synthesis;ko05020//Prion diseases;ko04612//Antigen processing and presentation;ko03060//Protein export	K09490;K09490;K09490;K09490;K09490	-	GO:0016836//hydro-lyase activity;GO:0043169//cation binding	GO:0006778//porphyrin-containing compound metabolic process;GO:0018130//heterocycle biosynthetic process
GH1	ncbi_113807086	ncbi_113807086	7.803283451	5.701644909	0.452703113	0	0	--	IGF-binding protein, partial [Litopenaeus vannamei]	-	-	-	-	-	-	-
GH1	ncbi_113804897	ncbi_113804897	16.98998472	12.41909732	0.45212424	0	0	--	PREDICTED: migration and invasion enhancer 1-like isoform X1 [Hyalella azteca]	-	-	-	-	-	-	-
GH1	ncbi_113809546	ncbi_113809546	3.353500698	2.468632132	0.441956036	0	0	--	-	-	-	-	-	-	-	-
GH1	ncbi_113806297	cyn-5	37.47366213	27.88797471	0.426233806	0	0	cyn-5	PREDICTED: peptidyl-prolyl cis-trans isomerase 5 [Ceratitis capitata]	-	-	-	-	-	GO:0016859//cis-trans isomerase activity	GO:0044267//cellular protein metabolic process
GH1	ncbi_113830428	ncbi_113830428	3.919011721	2.996919073	0.387009761	0	0	--	rhodanese 1-like protein [Macrobrachium nipponense]	-	-	-	-	-	-	-
GH1	ncbi_113826825	ncbi_113826825	2.895745936	1.880477472	0.622836007	6.39E-307	1.71E-302	--	-	-	-	-	-	-	-	-
GH1	ncbi_113815329	Spon2	0.598207842	0.389939996	0.617394684	1.78E-302	4.76E-298	Spon2	PREDICTED: spondin-2-like [Hyalella azteca]	-	-	-	-	-	-	-
GH1	ncbi_113813586	Soat1	0.512380216	0.327609145	0.645239142	2.91E-292	7.79E-288	Soat1	PREDICTED: sterol O-acyltransferase 1-like [Hyalella azteca]	Organismal Systems;Metabolism	Digestive system;Lipid metabolism	ko04979//Cholesterol metabolism;ko00100//Steroid biosynthesis	K00637;K00637	-	-	-
GH1	ncbi_113809937	ncbi_113809937	0.438351984	0.202906694	1.11127332	3.20E-291	8.57E-287	--	-	-	-	-	-	-	-	-
GH1	ncbi_113828680	MP1	0.683165956	0.378916049	0.850357837	2.82E-286	7.56E-282	MP1	serine proteinase [Litopenaeus vannamei]	-	-	-	-	-	GO:0016787//hydrolase activity	-
GH1	ncbi_113826735	ncbi_113826735	0.451680243	0.263807352	0.775817037	3.17E-283	8.49E-279	--	PREDICTED: uncharacterized protein LOC108676220 [Hyalella azteca]	-	-	-	-	-	-	-
GH1	ncbi_113825364	Orct2	1.052223866	0.658330408	0.676557936	7.23E-281	1.94E-276	Orct2	PREDICTED: organic cation transporter protein-like [Hyalella azteca]	-	-	-	-	-	-	-
GH1	ncbi_113828089	ncbi_113828089	1.368870889	0.773053539	0.824346141	3.97E-276	1.06E-271	--	-	-	-	-	-	-	-	-
GH1	ncbi_113826664	ncbi_113826664	0.785454755	0.479088942	0.71323466	2.93E-268	7.86E-264	--	-	-	-	-	-	-	-	-
GH1	ncbi_113802736	CNPY2	1.88346313	1.234154225	0.609865102	8.91E-265	2.39E-260	CNPY2	PREDICTED: protein canopy homolog 2-like [Hyalella azteca]	-	-	-	-	-	-	-
GH1	ncbi_113827846	Sult1a1	1.186392554	0.685678396	0.790977475	1.85E-264	4.95E-260	Sult1a1	PREDICTED: sulfotransferase 1C4-like [Hyalella azteca]	-	-	-	-	-	-	-
GH1	ncbi_113804544	ncbi_113804544	1.088660021	0.781971578	0.477365407	1.10E-263	2.96E-259	--	PDGF/VEGF-related factor 1 [Eriocheir sinensis]	Human Diseases;Human Diseases;Cellular Processes;Human Diseases;Environmental Information Processing;Environmental Information Processing;Human Diseases;Human Diseases;Environmental Information Processing;Environmental Information Processing;Organismal Systems;Human Diseases;Environmental Information Processing;Human Diseases;Human Diseases;Human Diseases;Human Diseases;Human Diseases;Human Disea…	Cancers;Infectious diseases;Cellular community - eukaryotes;Cancers;Signal transduction;Signal transduction;Cardiovascular diseases;Cancers;Signal transduction;Signal transduction;Endocrine system;Infectious diseases;Signal transduction;Endocrine and metabolic diseases;Infectious diseases;Cancers;Cancers;Drug resistance;Immune diseases;Cancers;Signal transduction	ko05200//Pathways in cancer;ko05165//Human papillomavirus infection;ko04510//Focal adhesion;ko05205//Proteoglycans in cancer;ko04151//PI3K-Akt signaling pathway;ko04015//Rap1 signaling pathway;ko05418//Fluid shear stress and atherosclerosis;ko05206//MicroRNAs in cancer;ko04010//MAPK signaling pathway;ko04014//Ras signaling pathway;ko04926//Relaxin signaling pathway;ko05163//Human cytomegalovirus …	K05448;K05448;K05448;K05448;K05448;K05448;K05448;K05448;K05448;K05448;K05448;K05448;K05448;K05448;K05448;K05448;K05448;K05448;K05448;K05448;K05448	-	-	-
GH1	ncbi_113817991	ncbi_113817991	1.350132671	0.900656531	0.584052244	9.10E-262	2.44E-257	--	-	-	-	-	-	-	-	-
GH1	ncbi_113802157	PPP1R3C	0.399095813	0.229705625	0.796948954	2.16E-231	5.79E-227	PPP1R3C	PREDICTED: protein phosphatase 1 regulatory subunit 3B-like isoform X2 [Hyalella azteca]	Organismal Systems;Human Diseases	Endocrine system;Endocrine and metabolic diseases	ko04910//Insulin signaling pathway;ko04931//Insulin resistance	K07189;K07189	-	-	-
GH1	ncbi_113825838	SPCS1	4.54635491	3.533596712	0.363572917	9.95E-225	2.67E-220	SPCS1	PREDICTED: signal peptidase complex subunit 1-like [Hyalella azteca]	Genetic Information Processing	Folding, sorting and degradation	ko03060//Protein export	K12946	GO:0031224//intrinsic component of membrane	GO:0016787//hydrolase activity	GO:0016485//protein processing
GH1	ncbi_113810631	DNAJC3	0.985142294	0.638264775	0.626177094	1.29E-224	3.44E-220	DNAJC3	PREDICTED: dnaJ homolog subfamily C member 3-like [Hyalella azteca]	Genetic Information Processing;Human Diseases	Folding, sorting and degradation;Infectious diseases	ko04141//Protein processing in endoplasmic reticulum;ko05164//Influenza A	K09523;K09523	-	-	-
GH1	ncbi_113808319	Erap1	1.239592865	0.904581043	0.454544689	2.35E-222	6.28E-218	Erap1	PREDICTED: endoplasmic reticulum aminopeptidase 1 isoform X2 [Copidosoma floridanum]	Organismal Systems	Endocrine system	ko04614//Renin-angiotensin system	K11141	-	-	-
GH1	ncbi_113807706	MP1	1.823695865	1.368412047	0.414362444	4.56E-218	1.22E-213	MP1	clip domain serine proteinase 1 [Portunus trituberculatus]	-	-	-	-	-	-	-
GH1	ncbi_113804524	ncbi_113804524	1.066410893	0.71910333	0.568492426	5.35E-212	1.43E-207	--	-	-	-	-	-	-	-	-
GH1	ncbi_113811416	mthl1	0.595488451	0.404253519	0.558813195	1.59E-205	4.26E-201	mthl1	PREDICTED: G-protein coupled receptor Mth2-like isoform X2 [Hyalella azteca]	-	-	-	-	-	-	-
GH1	ncbi_113826021	ncbi_113826021	1.871790154	1.456426677	0.361985632	1.04E-197	2.80E-193	--	-	-	-	-	-	-	-	-
GH1	ncbi_113808654	PDE8B	0.620938829	0.419929874	0.564302724	5.74E-197	1.54E-192	PDE8B	PREDICTED: high affinity cAMP-specific and IBMX-insensitive 3',5'-cyclic phosphodiesterase 8B-like [Hyalella azteca]	Metabolism;Human Diseases;Human Diseases;Organismal Systems	Nucleotide metabolism;Endocrine and metabolic diseases;Substance dependence;Endocrine system	ko00230//Purine metabolism;ko04934//Cushing syndrome;ko05032//Morphine addiction;ko04927//Cortisol synthesis and secretion	K18437;K18437;K18437;K18437	-	GO:0016787//hydrolase activity	GO:0044707//single-multicellular organism process
GH1	ncbi_113810921	ncbi_113810921	1.160506528	0.812762388	0.513849092	4.93E-194	1.32E-189	--	-	-	-	-	-	-	-	-
GH1	ncbi_113825776	Pgk	2.495673016	1.924066691	0.375270118	1.92E-172	5.13E-168	Pgk	PREDICTED: phosphoglycerate kinase [Amyelois transitella]	Metabolism;Metabolism;Metabolism;Metabolism;Environmental Information Processing	Global and overview maps;Global and overview maps;Carbohydrate metabolism;Global and overview maps;Signal transduction	ko01100//Metabolic pathways;ko01200//Carbon metabolism;ko00010//Glycolysis / Gluconeogenesis;ko01230//Biosynthesis of amino acids;ko04066//HIF-1 signaling pathway	K00927;K00927;K00927;K00927;K00927	-	GO:0016772//transferase activity, transferring phosphorus-containing groups	GO:0006090//pyruvate metabolic process;GO:0006796//phosphate-containing compound metabolic process
GH1	ncbi_113804858	ncbi_113804858	0.458962289	0.287264869	0.675994048	5.71E-172	1.53E-167	--	-	-	-	-	-	-	-	-
GH1	ncbi_113809588	SLC31A1	0.596721285	0.371157409	0.68502607	1.46E-167	3.90E-163	SLC31A1	PREDICTED: high affinity copper uptake protein 1 isoform X1 [Polistes canadensis]	Human Diseases;Organismal Systems	Drug resistance;Digestive system	ko01524//Platinum drug resistance;ko04978//Mineral absorption	K14686;K14686	-	-	-
GH1	ncbi_113819923	Pgi	1.196174402	0.874065823	0.452613916	7.26E-166	1.94E-161	Pgi	glucose-6-phosphate isomerase [Spodoptera exigua]	Metabolism;Metabolism;Metabolism;Metabolism;Metabolism;Metabolism	Global and overview maps;Global and overview maps;Carbohydrate metabolism;Carbohydrate metabolism;Carbohydrate metabolism;Carbohydrate metabolism	ko01100//Metabolic pathways;ko01200//Carbon metabolism;ko00010//Glycolysis / Gluconeogenesis;ko00520//Amino sugar and nucleotide sugar metabolism;ko00500//Starch and sucrose metabolism;ko00030//Pentose phosphate pathway	K01810;K01810;K01810;K01810;K01810;K01810	-	-	-
GH1	ncbi_113817797	hyou1	1.8981098	1.470235322	0.368516362	7.71E-158	2.07E-153	hyou1	PREDICTED: hypoxia up-regulated protein 1 [Trichogramma pretiosum]	Genetic Information Processing	Folding, sorting and degradation	ko04141//Protein processing in endoplasmic reticulum	K09486	-	-	-
GH1	ncbi_113812037	ncbi_113812037	0.53347967	0.346090159	0.624285374	2.41E-156	6.44E-152	--	PREDICTED: SCO-spondin-like [Branchiostoma belcheri]	-	-	-	-	GO:0016020//membrane	GO:0005515//protein binding	GO:0050789//regulation of biological process
GH1	ncbi_113820234	ncbi_113820234	1.02437011	0.776531493	0.399620722	1.20E-153	3.21E-149	--	Leucine-rich repeat and immunoglobulin-like domain containing-NOGO receptor-interacting protein 4 [Zootermopsis nevadensis]	-	-	-	-	-	-	-
GH1	ncbi_113830543	SLC12A2	0.983542587	0.75295994	0.385414412	2.37E-152	6.36E-148	SLC12A2	Na+/K+/2Cl- cotransporter protein [Marsupenaeus japonicus]	Organismal Systems;Human Diseases;Organismal Systems	Digestive system;Infectious diseases;Digestive system	ko04972//Pancreatic secretion;ko05110//Vibrio cholerae infection;ko04970//Salivary secretion	K10951;K10951;K10951	-	-	-
GH1	ncbi_113811158	ncbi_113811158	1.685217429	1.302025591	0.372176937	2.37E-151	6.35E-147	--	-	-	-	-	-	-	-	-
GH1	ncbi_113810916	ncbi_113810916	0.654182532	0.476217986	0.458071127	4.48E-149	1.20E-144	--	PREDICTED: delta(7)-sterol 5(6)-desaturase erg32-like isoform X1 [Hyalella azteca]	-	-	-	-	-	-	-
GH1	ncbi_113808796	ncbi_113808796	1.021949065	0.78965705	0.372025164	3.30E-130	8.83E-126	--	-	-	-	-	-	-	-	-
GH1	ncbi_113803123	PGD	0.381014245	0.287351039	0.407030674	2.03E-105	5.43E-101	PGD	PREDICTED: 6-phosphogluconate dehydrogenase, decarboxylating isoform X1 [Strongylocentrotus purpuratus]	Metabolism;Metabolism;Metabolism;Metabolism	Global and overview maps;Global and overview maps;Metabolism of other amino acids;Carbohydrate metabolism	ko01100//Metabolic pathways;ko01200//Carbon metabolism;ko00480//Glutathione metabolism;ko00030//Pentose phosphate pathway	K00033;K00033;K00033;K00033	-	-	-
GH1	ncbi_113826667	ncbi_113826667	0.592123744	0.457012388	0.373665435	8.16E-93	2.18E-88	--	-	-	-	-	-	-	-	-
GH1	ncbi_113813488	ncbi_113813488	0.618658408	0.481967597	0.360206889	6.66E-87	1.78E-82	--	-	-	-	-	-	-	-	-
GH1	ncbi_113823673	PRDX6	1.476835837	1.1348499	0.380007974	8.57E-52	2.30E-47	PRDX6	peroxiredoxin 6 [Scylla paramamosain]	-	-	-	-	-	GO:0003824//catalytic activity;GO:0016209//antioxidant activity	GO:0044710//single-organism metabolic process
