# Supplementary material for: Single-cell RNA sequencing analysis of shrimp immune cells identifies macrophage-like phagocytes
Source: eLife. 2022 Oct 6;11:e80127. doi: 10.7554/eLife.80127 (PMC9584607; doi:10.7554/eLife.80127)
Supplement: Supplementary file 8. [file elife-80127-supp8.csv]

Target_Cluster	Gene ID	Gene Name	Target_Cluster_mean	Other_Cluster_mean	Log2FC	Pvalue	Qvalue	Symbol	Description	KEGG_A_class	KEGG_B_class	Pathway	K_ID	GO Component	GO Function	GO Process
0	ncbi_113809352	ncbi_113809352	129.9246736	14.0198539	3.212132214	0	0	--	single VWC domain protein 5 [Litopenaeus vannamei]	-	-	-	-	-	-	-
0	ncbi_113823524	ncbi_113823524	14.71757939	1.777757088	3.049410297	0	0	--	-	-	-	-	-	-	-	-
0	ncbi_113823118	thbs4	0.745236282	0.096017695	2.956325698	0	0	thbs4	PREDICTED: cartilage oligomeric matrix protein-like isoform X2 [Hyalella azteca]	Human Diseases;Cellular Processes;Cellular Processes;Environmental Information Processing;Environmental Information Processing;Human Diseases	Infectious diseases;Cellular community - eukaryotes;Transport and catabolism;Signal transduction;Signaling molecules and interaction;Infectious diseases	ko05165//Human papillomavirus infection;ko04510//Focal adhesion;ko04145//Phagosome;ko04151//PI3K-Akt signaling pathway;ko04512//ECM-receptor interaction;ko05144//Malaria	K04659;K04659;K04659;K04659;K04659;K04659	-	-	-
0	ncbi_113800108	ncbi_113800108	42.7023445	5.982054673	2.83560228	0	0	--	-	-	-	-	-	-	-	-
0	ncbi_113817695	ncbi_113817695	109.4133989	16.55904664	2.724097903	0	0	--	vascular endothelial growth factor 3 [Litopenaeus vannamei]	-	-	-	-	-	-	-
0	ncbi_113800109	ncbi_113800109	32.45222084	5.879066862	2.46465812	0	0	--	-	-	-	-	-	-	-	-
0	ncbi_113816490	ncbi_113816490	0.683796853	0.127139716	2.42715301	0	0	--	AAEL010263-PA [Aedes aegypti]	-	-	-	-	-	-	-
0	ncbi_113823512	ncbi_113823512	60.55306449	11.73474294	2.367413735	0	0	--	-	-	-	-	-	-	-	-
0	ncbi_113828560	Nlrp3	1.147154693	0.236557553	2.27779682	0	0	Nlrp3	PREDICTED: NLR family CARD domain-containing protein 4-like [Lingula anatina]	-	-	-	-	-	-	-
0	ncbi_113823500	ncbi_113823500	39.8610018	9.295417971	2.100386326	0	0	--	-	-	-	-	-	-	-	-
0	ncbi_113816639	ncbi_113816639	1.202446461	0.285068768	2.076590768	0	0	--	-	-	-	-	-	-	-	-
0	ncbi_113800107	ncbi_113800107	63.54637408	15.95942627	1.993401019	0	0	--	-	-	-	-	-	-	-	-
0	ncbi_113830149	ncbi_113830149	3.360227378	0.914274174	1.877860087	0	0	--	hypothetical ferritin light-chain subunit, partial [Rimicaris exoculata]	-	-	-	-	-	-	-
0	ncbi_113802107	ncbi_113802107	1.113150694	0.345033563	1.689840301	0	0	--	Ubiquitin [Zootermopsis nevadensis]	Organismal Systems	Endocrine system	ko03320//PPAR signaling pathway	K08770	-	-	-
0	ncbi_113810268	nrv2	3.828292338	1.249630973	1.615198885	0	0	nrv2	sodium potassium-transporting ATPase subunit beta [Litopenaeus vannamei]	Organismal Systems;Organismal Systems;Environmental Information Processing;Organismal Systems;Environmental Information Processing;Organismal Systems;Organismal Systems;Organismal Systems;Organismal Systems;Organismal Systems;Organismal Systems;Organismal Systems;Organismal Systems;Organismal Systems;Organismal Systems;Organismal Systems;Organismal Systems;Organismal Systems	Endocrine system;Digestive system;Signal transduction;Circulatory system;Signal transduction;Digestive system;Digestive system;Circulatory system;Digestive system;Digestive system;Endocrine system;Endocrine system;Endocrine system;Digestive system;Excretory system;Excretory system;Digestive system;Excretory system	ko04919//Thyroid hormone signaling pathway;ko04972//Pancreatic secretion;ko04022//cGMP - PKG signaling pathway;ko04261//Adrenergic signaling in cardiomyocytes;ko04024//cAMP signaling pathway;ko04971//Gastric acid secretion;ko04974//Protein digestion and absorption;ko04260//Cardiac muscle contraction;ko04976//Bile secretion;ko04970//Salivary secretion;ko04911//Insulin secretion;ko04918//Thyroid ho…	K01540;K01540;K01540;K01540;K01540;K01540;K01540;K01540;K01540;K01540;K01540;K01540;K01540;K01540;K01540;K01540;K01540;K01540	-	-	-
0	ncbi_113805238	Drice	4.381705982	1.446428811	1.598997361	0	0	Drice	CAP-3 [Litopenaeus vannamei]	Human Diseases;Cellular Processes;Human Diseases;Cellular Processes;Human Diseases;Environmental Information Processing;Cellular Processes;Human Diseases;Human Diseases	Cancers;Cell growth and death;Neurodegenerative diseases;Cell growth and death;Endocrine and metabolic diseases;Signal transduction;Cell growth and death;Infectious diseases;Infectious diseases	ko05200//Pathways in cancer;ko04210//Apoptosis;ko05010//Alzheimer disease;ko04214//Apoptosis - fly;ko04932//Non-alcoholic fatty liver disease (NAFLD);ko04668//TNF signaling pathway;ko04215//Apoptosis - multiple species;ko05134//Legionellosis;ko05133//Pertussis	K04397;K04397;K04397;K04397;K04397;K04397;K04397;K04397;K04397	-	-	-
0	ncbi_113802295	Lyz1	26.30134816	8.709840209	1.594418595	0	0	Lyz1	lysozyme [Litopenaeus vannamei]	Organismal Systems	Digestive system	ko04970//Salivary secretion	K13915	-	-	-
0	ncbi_113827852	SULT1C4	9.842388328	3.310705735	1.571869653	0	0	SULT1C4	Sulfotransferase sult [Daphnia magna]	-	-	-	-	-	-	-
0	ncbi_113820575	ncbi_113820575	15.09985809	5.484121945	1.461202434	0	0	--	PREDICTED: uncharacterized protein LOC108681463 [Hyalella azteca]	-	-	-	-	-	-	-
0	ncbi_113823707	ncbi_113823707	0.98322997	0.363345787	1.436185711	0	0	--	-	-	-	-	-	-	-	-
0	ncbi_113817672	Tinagl1	11.71712864	4.369227572	1.423168916	0	0	Tinagl1	PREDICTED: tubulointerstitial nephritis antigen-like [Thamnophis sirtalis]	-	-	-	-	GO:0044421//extracellular region part	-	-
0	ncbi_113824472	ncbi_113824472	5.67081072	2.168421107	1.386910048	0	0	--	-	-	-	-	-	-	-	-
0	ncbi_113820498	ncbi_113820498	2.3932938	0.944116148	1.341961252	0	0	--	-	-	-	-	-	-	-	-
0	ncbi_113804553	ncbi_113804553	7.791137082	3.075706444	1.340916085	0	0	--	C-type lectin 2 [Marsupenaeus japonicus]	-	-	-	-	-	-	-
0	ncbi_113827364	ncbi_113827364	16.54201147	6.836309963	1.274844957	0	0	--	PREDICTED: protein NPC2 homolog [Trachymyrmex zeteki]	-	-	-	-	-	-	-
0	ncbi_113823075	ncbi_113823075	16.967981	7.089116397	1.259137188	0	0	--	C-type lectin 2 [Marsupenaeus japonicus]	-	-	-	-	-	-	-
0	ncbi_113803783	ncbi_113803783	26.68494425	11.22202317	1.249693201	0	0	--	-	-	-	-	-	-	-	-
0	ncbi_113802824	ncbi_113802824	1.67197634	0.747187138	1.162012905	0	0	--	-	-	-	-	-	-	-	-
0	ncbi_113805200	ncbi_113805200	1.594895766	0.713107312	1.161271038	0	0	--	-	-	-	-	-	-	-	-
0	ncbi_113816494	TAGLN2	18.26466944	8.227799808	1.150477047	0	0	TAGLN2	PREDICTED: myophilin isoform X1 [Cephus cinctus]	-	-	-	-	-	-	-
0	ncbi_113818299	ncbi_113818299	1.691766165	0.771237903	1.133282313	0	0	--	farnesoic acid O-methyltransferase [Litopenaeus vannamei]	-	-	-	-	-	-	-
0	ncbi_113802927	ncbi_113802927	1.471399354	0.674321577	1.125680196	0	0	--	Zinc-type alcohol dehydrogenase-like protein [Zootermopsis nevadensis]	-	-	-	-	-	-	-
0	ncbi_113811918	ncbi_113811918	0.956097402	0.44589923	1.100439892	0	0	--	PREDICTED: galactose-specific lectin nattectin-like [Hyalella azteca]	-	-	-	-	-	-	-
0	ncbi_113809200	ncbi_113809200	0.971079134	0.455811661	1.091151034	0	0	--	transient receptor potential cation channel pyrexia [Homarus americanus]	-	-	-	-	-	-	-
0	ncbi_113800918	fax	3.1611806	1.492047896	1.083169611	0	0	fax	PREDICTED: failed axon connections-like isoform X1 [Hyalella azteca]	-	-	-	-	-	-	-
0	ncbi_113812172	ncbi_113812172	4.735686758	2.36569565	1.001309176	0	0	--	-	-	-	-	-	-	-	-
0	ncbi_113822916	ncbi_113822916	9.619691269	4.810684763	0.999748328	0	0	--	-	-	-	-	-	-	-	-
0	ncbi_113816366	AK	27.12870216	13.94369158	0.960207466	0	0	AK	arginine kinase, partial [Metapenaeus ensis]	Metabolism;Metabolism	Global and overview maps;Amino acid metabolism	ko01100//Metabolic pathways;ko00330//Arginine and proline metabolism	K00933;K00933	-	-	-
0	ncbi_113822048	ncbi_113822048	1.633863419	0.848560995	0.945197117	0	0	--	PREDICTED: innexin inx2-like [Hyalella azteca]	-	-	-	-	-	-	-
0	ncbi_113800820	alphaTub85E	3.298732611	1.773984996	0.894918033	0	0	alphaTub85E	PREDICTED: tubulin alpha-8 chain-like [Hyalella azteca]	Cellular Processes;Cellular Processes;Cellular Processes;Human Diseases;Cellular Processes	Transport and catabolism;Cellular community - eukaryotes;Cell growth and death;Infectious diseases;Cellular community - eukaryotes	ko04145//Phagosome;ko04530//Tight junction;ko04210//Apoptosis;ko05130//Pathogenic Escherichia coli infection;ko04540//Gap junction	K07374;K07374;K07374;K07374;K07374	GO:0015630//microtubule cytoskeleton;GO:0031224//intrinsic component of membrane;GO:0043234//protein complex	GO:0005198//structural molecule activity;GO:0015405//P-P-bond-hydrolysis-driven transmembrane transporter activity;GO:0017111//nucleoside-triphosphatase activity;GO:0032550//purine ribonucleoside binding	GO:0007051//spindle organization;GO:0043623//cellular protein complex assembly;GO:0051234//establishment of localization;GO:0071173//spindle assembly checkpoint
0	ncbi_113814356	omt6	2.729231113	1.476165205	0.886640378	0	0	omt6	O-methyltransferase [Litopenaeus vannamei]	-	-	-	-	-	-	-
0	ncbi_113815645	SDHC	3.537884261	1.924704268	0.87825006	0	0	SDHC	PREDICTED: succinate dehydrogenase cytochrome b560 subunit, mitochondrial-like [Limulus polyphemus]	Metabolism;Organismal Systems;Human Diseases;Metabolism;Human Diseases;Human Diseases;Human Diseases;Metabolism;Metabolism	Global and overview maps;Environmental adaptation;Neurodegenerative diseases;Global and overview maps;Neurodegenerative diseases;Endocrine and metabolic diseases;Neurodegenerative diseases;Energy metabolism;Carbohydrate metabolism	ko01100//Metabolic pathways;ko04714//Thermogenesis;ko05016//Huntington disease;ko01200//Carbon metabolism;ko05010//Alzheimer disease;ko04932//Non-alcoholic fatty liver disease (NAFLD);ko05012//Parkinson disease;ko00190//Oxidative phosphorylation;ko00020//Citrate cycle (TCA cycle)	K00236;K00236;K00236;K00236;K00236;K00236;K00236;K00236;K00236	-	-	-
0	ncbi_113822332	ncbi_113822332	1.085337185	0.607720277	0.836663986	0	0	--	-	-	-	-	-	-	-	-
0	ncbi_113800437	DBI	23.32144974	13.18614603	0.82263451	0	0	DBI	acyl-CoA-binding protein [Fenneropenaeus chinensis]	Organismal Systems	Endocrine system	ko03320//PPAR signaling pathway	K08762	GO:0031988//membrane-bounded vesicle;GO:0044432//endoplasmic reticulum part	GO:0000062//fatty-acyl-CoA binding;GO:0005515//protein binding	GO:0002209//behavioral defense response;GO:0006639//acylglycerol metabolic process;GO:0044708//single-organism behavior;GO:0046470//phosphatidylcholine metabolic process;GO:0048167//regulation of synaptic plasticity;GO:0048513//animal organ development
0	ncbi_113805784	ncbi_113805784	18.98076061	10.73702927	0.821942923	0	0	--	hypothetical protein [Scylla paramamosain]	-	-	-	-	-	-	-
0	ncbi_113809138	Nme1	55.08610374	31.35602984	0.812945521	0	0	Nme1	nm23 [Macrobrachium rosenbergii]	Metabolism;Metabolism;Metabolism;Metabolism	Global and overview maps;Nucleotide metabolism;Xenobiotics biodegradation and metabolism;Nucleotide metabolism	ko01100//Metabolic pathways;ko00230//Purine metabolism;ko00983//Drug metabolism - other enzymes;ko00240//Pyrimidine metabolism	K00940;K00940;K00940;K00940	-	GO:0016776//phosphotransferase activity, phosphate group as acceptor;GO:0032550//purine ribonucleoside binding	GO:0009132//nucleoside diphosphate metabolic process;GO:0009152//purine ribonucleotide biosynthetic process;GO:0009209//pyrimidine ribonucleoside triphosphate biosynthetic process
0	ncbi_113815675	DBI	5.53767869	3.188204776	0.796537052	0	0	DBI	acyl-CoA-binding protein [Fenneropenaeus chinensis]	Organismal Systems	Endocrine system	ko03320//PPAR signaling pathway	K08762	GO:0031988//membrane-bounded vesicle;GO:0044432//endoplasmic reticulum part	GO:0000062//fatty-acyl-CoA binding;GO:0005515//protein binding	GO:0002209//behavioral defense response;GO:0006639//acylglycerol metabolic process;GO:0044708//single-organism behavior;GO:0046470//phosphatidylcholine metabolic process;GO:0048167//regulation of synaptic plasticity;GO:0048513//animal organ development
0	ncbi_113821440	fth1-a	11.07803283	6.392610329	0.793224659	0	0	fth1-a	ferritin [Litopenaeus vannamei]	Cellular Processes;Organismal Systems;Cellular Processes	Cell growth and death;Digestive system;Cell growth and death	ko04217//Necroptosis;ko04978//Mineral absorption;ko04216//Ferroptosis	K00522;K00522;K00522	-	-	-
0	ncbi_113800860	Inx3	10.10490297	5.838506892	0.791384094	0	0	Inx3	innexin 7 [Homarus americanus]	-	-	-	-	-	-	-
0	ncbi_113807833	PRDX5	2.140259708	1.236690701	0.791301146	0	0	PRDX5	peroxiredoxin-5 [Palaemon carinicauda]	Cellular Processes	Transport and catabolism	ko04146//Peroxisome	K11187	-	-	-
0	ncbi_113810722	AGAP006782	37.04226992	21.51076871	0.784113427	0	0	AGAP006782	adenine nucleotide translocase 2 [Litopenaeus vannamei]	Human Diseases;Human Diseases;Human Diseases;Environmental Information Processing;Cellular Processes;Human Diseases;Environmental Information Processing;Cellular Processes	Neurodegenerative diseases;Infectious diseases;Infectious diseases;Signal transduction;Cell growth and death;Neurodegenerative diseases;Signal transduction;Cell growth and death	ko05016//Huntington disease;ko05164//Influenza A;ko05166//HTLV-I infection;ko04022//cGMP - PKG signaling pathway;ko04217//Necroptosis;ko05012//Parkinson disease;ko04020//Calcium signaling pathway;ko04218//Cellular senescence	K05863;K05863;K05863;K05863;K05863;K05863;K05863;K05863	-	-	-
0	ncbi_113809880	NPM3	2.802116046	1.650577689	0.76354566	0	0	NPM3	PREDICTED: nucleoplasmin-like protein ANO39 isoform X2 [Hyalella azteca]	-	-	-	-	-	-	-
0	ncbi_113803689	ncbi_113803689	2.519592533	1.497677036	0.750463891	0	0	--	PREDICTED: poly [ADP-ribose] polymerase 3-like [Sinocyclocheilus rhinocerous]	Cellular Processes;Cellular Processes;Cellular Processes;Organismal Systems;Genetic Information Processing;Environmental Information Processing	Cell growth and death;Cell growth and death;Cell growth and death;Aging;Replication and repair;Signal transduction	ko04210//Apoptosis;ko04217//Necroptosis;ko04214//Apoptosis - fly;ko04212//Longevity regulating pathway - worm;ko03410//Base excision repair;ko04064//NF-kappa B signaling pathway	K10798;K10798;K10798;K10798;K10798;K10798	-	-	-
0	ncbi_113821743	Pa2g4	5.531402391	3.295588763	0.747109069	0	0	Pa2g4	PREDICTED: proliferation-associated protein 2G4 isoform X2 [Cimex lectularius]	-	-	-	-	-	-	-
0	ncbi_113807065	sdn-1	10.13718517	6.068629622	0.740214431	0	0	sdn-1	syndecan precursor [Litopenaeus vannamei]	Human Diseases;Human Diseases;Environmental Information Processing;Human Diseases	Cancers;Cardiovascular diseases;Signaling molecules and interaction;Infectious diseases	ko05205//Proteoglycans in cancer;ko05418//Fluid shear stress and atherosclerosis;ko04514//Cell adhesion molecules (CAMs);ko05144//Malaria	K16336;K16336;K16336;K16336	-	-	-
0	ncbi_113812130	4CL5	2.285398558	1.377362	0.730538004	0	0	4CL5	PREDICTED: 4-coumarate--CoA ligase 1 isoform X1 [Strongylocentrotus purpuratus]	Metabolism;Metabolism;Metabolism	Global and overview maps;Amino acid metabolism;Metabolism of cofactors and vitamins	ko01100//Metabolic pathways;ko00360//Phenylalanine metabolism;ko00130//Ubiquinone and other terpenoid-quinone biosynthesis	K01904;K01904;K01904	-	-	-
0	ncbi_113820488	ncbi_113820488	2.143069276	1.293403584	0.728505974	0	0	--	PREDICTED: keratin, type I cytoskeletal 9-like [Hyalella azteca]	-	-	-	-	-	-	-
0	ncbi_113830022	TUFM	2.555081624	1.543062599	0.727572789	0	0	TUFM	PREDICTED: elongation factor Tu, mitochondrial [Drosophila navojoa]	-	-	-	-	GO:0043231//intracellular membrane-bounded organelle	GO:0008135//translation factor activity, RNA binding;GO:0017111//nucleoside-triphosphatase activity;GO:0032550//purine ribonucleoside binding	GO:0006996//organelle organization;GO:0007049//cell cycle;GO:0034645//cellular macromolecule biosynthetic process
0	ncbi_113810980	ncbi_113810980	4.175570454	2.525064245	0.725653213	0	0	--	mitochondrial ATPase inhibitor factor 1 precursor [Litopenaeus vannamei]	-	-	-	-	-	-	-
0	ncbi_113812068	ncbi_113812068	3.893946963	2.357386528	0.724044905	0	0	--	-	-	-	-	-	-	-	-
0	ncbi_113807311	NDUFA2	1.750582761	1.060396491	0.723231467	0	0	NDUFA2	PREDICTED: NADH dehydrogenase [ubiquinone] 1 alpha subcomplex subunit 2 [Stegastes partitus]	Metabolism;Organismal Systems;Human Diseases;Human Diseases;Human Diseases;Human Diseases;Metabolism;Organismal Systems	Global and overview maps;Environmental adaptation;Neurodegenerative diseases;Neurodegenerative diseases;Endocrine and metabolic diseases;Neurodegenerative diseases;Energy metabolism;Nervous system	ko01100//Metabolic pathways;ko04714//Thermogenesis;ko05016//Huntington disease;ko05010//Alzheimer disease;ko04932//Non-alcoholic fatty liver disease (NAFLD);ko05012//Parkinson disease;ko00190//Oxidative phosphorylation;ko04723//Retrograde endocannabinoid signaling	K03946;K03946;K03946;K03946;K03946;K03946;K03946;K03946	GO:0019866//organelle inner membrane;GO:0031966//mitochondrial membrane;GO:0044425//membrane part	-	GO:0044710//single-organism metabolic process
0	ncbi_113820330	Pcd	7.184626529	4.376388163	0.715172461	0	0	Pcd	pterin 4alpha-carbinolamine dehydratase [Drosophila virilis]	Metabolism;Metabolism	Global and overview maps;Metabolism of cofactors and vitamins	ko01100//Metabolic pathways;ko00790//Folate biosynthesis	K01724;K01724	-	-	-
0	ncbi_113822871	ncbi_113822871	6.974481767	4.257975878	0.711918246	0	0	--	PREDICTED: adenylate cyclase type 8-like isoform X7 [Apis dorsata]	-	-	-	-	-	-	-
0	ncbi_113818380	MCTS1	3.115932738	1.922715469	0.696518808	0	0	MCTS1	mct-1 protein [Pararge aegeria]	-	-	-	-	-	-	-
0	ncbi_113805854	blw	5.353688187	3.318883938	0.689834936	0	0	blw	mitochondrial ATP synthase subunit alpha precursor [Litopenaeus vannamei]	Metabolism;Organismal Systems;Human Diseases;Human Diseases;Human Diseases;Metabolism	Global and overview maps;Environmental adaptation;Neurodegenerative diseases;Neurodegenerative diseases;Neurodegenerative diseases;Energy metabolism	ko01100//Metabolic pathways;ko04714//Thermogenesis;ko05016//Huntington disease;ko05010//Alzheimer disease;ko05012//Parkinson disease;ko00190//Oxidative phosphorylation	K02132;K02132;K02132;K02132;K02132;K02132	GO:0033178//proton-transporting two-sector ATPase complex, catalytic domain	GO:0015078//hydrogen ion transmembrane transporter activity;GO:0019829//cation-transporting ATPase activity;GO:0032550//purine ribonucleoside binding	GO:0006754//ATP biosynthetic process;GO:0015988//energy coupled proton transmembrane transport, against electrochemical gradient
0	ncbi_113812069	ncbi_113812069	4.390352942	2.740720478	0.679781726	0	0	--	-	-	-	-	-	-	-	-
0	ncbi_113818783	Atp5mc2	67.75560845	42.39520988	0.676439102	0	0	Atp5mc2	ATP synthase subunit 9 mitochondrial precursor [Litopenaeus vannamei]	Metabolism;Organismal Systems;Human Diseases;Human Diseases;Human Diseases;Metabolism	Global and overview maps;Environmental adaptation;Neurodegenerative diseases;Neurodegenerative diseases;Neurodegenerative diseases;Energy metabolism	ko01100//Metabolic pathways;ko04714//Thermogenesis;ko05016//Huntington disease;ko05010//Alzheimer disease;ko05012//Parkinson disease;ko00190//Oxidative phosphorylation	K02128;K02128;K02128;K02128;K02128;K02128	-	-	-
0	ncbi_113811052	ATP5F1D	3.219152522	2.017450601	0.674147584	0	0	ATP5F1D	mitochondrial ATP synthase delta subunit precursor [Litopenaeus vannamei]	Metabolism;Organismal Systems;Human Diseases;Human Diseases;Human Diseases;Metabolism	Global and overview maps;Environmental adaptation;Neurodegenerative diseases;Neurodegenerative diseases;Neurodegenerative diseases;Energy metabolism	ko01100//Metabolic pathways;ko04714//Thermogenesis;ko05016//Huntington disease;ko05010//Alzheimer disease;ko05012//Parkinson disease;ko00190//Oxidative phosphorylation	K02134;K02134;K02134;K02134;K02134;K02134	GO:0033178//proton-transporting two-sector ATPase complex, catalytic domain	GO:0015078//hydrogen ion transmembrane transporter activity;GO:0019829//cation-transporting ATPase activity	-
0	ncbi_113816095	TUBB4B	16.39437163	10.36098627	0.662039265	0	0	TUBB4B	beta-I tubulin [Homarus americanus]	Cellular Processes;Human Diseases;Cellular Processes	Transport and catabolism;Infectious diseases;Cellular community - eukaryotes	ko04145//Phagosome;ko05130//Pathogenic Escherichia coli infection;ko04540//Gap junction	K07375;K07375;K07375	GO:0015630//microtubule cytoskeleton;GO:0032991//macromolecular complex	GO:0005198//structural molecule activity;GO:0017111//nucleoside-triphosphatase activity;GO:0032550//purine ribonucleoside binding	GO:0043623//cellular protein complex assembly;GO:0044763//single-organism cellular process
0	ncbi_113810740	ncbi_113810740	4.083751538	2.582066312	0.661369041	0	0	--	-	-	-	-	-	-	-	-
0	ncbi_113826188	Nacalpha	13.07835483	8.281025411	0.659299743	0	0	Nacalpha	nascent polypeptide-associated complex alpha [Penaeus monodon]	-	-	-	-	-	-	-
0	ncbi_113824335	btf3l4	3.640033465	2.314137257	0.653477277	0	0	btf3l4	PREDICTED: transcription factor BTF3 homolog 4-like [Limulus polyphemus]	Cellular Processes	Cell growth and death	ko04214//Apoptosis - fly	K01527	-	-	-
0	ncbi_113811537	MDH2	6.739800477	4.298533866	0.648861211	0	0	MDH2	malate dehydrogenase [Macrobrachium nipponense]	Metabolism;Metabolism;Metabolism;Metabolism;Metabolism;Metabolism	Global and overview maps;Global and overview maps;Carbohydrate metabolism;Amino acid metabolism;Carbohydrate metabolism;Carbohydrate metabolism	ko01100//Metabolic pathways;ko01200//Carbon metabolism;ko00020//Citrate cycle (TCA cycle);ko00270//Cysteine and methionine metabolism;ko00620//Pyruvate metabolism;ko00630//Glyoxylate and dicarboxylate metabolism	K00026;K00026;K00026;K00026;K00026;K00026	-	GO:0016615//malate dehydrogenase activity	GO:0005975//carbohydrate metabolic process;GO:0006101//citrate metabolic process;GO:0043648//dicarboxylic acid metabolic process
0	ncbi_113830605	ND-ACP	4.712143437	3.00763288	0.647754977	0	0	ND-ACP	mitochondrial acyl carrier protein [Artemia franciscana]	Metabolism;Organismal Systems;Human Diseases;Human Diseases;Human Diseases;Human Diseases;Metabolism;Organismal Systems	Global and overview maps;Environmental adaptation;Neurodegenerative diseases;Neurodegenerative diseases;Endocrine and metabolic diseases;Neurodegenerative diseases;Energy metabolism;Nervous system	ko01100//Metabolic pathways;ko04714//Thermogenesis;ko05016//Huntington disease;ko05010//Alzheimer disease;ko04932//Non-alcoholic fatty liver disease (NAFLD);ko05012//Parkinson disease;ko00190//Oxidative phosphorylation;ko04723//Retrograde endocannabinoid signaling	K03955;K03955;K03955;K03955;K03955;K03955;K03955;K03955	-	-	-
0	ncbi_113818230	Ube2g1	3.639526849	2.327659957	0.644870594	0	0	Ube2g1	ubiquitin-conjugating enzyme E2 G1 [Penaeus monodon]	Genetic Information Processing;Genetic Information Processing;Human Diseases	Folding, sorting and degradation;Folding, sorting and degradation;Neurodegenerative diseases	ko04141//Protein processing in endoplasmic reticulum;ko04120//Ubiquitin mediated proteolysis;ko05012//Parkinson disease	K10575;K10575;K10575	-	GO:0019787//ubiquitin-like protein transferase activity	GO:0016567//protein ubiquitination
0	ncbi_113803433	NDUFB3	4.969712411	3.186383129	0.641242622	0	0	NDUFB3	NADH dehydrogenase [Palaemon varians]	Metabolism;Organismal Systems;Human Diseases;Human Diseases;Human Diseases;Human Diseases;Metabolism;Organismal Systems	Global and overview maps;Environmental adaptation;Neurodegenerative diseases;Neurodegenerative diseases;Endocrine and metabolic diseases;Neurodegenerative diseases;Energy metabolism;Nervous system	ko01100//Metabolic pathways;ko04714//Thermogenesis;ko05016//Huntington disease;ko05010//Alzheimer disease;ko04932//Non-alcoholic fatty liver disease (NAFLD);ko05012//Parkinson disease;ko00190//Oxidative phosphorylation;ko04723//Retrograde endocannabinoid signaling	K03959;K03959;K03959;K03959;K03959;K03959;K03959;K03959	-	-	-
0	ncbi_113809388	SLC25A3	6.626281646	4.249511067	0.640902666	0	0	SLC25A3	PREDICTED: phosphate carrier protein, mitochondrial-like [Hyalella azteca]	-	-	-	-	GO:0019866//organelle inner membrane;GO:0031224//intrinsic component of membrane;GO:0031988//membrane-bounded vesicle	GO:0005515//protein binding	GO:0044763//single-organism cellular process;GO:0051234//establishment of localization
0	ncbi_113800033	Cox5a	13.97853006	8.983788716	0.637816756	0	0	Cox5a	mitochondrial cytochrome c oxidase subunit Va [Litopenaeus vannamei]	Metabolism;Organismal Systems;Human Diseases;Human Diseases;Human Diseases;Human Diseases;Metabolism;Organismal Systems	Global and overview maps;Environmental adaptation;Neurodegenerative diseases;Neurodegenerative diseases;Endocrine and metabolic diseases;Neurodegenerative diseases;Energy metabolism;Circulatory system	ko01100//Metabolic pathways;ko04714//Thermogenesis;ko05016//Huntington disease;ko05010//Alzheimer disease;ko04932//Non-alcoholic fatty liver disease (NAFLD);ko05012//Parkinson disease;ko00190//Oxidative phosphorylation;ko04260//Cardiac muscle contraction	K02264;K02264;K02264;K02264;K02264;K02264;K02264;K02264	GO:0019866//organelle inner membrane	GO:0003824//catalytic activity	GO:0015992//proton transport;GO:0044710//single-organism metabolic process
0	ncbi_113809655	La	5.823205071	3.760925783	0.630725589	0	0	La	PREDICTED: la protein homolog [Hyalella azteca]	-	-	-	-	-	-	-
0	ncbi_113810113	ATPsynB	5.500496756	3.557024433	0.628891032	0	0	ATPsynB	F0-ATP synthase b-chain [Litopenaeus vannamei]	Metabolism;Organismal Systems;Human Diseases;Human Diseases;Human Diseases;Metabolism	Global and overview maps;Environmental adaptation;Neurodegenerative diseases;Neurodegenerative diseases;Neurodegenerative diseases;Energy metabolism	ko01100//Metabolic pathways;ko04714//Thermogenesis;ko05016//Huntington disease;ko05010//Alzheimer disease;ko05012//Parkinson disease;ko00190//Oxidative phosphorylation	K02127;K02127;K02127;K02127;K02127;K02127	-	-	-
0	ncbi_113820297	Ndufa5	2.416509227	1.577044983	0.615700692	0	0	Ndufa5	NADH dehydrogenase [ubiquinone] 1 alpha subcomplex subunit 5 [Danio rerio]	Metabolism;Organismal Systems;Human Diseases;Human Diseases;Human Diseases;Human Diseases;Metabolism;Organismal Systems	Global and overview maps;Environmental adaptation;Neurodegenerative diseases;Neurodegenerative diseases;Endocrine and metabolic diseases;Neurodegenerative diseases;Energy metabolism;Nervous system	ko01100//Metabolic pathways;ko04714//Thermogenesis;ko05016//Huntington disease;ko05010//Alzheimer disease;ko04932//Non-alcoholic fatty liver disease (NAFLD);ko05012//Parkinson disease;ko00190//Oxidative phosphorylation;ko04723//Retrograde endocannabinoid signaling	K03949;K03949;K03949;K03949;K03949;K03949;K03949;K03949	GO:0019866//organelle inner membrane	GO:0016491//oxidoreductase activity	GO:0022900//electron transport chain
0	ncbi_113811885	IDH1	2.315720537	1.518112762	0.609182204	0	0	IDH1	PREDICTED: isocitrate dehydrogenase [NADP] cytoplasmic-like [Lingula anatina]	Metabolism;Metabolism;Metabolism;Cellular Processes;Metabolism;Human Diseases;Metabolism;Metabolism	Global and overview maps;Global and overview maps;Metabolism of other amino acids;Transport and catabolism;Global and overview maps;Cancers;Carbohydrate metabolism;Global and overview maps	ko01100//Metabolic pathways;ko01200//Carbon metabolism;ko00480//Glutathione metabolism;ko04146//Peroxisome;ko01230//Biosynthesis of amino acids;ko05230//Central carbon metabolism in cancer;ko00020//Citrate cycle (TCA cycle);ko01210//2-Oxocarboxylic acid metabolism	K00031;K00031;K00031;K00031;K00031;K00031;K00031;K00031	-	-	-
0	ncbi_113827328	PFDN4	4.391987037	2.883584594	0.60701045	0	0	PFDN4	PREDICTED: prefoldin subunit 4-like [Hyalella azteca]	-	-	-	-	-	-	-
0	ncbi_113803509	ncbi_113803509	2.209923184	1.454143879	0.6038262	0	0	--	PREDICTED: NADH dehydrogenase [ubiquinone] 1 alpha subcomplex subunit 11 [Bactrocera cucurbitae]	Metabolism;Organismal Systems;Human Diseases;Human Diseases;Human Diseases;Human Diseases;Metabolism;Organismal Systems	Global and overview maps;Environmental adaptation;Neurodegenerative diseases;Neurodegenerative diseases;Endocrine and metabolic diseases;Neurodegenerative diseases;Energy metabolism;Nervous system	ko01100//Metabolic pathways;ko04714//Thermogenesis;ko05016//Huntington disease;ko05010//Alzheimer disease;ko04932//Non-alcoholic fatty liver disease (NAFLD);ko05012//Parkinson disease;ko00190//Oxidative phosphorylation;ko04723//Retrograde endocannabinoid signaling	K03956;K03956;K03956;K03956;K03956;K03956;K03956;K03956	-	-	-
0	ncbi_113812454	mRpS25	2.663480115	1.753158074	0.603356427	0	0	mRpS25	mitochondrial ribosomal protein S25 [Riptortus pedestris]	-	-	-	-	-	-	-
0	ncbi_113820864	Uqcrq	3.395313541	2.239426191	0.600415689	0	0	Uqcrq	PREDICTED: cytochrome b-c1 complex subunit 8 [Amyelois transitella]	Metabolism;Organismal Systems;Human Diseases;Human Diseases;Human Diseases;Human Diseases;Metabolism;Organismal Systems	Global and overview maps;Environmental adaptation;Neurodegenerative diseases;Neurodegenerative diseases;Endocrine and metabolic diseases;Neurodegenerative diseases;Energy metabolism;Circulatory system	ko01100//Metabolic pathways;ko04714//Thermogenesis;ko05016//Huntington disease;ko05010//Alzheimer disease;ko04932//Non-alcoholic fatty liver disease (NAFLD);ko05012//Parkinson disease;ko00190//Oxidative phosphorylation;ko04260//Cardiac muscle contraction	K00418;K00418;K00418;K00418;K00418;K00418;K00418;K00418	-	-	GO:0044699//single-organism process
0	ncbi_113816963	NDUFS7	3.108007211	2.050076203	0.600312314	0	0	NDUFS7	NADH dehydrogenase [ubiquinone] iron-sulfur protein 7, mitochondrial [Daphnia magna]	Metabolism;Organismal Systems;Human Diseases;Human Diseases;Human Diseases;Human Diseases;Metabolism;Organismal Systems	Global and overview maps;Environmental adaptation;Neurodegenerative diseases;Neurodegenerative diseases;Endocrine and metabolic diseases;Neurodegenerative diseases;Energy metabolism;Nervous system	ko01100//Metabolic pathways;ko04714//Thermogenesis;ko05016//Huntington disease;ko05010//Alzheimer disease;ko04932//Non-alcoholic fatty liver disease (NAFLD);ko05012//Parkinson disease;ko00190//Oxidative phosphorylation;ko04723//Retrograde endocannabinoid signaling	K03940;K03940;K03940;K03940;K03940;K03940;K03940;K03940	-	GO:0003824//catalytic activity;GO:0043169//cation binding;GO:0048037//cofactor binding;GO:0051536//iron-sulfur cluster binding	GO:0044710//single-organism metabolic process
0	ncbi_113806187	PFDN5	2.978019	1.97036587	0.595889415	0	0	PFDN5	PREDICTED: prefoldin subunit 5-like [Hyalella azteca]	-	-	-	-	-	-	-
0	ncbi_113829387	ATP5F1B	13.88441124	9.225291724	0.589799564	0	0	ATP5F1B	F1-ATP synthase beta subunit [Litopenaeus vannamei]	Metabolism;Organismal Systems;Human Diseases;Human Diseases;Human Diseases;Metabolism	Global and overview maps;Environmental adaptation;Neurodegenerative diseases;Neurodegenerative diseases;Neurodegenerative diseases;Energy metabolism	ko01100//Metabolic pathways;ko04714//Thermogenesis;ko05016//Huntington disease;ko05010//Alzheimer disease;ko05012//Parkinson disease;ko00190//Oxidative phosphorylation	K02133;K02133;K02133;K02133;K02133;K02133	GO:0033178//proton-transporting two-sector ATPase complex, catalytic domain	GO:0019829//cation-transporting ATPase activity;GO:0032550//purine ribonucleoside binding	GO:0006754//ATP biosynthetic process;GO:0015988//energy coupled proton transmembrane transport, against electrochemical gradient
0	ncbi_113808977	RpL37	30.82142861	20.54188702	0.585365017	0	0	RpL37	PREDICTED: 60S ribosomal protein L37 [Cimex lectularius]	Genetic Information Processing	Translation	ko03010//Ribosome	K02922	GO:0030529//intracellular ribonucleoprotein complex	GO:0003723//RNA binding;GO:0005198//structural molecule activity;GO:0043169//cation binding	GO:0010467//gene expression
0	ncbi_113827071	PFDN6	3.681477941	2.455317794	0.584375292	0	0	PFDN6	PREDICTED: prefoldin subunit 6-like [Hyalella azteca]	-	-	-	-	-	-	-
0	ncbi_113828882	Psmb7	7.733463699	5.167707664	0.58159026	0	0	Psmb7	PREDICTED: proteasome subunit beta type-7-like [Hyalella azteca]	Genetic Information Processing	Folding, sorting and degradation	ko03050//Proteasome	K02739	GO:0043231//intracellular membrane-bounded organelle;GO:0043234//protein complex	GO:0004175//endopeptidase activity	GO:0006508//proteolysis
0	ncbi_113827788	TUBA1A	27.87575916	18.66563376	0.578626601	0	0	TUBA1A	alpha-III tubulin [Homarus americanus]	Cellular Processes;Cellular Processes;Cellular Processes;Human Diseases;Cellular Processes	Transport and catabolism;Cellular community - eukaryotes;Cell growth and death;Infectious diseases;Cellular community - eukaryotes	ko04145//Phagosome;ko04530//Tight junction;ko04210//Apoptosis;ko05130//Pathogenic Escherichia coli infection;ko04540//Gap junction	K07374;K07374;K07374;K07374;K07374	-	-	-
0	ncbi_113819857	eIF-5A	40.57996639	27.17853272	0.578300099	0	0	eIF-5A	eukaryotic translation initiation factor 5A [Litopenaeus vannamei]	-	-	-	-	-	GO:0008135//translation factor activity, RNA binding;GO:0043021//ribonucleoprotein complex binding	GO:0006448//regulation of translational elongation;GO:0006449//regulation of translational termination
0	ncbi_113829363	Ef1gamma	23.11487968	15.48319736	0.578118426	0	0	Ef1gamma	tail muscle elongation factor 1 gamma [Procambarus clarkii]	Human Diseases	Infectious diseases	ko05134//Legionellosis	K03233	-	GO:0008135//translation factor activity, RNA binding	GO:0010467//gene expression
0	ncbi_113818074	ATPsynCf6	12.03600741	8.097587017	0.571792928	0	0	ATPsynCf6	PREDICTED: ATP synthase-coupling factor 6, mitochondrial-like [Hyalella azteca]	Metabolism;Organismal Systems;Human Diseases;Human Diseases;Human Diseases;Metabolism	Global and overview maps;Environmental adaptation;Neurodegenerative diseases;Neurodegenerative diseases;Neurodegenerative diseases;Energy metabolism	ko01100//Metabolic pathways;ko04714//Thermogenesis;ko05016//Huntington disease;ko05010//Alzheimer disease;ko05012//Parkinson disease;ko00190//Oxidative phosphorylation	K02131;K02131;K02131;K02131;K02131;K02131	GO:0016020//membrane;GO:0043231//intracellular membrane-bounded organelle	-	GO:0006818//hydrogen transport
0	ncbi_113828617	ncbi_113828617	6.960079766	4.692362466	0.56878938	0	0	--	CG30415, partial [Drosophila busckii]	-	-	-	-	-	-	-
0	ncbi_113819864	eef1b	30.32463284	20.47733153	0.566462453	0	0	eef1b	elongation factor 1-beta' [Papilio xuthus]	-	-	-	-	-	-	-
0	ncbi_113828963	RpL3	28.67983422	19.36872905	0.566307395	0	0	RpL3	ribosomal protein L3 [Penaeus monodon]	Genetic Information Processing	Translation	ko03010//Ribosome	K02925	GO:0030529//intracellular ribonucleoprotein complex	-	GO:0010467//gene expression
0	ncbi_113803755	RPL15	58.39224017	39.44732955	0.565849022	0	0	RPL15	60S Ribosomal Protein L15 [Pantala flavescens]	Genetic Information Processing	Translation	ko03010//Ribosome	K02877	-	-	-
0	ncbi_113829641	Rpl12	16.36641137	11.06308558	0.564984199	0	0	Rpl12	PREDICTED: 60S ribosomal protein L12-like [Hyalella azteca]	Genetic Information Processing	Translation	ko03010//Ribosome	K02870	GO:0030529//intracellular ribonucleoprotein complex;GO:0043231//intracellular membrane-bounded organelle	GO:0004518//nuclease activity	GO:0006259//DNA metabolic process;GO:0010467//gene expression
0	ncbi_113818569	ncbi_113818569	17.56923745	11.89770945	0.562367725	0	0	--	-	-	-	-	-	-	-	-
0	ncbi_113810058	psma2	9.07007321	6.143484016	0.562057145	0	0	psma2	PREDICTED: proteasome subunit alpha type-2 [Dendroctonus ponderosae]	Genetic Information Processing	Folding, sorting and degradation	ko03050//Proteasome	K02726	GO:0043231//intracellular membrane-bounded organelle;GO:0043234//protein complex	GO:0004175//endopeptidase activity	GO:0019941//modification-dependent protein catabolic process
0	ncbi_113829340	COX6A1	8.205467272	5.56863978	0.559260521	0	0	COX6A1	mitochondrial cytochrome c oxidase subunit VIa precursor [Litopenaeus vannamei]	Metabolism;Organismal Systems;Human Diseases;Human Diseases;Human Diseases;Human Diseases;Metabolism;Organismal Systems	Global and overview maps;Environmental adaptation;Neurodegenerative diseases;Neurodegenerative diseases;Endocrine and metabolic diseases;Neurodegenerative diseases;Energy metabolism;Circulatory system	ko01100//Metabolic pathways;ko04714//Thermogenesis;ko05016//Huntington disease;ko05010//Alzheimer disease;ko04932//Non-alcoholic fatty liver disease (NAFLD);ko05012//Parkinson disease;ko00190//Oxidative phosphorylation;ko04260//Cardiac muscle contraction	K02266;K02266;K02266;K02266;K02266;K02266;K02266;K02266	-	-	-
0	ncbi_113820409	PSMA4	3.52515001	2.394319328	0.558069076	0	0	PSMA4	PREDICTED: proteasome subunit alpha type-4 [Diachasma alloeum]	Genetic Information Processing	Folding, sorting and degradation	ko03050//Proteasome	K02728	GO:0043231//intracellular membrane-bounded organelle;GO:0043234//protein complex	GO:0004175//endopeptidase activity	GO:0019941//modification-dependent protein catabolic process
0	ncbi_113817566	CPIJ010525	5.193598839	3.527832246	0.557952622	0	0	CPIJ010525	PREDICTED: eukaryotic translation initiation factor 3 subunit M [Agrilus planipennis]	-	-	-	-	GO:0070993//translation preinitiation complex	-	GO:0006412//translation
0	ncbi_113809108	ATP5L	22.81492799	15.49855349	0.557844528	0	0	ATP5L	ATP synthase subunit g [Palaemon varians]	Metabolism;Organismal Systems;Metabolism	Global and overview maps;Environmental adaptation;Energy metabolism	ko01100//Metabolic pathways;ko04714//Thermogenesis;ko00190//Oxidative phosphorylation	K02140;K02140;K02140	-	GO:0015077//monovalent inorganic cation transmembrane transporter activity	GO:0006754//ATP biosynthetic process
0	ncbi_113811228	ncbi_113811228	10.65415436	7.243261467	0.556704729	0	0	--	Similar to CG4692 [Heliconius melpomene]	Metabolism;Organismal Systems;Metabolism	Global and overview maps;Environmental adaptation;Energy metabolism	ko01100//Metabolic pathways;ko04714//Thermogenesis;ko00190//Oxidative phosphorylation	K02130;K02130;K02130	-	-	-
0	ncbi_113806311	ncbi_113806311	150.2794045	102.2702684	0.555260513	0	0	--	Kunitz-type serine protease inhibitor [Fenneropenaeus chinensis]	-	-	-	-	-	GO:0030414//peptidase inhibitor activity	GO:0010466//negative regulation of peptidase activity
0	ncbi_113811256	ncbi_113811256	2.742521027	1.86814258	0.553898113	0	0	--	PREDICTED: protein CDV3 homolog [Orussus abietinus]	-	-	-	-	-	-	-
0	ncbi_113826010	NDUFB9	3.634240392	2.475603259	0.553873726	0	0	NDUFB9	NADH dehydrogenase [ubiquinone] 1 beta subcomplex subunit 9 [Zootermopsis nevadensis]	Metabolism;Organismal Systems;Human Diseases;Human Diseases;Human Diseases;Human Diseases;Metabolism;Organismal Systems	Global and overview maps;Environmental adaptation;Neurodegenerative diseases;Neurodegenerative diseases;Endocrine and metabolic diseases;Neurodegenerative diseases;Energy metabolism;Nervous system	ko01100//Metabolic pathways;ko04714//Thermogenesis;ko05016//Huntington disease;ko05010//Alzheimer disease;ko04932//Non-alcoholic fatty liver disease (NAFLD);ko05012//Parkinson disease;ko00190//Oxidative phosphorylation;ko04723//Retrograde endocannabinoid signaling	K03965;K03965;K03965;K03965;K03965;K03965;K03965;K03965	-	-	-
0	ncbi_113818226	Usp14	3.431365609	2.339669813	0.552477909	0	0	Usp14	PREDICTED: ubiquitin carboxyl-terminal hydrolase 14-like [Hyalella azteca]	-	-	-	-	-	-	-
0	ncbi_113823525	RpL10A	14.17816176	9.681377557	0.550386247	0	0	RpL10A	ribosomal protein L10a [Fenneropenaeus merguiensis]	Genetic Information Processing	Translation	ko03010//Ribosome	K02865	-	-	-
0	ncbi_113830368	rpl5-b	26.20053371	17.89731826	0.54985277	0	0	rpl5-b	PREDICTED: 60S ribosomal protein L5-like [Hyalella azteca]	Genetic Information Processing	Translation	ko03010//Ribosome	K02932	GO:0030529//intracellular ribonucleoprotein complex	GO:0005198//structural molecule activity;GO:0019843//rRNA binding	GO:0010467//gene expression
0	ncbi_113825738	YBX1	17.67845684	12.07720922	0.549705229	0	0	YBX1	cold shock Y-box protein [Cherax quadricarinatus]	-	-	-	-	-	-	-
0	ncbi_113817333	ncbi_113817333	34.67337676	23.6888972	0.549617306	0	0	--	-	-	-	-	-	-	-	-
0	ncbi_113816449	NDUFB7	2.840317113	1.940685767	0.549485474	0	0	NDUFB7	AGAP007574-PA [Anopheles gambiae str. PEST] [Anopheles gambiae]	Metabolism;Organismal Systems;Human Diseases;Human Diseases;Human Diseases;Human Diseases;Metabolism;Organismal Systems	Global and overview maps;Environmental adaptation;Neurodegenerative diseases;Neurodegenerative diseases;Endocrine and metabolic diseases;Neurodegenerative diseases;Energy metabolism;Nervous system	ko01100//Metabolic pathways;ko04714//Thermogenesis;ko05016//Huntington disease;ko05010//Alzheimer disease;ko04932//Non-alcoholic fatty liver disease (NAFLD);ko05012//Parkinson disease;ko00190//Oxidative phosphorylation;ko04723//Retrograde endocannabinoid signaling	K03963;K03963;K03963;K03963;K03963;K03963;K03963;K03963	-	GO:0016491//oxidoreductase activity	-
0	ncbi_113824223	RACK1	28.98032646	19.80767455	0.549014331	0	0	RACK1	receptor for activated protein kinase c1 [Penaeus monodon]	Human Diseases	Infectious diseases	ko05162//Measles	K14753	-	-	-
0	ncbi_113802760	Rsl24d1	3.327565414	2.274997466	0.548602089	0	0	Rsl24d1	PREDICTED: probable ribosome biogenesis protein RLP24 [Bemisia tabaci]	Genetic Information Processing	Translation	ko03010//Ribosome	K02896	-	-	-
0	ncbi_113825930	ncbi_113825930	11.49909166	7.864167077	0.548154026	0	0	--	CLUMA_CG000819, isoform A [Clunio marinus]	Organismal Systems;Human Diseases;Human Diseases;Human Diseases;Human Diseases;Metabolism;Organismal Systems	Environmental adaptation;Neurodegenerative diseases;Neurodegenerative diseases;Endocrine and metabolic diseases;Neurodegenerative diseases;Energy metabolism;Circulatory system	ko04714//Thermogenesis;ko05016//Huntington disease;ko05010//Alzheimer disease;ko04932//Non-alcoholic fatty liver disease (NAFLD);ko05012//Parkinson disease;ko00190//Oxidative phosphorylation;ko04260//Cardiac muscle contraction	K02270;K02270;K02270;K02270;K02270;K02270;K02270	-	-	-
0	ncbi_113802126	RPL27	27.0210442	18.48958248	0.547370781	0	0	RPL27	ribosomal protein L27 [Procambarus clarkii]	Genetic Information Processing	Translation	ko03010//Ribosome	K02901	GO:0005840//ribosome;GO:0043227//membrane-bounded organelle	-	-
0	ncbi_113805878	RpL19	45.71247987	31.32827288	0.54512285	0	0	RpL19	60S Ribosomal Protein L19 [Pantala flavescens]	Genetic Information Processing	Translation	ko03010//Ribosome	K02885	GO:0030529//intracellular ribonucleoprotein complex	-	GO:0010467//gene expression
0	ncbi_113826366	RpL32	30.94439116	21.20863149	0.545026405	0	0	RpL32	ribosomal protein L32 [Procambarus clarkii]	Genetic Information Processing	Translation	ko03010//Ribosome	K02912	-	-	-
0	ncbi_113801184	ncbi_113801184	3.45186242	2.36902003	0.543084568	0	0	--	NADH dehydrogenase [ubiquinone] 1 beta subcomplex subunit 4 [Zootermopsis nevadensis]	Metabolism;Organismal Systems;Human Diseases;Human Diseases;Human Diseases;Human Diseases;Metabolism;Organismal Systems	Global and overview maps;Environmental adaptation;Neurodegenerative diseases;Neurodegenerative diseases;Endocrine and metabolic diseases;Neurodegenerative diseases;Energy metabolism;Nervous system	ko01100//Metabolic pathways;ko04714//Thermogenesis;ko05016//Huntington disease;ko05010//Alzheimer disease;ko04932//Non-alcoholic fatty liver disease (NAFLD);ko05012//Parkinson disease;ko00190//Oxidative phosphorylation;ko04723//Retrograde endocannabinoid signaling	K03960;K03960;K03960;K03960;K03960;K03960;K03960;K03960	-	GO:0016491//oxidoreductase activity	-
0	ncbi_113808916	RPL23A	26.23731892	18.02942114	0.541267227	0	0	RPL23A	PREDICTED: 60S ribosomal protein L23a-like [Trichogramma pretiosum]	Genetic Information Processing	Translation	ko03010//Ribosome	K02893	GO:0030529//intracellular ribonucleoprotein complex	GO:0005198//structural molecule activity	GO:0010467//gene expression
0	ncbi_113818553	eEF1delta	6.176574368	4.24458307	0.541184067	0	0	eEF1delta	elongation factor 1-delta protein [Eriocheir sinensis]	Human Diseases	Infectious diseases	ko05168//Herpes simplex infection	K15410	GO:0044424//intracellular part	-	GO:0009987//cellular process
0	ncbi_113805103	RPS12	37.2457501	25.60100597	0.540875316	0	0	RPS12	40S ribosomal protein [Perinereis aibuhitensis]	Genetic Information Processing	Translation	ko03010//Ribosome	K02951	GO:0030529//intracellular ribonucleoprotein complex	-	GO:0010467//gene expression
0	ncbi_113826801	RpS15Aa	50.15040307	34.48689288	0.540213142	0	0	RpS15Aa	ribosomal protein S24 [Marsupenaeus japonicus]	Genetic Information Processing	Translation	ko03010//Ribosome	K02957	GO:0015935//small ribosomal subunit	GO:0005198//structural molecule activity	GO:0010467//gene expression;GO:0051231//spindle elongation
0	ncbi_113821241	ncbi_113821241	8.191690303	5.637092558	0.539209917	0	0	--	-	-	-	-	-	-	-	-
0	ncbi_113806437	RPS27	37.15400133	25.61341928	0.536617732	0	0	RPS27	40S ribosomal protein S27E [Homarus americanus]	Genetic Information Processing	Translation	ko03010//Ribosome	K02978	-	-	-
0	ncbi_113817911	RPL7A	22.03264873	15.20625263	0.534978279	0	0	RPL7A	PREDICTED: 60S ribosomal protein L7a-like [Limulus polyphemus]	Genetic Information Processing	Translation	ko03010//Ribosome	K02936	-	-	-
0	ncbi_113826407	ncbi_113826407	15.05316068	10.39581247	0.534063924	0	0	--	proteasome maturation protein [Culex quinquefasciatus]	-	-	-	-	-	-	-
0	ncbi_113809517	RpS4	70.25170884	48.54536468	0.533199771	0	0	RpS4	PREDICTED: 40S ribosomal protein S4 [Microplitis demolitor]	Genetic Information Processing	Translation	ko03010//Ribosome	K02987	GO:0030529//intracellular ribonucleoprotein complex	GO:0003723//RNA binding;GO:0005198//structural molecule activity	GO:0010467//gene expression
0	ncbi_113823895	ATPsynD	11.61195669	8.025695643	0.532912745	0	0	ATPsynD	PREDICTED: ATP synthase subunit d, mitochondrial [Drosophila ficusphila]	Metabolism;Organismal Systems;Human Diseases;Human Diseases;Human Diseases;Metabolism	Global and overview maps;Environmental adaptation;Neurodegenerative diseases;Neurodegenerative diseases;Neurodegenerative diseases;Energy metabolism	ko01100//Metabolic pathways;ko04714//Thermogenesis;ko05016//Huntington disease;ko05010//Alzheimer disease;ko05012//Parkinson disease;ko00190//Oxidative phosphorylation	K02138;K02138;K02138;K02138;K02138;K02138	-	-	-
0	ncbi_113820238	RpL18	87.7583212	60.67430814	0.532450175	0	0	RpL18	ribosomal protein L18 [Litopenaeus vannamei]	Genetic Information Processing	Translation	ko03010//Ribosome	K02883	GO:0030529//intracellular ribonucleoprotein complex	-	GO:0010467//gene expression
0	ncbi_113815231	RpS25	62.13035158	42.98325131	0.531523604	0	0	RpS25	S25e ribosomal protein [Platystomos albinus]	Genetic Information Processing	Translation	ko03010//Ribosome	K02975	-	-	-
0	ncbi_113828950	eif3g	6.251691412	4.330753406	0.52962854	0	0	eif3g	eukaryotic translation initiation factor 3 subunit G [Penaeus monodon]	Genetic Information Processing	Translation	ko03013//RNA transport	K03248	-	-	-
0	ncbi_113805279	rpl-7	65.62832371	45.5349879	0.527343083	0	0	rpl-7	ribosomal protein L7 [Litopenaeus vannamei]	Genetic Information Processing	Translation	ko03010//Ribosome	K02937	-	-	-
0	ncbi_113815515	rps7	48.82717968	33.89670998	0.526539196	0	0	rps7	ribosomal protein S7 [Procambarus clarkii]	Genetic Information Processing	Translation	ko03010//Ribosome	K02993	GO:0005924//cell-substrate adherens junction;GO:0015935//small ribosomal subunit;GO:0031988//membrane-bounded vesicle;GO:0043231//intracellular membrane-bounded organelle;GO:0044430//cytoskeletal part	GO:0003723//RNA binding	GO:0000956//nuclear-transcribed mRNA catabolic process;GO:0006412//translation;GO:0006613//cotranslational protein targeting to membrane;GO:0007049//cell cycle;GO:0016032//viral process;GO:0016072//rRNA metabolic process;GO:0032774//RNA biosynthetic process;GO:0042254//ribosome biogenesis;GO:0043624//cellular protein complex disassembly;GO:0048534//hematopoietic or lymphoid organ development
0	ncbi_113811251	rps11	26.3100498	18.28953279	0.524595757	0	0	rps11	ribosomal protein S11 [Rimicaris exoculata]	Genetic Information Processing	Translation	ko03010//Ribosome	K02949	GO:0030529//intracellular ribonucleoprotein complex	-	GO:0010467//gene expression
0	ncbi_113808631	rpl-11.2	32.04518676	22.29511503	0.523380035	0	0	rpl-11.2	PREDICTED: 60S ribosomal protein L11-like [Hyalella azteca]	Genetic Information Processing	Translation	ko03010//Ribosome	K02868	GO:0030529//intracellular ribonucleoprotein complex	-	GO:0010467//gene expression
0	ncbi_113808705	RPL13	42.06969109	29.2760419	0.523060709	0	0	RPL13	ribosomal protein L13 [Procambarus clarkii]	Genetic Information Processing	Translation	ko03010//Ribosome	K02873	-	-	-
0	ncbi_113806230	PSMA3	4.245798656	2.954711446	0.523018712	0	0	PSMA3	proteasome alpha 3 [Penaeus monodon]	Genetic Information Processing	Folding, sorting and degradation	ko03050//Proteasome	K02727	GO:0043231//intracellular membrane-bounded organelle;GO:0043234//protein complex	GO:0004175//endopeptidase activity	GO:0019941//modification-dependent protein catabolic process
0	ncbi_113823430	RpL29	32.98697684	22.97558867	0.521794739	0	0	RpL29	60S ribosomal protein L29 [Zootermopsis nevadensis]	Genetic Information Processing	Translation	ko03010//Ribosome	K02905	GO:0005622//intracellular	-	-
0	ncbi_113826962	CCT5	6.352307304	4.426302046	0.521178805	0	0	CCT5	Cct5-prov protein [Daphnia magna]	-	-	-	-	GO:0005815//microtubule organizing center;GO:0031988//membrane-bounded vesicle;GO:0043234//protein complex	GO:0005515//protein binding;GO:0032550//purine ribonucleoside binding	GO:0006810//transport;GO:0035036//sperm-egg recognition;GO:0044267//cellular protein metabolic process;GO:0044707//single-multicellular organism process;GO:0051707//response to other organism
0	ncbi_113810148	RPLP2	8.84264575	6.167369544	0.519822799	0	0	RPLP2	60S acidic ribosomal protein P2-like protein [Scylla paramamosain]	Genetic Information Processing	Translation	ko03010//Ribosome	K02943	GO:0005840//ribosome	-	GO:0010467//gene expression;GO:0034645//cellular macromolecule biosynthetic process
0	ncbi_113802449	RPLP2	22.02271949	15.36376477	0.519460851	0	0	RPLP2	60S acidic ribosomal protein P2 [Scylla paramamosain]	Genetic Information Processing	Translation	ko03010//Ribosome	K02943	GO:0005840//ribosome	-	-
0	ncbi_113812189	psmb3	7.53350148	5.266272483	0.516538398	0	0	psmb3	PREDICTED: proteasome subunit beta type-3-like, partial [Hyalella azteca]	Genetic Information Processing	Folding, sorting and degradation	ko03050//Proteasome	K02735	GO:0043234//protein complex	-	GO:0006508//proteolysis
0	ncbi_113815770	RPS17	14.84022743	10.38484169	0.515033979	0	0	RPS17	PREDICTED: 40S ribosomal protein S17-like [Hyalella azteca]	Genetic Information Processing	Translation	ko03010//Ribosome	K02962	GO:0005924//cell-substrate adherens junction;GO:0015935//small ribosomal subunit;GO:0031988//membrane-bounded vesicle	GO:0003723//RNA binding;GO:0005198//structural molecule activity	GO:0002262//myeloid cell homeostasis;GO:0010467//gene expression;GO:0016072//rRNA metabolic process;GO:0042254//ribosome biogenesis
0	ncbi_113808012	ncbi_113808012	4.022121028	2.816350209	0.514129752	0	0	--	CLUMA_CG003202, isoform A [Clunio marinus]	Metabolism;Organismal Systems;Human Diseases;Human Diseases;Human Diseases;Human Diseases;Metabolism;Organismal Systems	Global and overview maps;Environmental adaptation;Neurodegenerative diseases;Neurodegenerative diseases;Endocrine and metabolic diseases;Neurodegenerative diseases;Energy metabolism;Nervous system	ko01100//Metabolic pathways;ko04714//Thermogenesis;ko05016//Huntington disease;ko05010//Alzheimer disease;ko04932//Non-alcoholic fatty liver disease (NAFLD);ko05012//Parkinson disease;ko00190//Oxidative phosphorylation;ko04723//Retrograde endocannabinoid signaling	K03968;K03968;K03968;K03968;K03968;K03968;K03968;K03968	GO:0016020//membrane	-	-
0	ncbi_113827372	ncbi_113827372	6.004536271	4.209092913	0.512543475	0	0	--	NADH dehydrogenase, partial [Procambarus clarkii]	Metabolism;Organismal Systems;Human Diseases;Human Diseases;Human Diseases;Human Diseases;Metabolism;Organismal Systems	Global and overview maps;Environmental adaptation;Neurodegenerative diseases;Neurodegenerative diseases;Endocrine and metabolic diseases;Neurodegenerative diseases;Energy metabolism;Nervous system	ko01100//Metabolic pathways;ko04714//Thermogenesis;ko05016//Huntington disease;ko05010//Alzheimer disease;ko04932//Non-alcoholic fatty liver disease (NAFLD);ko05012//Parkinson disease;ko00190//Oxidative phosphorylation;ko04723//Retrograde endocannabinoid signaling	K03948;K03948;K03948;K03948;K03948;K03948;K03948;K03948	-	-	-
0	ncbi_113808915	PSMB2	6.579927994	4.615140559	0.511697209	0	0	PSMB2	PREDICTED: proteasome subunit beta type-2-like [Hyalella azteca]	Genetic Information Processing	Folding, sorting and degradation	ko03050//Proteasome	K02734	GO:0044424//intracellular part	GO:0004175//endopeptidase activity	GO:0006508//proteolysis
0	ncbi_113829047	RpL40	79.36809229	55.70785264	0.510678423	0	0	RpL40	ubiquitin/ribosomal L40 fusion protein [Litopenaeus vannamei]	Genetic Information Processing	Translation	ko03010//Ribosome	K02927	GO:0005774//vacuolar membrane;GO:0015934//large ribosomal subunit;GO:0031988//membrane-bounded vesicle	-	GO:0010467//gene expression
0	ncbi_113828339	COX6C	14.28080586	10.0283418	0.509994318	0	0	COX6C	mitochondrial cytochrome c oxidase subunit VIc [Litopenaeus vannamei]	Metabolism;Organismal Systems;Human Diseases;Human Diseases;Human Diseases;Human Diseases;Metabolism;Organismal Systems	Global and overview maps;Environmental adaptation;Neurodegenerative diseases;Neurodegenerative diseases;Endocrine and metabolic diseases;Neurodegenerative diseases;Energy metabolism;Circulatory system	ko01100//Metabolic pathways;ko04714//Thermogenesis;ko05016//Huntington disease;ko05010//Alzheimer disease;ko04932//Non-alcoholic fatty liver disease (NAFLD);ko05012//Parkinson disease;ko00190//Oxidative phosphorylation;ko04260//Cardiac muscle contraction	K02268;K02268;K02268;K02268;K02268;K02268;K02268;K02268	-	-	-
0	ncbi_113808197	RPSA	18.46884581	12.97181317	0.509713559	0	0	RPSA	laminin receptor [Litopenaeus vannamei]	Genetic Information Processing	Translation	ko03010//Ribosome	K02998	-	-	-
0	ncbi_113800445	rpl-37a	50.70278046	35.67898623	0.506990241	0	0	rpl-37a	PREDICTED: 60S ribosomal protein L37a [Pogonomyrmex barbatus]	Genetic Information Processing	Translation	ko03010//Ribosome	K02921	GO:0015934//large ribosomal subunit	GO:0005198//structural molecule activity	GO:0010467//gene expression;GO:0051231//spindle elongation
0	ncbi_113828345	RpS8	48.70677298	34.31041753	0.50547572	0	0	RpS8	ribosomal protein S8 [Manduca sexta]	Genetic Information Processing	Translation	ko03010//Ribosome	K02995	GO:0030529//intracellular ribonucleoprotein complex	-	GO:0010467//gene expression
0	ncbi_113807430	PSMB6	5.858317371	4.132028959	0.503635987	0	0	PSMB6	PREDICTED: proteasome subunit beta type-6-like [Hyalella azteca]	Genetic Information Processing	Folding, sorting and degradation	ko03050//Proteasome	K02738	-	-	-
0	ncbi_113809595	ncbi_113809595	3.904319229	2.755244675	0.502890576	0	0	--	Up-regulated during skeletal muscle growth protein 5 [Zootermopsis nevadensis]	-	-	-	-	-	-	-
0	ncbi_113804715	Rpl35	35.33637173	24.94003814	0.502690243	0	0	Rpl35	ribosomal protein L35 [Procambarus clarkii]	Genetic Information Processing	Translation	ko03010//Ribosome	K02918	-	-	-
0	ncbi_113814890	RpS27A	90.67380796	64.01119467	0.502361639	0	0	RpS27A	ubiquitin [Procambarus clarkii]	Genetic Information Processing	Translation	ko03010//Ribosome	K02977	GO:0015935//small ribosomal subunit;GO:0031981//nuclear lumen;GO:0031988//membrane-bounded vesicle	GO:0003723//RNA binding;GO:0005198//structural molecule activity;GO:0043169//cation binding	GO:0000187//activation of MAPK activity;GO:0002224//toll-like receptor signaling pathway;GO:0006301//postreplication repair;GO:0010467//gene expression
0	ncbi_113810417	ncbi_113810417	4.364665429	3.0846987	0.500741489	0	0	--	-	-	-	-	-	-	-	-
0	ncbi_113826493	RPL6	21.37204763	15.10605379	0.500598309	0	0	RPL6	PREDICTED: 60S ribosomal protein L6-like [Limulus polyphemus]	Genetic Information Processing	Translation	ko03010//Ribosome	K02934	-	-	-
0	ncbi_113817924	CYPA	80.29264376	56.75939402	0.50040863	0	0	CYPA	cyclophilin A [Litopenaeus vannamei]	Human Diseases;Environmental Information Processing;Human Diseases;Environmental Information Processing;Human Diseases	Neurodegenerative diseases;Signal transduction;Neurodegenerative diseases;Signal transduction;Infectious diseases	ko05016//Huntington disease;ko04022//cGMP - PKG signaling pathway;ko05012//Parkinson disease;ko04020//Calcium signaling pathway;ko05145//Toxoplasmosis	K09565;K09565;K09565;K09565;K09565	-	-	-
0	ncbi_113804422	rps6	15.43822083	10.91730787	0.499889357	0	0	rps6	ribosomal protein S6, partial [Macrobrachium olfersii]	Organismal Systems;Human Diseases;Environmental Information Processing;Genetic Information Processing;Environmental Information Processing;Organismal Systems;Environmental Information Processing;Environmental Information Processing;Human Diseases	Environmental adaptation;Cancers;Signal transduction;Translation;Signal transduction;Endocrine system;Signal transduction;Signal transduction;Drug resistance	ko04714//Thermogenesis;ko05205//Proteoglycans in cancer;ko04151//PI3K-Akt signaling pathway;ko03010//Ribosome;ko04150//mTOR signaling pathway;ko04910//Insulin signaling pathway;ko04066//HIF-1 signaling pathway;ko04371//Apelin signaling pathway;ko01521//EGFR tyrosine kinase inhibitor resistance	K02991;K02991;K02991;K02991;K02991;K02991;K02991;K02991;K02991	-	-	-
0	ncbi_113810599	rpl18a	16.91512344	11.96912356	0.498996191	0	0	rpl18a	PREDICTED: 60S ribosomal protein L18a isoform X1 [Protobothrops mucrosquamatus]	Genetic Information Processing	Translation	ko03010//Ribosome	K02882	GO:0015934//large ribosomal subunit	GO:0003723//RNA binding	GO:0010467//gene expression
0	ncbi_113820532	EIF2S3	3.979261142	2.81791763	0.497871139	0	0	EIF2S3	translation initiation factor 2 gamma subunit [Oniscus asellus]	Genetic Information Processing	Translation	ko03013//RNA transport	K03242	-	-	-
0	ncbi_113827843	RPS19	47.86979389	33.90606959	0.497572038	0	0	RPS19	ribosomal protein S19 [Procambarus clarkii]	Genetic Information Processing	Translation	ko03010//Ribosome	K02966	-	-	-
0	ncbi_113821402	RpS9	83.88479174	59.42163036	0.497421085	0	0	RpS9	ribosomal protein S9 [Procambarus clarkii]	Genetic Information Processing	Translation	ko03010//Ribosome	K02997	-	-	-
0	ncbi_113818964	RPL27A	94.21238402	66.75654365	0.497007451	0	0	RPL27A	60s ribosomal protein l27a [Ascaris suum]	Genetic Information Processing	Translation	ko03010//Ribosome	K02900	-	-	-
0	ncbi_113821228	RPS24	33.54180452	23.77341437	0.496611187	0	0	RPS24	PREDICTED: 40S ribosomal protein S24-like [Hyalella azteca]	Genetic Information Processing	Translation	ko03010//Ribosome	K02974	GO:0030529//intracellular ribonucleoprotein complex	GO:0005198//structural molecule activity	GO:0010467//gene expression
0	ncbi_113800567	RPS26	11.90587239	8.44230804	0.49596396	0	0	RPS26	PREDICTED: 40S ribosomal protein S26-like [Hyalella azteca]	Genetic Information Processing	Translation	ko03010//Ribosome	K02976	GO:0030529//intracellular ribonucleoprotein complex	-	GO:0010467//gene expression
0	ncbi_113799988	RPS5	16.54762845	11.73565312	0.495726336	0	0	RPS5	PREDICTED: 40S ribosomal protein S5 [Hyalella azteca]	Genetic Information Processing	Translation	ko03010//Ribosome	K02989	GO:0005924//cell-substrate adherens junction;GO:0015935//small ribosomal subunit;GO:0031988//membrane-bounded vesicle	GO:0005198//structural molecule activity;GO:0044822//poly(A) RNA binding	GO:0006448//regulation of translational elongation
0	ncbi_113813311	vha-10	8.081802419	5.735315413	0.494804252	0	0	vha-10	PREDICTED: V-type proton ATPase subunit G-like [Limulus polyphemus]	Metabolism;Human Diseases;Cellular Processes;Environmental Information Processing;Human Diseases;Metabolism;Human Diseases;Organismal Systems;Human Diseases;Organismal Systems	Global and overview maps;Infectious diseases;Transport and catabolism;Signal transduction;Infectious diseases;Energy metabolism;Infectious diseases;Nervous system;Immune diseases;Excretory system	ko01100//Metabolic pathways;ko05165//Human papillomavirus infection;ko04145//Phagosome;ko04150//mTOR signaling pathway;ko05110//Vibrio cholerae infection;ko00190//Oxidative phosphorylation;ko05120//Epithelial cell signaling in Helicobacter pylori infection;ko04721//Synaptic vesicle cycle;ko05323//Rheumatoid arthritis;ko04966//Collecting duct acid secretion	K02152;K02152;K02152;K02152;K02152;K02152;K02152;K02152;K02152;K02152	GO:0033176//proton-transporting V-type ATPase complex	GO:0022857//transmembrane transporter activity	GO:0044763//single-organism cellular process
0	ncbi_113807280	ncbi_113807280	14.71508043	10.44675263	0.494240877	0	0	--	PREDICTED: apoptosis-inducing factor 1, mitochondrial-like [Hyalella azteca]	-	-	-	-	-	-	-
0	ncbi_113806529	RpL24	17.94150961	12.74250203	0.493652702	0	0	RpL24	ribosomal protein L24 [Marsupenaeus japonicus]	Genetic Information Processing	Translation	ko03010//Ribosome	K02896	-	-	-
0	ncbi_113804344	RPL23	81.28149918	57.78217562	0.492302486	0	0	RPL23	PREDICTED: 60S ribosomal protein L23 [Scleropages formosus]	Genetic Information Processing	Translation	ko03010//Ribosome	K02894	GO:0005924//cell-substrate adherens junction;GO:0015934//large ribosomal subunit;GO:0031988//membrane-bounded vesicle	GO:0003723//RNA binding;GO:0005198//structural molecule activity;GO:0008092//cytoskeletal protein binding	GO:0000956//nuclear-transcribed mRNA catabolic process;GO:0006412//translation;GO:0006606//protein import into nucleus;GO:0006613//cotranslational protein targeting to membrane;GO:0016032//viral process;GO:0030154//cell differentiation;GO:0032774//RNA biosynthetic process;GO:0043624//cellular protein complex disassembly;GO:0051231//spindle elongation
0	ncbi_113829329	RpS23	45.10100948	32.06233885	0.492280055	0	0	RpS23	PREDICTED: 40S ribosomal protein S23 [Halyomorpha halys]	Genetic Information Processing	Translation	ko03010//Ribosome	K02973	GO:0044391//ribosomal subunit	-	GO:0010467//gene expression
0	ncbi_113805829	RpS26	10.85777269	7.728644073	0.490440954	0	0	RpS26	PREDICTED: 40S ribosomal protein S26-like [Hyalella azteca]	Genetic Information Processing	Translation	ko03010//Ribosome	K02976	-	-	-
0	ncbi_113801255	Psmd8	4.303855897	3.064098237	0.490167222	0	0	Psmd8	PREDICTED: 26S proteasome non-ATPase regulatory subunit 8-like [Hyalella azteca]	Human Diseases;Genetic Information Processing	Infectious diseases;Folding, sorting and degradation	ko05169//Epstein-Barr virus infection;ko03050//Proteasome	K03031;K03031	-	-	-
0	ncbi_113804304	RpL8	50.35428633	35.85853702	0.489797961	0	0	RpL8	ribosomal protein L8 [Litopenaeus vannamei]	Genetic Information Processing	Translation	ko03010//Ribosome	K02938	GO:0030529//intracellular ribonucleoprotein complex	-	GO:0010467//gene expression
0	ncbi_113803354	Cd63	3.916467982	2.789856405	0.489362296	0	0	Cd63	tetraspanins-like protein CD63 [Litopenaeus vannamei]	Human Diseases;Cellular Processes	Cancers;Transport and catabolism	ko05205//Proteoglycans in cancer;ko04142//Lysosome	K06497;K06497	-	-	-
0	ncbi_113821217	Prosbeta6	8.981012472	6.401869552	0.488384816	0	0	Prosbeta6	PREDICTED: proteasome subunit beta type-1-like [Hyalella azteca]	Genetic Information Processing	Folding, sorting and degradation	ko03050//Proteasome	K02732	-	-	-
0	ncbi_113826408	RpS18	51.94996427	37.04821089	0.487718883	0	0	RpS18	ribosomal protein S18 [Procambarus clarkii]	Genetic Information Processing	Translation	ko03010//Ribosome	K02964	GO:0030529//intracellular ribonucleoprotein complex	GO:0003676//nucleic acid binding;GO:0005198//structural molecule activity	GO:0010467//gene expression
0	ncbi_113821405	RPL26	3.892419551	2.775904432	0.487709322	0	0	RPL26	ribosomal protein L26 [Penaeus monodon]	Genetic Information Processing	Translation	ko03010//Ribosome	K02898	GO:0044391//ribosomal subunit	-	GO:0010467//gene expression
0	ncbi_113801173	RpL28	64.99214135	46.39945454	0.486157437	0	0	RpL28	60S Ribosomal Protein L28 [Pantala flavescens]	Genetic Information Processing	Translation	ko03010//Ribosome	K02903	-	-	-
0	ncbi_113808364	RpL10	62.27434247	44.46363551	0.486011971	0	0	RpL10	QM protein [Penaeus monodon]	Genetic Information Processing	Translation	ko03010//Ribosome	K02866	GO:0030529//intracellular ribonucleoprotein complex	-	GO:0010467//gene expression
0	ncbi_113822937	UQCRB	4.974364707	3.561175231	0.482158859	0	0	UQCRB	ubiquinol-cytochrome c reductase binding protein [Paracalanus parvus]	Metabolism;Organismal Systems;Human Diseases;Human Diseases;Human Diseases;Human Diseases;Metabolism;Organismal Systems	Global and overview maps;Environmental adaptation;Neurodegenerative diseases;Neurodegenerative diseases;Endocrine and metabolic diseases;Neurodegenerative diseases;Energy metabolism;Circulatory system	ko01100//Metabolic pathways;ko04714//Thermogenesis;ko05016//Huntington disease;ko05010//Alzheimer disease;ko04932//Non-alcoholic fatty liver disease (NAFLD);ko05012//Parkinson disease;ko00190//Oxidative phosphorylation;ko04260//Cardiac muscle contraction	K00417;K00417;K00417;K00417;K00417;K00417;K00417;K00417	GO:0019866//organelle inner membrane;GO:0044455//mitochondrial membrane part	-	GO:0022904//respiratory electron transport chain
0	ncbi_113811304	PSMA5	4.992880212	3.575030716	0.481916657	0	0	PSMA5	PREDICTED: proteasome subunit alpha type-5-like [Hyalella azteca]	Genetic Information Processing	Folding, sorting and degradation	ko03050//Proteasome	K02729	-	-	-
0	ncbi_113810854	Cct8	4.622425507	3.311336388	0.481236493	0	0	Cct8	PREDICTED: T-complex protein 1 subunit theta-like [Hyalella azteca]	-	-	-	-	GO:0044424//intracellular part	GO:0005515//protein binding;GO:0032550//purine ribonucleoside binding	GO:0044267//cellular protein metabolic process
0	ncbi_113821397	Tctp	76.47967761	54.79232118	0.48110272	0	0	Tctp	translationally controlled tumor protein [Litopenaeus vannamei]	-	-	-	-	-	-	-
0	ncbi_113810050	RPS15	59.69187008	42.83776932	0.478651096	0	0	RPS15	PREDICTED: 40S ribosomal protein S15-like [Branchiostoma belcheri]	Genetic Information Processing	Translation	ko03010//Ribosome	K02958	GO:0044391//ribosomal subunit	GO:0005198//structural molecule activity	GO:0010467//gene expression
0	ncbi_113824800	RPL22	21.24266095	15.25620662	0.477568208	0	0	RPL22	lymphoid organ expressed yellow head virus receptor protein, partial [Penaeus monodon]	Genetic Information Processing	Translation	ko03010//Ribosome	K02891	GO:0005622//intracellular	-	GO:0009987//cellular process
0	ncbi_113808507	RPL21	62.50563404	44.8992229	0.47729576	0	0	RPL21	PREDICTED: 60S ribosomal protein L21-like [Hyalella azteca]	Genetic Information Processing	Translation	ko03010//Ribosome	K02889	-	-	-
0	ncbi_113814901	RpL9	25.55337985	18.46525424	0.468700997	0	0	RpL9	ribosomal protein L9 [Procambarus clarkii]	Genetic Information Processing	Translation	ko03010//Ribosome	K02940	GO:0015934//large ribosomal subunit	GO:0003723//RNA binding;GO:0005198//structural molecule activity	GO:0010467//gene expression;GO:0051231//spindle elongation
0	ncbi_113821227	RpL14	101.0165787	73.03047461	0.468021575	0	0	RpL14	PREDICTED: 60S ribosomal protein L14 [Austrofundulus limnaeus]	Genetic Information Processing	Translation	ko03010//Ribosome	K02875	-	-	-
0	ncbi_113803092	CCT6	4.461990756	3.228691916	0.46673774	0	0	CCT6	PREDICTED: T-complex protein 1 subunit zeta-like [Hyalella azteca]	-	-	-	-	GO:0044424//intracellular part	GO:0005515//protein binding;GO:0032550//purine ribonucleoside binding	GO:0044267//cellular protein metabolic process
0	ncbi_113829287	RpLP0	61.92357569	44.82609621	0.466149916	0	0	RpLP0	PREDICTED: 60S acidic ribosomal protein P0 [Agrilus planipennis]	Genetic Information Processing	Translation	ko03010//Ribosome	K02941	GO:0030529//intracellular ribonucleoprotein complex	-	GO:0022613//ribonucleoprotein complex biogenesis;GO:0034645//cellular macromolecule biosynthetic process
0	ncbi_113815887	RpLP1	112.1967747	81.2600513	0.465413023	0	0	RpLP1	ribosomal protein P1 [Palaemon varians]	Genetic Information Processing	Translation	ko03010//Ribosome	K02942	GO:0015934//large ribosomal subunit	GO:0005198//structural molecule activity	GO:0010467//gene expression;GO:0034645//cellular macromolecule biosynthetic process
0	ncbi_113800097	rpl4-a	18.60560065	13.48735906	0.464129082	0	0	rpl4-a	60S ribosomal protein L4 [Orchesella cincta]	Genetic Information Processing	Translation	ko03010//Ribosome	K02930	GO:0030529//intracellular ribonucleoprotein complex	GO:0008092//cytoskeletal protein binding	GO:0010467//gene expression
0	ncbi_113824166	RPS3	25.65673705	18.6005301	0.463993967	0	0	RPS3	PREDICTED: 40S ribosomal protein S3-like [Hyalella azteca]	Genetic Information Processing	Translation	ko03010//Ribosome	K02985	GO:0044391//ribosomal subunit	GO:0003676//nucleic acid binding;GO:0005198//structural molecule activity	GO:0009792//embryo development ending in birth or egg hatching;GO:0010467//gene expression;GO:0030099//myeloid cell differentiation
0	ncbi_113813736	RpL13A	83.24392499	60.4062194	0.462647894	0	0	RpL13A	PREDICTED: 60S ribosomal protein L13a-like [Limulus polyphemus]	Genetic Information Processing	Translation	ko03010//Ribosome	K02872	GO:0005840//ribosome	-	-
0	ncbi_113803635	RpS10	33.33531272	24.19152265	0.462549684	0	0	RpS10	40S ribosomal protein S10 [Pseudodiaptomus poplesia]	Genetic Information Processing	Translation	ko03010//Ribosome	K02947	-	-	-
0	ncbi_113812602	ATPsynO	11.15523621	8.096662884	0.462321748	0	0	ATPsynO	PREDICTED: ATP synthase subunit O, mitochondrial [Amyelois transitella]	Metabolism;Organismal Systems;Human Diseases;Human Diseases;Human Diseases;Metabolism	Global and overview maps;Environmental adaptation;Neurodegenerative diseases;Neurodegenerative diseases;Neurodegenerative diseases;Energy metabolism	ko01100//Metabolic pathways;ko04714//Thermogenesis;ko05016//Huntington disease;ko05010//Alzheimer disease;ko05012//Parkinson disease;ko00190//Oxidative phosphorylation	K02137;K02137;K02137;K02137;K02137;K02137	-	-	-
0	ncbi_113805558	reep6	2.29212371	1.669965552	0.456866568	0	0	reep6	receptor accessory protein 5 [Procambarus clarkii]	-	-	-	-	-	-	-
0	ncbi_113824081	RPL36	19.16902859	13.9741716	0.456014467	0	0	RPL36	ribosomal protein L36 [Procambarus clarkii]	Genetic Information Processing	Translation	ko03010//Ribosome	K02920	GO:0030529//intracellular ribonucleoprotein complex	-	GO:0010467//gene expression
0	ncbi_113808968	ncbi_113808968	4.968445453	3.622892979	0.455652337	0	0	--	-	-	-	-	-	-	-	-
0	ncbi_113827976	COX4I1	8.506134936	6.202794844	0.455585332	0	0	COX4I1	mitochondrial cytochrome c oxidase subunit IV [Litopenaeus vannamei]	Metabolism;Organismal Systems;Human Diseases;Human Diseases;Human Diseases;Human Diseases;Metabolism;Organismal Systems	Global and overview maps;Environmental adaptation;Neurodegenerative diseases;Neurodegenerative diseases;Endocrine and metabolic diseases;Neurodegenerative diseases;Energy metabolism;Circulatory system	ko01100//Metabolic pathways;ko04714//Thermogenesis;ko05016//Huntington disease;ko05010//Alzheimer disease;ko04932//Non-alcoholic fatty liver disease (NAFLD);ko05012//Parkinson disease;ko00190//Oxidative phosphorylation;ko04260//Cardiac muscle contraction	K02263;K02263;K02263;K02263;K02263;K02263;K02263;K02263	-	-	GO:0015992//proton transport
0	ncbi_113806281	RpL17	67.10658781	48.94203221	0.455380395	0	0	RpL17	PREDICTED: 60S ribosomal protein L17 [Halyomorpha halys]	Genetic Information Processing	Translation	ko03010//Ribosome	K02880	GO:0044391//ribosomal subunit	-	GO:0010467//gene expression
0	ncbi_113810981	RpL34	10.42251478	7.608320479	0.454053496	0	0	RpL34	60S ribosomal protein L34 [Daphnia magna]	Genetic Information Processing	Translation	ko03010//Ribosome	K02915	-	-	-
0	ncbi_113800382	EIF3F	6.18635222	4.524123557	0.451450645	0	0	EIF3F	PREDICTED: eukaryotic translation initiation factor 3 subunit F-1-like [Hyalella azteca]	Genetic Information Processing	Translation	ko03013//RNA transport	K03249	GO:0070993//translation preinitiation complex	-	GO:0006412//translation
0	ncbi_113802303	Parcxpwex01	45.63451623	33.4552075	0.447894645	0	0	Parcxpwex01	ribosomal protein S3a [Fenneropenaeus merguiensis]	Genetic Information Processing	Translation	ko03010//Ribosome	K02984	GO:0015935//small ribosomal subunit	-	GO:0010467//gene expression
0	ncbi_113820946	eef1a	77.48472031	56.87745476	0.446054938	0	0	eef1a	elongation factor 1-alpha [Litopenaeus vannamei]	Genetic Information Processing;Human Diseases	Translation;Infectious diseases	ko03013//RNA transport;ko05134//Legionellosis	K03231;K03231	-	-	-
0	ncbi_113810229	rps13	20.0588863	14.76820238	0.441747279	0	0	rps13	ribosomal protein S13, partial [Microcosmus squamiger]	Genetic Information Processing	Translation	ko03010//Ribosome	K02953	GO:0030529//intracellular ribonucleoprotein complex;GO:0043232//intracellular non-membrane-bounded organelle	GO:0005198//structural molecule activity	GO:0010467//gene expression
0	ncbi_113810146	RpL31	8.359914083	6.155063214	0.441714442	0	0	RpL31	60S ribosomal protein L31, partial [Stegodyphus mimosarum]	Genetic Information Processing	Translation	ko03010//Ribosome	K02910	GO:0030529//intracellular ribonucleoprotein complex	-	GO:0010467//gene expression
0	ncbi_113809508	rps20	64.1897927	47.28776208	0.440877035	0	0	rps20	40S ribosomal protein S20 [Procambarus clarkii]	Genetic Information Processing	Translation	ko03010//Ribosome	K02969	GO:0044391//ribosomal subunit	GO:0005198//structural molecule activity	GO:0010467//gene expression
0	ncbi_113813053	Psmc4	5.076547659	3.756450952	0.434477451	0	0	Psmc4	26S protease regulatory subunit 6b [Riptortus pedestris]	Human Diseases;Genetic Information Processing	Infectious diseases;Folding, sorting and degradation	ko05169//Epstein-Barr virus infection;ko03050//Proteasome	K03063;K03063	-	-	-
0	ncbi_113828518	rpl-36.A	32.79651422	24.28075007	0.433729497	0	0	rpl-36.A	ribosomal protein L44 [Procambarus clarkii]	Genetic Information Processing	Translation	ko03010//Ribosome	K02929	GO:0030529//intracellular ribonucleoprotein complex	-	-
0	ncbi_113810598	AAEL002464	6.481229392	4.80307324	0.432309689	0	0	AAEL002464	PREDICTED: V-type proton ATPase subunit F-like [Hyalella azteca]	Metabolism;Human Diseases;Cellular Processes;Environmental Information Processing;Human Diseases;Metabolism;Human Diseases;Organismal Systems;Human Diseases;Organismal Systems	Global and overview maps;Infectious diseases;Transport and catabolism;Signal transduction;Infectious diseases;Energy metabolism;Infectious diseases;Nervous system;Immune diseases;Excretory system	ko01100//Metabolic pathways;ko05165//Human papillomavirus infection;ko04145//Phagosome;ko04150//mTOR signaling pathway;ko05110//Vibrio cholerae infection;ko00190//Oxidative phosphorylation;ko05120//Epithelial cell signaling in Helicobacter pylori infection;ko04721//Synaptic vesicle cycle;ko05323//Rheumatoid arthritis;ko04966//Collecting duct acid secretion	K02151;K02151;K02151;K02151;K02151;K02151;K02151;K02151;K02151;K02151	GO:0033176//proton-transporting V-type ATPase complex	GO:0015078//hydrogen ion transmembrane transporter activity	GO:0015988//energy coupled proton transmembrane transport, against electrochemical gradient
0	ncbi_113828546	RPL35A	29.63262384	21.96047066	0.432277402	0	0	RPL35A	60S ribosomal protein L35a [Centropages dorsispinatus]	Genetic Information Processing	Translation	ko03010//Ribosome	K02917	GO:0030529//intracellular ribonucleoprotein complex	-	GO:0010467//gene expression
0	ncbi_113830059	AGAP009204	6.609075261	4.899875887	0.431703218	0	0	AGAP009204	PREDICTED: eukaryotic translation initiation factor 3 subunit H-like [Hyalella azteca]	Genetic Information Processing;Human Diseases	Translation;Infectious diseases	ko03013//RNA transport;ko05162//Measles	K03247;K03247	-	-	-
0	ncbi_113803529	Rpt6	5.689190147	4.234787765	0.425933632	0	0	Rpt6	PREDICTED: 26S protease regulatory subunit 8 [Hyalella azteca]	Human Diseases;Genetic Information Processing	Infectious diseases;Folding, sorting and degradation	ko05169//Epstein-Barr virus infection;ko03050//Proteasome	K03066;K03066	GO:0044424//intracellular part	GO:0016462//pyrophosphatase activity;GO:0032550//purine ribonucleoside binding	GO:0009057//macromolecule catabolic process
0	ncbi_113829326	RPS16	48.15078215	36.01673429	0.418891858	0	0	RPS16	PREDICTED: 40S ribosomal protein S16 [Lepisosteus oculatus]	Genetic Information Processing	Translation	ko03010//Ribosome	K02960	GO:0005924//cell-substrate adherens junction;GO:0015935//small ribosomal subunit;GO:0031988//membrane-bounded vesicle	GO:0003723//RNA binding;GO:0005198//structural molecule activity	GO:0010467//gene expression;GO:0016072//rRNA metabolic process;GO:0042254//ribosome biogenesis
0	ncbi_113823310	ncbi_113823310	11.03265518	8.34287776	0.403163028	0	0	--	PREDICTED: immediate early response gene 2 protein-like [Halyomorpha halys]	-	-	-	-	-	-	-
0	ncbi_113814902	Vbp1	6.082184496	4.610700505	0.399603623	0	0	Vbp1	PREDICTED: prefoldin subunit 3-like [Hyalella azteca]	-	-	-	-	GO:0043234//protein complex	-	-
0	ncbi_113804555	COX6B2	18.02714206	13.77964564	0.387631908	0	0	COX6B2	mitochondrial cytochrome c oxidase subunit VIb [Litopenaeus vannamei]	Metabolism;Organismal Systems;Human Diseases;Human Diseases;Human Diseases;Human Diseases;Metabolism;Organismal Systems	Global and overview maps;Environmental adaptation;Neurodegenerative diseases;Neurodegenerative diseases;Endocrine and metabolic diseases;Neurodegenerative diseases;Energy metabolism;Circulatory system	ko01100//Metabolic pathways;ko04714//Thermogenesis;ko05016//Huntington disease;ko05010//Alzheimer disease;ko04932//Non-alcoholic fatty liver disease (NAFLD);ko05012//Parkinson disease;ko00190//Oxidative phosphorylation;ko04260//Cardiac muscle contraction	K02267;K02267;K02267;K02267;K02267;K02267;K02267;K02267	-	-	-
0	ncbi_113824162	FAU	38.7608247	29.80827068	0.378886587	0	0	FAU	ubiquitin/ribosomal S30 fusion protein [Penaeus monodon]	Genetic Information Processing	Translation	ko03010//Ribosome	K02983	GO:0005622//intracellular	-	-
0	ncbi_113818471	Adarb1	20.8934062	16.23425402	0.364006617	0	0	Adarb1	PREDICTED: double-stranded RNA-specific editase 1-like [Hyalella azteca]	-	-	-	-	-	-	-
0	ncbi_113800297	Serbp1	1.778659478	1.149443359	0.629854959	1.98E-306	5.31E-302	Serbp1	PREDICTED: plasminogen activator inhibitor 1 RNA-binding protein-like isoform X2 [Orussus abietinus]	-	-	-	-	-	-	-
0	ncbi_113810122	ncbi_113810122	2.040768518	1.334459655	0.61285686	2.57E-306	6.88E-302	--	-	-	-	-	-	-	-	-
0	ncbi_113807830	PMPCB	1.848466952	1.176012555	0.652425788	4.99E-306	1.34E-301	PMPCB	PREDICTED: mitochondrial-processing peptidase subunit beta-like [Limulus polyphemus]	-	-	-	-	-	GO:0004175//endopeptidase activity;GO:0043169//cation binding	GO:0019538//protein metabolic process
0	ncbi_113812478	CCDC58	1.986744116	1.303398527	0.608127803	1.83E-302	4.91E-298	CCDC58	PREDICTED: coiled-coil domain-containing protein 58 [Nasonia vitripennis]	-	-	-	-	-	-	-
0	ncbi_113807229	eIF3-S7	3.645433086	2.699244963	0.433534309	2.75E-299	7.37E-295	eIF3-S7	PREDICTED: eukaryotic translation initiation factor 3 subunit D-like [Hyalella azteca]	Genetic Information Processing	Translation	ko03013//RNA transport	K03251	GO:0043234//protein complex;GO:0070993//translation preinitiation complex	GO:0008135//translation factor activity, RNA binding	GO:0006417//regulation of translation
0	ncbi_113813910	ncbi_113813910	1.887863622	1.242689787	0.603288348	4.23E-299	1.13E-294	--	-	-	-	-	-	-	-	-
0	ncbi_113822949	Ahcy13	1.585889737	0.951966414	0.736309887	6.88E-295	1.84E-290	Ahcy13	PREDICTED: adenosylhomocysteinase-like isoform X1 [Hyalella azteca]	Metabolism;Metabolism	Global and overview maps;Amino acid metabolism	ko01100//Metabolic pathways;ko00270//Cysteine and methionine metabolism	K01251;K01251	-	GO:0003824//catalytic activity	GO:0044237//cellular metabolic process
0	ncbi_113812178	Tim10	1.417808715	0.877208474	0.692671249	4.41E-294	1.18E-289	Tim10	PREDICTED: mitochondrial import inner membrane translocase subunit Tim10-like [Hyalella azteca]	-	-	-	-	-	GO:0043169//cation binding	GO:0006839//mitochondrial transport;GO:0008104//protein localization
0	ncbi_113816434	CMPK	1.194230031	0.613034575	0.962040404	2.50E-289	6.69E-285	CMPK	PREDICTED: UMP-CMP kinase-like [Hyalella azteca]	Metabolism;Metabolism;Metabolism	Global and overview maps;Xenobiotics biodegradation and metabolism;Nucleotide metabolism	ko01100//Metabolic pathways;ko00983//Drug metabolism - other enzymes;ko00240//Pyrimidine metabolism	K13800;K13800;K13800	-	-	-
0	ncbi_113801071	san	1.874067471	1.24931037	0.58504096	6.64E-288	1.78E-283	san	PREDICTED: probable N-acetyltransferase san [Hyalella azteca]	-	-	-	-	-	-	-
0	ncbi_113812758	NHP2	2.024604152	1.357588352	0.576593771	1.37E-287	3.68E-283	NHP2	PREDICTED: H/ACA ribonucleoprotein complex subunit 2-like protein [Limulus polyphemus]	Genetic Information Processing	Translation	ko03008//Ribosome biogenesis in eukaryotes	K11129	-	-	-
0	ncbi_113818191	ncbi_113818191	0.968459308	0.55163543	0.811976311	3.29E-286	8.81E-282	--	-	-	-	-	-	-	-	-
0	ncbi_113814965	EIF2S2	2.490776497	1.658771288	0.58648059	2.27E-285	6.07E-281	EIF2S2	PREDICTED: eukaryotic translation initiation factor 2 subunit 2-like [Hyalella azteca]	Genetic Information Processing	Translation	ko03013//RNA transport	K03238	-	-	-
0	ncbi_113803754	NDUFB11	3.533611895	2.601864608	0.441597703	3.46E-285	9.26E-281	NDUFB11	PREDICTED: NADH dehydrogenase [ubiquinone] 1 beta subcomplex subunit 11, mitochondrial [Ceratosolen solmsi marchali]	Metabolism;Organismal Systems;Human Diseases;Human Diseases;Human Diseases;Human Diseases;Metabolism;Organismal Systems	Global and overview maps;Environmental adaptation;Neurodegenerative diseases;Neurodegenerative diseases;Endocrine and metabolic diseases;Neurodegenerative diseases;Energy metabolism;Nervous system	ko01100//Metabolic pathways;ko04714//Thermogenesis;ko05016//Huntington disease;ko05010//Alzheimer disease;ko04932//Non-alcoholic fatty liver disease (NAFLD);ko05012//Parkinson disease;ko00190//Oxidative phosphorylation;ko04723//Retrograde endocannabinoid signaling	K11351;K11351;K11351;K11351;K11351;K11351;K11351;K11351	-	-	-
0	ncbi_113820643	ncbi_113820643	2.871890487	1.955733457	0.554290975	7.23E-284	1.93E-279	--	-	-	-	-	-	-	-	-
0	ncbi_113799999	ncbi_113799999	1.647303133	0.703677316	1.227120148	2.43E-283	6.52E-279	--	farnesoic acid O-methyltransferase [Nilaparvata lugens]	-	-	-	-	-	-	-
0	ncbi_113825686	ccdc43	3.034022013	2.153043997	0.494853752	1.39E-281	3.72E-277	ccdc43	PREDICTED: coiled-coil domain-containing protein 43-like [Hyalella azteca]	-	-	-	-	-	-	-
0	ncbi_113820949	SRSF2	4.389439491	3.341072358	0.393725499	7.11E-280	1.90E-275	SRSF2	Splicing factor, arginine/serine-rich 2 [Zootermopsis nevadensis]	Genetic Information Processing;Human Diseases	Transcription;Infectious diseases	ko03040//Spliceosome;ko05168//Herpes simplex infection	K12891;K12891	-	GO:0097159//organic cyclic compound binding	-
0	ncbi_113827626	NDUFB8	2.290404806	1.548519433	0.564713114	2.78E-279	7.44E-275	NDUFB8	NADH dehydrogenase [ubiquinone] 1 beta subcomplex subunit 8, mitochondrial [Zootermopsis nevadensis]	Metabolism;Organismal Systems;Human Diseases;Human Diseases;Human Diseases;Human Diseases;Metabolism;Organismal Systems	Global and overview maps;Environmental adaptation;Neurodegenerative diseases;Neurodegenerative diseases;Endocrine and metabolic diseases;Neurodegenerative diseases;Energy metabolism;Nervous system	ko01100//Metabolic pathways;ko04714//Thermogenesis;ko05016//Huntington disease;ko05010//Alzheimer disease;ko04932//Non-alcoholic fatty liver disease (NAFLD);ko05012//Parkinson disease;ko00190//Oxidative phosphorylation;ko04723//Retrograde endocannabinoid signaling	K03964;K03964;K03964;K03964;K03964;K03964;K03964;K03964	-	-	-
0	ncbi_113828659	snu13	1.561630295	0.970224381	0.686662608	5.84E-277	1.56E-272	snu13	PREDICTED: NHP2-like protein 1 [Lingula anatina]	Genetic Information Processing;Genetic Information Processing	Transcription;Translation	ko03040//Spliceosome;ko03008//Ribosome biogenesis in eukaryotes	K12845;K12845	GO:0030529//intracellular ribonucleoprotein complex;GO:0043231//intracellular membrane-bounded organelle;GO:0043232//intracellular non-membrane-bounded organelle	GO:0003676//nucleic acid binding;GO:0046914//transition metal ion binding	GO:0006396//RNA processing;GO:0022613//ribonucleoprotein complex biogenesis
0	ncbi_113805266	CYC1	2.598002374	1.840662945	0.497177279	2.33E-275	6.24E-271	CYC1	Cytochrome c1 [Daphnia magna]	Metabolism;Organismal Systems;Human Diseases;Human Diseases;Human Diseases;Human Diseases;Metabolism;Organismal Systems	Global and overview maps;Environmental adaptation;Neurodegenerative diseases;Neurodegenerative diseases;Endocrine and metabolic diseases;Neurodegenerative diseases;Energy metabolism;Circulatory system	ko01100//Metabolic pathways;ko04714//Thermogenesis;ko05016//Huntington disease;ko05010//Alzheimer disease;ko04932//Non-alcoholic fatty liver disease (NAFLD);ko05012//Parkinson disease;ko00190//Oxidative phosphorylation;ko04260//Cardiac muscle contraction	K00413;K00413;K00413;K00413;K00413;K00413;K00413;K00413	-	GO:0046914//transition metal ion binding	-
0	ncbi_113812049	ncbi_113812049	0.598718374	0.258570702	1.211318728	5.03E-275	1.35E-270	--	PREDICTED: F-box only protein 6-like [Crassostrea gigas]	Genetic Information Processing	Folding, sorting and degradation	ko04141//Protein processing in endoplasmic reticulum	K10100	-	-	-
0	ncbi_113829821	ncbi_113829821	2.959365529	2.15484888	0.457701207	8.75E-275	2.34E-270	--	PREDICTED: mastermind-like protein 2 [Aplysia californica]	-	-	-	-	-	-	-
0	ncbi_113828908	gnpda2	2.589549834	1.664874887	0.637287557	2.12E-272	5.66E-268	gnpda2	PREDICTED: glucosamine-6-phosphate isomerase 2-like isoform X2 [Hyalella azteca]	Metabolism;Metabolism	Global and overview maps;Carbohydrate metabolism	ko01100//Metabolic pathways;ko00520//Amino sugar and nucleotide sugar metabolism	K02564;K02564	GO:0044424//intracellular part	GO:0003824//catalytic activity	GO:0044238//primary metabolic process;GO:1901071//glucosamine-containing compound metabolic process
0	ncbi_113818275	ncbi_113818275	2.886942643	2.086804119	0.468247259	1.17E-271	3.13E-267	--	NDUFA13 [Litopenaeus vannamei]	Metabolism;Organismal Systems;Human Diseases;Human Diseases;Human Diseases;Human Diseases;Metabolism;Organismal Systems	Global and overview maps;Environmental adaptation;Neurodegenerative diseases;Neurodegenerative diseases;Endocrine and metabolic diseases;Neurodegenerative diseases;Energy metabolism;Nervous system	ko01100//Metabolic pathways;ko04714//Thermogenesis;ko05016//Huntington disease;ko05010//Alzheimer disease;ko04932//Non-alcoholic fatty liver disease (NAFLD);ko05012//Parkinson disease;ko00190//Oxidative phosphorylation;ko04723//Retrograde endocannabinoid signaling	K11353;K11353;K11353;K11353;K11353;K11353;K11353;K11353	-	-	-
0	ncbi_113816030	SJCHGC01960	2.455078146	1.707432155	0.523940693	8.29E-270	2.22E-265	SJCHGC01960	heat shock protein 10 [Penaeus monodon]	-	-	-	-	GO:0044424//intracellular part	-	GO:0044267//cellular protein metabolic process
0	ncbi_113806006	Eif1a	3.883004684	2.901323587	0.420462238	1.08E-267	2.88E-263	Eif1a	PREDICTED: eukaryotic translation initiation factor 1A, Y-chromosomal-like [Hyalella azteca]	Genetic Information Processing	Translation	ko03013//RNA transport	K03236	-	-	-
0	ncbi_113809524	Rbm34	1.309962094	0.799223125	0.712854834	8.05E-266	2.16E-261	Rbm34	PREDICTED: RNA-binding protein 34-like isoform X6 [Lingula anatina]	-	-	-	-	-	-	-
0	ncbi_113821987	Csk	1.532606913	1.088133027	0.494132777	1.19E-263	3.18E-259	Csk	Tyrosine-protein kinase CSK, partial [Stegodyphus mimosarum]	Human Diseases	Infectious diseases	ko05120//Epithelial cell signaling in Helicobacter pylori infection	K05728	-	-	-
0	ncbi_113826042	PHB2	2.034391213	1.411231886	0.527642072	6.76E-263	1.81E-258	PHB2	prohibitin 2 [Penaeus monodon]	-	-	-	-	-	-	-
0	ncbi_113830026	PSMB5	1.903887093	1.246557518	0.610998472	1.29E-260	3.45E-256	PSMB5	Proteasome subunit beta type [Daphnia magna]	Genetic Information Processing	Folding, sorting and degradation	ko03050//Proteasome	K02737	GO:0043231//intracellular membrane-bounded organelle;GO:0043234//protein complex	GO:0004175//endopeptidase activity	GO:0006508//proteolysis
0	ncbi_113800161	ncbi_113800161	1.448574663	0.908664559	0.672814332	1.66E-259	4.45E-255	--	PREDICTED: MICOS complex subunit MIC19-like [Hyalella azteca]	-	-	-	-	-	-	-
0	ncbi_113813706	Uqcrfs1	3.323130715	2.413427078	0.461459806	1.89E-257	5.05E-253	Uqcrfs1	Cytochrome b-c1 complex subunit Rieske, mitochondrial [Daphnia magna]	Metabolism;Organismal Systems;Human Diseases;Human Diseases;Human Diseases;Human Diseases;Metabolism;Organismal Systems	Global and overview maps;Environmental adaptation;Neurodegenerative diseases;Neurodegenerative diseases;Endocrine and metabolic diseases;Neurodegenerative diseases;Energy metabolism;Circulatory system	ko01100//Metabolic pathways;ko04714//Thermogenesis;ko05016//Huntington disease;ko05010//Alzheimer disease;ko04932//Non-alcoholic fatty liver disease (NAFLD);ko05012//Parkinson disease;ko00190//Oxidative phosphorylation;ko04260//Cardiac muscle contraction	K00411;K00411;K00411;K00411;K00411;K00411;K00411;K00411	-	-	-
0	ncbi_113805905	Non1	2.105378434	1.511797161	0.47781499	3.78E-256	1.01E-251	Non1	PREDICTED: probable nucleolar GTP-binding protein 1 [Bombus terrestris]	Genetic Information Processing	Translation	ko03008//Ribosome biogenesis in eukaryotes	K06943	GO:0043231//intracellular membrane-bounded organelle	-	-
0	ncbi_113824549	ncbi_113824549	0.713749172	0.328597674	1.1190949	1.07E-255	2.86E-251	--	PREDICTED: interferon alpha-inducible protein 27-like protein 2A isoform X1 [Poecilia mexicana]	-	-	-	-	-	-	-
0	ncbi_113800859	Inx2	4.68291686	2.990017868	0.647253319	2.28E-255	6.10E-251	Inx2	innexin 2 [Penaeus monodon]	-	-	-	-	GO:0005886//plasma membrane;GO:0005911//cell-cell junction;GO:0044425//membrane part	GO:0022829//wide pore channel activity	GO:0002009//morphogenesis of an epithelium;GO:0006810//transport;GO:0007635//chemosensory behavior;GO:0048135//female germ-line cyst formation
0	ncbi_113807541	ncbi_113807541	1.579531019	0.736645025	1.100454784	6.99E-253	1.87E-248	--	hypothetical protein DAPPUDRAFT_213114 [Daphnia pulex]	-	-	-	-	-	-	-
0	ncbi_113813722	CYPA	1.208142742	0.716202105	0.754352254	2.39E-252	6.39E-248	CYPA	PREDICTED: peptidyl-prolyl cis-trans isomerase A2-like isoform X1 [Hyalella azteca]	Human Diseases;Environmental Information Processing;Human Diseases;Environmental Information Processing;Human Diseases	Neurodegenerative diseases;Signal transduction;Neurodegenerative diseases;Signal transduction;Infectious diseases	ko05016//Huntington disease;ko04022//cGMP - PKG signaling pathway;ko05012//Parkinson disease;ko04020//Calcium signaling pathway;ko05145//Toxoplasmosis	K09565;K09565;K09565;K09565;K09565	-	GO:0016859//cis-trans isomerase activity	GO:0044267//cellular protein metabolic process
0	ncbi_113828954	ncbi_113828954	1.984521293	1.323271419	0.584682036	6.86E-251	1.84E-246	--	NADH dehydrogenase [Culex quinquefasciatus]	Metabolism;Organismal Systems;Human Diseases;Human Diseases;Human Diseases;Human Diseases;Metabolism;Organismal Systems	Global and overview maps;Environmental adaptation;Neurodegenerative diseases;Neurodegenerative diseases;Endocrine and metabolic diseases;Neurodegenerative diseases;Energy metabolism;Nervous system	ko01100//Metabolic pathways;ko04714//Thermogenesis;ko05016//Huntington disease;ko05010//Alzheimer disease;ko04932//Non-alcoholic fatty liver disease (NAFLD);ko05012//Parkinson disease;ko00190//Oxidative phosphorylation;ko04723//Retrograde endocannabinoid signaling	K03966;K03966;K03966;K03966;K03966;K03966;K03966;K03966	GO:0043231//intracellular membrane-bounded organelle	GO:0003676//nucleic acid binding;GO:0004003//ATP-dependent DNA helicase activity;GO:0032550//purine ribonucleoside binding	GO:0006259//DNA metabolic process;GO:0007005//mitochondrion organization;GO:0032392//DNA geometric change;GO:0033554//cellular response to stress
0	ncbi_113823550	Sod2	6.295735153	4.881536488	0.367039537	2.23E-250	5.96E-246	Sod2	cytosolic MnSOD [Litopenaeus vannamei]	Human Diseases;Environmental Information Processing;Organismal Systems;Cellular Processes;Environmental Information Processing;Organismal Systems;Organismal Systems	Neurodegenerative diseases;Signal transduction;Aging;Transport and catabolism;Signal transduction;Aging;Aging	ko05016//Huntington disease;ko04013//MAPK signaling pathway - fly;ko04213//Longevity regulating pathway - multiple species;ko04146//Peroxisome;ko04068//FoxO signaling pathway;ko04212//Longevity regulating pathway - worm;ko04211//Longevity regulating pathway - mammal	K04564;K04564;K04564;K04564;K04564;K04564;K04564	-	-	-
0	ncbi_113822103	adrm1b	3.866138071	2.844000542	0.442971421	4.91E-248	1.32E-243	adrm1b	adhesion regulating molecule 1 [Scylla paramamosain]	Human Diseases;Genetic Information Processing	Infectious diseases;Folding, sorting and degradation	ko05169//Epstein-Barr virus infection;ko03050//Proteasome	K06691;K06691	-	-	-
0	ncbi_113828822	PyK	4.227291733	3.06965103	0.461659025	4.93E-248	1.32E-243	PyK	pyruvate kinase 3 [Litopenaeus vannamei]	Metabolism;Human Diseases;Metabolism;Metabolism;Human Diseases;Metabolism;Metabolism;Organismal Systems;Human Diseases;Metabolism;Human Diseases	Global and overview maps;Infectious diseases;Nucleotide metabolism;Global and overview maps;Cancers;Carbohydrate metabolism;Global and overview maps;Endocrine system;Cancers;Carbohydrate metabolism;Endocrine and metabolic diseases	ko01100//Metabolic pathways;ko05165//Human papillomavirus infection;ko00230//Purine metabolism;ko01200//Carbon metabolism;ko05203//Viral carcinogenesis;ko00010//Glycolysis / Gluconeogenesis;ko01230//Biosynthesis of amino acids;ko04922//Glucagon signaling pathway;ko05230//Central carbon metabolism in cancer;ko00620//Pyruvate metabolism;ko04930//Type II diabetes mellitus	K00873;K00873;K00873;K00873;K00873;K00873;K00873;K00873;K00873;K00873;K00873	-	-	-
0	ncbi_113802818	CCT1	2.817805361	2.062805768	0.449963977	9.88E-248	2.65E-243	CCT1	T-complex protein 1 subunit alpha [Scylla paramamosain]	-	-	-	-	GO:0044424//intracellular part	GO:0005515//protein binding;GO:0032550//purine ribonucleoside binding	GO:0044267//cellular protein metabolic process
0	ncbi_113823679	Grpel1	1.345139388	0.839689543	0.679827751	2.46E-245	6.60E-241	Grpel1	PREDICTED: grpE protein homolog, mitochondrial-like [Hyalella azteca]	-	-	-	-	-	GO:0005515//protein binding	-
0	ncbi_113821859	Cacybp	2.449910943	1.789279477	0.45335056	2.32E-244	6.20E-240	Cacybp	PREDICTED: calcyclin-binding protein [Cephus cinctus]	Environmental Information Processing	Signal transduction	ko04310//Wnt signaling pathway	K04507	-	-	-
0	ncbi_113800099	PSMD14	2.805980615	2.009102649	0.481953766	6.00E-244	1.61E-239	PSMD14	PREDICTED: 26S proteasome non-ATPase regulatory subunit 14-like [Hyalella azteca]	Human Diseases;Genetic Information Processing	Infectious diseases;Folding, sorting and degradation	ko05169//Epstein-Barr virus infection;ko03050//Proteasome	K03030;K03030	-	-	-
0	ncbi_113829543	ncbi_113829543	1.842826858	1.270022533	0.537066436	8.88E-244	2.38E-239	--	-	-	-	-	-	-	-	-
0	ncbi_113806207	Psma1	2.442799413	1.745784382	0.484660018	4.89E-241	1.31E-236	Psma1	PREDICTED: proteasome subunit alpha type-1-like [Hyalella azteca]	Genetic Information Processing	Folding, sorting and degradation	ko03050//Proteasome	K02725	-	-	-
0	ncbi_113803266	NOP56	1.069979364	0.654637334	0.708815185	4.19E-240	1.12E-235	NOP56	Nucleolar kke/d repeat protein [Daphnia magna]	Genetic Information Processing	Translation	ko03008//Ribosome biogenesis in eukaryotes	K14564	-	-	-
0	ncbi_113807791	ncbi_113807791	0.67130853	0.361207548	0.894147935	5.91E-238	1.58E-233	--	-	-	-	-	-	-	-	-
0	ncbi_113811357	ovca2	0.86878832	0.419970508	1.048716687	1.07E-234	2.87E-230	ovca2	PREDICTED: ovarian cancer-associated gene 2 protein homolog [Lingula anatina]	-	-	-	-	-	-	-
0	ncbi_113812024	NDUFS6	3.142522443	2.364051167	0.410661787	1.71E-234	4.57E-230	NDUFS6	PREDICTED: NADH dehydrogenase [ubiquinone] iron-sulfur protein 6, mitochondrial [Copidosoma floridanum]	Metabolism;Organismal Systems;Human Diseases;Human Diseases;Human Diseases;Human Diseases;Metabolism;Organismal Systems	Global and overview maps;Environmental adaptation;Neurodegenerative diseases;Neurodegenerative diseases;Endocrine and metabolic diseases;Neurodegenerative diseases;Energy metabolism;Nervous system	ko01100//Metabolic pathways;ko04714//Thermogenesis;ko05016//Huntington disease;ko05010//Alzheimer disease;ko04932//Non-alcoholic fatty liver disease (NAFLD);ko05012//Parkinson disease;ko00190//Oxidative phosphorylation;ko04723//Retrograde endocannabinoid signaling	K03939;K03939;K03939;K03939;K03939;K03939;K03939;K03939	-	-	-
0	ncbi_113814616	ncbi_113814616	2.950443453	2.195260825	0.426539448	1.32E-232	3.55E-228	--	lethal 35Di [Anopheles darlingi]	Metabolism;Organismal Systems;Human Diseases;Human Diseases;Human Diseases;Human Diseases;Metabolism;Organismal Systems	Global and overview maps;Environmental adaptation;Neurodegenerative diseases;Neurodegenerative diseases;Endocrine and metabolic diseases;Neurodegenerative diseases;Energy metabolism;Nervous system	ko01100//Metabolic pathways;ko04714//Thermogenesis;ko05016//Huntington disease;ko05010//Alzheimer disease;ko04932//Non-alcoholic fatty liver disease (NAFLD);ko05012//Parkinson disease;ko00190//Oxidative phosphorylation;ko04723//Retrograde endocannabinoid signaling	K03962;K03962;K03962;K03962;K03962;K03962;K03962;K03962	-	-	-
0	ncbi_113821081	ncbi_113821081	1.526978539	0.978875936	0.641481858	1.95E-232	5.22E-228	--	-	-	-	-	-	-	-	-
0	ncbi_113821849	NDUFB2	1.504943785	0.969499022	0.634398251	2.09E-232	5.60E-228	NDUFB2	PREDICTED: NADH dehydrogenase [ubiquinone] 1 beta subcomplex subunit 2, mitochondrial-like [Athalia rosae]	Metabolism;Organismal Systems;Human Diseases;Human Diseases;Human Diseases;Human Diseases;Metabolism;Organismal Systems	Global and overview maps;Environmental adaptation;Neurodegenerative diseases;Neurodegenerative diseases;Endocrine and metabolic diseases;Neurodegenerative diseases;Energy metabolism;Nervous system	ko01100//Metabolic pathways;ko04714//Thermogenesis;ko05016//Huntington disease;ko05010//Alzheimer disease;ko04932//Non-alcoholic fatty liver disease (NAFLD);ko05012//Parkinson disease;ko00190//Oxidative phosphorylation;ko04723//Retrograde endocannabinoid signaling	K03958;K03958;K03958;K03958;K03958;K03958;K03958;K03958	-	-	-
0	ncbi_113804967	ncbi_113804967	4.369377311	3.140719262	0.476332702	1.47E-231	3.94E-227	--	-	-	-	-	-	-	-	-
0	ncbi_113821644	128up	1.487534956	0.993868014	0.581797392	3.46E-231	9.28E-227	128up	PREDICTED: GTP-binding protein 128up [Copidosoma floridanum]	-	-	-	-	-	GO:0032550//purine ribonucleoside binding	-
0	ncbi_113819922	MRPL12	0.896839608	0.510830003	0.812006732	7.92E-228	2.12E-223	MRPL12	PREDICTED: 39S ribosomal protein L12, mitochondrial-like [Limulus polyphemus]	Genetic Information Processing	Translation	ko03010//Ribosome	K02935	-	-	-
0	ncbi_113829836	Ndufa7	2.210796676	1.565189808	0.498228728	1.62E-227	4.34E-223	Ndufa7	NADH dehydrogenase [ubiquinone] 1 alpha subcomplex subunit 7 [Zootermopsis nevadensis]	Metabolism;Organismal Systems;Human Diseases;Human Diseases;Human Diseases;Human Diseases;Metabolism;Organismal Systems	Global and overview maps;Environmental adaptation;Neurodegenerative diseases;Neurodegenerative diseases;Endocrine and metabolic diseases;Neurodegenerative diseases;Energy metabolism;Nervous system	ko01100//Metabolic pathways;ko04714//Thermogenesis;ko05016//Huntington disease;ko05010//Alzheimer disease;ko04932//Non-alcoholic fatty liver disease (NAFLD);ko05012//Parkinson disease;ko00190//Oxidative phosphorylation;ko04723//Retrograde endocannabinoid signaling	K03951;K03951;K03951;K03951;K03951;K03951;K03951;K03951	-	-	-
0	ncbi_113825351	CG9286	1.731748505	1.162919406	0.574478311	6.39E-223	1.71E-218	CG9286	BRCA2 and CDKN1A interacting protein [Litopenaeus vannamei]	-	-	-	-	-	-	-
0	ncbi_113802117	Nop58	1.212115163	0.781261381	0.63364957	8.04E-222	2.15E-217	Nop58	Nucleolar protein nop5 [Daphnia magna]	Genetic Information Processing	Translation	ko03008//Ribosome biogenesis in eukaryotes	K14565	-	-	-
0	ncbi_113804597	LSM3	1.949692094	1.386092426	0.492222842	5.85E-221	1.57E-216	LSM3	U6 snRNA-associated Sm-like protein LSm3 [Xenopus tropicalis]	Genetic Information Processing;Genetic Information Processing	Transcription;Folding, sorting and degradation	ko03040//Spliceosome;ko03018//RNA degradation	K12622;K12622	GO:0005681//spliceosomal complex	-	-
0	ncbi_113810558	Pdap1	3.186396829	2.373205662	0.425088819	6.36E-219	1.70E-214	Pdap1	PREDICTED: 28 kDa heat- and acid-stable phosphoprotein [Microplitis demolitor]	-	-	-	-	-	-	-
0	ncbi_113821590	KARS	1.162998773	0.737392439	0.657345046	7.11E-218	1.90E-213	KARS	PREDICTED: lysine--tRNA ligase-like isoform X2 [Hyalella azteca]	Genetic Information Processing	Translation	ko00970//Aminoacyl-tRNA biosynthesis	K04567	GO:0043231//intracellular membrane-bounded organelle	GO:0003678//DNA helicase activity	GO:0006281//DNA repair;GO:0032392//DNA geometric change
0	ncbi_113823491	crtK	1.873630716	1.19101928	0.653639865	8.44E-218	2.26E-213	crtK	PREDICTED: translocator protein [Bactrocera oleae]	Environmental Information Processing;Human Diseases;Cellular Processes;Organismal Systems	Signaling molecules and interaction;Infectious diseases;Cell growth and death;Digestive system	ko04080//Neuroactive ligand-receptor interaction;ko05166//HTLV-I infection;ko04214//Apoptosis - fly;ko04979//Cholesterol metabolism	K05770;K05770;K05770;K05770	-	-	-
0	ncbi_113805455	Polr2f	1.922452152	1.406561725	0.450774827	2.54E-217	6.80E-213	Polr2f	PREDICTED: DNA-directed RNA polymerases I, II, and III subunit RPABC2-like [Hyalella azteca]	Metabolism;Human Diseases;Metabolism;Human Diseases;Metabolism;Genetic Information Processing;Organismal Systems	Global and overview maps;Neurodegenerative diseases;Nucleotide metabolism;Infectious diseases;Nucleotide metabolism;Transcription;Immune system	ko01100//Metabolic pathways;ko05016//Huntington disease;ko00230//Purine metabolism;ko05169//Epstein-Barr virus infection;ko00240//Pyrimidine metabolism;ko03020//RNA polymerase;ko04623//Cytosolic DNA-sensing pathway	K03014;K03014;K03014;K03014;K03014;K03014;K03014	GO:0044451//nucleoplasm part	GO:0034062//RNA polymerase activity	GO:0034645//cellular macromolecule biosynthetic process
0	ncbi_113829297	ncbi_113829297	1.318294684	0.86087657	0.61479459	1.71E-216	4.59E-212	--	-	-	-	-	-	-	-	-
0	ncbi_113825119	HYPK	1.393113065	0.904914583	0.622458828	1.85E-215	4.94E-211	HYPK	PREDICTED: huntingtin-interacting protein K-like [Hyalella azteca]	-	-	-	-	GO:0044424//intracellular part	-	-
0	ncbi_113811363	Eif3b	2.143447298	1.534749521	0.481929725	2.08E-214	5.56E-210	Eif3b	PREDICTED: eukaryotic translation initiation factor 3 subunit B-like [Hyalella azteca]	Genetic Information Processing	Translation	ko03013//RNA transport	K03253	-	-	-
0	ncbi_113818336	ABCF2	1.473375132	0.991811589	0.57098681	2.15E-214	5.77E-210	ABCF2	PREDICTED: ATP-binding cassette sub-family F member 2 [Agrilus planipennis]	-	-	-	-	-	GO:0017111//nucleoside-triphosphatase activity;GO:0032550//purine ribonucleoside binding	-
0	ncbi_113808173	CTSB	1.056833081	0.60082267	0.814736377	2.97E-213	7.95E-209	CTSB	cathepsin B [Litopenaeus vannamei]	Cellular Processes;Cellular Processes;Cellular Processes;Organismal Systems;Organismal Systems;Organismal Systems	Transport and catabolism;Cell growth and death;Transport and catabolism;Immune system;Endocrine system;Immune system	ko04142//Lysosome;ko04210//Apoptosis;ko04140//Autophagy - animal;ko04621//NOD-like receptor signaling pathway;ko04924//Renin secretion;ko04612//Antigen processing and presentation	K01363;K01363;K01363;K01363;K01363;K01363	-	GO:0008233//peptidase activity	GO:0008152//metabolic process
0	ncbi_113805414	ncbi_113805414	3.548098703	2.758329224	0.363251482	5.01E-213	1.34E-208	--	-	-	-	-	-	-	-	-
0	ncbi_113812438	Timm17b	1.486310251	0.979793559	0.601185581	1.20E-211	3.21E-207	Timm17b	PREDICTED: mitochondrial import inner membrane translocase subunit Tim17-B-like [Hyalella azteca]	-	-	-	-	GO:0031224//intrinsic component of membrane	-	-
0	ncbi_113813302	Fib	0.891020999	0.549141703	0.698280955	1.83E-210	4.89E-206	Fib	PREDICTED: rRNA 2'-O-methyltransferase fibrillarin [Drosophila eugracilis]	Genetic Information Processing	Translation	ko03008//Ribosome biogenesis in eukaryotes	K14563	GO:0016604//nuclear body;GO:0030529//intracellular ribonucleoprotein complex;GO:0044452//nucleolar part	GO:0003676//nucleic acid binding;GO:0016741//transferase activity, transferring one-carbon groups	GO:0006399//tRNA metabolic process;GO:0010467//gene expression;GO:0016072//rRNA metabolic process;GO:0031023//microtubule organizing center organization;GO:0033554//cellular response to stress
0	ncbi_113826208	PSMA6	1.796806692	1.223059834	0.554940222	1.95E-210	5.21E-206	PSMA6	PREDICTED: proteasome subunit alpha type-6-like [Hyalella azteca]	Genetic Information Processing	Folding, sorting and degradation	ko03050//Proteasome	K02730	-	-	-
0	ncbi_113820812	PFDN2	2.162539265	1.561743324	0.469568965	2.59E-210	6.94E-206	PFDN2	PREDICTED: prefoldin subunit 2-like [Hyalella azteca]	-	-	-	-	GO:0043231//intracellular membrane-bounded organelle	-	-
0	ncbi_113800932	MRPL4	1.173058643	0.770199409	0.606971216	9.29E-210	2.49E-205	MRPL4	39S ribosomal protein L4, mitochondrial [Zootermopsis nevadensis]	Genetic Information Processing	Translation	ko03010//Ribosome	K02926	-	-	-
0	ncbi_113828949	ELOC	1.904945326	1.351609849	0.495070824	1.00E-209	2.68E-205	ELOC	PREDICTED: transcription elongation factor B polypeptide 1 [Crassostrea gigas]	Human Diseases;Genetic Information Processing;Environmental Information Processing;Human Diseases	Cancers;Folding, sorting and degradation;Signal transduction;Cancers	ko05200//Pathways in cancer;ko04120//Ubiquitin mediated proteolysis;ko04066//HIF-1 signaling pathway;ko05211//Renal cell carcinoma	K03872;K03872;K03872;K03872	-	-	-
0	ncbi_113810733	ncbi_113810733	2.398403384	1.448331216	0.727682757	4.75E-209	1.27E-204	--	-	-	-	-	-	-	-	-
0	ncbi_113807539	ubi	2.674481418	1.969548761	0.441394045	2.66E-208	7.12E-204	ubi	PREDICTED: polyubiquitin-B-like [Leptonychotes weddellii]	Organismal Systems	Endocrine system	ko03320//PPAR signaling pathway	K08770	-	-	-
0	ncbi_113817412	ncbi_113817412	2.05647549	1.52128301	0.434885309	4.02E-208	1.08E-203	--	-	-	-	-	-	-	-	-
0	ncbi_113818704	ncbi_113818704	0.757586528	0.373130493	1.02173041	3.75E-207	1.00E-202	--	-	-	-	-	-	-	-	-
0	ncbi_113829113	sars	2.345235645	1.715984356	0.450696489	3.61E-206	9.67E-202	sars	Seryl-tRNA synthetase, cytoplasmic [Zootermopsis nevadensis]	Genetic Information Processing	Translation	ko00970//Aminoacyl-tRNA biosynthesis	K01875	-	-	-
0	ncbi_113822831	ncbi_113822831	3.286969819	2.3782352	0.46686681	8.73E-205	2.34E-200	--	-	-	-	-	-	-	-	-
0	ncbi_113803345	FKBP46	1.063473171	0.66558143	0.676096551	1.73E-204	4.64E-200	FKBP46	FKBP46 [Penaeus monodon]	-	-	-	-	-	GO:0016853//isomerase activity	-
0	ncbi_113810270	CCT7	2.917855113	2.234366752	0.385042236	3.37E-202	9.02E-198	CCT7	chaperonin [Macrobrachium rosenbergii]	-	-	-	-	GO:0015630//microtubule cytoskeleton;GO:0031988//membrane-bounded vesicle;GO:0043231//intracellular membrane-bounded organelle;GO:0043234//protein complex	GO:0005515//protein binding;GO:0032550//purine ribonucleoside binding	GO:0006810//transport;GO:0035036//sperm-egg recognition;GO:0044267//cellular protein metabolic process
0	ncbi_113803927	bcn92	1.400307032	0.920911715	0.604608426	5.86E-202	1.57E-197	bcn92	PREDICTED: LYR motif-containing protein 4-like isoform X2 [Branchiostoma belcheri]	-	-	-	-	-	-	-
0	ncbi_113821722	NAA10	1.821591557	1.302538062	0.483873979	1.58E-199	4.22E-195	NAA10	N-alpha-acetyltransferase [Daphnia magna]	-	-	-	-	-	GO:0016407//acetyltransferase activity	-
0	ncbi_113806303	ncbi_113806303	1.141072362	0.743917825	0.617175112	1.86E-199	4.99E-195	--	PREDICTED: glioma tumor suppressor candidate region gene 2 protein-like isoform X1 [Limulus polyphemus]	Human Diseases	Infectious diseases	ko05168//Herpes simplex infection	K14840	-	-	-
0	ncbi_113805978	nop16	1.395859066	0.950815096	0.553916572	2.94E-198	7.86E-194	nop16	PREDICTED: nucleolar protein 16-like [Lingula anatina]	-	-	-	-	-	-	-
0	ncbi_113828140	Tim8	1.521321182	1.037881693	0.551682765	1.11E-197	2.98E-193	Tim8	PREDICTED: mitochondrial import inner membrane translocase subunit Tim8 [Papilio xuthus]	-	-	-	-	-	GO:0043169//cation binding	GO:0008104//protein localization;GO:0051234//establishment of localization
0	ncbi_113806262	T05H10.6	1.544071302	1.030443459	0.583474029	7.67E-197	2.05E-192	T05H10.6	PREDICTED: LOW QUALITY PROTEIN: probable pyruvate dehydrogenase E1 component subunit alpha, mitochondrial [Hyalella azteca]	Metabolism;Metabolism;Metabolism;Environmental Information Processing;Organismal Systems;Human Diseases;Metabolism;Metabolism	Global and overview maps;Global and overview maps;Carbohydrate metabolism;Signal transduction;Endocrine system;Cancers;Carbohydrate metabolism;Carbohydrate metabolism	ko01100//Metabolic pathways;ko01200//Carbon metabolism;ko00010//Glycolysis / Gluconeogenesis;ko04066//HIF-1 signaling pathway;ko04922//Glucagon signaling pathway;ko05230//Central carbon metabolism in cancer;ko00020//Citrate cycle (TCA cycle);ko00620//Pyruvate metabolism	K00161;K00161;K00161;K00161;K00161;K00161;K00161;K00161	-	-	-
0	ncbi_113809143	ncbi_113809143	1.478918084	1.005695006	0.556349296	2.41E-196	6.46E-192	--	Zn-finger in Ran binding protein and others domain containing protein [Acanthamoeba castellanii str. Neff] [Acanthamoeba castellanii]	-	-	-	-	-	-	-
0	ncbi_113809714	ncbi_113809714	3.07791923	2.272482501	0.437686188	3.71E-196	9.93E-192	--	transcription factor ATF-b [Litopenaeus vannamei]	-	-	-	-	-	-	-
0	ncbi_113818958	PNP	4.069712577	3.058297863	0.412197983	1.07E-194	2.87E-190	PNP	PREDICTED: purine nucleoside phosphorylase-like [Hyalella azteca]	Metabolism;Metabolism;Metabolism;Metabolism	Global and overview maps;Nucleotide metabolism;Nucleotide metabolism;Metabolism of cofactors and vitamins	ko01100//Metabolic pathways;ko00230//Purine metabolism;ko00240//Pyrimidine metabolism;ko00760//Nicotinate and nicotinamide metabolism	K03783;K03783;K03783;K03783	-	-	-
0	ncbi_113822156	NDUFS4	2.277570474	1.688148661	0.432053739	3.40E-193	9.11E-189	NDUFS4	PREDICTED: NADH dehydrogenase [ubiquinone] iron-sulfur protein 4, mitochondrial-like [Hyalella azteca]	Metabolism;Organismal Systems;Human Diseases;Human Diseases;Human Diseases;Human Diseases;Metabolism;Organismal Systems	Global and overview maps;Environmental adaptation;Neurodegenerative diseases;Neurodegenerative diseases;Endocrine and metabolic diseases;Neurodegenerative diseases;Energy metabolism;Nervous system	ko01100//Metabolic pathways;ko04714//Thermogenesis;ko05016//Huntington disease;ko05010//Alzheimer disease;ko04932//Non-alcoholic fatty liver disease (NAFLD);ko05012//Parkinson disease;ko00190//Oxidative phosphorylation;ko04723//Retrograde endocannabinoid signaling	K03937;K03937;K03937;K03937;K03937;K03937;K03937;K03937	-	-	-
0	ncbi_113813107	ncbi_113813107	1.858046876	1.329461104	0.48294533	4.94E-193	1.32E-188	--	-	-	-	-	-	-	-	-
0	ncbi_113816618	Ola1	2.333849138	1.770765206	0.398338375	5.99E-192	1.60E-187	Ola1	PREDICTED: obg-like ATPase 1 isoform X1 [Hyalella azteca]	-	-	-	-	-	GO:0016787//hydrolase activity;GO:0032550//purine ribonucleoside binding;GO:0043021//ribonucleoprotein complex binding	-
0	ncbi_113830033	ncbi_113830033	0.916841214	0.555528724	0.72281039	1.01E-191	2.71E-187	--	-	-	-	-	-	-	-	-
0	ncbi_113806266	SmF	2.886287054	2.194424269	0.395372306	1.16E-191	3.12E-187	SmF	PREDICTED: small nuclear ribonucleoprotein F-like [Hyalella azteca]	Genetic Information Processing	Transcription	ko03040//Spliceosome	K11098	GO:0030529//intracellular ribonucleoprotein complex;GO:0043231//intracellular membrane-bounded organelle;GO:0044423//virion part	-	GO:0006396//RNA processing
0	ncbi_113812238	pfdn1	1.302475158	0.85756633	0.602935688	1.96E-191	5.24E-187	pfdn1	PREDICTED: prefoldin subunit 1-like [Hyalella azteca]	-	-	-	-	-	-	-
0	ncbi_113825776	Pgk	2.568381678	1.890074639	0.442416404	6.31E-191	1.69E-186	Pgk	PREDICTED: phosphoglycerate kinase [Amyelois transitella]	Metabolism;Metabolism;Metabolism;Metabolism;Environmental Information Processing	Global and overview maps;Global and overview maps;Carbohydrate metabolism;Global and overview maps;Signal transduction	ko01100//Metabolic pathways;ko01200//Carbon metabolism;ko00010//Glycolysis / Gluconeogenesis;ko01230//Biosynthesis of amino acids;ko04066//HIF-1 signaling pathway	K00927;K00927;K00927;K00927;K00927	-	GO:0016772//transferase activity, transferring phosphorus-containing groups	GO:0006090//pyruvate metabolic process;GO:0006796//phosphate-containing compound metabolic process
0	ncbi_113803690	pin4	2.557289851	1.979673456	0.36935321	1.99E-190	5.33E-186	pin4	Peptidyl-prolyl cis-trans isomerase NIMA-interacting 4 [Crassostrea gigas]	-	-	-	-	-	-	-
0	ncbi_113819739	CCT4	2.652639094	2.042395041	0.377166462	1.07E-189	2.86E-185	CCT4	PREDICTED: T-complex protein 1 subunit delta-like [Hyalella azteca]	-	-	-	-	-	-	-
0	ncbi_113817645	Rnf7	1.476240481	1.014435992	0.541249918	4.08E-189	1.09E-184	Rnf7	RING finger protein [Eriocheir sinensis]	Genetic Information Processing	Folding, sorting and degradation	ko04120//Ubiquitin mediated proteolysis	K10611	GO:0031461//cullin-RING ubiquitin ligase complex	GO:0019787//ubiquitin-like protein transferase activity;GO:0046914//transition metal ion binding	GO:0032446//protein modification by small protein conjugation
0	ncbi_113829397	ncbi_113829397	1.728716341	1.20006654	0.52658676	7.32E-189	1.96E-184	--	ATP synthase subunit e, mitochondrial [Daphnia magna]	Metabolism;Organismal Systems;Metabolism	Global and overview maps;Environmental adaptation;Energy metabolism	ko01100//Metabolic pathways;ko04714//Thermogenesis;ko00190//Oxidative phosphorylation	K02129;K02129;K02129	-	-	-
0	ncbi_113818693	ACP1	0.71184633	0.399079233	0.834890626	4.05E-188	1.08E-183	ACP1	PREDICTED: low molecular weight phosphotyrosine protein phosphatase-like [Cimex lectularius]	Metabolism;Cellular Processes;Metabolism;Metabolism	Global and overview maps;Cellular community - eukaryotes;Metabolism of cofactors and vitamins;Metabolism of cofactors and vitamins	ko01100//Metabolic pathways;ko04520//Adherens junction;ko00730//Thiamine metabolism;ko00740//Riboflavin metabolism	K14394;K14394;K14394;K14394	-	-	-
0	ncbi_113828091	UCHL3	1.745920206	1.218172847	0.519268773	7.40E-187	1.98E-182	UCHL3	ubiquitin carboxyl-terminal esterase L3 [Penaeus monodon]	-	-	-	-	-	GO:0070011//peptidase activity, acting on L-amino acid peptides	GO:0006508//proteolysis;GO:0009987//cellular process
0	ncbi_113817751	Uchl5	2.328466809	1.752260979	0.410162654	1.89E-186	5.05E-182	Uchl5	ubiquitin carboxyl-terminal hydrolase isozyme L5 [Scylla paramamosain]	-	-	-	-	GO:0044464//cell part	GO:0008238//exopeptidase activity	GO:0019941//modification-dependent protein catabolic process
0	ncbi_113805521	eIF3-S8	1.430457492	0.98381946	0.54001113	3.55E-185	9.52E-181	eIF3-S8	PREDICTED: eukaryotic translation initiation factor 3 subunit C-like [Hyalella azteca]	Genetic Information Processing	Translation	ko03013//RNA transport	K03252	-	-	-
0	ncbi_113815328	Ndufa8	1.607763014	1.120779688	0.520552053	7.13E-185	1.91E-180	Ndufa8	AGAP006918-PA [Anopheles gambiae str. PEST] [Anopheles gambiae]	Metabolism;Organismal Systems;Human Diseases;Human Diseases;Human Diseases;Human Diseases;Metabolism;Organismal Systems	Global and overview maps;Environmental adaptation;Neurodegenerative diseases;Neurodegenerative diseases;Endocrine and metabolic diseases;Neurodegenerative diseases;Energy metabolism;Nervous system	ko01100//Metabolic pathways;ko04714//Thermogenesis;ko05016//Huntington disease;ko05010//Alzheimer disease;ko04932//Non-alcoholic fatty liver disease (NAFLD);ko05012//Parkinson disease;ko00190//Oxidative phosphorylation;ko04723//Retrograde endocannabinoid signaling	K03952;K03952;K03952;K03952;K03952;K03952;K03952;K03952	-	-	-
0	ncbi_113820765	NDUFV1	2.382846382	1.827770087	0.38260134	1.16E-181	3.11E-177	NDUFV1	PREDICTED: NADH dehydrogenase [ubiquinone] flavoprotein 1, mitochondrial-like [Hyalella azteca]	Metabolism;Organismal Systems;Human Diseases;Human Diseases;Human Diseases;Human Diseases;Metabolism;Organismal Systems	Global and overview maps;Environmental adaptation;Neurodegenerative diseases;Neurodegenerative diseases;Endocrine and metabolic diseases;Neurodegenerative diseases;Energy metabolism;Nervous system	ko01100//Metabolic pathways;ko04714//Thermogenesis;ko05016//Huntington disease;ko05010//Alzheimer disease;ko04932//Non-alcoholic fatty liver disease (NAFLD);ko05012//Parkinson disease;ko00190//Oxidative phosphorylation;ko04723//Retrograde endocannabinoid signaling	K03942;K03942;K03942;K03942;K03942;K03942;K03942;K03942	-	GO:0016491//oxidoreductase activity;GO:0032553//ribonucleotide binding;GO:0051536//iron-sulfur cluster binding	GO:0044710//single-organism metabolic process
0	ncbi_113800533	CtBP	1.484619333	1.061421486	0.484095403	1.23E-181	3.30E-177	CtBP	C-terminal-binding protein [Litopenaeus vannamei]	Human Diseases;Environmental Information Processing;Human Diseases;Environmental Information Processing	Cancers;Signal transduction;Cancers;Signal transduction	ko05200//Pathways in cancer;ko04310//Wnt signaling pathway;ko05220//Chronic myeloid leukemia;ko04330//Notch signaling pathway	K04496;K04496;K04496;K04496	-	GO:0000166//nucleotide binding;GO:0016614//oxidoreductase activity, acting on CH-OH group of donors	GO:0044710//single-organism metabolic process
0	ncbi_113820745	NOP2	1.271960785	0.868210628	0.550937204	2.55E-181	6.84E-177	NOP2	PREDICTED: probable 28S rRNA (cytosine-C(5))-methyltransferase [Limulus polyphemus]	-	-	-	-	-	-	-
0	ncbi_113812554	ncbi_113812554	1.222191626	0.772308754	0.662220872	1.37E-177	3.67E-173	--	PREDICTED: synaptotagmin-7-like [Limulus polyphemus]	-	-	-	-	-	-	-
0	ncbi_113829686	ncbi_113829686	1.180249178	0.800753326	0.559661688	1.96E-173	5.26E-169	--	-	-	-	-	-	-	-	-
0	ncbi_113822475	ncbi_113822475	1.131539979	0.781155032	0.534606752	1.74E-170	4.65E-166	--	-	-	-	-	-	-	-	-
0	ncbi_113829108	let-70	1.562517011	1.031087883	0.599704592	5.04E-170	1.35E-165	let-70	Ubiquitin-conjugating enzyme/RWD-like protein [Pseudocohnilembus persalinus]	Genetic Information Processing;Environmental Information Processing;Genetic Information Processing;Human Diseases;Organismal Systems	Folding, sorting and degradation;Signal transduction;Folding, sorting and degradation;Infectious diseases;Immune system	ko04141//Protein processing in endoplasmic reticulum;ko04013//MAPK signaling pathway - fly;ko04120//Ubiquitin mediated proteolysis;ko05131//Shigellosis;ko04624//Toll and Imd signaling pathway	K06689;K06689;K06689;K06689;K06689	GO:0043234//protein complex	GO:0004842//ubiquitin-protein transferase activity;GO:0044389//ubiquitin-like protein ligase binding	GO:0001754//eye photoreceptor cell differentiation;GO:0007126//meiotic nuclear division;GO:0010608//posttranscriptional regulation of gene expression;GO:0016567//protein ubiquitination;GO:0019827//stem cell population maintenance;GO:0042551//neuron maturation;GO:0043161//proteasome-mediated ubiquitin-dependent protein catabolic process;GO:0046532//regulation of photoreceptor cell differentiation;…
0	ncbi_113803641	vps25	1.452577158	1.029443676	0.4967499	1.57E-168	4.20E-164	vps25	PREDICTED: vacuolar protein-sorting-associated protein 25-like [Hyalella azteca]	Cellular Processes	Transport and catabolism	ko04144//Endocytosis	K12189	-	-	-
0	ncbi_113827826	ncbi_113827826	0.729618569	0.418723191	0.801145622	7.29E-168	1.95E-163	--	-	-	-	-	-	-	-	-
0	ncbi_113813082	psmc3-b	2.233741545	1.68787593	0.404253409	7.62E-168	2.04E-163	psmc3-b	PREDICTED: 26S protease regulatory subunit 6A-B [Hyalella azteca]	Human Diseases;Genetic Information Processing	Infectious diseases;Folding, sorting and degradation	ko05169//Epstein-Barr virus infection;ko03050//Proteasome	K03065;K03065	GO:0044424//intracellular part	GO:0003824//catalytic activity;GO:0032550//purine ribonucleoside binding	GO:0009057//macromolecule catabolic process
0	ncbi_113812066	ncbi_113812066	0.739300798	0.461155798	0.680907233	1.14E-167	3.06E-163	--	-	-	-	-	-	-	-	-
0	ncbi_113811194	ncbi_113811194	3.323227932	2.32309598	0.516536486	2.00E-167	5.35E-163	--	-	-	-	-	-	-	-	-
0	ncbi_113823592	PSMD13	1.852627922	1.36090268	0.445009261	3.68E-166	9.85E-162	PSMD13	PREDICTED: 26S proteasome non-ATPase regulatory subunit 13-like [Hyalella azteca]	Human Diseases;Genetic Information Processing	Infectious diseases;Folding, sorting and degradation	ko05169//Epstein-Barr virus infection;ko03050//Proteasome	K03039;K03039	-	-	-
0	ncbi_113823506	SmE	2.04101731	1.523687345	0.42172152	4.42E-166	1.18E-161	SmE	PREDICTED: probable small nuclear ribonucleoprotein E [Hyalella azteca]	Genetic Information Processing	Transcription	ko03040//Spliceosome	K11097	GO:0030529//intracellular ribonucleoprotein complex	-	-
0	ncbi_113800799	ncbi_113800799	1.4087794	0.895515612	0.653655229	2.70E-165	7.23E-161	--	-	-	-	-	-	-	-	-
0	ncbi_113826031	hsdl2	1.444565133	1.012716877	0.512404354	1.25E-164	3.36E-160	hsdl2	PREDICTED: hydroxysteroid dehydrogenase-like protein 2 isoform X1 [Nicrophorus vespilloides]	-	-	-	-	-	-	-
0	ncbi_113822724	Ftsj3	0.926312052	0.604183501	0.616511495	1.76E-164	4.72E-160	Ftsj3	PREDICTED: pre-rRNA processing protein FTSJ3 [Cephus cinctus]	-	-	-	-	-	-	-
0	ncbi_113817394	Rpn7	2.127630935	1.589429113	0.420739244	9.21E-164	2.47E-159	Rpn7	26S proteasome non-ATPase regulatory subunit 6, partial [Stegodyphus mimosarum]	Human Diseases;Genetic Information Processing	Infectious diseases;Folding, sorting and degradation	ko05169//Epstein-Barr virus infection;ko03050//Proteasome	K03037;K03037	-	-	-
0	ncbi_113812232	mak16-b	1.092609447	0.736066927	0.569868946	9.85E-164	2.64E-159	mak16-b	PREDICTED: protein MAK16 homolog [Plutella xylostella]	-	-	-	-	-	-	-
0	ncbi_113815925	Eif4ebp1	0.84191496	0.54532642	0.626554465	4.87E-163	1.30E-158	Eif4ebp1	eukaryotic initiation factor 4E binding protein [Marsupenaeus japonicus]	Genetic Information Processing;Organismal Systems	Translation;Aging	ko03013//RNA transport;ko04213//Longevity regulating pathway - multiple species	K18644;K18644	-	-	-
0	ncbi_113803425	Ndufs2	2.178119872	1.685002346	0.370332754	5.82E-163	1.56E-158	Ndufs2	PREDICTED: NADH-ubiquinone oxidoreductase 49 kDa subunit [Bactrocera dorsalis]	Metabolism;Organismal Systems;Human Diseases;Human Diseases;Human Diseases;Human Diseases;Metabolism;Organismal Systems	Global and overview maps;Environmental adaptation;Neurodegenerative diseases;Neurodegenerative diseases;Endocrine and metabolic diseases;Neurodegenerative diseases;Energy metabolism;Nervous system	ko01100//Metabolic pathways;ko04714//Thermogenesis;ko05016//Huntington disease;ko05010//Alzheimer disease;ko04932//Non-alcoholic fatty liver disease (NAFLD);ko05012//Parkinson disease;ko00190//Oxidative phosphorylation;ko04723//Retrograde endocannabinoid signaling	K03935;K03935;K03935;K03935;K03935;K03935;K03935;K03935	-	GO:0000166//nucleotide binding;GO:0016491//oxidoreductase activity;GO:0048037//cofactor binding	GO:0044710//single-organism metabolic process
0	ncbi_113823271	CCT2	1.165975143	0.784014285	0.572585187	7.29E-163	1.95E-158	CCT2	Tcp-1-beta [Litopenaeus vannamei]	-	-	-	-	-	GO:0005515//protein binding	GO:0044267//cellular protein metabolic process
0	ncbi_113828611	riox1	0.579342703	0.334929295	0.790560438	1.15E-162	3.08E-158	riox1	PREDICTED: bifunctional lysine-specific demethylase and histidyl-hydroxylase NO66 isoform X1 [Crassostrea gigas]	-	-	-	-	-	-	-
0	ncbi_113809111	eIF3i	1.145750552	0.762059986	0.588316511	3.36E-162	8.99E-158	eIF3i	PREDICTED: eukaryotic translation initiation factor 3 subunit I-like [Hyalella azteca]	Genetic Information Processing	Translation	ko03013//RNA transport	K03246	GO:0070993//translation preinitiation complex	-	GO:0006412//translation
0	ncbi_113827213	ncbi_113827213	1.318426927	0.9103739	0.534286511	1.05E-161	2.82E-157	--	PREDICTED: protein QIL1-like isoform X1 [Limulus polyphemus]	-	-	-	-	-	-	-
0	ncbi_113813708	Caf1	0.897182915	0.598466093	0.584132637	3.77E-161	1.01E-156	Caf1	PREDICTED: probable histone-binding protein Caf1 isoform X2 [Trachymyrmex zeteki]	Cellular Processes	Cell growth and death	ko04218//Cellular senescence	K10752	-	-	-
0	ncbi_113805895	ncbi_113805895	0.872565748	0.572487282	0.6080202	2.47E-160	6.61E-156	--	PREDICTED: nucleolar transcription factor 1 [Tribolium castaneum]	-	-	-	-	-	-	-
0	ncbi_113821020	Atp6ap2	2.740155738	2.11861235	0.371138255	2.87E-160	7.70E-156	Atp6ap2	PREDICTED: renin receptor-like [Hyalella azteca]	-	-	-	-	-	-	-
0	ncbi_113811749	ced-10	0.817179024	0.567881191	0.525063044	2.13E-159	5.71E-155	ced-10	PREDICTED: ras-like GTP-binding protein RhoL [Cerapachys biroi]	Human Diseases;Cellular Processes;Human Diseases;Cellular Processes;Environmental Information Processing;Cellular Processes;Cellular Processes;Environmental Information Processing;Human Diseases;Environmental Information Processing;Cellular Processes;Human Diseases;Human Diseases;Human Diseases;Human Diseases;Environmental Information Processing;Organismal Systems;Environmental Information Proces…	Cancers;Cellular community - eukaryotes;Cancers;Transport and catabolism;Signal transduction;Cell motility;Cellular community - eukaryotes;Signal transduction;Cancers;Signal transduction;Cellular community - eukaryotes;Cardiovascular diseases;Infectious diseases;Infectious diseases;Infectious diseases;Signal transduction;Digestive system;Signal transduction;Cancers;Cardiovascular diseases;Signal …	ko05200//Pathways in cancer;ko04510//Focal adhesion;ko05205//Proteoglycans in cancer;ko04145//Phagosome;ko04151//PI3K-Akt signaling pathway;ko04810//Regulation of actin cytoskeleton;ko04530//Tight junction;ko04015//Rap1 signaling pathway;ko05231//Choline metabolism in cancer;ko04013//MAPK signaling pathway - fly;ko04520//Adherens junction;ko05418//Fluid shear stress and atherosclerosis;ko05131//S…	K04392;K04392;K04392;K04392;K04392;K04392;K04392;K04392;K04392;K04392;K04392;K04392;K04392;K04392;K04392;K04392;K04392;K04392;K04392;K04392;K04392;K04392;K04392;K04392;K04392;K04392;K04392;K04392;K04392;K04392;K04392;K04392;K04392;K04392;K04392;K04392;K04392;K04392;K04392;K04392;K04392;K04392;K04392	-	-	-
0	ncbi_113804045	Chchd2	1.794284248	1.318000019	0.445058067	2.22E-159	5.96E-155	Chchd2	coiled-coil-helix-coiled-coil-helix domain-containing protein 2, mitochondrial-like protein [Danaus plexippus]	-	-	-	-	-	-	-
0	ncbi_113828660	Hadhb	2.37008172	1.830476179	0.372717805	6.03E-159	1.62E-154	Hadhb	Trifunctional enzyme subunit beta, mitochondrial [Daphnia magna]	Metabolism;Metabolism;Metabolism;Metabolism;Metabolism	Global and overview maps;Amino acid metabolism;Lipid metabolism;Global and overview maps;Lipid metabolism	ko01100//Metabolic pathways;ko00280//Valine, leucine and isoleucine degradation;ko00071//Fatty acid degradation;ko01212//Fatty acid metabolism;ko00062//Fatty acid elongation	K07509;K07509;K07509;K07509;K07509	-	GO:0016740//transferase activity	-
0	ncbi_113820948	ncbi_113820948	0.969609147	0.65288086	0.570583561	3.17E-157	8.49E-153	--	-	-	-	-	-	-	-	-
0	ncbi_113829366	LSM7	1.722799952	1.300166621	0.406058666	3.85E-157	1.03E-152	LSM7	PREDICTED: U6 snRNA-associated Sm-like protein LSm7 [Hyalella azteca]	Genetic Information Processing;Genetic Information Processing	Transcription;Folding, sorting and degradation	ko03040//Spliceosome;ko03018//RNA degradation	K12626;K12626	-	-	-
0	ncbi_113821421	DLD	1.96035139	1.462631682	0.422545761	1.90E-156	5.09E-152	DLD	PREDICTED: dihydrolipoyl dehydrogenase, mitochondrial-like [Hyalella azteca]	Metabolism;Metabolism;Metabolism;Metabolism;Metabolism;Metabolism;Metabolism;Metabolism;Metabolism	Global and overview maps;Global and overview maps;Carbohydrate metabolism;Amino acid metabolism;Amino acid metabolism;Carbohydrate metabolism;Carbohydrate metabolism;Carbohydrate metabolism;Carbohydrate metabolism	ko01100//Metabolic pathways;ko01200//Carbon metabolism;ko00010//Glycolysis / Gluconeogenesis;ko00280//Valine, leucine and isoleucine degradation;ko00260//Glycine, serine and threonine metabolism;ko00020//Citrate cycle (TCA cycle);ko00620//Pyruvate metabolism;ko00630//Glyoxylate and dicarboxylate metabolism;ko00640//Propanoate metabolism	K00382;K00382;K00382;K00382;K00382;K00382;K00382;K00382;K00382	-	GO:0000166//nucleotide binding;GO:0016651//oxidoreductase activity, acting on NAD(P)H;GO:0016723//oxidoreductase activity, oxidizing metal ions, NAD or NADP as acceptor;GO:0046914//transition metal ion binding	GO:0019725//cellular homeostasis;GO:0044710//single-organism metabolic process;GO:0061687//detoxification of inorganic compound
0	ncbi_113822473	ncbi_113822473	1.110985805	0.774503751	0.520496252	5.24E-156	1.40E-151	--	-	-	-	-	-	-	-	-
0	ncbi_113823237	ncbi_113823237	1.807565768	1.314016995	0.460064205	1.04E-154	2.78E-150	--	PREDICTED: ragulator complex protein LAMTOR5 [Anoplophora glabripennis]	Environmental Information Processing;Human Diseases	Signal transduction;Infectious diseases	ko04150//mTOR signaling pathway;ko05161//Hepatitis B	K16344;K16344	-	-	GO:0009987//cellular process
0	ncbi_113800945	RRS1	1.490080728	1.133910266	0.394084018	1.27E-154	3.41E-150	RRS1	PREDICTED: ribosome biogenesis regulatory protein homolog [Hyalella azteca]	-	-	-	-	GO:0043231//intracellular membrane-bounded organelle;GO:0043232//intracellular non-membrane-bounded organelle	GO:0003723//RNA binding	GO:0000070//mitotic sister chromatid segregation
0	ncbi_113815571	PSME3	0.961900341	0.620701292	0.631988281	1.50E-154	4.01E-150	PSME3	PREDICTED: proteasome activator complex subunit 3-like isoform X2 [Parasteatoda tepidariorum]	Human Diseases;Genetic Information Processing;Organismal Systems	Infectious diseases;Folding, sorting and degradation;Immune system	ko05160//Hepatitis C;ko03050//Proteasome;ko04612//Antigen processing and presentation	K06698;K06698;K06698	-	-	-
0	ncbi_113826960	Psmd3	1.86240307	1.385337666	0.426927676	3.05E-154	8.16E-150	Psmd3	PREDICTED: probable 26S proteasome non-ATPase regulatory subunit 3 [Hyalella azteca]	Human Diseases;Genetic Information Processing	Infectious diseases;Folding, sorting and degradation	ko05169//Epstein-Barr virus infection;ko03050//Proteasome	K03033;K03033	-	-	GO:0009894//regulation of catabolic process
0	ncbi_113822476	ncbi_113822476	0.892653199	0.579389241	0.623566893	5.79E-154	1.55E-149	--	-	-	-	-	-	-	-	-
0	ncbi_113812897	ACAA2	1.407553669	0.996677596	0.497991129	1.13E-153	3.02E-149	ACAA2	PREDICTED: 3-ketoacyl-CoA thiolase, mitochondrial-like [Hyalella azteca]	Metabolism;Metabolism;Metabolism;Metabolism;Metabolism	Global and overview maps;Amino acid metabolism;Lipid metabolism;Global and overview maps;Lipid metabolism	ko01100//Metabolic pathways;ko00280//Valine, leucine and isoleucine degradation;ko00071//Fatty acid degradation;ko01212//Fatty acid metabolism;ko00062//Fatty acid elongation	K07508;K07508;K07508;K07508;K07508	-	GO:0016746//transferase activity, transferring acyl groups	-
0	ncbi_113802334	ncbi_113802334	0.804781073	0.505420925	0.671110981	4.49E-153	1.20E-148	--	-	-	-	-	-	-	-	-
0	ncbi_113824784	ncbi_113824784	0.945464694	0.581710825	0.700721432	1.12E-152	2.99E-148	--	-	-	-	-	-	-	-	-
0	ncbi_113826974	Eif6	0.808645321	0.514409886	0.652588694	2.44E-152	6.54E-148	Eif6	eukaryotic translation initiation factor 6 [Fenneropenaeus chinensis]	Genetic Information Processing	Translation	ko03008//Ribosome biogenesis in eukaryotes	K03264	GO:0005882//intermediate filament;GO:0031988//membrane-bounded vesicle;GO:0043231//intracellular membrane-bounded organelle	GO:0043021//ribonucleoprotein complex binding	GO:0006412//translation;GO:0042255//ribosome assembly
0	ncbi_113800176	PNO1	0.917287272	0.588368695	0.640653134	7.61E-152	2.04E-147	PNO1	RNA-binding protein pno1 [Daphnia magna]	-	-	-	-	GO:0043231//intracellular membrane-bounded organelle;GO:0043232//intracellular non-membrane-bounded organelle	GO:0003676//nucleic acid binding	-
0	ncbi_113817808	POLR2E	1.456133717	1.075158306	0.437593747	3.64E-148	9.74E-144	POLR2E	PREDICTED: DNA-directed RNA polymerases I, II, and III subunit RPABC1-like [Hyalella azteca]	Metabolism;Human Diseases;Metabolism;Human Diseases;Metabolism;Genetic Information Processing;Organismal Systems	Global and overview maps;Neurodegenerative diseases;Nucleotide metabolism;Infectious diseases;Nucleotide metabolism;Transcription;Immune system	ko01100//Metabolic pathways;ko05016//Huntington disease;ko00230//Purine metabolism;ko05169//Epstein-Barr virus infection;ko00240//Pyrimidine metabolism;ko03020//RNA polymerase;ko04623//Cytosolic DNA-sensing pathway	K03013;K03013;K03013;K03013;K03013;K03013;K03013	GO:0043231//intracellular membrane-bounded organelle	GO:0034062//RNA polymerase activity	GO:0034645//cellular macromolecule biosynthetic process
0	ncbi_113821321	PHPT1	2.283096501	1.782832327	0.356820814	1.58E-146	4.24E-142	PHPT1	PREDICTED: 14 kDa phosphohistidine phosphatase-like [Hyalella azteca]	-	-	-	-	-	-	-
0	ncbi_113819791	AK6	1.419483567	1.01469713	0.484316976	1.74E-146	4.67E-142	AK6	adenylate kinase isoenzyme 6 [Callorhinchus milii]	Metabolism;Metabolism;Genetic Information Processing	Global and overview maps;Nucleotide metabolism;Translation	ko01100//Metabolic pathways;ko00230//Purine metabolism;ko03008//Ribosome biogenesis in eukaryotes	K18532;K18532;K18532	GO:0016604//nuclear body	GO:0016776//phosphotransferase activity, phosphate group as acceptor;GO:0017111//nucleoside-triphosphatase activity;GO:0032550//purine ribonucleoside binding	GO:0009117//nucleotide metabolic process
0	ncbi_113808967	NDUFA6	1.914433885	1.451245657	0.399626088	2.98E-146	7.98E-142	NDUFA6	AAEL000138-PA [Aedes aegypti]	Metabolism;Organismal Systems;Human Diseases;Human Diseases;Human Diseases;Human Diseases;Metabolism;Organismal Systems	Global and overview maps;Environmental adaptation;Neurodegenerative diseases;Neurodegenerative diseases;Endocrine and metabolic diseases;Neurodegenerative diseases;Energy metabolism;Nervous system	ko01100//Metabolic pathways;ko04714//Thermogenesis;ko05016//Huntington disease;ko05010//Alzheimer disease;ko04932//Non-alcoholic fatty liver disease (NAFLD);ko05012//Parkinson disease;ko00190//Oxidative phosphorylation;ko04723//Retrograde endocannabinoid signaling	K03950;K03950;K03950;K03950;K03950;K03950;K03950;K03950	-	-	-
0	ncbi_113823162	ncbi_113823162	1.654972064	1.213857008	0.447208381	8.29E-146	2.22E-141	--	AGAP007297-PA-like protein [Anopheles sinensis]	-	-	-	-	-	-	-
0	ncbi_113825517	NDUFS3	1.515864894	1.086094723	0.480991243	2.85E-145	7.64E-141	NDUFS3	PREDICTED: NADH dehydrogenase [ubiquinone] iron-sulfur protein 3, mitochondrial-like [Hyalella azteca]	Metabolism;Organismal Systems;Human Diseases;Human Diseases;Human Diseases;Human Diseases;Metabolism;Organismal Systems	Global and overview maps;Environmental adaptation;Neurodegenerative diseases;Neurodegenerative diseases;Endocrine and metabolic diseases;Neurodegenerative diseases;Energy metabolism;Nervous system	ko01100//Metabolic pathways;ko04714//Thermogenesis;ko05016//Huntington disease;ko05010//Alzheimer disease;ko04932//Non-alcoholic fatty liver disease (NAFLD);ko05012//Parkinson disease;ko00190//Oxidative phosphorylation;ko04723//Retrograde endocannabinoid signaling	K03936;K03936;K03936;K03936;K03936;K03936;K03936;K03936	-	GO:0016491//oxidoreductase activity	GO:0044710//single-organism metabolic process
0	ncbi_113818993	dnph1	0.762534291	0.435102787	0.809445958	1.24E-144	3.33E-140	dnph1	PREDICTED: 2'-deoxynucleoside 5'-phosphate N-hydrolase 1-like [Amphimedon queenslandica]	-	-	-	-	-	GO:0016798//hydrolase activity, acting on glycosyl bonds	GO:0055086//nucleobase-containing small molecule metabolic process
0	ncbi_113815788	TBCB	1.053934197	0.671145519	0.651087281	1.86E-144	4.98E-140	TBCB	PREDICTED: tubulin-folding cofactor B-like [Hyalella azteca]	-	-	-	-	GO:0005856//cytoskeleton;GO:0044444//cytoplasmic part	-	GO:0006457//protein folding;GO:0007275//multicellular organism development
0	ncbi_113809133	mRpL52	0.923614581	0.587450567	0.652823493	4.17E-144	1.12E-139	mRpL52	PREDICTED: 39S ribosomal protein L52, mitochondrial [Tribolium castaneum]	-	-	-	-	GO:0005840//ribosome	-	-
0	ncbi_113828978	psmg2	1.426197173	1.016494527	0.488571002	7.66E-144	2.05E-139	psmg2	PREDICTED: proteasome assembly chaperone 2-like [Hyalella azteca]	-	-	-	-	-	-	-
0	ncbi_113827259	Cbr1	1.624370525	1.203980076	0.432069237	1.05E-143	2.82E-139	Cbr1	Carbonyl reductase [NADPH] 1 [Zootermopsis nevadensis]	Metabolism;Human Diseases;Metabolism;Metabolism;Metabolism	Global and overview maps;Cancers;Xenobiotics biodegradation and metabolism;Lipid metabolism;Metabolism of cofactors and vitamins	ko01100//Metabolic pathways;ko05204//Chemical carcinogenesis;ko00980//Metabolism of xenobiotics by cytochrome P450;ko00590//Arachidonic acid metabolism;ko00790//Folate biosynthesis	K00079;K00079;K00079;K00079;K00079	-	-	-
0	ncbi_113803523	PARK7	1.030907154	0.669676338	0.622378508	1.07E-142	2.87E-138	PARK7	DJ-1 protein [Litopenaeus vannamei]	Human Diseases	Neurodegenerative diseases	ko05012//Parkinson disease	K05687	-	-	-
0	ncbi_113813429	NDUFA9	1.443855769	1.046776529	0.463973153	4.97E-142	1.33E-137	NDUFA9	NADH-ubiquinone oxidoreductase 39 kda subunit [Culex quinquefasciatus]	Metabolism;Organismal Systems;Human Diseases;Human Diseases;Human Diseases;Human Diseases;Metabolism;Organismal Systems	Global and overview maps;Environmental adaptation;Neurodegenerative diseases;Neurodegenerative diseases;Endocrine and metabolic diseases;Neurodegenerative diseases;Energy metabolism;Nervous system	ko01100//Metabolic pathways;ko04714//Thermogenesis;ko05016//Huntington disease;ko05010//Alzheimer disease;ko04932//Non-alcoholic fatty liver disease (NAFLD);ko05012//Parkinson disease;ko00190//Oxidative phosphorylation;ko04723//Retrograde endocannabinoid signaling	K03953;K03953;K03953;K03953;K03953;K03953;K03953;K03953	-	GO:0048037//cofactor binding	-
0	ncbi_113819439	PSMD4	1.700736091	1.261688192	0.430803877	2.89E-141	7.73E-137	PSMD4	26S proteasome non-ATPase regulatory subunit 4, partial [Trachymyrmex septentrionalis]	Human Diseases;Genetic Information Processing	Infectious diseases;Folding, sorting and degradation	ko05169//Epstein-Barr virus infection;ko03050//Proteasome	K03029;K03029	-	-	-
0	ncbi_113817987	ENY2	2.183369373	1.694567749	0.365638903	2.96E-141	7.93E-137	ENY2	PREDICTED: transcription and mRNA export factor ENY2 [Strongylocentrotus purpuratus]	-	-	-	-	GO:0046930//pore complex;GO:0070461//SAGA-type complex	GO:0003713//transcription coactivator activity	GO:0006354//DNA-templated transcription, elongation;GO:0006355//regulation of transcription, DNA-templated;GO:0006405//RNA export from nucleus;GO:0008104//protein localization;GO:0016570//histone modification
0	ncbi_113811531	CSTB	8.064998081	6.126942022	0.396506991	4.46E-141	1.19E-136	CSTB	PREDICTED: cystatin-B [Nipponia nippon]	-	-	-	-	-	-	-
0	ncbi_113809216	Atp6v1d	1.611303863	1.158372714	0.476129061	7.32E-141	1.96E-136	Atp6v1d	V-type proton ATPase subunit D [Monochamus alternatus]	Metabolism;Human Diseases;Cellular Processes;Environmental Information Processing;Human Diseases;Metabolism;Human Diseases;Organismal Systems;Human Diseases;Organismal Systems	Global and overview maps;Infectious diseases;Transport and catabolism;Signal transduction;Infectious diseases;Energy metabolism;Infectious diseases;Nervous system;Immune diseases;Excretory system	ko01100//Metabolic pathways;ko05165//Human papillomavirus infection;ko04145//Phagosome;ko04150//mTOR signaling pathway;ko05110//Vibrio cholerae infection;ko00190//Oxidative phosphorylation;ko05120//Epithelial cell signaling in Helicobacter pylori infection;ko04721//Synaptic vesicle cycle;ko05323//Rheumatoid arthritis;ko04966//Collecting duct acid secretion	K02149;K02149;K02149;K02149;K02149;K02149;K02149;K02149;K02149;K02149	-	-	-
0	ncbi_113829163	Pnpla1	1.001000624	0.660133946	0.600612182	1.77E-137	4.74E-133	Pnpla1	Patatin-like phospholipase domain-containing protein 2 [Ceratitis capitata]	-	-	-	-	-	-	-
0	ncbi_113828430	AAMP	0.689427678	0.465368685	0.567025086	1.19E-136	3.20E-132	AAMP	Angio-associated migratory cell protein [Daphnia magna]	-	-	-	-	-	-	-
0	ncbi_113824404	CG12975	1.358795144	1.002938192	0.438095269	1.36E-134	3.65E-130	CG12975	PREDICTED: multifunctional methyltransferase subunit TRM112-like protein [Hyalella azteca]	-	-	-	-	-	-	-
0	ncbi_113820598	MRPL46	0.892557718	0.598329299	0.577005754	4.27E-134	1.14E-129	MRPL46	PREDICTED: 39S ribosomal protein L46, mitochondrial-like [Limulus polyphemus]	-	-	-	-	-	-	-
0	ncbi_113826178	REXO2	1.617122904	1.24481949	0.377492776	3.24E-133	8.67E-129	REXO2	PREDICTED: oligoribonuclease, mitochondrial-like [Hyalella azteca]	Genetic Information Processing	Translation	ko03008//Ribosome biogenesis in eukaryotes	K13288	GO:0043231//intracellular membrane-bounded organelle	GO:0004527//exonuclease activity;GO:0097159//organic cyclic compound binding	GO:0006139//nucleobase-containing compound metabolic process
0	ncbi_113813684	ANKMY2	1.106102473	0.782263946	0.499757668	2.81E-132	7.53E-128	ANKMY2	PREDICTED: ankyrin repeat and MYND domain-containing protein 2-like [Hyalella azteca]	-	-	-	-	-	-	-
0	ncbi_113820582	Dohh	0.733579473	0.466322681	0.653624667	7.08E-131	1.90E-126	Dohh	PREDICTED: deoxyhypusine hydroxylase-like isoform X1 [Hyalella azteca]	-	-	-	-	-	GO:0016491//oxidoreductase activity	GO:0044710//single-organism metabolic process
0	ncbi_113817112	Immt	0.983570084	0.672684805	0.548097184	2.37E-129	6.33E-125	Immt	Mitochondrial inner membrane protein [Daphnia magna]	-	-	-	-	-	-	-
0	ncbi_113822389	ncbi_113822389	1.920238002	1.073155564	0.839425912	2.37E-128	6.34E-124	--	-	-	-	-	-	-	-	-
0	ncbi_113821240	ncbi_113821240	0.565570237	0.364288746	0.634623774	2.44E-128	6.53E-124	--	-	-	-	-	-	-	-	-
0	ncbi_113806389	RTRAF	1.450931355	1.097989806	0.402114605	2.61E-126	6.98E-122	RTRAF	PREDICTED: UPF0568 protein C14orf166 homolog isoform X1 [Hyalella azteca]	-	-	-	-	-	-	-
0	ncbi_113829226	Rpn8	2.080908878	1.611466436	0.368839652	5.18E-126	1.39E-121	Rpn8	regulatory particle non-ATPase 8, isoform A [Drosophila melanogaster]	Human Diseases;Genetic Information Processing	Infectious diseases;Folding, sorting and degradation	ko05169//Epstein-Barr virus infection;ko03050//Proteasome	K03038;K03038	GO:0005838//proteasome regulatory particle;GO:0043005//neuron projection	-	GO:0006511//ubiquitin-dependent protein catabolic process;GO:0030154//cell differentiation;GO:0051231//spindle elongation
0	ncbi_113826625	Pdcd5	1.690647925	1.302753282	0.376012362	1.49E-125	3.99E-121	Pdcd5	program cell death 5-like [Penaeus monodon]	-	-	-	-	-	-	-
0	ncbi_113817207	ncbi_113817207	1.220466238	0.90986622	0.423706043	1.77E-125	4.74E-121	--	activating transcription factor 4 [Litopenaeus vannamei]	-	-	-	-	-	-	-
0	ncbi_113828374	Gapdh	1.543701021	1.131822039	0.447746229	2.71E-124	7.27E-120	Gapdh	glyceraldehyde-3-phosphate-dehydrogenase [Cherax cainii]	Metabolism;Metabolism;Human Diseases;Metabolism;Metabolism;Environmental Information Processing	Global and overview maps;Global and overview maps;Neurodegenerative diseases;Carbohydrate metabolism;Global and overview maps;Signal transduction	ko01100//Metabolic pathways;ko01200//Carbon metabolism;ko05010//Alzheimer disease;ko00010//Glycolysis / Gluconeogenesis;ko01230//Biosynthesis of amino acids;ko04066//HIF-1 signaling pathway	K00134;K00134;K00134;K00134;K00134;K00134	GO:0044424//intracellular part	GO:0000166//nucleotide binding;GO:0016620//oxidoreductase activity, acting on the aldehyde or oxo group of donors, NAD or NADP as acceptor	GO:0006090//pyruvate metabolic process;GO:0019318//hexose metabolic process
0	ncbi_113818200	RPL30	2.275202982	1.777074198	0.356491342	3.03E-124	8.11E-120	RPL30	ribosomal protein L30 [Argopecten irradians]	Genetic Information Processing	Translation	ko03010//Ribosome	K02908	-	-	-
0	ncbi_113809115	ncbi_113809115	0.787094775	0.523409169	0.588598167	1.89E-123	5.05E-119	--	-	-	-	-	-	-	-	-
0	ncbi_113807315	IscW_ISCW007295	1.498600013	1.090895003	0.458103118	2.92E-123	7.82E-119	IscW_ISCW007295	PREDICTED: 1,2-dihydroxy-3-keto-5-methylthiopentene dioxygenase-like [Papilio machaon]	Metabolism;Metabolism	Global and overview maps;Amino acid metabolism	ko01100//Metabolic pathways;ko00270//Cysteine and methionine metabolism	K08967;K08967	GO:0043231//intracellular membrane-bounded organelle	GO:0016702//oxidoreductase activity, acting on single donors with incorporation of molecular oxygen, incorporation of two atoms of oxygen;GO:0043169//cation binding	GO:0071267//L-methionine salvage
0	ncbi_113819698	CMC1	0.908073467	0.620492971	0.549394154	1.14E-122	3.04E-118	CMC1	PREDICTED: COX assembly mitochondrial protein homolog [Nicrophorus vespilloides]	-	-	-	-	-	-	-
0	ncbi_113807167	Ssrp	0.720120309	0.47199768	0.609458187	1.42E-122	3.81E-118	Ssrp	PREDICTED: FACT complex subunit Ssrp1-like [Hyalella azteca]	-	-	-	-	-	-	-
0	ncbi_113829162	PDCL3	1.676748725	1.299819707	0.367354978	1.48E-122	3.96E-118	PDCL3	PREDICTED: viral IAP-associated factor homolog [Hyalella azteca]	-	-	-	-	-	-	-
0	ncbi_113804724	porin	1.190049177	0.815467361	0.545322153	1.59E-122	4.26E-118	porin	voltage-dependent anion-selective channel [Eriocheir sinensis]	Human Diseases;Human Diseases;Environmental Information Processing;Cellular Processes;Human Diseases;Environmental Information Processing;Cellular Processes;Organismal Systems;Organismal Systems;Cellular Processes	Neurodegenerative diseases;Infectious diseases;Signal transduction;Cell growth and death;Neurodegenerative diseases;Signal transduction;Cell growth and death;Immune system;Digestive system;Cell growth and death	ko05016//Huntington disease;ko05166//HTLV-I infection;ko04022//cGMP - PKG signaling pathway;ko04217//Necroptosis;ko05012//Parkinson disease;ko04020//Calcium signaling pathway;ko04218//Cellular senescence;ko04621//NOD-like receptor signaling pathway;ko04979//Cholesterol metabolism;ko04216//Ferroptosis	K15040;K15040;K15040;K15040;K15040;K15040;K15040;K15040;K15040;K15040	-	GO:0005244//voltage-gated ion channel activity	GO:0006820//anion transport;GO:0034765//regulation of ion transmembrane transport
0	ncbi_113809654	ncbi_113809654	0.99738449	0.657311642	0.601572231	5.14E-121	1.38E-116	--	PREDICTED: proteoglycan 4-like [Hyalella azteca]	-	-	-	-	-	-	-
0	ncbi_113804131	G3BP2	1.754527324	1.344841977	0.383645754	6.85E-120	1.83E-115	G3BP2	PREDICTED: ras GTPase-activating protein-binding protein 2 [Tribolium castaneum]	-	-	-	-	-	-	-
0	ncbi_113804464	naa20	1.048098297	0.737987925	0.506104911	3.74E-119	1.00E-114	naa20	N-alpha-acetyltransferase 20, partial [Stegodyphus mimosarum]	-	-	-	-	-	-	-
0	ncbi_113806100	ncbi_113806100	1.257028737	0.907564593	0.4699454	4.48E-118	1.20E-113	--	PREDICTED: uncharacterized protein LOC108666374 [Hyalella azteca]	-	-	-	-	-	-	-
0	ncbi_113812357	GCSH	0.86790531	0.592373215	0.551031241	3.92E-117	1.05E-112	GCSH	PREDICTED: glycine cleavage system H protein, mitochondrial-like, partial [Hyalella azteca]	Metabolism;Metabolism;Metabolism;Metabolism	Global and overview maps;Global and overview maps;Amino acid metabolism;Carbohydrate metabolism	ko01100//Metabolic pathways;ko01200//Carbon metabolism;ko00260//Glycine, serine and threonine metabolism;ko00630//Glyoxylate and dicarboxylate metabolism	K02437;K02437;K02437;K02437	-	-	GO:0006546//glycine catabolic process
0	ncbi_113815035	ITA	1.613562041	1.193640738	0.434880371	1.54E-115	4.13E-111	ITA	inhibitor of apoptosis protein [Litopenaeus vannamei]	Human Diseases;Cellular Processes;Cellular Processes;Environmental Information Processing;Genetic Information Processing;Human Diseases;Cellular Processes;Human Diseases;Human Diseases;Organismal Systems;Human Diseases;Environmental Information Processing;Cellular Processes;Organismal Systems;Environmental Information Processing	Cancers;Cellular community - eukaryotes;Cell growth and death;Signal transduction;Folding, sorting and degradation;Cancers;Cell growth and death;Drug resistance;Infectious diseases;Immune system;Cancers;Signal transduction;Cell growth and death;Immune system;Signal transduction	ko05200//Pathways in cancer;ko04510//Focal adhesion;ko04210//Apoptosis;ko04390//Hippo signaling pathway;ko04120//Ubiquitin mediated proteolysis;ko05202//Transcriptional misregulation in cancers;ko04217//Necroptosis;ko01524//Platinum drug resistance;ko05145//Toxoplasmosis;ko04621//NOD-like receptor signaling pathway;ko05222//Small cell lung cancer;ko04668//TNF signaling pathway;ko04215//Apoptosis …	K16060;K16060;K16060;K16060;K16060;K16060;K16060;K16060;K16060;K16060;K16060;K16060;K16060;K16060;K16060	-	-	-
0	ncbi_113812059	ncbi_113812059	1.052611506	0.732338587	0.52339035	1.08E-114	2.89E-110	--	-	-	-	-	-	-	-	-
0	ncbi_113810206	Klhdc4	0.657547458	0.426661251	0.624003931	1.85E-114	4.94E-110	Klhdc4	Kelch domain-containing protein 4 [Zootermopsis nevadensis]	-	-	-	-	-	-	-
0	ncbi_113821210	ncbi_113821210	0.706044494	0.451091303	0.646339632	2.19E-114	5.86E-110	--	PREDICTED: uncharacterized protein LOC108675046 [Hyalella azteca]	-	-	-	-	-	-	-
0	ncbi_113828445	atp6v1c1a	0.991870062	0.691215435	0.521015701	8.68E-114	2.32E-109	atp6v1c1a	vacuolar-H-ATPase subunit C [Cherax quadricarinatus]	Metabolism;Human Diseases;Cellular Processes;Environmental Information Processing;Human Diseases;Metabolism;Human Diseases;Organismal Systems;Human Diseases;Organismal Systems	Global and overview maps;Infectious diseases;Transport and catabolism;Signal transduction;Infectious diseases;Energy metabolism;Infectious diseases;Nervous system;Immune diseases;Excretory system	ko01100//Metabolic pathways;ko05165//Human papillomavirus infection;ko04145//Phagosome;ko04150//mTOR signaling pathway;ko05110//Vibrio cholerae infection;ko00190//Oxidative phosphorylation;ko05120//Epithelial cell signaling in Helicobacter pylori infection;ko04721//Synaptic vesicle cycle;ko05323//Rheumatoid arthritis;ko04966//Collecting duct acid secretion	K02148;K02148;K02148;K02148;K02148;K02148;K02148;K02148;K02148;K02148	-	-	-
0	ncbi_113827080	tko	0.677641458	0.429538727	0.657733933	2.78E-113	7.45E-109	tko	PREDICTED: 40S ribosomal protein S12, mitochondrial [Cimex lectularius]	Genetic Information Processing	Translation	ko03010//Ribosome	K02950	GO:0044391//ribosomal subunit	-	GO:0010467//gene expression
0	ncbi_113813479	znf593	0.693680585	0.45915825	0.595280039	1.39E-112	3.72E-108	znf593	PREDICTED: zinc finger protein 593 homolog [Trachymyrmex cornetzi]	-	-	-	-	-	-	-
0	ncbi_113809991	ImpL3	0.946522114	0.611799827	0.629576515	1.33E-111	3.55E-107	ImpL3	lactate dehydrogenase [Litopenaeus vannamei]	Metabolism;Metabolism;Environmental Information Processing;Organismal Systems;Human Diseases;Metabolism;Metabolism;Metabolism	Global and overview maps;Carbohydrate metabolism;Signal transduction;Endocrine system;Cancers;Amino acid metabolism;Carbohydrate metabolism;Carbohydrate metabolism	ko01100//Metabolic pathways;ko00010//Glycolysis / Gluconeogenesis;ko04066//HIF-1 signaling pathway;ko04922//Glucagon signaling pathway;ko05230//Central carbon metabolism in cancer;ko00270//Cysteine and methionine metabolism;ko00620//Pyruvate metabolism;ko00640//Propanoate metabolism	K00016;K00016;K00016;K00016;K00016;K00016;K00016;K00016	GO:0044424//intracellular part	GO:0004457//lactate dehydrogenase activity	GO:0005975//carbohydrate metabolic process;GO:0044710//single-organism metabolic process
0	ncbi_113829138	Mrpl43	0.761683807	0.495380298	0.620655736	3.71E-111	9.95E-107	Mrpl43	Mitochondrial ribosomal protein L43 [Daphnia magna]	-	-	-	-	-	-	-
0	ncbi_113806677	porin	1.385202846	1.006674038	0.460500644	4.99E-111	1.34E-106	porin	voltage-dependent anion-selective channel [Eriocheir sinensis]	Human Diseases;Human Diseases;Environmental Information Processing;Cellular Processes;Human Diseases;Environmental Information Processing;Cellular Processes;Organismal Systems;Organismal Systems;Cellular Processes	Neurodegenerative diseases;Infectious diseases;Signal transduction;Cell growth and death;Neurodegenerative diseases;Signal transduction;Cell growth and death;Immune system;Digestive system;Cell growth and death	ko05016//Huntington disease;ko05166//HTLV-I infection;ko04022//cGMP - PKG signaling pathway;ko04217//Necroptosis;ko05012//Parkinson disease;ko04020//Calcium signaling pathway;ko04218//Cellular senescence;ko04621//NOD-like receptor signaling pathway;ko04979//Cholesterol metabolism;ko04216//Ferroptosis	K15040;K15040;K15040;K15040;K15040;K15040;K15040;K15040;K15040;K15040	-	GO:0005244//voltage-gated ion channel activity	GO:0006820//anion transport;GO:0034765//regulation of ion transmembrane transport
0	ncbi_113808586	TMEM199	1.286966172	0.947970644	0.441059845	1.05E-110	2.80E-106	TMEM199	PREDICTED: transmembrane protein 199-like [Hyalella azteca]	-	-	-	-	-	-	-
0	ncbi_113812324	ncbi_113812324	1.013753529	0.695629095	0.543316757	1.46E-110	3.90E-106	--	PREDICTED: rac-like GTP-binding protein ARAC7 [Crassostrea gigas]	-	-	-	-	-	-	-
0	ncbi_113815938	HARS	0.704361037	0.46529502	0.59816936	3.91E-110	1.05E-105	HARS	PREDICTED: histidine--tRNA ligase, cytoplasmic-like isoform X2 [Hyalella azteca]	Genetic Information Processing	Translation	ko00970//Aminoacyl-tRNA biosynthesis	K01892	-	-	-
0	ncbi_113826862	Ltv1	0.628788204	0.425459283	0.563553082	8.11E-109	2.17E-104	Ltv1	PREDICTED: protein LTV1 homolog [Wasmannia auropunctata]	-	-	-	-	-	-	-
0	ncbi_113815850	PHF5A	1.108839354	0.820392888	0.434663476	1.20E-108	3.22E-104	PHF5A	PREDICTED: PHD finger-like domain-containing protein 5A [Hyalella azteca]	Genetic Information Processing	Transcription	ko03040//Spliceosome	K12834	-	GO:0016741//transferase activity, transferring one-carbon groups	GO:0008152//metabolic process
0	ncbi_113803773	Non3	0.602991199	0.395737777	0.607592154	6.79E-108	1.82E-103	Non3	Brix domain-containing protein 1 [Zootermopsis nevadensis]	-	-	-	-	-	-	-
0	ncbi_113807055	Rwdd1	0.675696533	0.441052122	0.615426292	1.28E-107	3.43E-103	Rwdd1	small androgen receptor-interacting protein 1 [Penaeus monodon]	-	-	-	-	-	-	-
0	ncbi_113813043	NSFL1C	1.11319664	0.797794604	0.480619189	2.10E-106	5.62E-102	NSFL1C	PREDICTED: NSFL1 cofactor p47-like [Hyalella azteca]	Genetic Information Processing	Folding, sorting and degradation	ko04141//Protein processing in endoplasmic reticulum	K14012	-	-	-
0	ncbi_113800526	ncbi_113800526	0.526597137	0.315184756	0.740501919	8.88E-106	2.38E-101	--	-	-	-	-	-	-	-	-
0	ncbi_113807663	Galr2	0.579567926	0.365837638	0.663774248	3.42E-105	9.17E-101	Galr2	PREDICTED: G-protein coupled receptor moody-like [Parasteatoda tepidariorum]	Environmental Information Processing	Signaling molecules and interaction	ko04080//Neuroactive ligand-receptor interaction	K05053	-	-	-
0	ncbi_113826749	Aats-gln	0.633837561	0.399670885	0.665300677	5.06E-105	1.36E-100	Aats-gln	PREDICTED: glutamine--tRNA ligase-like isoform X1 [Hyalella azteca]	Metabolism;Genetic Information Processing	Global and overview maps;Translation	ko01100//Metabolic pathways;ko00970//Aminoacyl-tRNA biosynthesis	K01886;K01886	-	GO:0004812//aminoacyl-tRNA ligase activity	GO:0006418//tRNA aminoacylation for protein translation
0	ncbi_113801962	NUDC	1.146051737	0.851440299	0.428694894	2.13E-104	5.70E-100	NUDC	PREDICTED: nuclear migration protein nudC [Macaca fascicularis]	-	-	-	-	-	-	-
0	ncbi_113818688	MAP2K7	0.635728568	0.418097148	0.604572717	3.32E-104	8.88E-100	MAP2K7	mitogen-activated protein kinase kinase 7 [Litopenaeus vannamei]	Genetic Information Processing;Cellular Processes;Environmental Information Processing;Human Diseases;Human Diseases;Environmental Information Processing;Human Diseases;Cellular Processes;Organismal Systems;Organismal Systems;Human Diseases;Environmental Information Processing;Organismal Systems;Organismal Systems;Environmental Information Processing;Organismal Systems;Organismal Systems;Organism…	Folding, sorting and degradation;Cellular community - eukaryotes;Signal transduction;Infectious diseases;Cardiovascular diseases;Signal transduction;Infectious diseases;Cell growth and death;Endocrine system;Nervous system;Infectious diseases;Signal transduction;Endocrine system;Immune system;Signal transduction;Immune system;Immune system;Development;Immune system	ko04141//Protein processing in endoplasmic reticulum;ko04530//Tight junction;ko04013//MAPK signaling pathway - fly;ko05164//Influenza A;ko05418//Fluid shear stress and atherosclerosis;ko04010//MAPK signaling pathway;ko05169//Epstein-Barr virus infection;ko04214//Apoptosis - fly;ko04926//Relaxin signaling pathway;ko04722//Neurotrophin signaling pathway;ko05167//Kaposi sarcoma-associated herpesviru…	K04431;K04431;K04431;K04431;K04431;K04431;K04431;K04431;K04431;K04431;K04431;K04431;K04431;K04431;K04431;K04431;K04431;K04431;K04431	-	-	-
0	ncbi_113826211	eif3k	1.760793393	1.297337682	0.440671592	3.15E-103	8.42E-99	eif3k	eukaryotic translation initiation factor 3 subunit 12 [Procambarus clarkii]	-	-	-	-	GO:0043234//protein complex;GO:0070993//translation preinitiation complex	GO:0008135//translation factor activity, RNA binding;GO:0043021//ribonucleoprotein complex binding	GO:0006417//regulation of translation
0	ncbi_113817375	POLR2H	1.16118285	0.877720082	0.403762349	1.02E-102	2.74E-98	POLR2H	PREDICTED: DNA-directed RNA polymerases I, II, and III subunit RPABC3-like [Hyalella azteca]	Metabolism;Human Diseases;Metabolism;Human Diseases;Metabolism;Genetic Information Processing;Organismal Systems	Global and overview maps;Neurodegenerative diseases;Nucleotide metabolism;Infectious diseases;Nucleotide metabolism;Transcription;Immune system	ko01100//Metabolic pathways;ko05016//Huntington disease;ko00230//Purine metabolism;ko05169//Epstein-Barr virus infection;ko00240//Pyrimidine metabolism;ko03020//RNA polymerase;ko04623//Cytosolic DNA-sensing pathway	K03016;K03016;K03016;K03016;K03016;K03016;K03016	-	-	-
0	ncbi_113813284	ncbi_113813284	1.311382324	0.842865451	0.637714102	1.73E-102	4.63E-98	--	-	-	-	-	-	-	-	-
0	ncbi_113807991	Cisd2	0.815402154	0.546117936	0.578299229	2.53E-102	6.79E-98	Cisd2	PREDICTED: CDGSH iron-sulfur domain-containing protein 2 homolog B-like [Hyalella azteca]	-	-	-	-	-	-	-
0	ncbi_113810556	CG6712	0.668013807	0.462331939	0.530948892	2.91E-102	7.81E-98	CG6712	PREDICTED: ribosome production factor 1-like [Limulus polyphemus]	-	-	-	-	-	-	-
0	ncbi_113803439	EEF1E1	0.856090373	0.599532656	0.513924763	4.20E-102	1.13E-97	EEF1E1	eukaryotic translation elongation factor 1 epsilon 1, partial [Scylla paramamosain]	-	-	-	-	-	-	GO:0009987//cellular process
0	ncbi_113803087	Txn2	1.218139447	0.909521779	0.421499207	5.34E-102	1.43E-97	Txn2	thioredoxin [Scylla paramamosain]	Human Diseases;Organismal Systems	Cardiovascular diseases;Immune system	ko05418//Fluid shear stress and atherosclerosis;ko04621//NOD-like receptor signaling pathway	K03671;K03671	-	GO:0015036//disulfide oxidoreductase activity	GO:0019725//cellular homeostasis;GO:0044710//single-organism metabolic process
0	ncbi_113811048	ncbi_113811048	0.76757857	0.483416423	0.667047946	1.65E-101	4.42E-97	--	PREDICTED: NADH dehydrogenase [ubiquinone] flavoprotein 3, mitochondrial [Halyomorpha halys]	-	-	-	-	-	-	-
0	ncbi_113817101	ncbi_113817101	0.913923913	0.643138611	0.506944356	1.47E-100	3.95E-96	--	-	-	-	-	-	-	-	-
0	ncbi_113825702	NDUFA12	1.363138964	1.061586389	0.360710865	2.05E-100	5.49E-96	NDUFA12	Probable NADH dehydrogenase 1 alpha subcomplex subunit 12 [Caligus rogercresseyi]	Metabolism;Organismal Systems;Human Diseases;Human Diseases;Human Diseases;Human Diseases;Metabolism;Organismal Systems	Global and overview maps;Environmental adaptation;Neurodegenerative diseases;Neurodegenerative diseases;Endocrine and metabolic diseases;Neurodegenerative diseases;Energy metabolism;Nervous system	ko01100//Metabolic pathways;ko04714//Thermogenesis;ko05016//Huntington disease;ko05010//Alzheimer disease;ko04932//Non-alcoholic fatty liver disease (NAFLD);ko05012//Parkinson disease;ko00190//Oxidative phosphorylation;ko04723//Retrograde endocannabinoid signaling	K11352;K11352;K11352;K11352;K11352;K11352;K11352;K11352	-	-	-
0	ncbi_113799969	PXN	0.594816483	0.385137688	0.627070321	2.83E-100	7.57E-96	PXN	PREDICTED: paxillin-like isoform X2 [Hyalella azteca]	-	-	-	-	-	-	-
0	ncbi_113820990	CG40127	1.178251032	0.844833822	0.479907448	8.85E-100	2.37E-95	CG40127	PREDICTED: ribonuclease kappa-B-like [Hyalella azteca]	-	-	-	-	-	-	-
0	ncbi_113821209	MRPS18B	0.75252249	0.511045058	0.558284202	9.97E-100	2.67E-95	MRPS18B	PREDICTED: 28S ribosomal protein S18b, mitochondrial [Drosophila arizonae]	Human Diseases	Cancers	ko05203//Viral carcinogenesis	K16174	GO:0005622//intracellular	GO:0005198//structural molecule activity	GO:0010467//gene expression
0	ncbi_113802017	sbds	0.678009953	0.451593314	0.586282324	2.99E-99	7.99E-95	sbds	PREDICTED: ribosome maturation protein SBDS [Maylandia zebra]	Genetic Information Processing	Translation	ko03008//Ribosome biogenesis in eukaryotes	K14574	-	-	-
0	ncbi_113814572	VhaAC39-1	1.321639498	0.988841592	0.418517376	6.88E-99	1.84E-94	VhaAC39-1	V-ATPase subunit d [Portunus trituberculatus]	Metabolism;Human Diseases;Cellular Processes;Cellular Processes;Human Diseases;Human Diseases;Metabolism;Human Diseases;Human Diseases;Organismal Systems;Human Diseases;Organismal Systems	Global and overview maps;Infectious diseases;Transport and catabolism;Transport and catabolism;Cancers;Infectious diseases;Energy metabolism;Infectious diseases;Infectious diseases;Nervous system;Immune diseases;Excretory system	ko01100//Metabolic pathways;ko05165//Human papillomavirus infection;ko04145//Phagosome;ko04142//Lysosome;ko05203//Viral carcinogenesis;ko05110//Vibrio cholerae infection;ko00190//Oxidative phosphorylation;ko05152//Tuberculosis;ko05120//Epithelial cell signaling in Helicobacter pylori infection;ko04721//Synaptic vesicle cycle;ko05323//Rheumatoid arthritis;ko04966//Collecting duct acid secretion	K02146;K02146;K02146;K02146;K02146;K02146;K02146;K02146;K02146;K02146;K02146;K02146	GO:0033179//proton-transporting V-type ATPase, V0 domain	GO:0015078//hydrogen ion transmembrane transporter activity	GO:0007219//Notch signaling pathway;GO:0015988//energy coupled proton transmembrane transport, against electrochemical gradient;GO:0051452//intracellular pH reduction
0	ncbi_113799956	Cblb	0.738163263	0.546818104	0.432878931	1.50E-98	4.02E-94	Cblb	PREDICTED: E3 ubiquitin-protein ligase CBL-B-like isoform X1 [Hyalella azteca]	Human Diseases;Human Diseases;Cellular Processes;Genetic Information Processing;Human Diseases;Organismal Systems;Environmental Information Processing;Human Diseases	Cancers;Cancers;Transport and catabolism;Folding, sorting and degradation;Infectious diseases;Endocrine system;Signal transduction;Cancers	ko05200//Pathways in cancer;ko05205//Proteoglycans in cancer;ko04144//Endocytosis;ko04120//Ubiquitin mediated proteolysis;ko05100//Bacterial invasion of epithelial cells;ko04910//Insulin signaling pathway;ko04012//ErbB signaling pathway;ko05220//Chronic myeloid leukemia	K04707;K04707;K04707;K04707;K04707;K04707;K04707;K04707	GO:0043231//intracellular membrane-bounded organelle	GO:0019787//ubiquitin-like protein transferase activity;GO:0046914//transition metal ion binding;GO:0060089//molecular transducer activity	GO:0007165//signal transduction;GO:0032446//protein modification by small protein conjugation
0	ncbi_113803667	serpinb1	2.117161654	1.627291524	0.379658701	1.62E-98	4.35E-94	serpinb1	serine proteinase inhibitor [Litopenaeus vannamei]	Human Diseases	Infectious diseases	ko05146//Amoebiasis	K13963	-	-	-
0	ncbi_113829112	Abce1	0.752668291	0.50855338	0.56561498	1.71E-98	4.58E-94	Abce1	PREDICTED: ATP-binding cassette sub-family E member 1-like [Hyalella azteca]	-	-	-	-	-	GO:0017111//nucleoside-triphosphatase activity;GO:0032550//purine ribonucleoside binding;GO:0051540//metal cluster binding	-
0	ncbi_113822410	mRpL35	0.923585698	0.658012645	0.489130525	2.33E-98	6.25E-94	mRpL35	PREDICTED: 39S ribosomal protein L35, mitochondrial-like isoform X2 [Bactrocera oleae]	Genetic Information Processing	Translation	ko03010//Ribosome	K02916	-	-	-
0	ncbi_113815039	Lyar	0.697659714	0.465784308	0.582861492	2.64E-98	7.06E-94	Lyar	Zgc:65749 [Danio rerio]	-	-	-	-	-	-	-
0	ncbi_113825275	NIFK	0.554277438	0.377665738	0.553498375	2.12E-97	5.67E-93	NIFK	PREDICTED: MKI67 FHA domain-interacting nucleolar phosphoprotein [Cerapachys biroi]	-	-	-	-	-	-	-
0	ncbi_113803701	MRTO4	0.552900135	0.349719362	0.660821253	3.06E-97	8.19E-93	MRTO4	mRNA turnover protein 4 [Daphnia magna]	-	-	-	-	-	-	-
0	ncbi_113806735	PARVB	0.761469732	0.514044209	0.566894251	3.13E-97	8.39E-93	PARVB	Beta-parvin [Zootermopsis nevadensis]	Cellular Processes	Cellular community - eukaryotes	ko04510//Focal adhesion	K06275	-	-	-
0	ncbi_113803693	ncbi_113803693	0.761279749	0.520605251	0.548236839	1.28E-96	3.42E-92	--	PREDICTED: tripartite motif-containing protein 65-like [Hyalella azteca]	-	-	-	-	-	-	GO:0002376//immune system process;GO:0048513//animal organ development;GO:0065007//biological regulation
0	ncbi_113824546	D10Jhu81e	0.894928468	0.632175652	0.501446901	1.74E-96	4.66E-92	D10Jhu81e	PREDICTED: ES1 protein homolog, mitochondrial-like [Hyalella azteca]	-	-	-	-	GO:0043231//intracellular membrane-bounded organelle	-	-
0	ncbi_113816597	Acot13	1.333632933	1.005201165	0.407877387	6.34E-96	1.70E-91	Acot13	thioesterase superfamily member 2 [Fenneropenaeus chinensis]	-	-	-	-	GO:0031988//membrane-bounded vesicle;GO:0043231//intracellular membrane-bounded organelle	GO:0016289//CoA hydrolase activity	GO:0051260//protein homooligomerization
0	ncbi_113808513	ZNF706	1.32003458	1.017756219	0.375183686	2.37E-95	6.35E-91	ZNF706	PREDICTED: zinc finger protein 706-like [Hyalella azteca]	-	-	-	-	-	-	-
0	ncbi_113826212	eif3k	1.508377346	1.051766281	0.520183238	3.61E-95	9.68E-91	eif3k	eukaryotic translation initiation factor 3 subunit 12 [Procambarus clarkii]	-	-	-	-	GO:0043234//protein complex;GO:0070993//translation preinitiation complex	GO:0008135//translation factor activity, RNA binding;GO:0043021//ribonucleoprotein complex binding	GO:0006417//regulation of translation
0	ncbi_113809246	GINS3	1.036979936	0.768849645	0.431614581	3.71E-95	9.93E-91	GINS3	PREDICTED: DNA replication complex GINS protein PSF3-like [Hyalella azteca]	-	-	-	-	-	-	-
0	ncbi_113827260	MRPS33	0.795775586	0.545486384	0.544818454	1.42E-94	3.81E-90	MRPS33	mitochondrial 28S ribosomal protein S33 [Artemia franciscana]	-	-	-	-	-	-	-
0	ncbi_113811387	Pes1	0.59150886	0.40392831	0.550300514	2.41E-94	6.46E-90	Pes1	PREDICTED: pescadillo-like [Limulus polyphemus]	-	-	-	-	-	-	-
0	ncbi_113823745	rars	0.594324099	0.398876917	0.575306243	4.08E-94	1.09E-89	rars	PREDICTED: arginine--tRNA ligase, cytoplasmic-like [Hyalella azteca]	Genetic Information Processing	Translation	ko00970//Aminoacyl-tRNA biosynthesis	K01887	-	-	-
0	ncbi_113807092	glrx5	1.546514037	1.165269872	0.408355812	6.21E-94	1.66E-89	glrx5	PREDICTED: glutaredoxin-related protein 5, mitochondrial-like [Hyalella azteca]	-	-	-	-	-	GO:0015036//disulfide oxidoreductase activity	GO:0019725//cellular homeostasis;GO:0044710//single-organism metabolic process
0	ncbi_113822031	Pwp1	0.628298618	0.424300991	0.566362358	1.13E-92	3.02E-88	Pwp1	Periodic tryptophan protein 1-like protein [Zootermopsis nevadensis]	-	-	-	-	-	-	-
0	ncbi_113829206	ncbi_113829206	1.030073223	0.761436343	0.435951559	6.98E-92	1.87E-87	--	PREDICTED: ribonuclease H2 subunit C-like [Hyalella azteca]	Genetic Information Processing	Replication and repair	ko03030//DNA replication	K10745	-	-	-
0	ncbi_113808397	ncbi_113808397	0.998599476	0.758327019	0.397086023	7.95E-92	2.13E-87	--	PREDICTED: polyadenylate-binding protein-interacting protein 1-like isoform X2 [Parasteatoda tepidariorum]	Genetic Information Processing	Translation	ko03013//RNA transport	K14322	-	-	-
0	ncbi_113810041	CG11007	0.896882954	0.638054911	0.491239135	2.79E-91	7.46E-87	CG11007	PREDICTED: thioredoxin-related transmembrane protein 2 homolog [Hyalella azteca]	-	-	-	-	-	-	-
0	ncbi_113802409	Pdhx	0.871125659	0.631785415	0.463446209	5.38E-91	1.44E-86	Pdhx	PREDICTED: pyruvate dehydrogenase protein X component-like isoform X1 [Hyalella azteca]	Metabolism;Metabolism;Metabolism;Metabolism;Metabolism	Global and overview maps;Global and overview maps;Carbohydrate metabolism;Carbohydrate metabolism;Carbohydrate metabolism	ko01100//Metabolic pathways;ko01200//Carbon metabolism;ko00010//Glycolysis / Gluconeogenesis;ko00020//Citrate cycle (TCA cycle);ko00620//Pyruvate metabolism	K00627;K00627;K00627;K00627;K00627	-	-	-
0	ncbi_113817105	Crk	0.805574422	0.600906521	0.422877298	1.11E-90	2.98E-86	Crk	PREDICTED: adapter molecule Crk-like isoform X1 [Apis dorsata]	-	-	-	-	-	-	-
0	ncbi_113824350	BTG1	1.004353497	0.770207913	0.382947286	7.76E-90	2.08E-85	BTG1	BTG1-like protein [Coptotermes formosanus]	Genetic Information Processing	Folding, sorting and degradation	ko03018//RNA degradation	K14443	-	-	-
0	ncbi_113803774	Vars	0.856136115	0.613023343	0.481898175	2.33E-89	6.23E-85	Vars	PREDICTED: valine--tRNA ligase isoform X1 [Neodiprion lecontei]	Genetic Information Processing	Translation	ko00970//Aminoacyl-tRNA biosynthesis	K01873	-	GO:0004812//aminoacyl-tRNA ligase activity	GO:0006418//tRNA aminoacylation for protein translation
0	ncbi_113816315	BMPER	0.633479767	0.40201339	0.656054987	4.50E-89	1.21E-84	BMPER	PREDICTED: BMP-binding endothelial regulator protein-like [Parasteatoda tepidariorum]	-	-	-	-	-	-	-
0	ncbi_113818896	PTRH2	1.163681413	0.897430827	0.374823491	6.81E-89	1.82E-84	PTRH2	PREDICTED: peptidyl-tRNA hydrolase 2, mitochondrial-like [Hyalella azteca]	-	-	-	-	GO:0044444//cytoplasmic part	-	GO:0008152//metabolic process;GO:0042981//regulation of apoptotic process;GO:0048519//negative regulation of biological process
0	ncbi_113815336	ncbi_113815336	0.943424158	0.694595104	0.441734303	9.74E-89	2.61E-84	--	PREDICTED: LOW QUALITY PROTEIN: titin-like [Megachile rotundata]	-	-	-	-	-	-	-
0	ncbi_113805928	Mrpl14	0.750493801	0.509645009	0.558347463	1.15E-88	3.07E-84	Mrpl14	mitochondrial ribosomal protein L14 [Anopheles darlingi]	Genetic Information Processing	Translation	ko03010//Ribosome	K02874	GO:0000315//organellar large ribosomal subunit	GO:0005198//structural molecule activity	GO:0010467//gene expression
0	ncbi_113815513	bonsai	0.787238276	0.558967132	0.494036913	1.36E-88	3.65E-84	bonsai	PREDICTED: 28S ribosomal protein S15, mitochondrial-like [Aethina tumida]	Genetic Information Processing	Translation	ko03010//Ribosome	K02956	-	-	-
0	ncbi_113819920	coa5	0.859027759	0.630934943	0.445213497	1.44E-88	3.84E-84	coa5	PREDICTED: cytochrome c oxidase assembly factor 5-like [Limulus polyphemus]	Organismal Systems	Environmental adaptation	ko04714//Thermogenesis	K18178	-	GO:0017111//nucleoside-triphosphatase activity;GO:0097159//organic cyclic compound binding;GO:1901363//heterocyclic compound binding	-
0	ncbi_113818566	BRIX1	0.667493978	0.460386762	0.535908472	1.46E-88	3.90E-84	BRIX1	PREDICTED: ribosome biogenesis protein BRX1 homolog [Lingula anatina]	-	-	-	-	-	-	-
0	ncbi_113803186	nip7	0.52471793	0.342299305	0.616283727	4.85E-88	1.30E-83	nip7	PREDICTED: 60S ribosome subunit biogenesis protein NIP7 homolog [Hydra vulgaris]	-	-	-	-	GO:0043231//intracellular membrane-bounded organelle	GO:0003723//RNA binding	GO:0022618//ribonucleoprotein complex assembly
0	ncbi_113816902	mRpS16	0.704223359	0.469317559	0.585468643	5.06E-88	1.35E-83	mRpS16	28S ribosomal protein S16 [Culex quinquefasciatus]	Genetic Information Processing	Translation	ko03010//Ribosome	K02959	GO:0000314//organellar small ribosomal subunit	GO:0005198//structural molecule activity	GO:0010467//gene expression
0	ncbi_113824941	ncbi_113824941	0.818649226	0.575262521	0.509024938	9.38E-88	2.51E-83	--	PREDICTED: 28S ribosomal protein S36, mitochondrial isoform X1 [Trachymyrmex septentrionalis]	-	-	-	-	-	-	-
0	ncbi_113805591	ncbi_113805591	0.530115341	0.338877139	0.645543978	4.79E-87	1.28E-82	--	PREDICTED: CDGSH iron-sulfur domain-containing protein 3, mitochondrial [Diachasma alloeum]	-	-	-	-	-	-	-
0	ncbi_113807597	ncbi_113807597	1.088884092	0.834955538	0.383079111	6.04E-86	1.62E-81	--	-	-	-	-	-	-	-	-
0	ncbi_113830443	eif2a	0.648214263	0.453153406	0.516471236	3.64E-85	9.74E-81	eif2a	PREDICTED: eukaryotic translation initiation factor 2A-like [Hyalella azteca]	-	-	-	-	-	GO:0005488//binding	GO:0010467//gene expression;GO:0044238//primary metabolic process;GO:0044260//cellular macromolecule metabolic process;GO:0050789//regulation of biological process
0	ncbi_113817644	PDHB	1.180747929	0.908125015	0.378738183	3.75E-85	1.00E-80	PDHB	Pyruvate dehydrogenase E1 component subunit beta, mitochondrial [Zootermopsis nevadensis]	Metabolism;Metabolism;Metabolism;Environmental Information Processing;Organismal Systems;Human Diseases;Metabolism;Metabolism	Global and overview maps;Global and overview maps;Carbohydrate metabolism;Signal transduction;Endocrine system;Cancers;Carbohydrate metabolism;Carbohydrate metabolism	ko01100//Metabolic pathways;ko01200//Carbon metabolism;ko00010//Glycolysis / Gluconeogenesis;ko04066//HIF-1 signaling pathway;ko04922//Glucagon signaling pathway;ko05230//Central carbon metabolism in cancer;ko00020//Citrate cycle (TCA cycle);ko00620//Pyruvate metabolism	K00162;K00162;K00162;K00162;K00162;K00162;K00162;K00162	-	-	-
0	ncbi_113823208	ncbi_113823208	0.540621566	0.400973379	0.431112604	1.84E-84	4.92E-80	--	-	-	-	-	-	-	-	-
0	ncbi_113820497	Sdhaf3	0.927748706	0.673082331	0.462951098	8.95E-83	2.40E-78	Sdhaf3	PREDICTED: succinate dehydrogenase assembly factor 3, mitochondrial-like isoform X3 [Cephus cinctus]	-	-	-	-	-	-	-
0	ncbi_113803758	Iscu	0.789020549	0.569696097	0.469870351	2.02E-82	5.40E-78	Iscu	PREDICTED: iron-sulfur cluster assembly enzyme ISCU, mitochondrial-like [Hyalella azteca]	-	-	-	-	-	-	-
0	ncbi_113808636	ncbi_113808636	0.66973636	0.471476008	0.506408937	4.95E-82	1.32E-77	--	-	-	-	-	-	-	-	-
0	ncbi_113824316	DHRS4	1.159573308	0.893636734	0.375833634	1.39E-81	3.72E-77	DHRS4	PREDICTED: dehydrogenase/reductase SDR family member 4-like [Hyalella azteca]	Metabolism;Cellular Processes;Metabolism	Global and overview maps;Transport and catabolism;Metabolism of cofactors and vitamins	ko01100//Metabolic pathways;ko04146//Peroxisome;ko00830//Retinol metabolism	K11147;K11147;K11147	-	-	-
0	ncbi_113829901	Rpt2	0.999596644	0.730890391	0.451690992	3.14E-81	8.40E-77	Rpt2	PREDICTED: 26S protease regulatory subunit 4 [Drosophila busckii]	Human Diseases;Human Diseases;Human Diseases;Genetic Information Processing	Infectious diseases;Cancers;Infectious diseases;Folding, sorting and degradation	ko05165//Human papillomavirus infection;ko05203//Viral carcinogenesis;ko05169//Epstein-Barr virus infection;ko03050//Proteasome	K03062;K03062;K03062;K03062	GO:0044424//intracellular part	GO:0016462//pyrophosphatase activity;GO:0032550//purine ribonucleoside binding	GO:0009057//macromolecule catabolic process
0	ncbi_113828657	PINX1	0.561052477	0.402093259	0.480605568	3.58E-81	9.59E-77	PINX1	Pinx1, partial [Litopenaeus vannamei]	-	-	-	-	GO:0043232//intracellular non-membrane-bounded organelle;GO:0044446//intracellular organelle part	-	-
0	ncbi_113802357	Rac2	0.812405724	0.566857598	0.519214046	4.19E-81	1.12E-76	Rac2	PREDICTED: rho-related GTP-binding protein RhoQ isoform X1 [Pseudopodoces humilis]	Human Diseases;Cellular Processes;Human Diseases;Cellular Processes;Environmental Information Processing;Cellular Processes;Cellular Processes;Environmental Information Processing;Human Diseases;Environmental Information Processing;Cellular Processes;Human Diseases;Human Diseases;Human Diseases;Human Diseases;Environmental Information Processing;Organismal Systems;Environmental Information Proces…	Cancers;Cellular community - eukaryotes;Cancers;Transport and catabolism;Signal transduction;Cell motility;Cellular community - eukaryotes;Signal transduction;Cancers;Signal transduction;Cellular community - eukaryotes;Cardiovascular diseases;Infectious diseases;Infectious diseases;Infectious diseases;Signal transduction;Digestive system;Signal transduction;Cancers;Cardiovascular diseases;Signal …	ko05200//Pathways in cancer;ko04510//Focal adhesion;ko05205//Proteoglycans in cancer;ko04145//Phagosome;ko04151//PI3K-Akt signaling pathway;ko04810//Regulation of actin cytoskeleton;ko04530//Tight junction;ko04015//Rap1 signaling pathway;ko05231//Choline metabolism in cancer;ko04013//MAPK signaling pathway - fly;ko04520//Adherens junction;ko05418//Fluid shear stress and atherosclerosis;ko05131//S…	K04392;K04392;K04392;K04392;K04392;K04392;K04392;K04392;K04392;K04392;K04392;K04392;K04392;K04392;K04392;K04392;K04392;K04392;K04392;K04392;K04392;K04392;K04392;K04392;K04392;K04392;K04392;K04392;K04392;K04392;K04392;K04392;K04392;K04392;K04392;K04392;K04392;K04392;K04392;K04392;K04392;K04392;K04392	-	-	-
0	ncbi_113807538	ZNFX1	0.766866995	0.563372334	0.44488766	1.80E-80	4.83E-76	ZNFX1	PREDICTED: NFX1-type zinc finger-containing protein 1-like, partial [Hyalella azteca]	-	-	-	-	-	-	-
0	ncbi_113829826	ncbi_113829826	0.55313171	0.35715391	0.631077135	2.68E-80	7.18E-76	--	Coiled-coil-helix-coiled-coil-helix domain-containing protein 1 [Zootermopsis nevadensis]	-	-	-	-	-	-	-
0	ncbi_113813084	Lam	0.898229913	0.676752404	0.408456661	4.09E-80	1.10E-75	Lam	PREDICTED: lamin Dm0 isoform X2 [Cerapachys biroi]	Cellular Processes;Cellular Processes	Cell growth and death;Cell growth and death	ko04210//Apoptosis;ko04214//Apoptosis - fly	K07611;K07611	-	-	-
0	ncbi_113819728	ncbi_113819728	1.03901621	0.785158368	0.404162581	4.18E-80	1.12E-75	--	-	-	-	-	-	-	-	-
0	ncbi_113825518	NDUFS3	0.918038273	0.657541298	0.481472793	1.17E-79	3.12E-75	NDUFS3	PREDICTED: NADH dehydrogenase [ubiquinone] iron-sulfur protein 3, mitochondrial-like [Hyalella azteca]	Metabolism;Organismal Systems;Human Diseases;Human Diseases;Human Diseases;Human Diseases;Metabolism;Organismal Systems	Global and overview maps;Environmental adaptation;Neurodegenerative diseases;Neurodegenerative diseases;Endocrine and metabolic diseases;Neurodegenerative diseases;Energy metabolism;Nervous system	ko01100//Metabolic pathways;ko04714//Thermogenesis;ko05016//Huntington disease;ko05010//Alzheimer disease;ko04932//Non-alcoholic fatty liver disease (NAFLD);ko05012//Parkinson disease;ko00190//Oxidative phosphorylation;ko04723//Retrograde endocannabinoid signaling	K03936;K03936;K03936;K03936;K03936;K03936;K03936;K03936	-	GO:0016491//oxidoreductase activity	GO:0044710//single-organism metabolic process
0	ncbi_113826804	Mrpl21	0.548817958	0.37277233	0.558032913	2.43E-79	6.51E-75	Mrpl21	39S ribosomal protein L21, mitochondrial [Daphnia magna]	Genetic Information Processing	Translation	ko03010//Ribosome	K02888	-	-	-
0	ncbi_113822082	rpmA	0.598201167	0.39095417	0.61363123	3.96E-79	1.06E-74	rpmA	PREDICTED: 39S ribosomal protein L27, mitochondrial [Stomoxys calcitrans]	Genetic Information Processing	Translation	ko03010//Ribosome	K02899	GO:0005622//intracellular	-	-
0	ncbi_113823596	NDUFV2	0.754228019	0.510725418	0.562452884	6.87E-78	1.84E-73	NDUFV2	PREDICTED: probable NADH dehydrogenase [ubiquinone] flavoprotein 2, mitochondrial [Bemisia tabaci]	Metabolism;Organismal Systems;Human Diseases;Human Diseases;Human Diseases;Human Diseases;Metabolism;Organismal Systems	Global and overview maps;Environmental adaptation;Neurodegenerative diseases;Neurodegenerative diseases;Endocrine and metabolic diseases;Neurodegenerative diseases;Energy metabolism;Nervous system	ko01100//Metabolic pathways;ko04714//Thermogenesis;ko05016//Huntington disease;ko05010//Alzheimer disease;ko04932//Non-alcoholic fatty liver disease (NAFLD);ko05012//Parkinson disease;ko00190//Oxidative phosphorylation;ko04723//Retrograde endocannabinoid signaling	K03943;K03943;K03943;K03943;K03943;K03943;K03943;K03943	-	-	-
0	ncbi_113807114	HIGD2A	0.677261569	0.472766976	0.518583871	7.21E-78	1.93E-73	HIGD2A	PREDICTED: HIG1 domain family member 2A, mitochondrial [Bactrocera latifrons]	-	-	-	-	-	-	-
0	ncbi_113807060	ATRX	0.589538004	0.410025087	0.523872635	1.01E-76	2.69E-72	ATRX	PREDICTED: transcriptional regulator ATRX-like [Hyalella azteca]	-	-	-	-	-	-	-
0	ncbi_113816534	Drg2	0.928944028	0.705608813	0.396723092	9.84E-76	2.63E-71	Drg2	Developmentally-regulated GTP-binding protein 2 [Zootermopsis nevadensis]	-	-	-	-	-	GO:0032550//purine ribonucleoside binding	-
0	ncbi_113802973	MRPL54	0.624941497	0.433741048	0.526887157	1.62E-75	4.35E-71	MRPL54	39S ribosomal protein L54, mitochondrial [Daphnia magna]	-	-	-	-	-	-	-
0	ncbi_113806936	mep-1	0.957104139	0.711821971	0.427159444	4.58E-75	1.23E-70	mep-1	PREDICTED: MOG interacting and ectopic P-granules protein 1 isoform X4 [Halyomorpha halys]	-	-	-	-	-	-	-
0	ncbi_113803504	pit	0.503017932	0.356735791	0.495753867	1.19E-74	3.20E-70	pit	PREDICTED: probable ATP-dependent RNA helicase pitchoune [Polistes canadensis]	-	-	-	-	-	GO:0003676//nucleic acid binding;GO:0016787//hydrolase activity	-
0	ncbi_113809607	DCPS	0.887599326	0.669945139	0.405865612	1.21E-73	3.24E-69	DCPS	PREDICTED: m7GpppX diphosphatase [Halyomorpha halys]	Genetic Information Processing	Folding, sorting and degradation	ko03018//RNA degradation	K12584	GO:0043231//intracellular membrane-bounded organelle	GO:0016787//hydrolase activity	GO:0009987//cellular process
0	ncbi_113824981	fam167a	0.848373857	0.649246349	0.385934169	1.53E-73	4.09E-69	fam167a	PREDICTED: protein FAM167A-like [Branchiostoma belcheri]	-	-	-	-	-	-	-
0	ncbi_113812990	Mrpl3	0.60770005	0.414589802	0.551674782	1.97E-73	5.28E-69	Mrpl3	PREDICTED: 39S ribosomal protein L3, mitochondrial [Cephus cinctus]	Genetic Information Processing	Translation	ko03010//Ribosome	K02906	-	-	-
0	ncbi_113804709	Utp14a	0.838793106	0.627270868	0.419226442	2.38E-72	6.38E-68	Utp14a	GH14745 [Drosophila grimshawi]	Genetic Information Processing	Translation	ko03008//Ribosome biogenesis in eukaryotes	K14567	-	-	-
0	ncbi_113808971	eef1akmt1	0.605607719	0.410891794	0.559625075	2.53E-72	6.77E-68	eef1akmt1	Lysine N-methyltransferase N6AMT2 [Daphnia magna]	-	-	-	-	-	GO:0016740//transferase activity	-
0	ncbi_113815934	ruvbl1	0.536078857	0.364238389	0.557562254	3.29E-71	8.81E-67	ruvbl1	PREDICTED: ruvB-like helicase 1 [Hyalella azteca]	Environmental Information Processing	Signal transduction	ko04310//Wnt signaling pathway	K04499	GO:0044454//nuclear chromosome part;GO:0044665//MLL1/2 complex	GO:0004003//ATP-dependent DNA helicase activity;GO:0032550//purine ribonucleoside binding	GO:0006259//DNA metabolic process;GO:0010468//regulation of gene expression;GO:0032392//DNA geometric change;GO:0033554//cellular response to stress;GO:0034645//cellular macromolecule biosynthetic process
0	ncbi_113803906	DARS	0.50387968	0.332802122	0.598414644	9.73E-71	2.61E-66	DARS	PREDICTED: aspartate--tRNA ligase, cytoplasmic [Camponotus floridanus]	Genetic Information Processing	Translation	ko00970//Aminoacyl-tRNA biosynthesis	K22503	-	-	-
0	ncbi_113817415	cars	0.687866934	0.503758336	0.449397701	1.39E-70	3.73E-66	cars	PREDICTED: cysteine--tRNA ligase, cytoplasmic [Dufourea novaeangliae]	Genetic Information Processing	Translation	ko00970//Aminoacyl-tRNA biosynthesis	K01883	-	-	-
0	ncbi_113819817	ncbi_113819817	0.755195156	0.517422459	0.545506833	2.61E-70	6.98E-66	--	-	-	-	-	-	-	-	-
0	ncbi_113803489	VhaSFD	0.767501002	0.550622676	0.479104609	5.32E-70	1.42E-65	VhaSFD	vacuolar-H-ATPase H [Cherax quadricarinatus]	Metabolism;Human Diseases;Cellular Processes;Cellular Processes;Environmental Information Processing;Human Diseases;Metabolism;Human Diseases;Human Diseases;Organismal Systems;Human Diseases	Global and overview maps;Infectious diseases;Transport and catabolism;Transport and catabolism;Signal transduction;Infectious diseases;Energy metabolism;Infectious diseases;Infectious diseases;Nervous system;Immune diseases	ko01100//Metabolic pathways;ko05165//Human papillomavirus infection;ko04145//Phagosome;ko04142//Lysosome;ko04150//mTOR signaling pathway;ko05110//Vibrio cholerae infection;ko00190//Oxidative phosphorylation;ko05152//Tuberculosis;ko05120//Epithelial cell signaling in Helicobacter pylori infection;ko04721//Synaptic vesicle cycle;ko05323//Rheumatoid arthritis	K02144;K02144;K02144;K02144;K02144;K02144;K02144;K02144;K02144;K02144;K02144	-	GO:0015078//hydrogen ion transmembrane transporter activity	GO:0015988//energy coupled proton transmembrane transport, against electrochemical gradient
0	ncbi_113822063	ncbi_113822063	0.819589804	0.628163368	0.383762225	7.83E-70	2.10E-65	--	PREDICTED: uncharacterized protein LOC108675159 [Hyalella azteca]	-	-	-	-	-	-	-
0	ncbi_113823576	ced-3	0.734450699	0.55298047	0.409437121	9.92E-70	2.66E-65	ced-3	PREDICTED: cell death protein 3-like [Limulus polyphemus]	Cellular Processes;Cellular Processes	Cell growth and death;Cell growth and death	ko04214//Apoptosis - fly;ko04215//Apoptosis - multiple species	K20009;K20009	-	-	-
0	ncbi_113825175	PSMC6	0.674196282	0.468520775	0.525055651	1.24E-69	3.31E-65	PSMC6	PREDICTED: 26S protease regulatory subunit 10B [Hyalella azteca]	Human Diseases;Genetic Information Processing	Infectious diseases;Folding, sorting and degradation	ko05169//Epstein-Barr virus infection;ko03050//Proteasome	K03064;K03064	-	-	-
0	ncbi_113802885	psmc2	0.856308457	0.625249695	0.453698126	2.09E-69	5.60E-65	psmc2	PREDICTED: 26S protease regulatory subunit 7 [Hyalella azteca]	Human Diseases;Genetic Information Processing	Infectious diseases;Folding, sorting and degradation	ko05169//Epstein-Barr virus infection;ko03050//Proteasome	K03061;K03061	GO:0044424//intracellular part	GO:0016787//hydrolase activity;GO:0032550//purine ribonucleoside binding	GO:0009057//macromolecule catabolic process;GO:0019538//protein metabolic process
0	ncbi_113821293	ND-42	0.846986297	0.626044753	0.436072837	1.91E-68	5.11E-64	ND-42	PREDICTED: NADH dehydrogenase [ubiquinone] 1 alpha subcomplex subunit 10, mitochondrial-like [Limulus polyphemus]	Metabolism;Organismal Systems;Human Diseases;Human Diseases;Human Diseases;Human Diseases;Metabolism;Organismal Systems	Global and overview maps;Environmental adaptation;Neurodegenerative diseases;Neurodegenerative diseases;Endocrine and metabolic diseases;Neurodegenerative diseases;Energy metabolism;Nervous system	ko01100//Metabolic pathways;ko04714//Thermogenesis;ko05016//Huntington disease;ko05010//Alzheimer disease;ko04932//Non-alcoholic fatty liver disease (NAFLD);ko05012//Parkinson disease;ko00190//Oxidative phosphorylation;ko04723//Retrograde endocannabinoid signaling	K03954;K03954;K03954;K03954;K03954;K03954;K03954;K03954	-	GO:0016740//transferase activity	GO:0006139//nucleobase-containing compound metabolic process
0	ncbi_113802390	uck2a	0.80932439	0.62072811	0.382756592	1.12E-67	3.00E-63	uck2a	PREDICTED: uridine-cytidine kinase 2-like [Hyalella azteca]	Metabolism;Metabolism;Metabolism	Global and overview maps;Xenobiotics biodegradation and metabolism;Nucleotide metabolism	ko01100//Metabolic pathways;ko00983//Drug metabolism - other enzymes;ko00240//Pyrimidine metabolism	K00876;K00876;K00876	-	GO:0016772//transferase activity, transferring phosphorus-containing groups;GO:0032550//purine ribonucleoside binding	GO:0006796//phosphate-containing compound metabolic process
0	ncbi_113800706	ncbi_113800706	0.535631813	0.351317895	0.608464585	1.97E-67	5.27E-63	--	-	-	-	-	-	-	-	-
0	ncbi_113807004	Snrpd2	0.957770331	0.738953574	0.374196018	2.47E-67	6.62E-63	Snrpd2	PREDICTED: probable small nuclear ribonucleoprotein Sm D2 [Hyalella azteca]	Genetic Information Processing	Transcription	ko03040//Spliceosome	K11096	GO:0030529//intracellular ribonucleoprotein complex	-	-
0	ncbi_113820495	Tim9a	0.567296482	0.401170351	0.499887934	4.16E-67	1.11E-62	Tim9a	PREDICTED: mitochondrial import inner membrane translocase subunit Tim9 [Tribolium castaneum]	-	-	-	-	-	-	GO:0051234//establishment of localization
0	ncbi_113829111	PSMD12	0.702874418	0.513300639	0.453462889	5.20E-67	1.39E-62	PSMD12	26S proteamsome non-ATPase subunit 12 [Eriocheir sinensis]	Human Diseases;Genetic Information Processing	Infectious diseases;Folding, sorting and degradation	ko05169//Epstein-Barr virus infection;ko03050//Proteasome	K03035;K03035	GO:0022624//proteasome accessory complex;GO:0031988//membrane-bounded vesicle	-	-
0	ncbi_113811602	eif3l	0.799879739	0.603467378	0.406507325	2.38E-66	6.38E-62	eif3l	PREDICTED: eukaryotic translation initiation factor 3 subunit L-like [Hyalella azteca]	-	-	-	-	GO:0070993//translation preinitiation complex	-	GO:0006412//translation
0	ncbi_113806193	MRPS5	0.461214908	0.311350827	0.566898033	3.15E-66	8.44E-62	MRPS5	28S ribosomal protein S5, mitochondrial [Zootermopsis nevadensis]	Genetic Information Processing	Translation	ko03010//Ribosome	K02988	GO:0030529//intracellular ribonucleoprotein complex	-	-
0	ncbi_113814910	mRpL51	0.561037414	0.391029875	0.520818149	4.39E-66	1.18E-61	mRpL51	AGAP003770-PA [Anopheles gambiae str. PEST] [Anopheles gambiae]	-	-	-	-	-	-	-
0	ncbi_113823589	eIF3-S10	0.510831046	0.368001001	0.473136517	1.63E-65	4.36E-61	eIF3-S10	PREDICTED: eukaryotic translation initiation factor 3 subunit A-like [Hyalella azteca]	Genetic Information Processing	Translation	ko03013//RNA transport	K03254	-	GO:0016620//oxidoreductase activity, acting on the aldehyde or oxo group of donors, NAD or NADP as acceptor	-
0	ncbi_113826980	ncbi_113826980	0.721052947	0.527009014	0.452277564	7.64E-65	2.05E-60	--	-	-	-	-	-	-	-	-
0	ncbi_113812044	eif3e	0.92883242	0.714206905	0.379076247	2.37E-64	6.36E-60	eif3e	PREDICTED: eukaryotic translation initiation factor 3 subunit E-B-like isoform X2 [Hyalella azteca]	Genetic Information Processing;Human Diseases	Translation;Infectious diseases	ko03013//RNA transport;ko05160//Hepatitis C	K03250;K03250	GO:0016604//nuclear body;GO:0031988//membrane-bounded vesicle;GO:0043234//protein complex;GO:0070993//translation preinitiation complex	GO:0005515//protein binding;GO:0008135//translation factor activity, RNA binding	GO:0006417//regulation of translation;GO:0022618//ribonucleoprotein complex assembly
0	ncbi_113828897	Imp3	0.514863448	0.357250943	0.527252032	5.52E-64	1.48E-59	Imp3	U3 small nucleolar ribonucleoprotein IMP3 [Zootermopsis nevadensis]	Genetic Information Processing	Translation	ko03008//Ribosome biogenesis in eukaryotes	K14560	-	-	-
0	ncbi_113809613	RtcB	0.498175003	0.33464209	0.574033717	1.91E-63	5.11E-59	RtcB	PREDICTED: tRNA-splicing ligase RtcB homolog isoform X1 [Bemisia tabaci]	-	-	-	-	GO:0043234//protein complex	GO:0008452//RNA ligase activity;GO:0032550//purine ribonucleoside binding;GO:0043169//cation binding	GO:0000394//RNA splicing, via endonucleolytic cleavage and ligation;GO:0006399//tRNA metabolic process
0	ncbi_113821411	GLRX2	0.917318989	0.688822964	0.413290265	2.75E-63	7.38E-59	GLRX2	PREDICTED: glutaredoxin 2 [Latimeria chalumnae]	-	-	-	-	-	GO:0016491//oxidoreductase activity	GO:0044699//single-organism process
0	ncbi_113817072	MVK	0.79949902	0.601680391	0.410098924	8.65E-63	2.32E-58	MVK	PREDICTED: mevalonate kinase-like [Hyalella azteca]	Metabolism;Cellular Processes;Metabolism	Global and overview maps;Transport and catabolism;Metabolism of terpenoids and polyketides	ko01100//Metabolic pathways;ko04146//Peroxisome;ko00900//Terpenoid backbone biosynthesis	K00869;K00869;K00869	-	-	-
0	ncbi_113828994	ncbi_113828994	0.573711549	0.399286781	0.522900249	9.30E-63	2.49E-58	--	PREDICTED: ribosomal protein 63, mitochondrial-like [Agrilus planipennis]	-	-	-	-	-	-	-
0	ncbi_113806834	rpl-7	1.137500194	0.838683888	0.439667746	6.37E-62	1.71E-57	rpl-7	ribosomal protein L7 [Litopenaeus vannamei]	Genetic Information Processing	Translation	ko03010//Ribosome	K02937	-	-	-
0	ncbi_113817185	CNDP2	0.743749265	0.551039071	0.432661724	1.23E-60	3.30E-56	CNDP2	PREDICTED: cytosolic non-specific dipeptidase-like isoform X2 [Hyalella azteca]	Metabolism;Metabolism;Metabolism;Metabolism	Global and overview maps;Amino acid metabolism;Metabolism of other amino acids;Amino acid metabolism	ko01100//Metabolic pathways;ko00330//Arginine and proline metabolism;ko00410//beta-Alanine metabolism;ko00340//Histidine metabolism	K08660;K08660;K08660;K08660	GO:0031988//membrane-bounded vesicle	GO:0008238//exopeptidase activity	-
0	ncbi_113813553	Sdcbp	0.813054271	0.634342721	0.358089148	3.45E-60	9.24E-56	Sdcbp	syntenin [Penaeus monodon]	-	-	-	-	-	-	-
0	ncbi_113803971	ncbi_113803971	0.496457122	0.318031968	0.642497331	5.85E-60	1.57E-55	--	PREDICTED: uncharacterized lyase C29B12.13-like [Hyalella azteca]	-	-	-	-	-	-	-
0	ncbi_113804462	Jmjd7	0.581732046	0.405142519	0.52192528	6.71E-60	1.80E-55	Jmjd7	PREDICTED: jmjC domain-containing protein 7 [Saccoglossus kowalevskii]	-	-	-	-	-	-	-
0	ncbi_113810074	RPS14	0.770873671	0.568045691	0.440487476	1.39E-59	3.73E-55	RPS14	ribosome like protein [Marsupenaeus japonicus]	Genetic Information Processing	Translation	ko03010//Ribosome	K02955	GO:0030529//intracellular ribonucleoprotein complex	-	GO:0010467//gene expression
0	ncbi_113809213	Vha36-1	0.487246397	0.308978347	0.657145776	2.39E-59	6.40E-55	Vha36-1	PREDICTED: V-type proton ATPase subunit D-like [Hyalella azteca]	Metabolism;Human Diseases;Cellular Processes;Environmental Information Processing;Human Diseases;Metabolism;Human Diseases;Organismal Systems;Human Diseases;Organismal Systems	Global and overview maps;Infectious diseases;Transport and catabolism;Signal transduction;Infectious diseases;Energy metabolism;Infectious diseases;Nervous system;Immune diseases;Excretory system	ko01100//Metabolic pathways;ko05165//Human papillomavirus infection;ko04145//Phagosome;ko04150//mTOR signaling pathway;ko05110//Vibrio cholerae infection;ko00190//Oxidative phosphorylation;ko05120//Epithelial cell signaling in Helicobacter pylori infection;ko04721//Synaptic vesicle cycle;ko05323//Rheumatoid arthritis;ko04966//Collecting duct acid secretion	K02149;K02149;K02149;K02149;K02149;K02149;K02149;K02149;K02149;K02149	-	-	-
0	ncbi_113803241	glrx3	0.756715025	0.568816396	0.411787039	6.89E-59	1.84E-54	glrx3	PREDICTED: glutaredoxin-3-like [Hyalella azteca]	-	-	-	-	GO:0031674//I band;GO:0031988//membrane-bounded vesicle	GO:0003723//RNA binding;GO:0015036//disulfide oxidoreductase activity	GO:0010611//regulation of cardiac muscle hypertrophy;GO:0019725//cellular homeostasis;GO:0044710//single-organism metabolic process
0	ncbi_113826605	Suclg2	0.83982383	0.648349323	0.373315394	8.44E-59	2.26E-54	Suclg2	PREDICTED: succinyl-CoA ligase [GDP-forming] subunit beta, mitochondrial-like, partial [Hyalella azteca]	Metabolism;Metabolism;Metabolism;Metabolism	Global and overview maps;Global and overview maps;Carbohydrate metabolism;Carbohydrate metabolism	ko01100//Metabolic pathways;ko01200//Carbon metabolism;ko00020//Citrate cycle (TCA cycle);ko00640//Propanoate metabolism	K01900;K01900;K01900;K01900	-	GO:0003824//catalytic activity;GO:0032550//purine ribonucleoside binding	-
0	ncbi_113812537	ccdc25	0.815747856	0.600852549	0.441112299	1.74E-58	4.66E-54	ccdc25	PREDICTED: coiled-coil domain-containing protein 25-like [Hyalella azteca]	-	-	-	-	-	-	-
0	ncbi_113804185	mRpL23	0.750663206	0.575324398	0.383790118	3.03E-58	8.11E-54	mRpL23	AAEL005150-PA [Aedes aegypti]	Genetic Information Processing	Translation	ko03010//Ribosome	K02892	GO:0000315//organellar large ribosomal subunit	GO:0005198//structural molecule activity	-
0	ncbi_113825117	VPS37B	0.63725349	0.46894942	0.442435046	8.54E-58	2.29E-53	VPS37B	PREDICTED: vacuolar protein sorting-associated protein 37B-like [Hyalella azteca]	Cellular Processes	Transport and catabolism	ko04144//Endocytosis	K12185	-	-	-
0	ncbi_113826008	ncbi_113826008	1.500125789	1.127797652	0.411575235	8.67E-58	2.32E-53	--	-	-	-	-	-	-	-	-
0	ncbi_113826494	RPL6	9.081885979	6.044758298	0.58730727	6.12E-57	1.64E-52	RPL6	PREDICTED: 60S ribosomal protein L6-like [Limulus polyphemus]	Genetic Information Processing	Translation	ko03010//Ribosome	K02934	-	-	-
0	ncbi_113815192	ncbi_113815192	0.814489575	0.628584021	0.373790634	6.23E-57	1.67E-52	--	-	-	-	-	-	-	-	-
0	ncbi_113805306	Sucla2	0.776960007	0.598808001	0.375746841	6.33E-57	1.69E-52	Sucla2	PREDICTED: succinyl-CoA ligase [ADP-forming] subunit beta, mitochondrial-like [Hyalella azteca]	Metabolism;Metabolism;Metabolism;Metabolism	Global and overview maps;Global and overview maps;Carbohydrate metabolism;Carbohydrate metabolism	ko01100//Metabolic pathways;ko01200//Carbon metabolism;ko00020//Citrate cycle (TCA cycle);ko00640//Propanoate metabolism	K01900;K01900;K01900;K01900	-	-	-
0	ncbi_113811550	ncbi_113811550	1.138530509	0.765777663	0.572175468	2.19E-56	5.88E-52	--	PREDICTED: uncharacterized protein LOC108677823 isoform X2 [Hyalella azteca]	-	-	-	-	-	-	-
0	ncbi_113800343	ncbi_113800343	0.507572115	0.341052643	0.573618371	3.36E-56	8.99E-52	--	-	-	-	-	-	-	-	-
0	ncbi_113819352	SHMT1	0.663836693	0.495226664	0.42273938	1.92E-55	5.15E-51	SHMT1	PREDICTED: serine hydroxymethyltransferase, cytosolic-like [Hyalella azteca]	Metabolism;Metabolism;Metabolism;Metabolism;Metabolism;Human Diseases;Metabolism	Global and overview maps;Global and overview maps;Global and overview maps;Amino acid metabolism;Carbohydrate metabolism;Drug resistance;Metabolism of cofactors and vitamins	ko01100//Metabolic pathways;ko01200//Carbon metabolism;ko01230//Biosynthesis of amino acids;ko00260//Glycine, serine and threonine metabolism;ko00630//Glyoxylate and dicarboxylate metabolism;ko01523//Antifolate resistance;ko00670//One carbon pool by folate	K00600;K00600;K00600;K00600;K00600;K00600;K00600	-	GO:0016742//hydroxymethyl-, formyl- and related transferase activity;GO:0043168//anion binding	GO:0006730//one-carbon metabolic process;GO:0009069//serine family amino acid metabolic process
0	ncbi_113803764	MRPS21	0.478090896	0.321971723	0.570350943	7.34E-55	1.96E-50	MRPS21	PREDICTED: 28S ribosomal protein S21, mitochondrial [Athalia rosae]	Genetic Information Processing	Translation	ko03010//Ribosome	K02970	GO:0000314//organellar small ribosomal subunit	-	GO:0010467//gene expression
0	ncbi_113800194	RpII15	0.742097634	0.576725014	0.363725411	1.19E-54	3.20E-50	RpII15	PREDICTED: DNA-directed RNA polymerase II subunit RPB9-like [Hyalella azteca]	Metabolism;Human Diseases;Metabolism;Human Diseases;Metabolism;Genetic Information Processing	Global and overview maps;Neurodegenerative diseases;Nucleotide metabolism;Infectious diseases;Nucleotide metabolism;Transcription	ko01100//Metabolic pathways;ko05016//Huntington disease;ko00230//Purine metabolism;ko05169//Epstein-Barr virus infection;ko00240//Pyrimidine metabolism;ko03020//RNA polymerase	K03017;K03017;K03017;K03017;K03017;K03017	GO:0044451//nucleoplasm part	GO:0003676//nucleic acid binding;GO:0034062//RNA polymerase activity;GO:0046914//transition metal ion binding	GO:0000280//nuclear division;GO:0006351//transcription, DNA-templated;GO:0030154//cell differentiation;GO:0031572//G2 DNA damage checkpoint
0	ncbi_113807012	gpn2	0.500985557	0.35650813	0.490834037	5.36E-54	1.44E-49	gpn2	PREDICTED: GPN-loop GTPase 2-like [Hyalella azteca]	-	-	-	-	-	-	-
0	ncbi_113802626	Nlrp10	0.496004242	0.348874911	0.507642607	7.38E-54	1.98E-49	Nlrp10	PREDICTED: NLR family CARD domain-containing protein 4-like [Lingula anatina]	Organismal Systems	Immune system	ko04621//NOD-like receptor signaling pathway	K20865	-	-	-
0	ncbi_113812036	Rnmt	0.540296925	0.39768953	0.442109891	9.04E-54	2.42E-49	Rnmt	PREDICTED: mRNA cap guanine-N7 methyltransferase-like [Hyalella azteca]	Genetic Information Processing	Translation	ko03015//mRNA surveillance pathway	K00565	-	-	-
0	ncbi_113812500	MRPS28	0.715394649	0.549747117	0.379971195	1.14E-53	3.06E-49	MRPS28	AAEL003730-PA [Aedes aegypti]	-	-	-	-	-	-	-
0	ncbi_113818246	ncbi_113818246	0.506169073	0.362126622	0.48312512	8.98E-52	2.41E-47	--	PREDICTED: uncharacterized protein LOC105210142 [Bactrocera cucurbitae]	-	-	-	-	-	-	-
0	ncbi_113825875	Mpc1	0.486022295	0.353125416	0.460841832	9.20E-50	2.46E-45	Mpc1	PREDICTED: mitochondrial pyruvate carrier 1-like [Hyalella azteca]	-	-	-	-	GO:0019866//organelle inner membrane;GO:0031224//intrinsic component of membrane;GO:0043231//intracellular membrane-bounded organelle	GO:0008028//monocarboxylic acid transmembrane transporter activity	GO:0006839//mitochondrial transport;GO:0032787//monocarboxylic acid metabolic process
0	ncbi_113812988	GOT2	0.558646644	0.415529272	0.426985926	3.19E-49	8.53E-45	GOT2	aspartate aminotransferase [Fenneropenaeus chinensis]	Metabolism;Metabolism;Metabolism;Metabolism;Metabolism;Metabolism;Organismal Systems;Metabolism;Metabolism;Metabolism;Metabolism;Metabolism	Global and overview maps;Global and overview maps;Global and overview maps;Amino acid metabolism;Amino acid metabolism;Amino acid metabolism;Digestive system;Global and overview maps;Amino acid metabolism;Amino acid metabolism;Amino acid metabolism;Amino acid metabolism	ko01100//Metabolic pathways;ko01200//Carbon metabolism;ko01230//Biosynthesis of amino acids;ko00330//Arginine and proline metabolism;ko00270//Cysteine and methionine metabolism;ko00250//Alanine, aspartate and glutamate metabolism;ko04975//Fat digestion and absorption;ko01210//2-Oxocarboxylic acid metabolism;ko00350//Tyrosine metabolism;ko00220//Arginine biosynthesis;ko00360//Phenylalanine metabol…	K14455;K14455;K14455;K14455;K14455;K14455;K14455;K14455;K14455;K14455;K14455;K14455	-	-	-
0	ncbi_113807885	ncbi_113807885	0.550620052	0.402072397	0.453601853	3.30E-49	8.84E-45	--	Glomulin [Zootermopsis nevadensis]	-	-	-	-	-	-	-
0	ncbi_113825790	dauE	0.752560947	0.582477156	0.369606954	6.54E-49	1.75E-44	dauE	3-oxoacyl-[acyl-carrier-protein] reductase [Zootermopsis nevadensis]	-	-	-	-	-	GO:0003824//catalytic activity	GO:0044710//single-organism metabolic process
0	ncbi_113817269	SF3A3	0.589893696	0.443606842	0.411173373	6.77E-49	1.81E-44	SF3A3	PREDICTED: splicing factor 3A subunit 3 [Dendroctonus ponderosae]	Genetic Information Processing	Transcription	ko03040//Spliceosome	K12827	GO:0043231//intracellular membrane-bounded organelle	GO:0046914//transition metal ion binding	-
0	ncbi_113816941	Liph	0.510336802	0.366716105	0.476786058	2.23E-48	5.98E-44	Liph	PREDICTED: phospholipase A1 member A-like isoform X2 [Hyalella azteca]	Metabolism;Organismal Systems;Metabolism;Organismal Systems;Organismal Systems	Global and overview maps;Digestive system;Lipid metabolism;Digestive system;Digestive system	ko01100//Metabolic pathways;ko04972//Pancreatic secretion;ko00561//Glycerolipid metabolism;ko04977//Vitamin digestion and absorption;ko04975//Fat digestion and absorption	K14073;K14073;K14073;K14073;K14073	-	-	-
0	ncbi_113802078	REXO1L1	0.776765349	0.603529753	0.364053949	2.24E-48	5.99E-44	REXO1L1	PREDICTED: RNA exonuclease 3 isoform X2 [Vollenhovia emeryi]	Genetic Information Processing	Translation	ko03008//Ribosome biogenesis in eukaryotes	K14570	-	-	-
0	ncbi_113814810	Dpp3	0.552579859	0.412434003	0.422019697	4.41E-48	1.18E-43	Dpp3	PREDICTED: dipeptidyl peptidase 3-like isoform X1 [Hyalella azteca]	-	-	-	-	-	-	-
0	ncbi_113823845	hddc3	0.468384298	0.334422849	0.486019292	8.93E-48	2.39E-43	hddc3	PREDICTED: guanosine-3',5'-bis(diphosphate) 3'-pyrophosphohydrolase MESH1-like [Branchiostoma belcheri]	Metabolism	Nucleotide metabolism	ko00230//Purine metabolism	K21138	-	GO:0016787//hydrolase activity	-
0	ncbi_113821673	Ide	0.731433127	0.539915499	0.437992336	9.87E-48	2.64E-43	Ide	PREDICTED: insulin-degrading enzyme-like [Priapulus caudatus]	Human Diseases	Neurodegenerative diseases	ko05010//Alzheimer disease	K01408	-	GO:0003824//catalytic activity	-
0	ncbi_113803330	TRAPPC4	0.572318966	0.412673082	0.471820081	1.78E-47	4.76E-43	TRAPPC4	PREDICTED: trafficking protein particle complex subunit 4-like [Hyalella azteca]	-	-	-	-	-	-	-
0	ncbi_113814912	ATP6V0E2	0.694160884	0.524025079	0.405634215	1.96E-47	5.24E-43	ATP6V0E2	PREDICTED: V-type proton ATPase subunit e-like [Hyalella azteca]	Metabolism;Human Diseases;Cellular Processes;Human Diseases;Metabolism;Human Diseases;Organismal Systems;Human Diseases;Organismal Systems	Global and overview maps;Infectious diseases;Transport and catabolism;Infectious diseases;Energy metabolism;Infectious diseases;Nervous system;Immune diseases;Excretory system	ko01100//Metabolic pathways;ko05165//Human papillomavirus infection;ko04145//Phagosome;ko05110//Vibrio cholerae infection;ko00190//Oxidative phosphorylation;ko05120//Epithelial cell signaling in Helicobacter pylori infection;ko04721//Synaptic vesicle cycle;ko05323//Rheumatoid arthritis;ko04966//Collecting duct acid secretion	K02153;K02153;K02153;K02153;K02153;K02153;K02153;K02153;K02153	-	-	-
0	ncbi_113802272	ncbi_113802272	0.566298212	0.387331245	0.547994089	7.17E-47	1.92E-42	--	heat shock protein [Cherax destructor]	-	-	-	-	-	-	-
0	ncbi_113817250	RWDD4	0.498391833	0.360995931	0.465297855	9.38E-47	2.51E-42	RWDD4	PREDICTED: RWD domain-containing protein 4 [Drosophila arizonae]	-	-	-	-	-	-	-
0	ncbi_113810944	COQ7	0.494014824	0.349152659	0.500696372	3.14E-46	8.41E-42	COQ7	PREDICTED: 5-demethoxyubiquinone hydroxylase, mitochondrial-like [Hyalella azteca]	Metabolism;Metabolism	Global and overview maps;Metabolism of cofactors and vitamins	ko01100//Metabolic pathways;ko00130//Ubiquinone and other terpenoid-quinone biosynthesis	K06134;K06134	-	-	GO:0044710//single-organism metabolic process
0	ncbi_113810216	beta-PheRS	0.506986534	0.371009211	0.450492423	3.42E-46	9.15E-42	beta-PheRS	PREDICTED: phenylalanine--tRNA ligase beta subunit-like [Hyalella azteca]	Genetic Information Processing	Translation	ko00970//Aminoacyl-tRNA biosynthesis	K01890	-	GO:0005488//binding	-
0	ncbi_113803835	TRIADDRAFT_35934	0.833369824	0.640784434	0.379117759	3.01E-45	8.07E-41	TRIADDRAFT_35934	PREDICTED: ubiquitin-fold modifier-conjugating enzyme 1 [Cephus cinctus]	-	-	-	-	-	-	-
0	ncbi_113807387	Sirt2	0.632857935	0.488540639	0.373403101	1.04E-44	2.78E-40	Sirt2	NAD-dependent deacetylase sirtuin-2 [Zootermopsis nevadensis]	-	-	-	-	-	GO:0000166//nucleotide binding;GO:0043167//ion binding	-
0	ncbi_113802285	tmem69	0.540824917	0.397870391	0.442863084	5.10E-42	1.37E-37	tmem69	PREDICTED: transmembrane protein 69-like [Limulus polyphemus]	-	-	-	-	-	-	-
0	ncbi_113812470	SdhB	0.604362358	0.455355823	0.408419474	6.36E-42	1.70E-37	SdhB	PREDICTED: succinate dehydrogenase [ubiquinone] iron-sulfur subunit, mitochondrial-like [Hyalella azteca]	Metabolism;Organismal Systems;Human Diseases;Metabolism;Human Diseases;Human Diseases;Human Diseases;Metabolism;Metabolism	Global and overview maps;Environmental adaptation;Neurodegenerative diseases;Global and overview maps;Neurodegenerative diseases;Endocrine and metabolic diseases;Neurodegenerative diseases;Energy metabolism;Carbohydrate metabolism	ko01100//Metabolic pathways;ko04714//Thermogenesis;ko05016//Huntington disease;ko01200//Carbon metabolism;ko05010//Alzheimer disease;ko04932//Non-alcoholic fatty liver disease (NAFLD);ko05012//Parkinson disease;ko00190//Oxidative phosphorylation;ko00020//Citrate cycle (TCA cycle)	K00235;K00235;K00235;K00235;K00235;K00235;K00235;K00235;K00235	-	-	-
0	ncbi_113807113	ncbi_113807113	0.530408062	0.397482649	0.416210819	3.73E-41	9.98E-37	--	GM20712 [Drosophila sechellia]	-	-	-	-	-	-	-
0	ncbi_113800156	ncbi_113800156	0.471618464	0.345689741	0.448142415	4.82E-41	1.29E-36	--	PREDICTED: 39S ribosomal protein L42, mitochondrial-like [Hyalella azteca]	-	-	-	-	-	-	-
0	ncbi_113805092	ncbi_113805092	0.62257083	0.485576512	0.358539346	6.41E-41	1.72E-36	--	galectin [Litopenaeus vannamei]	-	-	-	-	-	-	-
0	ncbi_113801883	ncbi_113801883	0.626044631	0.462894779	0.435581222	4.97E-40	1.33E-35	--	-	-	-	-	-	-	-	-
0	ncbi_113821413	PSMD2	0.63921743	0.490703089	0.381456394	4.47E-39	1.20E-34	PSMD2	PREDICTED: 26S proteasome non-ATPase regulatory subunit 2-like [Hyalella azteca]	Human Diseases;Genetic Information Processing	Infectious diseases;Folding, sorting and degradation	ko05169//Epstein-Barr virus infection;ko03050//Proteasome	K03028;K03028	-	-	-
0	ncbi_113817161	apmap	0.502958614	0.38794664	0.374581463	1.64E-38	4.39E-34	apmap	PREDICTED: adipocyte plasma membrane-associated protein-like [Hyalella azteca]	-	-	-	-	-	-	-
0	ncbi_113822783	ncbi_113822783	0.828654498	0.644066209	0.363561704	3.50E-37	9.39E-33	--	-	-	-	-	-	-	-	-
0	ncbi_113810916	ncbi_113810916	0.63810853	0.482351134	0.40371806	6.04E-37	1.62E-32	--	PREDICTED: delta(7)-sterol 5(6)-desaturase erg32-like isoform X1 [Hyalella azteca]	-	-	-	-	-	-	-
0	ncbi_113810210	Cops4	0.504703202	0.388544209	0.377356483	8.63E-37	2.31E-32	Cops4	PREDICTED: COP9 signalosome complex subunit 4-like [Hyalella azteca]	-	-	-	-	-	-	-
0	ncbi_113817899	metap1	0.477912232	0.35520594	0.428089987	7.90E-36	2.12E-31	metap1	PREDICTED: methionine aminopeptidase 1-like [Hyalella azteca]	-	-	-	-	-	-	-
0	ncbi_113816060	SCO1	0.488572683	0.37866628	0.367646248	1.33E-35	3.56E-31	SCO1	SCO1, mitochondrial [Daphnia magna]	Human Diseases	Cancers	ko05230//Central carbon metabolism in cancer	K07152	GO:0019866//organelle inner membrane;GO:0043231//intracellular membrane-bounded organelle	GO:0005507//copper ion binding;GO:0009055//electron carrier activity	GO:0000041//transition metal ion transport;GO:0002164//larval development;GO:0007281//germ cell development;GO:0017004//cytochrome complex assembly;GO:0040011//locomotion;GO:0046916//cellular transition metal ion homeostasis
0	ncbi_113820333	ARF6	0.549872026	0.426367951	0.366996895	5.02E-35	1.34E-30	ARF6	PREDICTED: ADP-ribosylation factor 6 [Harpegnathos saltator]	Cellular Processes;Environmental Information Processing;Environmental Information Processing;Organismal Systems	Transport and catabolism;Signal transduction;Signal transduction;Immune system	ko04144//Endocytosis;ko04014//Ras signaling pathway;ko04072//Phospholipase D signaling pathway;ko04666//Fc gamma R-mediated phagocytosis	K07941;K07941;K07941;K07941	GO:0005924//cell-substrate adherens junction;GO:0010008//endosome membrane;GO:0016023//cytoplasmic, membrane-bounded vesicle;GO:0031252//cell leading edge;GO:0031253//cell projection membrane	GO:0019899//enzyme binding;GO:0032550//purine ribonucleoside binding	GO:0006810//transport;GO:0030010//establishment of cell polarity;GO:0030833//regulation of actin filament polymerization;GO:0033365//protein localization to organelle;GO:0046578//regulation of Ras protein signal transduction;GO:0050773//regulation of dendrite development;GO:0051130//positive regulation of cellular component organization;GO:0060491//regulation of cell projection assembly;GO:190401…
0	ncbi_113807140	RpL8	12.86588952	9.565150741	0.427691596	8.21E-35	2.20E-30	RpL8	ribosomal protein L8 [Litopenaeus vannamei]	Genetic Information Processing	Translation	ko03010//Ribosome	K02938	-	-	-
0	ncbi_113819680	BRAFLDRAFT_58504	0.503413045	0.380627846	0.403361493	8.32E-35	2.23E-30	BRAFLDRAFT_58504	PREDICTED: anamorsin homolog [Hyalella azteca]	-	-	-	-	GO:0043231//intracellular membrane-bounded organelle	-	-
0	ncbi_113809658	MTX2	0.574781733	0.443001831	0.37570155	3.90E-33	1.04E-28	MTX2	Metaxin-2 [Zootermopsis nevadensis]	-	-	-	-	-	-	-
0	ncbi_113809431	SGTA	0.476012908	0.370821082	0.360277431	7.27E-33	1.95E-28	SGTA	secreted protein [Ixodes scapularis]	-	-	-	-	-	-	-
0	ncbi_113800507	DHDDS	0.533637596	0.411822017	0.37383935	3.74E-32	1.00E-27	DHDDS	PREDICTED: dehydrodolichyl diphosphate synthase complex subunit DHDDS-like [Hyalella azteca]	Metabolism	Metabolism of terpenoids and polyketides	ko00900//Terpenoid backbone biosynthesis	K11778	-	-	-
0	ncbi_113805915	Cdc123	0.488732818	0.377123112	0.374010413	4.80E-28	1.28E-23	Cdc123	PREDICTED: cell division cycle protein 123 homolog [Hyalella azteca]	-	-	-	-	-	-	-
0	ncbi_113801067	VhaA	0.494216894	0.377873061	0.387242656	1.43E-25	3.84E-21	VhaA	V-ATPase A [Cherax destructor]	Metabolism;Human Diseases;Cellular Processes;Environmental Information Processing;Human Diseases;Metabolism;Human Diseases;Organismal Systems;Human Diseases;Organismal Systems	Global and overview maps;Infectious diseases;Transport and catabolism;Signal transduction;Infectious diseases;Energy metabolism;Infectious diseases;Nervous system;Immune diseases;Excretory system	ko01100//Metabolic pathways;ko05165//Human papillomavirus infection;ko04145//Phagosome;ko04150//mTOR signaling pathway;ko05110//Vibrio cholerae infection;ko00190//Oxidative phosphorylation;ko05120//Epithelial cell signaling in Helicobacter pylori infection;ko04721//Synaptic vesicle cycle;ko05323//Rheumatoid arthritis;ko04966//Collecting duct acid secretion	K02145;K02145;K02145;K02145;K02145;K02145;K02145;K02145;K02145;K02145	-	-	-
0	ncbi_113828857	PPIH	0.570715326	0.442885374	0.365837952	4.84E-24	1.30E-19	PPIH	PREDICTED: peptidyl-prolyl cis-trans isomerase H-like isoform X2 [Hyalella azteca]	Genetic Information Processing	Transcription	ko03040//Spliceosome	K09567	-	GO:0016859//cis-trans isomerase activity	GO:0044267//cellular protein metabolic process
0	ncbi_113800624	ncbi_113800624	2.194172723	1.680661558	0.384647866	1.93E-18	5.18E-14	--	TUS1306 [Penaeus monodon]	-	-	-	-	-	-	-
