# Supplementary material for: Single-cell RNA sequencing analysis of shrimp immune cells identifies macrophage-like phagocytes
Source: eLife. 2022 Oct 6;11:e80127. doi: 10.7554/eLife.80127 (PMC9584607; doi:10.7554/eLife.80127)
Supplement: Supplementary file 9. [file elife-80127-supp9.csv]

GeneID	Gene_cluster	P_value	FDR	Symbol	Description	KEGG_A_class	KEGG_B_class	Pathway	K_ID	GO Component	GO Function	GO Process
ncbi_5333205	5	2.38E-36	3.26E-35	COX1	-	-	-	-	-	-	-	-
ncbi_5333214	5	3.85E-130	1.23E-128	COX2	-	-	-	-	-	-	-	-
ncbi_5333207	3	6.22E-86	1.50E-84	ATP6	-	-	-	-	-	-	-	-
ncbi_5333215	5	3.80E-137	1.28E-135	COX3	-	-	-	-	-	-	-	-
ncbi_5333208	5	1.69E-17	1.57E-16	ND3	-	-	-	-	-	-	-	-
ncbi_5333211	5	2.18E-10	1.59E-09	ND5	-	-	-	-	-	-	-	-
ncbi_5333213	5	6.70E-10	4.78E-09	ND4	-	-	-	-	-	-	-	-
ncbi_5333206	5	6.87E-55	1.22E-53	CYTB	-	-	-	-	-	-	-	-
ncbi_5333210	5	2.19E-39	3.12E-38	ND1	-	-	-	-	-	-	-	-
ncbi_113809595	2	1.80E-298	1.03E-296	--	Up-regulated during skeletal muscle growth protein 5 [Zootermopsis nevadensis]	-	-	-	-	-	-	-
ncbi_113802946	1	1.34E-107	3.81E-106	moody	PREDICTED: protein trapped in endoderm-1-like [Hyalella azteca]	-	-	-	-	-	-	-
ncbi_113803037	1	0	0	--	-	-	-	-	-	-	-	-
ncbi_113806519	5	2.07E-17	1.92E-16	bmi1a	PREDICTED: polycomb complex protein BMI-1-B-like isoform X2 [Pygocentrus nattereri]	Human Diseases;Human Diseases;Cellular Processes	Cancers;Cancers;Cellular community - eukaryotes	ko05202//Transcriptional misregulation in cancers;ko05206//MicroRNAs in cancer;ko04550//Signaling pathways regulating pluripotency of stem cells	K11459;K11459;K11459	-	-	-
ncbi_113804967	3	8.11E-145	2.87E-143	--	-	-	-	-	-	-	-	-
ncbi_113805319	5	4.90E-47	7.81E-46	TTC31	PREDICTED: hsp70-Hsp90 organizing protein 1 isoform X2 [Crassostrea gigas]	-	-	-	-	-	-	-
ncbi_113805620	2	8.91E-45	1.37E-43	mRpS7	AGAP009613-PA [Anopheles gambiae str. PEST] [Anopheles gambiae]	Genetic Information Processing	Translation	ko03010//Ribosome	K02992	-	-	-
ncbi_113805535	4	1.59E-28	1.93E-27	Wbp11	PREDICTED: WW domain-binding protein 11-like [Hyalella azteca]	Genetic Information Processing	Transcription	ko03040//Spliceosome	K12866	-	-	-
ncbi_113806912	5	2.44E-120	7.40E-119	Baz1a	PREDICTED: bromodomain adjacent to zinc finger domain protein 1A-like [Hyalella azteca]	-	-	-	-	GO:0031010//ISWI-type complex	GO:0046872//metal ion binding;GO:0090595//acetyl-CoA:L-lysine N6-acetyltransferase	GO:0006260//DNA replication;GO:0010468//regulation of gene expression;GO:0016568//chromatin modification
ncbi_113806230	2	0	0	PSMA3	proteasome alpha 3 [Penaeus monodon]	Genetic Information Processing	Folding, sorting and degradation	ko03050//Proteasome	K02727	GO:0043231//intracellular membrane-bounded organelle;GO:0043234//protein complex	GO:0004175//endopeptidase activity	GO:0019941//modification-dependent protein catabolic process
ncbi_113807493	4	1.48E-11	1.13E-10	CSTF2	PREDICTED: cleavage stimulation factor subunit 2 tau variant-like isoform X1 [Hyalella azteca]	Genetic Information Processing	Translation	ko03015//mRNA surveillance pathway	K14407	GO:0005634//nucleus	-	-
ncbi_113809479	2	5.16E-09	3.54E-08	--	PREDICTED: uncharacterized protein LOC108681169 isoform X1 [Hyalella azteca]	-	-	-	-	-	-	-
ncbi_113808083	4	4.61E-28	5.55E-27	OXA1L	PREDICTED: mitochondrial inner membrane protein OXA1L [Musca domestica]	Genetic Information Processing	Folding, sorting and degradation	ko03060//Protein export	K03217	GO:0031224//intrinsic component of membrane	-	GO:0090150//establishment of protein localization to membrane
ncbi_113808397	2	2.05E-123	6.33E-122	--	PREDICTED: polyadenylate-binding protein-interacting protein 1-like isoform X2 [Parasteatoda tepidariorum]	Genetic Information Processing	Translation	ko03013//RNA transport	K14322	-	-	-
ncbi_113808636	2	1.19E-202	5.20E-201	--	-	-	-	-	-	-	-	-
ncbi_113809654	3	6.90E-79	1.57E-77	--	PREDICTED: proteoglycan 4-like [Hyalella azteca]	-	-	-	-	-	-	-
ncbi_113809946	2	8.98E-10	6.37E-09	At1g48650	ATP-dependent RNA helicase DHX30 [Daphnia magna]	-	-	-	-	-	-	-
ncbi_113810045	1	1.33E-140	4.63E-139	--	anti-lipopolysaccharide factor [Litopenaeus stylirostris]	-	-	-	-	-	-	-
ncbi_113811649	1	1.66E-16	1.50E-15	PIM3	PREDICTED: serine/threonine-protein kinase pim-3-like [Limulus polyphemus]	Human Diseases;Human Diseases;Human Diseases;Human Diseases;Environmental Information Processing	Cancers;Cancers;Endocrine and metabolic diseases;Cancers;Signal transduction	ko05200//Pathways in cancer;ko05206//MicroRNAs in cancer;ko04933//AGE-RAGE signaling pathway in diabetic complications;ko05221//Acute myeloid leukemia;ko04630//Jak-STAT signaling pathway	K04702;K04702;K04702;K04702;K04702	-	-	-
ncbi_113812483	2	2.31E-21	2.39E-20	ogdh	PREDICTED: 2-oxoglutarate dehydrogenase, mitochondrial isoform X6 [Microplitis demolitor]	Metabolism;Metabolism;Metabolism;Metabolism;Metabolism	Global and overview maps;Global and overview maps;Amino acid metabolism;Carbohydrate metabolism;Amino acid metabolism	ko01100//Metabolic pathways;ko01200//Carbon metabolism;ko00310//Lysine degradation;ko00020//Citrate cycle (TCA cycle);ko00380//Tryptophan metabolism	K00164;K00164;K00164;K00164;K00164	-	-	-
ncbi_113815403	4	3.34E-86	8.06E-85	b4	PREDICTED: sperm-specific protein PHI-2B/PHI-3-like [Limulus polyphemus]	-	-	-	-	-	-	-
ncbi_113816128	3	1.19E-20	1.20E-19	HPRT1	PREDICTED: hypoxanthine-guanine phosphoribosyltransferase-like [Hyalella azteca]	Metabolism;Metabolism;Metabolism	Global and overview maps;Nucleotide metabolism;Xenobiotics biodegradation and metabolism	ko01100//Metabolic pathways;ko00230//Purine metabolism;ko00983//Drug metabolism - other enzymes	K00760;K00760;K00760	-	GO:0016757//transferase activity, transferring glycosyl groups	-
ncbi_113818584	3	2.73E-10	1.97E-09	--	-	-	-	-	-	-	-	-
ncbi_113818490	5	4.56E-54	8.08E-53	--	-	-	-	-	-	-	-	-
ncbi_113817729	2	5.31E-23	5.69E-22	TRIP12	PREDICTED: E3 ubiquitin-protein ligase TRIP12-like isoform X1 [Limulus polyphemus]	Genetic Information Processing	Folding, sorting and degradation	ko04120//Ubiquitin mediated proteolysis	K10590	-	-	-
ncbi_113819117	5	8.77E-16	7.74E-15	--	-	-	-	-	-	-	-	-
ncbi_113819182	3	1.72E-241	8.45E-240	--	-	-	-	-	-	-	-	-
ncbi_113822607	3	1.85E-62	3.61E-61	--	PREDICTED: uncharacterized protein LOC108671593 [Hyalella azteca]	-	-	-	-	-	-	-
ncbi_113823061	4	6.04E-84	1.43E-82	Pcbp3	PREDICTED: poly(rC)-binding protein 4-like isoform X1 [Hyalella azteca]	-	-	-	-	-	-	-
ncbi_113823668	4	1.14E-249	5.75E-248	--	hypothetical protein [Triatoma infestans]	-	-	-	-	-	-	-
ncbi_113824546	2	2.73E-90	6.76E-89	D10Jhu81e	PREDICTED: ES1 protein homolog, mitochondrial-like [Hyalella azteca]	-	-	-	-	GO:0043231//intracellular membrane-bounded organelle	-	-
ncbi_113824931	4	5.55E-44	8.48E-43	Ccar1	PREDICTED: cell division cycle and apoptosis regulator protein 1-like isoform X1 [Solenopsis invicta]	-	-	-	-	-	-	-
ncbi_113825275	2	3.44E-204	1.51E-202	NIFK	PREDICTED: MKI67 FHA domain-interacting nucleolar phosphoprotein [Cerapachys biroi]	-	-	-	-	-	-	-
ncbi_113825626	1	1.19E-24	1.33E-23	Gad1	PREDICTED: glutamate decarboxylase-like [Hyalella azteca]	Metabolism;Organismal Systems;Metabolism;Metabolism;Metabolism;Human Diseases;Metabolism	Global and overview maps;Nervous system;Metabolism of other amino acids;Amino acid metabolism;Carbohydrate metabolism;Endocrine and metabolic diseases;Metabolism of other amino acids	ko01100//Metabolic pathways;ko04727//GABAergic synapse;ko00410//beta-Alanine metabolism;ko00250//Alanine, aspartate and glutamate metabolism;ko00650//Butanoate metabolism;ko04940//Type I diabetes mellitus;ko00430//Taurine and hypotaurine metabolism	K01580;K01580;K01580;K01580;K01580;K01580;K01580	-	-	-
ncbi_113826070	2	8.94E-62	1.73E-60	DDX24	PREDICTED: ATP-dependent RNA helicase DDX24 [Bombyx mori]	-	-	-	-	-	-	-
ncbi_113826307	2	7.76E-09	5.28E-08	CG11447	PREDICTED: rRNA methyltransferase 2, mitochondrial [Apis florea]	-	-	-	-	-	-	-
ncbi_113827277	4	5.07E-38	7.11E-37	--	trap [Procambarus clarkii]	Genetic Information Processing	Folding, sorting and degradation	ko04141//Protein processing in endoplasmic reticulum	K04571	-	-	-
ncbi_113829247	3	6.46E-210	2.89E-208	--	PREDICTED: EF-hand domain-containing protein D2 homolog isoform X2 [Hyalella azteca]	-	-	-	-	-	-	-
ncbi_113829328	3	0	0	GGH	PREDICTED: gamma-glutamyl hydrolase-like isoform X1 [Limulus polyphemus]	Metabolism;Human Diseases	Metabolism of cofactors and vitamins;Drug resistance	ko00790//Folate biosynthesis;ko01523//Antifolate resistance	K01307;K01307	-	-	-
ncbi_113829478	3	5.54E-12	4.30E-11	--	-	-	-	-	-	-	-	-
ncbi_113829536	3	3.87E-24	4.27E-23	--	-	-	-	-	-	-	-	-
ncbi_113829963	3	2.90E-21	2.98E-20	Spred2	PREDICTED: sprouty-related, EVH1 domain-containing protein 2-like isoform X2 [Parasteatoda tepidariorum]	-	-	-	-	-	-	-
ncbi_113801959	1	0	0	LIPF	triacylglycerol lipase [Portunus trituberculatus]	Cellular Processes;Organismal Systems;Metabolism	Transport and catabolism;Digestive system;Lipid metabolism	ko04142//Lysosome;ko04979//Cholesterol metabolism;ko00100//Steroid biosynthesis	K01052;K01052;K01052	-	-	-
ncbi_113801184	2	0	0	--	NADH dehydrogenase [ubiquinone] 1 beta subcomplex subunit 4 [Zootermopsis nevadensis]	Metabolism;Organismal Systems;Human Diseases;Human Diseases;Human Diseases;Human Diseases;Metabolism;Organismal Systems	Global and overview maps;Environmental adaptation;Neurodegenerative diseases;Neurodegenerative diseases;Endocrine and metabolic diseases;Neurodegenerative diseases;Energy metabolism;Nervous system	ko01100//Metabolic pathways;ko04714//Thermogenesis;ko05016//Huntington disease;ko05010//Alzheimer disease;ko04932//Non-alcoholic fatty liver disease (NAFLD);ko05012//Parkinson disease;ko00190//Oxidative phosphorylation;ko04723//Retrograde endocannabinoid signaling	K03960;K03960;K03960;K03960;K03960;K03960;K03960;K03960	-	GO:0016491//oxidoreductase activity	-
ncbi_113801085	2	6.68E-12	5.17E-11	--	mitochondrial transcription termination factor [Danaus plexippus]	-	-	-	-	-	-	-
ncbi_113802130	3	4.02E-168	1.56E-166	--	caspase 3 [Litopenaeus vannamei]	-	-	-	-	-	-	-
ncbi_113802447	2	2.80E-18	2.66E-17	PDE12	PREDICTED: 2',5'-phosphodiesterase 12-like [Limulus polyphemus]	-	-	-	-	-	-	-
ncbi_113802919	2	1.94E-17	1.81E-16	ppp1r11	PREDICTED: protein phosphatase 1 regulatory subunit 11-like [Hyalella azteca]	-	-	-	-	-	-	-
ncbi_113802926	4	2.08E-60	3.99E-59	TARDBP	TAR DNA-binding protein 43 [Zootermopsis nevadensis]	-	-	-	-	-	-	-
ncbi_113802969	2	2.74E-71	5.84E-70	Rrp7a	Ribosomal RNA-processing protein 7 A, partial [Haliaeetus albicilla]	Genetic Information Processing	Translation	ko03008//Ribosome biogenesis in eukaryotes	K14545	-	-	-
ncbi_113803139	5	2.75E-16	2.47E-15	SNX6	PREDICTED: sorting nexin-6-like isoform X2 [Parasteatoda tepidariorum]	Cellular Processes	Transport and catabolism	ko04144//Endocytosis	K17920	-	-	-
ncbi_113803354	3	0	0	Cd63	tetraspanins-like protein CD63 [Litopenaeus vannamei]	Human Diseases;Cellular Processes	Cancers;Transport and catabolism	ko05205//Proteoglycans in cancer;ko04142//Lysosome	K06497;K06497	-	-	-
ncbi_113803474	4	1.36E-37	1.91E-36	sn	PREDICTED: protein singed-like isoform X1 [Hyalella azteca]	Human Diseases	Cancers	ko05206//MicroRNAs in cancer	K17455	-	GO:0003779//actin binding	-
ncbi_113803514	4	1.34E-13	1.10E-12	Rfc4	PREDICTED: replication factor C subunit 4-like [Hyalella azteca]	Genetic Information Processing;Genetic Information Processing;Genetic Information Processing	Replication and repair;Replication and repair;Replication and repair	ko03420//Nucleotide excision repair;ko03030//DNA replication;ko03430//Mismatch repair	K10755;K10755;K10755	-	-	-
ncbi_113803543	3	1.30E-17	1.21E-16	Rnf167	PREDICTED: E3 ubiquitin-protein ligase RNF13-like isoform X1 [Harpegnathos saltator]	-	-	-	-	-	-	-
ncbi_113803588	4	4.75E-74	1.03E-72	Ddx46	PREDICTED: probable ATP-dependent RNA helicase DDX46 isoform X3 [Hyalella azteca]	Genetic Information Processing	Transcription	ko03040//Spliceosome	K12811	-	GO:0017111//nucleoside-triphosphatase activity;GO:0032550//purine ribonucleoside binding	-
ncbi_113803635	2	0	0	RpS10	40S ribosomal protein S10 [Pseudodiaptomus poplesia]	Genetic Information Processing	Translation	ko03010//Ribosome	K02947	-	-	-
ncbi_113803691	2	3.05E-40	4.40E-39	14-3-3zeta	14-3-3 [Marsupenaeus japonicus]	Environmental Information Processing;Environmental Information Processing;Environmental Information Processing;Human Diseases;Environmental Information Processing;Human Diseases;Human Diseases;Cellular Processes;Organismal Systems;Cellular Processes;Human Diseases	Signal transduction;Signal transduction;Signal transduction;Infectious diseases;Signal transduction;Cancers;Infectious diseases;Cell growth and death;Aging;Cell growth and death;Infectious diseases	ko04151//PI3K-Akt signaling pathway;ko04390//Hippo signaling pathway;ko04013//MAPK signaling pathway - fly;ko05130//Pathogenic Escherichia coli infection;ko04391//Hippo signaling pathway -fly;ko05203//Viral carcinogenesis;ko05169//Epstein-Barr virus infection;ko04110//Cell cycle;ko04212//Longevity regulating pathway - worm;ko04114//Oocyte meiosis;ko05161//Hepatitis B	K16197;K16197;K16197;K16197;K16197;K16197;K16197;K16197;K16197;K16197;K16197	-	-	-
ncbi_113803746	2	1.04E-44	1.60E-43	14-3-3zeta	14-3-3 protein zeta [Papilio machaon]	Environmental Information Processing;Environmental Information Processing;Environmental Information Processing;Human Diseases;Environmental Information Processing;Human Diseases;Human Diseases;Cellular Processes;Organismal Systems;Cellular Processes;Human Diseases	Signal transduction;Signal transduction;Signal transduction;Infectious diseases;Signal transduction;Cancers;Infectious diseases;Cell growth and death;Aging;Cell growth and death;Infectious diseases	ko04151//PI3K-Akt signaling pathway;ko04390//Hippo signaling pathway;ko04013//MAPK signaling pathway - fly;ko05130//Pathogenic Escherichia coli infection;ko04391//Hippo signaling pathway -fly;ko05203//Viral carcinogenesis;ko05169//Epstein-Barr virus infection;ko04110//Cell cycle;ko04212//Longevity regulating pathway - worm;ko04114//Oocyte meiosis;ko05161//Hepatitis B	K16197;K16197;K16197;K16197;K16197;K16197;K16197;K16197;K16197;K16197;K16197	-	-	-
ncbi_113803701	2	3.25E-140	1.12E-138	MRTO4	mRNA turnover protein 4 [Daphnia magna]	-	-	-	-	-	-	-
ncbi_113803835	2	5.58E-67	1.14E-65	TRIADDRAFT_35934	PREDICTED: ubiquitin-fold modifier-conjugating enzyme 1 [Cephus cinctus]	-	-	-	-	-	-	-
ncbi_113803881	2	1.68E-49	2.80E-48	holn1	PREDICTED: CD2 antigen cytoplasmic tail-binding protein 2 homolog [Hyalella azteca]	-	-	-	-	-	-	-
ncbi_113803927	2	1.06E-152	3.89E-151	bcn92	PREDICTED: LYR motif-containing protein 4-like isoform X2 [Branchiostoma belcheri]	-	-	-	-	-	-	-
ncbi_113803914	4	1.06E-15	9.30E-15	Golt1b	PREDICTED: vesicle transport protein GOT1B-like [Hyalella azteca]	-	-	-	-	-	-	-
ncbi_113804002	2	6.52E-35	8.74E-34	--	Nucleolar protein 11 [Zootermopsis nevadensis]	-	-	-	-	-	-	-
ncbi_113804209	4	3.43E-19	3.34E-18	--	-	-	-	-	-	-	-	-
ncbi_113804222	2	8.67E-37	1.20E-35	rae1	PREDICTED: mRNA export factor-like [Hyalella azteca]	Genetic Information Processing;Human Diseases	Translation;Infectious diseases	ko03013//RNA transport;ko05164//Influenza A	K14298;K14298	-	-	-
ncbi_113804281	4	4.43E-130	1.42E-128	Dsp1	HMGBb [Litopenaeus vannamei]	Cellular Processes;Cellular Processes;Genetic Information Processing	Cell growth and death;Transport and catabolism;Replication and repair	ko04217//Necroptosis;ko04140//Autophagy - animal;ko03410//Base excision repair	K10802;K10802;K10802	-	GO:0004672//protein kinase activity;GO:0032550//purine ribonucleoside binding	GO:0006464//cellular protein modification process
ncbi_113804200	1	5.07E-174	2.01E-172	PPAF2	masquerade-like protein [Pacifastacus leniusculus]	-	-	-	-	-	-	-
ncbi_113804623	2	8.70E-59	1.62E-57	ppan	PREDICTED: protein Peter pan [Tribolium castaneum]	-	-	-	-	-	-	-
ncbi_113804634	2	7.61E-37	1.05E-35	prpf31	PREDICTED: U4/U6 small nuclear ribonucleoprotein Prp31-like [Hyalella azteca]	Genetic Information Processing	Transcription	ko03040//Spliceosome	K12844	-	-	-
ncbi_113804796	1	4.09E-16	3.66E-15	pigs	GAS2 protein 1 [Daphnia magna]	-	-	-	-	-	-	-
ncbi_113804806	4	5.38E-69	1.12E-67	ALOX5	lipoxygenase [Penaeus monodon]	Metabolism;Human Diseases;Organismal Systems;Metabolism;Organismal Systems;Organismal Systems	Global and overview maps;Infectious diseases;Nervous system;Lipid metabolism;Endocrine system;Immune system	ko01100//Metabolic pathways;ko05145//Toxoplasmosis;ko04726//Serotonergic synapse;ko00590//Arachidonic acid metabolism;ko04913//Ovarian Steroidogenesis;ko04664//Fc epsilon RI signaling pathway	K00461;K00461;K00461;K00461;K00461;K00461	-	-	-
ncbi_113804824	4	1.19E-23	1.30E-22	banf1	Barrier-to-autointegration factor [Daphnia magna]	-	-	-	-	-	-	-
ncbi_113804843	4	1.47E-20	1.48E-19	CENPX	PREDICTED: centromere protein X [Strongylocentrotus purpuratus]	Genetic Information Processing	Replication and repair	ko03460//Fanconi anemia pathway	K15360	GO:0000775//chromosome, centromeric region;GO:0043231//intracellular membrane-bounded organelle;GO:0043234//protein complex	GO:0003677//DNA binding	GO:0006259//DNA metabolic process;GO:0006974//cellular response to DNA damage stimulus;GO:0006996//organelle organization;GO:0007049//cell cycle
ncbi_113804858	1	3.08E-62	6.00E-61	--	-	-	-	-	-	-	-	-
ncbi_113804928	2	2.10E-97	5.47E-96	CAPRIN1	PREDICTED: caprin-1 isoform X2 [Crassostrea gigas]	-	-	-	-	-	-	-
ncbi_113805103	2	0	0	RPS12	40S ribosomal protein [Perinereis aibuhitensis]	Genetic Information Processing	Translation	ko03010//Ribosome	K02951	GO:0030529//intracellular ribonucleoprotein complex	-	GO:0010467//gene expression
ncbi_113805306	2	4.08E-29	4.99E-28	Sucla2	PREDICTED: succinyl-CoA ligase [ADP-forming] subunit beta, mitochondrial-like [Hyalella azteca]	Metabolism;Metabolism;Metabolism;Metabolism	Global and overview maps;Global and overview maps;Carbohydrate metabolism;Carbohydrate metabolism	ko01100//Metabolic pathways;ko01200//Carbon metabolism;ko00020//Citrate cycle (TCA cycle);ko00640//Propanoate metabolism	K01900;K01900;K01900;K01900	-	-	-
ncbi_113805314	2	1.96E-31	2.50E-30	--	steroid receptor RNA activator 1 [Xenopus tropicalis]	-	-	-	-	GO:0044464//cell part	-	-
ncbi_113805406	4	7.65E-16	6.78E-15	maea	erythroblast macrophage protein emp [Riptortus pedestris]	-	-	-	-	-	-	-
ncbi_113805486	2	1.08E-22	1.15E-21	--	Zinc finger CCHC domain-containing protein [Daphnia magna]	Genetic Information Processing	Folding, sorting and degradation	ko03018//RNA degradation	K12597	-	-	-
ncbi_113805681	2	1.40E-45	2.18E-44	TRAPPC6B	PREDICTED: trafficking protein particle complex subunit 6B-like [Hyalella azteca]	-	-	-	-	-	-	-
ncbi_113806000	2	6.32E-18	5.96E-17	ttc37	PREDICTED: tetratricopeptide repeat protein 37-like [Hyalella azteca]	Genetic Information Processing	Folding, sorting and degradation	ko03018//RNA degradation	K12600	-	-	-
ncbi_113806249	3	4.76E-31	6.04E-30	--	-	-	-	-	-	-	-	-
ncbi_113806290	2	3.43E-09	2.38E-08	Ptcd2	PREDICTED: pentatricopeptide repeat-containing protein 2, mitochondrial-like [Limulus polyphemus]	-	-	-	-	-	-	-
ncbi_113806297	4	0	0	cyn-5	PREDICTED: peptidyl-prolyl cis-trans isomerase 5 [Ceratitis capitata]	-	-	-	-	-	GO:0016859//cis-trans isomerase activity	GO:0044267//cellular protein metabolic process
ncbi_113806529	2	0	0	RpL24	ribosomal protein L24 [Marsupenaeus japonicus]	Genetic Information Processing	Translation	ko03010//Ribosome	K02896	-	-	-
ncbi_113806538	4	9.47E-54	1.67E-52	hts	PREDICTED: protein hu-li tai shao-like [Hyalella azteca]	-	-	-	-	-	-	-
ncbi_113806735	2	2.10E-117	6.28E-116	PARVB	Beta-parvin [Zootermopsis nevadensis]	Cellular Processes	Cellular community - eukaryotes	ko04510//Focal adhesion	K06275	-	-	-
ncbi_113806760	2	6.38E-39	9.09E-38	dia	PREDICTED: protein diaphanous-like, partial [Hyalella azteca]	Cellular Processes	Cell motility	ko04810//Regulation of actin cytoskeleton	K05741	-	-	-
ncbi_113806862	2	6.79E-16	6.04E-15	--	-	-	-	-	-	-	-	-
ncbi_113806869	2	3.42E-53	5.97E-52	Cfdp1	PREDICTED: craniofacial development protein 1-like isoform X2 [Hyalella azteca]	-	-	-	-	-	-	-
ncbi_113806880	5	4.00E-78	9.00E-77	AGO1	argonaute 2 [Litopenaeus vannamei]	-	-	-	-	-	-	-
ncbi_113806913	3	0	0	NPC2	Niemann-Pick type C-2-like protein [Penaeus monodon]	Cellular Processes;Organismal Systems	Transport and catabolism;Digestive system	ko04142//Lysosome;ko04979//Cholesterol metabolism	K13443;K13443	-	-	-
ncbi_113806841	4	6.83E-09	4.66E-08	PDIA4	Protein disulfide-isomerase [Daphnia magna]	Genetic Information Processing;Human Diseases;Organismal Systems	Folding, sorting and degradation;Infectious diseases;Endocrine system	ko04141//Protein processing in endoplasmic reticulum;ko05110//Vibrio cholerae infection;ko04918//Thyroid hormone synthesis	K09582;K09582;K09582	GO:0044464//cell part	-	GO:0009987//cellular process
ncbi_113807042	4	1.21E-09	8.53E-09	Cttn	PREDICTED: src substrate cortactin [Diaphorina citri]	Human Diseases;Cellular Processes;Human Diseases;Human Diseases;Human Diseases	Cancers;Cellular community - eukaryotes;Infectious diseases;Infectious diseases;Infectious diseases	ko05205//Proteoglycans in cancer;ko04530//Tight junction;ko05130//Pathogenic Escherichia coli infection;ko05131//Shigellosis;ko05100//Bacterial invasion of epithelial cells	K06106;K06106;K06106;K06106;K06106	GO:0005924//cell-substrate adherens junction;GO:0015629//actin cytoskeleton;GO:0031252//cell leading edge;GO:0031988//membrane-bounded vesicle;GO:0034705//potassium channel complex;GO:0044309//neuron spine;GO:0044444//cytoplasmic part;GO:0051233//spindle midzone	GO:0005515//protein binding	GO:0001944//vasculature development;GO:0006897//endocytosis;GO:0006928//movement of cell or subcellular component;GO:0007045//cell-substrate adherens junction assembly;GO:0007417//central nervous system development;GO:0010506//regulation of autophagy;GO:0015031//protein transport;GO:0030031//cell projection assembly;GO:0030833//regulation of actin filament polymerization;GO:0043954//cellular comp…
ncbi_113807060	2	3.42E-100	9.07E-99	ATRX	PREDICTED: transcriptional regulator ATRX-like [Hyalella azteca]	-	-	-	-	-	-	-
ncbi_113807069	4	2.36E-81	5.47E-80	Hcls1	PREDICTED: src substrate cortactin [Amyelois transitella]	Human Diseases;Cellular Processes;Human Diseases;Human Diseases;Human Diseases	Cancers;Cellular community - eukaryotes;Infectious diseases;Infectious diseases;Infectious diseases	ko05205//Proteoglycans in cancer;ko04530//Tight junction;ko05130//Pathogenic Escherichia coli infection;ko05131//Shigellosis;ko05100//Bacterial invasion of epithelial cells	K06106;K06106;K06106;K06106;K06106	-	-	-
ncbi_113807113	2	9.89E-49	1.62E-47	--	GM20712 [Drosophila sechellia]	-	-	-	-	-	-	-
ncbi_113807219	4	1.02E-63	2.03E-62	PPIE	PREDICTED: peptidyl-prolyl cis-trans isomerase E-like [Saccoglossus kowalevskii]	Genetic Information Processing	Transcription	ko03040//Spliceosome	K09564	-	GO:0003676//nucleic acid binding;GO:0016859//cis-trans isomerase activity	GO:0018208//peptidyl-proline modification
ncbi_113807197	3	4.14E-25	4.69E-24	LIN9	Lin-9-like protein [Zootermopsis nevadensis]	Cellular Processes	Cell growth and death	ko04218//Cellular senescence	K21773	-	-	-
ncbi_113807289	5	3.10E-28	3.74E-27	SLC30A1	Zinc/cadmium resistance protein, partial [Stegodyphus mimosarum]	Organismal Systems	Digestive system	ko04978//Mineral absorption	K14688	-	-	-
ncbi_113807334	1	2.14E-293	1.21E-291	--	PREDICTED: uncharacterized protein LOC108670255 [Hyalella azteca]	-	-	-	-	-	-	-
ncbi_113807496	2	1.70E-12	1.35E-11	CDK8	CDK8 [Penaeus monodon]	-	-	-	-	-	GO:0016740//transferase activity;GO:0032550//purine ribonucleoside binding	GO:0006464//cellular protein modification process
ncbi_113807513	4	1.53E-24	1.71E-23	Taf7	PREDICTED: transcription initiation factor TFIID subunit 7 [Athalia rosae]	Genetic Information Processing	Transcription	ko03022//Basal transcription factors	K03132	-	-	-
ncbi_113807796	5	5.84E-09	3.99E-08	--	PREDICTED: titin homolog [Apis mellifera]	-	-	-	-	-	-	-
ncbi_113807818	5	1.51E-48	2.45E-47	--	PREDICTED: uncharacterized protein LOC108677898 isoform X1 [Hyalella azteca]	-	-	-	-	-	-	-
ncbi_113807865	2	3.16E-46	4.98E-45	Nvl	Nuclear valosin-containing protein [Daphnia magna]	Genetic Information Processing	Translation	ko03008//Ribosome biogenesis in eukaryotes	K14571	-	-	-
ncbi_113807881	2	1.26E-16	1.15E-15	Nat9	PREDICTED: N-acetyltransferase 9-like protein isoform X2 [Fopius arisanus]	-	-	-	-	-	-	-
ncbi_113807991	2	1.27E-48	2.06E-47	Cisd2	PREDICTED: CDGSH iron-sulfur domain-containing protein 2 homolog B-like [Hyalella azteca]	-	-	-	-	-	-	-
ncbi_113808236	5	1.22E-11	9.33E-11	RANBP3	PREDICTED: ran-binding protein 3-like isoform X2 [Hyalella azteca]	-	-	-	-	-	-	-
ncbi_113808292	2	3.98E-49	6.57E-48	EIF2B3	PREDICTED: translation initiation factor eIF-2B subunit gamma-like isoform X1 [Lingula anatina]	Genetic Information Processing	Translation	ko03013//RNA transport	K03241	-	-	-
ncbi_113808328	4	1.47E-61	2.84E-60	phyhd1	Phytanoyl-CoA dioxygenase domain-containing protein 1 [Daphnia magna]	-	-	-	-	-	-	-
ncbi_113808387	1	2.74E-23	2.95E-22	--	PREDICTED: nucleobindin-2 isoform X1 [Neodiprion lecontei]	-	-	-	-	-	-	-
ncbi_113808424	4	1.87E-13	1.53E-12	CYB561	PREDICTED: cytochrome b reductase 1-like [Ceratosolen solmsi marchali]	-	-	-	-	-	-	-
ncbi_113808091	4	1.28E-38	1.81E-37	O-fut1	GDP-fucose protein O-fucosyltransferase 1 [Zootermopsis nevadensis]	Metabolism	Glycan biosynthesis and metabolism	ko00514//Other types of O-glycan biosynthesis	K03691	-	GO:0008417//fucosyltransferase activity	GO:0006493//protein O-linked glycosylation
ncbi_113808452	2	2.45E-123	7.57E-122	Arpc4	arp2/3 complex 20 kd subunit [Scylla paramamosain]	Cellular Processes;Cellular Processes;Human Diseases;Human Diseases;Human Diseases;Human Diseases;Organismal Systems	Cell motility;Transport and catabolism;Infectious diseases;Infectious diseases;Infectious diseases;Infectious diseases;Immune system	ko04810//Regulation of actin cytoskeleton;ko04144//Endocytosis;ko05130//Pathogenic Escherichia coli infection;ko05131//Shigellosis;ko05132//Salmonella infection;ko05100//Bacterial invasion of epithelial cells;ko04666//Fc gamma R-mediated phagocytosis	K05755;K05755;K05755;K05755;K05755;K05755;K05755	-	-	-
ncbi_113808462	5	3.04E-19	2.96E-18	Pgrmc1	progestin membrane receptor component 1 [Penaeus monodon]	-	-	-	-	-	-	-
ncbi_113808618	3	1.99E-14	1.69E-13	--	-	-	-	-	-	-	-	-
ncbi_113808586	2	3.55E-53	6.19E-52	TMEM199	PREDICTED: transmembrane protein 199-like [Hyalella azteca]	-	-	-	-	-	-	-
ncbi_113808676	5	3.22E-81	7.47E-80	Ctdp1	PREDICTED: RNA polymerase II subunit A C-terminal domain phosphatase [Nicrophorus vespilloides]	-	-	-	-	-	-	-
ncbi_113808687	4	9.17E-12	7.06E-11	tmx3	Thioredoxin [Oryctes borbonicus]	-	-	-	-	-	-	-
ncbi_113808704	2	4.01E-37	5.57E-36	mrps-17	mitochondrial ribosomal protein S17 [Danaus plexippus]	Genetic Information Processing	Translation	ko03010//Ribosome	K02961	GO:0005622//intracellular	-	-
ncbi_113808813	5	1.54E-37	2.15E-36	nas-15	Low choriolytic enzyme [Daphnia magna]	-	-	-	-	-	-	-
ncbi_113808858	3	1.30E-16	1.18E-15	Ubl3	PREDICTED: ubiquitin-like protein 3 [Hyalella azteca]	-	-	-	-	-	-	-
ncbi_113808868	4	6.96E-10	4.96E-09	CETN1	PREDICTED: caltractin-like isoform X1 [Limulus polyphemus]	-	-	-	-	GO:0005815//microtubule organizing center;GO:0031513//nonmotile primary cilium	GO:0015631//tubulin binding;GO:0016628//oxidoreductase activity, acting on the CH-CH group of donors, NAD or NADP as acceptor;GO:0032403//protein complex binding;GO:0046872//metal ion binding	GO:0000280//nuclear division;GO:0009408//response to heat;GO:0044710//single-organism metabolic process;GO:0044763//single-organism cellular process
ncbi_113809043	2	3.38E-21	3.47E-20	SF3A1	PREDICTED: splicing factor 3A subunit 1 [Halyomorpha halys]	Genetic Information Processing	Transcription	ko03040//Spliceosome	K12825	GO:0005634//nucleus	-	-
ncbi_113809104	1	0	0	--	hypothetical protein TTHERM_01000170 [Tetrahymena thermophila SB210]	-	-	-	-	-	-	-
ncbi_113809342	3	2.62E-16	2.36E-15	--	-	-	-	-	-	-	-	-
ncbi_113809358	2	1.98E-16	1.79E-15	--	Protein anon-73B1 [Orchesella cincta]	-	-	-	-	-	-	-
ncbi_113809438	3	8.45E-36	1.15E-34	--	-	-	-	-	-	-	-	-
ncbi_113809465	2	6.29E-27	7.37E-26	--	-	-	-	-	-	-	-	-
ncbi_113809588	1	7.95E-62	1.54E-60	SLC31A1	PREDICTED: high affinity copper uptake protein 1 isoform X1 [Polistes canadensis]	Human Diseases;Organismal Systems	Drug resistance;Digestive system	ko01524//Platinum drug resistance;ko04978//Mineral absorption	K14686;K14686	-	-	-
ncbi_113809629	4	2.94E-86	7.11E-85	TMEM258	PREDICTED: transmembrane protein 258-like [Strongylocentrotus purpuratus]	-	-	-	-	GO:0031224//intrinsic component of membrane	-	-
ncbi_113809612	2	3.58E-12	2.80E-11	cue	Low-density lipoprotein receptor ldl [Daphnia magna]	-	-	-	-	-	-	-
ncbi_113809669	4	1.11E-29	1.37E-28	Spt5	PREDICTED: transcription elongation factor SPT5-like [Hyalella azteca]	-	-	-	-	-	-	GO:0006355//regulation of transcription, DNA-templated
ncbi_113809733	4	4.97E-09	3.41E-08	Igbp1b	Two A-associated protein of 42kDa [Daphnia magna]	Cellular Processes;Cellular Processes	Transport and catabolism;Transport and catabolism	ko04140//Autophagy - animal;ko04136//Autophagy - other eukaryotes	K17606;K17606	-	-	-
ncbi_113810192	3	4.85E-30	6.04E-29	RPL12	PREDICTED: 60S ribosomal protein L12 [Loxodonta africana]	Genetic Information Processing	Translation	ko03010//Ribosome	K02870	GO:0005840//ribosome;GO:0043231//intracellular membrane-bounded organelle;GO:0044446//intracellular organelle part	-	-
ncbi_113810210	2	3.48E-53	6.07E-52	Cops4	PREDICTED: COP9 signalosome complex subunit 4-like [Hyalella azteca]	-	-	-	-	-	-	-
ncbi_113810230	2	3.75E-12	2.93E-11	mRpL32	PREDICTED: 39S ribosomal protein L32, mitochondrial [Apis cerana]	Genetic Information Processing	Translation	ko03010//Ribosome	K02911	-	-	-
ncbi_113810241	5	6.11E-103	1.66E-101	csnk1a1	PREDICTED: casein kinase I [Hyalella azteca]	Human Diseases;Human Diseases;Environmental Information Processing;Human Diseases;Human Diseases;Environmental Information Processing;Environmental Information Processing	Infectious diseases;Cancers;Signal transduction;Cancers;Cancers;Signal transduction;Signal transduction	ko05165//Human papillomavirus infection;ko05225//Hepatocellular carcinoma;ko04310//Wnt signaling pathway;ko05224//Breast cancer;ko05226//Gastric cancer;ko04340//Hedgehog signaling pathway;ko04341//Hedgehog signaling pathway - fly	K08957;K08957;K08957;K08957;K08957;K08957;K08957	-	-	-
ncbi_113810264	4	9.58E-42	1.42E-40	Arl1	ADP-ribosylation factor protein 1, partial [Daphnia magna]	-	-	-	-	GO:0044464//cell part	GO:0032550//purine ribonucleoside binding	GO:0015031//protein transport;GO:0035556//intracellular signal transduction
ncbi_113810293	2	4.90E-28	5.89E-27	TP53RK	PREDICTED: TP53-regulating kinase-like [Hyalella azteca]	-	-	-	-	GO:0043231//intracellular membrane-bounded organelle	GO:0004672//protein kinase activity;GO:0005515//protein binding	GO:0006464//cellular protein modification process
ncbi_113810323	2	4.18E-19	4.06E-18	--	GH11849 [Drosophila grimshawi]	-	-	-	-	-	-	-
ncbi_113810486	5	1.73E-11	1.32E-10	Inx3	innexin 7 [Homarus americanus]	-	-	-	-	-	-	-
ncbi_113810596	2	1.79E-16	1.62E-15	PSMD5	PREDICTED: 26S proteasome non-ATPase regulatory subunit 5-like [Branchiostoma belcheri]	-	-	-	-	-	-	-
ncbi_113810623	2	4.69E-23	5.04E-22	chmp4b	PREDICTED: charged multivesicular body protein 4b-like [Hyalella azteca]	Cellular Processes;Cellular Processes	Transport and catabolism;Cell growth and death	ko04144//Endocytosis;ko04217//Necroptosis	K12194;K12194	-	-	-
ncbi_113810698	5	1.10E-18	1.06E-17	Mlp84B	Cysteine and glycine-rich protein 2, partial [Stegodyphus mimosarum]	-	-	-	-	-	-	-
ncbi_113810935	3	2.05E-49	3.42E-48	Arhgap20	Rho GTPase-activating protein 20 [Trachymyrmex septentrionalis]	-	-	-	-	-	-	-
ncbi_113811161	3	6.77E-12	5.23E-11	TMEM131	PREDICTED: transmembrane protein 131-like isoform X1 [Parasteatoda tepidariorum]	-	-	-	-	-	-	-
ncbi_113811236	3	5.05E-16	4.50E-15	Pum2	PREDICTED: pumilio homolog 2-like [Hyalella azteca]	-	-	-	-	-	-	-
ncbi_113811481	5	6.06E-59	1.13E-57	--	PREDICTED: von Willebrand factor A domain-containing protein 5A isoform X6 [Crassostrea gigas]	-	-	-	-	-	-	-
ncbi_113811573	4	6.46E-27	7.56E-26	ncm	PREDICTED: pre-mRNA-splicing factor CWC22 homolog isoform X1 [Hyalella azteca]	-	-	-	-	-	-	-
ncbi_113811594	2	6.39E-91	1.59E-89	HGV2	nuclear autoantigenic sperm protein [Litopenaeus vannamei]	-	-	-	-	-	-	-
ncbi_113811702	4	0	0	Igfbp7	single insulin-like growth factor-binding domain protein-2 [Cupiennius salei]	-	-	-	-	-	-	-
ncbi_113811720	2	1.90E-103	5.20E-102	RIOK1	AAEL011857-PA [Aedes aegypti]	Genetic Information Processing	Translation	ko03008//Ribosome biogenesis in eukaryotes	K07178	-	-	-
ncbi_113811762	4	5.69E-13	4.59E-12	--	PREDICTED: DNA polymerase III PolC-type-like isoform X2 [Poecilia reticulata]	-	-	-	-	-	-	-
ncbi_113811837	2	1.60E-74	3.50E-73	--	PREDICTED: DNA-directed RNA polymerase III subunit RPC7-like [Polistes dominula]	Metabolism;Metabolism;Human Diseases;Metabolism;Genetic Information Processing;Organismal Systems	Global and overview maps;Nucleotide metabolism;Infectious diseases;Nucleotide metabolism;Transcription;Immune system	ko01100//Metabolic pathways;ko00230//Purine metabolism;ko05169//Epstein-Barr virus infection;ko00240//Pyrimidine metabolism;ko03020//RNA polymerase;ko04623//Cytosolic DNA-sensing pathway	K03024;K03024;K03024;K03024;K03024;K03024	-	-	-
ncbi_113812245	2	4.04E-09	2.80E-08	--	CruI-1 [Marsupenaeus japonicus]	-	-	-	-	-	-	-
ncbi_113812037	3	1.22E-33	1.60E-32	--	PREDICTED: SCO-spondin-like [Branchiostoma belcheri]	-	-	-	-	GO:0016020//membrane	GO:0005515//protein binding	GO:0050789//regulation of biological process
ncbi_113812044	2	3.83E-65	7.68E-64	eif3e	PREDICTED: eukaryotic translation initiation factor 3 subunit E-B-like isoform X2 [Hyalella azteca]	Genetic Information Processing;Human Diseases	Translation;Infectious diseases	ko03013//RNA transport;ko05160//Hepatitis C	K03250;K03250	GO:0016604//nuclear body;GO:0031988//membrane-bounded vesicle;GO:0043234//protein complex;GO:0070993//translation preinitiation complex	GO:0005515//protein binding;GO:0008135//translation factor activity, RNA binding	GO:0006417//regulation of translation;GO:0022618//ribonucleoprotein complex assembly
ncbi_113812117	2	4.84E-09	3.32E-08	ptges2	prostaglandin E synthase 2 [Penaeus monodon]	Metabolism;Metabolism	Global and overview maps;Lipid metabolism	ko01100//Metabolic pathways;ko00590//Arachidonic acid metabolism	K05309;K05309	-	-	-
ncbi_113812314	2	1.41E-38	1.99E-37	--	ribosomal protein L30 [Coptotermes formosanus]	Genetic Information Processing	Translation	ko03010//Ribosome	K02907	-	-	-
ncbi_113812156	4	7.16E-21	7.27E-20	Pcid2	PREDICTED: PCI domain-containing protein 2-like [Hyalella azteca]	-	-	-	-	-	-	GO:0010468//regulation of gene expression;GO:0044260//cellular macromolecule metabolic process;GO:0044763//single-organism cellular process;GO:0045861//negative regulation of proteolysis;GO:0048522//positive regulation of cellular process;GO:0048534//hematopoietic or lymphoid organ development
ncbi_113812177	5	9.65E-24	1.06E-22	AKR1B1	prostaglandin F synthase [Penaeus monodon]	Metabolism;Metabolism;Metabolism;Metabolism;Metabolism;Metabolism	Global and overview maps;Lipid metabolism;Carbohydrate metabolism;Carbohydrate metabolism;Metabolism of cofactors and vitamins;Carbohydrate metabolism	ko01100//Metabolic pathways;ko00561//Glycerolipid metabolism;ko00051//Fructose and mannose metabolism;ko00040//Pentose and glucuronate interconversions;ko00790//Folate biosynthesis;ko00052//Galactose metabolism	K00011;K00011;K00011;K00011;K00011;K00011	-	-	-
ncbi_113812186	2	4.28E-14	3.60E-13	ZMIZ1	PREDICTED: zinc finger MIZ domain-containing protein 1 isoform X3 [Aethina tumida]	-	-	-	-	-	-	-
ncbi_113812324	4	6.33E-305	3.69E-303	--	PREDICTED: rac-like GTP-binding protein ARAC7 [Crassostrea gigas]	-	-	-	-	-	-	-
ncbi_113812458	2	2.06E-22	2.18E-21	--	-	-	-	-	-	-	-	-
ncbi_113812470	2	5.16E-28	6.19E-27	SdhB	PREDICTED: succinate dehydrogenase [ubiquinone] iron-sulfur subunit, mitochondrial-like [Hyalella azteca]	Metabolism;Organismal Systems;Human Diseases;Metabolism;Human Diseases;Human Diseases;Human Diseases;Metabolism;Metabolism	Global and overview maps;Environmental adaptation;Neurodegenerative diseases;Global and overview maps;Neurodegenerative diseases;Endocrine and metabolic diseases;Neurodegenerative diseases;Energy metabolism;Carbohydrate metabolism	ko01100//Metabolic pathways;ko04714//Thermogenesis;ko05016//Huntington disease;ko01200//Carbon metabolism;ko05010//Alzheimer disease;ko04932//Non-alcoholic fatty liver disease (NAFLD);ko05012//Parkinson disease;ko00190//Oxidative phosphorylation;ko00020//Citrate cycle (TCA cycle)	K00235;K00235;K00235;K00235;K00235;K00235;K00235;K00235;K00235	-	-	-
ncbi_113812478	2	1.04423738642423e-318	6.21431273341743e-317	CCDC58	PREDICTED: coiled-coil domain-containing protein 58 [Nasonia vitripennis]	-	-	-	-	-	-	-
ncbi_113812602	2	0	0	ATPsynO	PREDICTED: ATP synthase subunit O, mitochondrial [Amyelois transitella]	Metabolism;Organismal Systems;Human Diseases;Human Diseases;Human Diseases;Metabolism	Global and overview maps;Environmental adaptation;Neurodegenerative diseases;Neurodegenerative diseases;Neurodegenerative diseases;Energy metabolism	ko01100//Metabolic pathways;ko04714//Thermogenesis;ko05016//Huntington disease;ko05010//Alzheimer disease;ko05012//Parkinson disease;ko00190//Oxidative phosphorylation	K02137;K02137;K02137;K02137;K02137;K02137	-	-	-
ncbi_113812683	4	5.53E-41	8.08E-40	--	PREDICTED: uncharacterized protein LOC108672531 isoform X1 [Hyalella azteca]	-	-	-	-	-	-	-
ncbi_113812695	5	1.35E-76	3.02E-75	SMC6	PREDICTED: structural maintenance of chromosomes protein 6-like [Hyalella azteca]	-	-	-	-	GO:0043229//intracellular organelle	-	-
ncbi_113812800	3	5.02E-66	1.02E-64	Fas2	PREDICTED: fasciclin-2-like isoform X1 [Hyalella azteca]	Environmental Information Processing;Human Diseases	Signaling molecules and interaction;Neurodegenerative diseases	ko04514//Cell adhesion molecules (CAMs);ko05020//Prion diseases	K06491;K06491	-	-	-
ncbi_113812981	4	6.23E-22	6.54E-21	Cfp1	PREDICTED: CXXC-type zinc finger protein 1 isoform X2 [Crassostrea gigas]	-	-	-	-	-	-	-
ncbi_113812936	4	1.25E-09	8.81E-09	SLC4A1AP	PREDICTED: kanadaptin-like [Hyalella azteca]	-	-	-	-	-	-	-
ncbi_113813107	2	1.53E-131	4.96E-130	--	-	-	-	-	-	-	-	-
ncbi_113813221	2	7.61E-10	5.41E-09	Rpap1	PREDICTED: RNA polymerase II-associated protein 1-like [Hyalella azteca]	-	-	-	-	-	-	-
ncbi_113813237	4	4.41E-76	9.79E-75	pen-2	presenilin enhancer 2 [Litopenaeus vannamei]	Human Diseases;Environmental Information Processing	Neurodegenerative diseases;Signal transduction	ko05010//Alzheimer disease;ko04330//Notch signaling pathway	K06170;K06170	-	-	-
ncbi_113813528	3	6.16E-117	1.83E-115	--	-	-	-	-	-	-	-	-
ncbi_113813522	4	2.36E-22	2.49E-21	GstD1	delta class glutathione S-transferase [Fenneropenaeus chinensis]	Human Diseases;Human Diseases;Human Diseases;Metabolism;Metabolism;Organismal Systems;Human Diseases;Human Diseases;Human Diseases;Metabolism;Metabolism	Cancers;Cancers;Cardiovascular diseases;Metabolism of other amino acids;Xenobiotics biodegradation and metabolism;Aging;Drug resistance;Cancers;Cancers;Xenobiotics biodegradation and metabolism;Xenobiotics biodegradation and metabolism	ko05200//Pathways in cancer;ko05225//Hepatocellular carcinoma;ko05418//Fluid shear stress and atherosclerosis;ko00480//Glutathione metabolism;ko00983//Drug metabolism - other enzymes;ko04212//Longevity regulating pathway - worm;ko01524//Platinum drug resistance;ko05215//Prostate cancer;ko05204//Chemical carcinogenesis;ko00980//Metabolism of xenobiotics by cytochrome P450;ko00982//Drug metabolism …	K00799;K00799;K00799;K00799;K00799;K00799;K00799;K00799;K00799;K00799;K00799	-	-	-
ncbi_113814125	4	7.94E-13	6.36E-12	FKBP4	FK506-binding protein 4 [Zootermopsis nevadensis]	Organismal Systems	Endocrine system	ko04915//Estrogen signaling pathway	K09571	-	-	-
ncbi_113814520	4	7.65E-16	6.78E-15	ACTL6B	PREDICTED: actin-like protein 6A [Hyalella azteca]	Organismal Systems;Human Diseases	Environmental adaptation;Cancers	ko04714//Thermogenesis;ko05225//Hepatocellular carcinoma	K11652;K11652	-	-	-
ncbi_113814652	4	1.09E-17	1.02E-16	ccnd2	PREDICTED: G1/S-specific cyclin-D2 isoform X1 [Megachile rotundata]	Human Diseases;Human Diseases;Cellular Processes;Environmental Information Processing;Environmental Information Processing;Human Diseases;Human Diseases;Human Diseases;Human Diseases;Cellular Processes;Environmental Information Processing;Environmental Information Processing;Cellular Processes;Human Diseases;Cellular Processes;Organismal Systems;Environmental Information Processing;Environmental …	Cancers;Infectious diseases;Cellular community - eukaryotes;Signal transduction;Signal transduction;Infectious diseases;Cancers;Cancers;Cancers;Cell growth and death;Signal transduction;Signal transduction;Cell growth and death;Infectious diseases;Cell growth and death;Endocrine system;Signal transduction;Signal transduction	ko05200//Pathways in cancer;ko05165//Human papillomavirus infection;ko04510//Focal adhesion;ko04151//PI3K-Akt signaling pathway;ko04390//Hippo signaling pathway;ko05166//HTLV-I infection;ko05202//Transcriptional misregulation in cancers;ko05206//MicroRNAs in cancer;ko05203//Viral carcinogenesis;ko04110//Cell cycle;ko04310//Wnt signaling pathway;ko04068//FoxO signaling pathway;ko04218//Cellular se…	K10151;K10151;K10151;K10151;K10151;K10151;K10151;K10151;K10151;K10151;K10151;K10151;K10151;K10151;K10151;K10151;K10151;K10151	GO:0043231//intracellular membrane-bounded organelle;GO:0044422//organelle part	-	GO:0007049//cell cycle;GO:0050794//regulation of cellular process
ncbi_113814703	2	9.08E-10	6.44E-09	SDR39U1	PREDICTED: epimerase family protein SDR39U1-like [Limulus polyphemus]	-	-	-	-	-	-	-
ncbi_113814714	2	1.73E-30	2.18E-29	ATPsyngamma	mitochondrial ATP synthase gamma subunit precursor [Litopenaeus vannamei]	Metabolism;Organismal Systems;Human Diseases;Human Diseases;Human Diseases;Metabolism	Global and overview maps;Environmental adaptation;Neurodegenerative diseases;Neurodegenerative diseases;Neurodegenerative diseases;Energy metabolism	ko01100//Metabolic pathways;ko04714//Thermogenesis;ko05016//Huntington disease;ko05010//Alzheimer disease;ko05012//Parkinson disease;ko00190//Oxidative phosphorylation	K02136;K02136;K02136;K02136;K02136;K02136	-	-	-
ncbi_113814890	2	0	0	RpS27A	ubiquitin [Procambarus clarkii]	Genetic Information Processing	Translation	ko03010//Ribosome	K02977	GO:0015935//small ribosomal subunit;GO:0031981//nuclear lumen;GO:0031988//membrane-bounded vesicle	GO:0003723//RNA binding;GO:0005198//structural molecule activity;GO:0043169//cation binding	GO:0000187//activation of MAPK activity;GO:0002224//toll-like receptor signaling pathway;GO:0006301//postreplication repair;GO:0010467//gene expression
ncbi_113814881	2	3.81E-26	4.40E-25	Nsa2	PREDICTED: ribosome biogenesis protein NSA2 homolog [Strongylocentrotus purpuratus]	-	-	-	-	-	-	-
ncbi_113815287	3	1.16E-10	8.51E-10	--	domeless [Litopenaeus vannamei]	-	-	-	-	-	-	-
ncbi_113814965	2	5.86E-225	2.74E-223	EIF2S2	PREDICTED: eukaryotic translation initiation factor 2 subunit 2-like [Hyalella azteca]	Genetic Information Processing	Translation	ko03013//RNA transport	K03238	-	-	-
ncbi_113814999	4	6.99E-09	4.77E-08	RANGAP1	PREDICTED: ran GTPase-activating protein 1-like [Hyalella azteca]	Genetic Information Processing	Translation	ko03013//RNA transport	K14319	-	-	-
ncbi_113815330	2	3.87E-32	5.00E-31	RRP36	PREDICTED: ribosomal RNA processing protein 36 homolog [Myotis davidii]	-	-	-	-	-	-	GO:0042254//ribosome biogenesis
ncbi_113815035	5	1.22E-185	4.99E-184	ITA	inhibitor of apoptosis protein [Litopenaeus vannamei]	Human Diseases;Cellular Processes;Cellular Processes;Environmental Information Processing;Genetic Information Processing;Human Diseases;Cellular Processes;Human Diseases;Human Diseases;Organismal Systems;Human Diseases;Environmental Information Processing;Cellular Processes;Organismal Systems;Environmental Information Processing	Cancers;Cellular community - eukaryotes;Cell growth and death;Signal transduction;Folding, sorting and degradation;Cancers;Cell growth and death;Drug resistance;Infectious diseases;Immune system;Cancers;Signal transduction;Cell growth and death;Immune system;Signal transduction	ko05200//Pathways in cancer;ko04510//Focal adhesion;ko04210//Apoptosis;ko04390//Hippo signaling pathway;ko04120//Ubiquitin mediated proteolysis;ko05202//Transcriptional misregulation in cancers;ko04217//Necroptosis;ko01524//Platinum drug resistance;ko05145//Toxoplasmosis;ko04621//NOD-like receptor signaling pathway;ko05222//Small cell lung cancer;ko04668//TNF signaling pathway;ko04215//Apoptosis …	K16060;K16060;K16060;K16060;K16060;K16060;K16060;K16060;K16060;K16060;K16060;K16060;K16060;K16060;K16060	-	-	-
ncbi_113815642	2	7.09E-24	7.78E-23	--	PREDICTED: uncharacterized protein LOC108674688 [Hyalella azteca]	-	-	-	-	-	-	-
ncbi_113815675	3	0	0	DBI	acyl-CoA-binding protein [Fenneropenaeus chinensis]	Organismal Systems	Endocrine system	ko03320//PPAR signaling pathway	K08762	GO:0031988//membrane-bounded vesicle;GO:0044432//endoplasmic reticulum part	GO:0000062//fatty-acyl-CoA binding;GO:0005515//protein binding	GO:0002209//behavioral defense response;GO:0006639//acylglycerol metabolic process;GO:0044708//single-organism behavior;GO:0046470//phosphatidylcholine metabolic process;GO:0048167//regulation of synaptic plasticity;GO:0048513//animal organ development
ncbi_113816183	3	7.53E-18	7.09E-17	--	C-type lectin 2 [Marsupenaeus japonicus]	-	-	-	-	-	-	-
ncbi_113816343	4	7.58E-09	5.16E-08	GTF3C5	General transcription factor 3C polypeptide 5 [Zootermopsis nevadensis]	-	-	-	-	GO:0090576//RNA polymerase III transcription factor complex	GO:0005488//binding	GO:0006383//transcription from RNA polymerase III promoter
ncbi_113816372	5	4.72E-50	7.89E-49	dda1	PREDICTED: DET1- and DDB1-associated protein 1 [Athalia rosae]	-	-	-	-	-	-	-
ncbi_113816434	3	7.86E-216	3.57E-214	CMPK	PREDICTED: UMP-CMP kinase-like [Hyalella azteca]	Metabolism;Metabolism;Metabolism	Global and overview maps;Xenobiotics biodegradation and metabolism;Nucleotide metabolism	ko01100//Metabolic pathways;ko00983//Drug metabolism - other enzymes;ko00240//Pyrimidine metabolism	K13800;K13800;K13800	-	-	-
ncbi_113816625	2	3.66E-22	3.85E-21	rnf170	PREDICTED: E3 ubiquitin-protein ligase RNF170-like [Hyalella azteca]	-	-	-	-	-	-	-
ncbi_113816797	2	5.61E-54	9.92E-53	Nob1	PREDICTED: RNA-binding protein NOB1 [Tribolium castaneum]	Genetic Information Processing	Translation	ko03008//Ribosome biogenesis in eukaryotes	K11883	-	-	-
ncbi_113816740	2	4.92E-105	1.36E-103	COPE	coatomer subunit epsilon [Fenneropenaeus chinensis]	-	-	-	-	-	-	-
ncbi_113816873	4	8.70E-26	9.98E-25	Zc3h14	PREDICTED: zinc finger CCCH domain-containing protein 14-like isoform X1 [Lingula anatina]	-	-	-	-	-	-	-
ncbi_113817072	2	2.65E-69	5.52E-68	MVK	PREDICTED: mevalonate kinase-like [Hyalella azteca]	Metabolism;Cellular Processes;Metabolism	Global and overview maps;Transport and catabolism;Metabolism of terpenoids and polyketides	ko01100//Metabolic pathways;ko04146//Peroxisome;ko00900//Terpenoid backbone biosynthesis	K00869;K00869;K00869	-	-	-
ncbi_113817160	2	9.60E-51	1.62E-49	URB1	Nucleolar pre-ribosomal-associated protein, partial [Daphnia magna]	-	-	-	-	-	-	-
ncbi_113817311	1	5.43E-14	4.54E-13	--	Selection and upkeep of intraepithelial T-cells protein 7, partial [Orchesella cincta]	-	-	-	-	-	-	-
ncbi_113817354	2	1.50E-16	1.36E-15	CRCP	PREDICTED: DNA-directed RNA polymerase III subunit RPC9-like isoform X2 [Priapulus caudatus]	-	-	-	-	-	-	GO:0044237//cellular metabolic process
ncbi_113817362	4	1.36E-26	1.59E-25	cops6	COP9 constitutive photomorphogenic-like protein subunit 6 [Penaeus monodon]	-	-	-	-	GO:0031988//membrane-bounded vesicle;GO:0043234//protein complex;GO:0044424//intracellular part	-	GO:0000338//protein deneddylation
ncbi_113817480	1	1.38E-08	9.23E-08	--	-	-	-	-	-	-	-	-
ncbi_113817495	3	3.38E-84	8.02E-83	chmp2a	Charged multivesicular body protein 2a [Orchesella cincta]	Cellular Processes;Cellular Processes	Transport and catabolism;Cell growth and death	ko04144//Endocytosis;ko04217//Necroptosis	K12191;K12191	-	-	-
ncbi_113817513	2	2.21E-56	4.01E-55	FAM206A	PREDICTED: protein Simiate-like [Crassostrea gigas]	-	-	-	-	-	-	-
ncbi_113817530	2	7.62E-20	7.55E-19	--	-	-	-	-	-	-	-	-
ncbi_113817562	4	4.03E-09	2.79E-08	Tmem214	PREDICTED: transmembrane protein 214-B-like [Lingula anatina]	-	-	-	-	-	-	-
ncbi_113817572	2	1.33E-58	2.48E-57	DHRS11	PREDICTED: dehydrogenase/reductase SDR family member 11-like isoform X2 [Lingula anatina]	-	-	-	-	-	-	-
ncbi_113817751	2	2.97E-256	1.53E-254	Uchl5	ubiquitin carboxyl-terminal hydrolase isozyme L5 [Scylla paramamosain]	-	-	-	-	GO:0044464//cell part	GO:0008238//exopeptidase activity	GO:0019941//modification-dependent protein catabolic process
ncbi_113817768	2	1.50E-28	1.82E-27	WDR74	WD repeat-containing protein, partial [Daphnia magna]	-	-	-	-	-	-	-
ncbi_113817779	2	4.74E-17	4.34E-16	PPP1R2	Protein phosphatase inhibitor 2 [Zootermopsis nevadensis]	-	-	-	-	-	-	-
ncbi_113818035	2	2.24E-27	2.65E-26	--	PREDICTED: serine-rich adhesin for platelets-like [Hyalella azteca]	-	-	-	-	-	-	-
ncbi_113818026	2	1.04E-53	1.84E-52	--	PREDICTED: serine-rich adhesin for platelets-like [Hyalella azteca]	-	-	-	-	-	-	-
ncbi_113818262	4	7.83E-18	7.37E-17	Cdk12	PREDICTED: cyclin-dependent kinase 12 isoform X2 [Linepithema humile]	-	-	-	-	-	-	-
ncbi_113818562	2	1.81E-09	1.27E-08	RPS2	PREDICTED: 40S ribosomal protein S2 [Lingula anatina]	Genetic Information Processing	Translation	ko03010//Ribosome	K02981	-	-	-
ncbi_113818569	2	0	0	--	-	-	-	-	-	-	-	-
ncbi_113818853	5	1.24E-17	1.16E-16	--	PREDICTED: gamma-soluble NSF attachment protein [Tribolium castaneum]	-	-	-	-	-	-	-
ncbi_113818896	2	1.47E-99	3.88E-98	PTRH2	PREDICTED: peptidyl-tRNA hydrolase 2, mitochondrial-like [Hyalella azteca]	-	-	-	-	GO:0044444//cytoplasmic part	-	GO:0008152//metabolic process;GO:0042981//regulation of apoptotic process;GO:0048519//negative regulation of biological process
ncbi_113818924	5	2.67E-10	1.94E-09	Ac76E	PREDICTED: adenylate cyclase type 2-like [Plutella xylostella]	Human Diseases;Organismal Systems;Environmental Information Processing;Human Diseases;Metabolism;Organismal Systems;Human Diseases;Organismal Systems;Organismal Systems;Organismal Systems;Environmental Information Processing;Organismal Systems;Environmental Information Processing;Human Diseases;Organismal Systems;Environmental Information Processing;Organismal Systems;Organismal Systems;Environme…	Cancers;Environmental adaptation;Signal transduction;Cardiovascular diseases;Nucleotide metabolism;Immune system;Infectious diseases;Endocrine system;Digestive system;Aging;Signal transduction;Circulatory system;Signal transduction;Endocrine and metabolic diseases;Digestive system;Signal transduction;Immune system;Nervous system;Signal transduction;Endocrine system;Infectious diseases;Cell growth…	ko05200//Pathways in cancer;ko04714//Thermogenesis;ko04015//Rap1 signaling pathway;ko05414//Dilated cardiomyopathy (DCM);ko00230//Purine metabolism;ko04611//Platelet activation;ko05166//HTLV-I infection;ko04921//Oxytocin signaling pathway;ko04972//Pancreatic secretion;ko04213//Longevity regulating pathway - multiple species;ko04022//cGMP - PKG signaling pathway;ko04261//Adrenergic signaling in ca…	K08042;K08042;K08042;K08042;K08042;K08042;K08042;K08042;K08042;K08042;K08042;K08042;K08042;K08042;K08042;K08042;K08042;K08042;K08042;K08042;K08042;K08042;K08042;K08042;K08042;K08042;K08042;K08042;K08042;K08042;K08042;K08042;K08042;K08042;K08042;K08042;K08042;K08042;K08042;K08042;K08042;K08042;K08042;K08042;K08042;K08042;K08042	-	-	-
ncbi_113819128	4	1.40E-42	2.09E-41	RAB8A	Ras-related protein Rab-8B [Daphnia magna]	Cellular Processes;Cellular Processes;Organismal Systems;Environmental Information Processing	Cellular community - eukaryotes;Transport and catabolism;Digestive system;Signal transduction	ko04530//Tight junction;ko04144//Endocytosis;ko04972//Pancreatic secretion;ko04152//AMPK signaling pathway	K07901;K07901;K07901;K07901	GO:0005798//Golgi-associated vesicle;GO:0005815//microtubule organizing center;GO:0010008//endosome membrane;GO:0030139//endocytic vesicle;GO:0072372//primary cilium	GO:0017022//myosin binding;GO:0032550//purine ribonucleoside binding	GO:0006906//vesicle fusion;GO:0008104//protein localization;GO:0010927//cellular component assembly involved in morphogenesis;GO:0035556//intracellular signal transduction;GO:0048278//vesicle docking
ncbi_113819099	2	1.48E-153	5.48E-152	DDX27	PREDICTED: probable ATP-dependent RNA helicase DDX27 [Trachymyrmex septentrionalis]	-	-	-	-	-	-	-
ncbi_113819157	4	1.36E-12	1.08E-11	pold2	PREDICTED: DNA polymerase delta subunit 2-like [Hyalella azteca]	Metabolism;Metabolism;Human Diseases;Metabolism;Genetic Information Processing;Genetic Information Processing;Genetic Information Processing;Genetic Information Processing;Genetic Information Processing	Global and overview maps;Nucleotide metabolism;Infectious diseases;Nucleotide metabolism;Replication and repair;Replication and repair;Replication and repair;Replication and repair;Replication and repair	ko01100//Metabolic pathways;ko00230//Purine metabolism;ko05166//HTLV-I infection;ko00240//Pyrimidine metabolism;ko03420//Nucleotide excision repair;ko03410//Base excision repair;ko03440//Homologous recombination;ko03030//DNA replication;ko03430//Mismatch repair	K02328;K02328;K02328;K02328;K02328;K02328;K02328;K02328;K02328	-	-	-
ncbi_113819369	4	4.42E-136	1.49E-134	Lsm2	PREDICTED: U6 snRNA-associated Sm-like protein LSm2 isoform X3 [Hyalella azteca]	Genetic Information Processing;Genetic Information Processing	Transcription;Folding, sorting and degradation	ko03040//Spliceosome;ko03018//RNA degradation	K12621;K12621	GO:0005681//spliceosomal complex;GO:0031981//nuclear lumen;GO:0044444//cytoplasmic part	GO:0017016//Ras GTPase binding;GO:0017069//snRNA binding;GO:0019900//kinase binding	GO:0000291//nuclear-transcribed mRNA catabolic process, exonucleolytic;GO:0000377//RNA splicing, via transesterification reactions with bulged adenosine as nucleophile
ncbi_113819728	2	4.47E-100	1.18E-98	--	-	-	-	-	-	-	-	-
ncbi_113819755	4	2.75E-41	4.04E-40	snRNP-U1-70K	PREDICTED: U1 small nuclear ribonucleoprotein 70 kDa-like [Hyalella azteca]	Genetic Information Processing	Transcription	ko03040//Spliceosome	K11093	-	-	-
ncbi_113819781	5	1.82E-63	3.60E-62	Klc	PREDICTED: kinesin light chain-like isoform X2 [Hyalella azteca]	Human Diseases	Infectious diseases	ko05132//Salmonella infection	K10407	-	-	-
ncbi_113819874	3	1.31E-15	1.15E-14	--	-	-	-	-	-	-	-	-
ncbi_113819905	3	2.10E-51	3.57E-50	CHST11	PREDICTED: carbohydrate sulfotransferase 11-like [Hyalella azteca]	Metabolism	Glycan biosynthesis and metabolism	ko00532//Glycosaminoglycan biosynthesis - chondroitin sulfate / dermatan sulfate	K01017	-	-	-
ncbi_113819916	3	2.95E-19	2.89E-18	chst14	PREDICTED: carbohydrate sulfotransferase 11-like [Hyalella azteca]	Metabolism	Glycan biosynthesis and metabolism	ko00532//Glycosaminoglycan biosynthesis - chondroitin sulfate / dermatan sulfate	K01017	-	-	-
ncbi_113820154	4	3.88E-14	3.27E-13	USP7	PREDICTED: ubiquitin carboxyl-terminal hydrolase 7-like [Hyalella azteca]	Human Diseases;Human Diseases;Environmental Information Processing;Human Diseases	Cancers;Infectious diseases;Signal transduction;Infectious diseases	ko05203//Viral carcinogenesis;ko05169//Epstein-Barr virus infection;ko04068//FoxO signaling pathway;ko05168//Herpes simplex infection	K11838;K11838;K11838;K11838	-	-	-
ncbi_113820354	2	7.71E-14	6.42E-13	--	Peptidyl-tRNA hydrolase PTRHD1 [Daphnia magna]	-	-	-	-	-	-	-
ncbi_113820465	3	5.70E-46	8.96E-45	--	PREDICTED: uncharacterized protein LOC108674604 [Hyalella azteca]	-	-	-	-	-	-	-
ncbi_113820482	2	1.66E-21	1.72E-20	MRPL38	39S ribosomal protein L38, mitochondrial [Zootermopsis nevadensis]	-	-	-	-	-	-	-
ncbi_113820489	4	4.59E-31	5.84E-30	Scaf8	PREDICTED: splicing factor, arginine/serine-rich 15-like isoform X1 [Hyalella azteca]	-	-	-	-	-	GO:0097159//organic cyclic compound binding	-
ncbi_113820552	2	4.09E-13	3.31E-12	NUDT5	PREDICTED: ADP-sugar pyrophosphatase-like [Limulus polyphemus]	Metabolism	Nucleotide metabolism	ko00230//Purine metabolism	K13987	-	GO:0016462//pyrophosphatase activity	-
ncbi_113820582	2	1.95E-179	7.90E-178	Dohh	PREDICTED: deoxyhypusine hydroxylase-like isoform X1 [Hyalella azteca]	-	-	-	-	-	GO:0016491//oxidoreductase activity	GO:0044710//single-organism metabolic process
ncbi_113820595	2	2.17E-45	3.37E-44	--	-	-	-	-	-	-	-	-
ncbi_113820602	2	1.69E-17	1.57E-16	rrp41	PREDICTED: exosome complex exonuclease RRP46 homolog [Hyalella azteca]	Genetic Information Processing	Folding, sorting and degradation	ko03018//RNA degradation	K12590	-	-	-
ncbi_113820661	4	2.19E-54	3.88E-53	Sxl	Sex-lethal [Eriocheir sinensis]	-	-	-	-	-	-	-
ncbi_113820943	2	7.50E-52	1.28E-50	utp15	PREDICTED: U3 small nucleolar RNA-associated protein 15 homolog [Cimex lectularius]	Genetic Information Processing	Translation	ko03008//Ribosome biogenesis in eukaryotes	K14549	-	-	-
ncbi_113820976	3	1.21E-26	1.41E-25	AGRN	PREDICTED: agrin-like [Hyalella azteca]	-	-	-	-	-	-	-
ncbi_113820948	5	5.53E-301	3.19E-299	--	-	-	-	-	-	-	-	-
ncbi_113821031	1	3.19E-104	8.78E-103	--	-	-	-	-	-	-	-	-
ncbi_113821272	5	4.40E-22	4.63E-21	hdc	Headcase protein-like protein, partial [Stegodyphus mimosarum]	-	-	-	-	-	-	-
ncbi_113821282	2	1.20E-16	1.09E-15	Usf1	PREDICTED: upstream stimulatory factor 2 isoform X2 [Larimichthys crocea]	-	-	-	-	-	-	-
ncbi_113821376	4	4.98E-48	8.07E-47	PRCC	PREDICTED: serine-rich adhesin for platelets-like isoform X1 [Hyalella azteca]	Human Diseases;Human Diseases	Cancers;Cancers	ko05202//Transcriptional misregulation in cancers;ko05211//Renal cell carcinoma	K13105;K13105	-	-	-
ncbi_113821338	5	1.88E-13	1.54E-12	--	CG1231 [Drosophila busckii]	-	-	-	-	-	-	-
ncbi_113821395	4	3.93E-09	2.72E-08	Scly	PREDICTED: selenocysteine lyase [Oryctolagus cuniculus]	Metabolism;Metabolism	Global and overview maps;Metabolism of other amino acids	ko01100//Metabolic pathways;ko00450//Selenocompound metabolism	K01763;K01763	-	GO:0003824//catalytic activity	GO:0043434//response to peptide hormone;GO:0044238//primary metabolic process;GO:0048523//negative regulation of cellular process
ncbi_113821413	2	1.38E-55	2.49E-54	PSMD2	PREDICTED: 26S proteasome non-ATPase regulatory subunit 2-like [Hyalella azteca]	Human Diseases;Genetic Information Processing	Infectious diseases;Folding, sorting and degradation	ko05169//Epstein-Barr virus infection;ko03050//Proteasome	K03028;K03028	-	-	-
ncbi_113821506	4	9.32E-10	6.60E-09	AGO1	argonaute 1 [Litopenaeus vannamei]	-	-	-	-	-	-	-
ncbi_113821600	2	1.25E-35	1.70E-34	CWC27	PREDICTED: peptidyl-prolyl cis-trans isomerase CWC27 homolog [Pogonomyrmex barbatus]	-	-	-	-	-	-	-
ncbi_113821609	4	1.52E-42	2.28E-41	--	-	-	-	-	-	-	-	-
ncbi_113821647	1	9.49E-39	1.34E-37	--	PREDICTED: uncharacterized protein LOC105190156 [Harpegnathos saltator]	-	-	-	-	-	-	-
ncbi_113821820	2	9.64E-09	6.52E-08	GBE1	1,4-alpha-glucan-branching enzyme [Daphnia magna]	Metabolism;Metabolism	Global and overview maps;Carbohydrate metabolism	ko01100//Metabolic pathways;ko00500//Starch and sucrose metabolism	K00700;K00700	-	-	-
ncbi_113821841	4	1.84E-09	1.29E-08	GlyS	PREDICTED: glycogen [starch] synthase [Amyelois transitella]	Metabolism;Environmental Information Processing;Organismal Systems;Environmental Information Processing;Human Diseases;Organismal Systems;Metabolism	Global and overview maps;Signal transduction;Endocrine system;Signal transduction;Endocrine and metabolic diseases;Endocrine system;Carbohydrate metabolism	ko01100//Metabolic pathways;ko04151//PI3K-Akt signaling pathway;ko04910//Insulin signaling pathway;ko04152//AMPK signaling pathway;ko04931//Insulin resistance;ko04922//Glucagon signaling pathway;ko00500//Starch and sucrose metabolism	K00693;K00693;K00693;K00693;K00693;K00693;K00693	-	-	-
ncbi_113821866	2	3.21E-60	6.12E-59	ARF4	ADP ribosylation factor 4 [Marsupenaeus japonicus]	-	-	-	-	-	-	-
ncbi_113821979	2	7.19E-13	5.77E-12	--	-	-	-	-	-	-	-	-
ncbi_113822132	1	7.57E-230	3.60E-228	--	PREDICTED: tyrosine-protein phosphatase Lar-like isoform X2 [Solenopsis invicta]	-	-	-	-	-	-	-
ncbi_113822166	5	8.76E-36	1.19E-34	SCD5	delta-9 acyl-CoA desaturase [Scylla paramamosain]	Environmental Information Processing;Organismal Systems;Organismal Systems;Metabolism;Metabolism	Signal transduction;Aging;Endocrine system;Global and overview maps;Lipid metabolism	ko04152//AMPK signaling pathway;ko04212//Longevity regulating pathway - worm;ko03320//PPAR signaling pathway;ko01212//Fatty acid metabolism;ko01040//Biosynthesis of unsaturated fatty acids	K00507;K00507;K00507;K00507;K00507	-	-	-
ncbi_113822282	1	7.43E-287	4.15E-285	PPAF3	prophenoloxidase activating enzyme 2 [Litopenaeus vannamei]	-	-	-	-	-	-	-
ncbi_113822289	1	1.99E-24	2.22E-23	--	-	-	-	-	-	-	-	-
ncbi_113822381	4	1.51E-34	2.02E-33	Ada2b	PREDICTED: transcriptional adapter 2B isoform X1 [Acromyrmex echinatior]	-	-	-	-	-	-	-
ncbi_113822456	4	6.41E-102	1.73E-100	--	-	-	-	-	-	-	-	-
ncbi_113822730	2	1.86E-151	6.76E-150	CG10417	PREDICTED: probable protein phosphatase 2C 21 [Anoplophora glabripennis]	-	-	-	-	-	GO:0004721//phosphoprotein phosphatase activity;GO:0043169//cation binding	GO:0006464//cellular protein modification process
ncbi_113822739	4	2.49E-19	2.44E-18	KDM5A	PREDICTED: lysine-specific demethylase lid isoform X1 [Ceratina calcarata]	-	-	-	-	-	-	-
ncbi_113822768	2	8.78E-82	2.04E-80	Clpp	PREDICTED: ATP-dependent Clp protease proteolytic subunit-like [Hyalella azteca]	Organismal Systems	Aging	ko04212//Longevity regulating pathway - worm	K01358	-	GO:0070011//peptidase activity, acting on L-amino acid peptides	GO:0019538//protein metabolic process
ncbi_113822791	2	2.09E-135	6.99E-134	ctp	PREDICTED: dynein light chain 2, cytoplasmic isoform X1 [Hyalella azteca]	Organismal Systems	Excretory system	ko04962//Vasopressin-regulated water reabsorption	K10418	GO:0030286//dynein complex;GO:0043231//intracellular membrane-bounded organelle	GO:0003774//motor activity;GO:0016887//ATPase activity;GO:0045502//dynein binding;GO:0046983//protein dimerization activity	GO:0006997//nucleus organization;GO:0007281//germ cell development;GO:0007423//sensory organ development;GO:0007444//imaginal disc development;GO:0009887//organ morphogenesis;GO:0022607//cellular component assembly;GO:0035114//imaginal disc-derived appendage morphogenesis;GO:0040001//establishment of mitotic spindle localization;GO:0044248//cellular catabolic process;GO:0048102//autophagic cell d…
ncbi_113822816	3	2.13E-28	2.58E-27	CYP9E2	PREDICTED: cytochrome P450 9e2-like isoform X1 [Hyalella azteca]	Metabolism;Human Diseases;Organismal Systems;Metabolism;Metabolism;Metabolism	Global and overview maps;Cancers;Digestive system;Metabolism of cofactors and vitamins;Lipid metabolism;Lipid metabolism	ko01100//Metabolic pathways;ko05204//Chemical carcinogenesis;ko04976//Bile secretion;ko00830//Retinol metabolism;ko00140//Steroid hormone biosynthesis;ko00591//Linoleic acid metabolism	K07424;K07424;K07424;K07424;K07424;K07424	-	-	-
ncbi_113822887	2	3.94E-20	3.94E-19	GA19395	PREDICTED: PITH domain-containing protein CG6153 [Bemisia tabaci]	-	-	-	-	-	-	-
ncbi_113822937	2	5.26E-228	2.48E-226	UQCRB	ubiquinol-cytochrome c reductase binding protein [Paracalanus parvus]	Metabolism;Organismal Systems;Human Diseases;Human Diseases;Human Diseases;Human Diseases;Metabolism;Organismal Systems	Global and overview maps;Environmental adaptation;Neurodegenerative diseases;Neurodegenerative diseases;Endocrine and metabolic diseases;Neurodegenerative diseases;Energy metabolism;Circulatory system	ko01100//Metabolic pathways;ko04714//Thermogenesis;ko05016//Huntington disease;ko05010//Alzheimer disease;ko04932//Non-alcoholic fatty liver disease (NAFLD);ko05012//Parkinson disease;ko00190//Oxidative phosphorylation;ko04260//Cardiac muscle contraction	K00417;K00417;K00417;K00417;K00417;K00417;K00417;K00417	GO:0019866//organelle inner membrane;GO:0044455//mitochondrial membrane part	-	GO:0022904//respiratory electron transport chain
ncbi_113822961	4	5.72E-13	4.61E-12	--	PREDICTED: neurofilament heavy polypeptide-like [Fopius arisanus]	-	-	-	-	-	-	-
ncbi_113822996	2	2.17E-45	3.37E-44	--	-	-	-	-	-	-	-	-
ncbi_113823391	5	2.05E-11	1.55E-10	--	PREDICTED: oocyte zinc finger protein XlCOF6-like isoform X1 [Cyprinodon variegatus]	-	-	-	-	-	-	-
ncbi_113823424	3	2.17E-94	5.55E-93	MKNK2	map kinase-interacting serine/threonine, partial [Scylla paramamosain]	Environmental Information Processing;Organismal Systems;Environmental Information Processing	Signal transduction;Endocrine system;Signal transduction	ko04010//MAPK signaling pathway;ko04910//Insulin signaling pathway;ko04066//HIF-1 signaling pathway	K04372;K04372;K04372	-	-	-
ncbi_113823430	2	0	0	RpL29	60S ribosomal protein L29 [Zootermopsis nevadensis]	Genetic Information Processing	Translation	ko03010//Ribosome	K02905	GO:0005622//intracellular	-	-
ncbi_113823445	5	1.07E-08	7.25E-08	med21	PREDICTED: mediator of RNA polymerase II transcription subunit 21-like [Hyalella azteca]	-	-	-	-	-	-	-
ncbi_113823500	3	0	0	--	-	-	-	-	-	-	-	-
ncbi_113823512	3	0	0	--	-	-	-	-	-	-	-	-
ncbi_113823524	3	0	0	--	-	-	-	-	-	-	-	-
ncbi_113823602	5	2.07E-31	2.65E-30	Khc	PREDICTED: kinesin heavy chain [Aedes albopictus]	Cellular Processes;Organismal Systems	Transport and catabolism;Nervous system	ko04144//Endocytosis;ko04728//Dopaminergic synapse	K10396;K10396	-	-	-
ncbi_113823825	2	4.74E-49	7.81E-48	NFYA	PREDICTED: nuclear transcription factor Y subunit alpha-like isoform X2 [Hyalella azteca]	Human Diseases;Organismal Systems	Infectious diseases;Immune system	ko05152//Tuberculosis;ko04612//Antigen processing and presentation	K08064;K08064	-	-	-
ncbi_113823817	3	3.38E-28	4.08E-27	--	-	-	-	-	-	-	-	-
ncbi_113823866	3	2.36E-116	6.96E-115	MEGF11	PREDICTED: multiple epidermal growth factor-like domains protein 11 [Hyalella azteca]	-	-	-	-	-	-	-
ncbi_113824081	2	0	0	RPL36	ribosomal protein L36 [Procambarus clarkii]	Genetic Information Processing	Translation	ko03010//Ribosome	K02920	GO:0030529//intracellular ribonucleoprotein complex	-	GO:0010467//gene expression
ncbi_113824188	3	2.78E-14	2.35E-13	WASF3	PREDICTED: wiskott-Aldrich syndrome protein family member 3 isoform X3 [Orussus abietinus]	-	-	-	-	-	-	-
ncbi_113824247	5	2.43E-27	2.88E-26	Cdc40	PREDICTED: pre-mRNA-processing factor 17-like [Hyalella azteca]	Genetic Information Processing	Transcription	ko03040//Spliceosome	K12816	-	GO:0016740//transferase activity	GO:0016570//histone modification
ncbi_113824259	2	8.26E-17	7.53E-16	RAB1A	organellar Rab protein [Litopenaeus vannamei]	Human Diseases	Infectious diseases	ko05134//Legionellosis	K07874	-	-	-
ncbi_113824302	2	1.97E-99	5.18E-98	SDAD1	PREDICTED: protein SDA1 homolog [Anoplophora glabripennis]	-	-	-	-	-	-	-
ncbi_113824316	2	2.23E-92	5.64E-91	DHRS4	PREDICTED: dehydrogenase/reductase SDR family member 4-like [Hyalella azteca]	Metabolism;Cellular Processes;Metabolism	Global and overview maps;Transport and catabolism;Metabolism of cofactors and vitamins	ko01100//Metabolic pathways;ko04146//Peroxisome;ko00830//Retinol metabolism	K11147;K11147;K11147	-	-	-
ncbi_113824343	2	1.02E-44	1.57E-43	--	M-phase phosphoprotein 6 protein [Penaeus monodon]	Genetic Information Processing	Folding, sorting and degradation	ko03018//RNA degradation	K12593	-	-	-
ncbi_113824404	2	2.40E-140	8.26E-139	CG12975	PREDICTED: multifunctional methyltransferase subunit TRM112-like protein [Hyalella azteca]	-	-	-	-	-	-	-
ncbi_113824415	2	3.07E-111	8.89E-110	--	-	-	-	-	-	-	-	-
ncbi_113824734	4	1.87E-15	1.64E-14	--	PREDICTED: uncharacterized protein C20orf24 homolog [Aethina tumida]	-	-	-	-	-	-	-
ncbi_113824935	4	1.05E-16	9.52E-16	--	PREDICTED: nuclear hormone receptor HR96-like isoform X3 [Biomphalaria glabrata]	Human Diseases;Organismal Systems;Organismal Systems;Organismal Systems	Infectious diseases;Endocrine system;Digestive system;Excretory system	ko05152//Tuberculosis;ko04928//Parathyroid hormone synthesis, secretion and action;ko04978//Mineral absorption;ko04961//Endocrine and other factor-regulated calcium reabsorption	K08539;K08539;K08539;K08539	-	-	-
ncbi_113824989	4	1.45E-13	1.19E-12	Dido1	PREDICTED: PHD finger protein 3-like isoform X1 [Hyalella azteca]	-	-	-	-	-	-	-
ncbi_113825095	1	1.08E-101	2.90E-100	CHAC1	PREDICTED: glutathione-specific gamma-glutamylcyclotransferase 1-like [Hyalella azteca]	Metabolism;Metabolism	Global and overview maps;Metabolism of other amino acids	ko01100//Metabolic pathways;ko00480//Glutathione metabolism	K07232;K07232	-	-	-
ncbi_113825439	2	2.03E-22	2.14E-21	--	PREDICTED: zinc finger protein 197-like isoform X2 [Bemisia tabaci]	-	-	-	-	-	-	-
ncbi_113825495	5	1.9021527364888e-321	1.13462175567442e-319	--	-	-	-	-	-	-	-	-
ncbi_113825702	4	2.02E-101	5.40E-100	NDUFA12	Probable NADH dehydrogenase 1 alpha subcomplex subunit 12 [Caligus rogercresseyi]	Metabolism;Organismal Systems;Human Diseases;Human Diseases;Human Diseases;Human Diseases;Metabolism;Organismal Systems	Global and overview maps;Environmental adaptation;Neurodegenerative diseases;Neurodegenerative diseases;Endocrine and metabolic diseases;Neurodegenerative diseases;Energy metabolism;Nervous system	ko01100//Metabolic pathways;ko04714//Thermogenesis;ko05016//Huntington disease;ko05010//Alzheimer disease;ko04932//Non-alcoholic fatty liver disease (NAFLD);ko05012//Parkinson disease;ko00190//Oxidative phosphorylation;ko04723//Retrograde endocannabinoid signaling	K11352;K11352;K11352;K11352;K11352;K11352;K11352;K11352	-	-	-
ncbi_113826050	3	1.16E-108	3.31E-107	thrb	thyroid hormone receptor beta [Haliotis diversicolor]	Organismal Systems;Environmental Information Processing	Endocrine system;Signaling molecules and interaction	ko04919//Thyroid hormone signaling pathway;ko04080//Neuroactive ligand-receptor interaction	K05547;K05547	-	-	-
ncbi_113826056	4	4.02E-30	5.02E-29	Atxn2	PREDICTED: ataxin-2-like protein [Dinoponera quadriceps]	-	-	-	-	-	-	-
ncbi_113826256	2	6.32E-26	7.28E-25	--	-	-	-	-	-	-	-	-
ncbi_113826280	5	2.05E-273	1.10E-271	Phldb2	Pleckstrin domain family B member 1 [Daphnia magna]	-	-	-	-	-	-	-
ncbi_113826328	2	1.89E-17	1.75E-16	UTP23	PREDICTED: rRNA-processing protein UTP23 homolog [Polistes dominula]	-	-	-	-	-	-	-
ncbi_113826679	2	1.39E-29	1.72E-28	Srp54	PREDICTED: signal recognition particle 54 kDa protein-like [Hyalella azteca]	Genetic Information Processing	Folding, sorting and degradation	ko03060//Protein export	K03106	-	-	-
ncbi_113826749	2	1.38E-169	5.41E-168	Aats-gln	PREDICTED: glutamine--tRNA ligase-like isoform X1 [Hyalella azteca]	Metabolism;Genetic Information Processing	Global and overview maps;Translation	ko01100//Metabolic pathways;ko00970//Aminoacyl-tRNA biosynthesis	K01886;K01886	-	GO:0004812//aminoacyl-tRNA ligase activity	GO:0006418//tRNA aminoacylation for protein translation
ncbi_113826796	5	2.11E-22	2.23E-21	--	PREDICTED: DNA polymerase V [Cephus cinctus]	-	-	-	-	-	-	-
ncbi_113826837	4	6.13E-19	5.94E-18	NFS1	cysteine desulfurase, mitochondrial isoform X1 [Microcebus murinus]	Metabolism;Metabolism;Genetic Information Processing	Global and overview maps;Metabolism of cofactors and vitamins;Folding, sorting and degradation	ko01100//Metabolic pathways;ko00730//Thiamine metabolism;ko04122//Sulfur relay system	K04487;K04487;K04487	GO:0044429//mitochondrial part	GO:0016783//sulfurtransferase activity;GO:0043168//anion binding;GO:0046983//protein dimerization activity	GO:0000096//sulfur amino acid metabolic process;GO:0016226//iron-sulfur cluster assembly
ncbi_113826853	2	8.45E-57	1.54E-55	VPS35	Vacuolar protein sorting-associated protein 35 [Zootermopsis nevadensis]	Cellular Processes	Transport and catabolism	ko04144//Endocytosis	K18468	-	-	-
ncbi_113827238	2	2.94E-26	3.40E-25	Fbxo22	PREDICTED: F-box only protein 22-like isoform X2 [Limulus polyphemus]	-	-	-	-	-	-	-
ncbi_113826878	2	2.73E-42	4.07E-41	--	PREDICTED: kinectin isoform X1 [Microplitis demolitor]	-	-	-	-	-	-	-
ncbi_113826886	2	5.86E-35	7.86E-34	RDH13	Retinol dehydrogenase, partial [Daphnia magna]	-	-	-	-	-	-	-
ncbi_113826913	2	3.79E-18	3.60E-17	--	-	-	-	-	-	-	-	-
ncbi_113826924	3	3.10E-12	2.44E-11	CaMKII	PREDICTED: calcium/calmodulin-dependent protein kinase II isoform X2 [Apis mellifera]	Human Diseases;Human Diseases;Organismal Systems;Organismal Systems;Organismal Systems;Environmental Information Processing;Cellular Processes;Human Diseases;Organismal Systems;Environmental Information Processing;Human Diseases;Environmental Information Processing;Organismal Systems;Cellular Processes;Organismal Systems;Environmental Information Processing;Organismal Systems;Organismal Systems;O…	Cancers;Cancers;Sensory system;Endocrine system;Circulatory system;Signal transduction;Cell growth and death;Endocrine and metabolic diseases;Digestive system;Signal transduction;Infectious diseases;Signal transduction;Development;Cell growth and death;Nervous system;Signal transduction;Nervous system;Sensory system;Nervous system;Endocrine system;Environmental adaptation;Endocrine system;Endocri…	ko05200//Pathways in cancer;ko05205//Proteoglycans in cancer;ko04745//Phototransduction - fly;ko04921//Oxytocin signaling pathway;ko04261//Adrenergic signaling in cardiomyocytes;ko04024//cAMP signaling pathway;ko04217//Necroptosis;ko04934//Cushing syndrome;ko04971//Gastric acid secretion;ko04310//Wnt signaling pathway;ko05152//Tuberculosis;ko04020//Calcium signaling pathway;ko04360//Axon guidance…	K04515;K04515;K04515;K04515;K04515;K04515;K04515;K04515;K04515;K04515;K04515;K04515;K04515;K04515;K04515;K04515;K04515;K04515;K04515;K04515;K04515;K04515;K04515;K04515;K04515;K04515;K04515;K04515;K04515;K04515	-	GO:0004672//protein kinase activity	-
ncbi_113826977	2	1.60E-41	2.37E-40	MRPS2	PREDICTED: 28S ribosomal protein S2, mitochondrial [Anoplophora glabripennis]	Genetic Information Processing	Translation	ko03010//Ribosome	K02967	-	-	-
ncbi_113827062	4	1.66E-19	1.63E-18	nr2c2ap	PREDICTED: nuclear receptor 2C2-associated protein-like [Hyalella azteca]	-	-	-	-	-	-	-
ncbi_113827395	2	7.01E-11	5.20E-10	CDC23	PREDICTED: cell division cycle protein 23 homolog isoform X1 [Limulus polyphemus]	Human Diseases;Genetic Information Processing;Cellular Processes;Cellular Processes;Organismal Systems	Infectious diseases;Folding, sorting and degradation;Cell growth and death;Cell growth and death;Endocrine system	ko05166//HTLV-I infection;ko04120//Ubiquitin mediated proteolysis;ko04110//Cell cycle;ko04114//Oocyte meiosis;ko04914//Progesterone-mediated oocyte maturation	K03355;K03355;K03355;K03355;K03355	-	-	GO:0007067//mitotic nuclear division;GO:0051301//cell division
ncbi_113827405	5	3.06E-234	1.49E-232	--	PREDICTED: thiosulfate sulfurtransferase/rhodanese-like domain-containing protein 3 isoform X1 [Hyalella azteca]	-	-	-	-	-	-	-
ncbi_113827590	4	1.16E-108	3.30E-107	tric-1B.1	PREDICTED: trimeric intracellular cation channel type B-like [Hyalella azteca]	-	-	-	-	-	-	-
ncbi_113827731	2	5.22E-22	5.49E-21	Hspa4l	heat shock protein [Cherax destructor]	Genetic Information Processing	Folding, sorting and degradation	ko04141//Protein processing in endoplasmic reticulum	K09485	-	-	-
ncbi_113827709	5	5.95E-84	1.41E-82	BTBD2	BTB/POZ domain-containing protein 2 [Zootermopsis nevadensis]	-	-	-	-	-	-	-
ncbi_113827724	2	2.20E-12	1.73E-11	--	-	-	-	-	-	-	-	-
ncbi_113827826	3	7.88E-93	1.99E-91	--	-	-	-	-	-	-	-	-
ncbi_113827925	2	7.41E-14	6.17E-13	taf8	PREDICTED: transcription initiation factor TFIID subunit 8-like [Hyalella azteca]	Genetic Information Processing	Transcription	ko03022//Basal transcription factors	K14649	-	-	-
ncbi_113828079	2	1.13E-17	1.06E-16	TMEM223	PREDICTED: transmembrane protein 223 [Nicrophorus vespilloides]	-	-	-	-	-	-	-
ncbi_113828134	2	1.41E-23	1.53E-22	PRKAB2	AMP-activated protein kinase subunit beta [Litopenaeus vannamei]	Organismal Systems;Cellular Processes;Human Diseases;Organismal Systems;Organismal Systems;Human Diseases;Organismal Systems;Environmental Information Processing;Environmental Information Processing;Human Diseases;Environmental Information Processing;Organismal Systems;Organismal Systems;Organismal Systems;Organismal Systems	Environmental adaptation;Cellular community - eukaryotes;Cardiovascular diseases;Endocrine system;Aging;Endocrine and metabolic diseases;Endocrine system;Signal transduction;Signal transduction;Endocrine and metabolic diseases;Signal transduction;Aging;Endocrine system;Endocrine system;Environmental adaptation	ko04714//Thermogenesis;ko04530//Tight junction;ko05410//Hypertrophic cardiomyopathy (HCM);ko04921//Oxytocin signaling pathway;ko04213//Longevity regulating pathway - multiple species;ko04932//Non-alcoholic fatty liver disease (NAFLD);ko04910//Insulin signaling pathway;ko04068//FoxO signaling pathway;ko04152//AMPK signaling pathway;ko04931//Insulin resistance;ko04371//Apelin signaling pathway;ko04…	K07199;K07199;K07199;K07199;K07199;K07199;K07199;K07199;K07199;K07199;K07199;K07199;K07199;K07199;K07199	-	-	-
ncbi_113828209	4	4.14E-14	3.48E-13	lola	Broad-complex protein isoform 4 [Penaeus monodon]	Cellular Processes;Organismal Systems	Cell growth and death;Development	ko04214//Apoptosis - fly;ko04320//Dorso-ventral axis formation	K02174;K02174	-	-	-
ncbi_113828326	1	7.60E-16	6.74E-15	--	-	-	-	-	-	-	-	-
ncbi_113828341	4	7.95E-21	8.07E-20	--	-	-	-	-	-	-	-	-
ncbi_113828361	2	9.31E-11	6.86E-10	rnf181	RING finger protein 181, partial [Cherax quadricarinatus]	-	-	-	-	-	-	-
ncbi_113828354	5	2.12E-10	1.54E-09	Polrmt	DNA-directed RNA polymerase, mitochondrial [Orchesella cincta]	-	-	-	-	-	-	-
ncbi_113828369	4	4.15E-41	6.07E-40	--	PREDICTED: LOW QUALITY PROTEIN: nuclear fragile X mental retardation-interacting protein 1 [Acromyrmex echinatior]	-	-	-	-	-	-	-
ncbi_113828374	2	2.26E-141	7.89E-140	Gapdh	glyceraldehyde-3-phosphate-dehydrogenase [Cherax cainii]	Metabolism;Metabolism;Human Diseases;Metabolism;Metabolism;Environmental Information Processing	Global and overview maps;Global and overview maps;Neurodegenerative diseases;Carbohydrate metabolism;Global and overview maps;Signal transduction	ko01100//Metabolic pathways;ko01200//Carbon metabolism;ko05010//Alzheimer disease;ko00010//Glycolysis / Gluconeogenesis;ko01230//Biosynthesis of amino acids;ko04066//HIF-1 signaling pathway	K00134;K00134;K00134;K00134;K00134;K00134	GO:0044424//intracellular part	GO:0000166//nucleotide binding;GO:0016620//oxidoreductase activity, acting on the aldehyde or oxo group of donors, NAD or NADP as acceptor	GO:0006090//pyruvate metabolic process;GO:0019318//hexose metabolic process
ncbi_113828570	1	1.12E-13	9.25E-13	--	PREDICTED: uncharacterized protein LOC106471123 [Limulus polyphemus]	-	-	-	-	-	-	-
ncbi_113828469	2	3.22E-10	2.32E-09	adat1	tRNA-specific adenosine deaminase 1 [Exaiptasia pallida]	-	-	-	-	-	-	-
ncbi_113828525	1	6.60E-11	4.90E-10	Plscr1	Phospholipid scramblase 2 [Zootermopsis nevadensis]	-	-	-	-	-	-	-
ncbi_113828634	2	5.72E-68	1.17E-66	--	PREDICTED: E3 ubiquitin-protein ligase TRIM32 [Python bivittatus]	Genetic Information Processing	Folding, sorting and degradation	ko04120//Ubiquitin mediated proteolysis	K10607	-	GO:0005488//binding	GO:0043170//macromolecule metabolic process;GO:0044238//primary metabolic process;GO:0044763//single-organism cellular process;GO:0048522//positive regulation of cellular process
ncbi_113828675	1	3.69E-15	3.21E-14	--	-	-	-	-	-	-	-	-
ncbi_113828690	1	0	0	--	-	-	-	-	-	-	-	-
ncbi_113828827	4	1.22E-58	2.27E-57	Arpc1a	PREDICTED: actin-related protein 2/3 complex subunit 1A-like isoform X2 [Hyalella azteca]	Cellular Processes;Cellular Processes;Human Diseases;Human Diseases;Human Diseases;Human Diseases;Organismal Systems	Cell motility;Transport and catabolism;Infectious diseases;Infectious diseases;Infectious diseases;Infectious diseases;Immune system	ko04810//Regulation of actin cytoskeleton;ko04144//Endocytosis;ko05130//Pathogenic Escherichia coli infection;ko05131//Shigellosis;ko05132//Salmonella infection;ko05100//Bacterial invasion of epithelial cells;ko04666//Fc gamma R-mediated phagocytosis	K05757;K05757;K05757;K05757;K05757;K05757;K05757	-	-	-
ncbi_113828821	2	2.31E-32	3.00E-31	--	PREDICTED: programmed cell death protein 7-like [Lingula anatina]	-	-	-	-	-	-	-
ncbi_113828837	4	3.84E-109	1.10E-107	Tbca	PREDICTED: tubulin-specific chaperone A-like [Hyalella azteca]	-	-	-	-	GO:0015630//microtubule cytoskeleton;GO:0031988//membrane-bounded vesicle	GO:0003723//RNA binding;GO:0005515//protein binding	GO:0043623//cellular protein complex assembly
ncbi_113828855	2	2.01E-09	1.40E-08	--	PREDICTED: HEAT repeat-containing protein 3 [Bombus impatiens]	-	-	-	-	-	-	-
ncbi_113828908	3	1.33E-165	5.13E-164	gnpda2	PREDICTED: glucosamine-6-phosphate isomerase 2-like isoform X2 [Hyalella azteca]	Metabolism;Metabolism	Global and overview maps;Carbohydrate metabolism	ko01100//Metabolic pathways;ko00520//Amino sugar and nucleotide sugar metabolism	K02564;K02564	GO:0044424//intracellular part	GO:0003824//catalytic activity	GO:0044238//primary metabolic process;GO:1901071//glucosamine-containing compound metabolic process
ncbi_113829084	4	4.92E-48	7.97E-47	Mgst3	Microsomal glutathione S-transferase, partial [Daphnia magna]	Human Diseases;Human Diseases;Human Diseases;Metabolism;Metabolism;Organismal Systems;Human Diseases;Human Diseases;Human Diseases;Metabolism;Metabolism	Cancers;Cancers;Cardiovascular diseases;Metabolism of other amino acids;Xenobiotics biodegradation and metabolism;Aging;Drug resistance;Cancers;Cancers;Xenobiotics biodegradation and metabolism;Xenobiotics biodegradation and metabolism	ko05200//Pathways in cancer;ko05225//Hepatocellular carcinoma;ko05418//Fluid shear stress and atherosclerosis;ko00480//Glutathione metabolism;ko00983//Drug metabolism - other enzymes;ko04212//Longevity regulating pathway - worm;ko01524//Platinum drug resistance;ko05215//Prostate cancer;ko05204//Chemical carcinogenesis;ko00980//Metabolism of xenobiotics by cytochrome P450;ko00982//Drug metabolism …	K00799;K00799;K00799;K00799;K00799;K00799;K00799;K00799;K00799;K00799;K00799	-	-	-
ncbi_113829358	2	1.66E-35	2.24E-34	mRpL13	PREDICTED: 39S ribosomal protein L13, mitochondrial [Dendroctonus ponderosae]	Genetic Information Processing	Translation	ko03010//Ribosome	K02871	GO:0030529//intracellular ribonucleoprotein complex	-	GO:0010467//gene expression
ncbi_113829112	2	1.87E-107	5.30E-106	Abce1	PREDICTED: ATP-binding cassette sub-family E member 1-like [Hyalella azteca]	-	-	-	-	-	GO:0017111//nucleoside-triphosphatase activity;GO:0032550//purine ribonucleoside binding;GO:0051540//metal cluster binding	-
ncbi_113829138	2	8.69E-97	2.25E-95	Mrpl43	Mitochondrial ribosomal protein L43 [Daphnia magna]	-	-	-	-	-	-	-
ncbi_113829176	3	3.97E-12	3.10E-11	--	myd88 protein [Artemia sinica]	-	-	-	-	-	-	-
ncbi_113829196	1	2.51E-11	1.90E-10	RHO	opsin [Neogonodactylus oerstedii]	-	-	-	-	-	-	-
ncbi_113829206	2	6.95E-125	2.17E-123	--	PREDICTED: ribonuclease H2 subunit C-like [Hyalella azteca]	Genetic Information Processing	Replication and repair	ko03030//DNA replication	K10745	-	-	-
ncbi_113829262	2	1.50E-28	1.82E-27	GSTM3	glutathione S-transferase [Penaeus monodon]	Human Diseases;Human Diseases;Human Diseases;Metabolism;Metabolism;Organismal Systems;Human Diseases;Human Diseases;Human Diseases;Metabolism;Metabolism	Cancers;Cancers;Cardiovascular diseases;Metabolism of other amino acids;Xenobiotics biodegradation and metabolism;Aging;Drug resistance;Cancers;Cancers;Xenobiotics biodegradation and metabolism;Xenobiotics biodegradation and metabolism	ko05200//Pathways in cancer;ko05225//Hepatocellular carcinoma;ko05418//Fluid shear stress and atherosclerosis;ko00480//Glutathione metabolism;ko00983//Drug metabolism - other enzymes;ko04212//Longevity regulating pathway - worm;ko01524//Platinum drug resistance;ko05215//Prostate cancer;ko05204//Chemical carcinogenesis;ko00980//Metabolism of xenobiotics by cytochrome P450;ko00982//Drug metabolism …	K00799;K00799;K00799;K00799;K00799;K00799;K00799;K00799;K00799;K00799;K00799	-	GO:0003824//catalytic activity	-
ncbi_113829390	4	6.48E-32	8.34E-31	emc7	PREDICTED: ER membrane protein complex subunit 7 homolog [Nicrophorus vespilloides]	-	-	-	-	-	-	-
ncbi_113829295	4	2.69E-23	2.91E-22	UBE2G2	ubiquitin-conjugating enzyme E2 G2 [Penaeus monodon]	Genetic Information Processing;Genetic Information Processing;Human Diseases	Folding, sorting and degradation;Folding, sorting and degradation;Neurodegenerative diseases	ko04141//Protein processing in endoplasmic reticulum;ko04120//Ubiquitin mediated proteolysis;ko05012//Parkinson disease	K04555;K04555;K04555	-	-	-
ncbi_113829286	2	1.29E-47	2.08E-46	Nsmce3	PREDICTED: non-structural maintenance of chromosomes element 3 homolog [Hyalella azteca]	-	-	-	-	-	-	-
ncbi_113829609	2	7.31E-10	5.21E-09	Farsa	PREDICTED: phenylalanine--tRNA ligase alpha subunit-like [Hyalella azteca]	Genetic Information Processing	Translation	ko00970//Aminoacyl-tRNA biosynthesis	K01889	-	GO:0003723//RNA binding;GO:0004812//aminoacyl-tRNA ligase activity;GO:0036094//small molecule binding	GO:0006418//tRNA aminoacylation for protein translation
ncbi_113829697	2	1.08E-19	1.06E-18	UBE2G2	ubiquitin-conjugating enzyme E2 G2 [Penaeus monodon]	Genetic Information Processing;Genetic Information Processing;Human Diseases	Folding, sorting and degradation;Folding, sorting and degradation;Neurodegenerative diseases	ko04141//Protein processing in endoplasmic reticulum;ko04120//Ubiquitin mediated proteolysis;ko05012//Parkinson disease	K04555;K04555;K04555	-	-	-
ncbi_113829726	2	1.68E-15	1.47E-14	--	-	-	-	-	-	-	-	-
ncbi_113829873	4	0	0	--	PREDICTED: RNA-binding protein 4.1-like isoform X3 [Parasteatoda tepidariorum]	-	-	-	-	-	-	-
ncbi_113829941	3	1.24E-90	3.07E-89	--	-	-	-	-	-	-	-	-
ncbi_113830551	2	2.09E-17	1.94E-16	--	PREDICTED: brain protein I3 [Tribolium castaneum]	-	-	-	-	-	-	-
ncbi_113799895	1	1.03E-14	8.84E-14	--	PREDICTED: glycine N-acyltransferase-like protein 3 isoform X2 [Cyprinodon variegatus]	-	-	-	-	-	-	-
ncbi_113799903	4	3.38E-60	6.44E-59	PPIL3	PREDICTED: peptidyl-prolyl cis-trans isomerase-like 3 [Neodiprion lecontei]	-	-	-	-	-	GO:0016859//cis-trans isomerase activity	GO:0044267//cellular protein metabolic process
ncbi_113800176	2	5.70E-244	2.84E-242	PNO1	RNA-binding protein pno1 [Daphnia magna]	-	-	-	-	GO:0043231//intracellular membrane-bounded organelle;GO:0043232//intracellular non-membrane-bounded organelle	GO:0003676//nucleic acid binding	-
ncbi_113800246	4	7.69E-09	5.23E-08	zgc:101577	hypothetical protein DAPPUDRAFT_198042 [Daphnia pulex]	-	-	-	-	-	-	-
ncbi_113800297	2	0	0	Serbp1	PREDICTED: plasminogen activator inhibitor 1 RNA-binding protein-like isoform X2 [Orussus abietinus]	-	-	-	-	-	-	-
ncbi_113800343	2	3.85E-57	7.07E-56	--	-	-	-	-	-	-	-	-
ncbi_113800382	2	0	0	EIF3F	PREDICTED: eukaryotic translation initiation factor 3 subunit F-1-like [Hyalella azteca]	Genetic Information Processing	Translation	ko03013//RNA transport	K03249	GO:0070993//translation preinitiation complex	-	GO:0006412//translation
ncbi_113800544	1	1.25E-08	8.44E-08	--	PREDICTED: G-protein coupled receptor Mth2-like [Hyalella azteca]	-	-	-	-	-	-	-
ncbi_113800869	3	3.85E-141	1.34E-139	--	-	-	-	-	-	-	-	-
ncbi_113800920	4	5.21E-09	3.57E-08	SART3	Squamous cell carcinoma antigen recognized by T-cells 3 [Zootermopsis nevadensis]	-	-	-	-	-	-	-
ncbi_113800932	2	2.68E-149	9.68E-148	MRPL4	39S ribosomal protein L4, mitochondrial [Zootermopsis nevadensis]	Genetic Information Processing	Translation	ko03010//Ribosome	K02926	-	-	-
ncbi_113800942	2	7.99E-47	1.27E-45	--	-	-	-	-	-	-	-	-
ncbi_113801045	1	2.51E-46	3.97E-45	ENPP1	PREDICTED: venom phosphodiesterase 2-like isoform X3 [Hyalella azteca]	Metabolism;Metabolism;Metabolism;Metabolism;Metabolism;Metabolism;Metabolism	Global and overview maps;Nucleotide metabolism;Nucleotide metabolism;Carbohydrate metabolism;Metabolism of cofactors and vitamins;Metabolism of cofactors and vitamins;Metabolism of cofactors and vitamins	ko01100//Metabolic pathways;ko00230//Purine metabolism;ko00240//Pyrimidine metabolism;ko00500//Starch and sucrose metabolism;ko00760//Nicotinate and nicotinamide metabolism;ko00770//Pantothenate and CoA biosynthesis;ko00740//Riboflavin metabolism	K01513;K01513;K01513;K01513;K01513;K01513;K01513	-	-	GO:0044237//cellular metabolic process;GO:0044763//single-organism cellular process;GO:0048519//negative regulation of biological process
ncbi_113801237	2	2.97E-21	3.05E-20	--	PREDICTED: charged multivesicular body protein 2b-like [Priapulus caudatus]	Cellular Processes;Cellular Processes	Transport and catabolism;Cell growth and death	ko04144//Endocytosis;ko04217//Necroptosis	K12192;K12192	-	-	-
ncbi_113801255	2	0	0	Psmd8	PREDICTED: 26S proteasome non-ATPase regulatory subunit 8-like [Hyalella azteca]	Human Diseases;Genetic Information Processing	Infectious diseases;Folding, sorting and degradation	ko05169//Epstein-Barr virus infection;ko03050//Proteasome	K03031;K03031	-	-	-
ncbi_113801883	2	7.09E-56	1.28E-54	--	-	-	-	-	-	-	-	-
ncbi_113801962	2	3.73E-278	2.02E-276	NUDC	PREDICTED: nuclear migration protein nudC [Macaca fascicularis]	-	-	-	-	-	-	-
ncbi_113801963	2	7.68E-89	1.88E-87	NCBP3	PREDICTED: nuclear cap-binding protein subunit 3-like [Neodiprion lecontei]	-	-	-	-	-	-	-
ncbi_113801961	5	4.33E-36	5.92E-35	Vps28	PREDICTED: vacuolar protein sorting-associated protein 28 homolog [Hyalella azteca]	Cellular Processes	Transport and catabolism	ko04144//Endocytosis	K12184	-	-	-
ncbi_113802005	2	6.82E-30	8.47E-29	cep19	PREDICTED: centrosomal protein of 19 kDa-like [Hyalella azteca]	-	-	-	-	GO:0005815//microtubule organizing center	-	-
ncbi_113802030	5	5.72E-40	8.24E-39	FBH1	PREDICTED: F-box DNA helicase 1 isoform X2 [Lepisosteus oculatus]	-	-	-	-	-	-	-
ncbi_113802091	2	1.53E-09	1.07E-08	dlst	PREDICTED: dihydrolipoyllysine-residue succinyltransferase component of 2-oxoglutarate dehydrogenase complex, mitochondrial [Acromyrmex echinatior]	Metabolism;Metabolism;Metabolism;Metabolism	Global and overview maps;Global and overview maps;Amino acid metabolism;Carbohydrate metabolism	ko01100//Metabolic pathways;ko01200//Carbon metabolism;ko00310//Lysine degradation;ko00020//Citrate cycle (TCA cycle)	K00658;K00658;K00658;K00658	-	GO:0016740//transferase activity	GO:0008152//metabolic process
ncbi_113802100	1	7.62E-66	1.54E-64	VMO1	vitelline membrane outer layer protein I-like protein [Pacifastacus leniusculus]	-	-	-	-	-	-	-
ncbi_113802107	2	0	0	--	Ubiquitin [Zootermopsis nevadensis]	Organismal Systems	Endocrine system	ko03320//PPAR signaling pathway	K08770	-	-	-
ncbi_113802117	2	0	0	Nop58	Nucleolar protein nop5 [Daphnia magna]	Genetic Information Processing	Translation	ko03008//Ribosome biogenesis in eukaryotes	K14565	-	-	-
ncbi_113802142	4	4.97E-44	7.60E-43	KdelR	PREDICTED: ER lumen protein-retaining receptor 2-like [Limulus polyphemus]	Human Diseases	Infectious diseases	ko05110//Vibrio cholerae infection	K10949	GO:0031224//intrinsic component of membrane;GO:0043231//intracellular membrane-bounded organelle	GO:0046923//ER retention sequence binding	GO:0035437//maintenance of protein localization in endoplasmic reticulum;GO:0048193//Golgi vesicle transport
ncbi_113802253	2	1.95E-16	1.76E-15	--	AAEL001298-PA [Aedes aegypti]	-	-	-	-	-	-	-
ncbi_113802303	2	0	0	Parcxpwex01	ribosomal protein S3a [Fenneropenaeus merguiensis]	Genetic Information Processing	Translation	ko03010//Ribosome	K02984	GO:0015935//small ribosomal subunit	-	GO:0010467//gene expression
ncbi_113802401	4	1.42E-14	1.21E-13	Dnajc8	DnaJ-like protein subfamily C member 8 [Zootermopsis nevadensis]	-	-	-	-	-	-	-
ncbi_113802390	2	2.31E-107	6.53E-106	uck2a	PREDICTED: uridine-cytidine kinase 2-like [Hyalella azteca]	Metabolism;Metabolism;Metabolism	Global and overview maps;Xenobiotics biodegradation and metabolism;Nucleotide metabolism	ko01100//Metabolic pathways;ko00983//Drug metabolism - other enzymes;ko00240//Pyrimidine metabolism	K00876;K00876;K00876	-	GO:0016772//transferase activity, transferring phosphorus-containing groups;GO:0032550//purine ribonucleoside binding	GO:0006796//phosphate-containing compound metabolic process
ncbi_113802507	2	1.22E-120	3.69E-119	GDI1	PREDICTED: rab GDP dissociation inhibitor alpha-like [Hyalella azteca]	-	-	-	-	-	-	-
ncbi_113802608	2	6.25E-20	6.22E-19	BRAFLDRAFT_270748	PREDICTED: glutamyl-tRNA(Gln) amidotransferase subunit C, mitochondrial [Astyanax mexicanus]	Metabolism;Genetic Information Processing	Global and overview maps;Translation	ko01100//Metabolic pathways;ko00970//Aminoacyl-tRNA biosynthesis	K02435;K02435	-	-	GO:0044238//primary metabolic process;GO:0044260//cellular macromolecule metabolic process
ncbi_113802697	2	1.38E-39	1.98E-38	Trmt6	PREDICTED: tRNA (adenine(58)-N(1))-methyltransferase non-catalytic subunit TRM6 [Scleropages formosus]	-	-	-	-	-	-	-
ncbi_113802729	2	1.41E-10	1.03E-09	Yars	PREDICTED: tyrosine--tRNA ligase, cytoplasmic-like [Hyalella azteca]	Genetic Information Processing	Translation	ko00970//Aminoacyl-tRNA biosynthesis	K01866	-	-	-
ncbi_113802885	2	2.09E-61	4.04E-60	psmc2	PREDICTED: 26S protease regulatory subunit 7 [Hyalella azteca]	Human Diseases;Genetic Information Processing	Infectious diseases;Folding, sorting and degradation	ko05169//Epstein-Barr virus infection;ko03050//Proteasome	K03061;K03061	GO:0044424//intracellular part	GO:0016787//hydrolase activity;GO:0032550//purine ribonucleoside binding	GO:0009057//macromolecule catabolic process;GO:0019538//protein metabolic process
ncbi_113802887	2	2.93E-279	1.59E-277	--	-	-	-	-	-	-	-	-
ncbi_113802901	3	3.57E-41	5.24E-40	--	-	-	-	-	-	-	-	-
ncbi_113802921	2	0	0	Clta	clathrin light chain [Cherax quadricarinatus]	Cellular Processes;Human Diseases;Cellular Processes;Human Diseases;Organismal Systems;Organismal Systems	Transport and catabolism;Neurodegenerative diseases;Transport and catabolism;Infectious diseases;Nervous system;Excretory system	ko04142//Lysosome;ko05016//Huntington disease;ko04144//Endocytosis;ko05100//Bacterial invasion of epithelial cells;ko04721//Synaptic vesicle cycle;ko04961//Endocrine and other factor-regulated calcium reabsorption	K04645;K04645;K04645;K04645;K04645;K04645	-	-	-
ncbi_113802922	1	2.62E-09	1.83E-08	enpp6	Ectonucleotide pyrophosphatase/phosphodiesterase family member [Daphnia magna]	Metabolism	Lipid metabolism	ko00565//Ether lipid metabolism	K08743	-	-	-
ncbi_113802925	3	2.50E-97	6.51E-96	--	Zinc-type alcohol dehydrogenase-like protein [Zootermopsis nevadensis]	-	-	-	-	-	-	-
ncbi_113802927	3	0	0	--	Zinc-type alcohol dehydrogenase-like protein [Zootermopsis nevadensis]	-	-	-	-	-	-	-
ncbi_113802932	4	8.68E-20	8.59E-19	--	PREDICTED: transcription factor A, mitochondrial [Microplitis demolitor]	Human Diseases;Environmental Information Processing	Neurodegenerative diseases;Signal transduction	ko05016//Huntington disease;ko04371//Apelin signaling pathway	K11830;K11830	GO:0043232//intracellular non-membrane-bounded organelle	-	-
ncbi_113802955	2	3.06E-32	3.96E-31	MNAT1	CDK-activating kinase assembly factor MAT1 [Penaeus monodon]	Genetic Information Processing;Genetic Information Processing	Replication and repair;Transcription	ko03420//Nucleotide excision repair;ko03022//Basal transcription factors	K10842;K10842	-	-	-
ncbi_113802970	4	2.13E-13	1.74E-12	JARID2	PREDICTED: protein Jumonji [Ceratina calcarata]	Cellular Processes	Cellular community - eukaryotes	ko04550//Signaling pathways regulating pluripotency of stem cells	K11478	-	-	-
ncbi_113802973	2	5.79E-78	1.30E-76	MRPL54	39S ribosomal protein L54, mitochondrial [Daphnia magna]	-	-	-	-	-	-	-
ncbi_113802993	2	1.28E-18	1.23E-17	--	-	-	-	-	-	-	-	-
ncbi_113803040	4	1.10E-18	1.06E-17	--	-	-	-	-	-	-	-	-
ncbi_113803030	4	1.56E-86	3.78E-85	caz	PREDICTED: RNA-binding protein cabeza-like isoform X2 [Hyalella azteca]	Human Diseases	Cancers	ko05202//Transcriptional misregulation in cancers	K13098	-	-	-
ncbi_113803034	4	9.93E-91	2.47E-89	--	-	-	-	-	-	-	-	-
ncbi_113803051	1	8.63E-20	8.54E-19	--	crustacean hematopoietic factor-like protein [Litopenaeus vannamei]	-	-	-	-	-	-	-
ncbi_113803064	2	1.69E-178	6.80E-177	NOC2L	Nucleolar complex protein [Daphnia magna]	-	-	-	-	-	-	-
ncbi_113803085	3	2.49E-18	2.37E-17	--	-	-	-	-	-	-	-	-
ncbi_113803087	4	5.39E-142	1.89E-140	Txn2	thioredoxin [Scylla paramamosain]	Human Diseases;Organismal Systems	Cardiovascular diseases;Immune system	ko05418//Fluid shear stress and atherosclerosis;ko04621//NOD-like receptor signaling pathway	K03671;K03671	-	GO:0015036//disulfide oxidoreductase activity	GO:0019725//cellular homeostasis;GO:0044710//single-organism metabolic process
ncbi_113803088	1	2.32E-56	4.21E-55	--	-	-	-	-	-	-	-	-
ncbi_113803092	2	0	0	CCT6	PREDICTED: T-complex protein 1 subunit zeta-like [Hyalella azteca]	-	-	-	-	GO:0044424//intracellular part	GO:0005515//protein binding;GO:0032550//purine ribonucleoside binding	GO:0044267//cellular protein metabolic process
ncbi_113803095	4	1.24E-12	9.86E-12	Fig4	PREDICTED: polyphosphoinositide phosphatase isoform X3 [Apis mellifera]	-	-	-	-	-	-	-
ncbi_113803098	2	5.94E-128	1.87E-126	--	PREDICTED: RRP15-like protein isoform X1 [Sinocyclocheilus anshuiensis]	-	-	-	-	-	-	-
ncbi_113803118	2	6.69E-64	1.33E-62	--	-	-	-	-	-	-	-	-
ncbi_113803123	1	3.22E-65	6.46E-64	PGD	PREDICTED: 6-phosphogluconate dehydrogenase, decarboxylating isoform X1 [Strongylocentrotus purpuratus]	Metabolism;Metabolism;Metabolism;Metabolism	Global and overview maps;Global and overview maps;Metabolism of other amino acids;Carbohydrate metabolism	ko01100//Metabolic pathways;ko01200//Carbon metabolism;ko00480//Glutathione metabolism;ko00030//Pentose phosphate pathway	K00033;K00033;K00033;K00033	-	-	-
ncbi_113803127	4	1.20E-42	1.80E-41	Tstd3	PREDICTED: 3-mercaptopyruvate sulfurtransferase-like [Hyalella azteca]	-	-	-	-	-	-	-
ncbi_113803161	2	5.61E-33	7.36E-32	--	-	-	-	-	-	-	-	-
ncbi_113803166	3	6.45E-69	1.34E-67	FAXDC2	PREDICTED: fatty acid hydroxylase domain-containing protein 2 [Microplitis demolitor]	-	-	-	-	-	-	-
ncbi_113803183	4	5.18E-41	7.57E-40	PRDX4	peroxiredoxin [Litopenaeus vannamei]	Cellular Processes	Cell growth and death	ko04214//Apoptosis - fly	K03386	-	GO:0003824//catalytic activity;GO:0016209//antioxidant activity	GO:0044710//single-organism metabolic process
ncbi_113803185	2	6.94E-54	1.22E-52	Vcp	valosin-containing protein [Penaeus monodon]	Genetic Information Processing;Human Diseases	Folding, sorting and degradation;Infectious diseases	ko04141//Protein processing in endoplasmic reticulum;ko05134//Legionellosis	K13525;K13525	-	GO:0003824//catalytic activity;GO:0032550//purine ribonucleoside binding	-
ncbi_113803186	2	2.43E-221	1.12E-219	nip7	PREDICTED: 60S ribosome subunit biogenesis protein NIP7 homolog [Hydra vulgaris]	-	-	-	-	GO:0043231//intracellular membrane-bounded organelle	GO:0003723//RNA binding	GO:0022618//ribonucleoprotein complex assembly
ncbi_113803199	5	9.92E-26	1.14E-24	--	male reproductive-related protein A [Macrobrachium rosenbergii]	-	-	-	-	-	-	-
ncbi_113803205	4	1.48E-56	2.69E-55	Emc8	COX4 neighbor protein, partial [Cherax quadricarinatus]	-	-	-	-	-	-	-
ncbi_113803241	2	2.33E-67	4.75E-66	glrx3	PREDICTED: glutaredoxin-3-like [Hyalella azteca]	-	-	-	-	GO:0031674//I band;GO:0031988//membrane-bounded vesicle	GO:0003723//RNA binding;GO:0015036//disulfide oxidoreductase activity	GO:0010611//regulation of cardiac muscle hypertrophy;GO:0019725//cellular homeostasis;GO:0044710//single-organism metabolic process
ncbi_113803254	4	4.67E-20	4.65E-19	lola	PREDICTED: longitudinals lacking protein, isoforms H/M/V-like isoform X3 [Hyalella azteca]	-	-	-	-	-	-	-
ncbi_113803266	2	0	0	NOP56	Nucleolar kke/d repeat protein [Daphnia magna]	Genetic Information Processing	Translation	ko03008//Ribosome biogenesis in eukaryotes	K14564	-	-	-
ncbi_113803285	1	3.33E-11	2.50E-10	--	-	-	-	-	-	-	-	-
ncbi_113803286	2	0	0	--	Sex-lethal [Eriocheir sinensis]	-	-	-	-	-	-	-
ncbi_113803289	1	8.06E-16	7.14E-15	SMIM14	PREDICTED: small integral membrane protein 14 [Haliaeetus leucocephalus]	-	-	-	-	-	-	-
ncbi_113803295	2	3.70E-75	8.15E-74	NDRG3	PREDICTED: protein NDRG3 isoform X2 [Tribolium castaneum]	-	-	-	-	-	-	-
ncbi_113803304	2	9.50E-12	7.31E-11	--	PREDICTED: uncharacterized protein LOC108675555 isoform X1 [Hyalella azteca]	-	-	-	-	-	-	-
ncbi_113803306	2	2.51E-14	2.13E-13	--	PREDICTED: probable RNA polymerase II nuclear localization protein SLC7A6OS [Octopus bimaculoides]	-	-	-	-	-	-	-
ncbi_113803328	4	1.00E-13	8.29E-13	--	-	-	-	-	-	-	-	-
ncbi_113803330	2	3.27E-48	5.31E-47	TRAPPC4	PREDICTED: trafficking protein particle complex subunit 4-like [Hyalella azteca]	-	-	-	-	-	-	-
ncbi_113803333	2	2.88E-14	2.44E-13	Idh3B	PREDICTED: probable isocitrate dehydrogenase [NAD] subunit beta, mitochondrial isoform X3 [Hyalella azteca]	Metabolism;Metabolism;Metabolism;Metabolism;Metabolism	Global and overview maps;Global and overview maps;Global and overview maps;Carbohydrate metabolism;Global and overview maps	ko01100//Metabolic pathways;ko01200//Carbon metabolism;ko01230//Biosynthesis of amino acids;ko00020//Citrate cycle (TCA cycle);ko01210//2-Oxocarboxylic acid metabolism	K00030;K00030;K00030;K00030;K00030	-	-	-
ncbi_113803340	1	4.46E-14	3.75E-13	MKL2	PREDICTED: MKL/myocardin-like protein 1 isoform X3 [Polistes canadensis]	-	-	-	-	-	-	-
ncbi_113803345	2	1.16E-304	6.74E-303	FKBP46	FKBP46 [Penaeus monodon]	-	-	-	-	-	GO:0016853//isomerase activity	-
ncbi_113803384	2	8.54E-16	7.55E-15	--	-	-	-	-	-	-	-	-
ncbi_113803387	2	3.53E-47	5.63E-46	--	PREDICTED: regulator of chromosome condensation-like [Hyalella azteca]	-	-	-	-	-	-	-
ncbi_113803397	3	1.74E-09	1.22E-08	Src64B	PREDICTED: tyrosine-protein kinase Src64B-like isoform X2 [Hyalella azteca]	Cellular Processes;Human Diseases;Cellular Processes;Cellular Processes;Organismal Systems;Cellular Processes;Environmental Information Processing;Organismal Systems;Environmental Information Processing;Cellular Processes;Organismal Systems;Human Diseases;Human Diseases;Human Diseases;Human Diseases;Human Diseases;Organismal Systems;Organismal Systems;Human Diseases;Organismal Systems;Cellular Pr…	Cellular community - eukaryotes;Cancers;Cell motility;Cellular community - eukaryotes;Endocrine system;Transport and catabolism;Signal transduction;Immune system;Signal transduction;Cellular community - eukaryotes;Endocrine system;Cardiovascular diseases;Infectious diseases;Infectious diseases;Cancers;Infectious diseases;Immune system;Endocrine system;Infectious diseases;Development;Cellular comm…	ko04510//Focal adhesion;ko05205//Proteoglycans in cancer;ko04810//Regulation of actin cytoskeleton;ko04530//Tight junction;ko04919//Thyroid hormone signaling pathway;ko04144//Endocytosis;ko04015//Rap1 signaling pathway;ko04611//Platelet activation;ko04013//MAPK signaling pathway - fly;ko04520//Adherens junction;ko04921//Oxytocin signaling pathway;ko05418//Fluid shear stress and atherosclerosis;ko…	K05704;K05704;K05704;K05704;K05704;K05704;K05704;K05704;K05704;K05704;K05704;K05704;K05704;K05704;K05704;K05704;K05704;K05704;K05704;K05704;K05704;K05704;K05704;K05704;K05704;K05704;K05704;K05704;K05704;K05704;K05704;K05704;K05704;K05704;K05704;K05704	-	-	-
ncbi_113803399	3	6.73E-53	1.17E-51	--	-	-	-	-	-	-	-	-
ncbi_113803403	2	6.42E-21	6.52E-20	LSM4	PREDICTED: U6 snRNA-associated Sm-like protein LSm4 [Poecilia formosa]	Genetic Information Processing;Genetic Information Processing	Transcription;Folding, sorting and degradation	ko03040//Spliceosome;ko03018//RNA degradation	K12623;K12623	-	-	-
ncbi_113803422	2	3.10E-12	2.44E-11	fru	Broad-complex protein isoform 6 variant 2 [Penaeus monodon]	-	-	-	-	-	-	-
ncbi_113803425	2	1.13E-132	3.69E-131	Ndufs2	PREDICTED: NADH-ubiquinone oxidoreductase 49 kDa subunit [Bactrocera dorsalis]	Metabolism;Organismal Systems;Human Diseases;Human Diseases;Human Diseases;Human Diseases;Metabolism;Organismal Systems	Global and overview maps;Environmental adaptation;Neurodegenerative diseases;Neurodegenerative diseases;Endocrine and metabolic diseases;Neurodegenerative diseases;Energy metabolism;Nervous system	ko01100//Metabolic pathways;ko04714//Thermogenesis;ko05016//Huntington disease;ko05010//Alzheimer disease;ko04932//Non-alcoholic fatty liver disease (NAFLD);ko05012//Parkinson disease;ko00190//Oxidative phosphorylation;ko04723//Retrograde endocannabinoid signaling	K03935;K03935;K03935;K03935;K03935;K03935;K03935;K03935	-	GO:0000166//nucleotide binding;GO:0016491//oxidoreductase activity;GO:0048037//cofactor binding	GO:0044710//single-organism metabolic process
ncbi_113803426	3	1.11E-76	2.47E-75	RAB8B	PREDICTED: ras-related protein Rab-8B-like isoform X1 [Cyprinus carpio]	Cellular Processes	Cellular community - eukaryotes	ko04530//Tight junction	K07902	-	-	-
ncbi_113803427	4	4.65E-30	5.80E-29	CG40228	PREDICTED: transcription elongation factor 1 homolog [Diaphorina citri]	-	-	-	-	-	-	-
ncbi_113803431	2	4.72E-40	6.80E-39	Polr2d	PREDICTED: DNA-directed RNA polymerase II 16 kDa polypeptide-like [Hyalella azteca]	Metabolism;Human Diseases;Metabolism;Human Diseases;Metabolism;Genetic Information Processing	Global and overview maps;Neurodegenerative diseases;Nucleotide metabolism;Infectious diseases;Nucleotide metabolism;Transcription	ko01100//Metabolic pathways;ko05016//Huntington disease;ko00230//Purine metabolism;ko05169//Epstein-Barr virus infection;ko00240//Pyrimidine metabolism;ko03020//RNA polymerase	K03012;K03012;K03012;K03012;K03012;K03012	GO:0044451//nucleoplasm part	GO:0034062//RNA polymerase activity;GO:0097159//organic cyclic compound binding	GO:0006351//transcription, DNA-templated
ncbi_113803433	2	0	0	NDUFB3	NADH dehydrogenase [Palaemon varians]	Metabolism;Organismal Systems;Human Diseases;Human Diseases;Human Diseases;Human Diseases;Metabolism;Organismal Systems	Global and overview maps;Environmental adaptation;Neurodegenerative diseases;Neurodegenerative diseases;Endocrine and metabolic diseases;Neurodegenerative diseases;Energy metabolism;Nervous system	ko01100//Metabolic pathways;ko04714//Thermogenesis;ko05016//Huntington disease;ko05010//Alzheimer disease;ko04932//Non-alcoholic fatty liver disease (NAFLD);ko05012//Parkinson disease;ko00190//Oxidative phosphorylation;ko04723//Retrograde endocannabinoid signaling	K03959;K03959;K03959;K03959;K03959;K03959;K03959;K03959	-	-	-
ncbi_113803439	2	1.06E-91	2.67E-90	EEF1E1	eukaryotic translation elongation factor 1 epsilon 1, partial [Scylla paramamosain]	-	-	-	-	-	-	GO:0009987//cellular process
ncbi_113803440	4	2.10E-155	7.86E-154	GILT1	gamma-interferon induced thiol reductase GILT2 [Scylla paramamosain]	-	-	-	-	-	-	-
ncbi_113803452	2	7.47E-20	7.40E-19	adal	PREDICTED: adenosine deaminase-like protein isoform X2 [Lingula anatina]	-	-	-	-	-	-	-
ncbi_113803456	4	2.69E-32	3.49E-31	--	PREDICTED: PRELI domain-containing protein 2-like [Limulus polyphemus]	-	-	-	-	-	-	-
ncbi_113803468	2	1.43E-86	3.47E-85	mtap	PREDICTED: S-methyl-5'-thioadenosine phosphorylase isoform X3 [Xenopus tropicalis]	Metabolism;Metabolism	Global and overview maps;Amino acid metabolism	ko01100//Metabolic pathways;ko00270//Cysteine and methionine metabolism	K00772;K00772	-	-	-
ncbi_113803489	3	8.75E-15	7.52E-14	VhaSFD	vacuolar-H-ATPase H [Cherax quadricarinatus]	Metabolism;Human Diseases;Cellular Processes;Cellular Processes;Environmental Information Processing;Human Diseases;Metabolism;Human Diseases;Human Diseases;Organismal Systems;Human Diseases	Global and overview maps;Infectious diseases;Transport and catabolism;Transport and catabolism;Signal transduction;Infectious diseases;Energy metabolism;Infectious diseases;Infectious diseases;Nervous system;Immune diseases	ko01100//Metabolic pathways;ko05165//Human papillomavirus infection;ko04145//Phagosome;ko04142//Lysosome;ko04150//mTOR signaling pathway;ko05110//Vibrio cholerae infection;ko00190//Oxidative phosphorylation;ko05152//Tuberculosis;ko05120//Epithelial cell signaling in Helicobacter pylori infection;ko04721//Synaptic vesicle cycle;ko05323//Rheumatoid arthritis	K02144;K02144;K02144;K02144;K02144;K02144;K02144;K02144;K02144;K02144;K02144	-	GO:0015078//hydrogen ion transmembrane transporter activity	GO:0015988//energy coupled proton transmembrane transport, against electrochemical gradient
ncbi_113803496	3	1.08E-69	2.27E-68	--	-	-	-	-	-	-	-	-
ncbi_113803502	3	0	0	--	-	-	-	-	-	-	-	-
ncbi_113803500	1	4.00E-43	6.03E-42	--	-	-	-	-	-	-	-	-
ncbi_113803501	3	1.22E-36	1.67E-35	--	-	-	-	-	-	-	-	-
ncbi_113803524	1	2.70E-17	2.49E-16	--	-	-	-	-	-	-	-	-
ncbi_113803503	2	6.83E-135	2.27E-133	pit	AAEL005744-PA [Aedes aegypti]	-	-	-	-	-	-	-
ncbi_113803504	2	6.84E-129	2.17E-127	pit	PREDICTED: probable ATP-dependent RNA helicase pitchoune [Polistes canadensis]	-	-	-	-	-	GO:0003676//nucleic acid binding;GO:0016787//hydrolase activity	-
ncbi_113803507	2	8.75E-14	7.27E-13	--	-	-	-	-	-	-	-	-
ncbi_113803506	3	4.80E-222	2.23E-220	Chia	chitinase 1C [Macrobrachium nipponense]	Metabolism;Metabolism	Global and overview maps;Carbohydrate metabolism	ko01100//Metabolic pathways;ko00520//Amino sugar and nucleotide sugar metabolism	K01183;K01183	-	-	GO:0008152//metabolic process
ncbi_113803509	2	8.90E-213	3.99E-211	--	PREDICTED: NADH dehydrogenase [ubiquinone] 1 alpha subcomplex subunit 11 [Bactrocera cucurbitae]	Metabolism;Organismal Systems;Human Diseases;Human Diseases;Human Diseases;Human Diseases;Metabolism;Organismal Systems	Global and overview maps;Environmental adaptation;Neurodegenerative diseases;Neurodegenerative diseases;Endocrine and metabolic diseases;Neurodegenerative diseases;Energy metabolism;Nervous system	ko01100//Metabolic pathways;ko04714//Thermogenesis;ko05016//Huntington disease;ko05010//Alzheimer disease;ko04932//Non-alcoholic fatty liver disease (NAFLD);ko05012//Parkinson disease;ko00190//Oxidative phosphorylation;ko04723//Retrograde endocannabinoid signaling	K03956;K03956;K03956;K03956;K03956;K03956;K03956;K03956	-	-	-
ncbi_113803529	2	0	0	Rpt6	PREDICTED: 26S protease regulatory subunit 8 [Hyalella azteca]	Human Diseases;Genetic Information Processing	Infectious diseases;Folding, sorting and degradation	ko05169//Epstein-Barr virus infection;ko03050//Proteasome	K03066;K03066	GO:0044424//intracellular part	GO:0016462//pyrophosphatase activity;GO:0032550//purine ribonucleoside binding	GO:0009057//macromolecule catabolic process
ncbi_113803512	5	3.46E-87	8.44E-86	RAB35	PREDICTED: ras-related protein Rab-35 [Agrilus planipennis]	Cellular Processes	Transport and catabolism	ko04144//Endocytosis	K07876	-	GO:0004620//phospholipase activity;GO:0016790//thiolester hydrolase activity;GO:0032550//purine ribonucleoside binding	GO:0008104//protein localization;GO:0035556//intracellular signal transduction
ncbi_113803517	4	1.35E-135	4.52E-134	daf-41	P23 [Litopenaeus vannamei]	Metabolism;Metabolism	Global and overview maps;Lipid metabolism	ko01100//Metabolic pathways;ko00590//Arachidonic acid metabolism	K15730;K15730	-	-	-
ncbi_113803520	4	7.32E-70	1.54E-68	KRTCAP2	keratinocyte associated protein 2 [Litopenaeus vannamei]	-	-	-	-	-	-	-
ncbi_113803523	2	4.25E-100	1.12E-98	PARK7	DJ-1 protein [Litopenaeus vannamei]	Human Diseases	Neurodegenerative diseases	ko05012//Parkinson disease	K05687	-	-	-
ncbi_113803542	5	9.22E-11	6.79E-10	Npdc1	Neural proliferation differentiation and control protein 1-like protein [Tribolium castaneum]	-	-	-	-	-	-	-
ncbi_113803554	4	5.09E-11	3.80E-10	--	-	-	-	-	-	-	-	-
ncbi_113803556	2	1.38E-30	1.75E-29	--	39S ribosomal protein L10, mitochondrial [Zootermopsis nevadensis]	Genetic Information Processing	Translation	ko03010//Ribosome	K02864	-	-	-
ncbi_113803557	2	1.58E-13	1.30E-12	--	-	-	-	-	-	-	-	-
ncbi_113803553	3	3.11E-13	2.53E-12	ClC-a	PREDICTED: chloride channel protein 2 isoform X3 [Drosophila rhopaloa]	Organismal Systems	Digestive system	ko04978//Mineral absorption	K05011	-	-	GO:0006811//ion transport
ncbi_113803559	1	2.11E-74	4.61E-73	ClC-a	PREDICTED: chloride channel protein 2-like isoform X4 [Hyalella azteca]	Organismal Systems	Digestive system	ko04978//Mineral absorption	K05011	-	-	-
ncbi_113803561	2	0	0	sqd	PREDICTED: RNA-binding protein squid-like isoform X6 [Hyalella azteca]	Organismal Systems	Development	ko04320//Dorso-ventral axis formation	K03102	-	-	-
ncbi_113803568	5	3.57E-122	1.09E-120	Ptp4a1	PREDICTED: protein tyrosine phosphatase type IVA 1 [Orussus abietinus]	-	-	-	-	-	GO:0004721//phosphoprotein phosphatase activity	GO:0006796//phosphate-containing compound metabolic process
ncbi_113803583	3	8.11E-14	6.74E-13	--	PREDICTED: myotubularin-related protein DDB_G0290005-like isoform X4 [Hyalella azteca]	-	-	-	-	-	-	-
ncbi_113803584	5	1.02E-17	9.62E-17	UBC	PREDICTED: polyubiquitin isoform X2 [Chlamydotis macqueenii]	Organismal Systems	Endocrine system	ko03320//PPAR signaling pathway	K08770	GO:0005774//vacuolar membrane;GO:0030659//cytoplasmic vesicle membrane;GO:0031981//nuclear lumen	GO:0003723//RNA binding;GO:0019899//enzyme binding	GO:0000087//mitotic M phase;GO:0001666//response to hypoxia;GO:0001818//negative regulation of cytokine production;GO:0001819//positive regulation of cytokine production;GO:0002220//innate immune response activating cell surface receptor signaling pathway;GO:0002753//cytoplasmic pattern recognition receptor signaling pathway;GO:0002756//MyD88-independent toll-like receptor signaling pathway;GO:00…
ncbi_113803586	3	1.22E-281	6.73E-280	--	-	-	-	-	-	-	-	-
ncbi_113803606	2	4.78E-29	5.84E-28	Eif4e2	eukaryotic initiation factor elF4E like protein, partial [Marsupenaeus japonicus]	Environmental Information Processing;Genetic Information Processing;Environmental Information Processing;Organismal Systems;Environmental Information Processing;Organismal Systems;Human Diseases	Signal transduction;Translation;Signal transduction;Endocrine system;Signal transduction;Aging;Drug resistance	ko04151//PI3K-Akt signaling pathway;ko03013//RNA transport;ko04150//mTOR signaling pathway;ko04910//Insulin signaling pathway;ko04066//HIF-1 signaling pathway;ko04211//Longevity regulating pathway - mammal;ko01521//EGFR tyrosine kinase inhibitor resistance	K03259;K03259;K03259;K03259;K03259;K03259;K03259	-	-	-
ncbi_113803611	2	1.12E-50	1.88E-49	SAFB2	PREDICTED: SAFB-like transcription modulator isoform X1 [Musca domestica]	-	-	-	-	-	-	-
ncbi_113803628	2	0	0	SmD3	small nuclear ribonucleoprotein SM D3 (snRNP core protein D3) (SM-D3)-like protein, partial [Scylla paramamosain]	Genetic Information Processing;Human Diseases	Transcription;Immune diseases	ko03040//Spliceosome;ko05322//Systemic lupus erythematosus	K11088;K11088	-	-	-
ncbi_113803626	4	9.64E-41	1.40E-39	MEAF6	PREDICTED: chromatin modification-related protein MEAF6-like [Limulus polyphemus]	-	-	-	-	-	-	-
ncbi_113803637	5	5.59E-09	3.82E-08	--	-	-	-	-	-	-	-	-
ncbi_113803640	5	2.81E-50	4.70E-49	lamtor3	MAPK kinase 1 interacting protein 1 [Penaeus monodon]	Environmental Information Processing;Environmental Information Processing	Signal transduction;Signal transduction	ko04150//mTOR signaling pathway;ko04010//MAPK signaling pathway	K04370;K04370	GO:0016020//membrane;GO:0043234//protein complex	GO:0005515//protein binding	GO:0008104//protein localization;GO:0032006//regulation of TOR signaling;GO:0043087//regulation of GTPase activity;GO:0043200//response to amino acid
ncbi_113803641	2	8.05E-152	2.94E-150	vps25	PREDICTED: vacuolar protein-sorting-associated protein 25-like [Hyalella azteca]	Cellular Processes	Transport and catabolism	ko04144//Endocytosis	K12189	-	-	-
ncbi_113803667	3	2.10E-128	6.64E-127	serpinb1	serine proteinase inhibitor [Litopenaeus vannamei]	Human Diseases	Infectious diseases	ko05146//Amoebiasis	K13963	-	-	-
ncbi_113803687	5	2.55E-24	2.83E-23	CanB2	PREDICTED: calcineurin subunit B type 2 isoform X3 [Hyalella azteca]	Human Diseases;Organismal Systems;Environmental Information Processing;Human Diseases;Environmental Information Processing;Environmental Information Processing;Human Diseases;Environmental Information Processing;Cellular Processes;Human Diseases;Organismal Systems;Cellular Processes;Organismal Systems;Human Diseases;Organismal Systems;Organismal Systems;Organismal Systems;Organismal Systems;Human…	Infectious diseases;Endocrine system;Signal transduction;Neurodegenerative diseases;Signal transduction;Signal transduction;Infectious diseases;Signal transduction;Cell growth and death;Infectious diseases;Development;Cell growth and death;Nervous system;Infectious diseases;Endocrine system;Endocrine system;Nervous system;Immune system;Substance dependence;Immune system;Neurodegenerative diseases…	ko05166//HTLV-I infection;ko04921//Oxytocin signaling pathway;ko04010//MAPK signaling pathway;ko05010//Alzheimer disease;ko04022//cGMP - PKG signaling pathway;ko04310//Wnt signaling pathway;ko05152//Tuberculosis;ko04020//Calcium signaling pathway;ko04218//Cellular senescence;ko05163//Human cytomegalovirus infection;ko04360//Axon guidance;ko04114//Oocyte meiosis;ko04724//Glutamatergic synapse;ko05…	K06268;K06268;K06268;K06268;K06268;K06268;K06268;K06268;K06268;K06268;K06268;K06268;K06268;K06268;K06268;K06268;K06268;K06268;K06268;K06268;K06268;K06268;K06268;K06268;K06268;K06268;K06268	-	-	-
ncbi_113803689	2	8.10E-280	4.40E-278	--	PREDICTED: poly [ADP-ribose] polymerase 3-like [Sinocyclocheilus rhinocerous]	Cellular Processes;Cellular Processes;Cellular Processes;Organismal Systems;Genetic Information Processing;Environmental Information Processing	Cell growth and death;Cell growth and death;Cell growth and death;Aging;Replication and repair;Signal transduction	ko04210//Apoptosis;ko04217//Necroptosis;ko04214//Apoptosis - fly;ko04212//Longevity regulating pathway - worm;ko03410//Base excision repair;ko04064//NF-kappa B signaling pathway	K10798;K10798;K10798;K10798;K10798;K10798	-	-	-
ncbi_113803690	2	2.41E-197	1.03E-195	pin4	Peptidyl-prolyl cis-trans isomerase NIMA-interacting 4 [Crassostrea gigas]	-	-	-	-	-	-	-
ncbi_113803692	4	2.01E-12	1.59E-11	slc16a12b	PREDICTED: monocarboxylate transporter 12-B-like isoform X2 [Hyalella azteca]	-	-	-	-	-	-	-
ncbi_113803693	5	1.20E-220	5.53E-219	--	PREDICTED: tripartite motif-containing protein 65-like [Hyalella azteca]	-	-	-	-	-	-	GO:0002376//immune system process;GO:0048513//animal organ development;GO:0065007//biological regulation
ncbi_113803698	2	1.13E-53	1.98E-52	PSMD9	PREDICTED: 26S proteasome non-ATPase regulatory subunit 9 [Neodiprion lecontei]	-	-	-	-	-	-	-
ncbi_113803706	3	5.08E-10	3.65E-09	--	-	-	-	-	-	-	-	-
ncbi_113803707	3	5.01E-18	4.73E-17	--	transcription factor ATF-b [Litopenaeus vannamei]	-	-	-	-	-	-	-
ncbi_113803725	3	3.81E-12	2.98E-11	STX4	PREDICTED: syntaxin-1A-like [Hyalella azteca]	Organismal Systems;Organismal Systems;Human Diseases;Genetic Information Processing	Endocrine system;Nervous system;Substance dependence;Folding, sorting and degradation	ko04911//Insulin secretion;ko04721//Synaptic vesicle cycle;ko05031//Amphetamine addiction;ko04130//SNARE interactions in vesicular transport	K04560;K04560;K04560;K04560	-	-	-
ncbi_113803729	2	8.92E-86	2.15E-84	AAEL005041	PREDICTED: ribosome biogenesis protein WDR12 homolog [Nasonia vitripennis]	-	-	-	-	-	-	-
ncbi_113803749	3	1.01E-09	7.13E-09	--	PREDICTED: NACHT, LRR and PYD domains-containing protein 3-like [Strongylocentrotus purpuratus]	-	-	-	-	-	-	-
ncbi_113803754	2	6.96E-220	3.18E-218	NDUFB11	PREDICTED: NADH dehydrogenase [ubiquinone] 1 beta subcomplex subunit 11, mitochondrial [Ceratosolen solmsi marchali]	Metabolism;Organismal Systems;Human Diseases;Human Diseases;Human Diseases;Human Diseases;Metabolism;Organismal Systems	Global and overview maps;Environmental adaptation;Neurodegenerative diseases;Neurodegenerative diseases;Endocrine and metabolic diseases;Neurodegenerative diseases;Energy metabolism;Nervous system	ko01100//Metabolic pathways;ko04714//Thermogenesis;ko05016//Huntington disease;ko05010//Alzheimer disease;ko04932//Non-alcoholic fatty liver disease (NAFLD);ko05012//Parkinson disease;ko00190//Oxidative phosphorylation;ko04723//Retrograde endocannabinoid signaling	K11351;K11351;K11351;K11351;K11351;K11351;K11351;K11351	-	-	-
ncbi_113803755	2	0	0	RPL15	60S Ribosomal Protein L15 [Pantala flavescens]	Genetic Information Processing	Translation	ko03010//Ribosome	K02877	-	-	-
ncbi_113803758	2	3.89E-63	7.65E-62	Iscu	PREDICTED: iron-sulfur cluster assembly enzyme ISCU, mitochondrial-like [Hyalella azteca]	-	-	-	-	-	-	-
ncbi_113803760	2	1.10E-25	1.26E-24	v1g229988	PREDICTED: cytosolic Fe-S cluster assembly factor NUBP2 homolog [Hyalella azteca]	-	-	-	-	-	-	-
ncbi_113803764	2	1.58E-63	3.12E-62	MRPS21	PREDICTED: 28S ribosomal protein S21, mitochondrial [Athalia rosae]	Genetic Information Processing	Translation	ko03010//Ribosome	K02970	GO:0000314//organellar small ribosomal subunit	-	GO:0010467//gene expression
ncbi_113803769	3	4.05E-20	4.05E-19	CASK	PREDICTED: peripheral plasma membrane protein CASK isoform X4 [Cephus cinctus]	-	-	-	-	-	-	-
ncbi_113803773	2	1.62E-184	6.63E-183	Non3	Brix domain-containing protein 1 [Zootermopsis nevadensis]	-	-	-	-	-	-	-
ncbi_113803774	2	1.77E-129	5.65E-128	Vars	PREDICTED: valine--tRNA ligase isoform X1 [Neodiprion lecontei]	Genetic Information Processing	Translation	ko00970//Aminoacyl-tRNA biosynthesis	K01873	-	GO:0004812//aminoacyl-tRNA ligase activity	GO:0006418//tRNA aminoacylation for protein translation
ncbi_113803783	3	0	0	--	-	-	-	-	-	-	-	-
ncbi_113803780	3	9.90E-09	6.69E-08	Wdr6	WD repeat-containing protein 6, partial [Ophiophagus hannah]	-	-	-	-	-	-	-
ncbi_113803782	4	5.87E-14	4.91E-13	POLE4	PREDICTED: DNA polymerase epsilon subunit 4-like [Hyalella azteca]	Metabolism;Metabolism;Human Diseases;Metabolism;Genetic Information Processing;Genetic Information Processing;Genetic Information Processing	Global and overview maps;Nucleotide metabolism;Infectious diseases;Nucleotide metabolism;Replication and repair;Replication and repair;Replication and repair	ko01100//Metabolic pathways;ko00230//Purine metabolism;ko05166//HTLV-I infection;ko00240//Pyrimidine metabolism;ko03420//Nucleotide excision repair;ko03410//Base excision repair;ko03030//DNA replication	K03506;K03506;K03506;K03506;K03506;K03506;K03506	-	-	-
ncbi_113803790	2	6.45E-14	5.38E-13	PREB	PREDICTED: prolactin regulatory element-binding protein-like [Hyalella azteca]	Genetic Information Processing	Folding, sorting and degradation	ko04141//Protein processing in endoplasmic reticulum	K14003	-	-	-
ncbi_113803801	4	9.60E-46	1.50E-44	MMADHC	Methylmalonic aciduria and homocystinuria type D [Daphnia magna]	-	-	-	-	-	-	-
ncbi_113803802	4	7.31E-20	7.25E-19	TSTA3	PREDICTED: GDP-L-fucose synthase isoform X1 [Nanorana parkeri]	Metabolism;Metabolism;Metabolism	Global and overview maps;Carbohydrate metabolism;Carbohydrate metabolism	ko01100//Metabolic pathways;ko00520//Amino sugar and nucleotide sugar metabolism;ko00051//Fructose and mannose metabolism	K02377;K02377;K02377	-	GO:0016616//oxidoreductase activity, acting on the CH-OH group of donors, NAD or NADP as acceptor;GO:0048037//cofactor binding	GO:0042350//GDP-L-fucose biosynthetic process
ncbi_113803831	3	1.23E-153	4.55E-152	ANGPT1	PREDICTED: techylectin-5A-like [Hyalella azteca]	Environmental Information Processing;Environmental Information Processing;Environmental Information Processing;Environmental Information Processing;Environmental Information Processing;Human Diseases	Signal transduction;Signal transduction;Signal transduction;Signal transduction;Signal transduction;Immune diseases	ko04151//PI3K-Akt signaling pathway;ko04015//Rap1 signaling pathway;ko04010//MAPK signaling pathway;ko04014//Ras signaling pathway;ko04066//HIF-1 signaling pathway;ko05323//Rheumatoid arthritis	K05465;K05465;K05465;K05465;K05465;K05465	-	-	GO:0001932//regulation of protein phosphorylation;GO:0007166//cell surface receptor signaling pathway;GO:0007275//multicellular organism development;GO:0031401//positive regulation of protein modification process;GO:0032879//regulation of localization;GO:0042327//positive regulation of phosphorylation;GO:0048523//negative regulation of cellular process;GO:0048856//anatomical structure development…
ncbi_113803844	2	5.01E-28	6.01E-27	Htatsf1	PREDICTED: HIV Tat-specific factor 1 homolog [Hyalella azteca]	-	-	-	-	-	-	-
ncbi_113803845	3	5.55E-57	1.01E-55	--	C-type lectin domain family 2 member D [Daphnia magna]	-	-	-	-	-	-	-
ncbi_113803873	1	0	0	--	Kazal-type proteinase inhibitor [Litopenaeus vannamei]	-	-	-	-	-	-	-
ncbi_113803875	1	7.60E-229	3.60E-227	--	hemocyte kazal-type proteinase inhibitor [Penaeus monodon]	-	-	-	-	-	-	-
ncbi_113803882	3	5.26E-18	4.97E-17	ogfod2	PREDICTED: 2-oxoglutarate and iron-dependent oxygenase domain-containing protein 2-like [Lingula anatina]	-	-	-	-	-	GO:0016491//oxidoreductase activity	-
ncbi_113803885	3	2.75E-24	3.05E-23	GBETA1	G protein beta 1 subunit [Litopenaeus vannamei]	Human Diseases;Environmental Information Processing;Human Diseases;Environmental Information Processing;Organismal Systems;Organismal Systems;Organismal Systems;Human Diseases;Organismal Systems;Organismal Systems;Organismal Systems;Organismal Systems;Environmental Information Processing;Organismal Systems;Human Diseases;Organismal Systems;Human Diseases;Organismal Systems;Organismal Systems	Cancers;Signal transduction;Substance dependence;Signal transduction;Immune system;Nervous system;Endocrine system;Infectious diseases;Nervous system;Nervous system;Nervous system;Nervous system;Signal transduction;Nervous system;Infectious diseases;Environmental adaptation;Substance dependence;Sensory system;Sensory system	ko05200//Pathways in cancer;ko04151//PI3K-Akt signaling pathway;ko05034//Alcoholism;ko04014//Ras signaling pathway;ko04062//Chemokine signaling pathway;ko04723//Retrograde endocannabinoid signaling;ko04926//Relaxin signaling pathway;ko05163//Human cytomegalovirus infection;ko04726//Serotonergic synapse;ko04724//Glutamatergic synapse;ko04725//Cholinergic synapse;ko04728//Dopaminergic synapse;ko043…	K04536;K04536;K04536;K04536;K04536;K04536;K04536;K04536;K04536;K04536;K04536;K04536;K04536;K04536;K04536;K04536;K04536;K04536;K04536	-	-	-
ncbi_113803886	2	7.87E-09	5.35E-08	--	hypothetical protein L798_02590 [Zootermopsis nevadensis]	-	-	-	-	-	-	-
ncbi_113803894	3	1.49E-194	6.33E-193	Gs2	glutamine synthetase [Penaeus monodon]	Metabolism;Cellular Processes;Metabolism;Organismal Systems;Organismal Systems;Metabolism;Metabolism;Metabolism;Metabolism	Global and overview maps;Cell growth and death;Global and overview maps;Nervous system;Nervous system;Carbohydrate metabolism;Amino acid metabolism;Amino acid metabolism;Energy metabolism	ko01100//Metabolic pathways;ko04217//Necroptosis;ko01230//Biosynthesis of amino acids;ko04724//Glutamatergic synapse;ko04727//GABAergic synapse;ko00630//Glyoxylate and dicarboxylate metabolism;ko00250//Alanine, aspartate and glutamate metabolism;ko00220//Arginine biosynthesis;ko00910//Nitrogen metabolism	K01915;K01915;K01915;K01915;K01915;K01915;K01915;K01915;K01915	-	-	-
ncbi_113803906	2	8.89E-72	1.90E-70	DARS	PREDICTED: aspartate--tRNA ligase, cytoplasmic [Camponotus floridanus]	Genetic Information Processing	Translation	ko00970//Aminoacyl-tRNA biosynthesis	K22503	-	-	-
ncbi_113803921	2	1.60E-205	7.08E-204	snf	PREDICTED: U1 small nuclear ribonucleoprotein A [Ceratina calcarata]	-	-	-	-	-	GO:0003676//nucleic acid binding	-
ncbi_113803922	3	2.17E-27	2.58E-26	--	Nucleic acid-binding, OB-fold-like containing protein [Cricetulus griseus]	-	-	-	-	GO:0005694//chromosome	GO:0008169//C-methyltransferase activity;GO:0008171//O-methyltransferase activity;GO:0008276//protein methyltransferase activity;GO:0008649//rRNA methyltransferase activity;GO:0016273//arginine N-methyltransferase activity;GO:0016423//tRNA (guanine) methyltransferase activity;GO:0016426//tRNA (adenine) methyltransferase activity;GO:0016427//tRNA (cytosine) methyltransferase activity	-
ncbi_113803966	1	1.91E-21	1.98E-20	--	-	-	-	-	-	-	-	-
ncbi_113803961	1	1.65E-13	1.36E-12	--	-	-	-	-	-	-	-	-
ncbi_113803971	2	2.71E-22	2.86E-21	--	PREDICTED: uncharacterized lyase C29B12.13-like [Hyalella azteca]	-	-	-	-	-	-	-
ncbi_113803987	4	8.23E-145	2.91E-143	pnt	PREDICTED: protein c-ets-1-A-like [Agrilus planipennis]	Human Diseases;Environmental Information Processing;Human Diseases;Environmental Information Processing;Cellular Processes;Organismal Systems;Human Diseases	Cancers;Signal transduction;Infectious diseases;Signal transduction;Cell growth and death;Development;Cancers	ko05200//Pathways in cancer;ko04013//MAPK signaling pathway - fly;ko05166//HTLV-I infection;ko04014//Ras signaling pathway;ko04218//Cellular senescence;ko04320//Dorso-ventral axis formation;ko05211//Renal cell carcinoma	K02678;K02678;K02678;K02678;K02678;K02678;K02678	-	-	-
ncbi_113804004	2	8.68E-22	9.06E-21	Rngtt	PREDICTED: mRNA-capping enzyme-like [Hyalella azteca]	Genetic Information Processing	Translation	ko03015//mRNA surveillance pathway	K13917	-	-	-
ncbi_113803998	3	5.85E-134	1.93E-132	FCN1	fibrinogen-related protein 2 [Litopenaeus vannamei]	-	-	-	-	-	-	-
ncbi_113804007	2	2.22E-11	1.68E-10	Lars	PREDICTED: leucine--tRNA ligase, cytoplasmic-like [Hyalella azteca]	Genetic Information Processing	Translation	ko00970//Aminoacyl-tRNA biosynthesis	K01869	GO:0044424//intracellular part	GO:0004812//aminoacyl-tRNA ligase activity	GO:0006418//tRNA aminoacylation for protein translation
ncbi_113804013	1	7.23E-09	4.92E-08	--	C2 domain-containing protein [Naegleria gruberi]	-	-	-	-	-	-	-
ncbi_113804035	5	3.02E-27	3.56E-26	KEAP1	Kelch-like ECH-associated protein 1 [Zootermopsis nevadensis]	Human Diseases;Human Diseases;Genetic Information Processing;Human Diseases	Cancers;Cancers;Folding, sorting and degradation;Cardiovascular diseases	ko05200//Pathways in cancer;ko05225//Hepatocellular carcinoma;ko04120//Ubiquitin mediated proteolysis;ko05418//Fluid shear stress and atherosclerosis	K10456;K10456;K10456;K10456	-	-	-
ncbi_113804039	2	5.58E-122	1.71E-120	ube2ib	ubiquitin-conjugating enzyme E2 c [Litopenaeus vannamei]	Genetic Information Processing;Genetic Information Processing;Human Diseases;Environmental Information Processing	Translation;Folding, sorting and degradation;Cancers;Signal transduction	ko03013//RNA transport;ko04120//Ubiquitin mediated proteolysis;ko05206//MicroRNAs in cancer;ko04064//NF-kappa B signaling pathway	K10577;K10577;K10577;K10577	-	GO:0019787//ubiquitin-like protein transferase activity	-
ncbi_113804045	2	1.21E-132	3.93E-131	Chchd2	coiled-coil-helix-coiled-coil-helix domain-containing protein 2, mitochondrial-like protein [Danaus plexippus]	-	-	-	-	-	-	-
ncbi_113804048	2	5.22E-62	1.02E-60	exosc6	PREDICTED: exosome complex component MTR3-like [Hyalella azteca]	Genetic Information Processing	Folding, sorting and degradation	ko03018//RNA degradation	K12587	-	-	-
ncbi_113804060	2	6.36E-15	5.48E-14	Tgs1	Trimethylguanosine synthase [Crassostrea gigas]	Genetic Information Processing	Translation	ko03013//RNA transport	K14292	-	-	-
ncbi_113804062	4	4.89E-73	1.06E-71	CANX	calnexin [Penaeus monodon]	Genetic Information Processing;Cellular Processes;Human Diseases;Organismal Systems;Organismal Systems	Folding, sorting and degradation;Transport and catabolism;Infectious diseases;Endocrine system;Immune system	ko04141//Protein processing in endoplasmic reticulum;ko04145//Phagosome;ko05166//HTLV-I infection;ko04918//Thyroid hormone synthesis;ko04612//Antigen processing and presentation	K08054;K08054;K08054;K08054;K08054	-	-	-
ncbi_113804087	3	1.02E-32	1.33E-31	--	-	-	-	-	-	-	-	-
ncbi_113804089	4	8.82E-22	9.19E-21	CXorf56	PREDICTED: UPF0428 protein CXorf56 homolog [Megachile rotundata]	-	-	-	-	-	-	-
ncbi_113804113	4	2.94E-09	2.05E-08	--	PREDICTED: myb-like protein I isoform X2 [Harpegnathos saltator]	-	-	-	-	-	-	-
ncbi_113804119	2	3.70E-13	3.00E-12	psmd11a	PREDICTED: 26S proteasome non-ATPase regulatory subunit 11-like [Hyalella azteca]	Human Diseases;Genetic Information Processing	Infectious diseases;Folding, sorting and degradation	ko05169//Epstein-Barr virus infection;ko03050//Proteasome	K03036;K03036	-	-	-
ncbi_113804121	3	8.08E-133	2.64E-131	Hr96	Nuclear hormone receptor HR96 [Daphnia magna]	Organismal Systems	Aging	ko04212//Longevity regulating pathway - worm	K14035	-	-	-
ncbi_113804131	2	1.43E-251	7.27E-250	G3BP2	PREDICTED: ras GTPase-activating protein-binding protein 2 [Tribolium castaneum]	-	-	-	-	-	-	-
ncbi_113804138	3	1.05E-10	7.71E-10	Apc	PREDICTED: adenomatous polyposis coli homolog [Hyalella azteca]	Human Diseases;Human Diseases;Human Diseases;Cellular Processes;Environmental Information Processing;Human Diseases;Human Diseases;Human Diseases;Environmental Information Processing;Human Diseases;Human Diseases;Cellular Processes;Human Diseases;Human Diseases;Human Diseases	Cancers;Infectious diseases;Cancers;Cell motility;Signal transduction;Infectious diseases;Cancers;Endocrine and metabolic diseases;Signal transduction;Cancers;Cancers;Cellular community - eukaryotes;Cancers;Cancers;Cancers	ko05200//Pathways in cancer;ko05165//Human papillomavirus infection;ko05225//Hepatocellular carcinoma;ko04810//Regulation of actin cytoskeleton;ko04390//Hippo signaling pathway;ko05166//HTLV-I infection;ko05206//MicroRNAs in cancer;ko04934//Cushing syndrome;ko04310//Wnt signaling pathway;ko05224//Breast cancer;ko05226//Gastric cancer;ko04550//Signaling pathways regulating pluripotency of stem cel…	K02085;K02085;K02085;K02085;K02085;K02085;K02085;K02085;K02085;K02085;K02085;K02085;K02085;K02085;K02085	-	-	-
ncbi_113804151	3	4.66E-37	6.47E-36	HtrA2	HtrA2 [Litopenaeus vannamei]	Cellular Processes;Cellular Processes;Human Diseases;Cellular Processes	Cell growth and death;Cell growth and death;Neurodegenerative diseases;Cell growth and death	ko04210//Apoptosis;ko04214//Apoptosis - fly;ko05012//Parkinson disease;ko04215//Apoptosis - multiple species	K08669;K08669;K08669;K08669	-	-	-
ncbi_113804174	4	9.63E-13	7.69E-12	--	-	-	-	-	-	-	-	-
ncbi_113804183	2	8.33E-22	8.71E-21	--	AAEL017147-PB [Aedes aegypti]	-	-	-	-	-	-	-
ncbi_113804185	2	8.38E-66	1.69E-64	mRpL23	AAEL005150-PA [Aedes aegypti]	Genetic Information Processing	Translation	ko03010//Ribosome	K02892	GO:0000315//organellar large ribosomal subunit	GO:0005198//structural molecule activity	-
ncbi_113804190	1	1.45E-69	3.04E-68	--	PREDICTED: protein phosphatase 1 regulatory subunit 42-like [Amphimedon queenslandica]	-	-	-	-	-	-	-
ncbi_113804244	4	7.29E-53	1.26E-51	Ik	PREDICTED: protein Red-like [Hyalella azteca]	-	-	-	-	GO:0031981//nuclear lumen;GO:0043232//intracellular non-membrane-bounded organelle;GO:0044421//extracellular region part	GO:0005515//protein binding	GO:0002376//immune system process;GO:0007154//cell communication
ncbi_113804204	2	2.22E-41	3.27E-40	CG6353	PREDICTED: protein archease-like [Lingula anatina]	-	-	-	-	-	-	-
ncbi_113804205	2	2.44E-79	5.56E-78	Srp19	GM13769 [Drosophila sechellia]	Genetic Information Processing	Folding, sorting and degradation	ko03060//Protein export	K03105	-	-	-
ncbi_113804207	1	1.85E-25	2.11E-24	AMFR	PREDICTED: E3 ubiquitin-protein ligase AMFR-like isoform X1 [Limulus polyphemus]	Genetic Information Processing	Folding, sorting and degradation	ko04141//Protein processing in endoplasmic reticulum	K10636	-	-	-
ncbi_113804245	2	4.85E-10	3.48E-09	--	-	-	-	-	-	-	-	-
ncbi_113804219	4	1.49E-85	3.58E-84	cript	PREDICTED: cysteine-rich PDZ-binding protein-like [Hyalella azteca]	-	-	-	-	-	-	-
ncbi_113804220	2	3.09E-16	2.77E-15	pth	PREDICTED: probable peptidyl-tRNA hydrolase 2 [Gekko japonicus]	-	-	-	-	-	-	-
ncbi_113804224	2	5.35E-59	1.00E-57	ANGEL2	PREDICTED: protein angel homolog 2 [Anoplophora glabripennis]	-	-	-	-	-	-	-
ncbi_113804226	4	8.17E-170	3.21E-168	--	PREDICTED: CKLF-like MARVEL transmembrane domain-containing protein 4 [Hyalella azteca]	-	-	-	-	-	-	-
ncbi_113804260	4	5.40E-10	3.87E-09	WDR83	PREDICTED: WD repeat domain-containing protein 83 [Pelodiscus sinensis]	-	-	-	-	GO:0005681//spliceosomal complex	-	-
ncbi_113804263	2	2.41E-27	2.86E-26	eipr1	PREDICTED: protein TSSC1-like [Hyalella azteca]	-	-	-	-	-	-	-
ncbi_113804304	2	0	0	RpL8	ribosomal protein L8 [Litopenaeus vannamei]	Genetic Information Processing	Translation	ko03010//Ribosome	K02938	GO:0030529//intracellular ribonucleoprotein complex	-	GO:0010467//gene expression
ncbi_113804306	2	1.43E-18	1.37E-17	SUMO3	PREDICTED: small ubiquitin-related modifier 2-like [Hyalella azteca]	Genetic Information Processing;Human Diseases	Translation;Cardiovascular diseases	ko03013//RNA transport;ko05418//Fluid shear stress and atherosclerosis	K12160;K12160	-	GO:0046914//transition metal ion binding	-
ncbi_113804311	2	5.33E-63	1.05E-61	mmgt1	Membrane magnesium transporter 1-B [Zootermopsis nevadensis]	-	-	-	-	-	-	-
ncbi_113804316	4	1.86E-59	3.50E-58	tmem147	PREDICTED: transmembrane protein 147-like [Hyalella azteca]	-	-	-	-	-	-	-
ncbi_113804320	5	8.44E-10	5.99E-09	Snapin	PREDICTED: SNARE-associated protein Snapin-like [Hyalella azteca]	-	-	-	-	-	-	-
ncbi_113804318	5	2.74E-12	2.15E-11	N6AMT1	PREDICTED: hemK methyltransferase family member 2-like [Branchiostoma belcheri]	-	-	-	-	-	GO:0016740//transferase activity	-
ncbi_113804330	5	4.44E-69	9.26E-68	hdc	PREDICTED: headcase protein-like [Hyalella azteca]	-	-	-	-	-	-	-
ncbi_113804332	3	4.02E-25	4.55E-24	--	-	-	-	-	-	-	-	-
ncbi_113804344	2	0	0	RPL23	PREDICTED: 60S ribosomal protein L23 [Scleropages formosus]	Genetic Information Processing	Translation	ko03010//Ribosome	K02894	GO:0005924//cell-substrate adherens junction;GO:0015934//large ribosomal subunit;GO:0031988//membrane-bounded vesicle	GO:0003723//RNA binding;GO:0005198//structural molecule activity;GO:0008092//cytoskeletal protein binding	GO:0000956//nuclear-transcribed mRNA catabolic process;GO:0006412//translation;GO:0006606//protein import into nucleus;GO:0006613//cotranslational protein targeting to membrane;GO:0016032//viral process;GO:0030154//cell differentiation;GO:0032774//RNA biosynthetic process;GO:0043624//cellular protein complex disassembly;GO:0051231//spindle elongation
ncbi_113804379	3	2.62E-10	1.90E-09	--	-	-	-	-	-	-	-	-
ncbi_113804371	4	1.36E-09	9.59E-09	ab	Broad-complex protein isoform 6 variant 1 [Penaeus monodon]	-	-	-	-	-	-	-
ncbi_113804381	3	6.09E-44	9.30E-43	--	-	-	-	-	-	-	-	-
ncbi_113804382	2	2.58E-11	1.95E-10	--	-	-	-	-	-	-	-	-
ncbi_113804373	2	4.33E-20	4.32E-19	Oat	AAEL005289-PA [Aedes aegypti]	Metabolism;Metabolism	Global and overview maps;Amino acid metabolism	ko01100//Metabolic pathways;ko00330//Arginine and proline metabolism	K00819;K00819	-	-	-
ncbi_113804384	4	2.74E-20	2.75E-19	PPP2R5D	PREDICTED: serine/threonine-protein phosphatase 2A 56 kDa regulatory subunit gamma isoform isoform X3 [Anoplophora glabripennis]	Human Diseases;Environmental Information Processing;Organismal Systems;Environmental Information Processing;Environmental Information Processing;Genetic Information Processing;Cellular Processes;Organismal Systems	Infectious diseases;Signal transduction;Circulatory system;Signal transduction;Signal transduction;Translation;Cell growth and death;Nervous system	ko05165//Human papillomavirus infection;ko04151//PI3K-Akt signaling pathway;ko04261//Adrenergic signaling in cardiomyocytes;ko04071//Sphingolipid signaling pathway;ko04152//AMPK signaling pathway;ko03015//mRNA surveillance pathway;ko04114//Oocyte meiosis;ko04728//Dopaminergic synapse	K11584;K11584;K11584;K11584;K11584;K11584;K11584;K11584	-	-	-
ncbi_113804388	4	5.05E-27	5.93E-26	CNN3	Calponin-3 [Daphnia magna]	-	-	-	-	-	-	-
ncbi_113804421	5	1.25E-23	1.36E-22	ARHGAP17	PREDICTED: rho GTPase-activating protein 44-like [Hyalella azteca]	Cellular Processes	Cellular community - eukaryotes	ko04530//Tight junction	K20638	-	-	-
ncbi_113804406	2	8.28E-15	7.12E-14	--	-	-	-	-	-	-	-	-
ncbi_113804404	2	1.51E-30	1.91E-29	IFRD1	interferon-related developmental regulator 1 [Macrobrachium rosenbergii]	-	-	-	-	-	-	-
ncbi_113804412	1	2.48E-100	6.56E-99	--	AGAP010349-PA, partial [Anopheles gambiae str. PEST] [Anopheles gambiae]	-	-	-	-	-	-	-
ncbi_113804417	3	1.04E-13	8.58E-13	E75	ecdysteroid receptor E75 [Litopenaeus vannamei]	-	-	-	-	-	-	-
ncbi_113804422	2	0	0	rps6	ribosomal protein S6, partial [Macrobrachium olfersii]	Organismal Systems;Human Diseases;Environmental Information Processing;Genetic Information Processing;Environmental Information Processing;Organismal Systems;Environmental Information Processing;Environmental Information Processing;Human Diseases	Environmental adaptation;Cancers;Signal transduction;Translation;Signal transduction;Endocrine system;Signal transduction;Signal transduction;Drug resistance	ko04714//Thermogenesis;ko05205//Proteoglycans in cancer;ko04151//PI3K-Akt signaling pathway;ko03010//Ribosome;ko04150//mTOR signaling pathway;ko04910//Insulin signaling pathway;ko04066//HIF-1 signaling pathway;ko04371//Apelin signaling pathway;ko01521//EGFR tyrosine kinase inhibitor resistance	K02991;K02991;K02991;K02991;K02991;K02991;K02991;K02991;K02991	-	-	-
ncbi_113804428	2	8.83E-26	1.01E-24	Rpn2	PREDICTED: 26S proteasome non-ATPase regulatory subunit 1-like isoform X1 [Hyalella azteca]	Human Diseases;Genetic Information Processing	Infectious diseases;Folding, sorting and degradation	ko05169//Epstein-Barr virus infection;ko03050//Proteasome	K03032;K03032	-	-	GO:0019222//regulation of metabolic process
ncbi_113804451	2	9.18E-33	1.20E-31	Dync1li2	Cytoplasmic dynein 1 light intermediate chain 2 [Zootermopsis nevadensis]	Cellular Processes;Human Diseases;Organismal Systems	Transport and catabolism;Infectious diseases;Excretory system	ko04145//Phagosome;ko05132//Salmonella infection;ko04962//Vasopressin-regulated water reabsorption	K10416;K10416;K10416	-	-	-
ncbi_113804454	4	4.13E-120	1.25E-118	B0563.6	G protein-coupled receptor [Procambarus clarkii]	-	-	-	-	-	-	-
ncbi_113804462	2	8.19E-149	2.95E-147	Jmjd7	PREDICTED: jmjC domain-containing protein 7 [Saccoglossus kowalevskii]	-	-	-	-	-	-	-
ncbi_113804464	2	2.86E-108	8.11E-107	naa20	N-alpha-acetyltransferase 20, partial [Stegodyphus mimosarum]	-	-	-	-	-	-	-
ncbi_113804503	3	1.14E-14	9.74E-14	Szrd1	PREDICTED: SUZ domain-containing protein 1 isoform X1 [Cimex lectularius]	-	-	-	-	-	-	-
ncbi_113804512	2	2.75E-28	3.33E-27	Cfap20	PREDICTED: cilia- and flagella-associated protein 20 [Hyalella azteca]	-	-	-	-	GO:0005815//microtubule organizing center;GO:0031988//membrane-bounded vesicle;GO:0042995//cell projection	GO:0003723//RNA binding	GO:0007631//feeding behavior;GO:0018200//peptidyl-glutamic acid modification;GO:0040017//positive regulation of locomotion;GO:0048858//cell projection morphogenesis;GO:0060295//regulation of cilium movement involved in cell motility
ncbi_113804513	5	1.82E-29	2.23E-28	TOP2A	PREDICTED: DNA topoisomerase 2-alpha-like isoform X3 [Hyalella azteca]	Human Diseases	Drug resistance	ko01524//Platinum drug resistance	K03164	-	-	-
ncbi_113804519	5	7.17E-24	7.86E-23	Pprc1	PREDICTED: peroxisome proliferator-activated receptor gamma coactivator 1-alpha, partial [Apis cerana]	-	-	-	-	-	-	-
ncbi_113804523	4	2.63E-10	1.91E-09	--	-	-	-	-	-	-	-	-
ncbi_113804524	1	1.23E-55	2.21E-54	--	-	-	-	-	-	-	-	-
ncbi_113804525	4	3.32E-68	6.83E-67	smc3	PREDICTED: structural maintenance of chromosomes protein 3-like isoform X1 [Hyalella azteca]	Cellular Processes;Cellular Processes	Cell growth and death;Cell growth and death	ko04110//Cell cycle;ko04114//Oocyte meiosis	K06669;K06669	-	-	-
ncbi_113804544	1	0	0	--	PDGF/VEGF-related factor 1 [Eriocheir sinensis]	Human Diseases;Human Diseases;Cellular Processes;Human Diseases;Environmental Information Processing;Environmental Information Processing;Human Diseases;Human Diseases;Environmental Information Processing;Environmental Information Processing;Organismal Systems;Human Diseases;Environmental Information Processing;Human Diseases;Human Diseases;Human Diseases;Human Diseases;Human Diseases;Human Disea…	Cancers;Infectious diseases;Cellular community - eukaryotes;Cancers;Signal transduction;Signal transduction;Cardiovascular diseases;Cancers;Signal transduction;Signal transduction;Endocrine system;Infectious diseases;Signal transduction;Endocrine and metabolic diseases;Infectious diseases;Cancers;Cancers;Drug resistance;Immune diseases;Cancers;Signal transduction	ko05200//Pathways in cancer;ko05165//Human papillomavirus infection;ko04510//Focal adhesion;ko05205//Proteoglycans in cancer;ko04151//PI3K-Akt signaling pathway;ko04015//Rap1 signaling pathway;ko05418//Fluid shear stress and atherosclerosis;ko05206//MicroRNAs in cancer;ko04010//MAPK signaling pathway;ko04014//Ras signaling pathway;ko04926//Relaxin signaling pathway;ko05163//Human cytomegalovirus …	K05448;K05448;K05448;K05448;K05448;K05448;K05448;K05448;K05448;K05448;K05448;K05448;K05448;K05448;K05448;K05448;K05448;K05448;K05448;K05448;K05448	-	-	-
ncbi_113804553	3	0	0	--	C-type lectin 2 [Marsupenaeus japonicus]	-	-	-	-	-	-	-
ncbi_113804554	1	1.72E-13	1.41E-12	mapk15	PREDICTED: extracellular signal-regulated kinase 2-like [Acropora digitifera]	Organismal Systems	Immune system	ko04657//IL-17 signaling pathway	K19603	-	GO:0004702//receptor signaling protein serine/threonine kinase activity;GO:0032550//purine ribonucleoside binding	GO:0006464//cellular protein modification process;GO:0006796//phosphate-containing compound metabolic process
ncbi_113804555	2	0	0	COX6B2	mitochondrial cytochrome c oxidase subunit VIb [Litopenaeus vannamei]	Metabolism;Organismal Systems;Human Diseases;Human Diseases;Human Diseases;Human Diseases;Metabolism;Organismal Systems	Global and overview maps;Environmental adaptation;Neurodegenerative diseases;Neurodegenerative diseases;Endocrine and metabolic diseases;Neurodegenerative diseases;Energy metabolism;Circulatory system	ko01100//Metabolic pathways;ko04714//Thermogenesis;ko05016//Huntington disease;ko05010//Alzheimer disease;ko04932//Non-alcoholic fatty liver disease (NAFLD);ko05012//Parkinson disease;ko00190//Oxidative phosphorylation;ko04260//Cardiac muscle contraction	K02267;K02267;K02267;K02267;K02267;K02267;K02267;K02267	-	-	-
ncbi_113804573	4	1.81E-22	1.92E-21	rbm22	PREDICTED: pre-mRNA-splicing factor RBM22-like [Hyalella azteca]	Genetic Information Processing	Transcription	ko03040//Spliceosome	K12872	GO:0005681//spliceosomal complex	GO:0003723//RNA binding;GO:0043169//cation binding	GO:0000398//mRNA splicing, via spliceosome;GO:0010628//positive regulation of gene expression;GO:0044707//single-multicellular organism process;GO:0050794//regulation of cellular process
ncbi_113804584	5	2.92E-13	2.38E-12	--	-	-	-	-	-	-	-	-
ncbi_113804585	4	8.96E-14	7.44E-13	--	-	-	-	-	-	-	-	-
ncbi_113804594	4	1.58E-36	2.17E-35	ddost	PREDICTED: dolichyl-diphosphooligosaccharide--protein glycosyltransferase 48 kDa subunit-like isoform X2 [Hyalella azteca]	Metabolism;Genetic Information Processing;Metabolism	Global and overview maps;Folding, sorting and degradation;Glycan biosynthesis and metabolism	ko01100//Metabolic pathways;ko04141//Protein processing in endoplasmic reticulum;ko00510//N-Glycan biosynthesis	K12670;K12670;K12670	GO:0032991//macromolecular complex;GO:0043231//intracellular membrane-bounded organelle;GO:0044425//membrane part	GO:0016740//transferase activity	GO:0006487//protein N-linked glycosylation;GO:0010033//response to organic substance;GO:0046649//lymphocyte activation
ncbi_113804595	4	1.15E-35	1.55E-34	--	-	-	-	-	-	-	-	-
ncbi_113804597	4	1.62E-245	8.10E-244	LSM3	U6 snRNA-associated Sm-like protein LSm3 [Xenopus tropicalis]	Genetic Information Processing;Genetic Information Processing	Transcription;Folding, sorting and degradation	ko03040//Spliceosome;ko03018//RNA degradation	K12622;K12622	GO:0005681//spliceosomal complex	-	-
ncbi_113804609	4	2.27E-282	1.25E-280	--	PREDICTED: uncharacterized protein LOC108678985 [Hyalella azteca]	-	-	-	-	-	-	-
ncbi_113804610	4	5.44E-141	1.89E-139	--	PREDICTED: uncharacterized protein LOC108678985 [Hyalella azteca]	-	-	-	-	-	-	-
ncbi_113804632	2	5.74E-21	5.85E-20	--	PREDICTED: vacuolar ATPase assembly integral membrane protein VMA21-like [Parasteatoda tepidariorum]	-	-	-	-	-	-	-
ncbi_113804679	2	2.42E-30	3.04E-29	wdr92	PREDICTED: WD repeat-containing protein 92-like [Limulus polyphemus]	-	-	-	-	-	GO:0042393//histone binding	GO:0012501//programmed cell death;GO:0016571//histone methylation
ncbi_113804683	4	2.32E-94	5.93E-93	cdc-37	PREDICTED: hsp90 co-chaperone Cdc37 [Vollenhovia emeryi]	Environmental Information Processing	Signal transduction	ko04151//PI3K-Akt signaling pathway	K09554	-	GO:0005515//protein binding;GO:0030295//protein kinase activator activity	GO:0007167//enzyme linked receptor protein signaling pathway;GO:0030154//cell differentiation;GO:0043410//positive regulation of MAPK cascade;GO:0046578//regulation of Ras protein signal transduction
ncbi_113804686	5	7.68E-11	5.69E-10	ARRB1	Beta-arrestin-1 [Zootermopsis nevadensis]	Cellular Processes;Environmental Information Processing;Organismal Systems;Organismal Systems;Organismal Systems;Organismal Systems;Human Diseases;Environmental Information Processing;Organismal Systems	Transport and catabolism;Signal transduction;Immune system;Endocrine system;Nervous system;Endocrine system;Substance dependence;Signal transduction;Sensory system	ko04144//Endocytosis;ko04010//MAPK signaling pathway;ko04062//Chemokine signaling pathway;ko04926//Relaxin signaling pathway;ko04728//Dopaminergic synapse;ko04928//Parathyroid hormone synthesis, secretion and action;ko05032//Morphine addiction;ko04340//Hedgehog signaling pathway;ko04740//Olfactory transduction	K04439;K04439;K04439;K04439;K04439;K04439;K04439;K04439;K04439	-	-	-
ncbi_113804688	5	9.70E-23	1.03E-21	DCLK1	PREDICTED: serine/threonine-protein kinase DCLK1-like [Hyalella azteca]	-	-	-	-	-	GO:0016301//kinase activity	GO:0007409//axonogenesis;GO:0007417//central nervous system development
ncbi_113804698	3	4.76E-12	3.70E-11	--	PREDICTED: protein amalgam-like isoform X2 [Hyalella azteca]	-	-	-	-	-	-	-
ncbi_113804733	2	7.55E-20	7.49E-19	--	PREDICTED: ubiquitin conjugation factor E4 B [Trachymyrmex zeteki]	Genetic Information Processing;Genetic Information Processing	Folding, sorting and degradation;Folding, sorting and degradation	ko04141//Protein processing in endoplasmic reticulum;ko04120//Ubiquitin mediated proteolysis	K10597;K10597	-	-	-
ncbi_113804709	2	2.48E-133	8.12E-132	Utp14a	GH14745 [Drosophila grimshawi]	Genetic Information Processing	Translation	ko03008//Ribosome biogenesis in eukaryotes	K14567	-	-	-
ncbi_113804715	2	0	0	Rpl35	ribosomal protein L35 [Procambarus clarkii]	Genetic Information Processing	Translation	ko03010//Ribosome	K02918	-	-	-
ncbi_113804717	4	4.05E-30	5.06E-29	Tmed2	PREDICTED: transmembrane emp24 domain-containing protein 2-like isoform X1 [Hyalella azteca]	-	-	-	-	-	-	-
ncbi_113804724	2	2.62E-220	1.20E-218	porin	voltage-dependent anion-selective channel [Eriocheir sinensis]	Human Diseases;Human Diseases;Environmental Information Processing;Cellular Processes;Human Diseases;Environmental Information Processing;Cellular Processes;Organismal Systems;Organismal Systems;Cellular Processes	Neurodegenerative diseases;Infectious diseases;Signal transduction;Cell growth and death;Neurodegenerative diseases;Signal transduction;Cell growth and death;Immune system;Digestive system;Cell growth and death	ko05016//Huntington disease;ko05166//HTLV-I infection;ko04022//cGMP - PKG signaling pathway;ko04217//Necroptosis;ko05012//Parkinson disease;ko04020//Calcium signaling pathway;ko04218//Cellular senescence;ko04621//NOD-like receptor signaling pathway;ko04979//Cholesterol metabolism;ko04216//Ferroptosis	K15040;K15040;K15040;K15040;K15040;K15040;K15040;K15040;K15040;K15040	-	GO:0005244//voltage-gated ion channel activity	GO:0006820//anion transport;GO:0034765//regulation of ion transmembrane transport
ncbi_113804729	3	0	0	Angpt4	PREDICTED: microfibril-associated glycoprotein 4-like [Clupea harengus]	-	-	-	-	-	-	-
ncbi_113804775	4	7.38E-125	2.31E-123	--	Replication protein A 14 kDa subunit [Orchesella cincta]	Genetic Information Processing;Genetic Information Processing;Genetic Information Processing;Genetic Information Processing;Genetic Information Processing	Replication and repair;Replication and repair;Replication and repair;Replication and repair;Replication and repair	ko03460//Fanconi anemia pathway;ko03420//Nucleotide excision repair;ko03440//Homologous recombination;ko03030//DNA replication;ko03430//Mismatch repair	K10740;K10740;K10740;K10740;K10740	-	-	-
ncbi_113804780	5	4.86E-16	4.34E-15	--	B-cell lymphoma 6 protein-like protein [Zootermopsis nevadensis]	-	-	-	-	-	-	-
ncbi_113804801	2	5.61E-54	9.92E-53	--	Uncharacterized transposase-like protein HI1328.1, partial [Camponotus floridanus]	-	-	-	-	-	-	-
ncbi_113804802	5	0	0	mtpn	Myotrophin [Orchesella cincta]	-	-	-	-	-	-	-
ncbi_113804807	2	2.25E-37	3.13E-36	Pdcd2	PREDICTED: programmed cell death protein 2 [Nasonia vitripennis]	-	-	-	-	-	-	-
ncbi_113804850	4	8.75E-35	1.17E-33	--	-	-	-	-	-	-	-	-
ncbi_113804853	2	2.01E-24	2.23E-23	--	Ankyrin repeat domain-containing protein 54, partial [Stegodyphus mimosarum]	-	-	-	-	-	-	-
ncbi_113804854	2	2.91E-11	2.19E-10	--	PREDICTED: N-acetyltransferase 6-like [Crassostrea gigas]	-	-	-	-	-	-	-
ncbi_113804861	5	5.19E-15	4.49E-14	--	PREDICTED: zinc finger protein 845-like, partial [Nothobranchius furzeri]	-	-	-	-	-	-	-
ncbi_113804862	2	1.28E-31	1.64E-30	--	PREDICTED: oocyte zinc finger protein XlCOF6-like [Larimichthys crocea]	-	-	-	-	-	-	-
ncbi_113804873	2	3.71E-12	2.90E-11	COQ3	PREDICTED: ubiquinone biosynthesis O-methyltransferase [Trichogramma pretiosum]	Metabolism;Metabolism	Global and overview maps;Metabolism of cofactors and vitamins	ko01100//Metabolic pathways;ko00130//Ubiquinone and other terpenoid-quinone biosynthesis	K00591;K00591	-	GO:0008168//methyltransferase activity	-
ncbi_113804891	2	7.15E-34	9.47E-33	KATNAL1	Katanin p60 ATPase-containing subunit A-like 1 [Zootermopsis nevadensis]	-	-	-	-	GO:0005815//microtubule organizing center;GO:0005819//spindle	GO:0005488//binding;GO:0016787//hydrolase activity	GO:0044763//single-organism cellular process
ncbi_113804897	3	9.45E-48	1.52E-46	--	PREDICTED: migration and invasion enhancer 1-like isoform X1 [Hyalella azteca]	-	-	-	-	-	-	-
ncbi_113804927	4	1.18E-60	2.25E-59	Cbp20	PREDICTED: nuclear cap-binding protein subunit 2-like [Dendroctonus ponderosae]	Genetic Information Processing;Genetic Information Processing;Genetic Information Processing	Translation;Transcription;Translation	ko03013//RNA transport;ko03040//Spliceosome;ko03015//mRNA surveillance pathway	K12883;K12883;K12883	-	-	-
ncbi_113804936	3	1.23E-38	1.74E-37	SINHCAF	PREDICTED: LOW QUALITY PROTEIN: protein FAM60A [Linepithema humile]	-	-	-	-	-	-	-
ncbi_113804953	4	8.24E-67	1.68E-65	MED30	PREDICTED: mediator of RNA polymerase II transcription subunit 30-like [Hyalella azteca]	Organismal Systems	Endocrine system	ko04919//Thyroid hormone signaling pathway	K15143	-	-	-
ncbi_113804964	2	1.01E-12	8.02E-12	cbc	PREDICTED: protein CLP1 homolog [Hyalella azteca]	Genetic Information Processing	Translation	ko03015//mRNA surveillance pathway	K14399	-	-	-
ncbi_113804962	2	8.84E-19	8.54E-18	CG5815	PREDICTED: protein SPT2 homolog [Hyalella azteca]	-	-	-	-	-	-	-
ncbi_113804963	2	8.54E-30	1.06E-28	RPAP3	PREDICTED: RNA polymerase II-associated protein 3-like [Sinocyclocheilus rhinocerous]	-	-	-	-	-	-	-
ncbi_113805007	2	1.82E-21	1.89E-20	Snip1	PREDICTED: smad nuclear-interacting protein 1-like [Hyalella azteca]	-	-	-	-	-	-	-
ncbi_113805000	2	5.39E-22	5.67E-21	Isy1	PREDICTED: pre-mRNA-splicing factor ISY1 homolog [Octopus bimaculoides]	Genetic Information Processing	Transcription	ko03040//Spliceosome	K12870	-	-	-
ncbi_113805023	5	2.47E-79	5.62E-78	--	PREDICTED: nephrin-like [Hyalella azteca]	-	-	-	-	-	-	-
ncbi_113805021	2	1.48E-12	1.18E-11	Abcc1	PREDICTED: multidrug resistance-associated protein 1 isoform X7 [Trichogramma pretiosum]	Human Diseases;Environmental Information Processing;Organismal Systems;Environmental Information Processing;Human Diseases	Cancers;Signal transduction;Digestive system;Membrane transport;Drug resistance	ko05206//MicroRNAs in cancer;ko04071//Sphingolipid signaling pathway;ko04977//Vitamin digestion and absorption;ko02010//ABC transporters;ko01523//Antifolate resistance	K05665;K05665;K05665;K05665;K05665	-	-	-
ncbi_113805029	2	5.55E-22	5.83E-21	HADHA	PREDICTED: trifunctional enzyme subunit alpha, mitochondrial-like [Hyalella azteca]	Metabolism;Metabolism;Metabolism;Metabolism;Metabolism;Metabolism;Metabolism;Metabolism;Metabolism;Metabolism;Metabolism;Metabolism	Global and overview maps;Global and overview maps;Amino acid metabolism;Amino acid metabolism;Lipid metabolism;Global and overview maps;Amino acid metabolism;Metabolism of other amino acids;Carbohydrate metabolism;Carbohydrate metabolism;Lipid metabolism;Lipid metabolism	ko01100//Metabolic pathways;ko01200//Carbon metabolism;ko00310//Lysine degradation;ko00280//Valine, leucine and isoleucine degradation;ko00071//Fatty acid degradation;ko01212//Fatty acid metabolism;ko00380//Tryptophan metabolism;ko00410//beta-Alanine metabolism;ko00640//Propanoate metabolism;ko00650//Butanoate metabolism;ko00062//Fatty acid elongation;ko01040//Biosynthesis of unsaturated fatty ac…	K07515;K07515;K07515;K07515;K07515;K07515;K07515;K07515;K07515;K07515;K07515;K07515	-	-	-
ncbi_113805033	3	2.32E-23	2.51E-22	--	-	-	-	-	-	-	-	-
ncbi_113805050	2	6.20E-48	1.00E-46	PWP2	PREDICTED: periodic tryptophan protein 2 homolog [Anoplophora glabripennis]	Genetic Information Processing	Translation	ko03008//Ribosome biogenesis in eukaryotes	K14558	-	-	-
ncbi_113805056	2	1.05E-52	1.81E-51	--	-	-	-	-	-	-	-	-
ncbi_113805092	3	2.23E-44	3.41E-43	--	galectin [Litopenaeus vannamei]	-	-	-	-	-	-	-
ncbi_113805101	3	6.47E-12	5.01E-11	SLC4A10	sodium bicarbonate cotransporter isoform 1 [Cherax cainii]	-	-	-	-	-	-	-
ncbi_113805128	4	1.95E-30	2.45E-29	BRD2	PREDICTED: bromodomain-containing protein 3-like [Hyalella azteca]	-	-	-	-	-	-	-
ncbi_113805133	4	2.23E-36	3.06E-35	--	-	-	-	-	-	-	-	-
ncbi_113805141	3	8.24E-27	9.63E-26	Hex-t2	PREDICTED: hexokinase type 2-like isoform X2 [Hyalella azteca]	Metabolism;Metabolism;Organismal Systems;Metabolism;Metabolism;Environmental Information Processing;Metabolism;Human Diseases;Metabolism;Metabolism;Human Diseases;Organismal Systems;Metabolism	Global and overview maps;Global and overview maps;Endocrine system;Carbohydrate metabolism;Carbohydrate metabolism;Signal transduction;Carbohydrate metabolism;Cancers;Carbohydrate metabolism;Carbohydrate metabolism;Endocrine and metabolic diseases;Digestive system;Biosynthesis of other secondary metabolites	ko01100//Metabolic pathways;ko01200//Carbon metabolism;ko04910//Insulin signaling pathway;ko00010//Glycolysis / Gluconeogenesis;ko00520//Amino sugar and nucleotide sugar metabolism;ko04066//HIF-1 signaling pathway;ko00051//Fructose and mannose metabolism;ko05230//Central carbon metabolism in cancer;ko00500//Starch and sucrose metabolism;ko00052//Galactose metabolism;ko04930//Type II diabetes mell…	K00844;K00844;K00844;K00844;K00844;K00844;K00844;K00844;K00844;K00844;K00844;K00844;K00844	-	GO:0004396//hexokinase activity;GO:0032550//purine ribonucleoside binding	GO:0006090//pyruvate metabolic process;GO:0016310//phosphorylation;GO:0040011//locomotion;GO:0044238//primary metabolic process
ncbi_113805147	4	4.97E-11	3.71E-10	Ythdc1	PREDICTED: YTH domain-containing protein 1-like [Hyalella azteca]	-	-	-	-	-	-	-
ncbi_113805155	2	6.16E-15	5.32E-14	--	NF-kappa-B-repressing factor [Crassostrea gigas]	-	-	-	-	-	-	-
ncbi_113805156	4	7.61E-46	1.19E-44	Sec11a	PREDICTED: signal peptidase complex catalytic subunit SEC11A [Branchiostoma belcheri]	Genetic Information Processing	Folding, sorting and degradation	ko03060//Protein export	K13280	-	-	-
ncbi_113805178	2	1.20E-09	8.46E-09	smarcad1	PREDICTED: SWI/SNF-related matrix-associated actin-dependent regulator of chromatin subfamily A containing DEAD/H box 1 homolog [Hyalella azteca]	Cellular Processes	Cellular community - eukaryotes	ko04550//Signaling pathways regulating pluripotency of stem cells	K14439	-	-	-
ncbi_113805187	5	3.45E-23	3.71E-22	--	PREDICTED: axoneme-associated protein mst101(2)-like isoform X3 [Branchiostoma belcheri]	-	-	-	-	-	-	-
ncbi_113805200	3	0	0	--	-	-	-	-	-	-	-	-
ncbi_113805211	3	1.00E-46	1.59E-45	Postn	PREDICTED: transforming growth factor-beta-induced protein ig-h3-like isoform X3 [Hyalella azteca]	-	-	-	-	-	-	-
ncbi_113805234	4	8.09E-12	6.24E-11	SREK1IP1	PREDICTED: protein SREK1IP1-like isoform X2 [Hyalella azteca]	-	-	-	-	-	-	-
ncbi_113805235	2	1.46E-12	1.16E-11	Cacul1	PREDICTED: CDK2-associated and cullin domain-containing protein 1 [Xenopus tropicalis]	-	-	-	-	-	-	GO:0009987//cellular process
ncbi_113805238	3	0	0	Drice	CAP-3 [Litopenaeus vannamei]	Human Diseases;Cellular Processes;Human Diseases;Cellular Processes;Human Diseases;Environmental Information Processing;Cellular Processes;Human Diseases;Human Diseases	Cancers;Cell growth and death;Neurodegenerative diseases;Cell growth and death;Endocrine and metabolic diseases;Signal transduction;Cell growth and death;Infectious diseases;Infectious diseases	ko05200//Pathways in cancer;ko04210//Apoptosis;ko05010//Alzheimer disease;ko04214//Apoptosis - fly;ko04932//Non-alcoholic fatty liver disease (NAFLD);ko04668//TNF signaling pathway;ko04215//Apoptosis - multiple species;ko05134//Legionellosis;ko05133//Pertussis	K04397;K04397;K04397;K04397;K04397;K04397;K04397;K04397;K04397	-	-	-
ncbi_113805239	4	8.87E-78	1.99E-76	paxt-1	PREDICTED: NF-kappa-B-repressing factor [Diachasma alloeum]	-	-	-	-	-	-	-
ncbi_113805226	4	5.02E-38	7.04E-37	--	PREDICTED: NF-kappa-B-repressing factor [Orussus abietinus]	-	-	-	-	-	-	-
ncbi_113805244	2	1.01E-15	8.94E-15	TPD52L2	Tumor protein D54 [Zootermopsis nevadensis]	-	-	-	-	-	-	-
ncbi_113805246	4	6.12E-60	1.16E-58	Nxt1	NTF2-related export protein 1 [Daphnia magna]	Genetic Information Processing;Human Diseases;Genetic Information Processing;Genetic Information Processing	Translation;Infectious diseases;Translation;Translation	ko03013//RNA transport;ko05164//Influenza A;ko03015//mRNA surveillance pathway;ko03008//Ribosome biogenesis in eukaryotes	K14285;K14285;K14285;K14285	-	-	-
ncbi_113805256	2	2.88E-55	5.15E-54	CG6388	PREDICTED: probable tRNA (guanine(26)-N(2))-dimethyltransferase [Hyalella azteca]	-	-	-	-	-	-	GO:0008152//metabolic process
ncbi_113805258	2	1.00E-40	1.46E-39	FGFR1OP	PREDICTED: FGFR1 oncogene partner-like [Acropora digitifera]	-	-	-	-	-	-	-
ncbi_113805265	2	1.58E-85	3.78E-84	lsm14a	PREDICTED: protein LSM14 homolog B-like isoform X4 [Limulus polyphemus]	-	-	-	-	-	-	-
ncbi_113805266	2	1.63E-193	6.89E-192	CYC1	Cytochrome c1 [Daphnia magna]	Metabolism;Organismal Systems;Human Diseases;Human Diseases;Human Diseases;Human Diseases;Metabolism;Organismal Systems	Global and overview maps;Environmental adaptation;Neurodegenerative diseases;Neurodegenerative diseases;Endocrine and metabolic diseases;Neurodegenerative diseases;Energy metabolism;Circulatory system	ko01100//Metabolic pathways;ko04714//Thermogenesis;ko05016//Huntington disease;ko05010//Alzheimer disease;ko04932//Non-alcoholic fatty liver disease (NAFLD);ko05012//Parkinson disease;ko00190//Oxidative phosphorylation;ko04260//Cardiac muscle contraction	K00413;K00413;K00413;K00413;K00413;K00413;K00413;K00413	-	GO:0046914//transition metal ion binding	-
ncbi_113805276	2	3.78E-27	4.45E-26	SNRNP35	U11/U12 small nuclear ribonucleoprotein 35 kDa protein, partial [Corvus brachyrhynchos]	-	-	-	-	-	-	-
ncbi_113805279	2	0	0	rpl-7	ribosomal protein L7 [Litopenaeus vannamei]	Genetic Information Processing	Translation	ko03010//Ribosome	K02937	-	-	-
ncbi_113805290	5	1.34E-91	3.35E-90	--	PREDICTED: NACHT, LRR and PYD domains-containing protein 12-like [Branchiostoma belcheri]	-	-	-	-	-	-	-
ncbi_113805291	5	7.29E-33	9.53E-32	NPC1	Patched domain-containing protein 3, partial [Orchesella cincta]	-	-	-	-	-	-	-
ncbi_113805292	2	1.06E-08	7.15E-08	GPX7	PREDICTED: glutathione peroxidase 7-like [Hyalella azteca]	Human Diseases;Metabolism;Organismal Systems;Metabolism;Human Diseases	Neurodegenerative diseases;Metabolism of other amino acids;Endocrine system;Lipid metabolism;Neurodegenerative diseases	ko05016//Huntington disease;ko00480//Glutathione metabolism;ko04918//Thyroid hormone synthesis;ko00590//Arachidonic acid metabolism;ko05014//Amyotrophic lateral sclerosis (ALS)	K00432;K00432;K00432;K00432;K00432	-	-	-
ncbi_113805298	5	4.34E-12	3.39E-11	Itp-r83A	inositol 1,4,5-trisphosphate receptor [Panulirus argus]	Human Diseases;Cellular Processes;Human Diseases;Organismal Systems;Organismal Systems;Organismal Systems;Organismal Systems;Human Diseases;Environmental Information Processing;Cellular Processes;Human Diseases;Organismal Systems;Environmental Information Processing;Cellular Processes;Organismal Systems;Human Diseases;Cellular Processes;Organismal Systems;Organismal Systems;Organismal Systems;Cel…	Cancers;Cell growth and death;Neurodegenerative diseases;Sensory system;Immune system;Endocrine system;Digestive system;Neurodegenerative diseases;Signal transduction;Transport and catabolism;Endocrine and metabolic diseases;Digestive system;Signal transduction;Cell growth and death;Nervous system;Infectious diseases;Cell growth and death;Circulatory system;Immune system;Nervous system;Cellular c…	ko05205//Proteoglycans in cancer;ko04210//Apoptosis;ko05016//Huntington disease;ko04745//Phototransduction - fly;ko04611//Platelet activation;ko04921//Oxytocin signaling pathway;ko04972//Pancreatic secretion;ko05010//Alzheimer disease;ko04022//cGMP - PKG signaling pathway;ko04140//Autophagy - animal;ko04934//Cushing syndrome;ko04971//Gastric acid secretion;ko04020//Calcium signaling pathway;ko042…	K04958;K04958;K04958;K04958;K04958;K04958;K04958;K04958;K04958;K04958;K04958;K04958;K04958;K04958;K04958;K04958;K04958;K04958;K04958;K04958;K04958;K04958;K04958;K04958;K04958;K04958;K04958;K04958;K04958;K04958;K04958;K04958;K04958;K04958;K04958;K04958;K04958;K04958;K04958;K04958;K04958	-	-	-
ncbi_113805307	5	8.19E-103	2.23E-101	SYP	PREDICTED: synaptophysin-like [Hyalella azteca]	-	-	-	-	GO:0031410//cytoplasmic vesicle;GO:0044425//membrane part;GO:0044456//synapse part	GO:0005515//protein binding;GO:0032934//sterol binding	GO:0006810//transport;GO:0048168//regulation of neuronal synaptic plasticity
ncbi_113805311	4	7.80E-12	6.02E-11	--	-	-	-	-	-	-	-	-
ncbi_113805324	3	1.23E-08	8.30E-08	--	-	-	-	-	-	-	-	-
ncbi_113805327	2	2.57E-61	4.96E-60	Dpf1	PREDICTED: atherin-like [Hyalella azteca]	-	-	-	-	-	-	-
ncbi_113805342	3	2.95E-81	6.84E-80	ABCG1	PREDICTED: ATP-binding cassette sub-family G member 4-like [Hyalella azteca]	Environmental Information Processing	Membrane transport	ko02010//ABC transporters	K05679	-	-	-
ncbi_113805346	2	1.01E-13	8.39E-13	--	PREDICTED: uncharacterized protein LOC108682804 [Hyalella azteca]	-	-	-	-	-	-	-
ncbi_113805348	2	3.22E-135	1.07E-133	Exosc3	PREDICTED: exosome complex component RRP40-like [Hyalella azteca]	Genetic Information Processing	Folding, sorting and degradation	ko03018//RNA degradation	K03681	-	-	-
ncbi_113805350	5	3.17E-55	5.66E-54	guaD	PREDICTED: guanine deaminase-like [Hyalella azteca]	Metabolism;Metabolism	Global and overview maps;Nucleotide metabolism	ko01100//Metabolic pathways;ko00230//Purine metabolism	K01487;K01487	-	-	-
ncbi_113805353	4	1.15E-13	9.53E-13	--	PREDICTED: transmembrane protein 209-like [Hyalella azteca]	-	-	-	-	-	-	-
ncbi_113805354	2	2.81E-47	4.49E-46	exog	PREDICTED: nuclease EXOG, mitochondrial isoform X1 [Falco cherrug]	-	-	-	-	-	-	-
ncbi_113805361	5	3.06E-104	8.42E-103	CD63	CD63 antigen [Lepeophtheirus salmonis]	Human Diseases;Cellular Processes	Cancers;Transport and catabolism	ko05205//Proteoglycans in cancer;ko04142//Lysosome	K06497;K06497	-	-	-
ncbi_113805362	2	1.20E-32	1.56E-31	l(1)G0156	Isocitrate dehydrogenase [NAD] subunit, mitochondrial [Daphnia magna]	Metabolism;Metabolism;Metabolism;Metabolism;Metabolism	Global and overview maps;Global and overview maps;Global and overview maps;Carbohydrate metabolism;Global and overview maps	ko01100//Metabolic pathways;ko01200//Carbon metabolism;ko01230//Biosynthesis of amino acids;ko00020//Citrate cycle (TCA cycle);ko01210//2-Oxocarboxylic acid metabolism	K00030;K00030;K00030;K00030;K00030	-	-	-
ncbi_113805365	4	1.19E-64	2.38E-63	Sdf2	PREDICTED: stromal cell-derived factor 2-like [Hyalella azteca]	-	-	-	-	-	GO:0016740//transferase activity	GO:0008152//metabolic process
ncbi_113805385	3	1.57E-16	1.42E-15	ATP7A	PREDICTED: LOW QUALITY PROTEIN: copper-transporting ATPase 1 [Cerapachys biroi]	-	-	-	-	-	-	-
ncbi_113805399	3	1.49E-37	2.08E-36	WBP2	WW domain-binding protein 2 [Lepeophtheirus salmonis]	-	-	-	-	-	-	-
ncbi_113805408	1	2.95E-24	3.26E-23	SLC35F6	PREDICTED: solute carrier family 35 member F6-like isoform X2 [Hyalella azteca]	-	-	-	-	GO:0000323//lytic vacuole;GO:0016020//membrane	-	GO:0044765//single-organism transport;GO:0050794//regulation of cellular process
ncbi_113805409	4	8.65E-66	1.75E-64	SelD	selenophosphate synthetase [Cherax destructor]	Metabolism;Metabolism	Global and overview maps;Metabolism of other amino acids	ko01100//Metabolic pathways;ko00450//Selenocompound metabolism	K01008;K01008	-	-	-
ncbi_113805414	2	1.85E-242	9.11E-241	--	-	-	-	-	-	-	-	-
ncbi_113805442	4	1.27E-12	1.01E-11	UCKL1	PREDICTED: uridine-cytidine kinase-like 1 [Hyalella azteca]	Metabolism;Metabolism;Metabolism	Global and overview maps;Xenobiotics biodegradation and metabolism;Nucleotide metabolism	ko01100//Metabolic pathways;ko00983//Drug metabolism - other enzymes;ko00240//Pyrimidine metabolism	K00876;K00876;K00876	-	-	-
ncbi_113805443	4	0	0	H3f3a	PREDICTED: histone H3.3 isoform X1 [Nothobranchius furzeri]	Human Diseases;Human Diseases;Human Diseases	Cancers;Substance dependence;Immune diseases	ko05202//Transcriptional misregulation in cancers;ko05034//Alcoholism;ko05322//Systemic lupus erythematosus	K11253;K11253;K11253	GO:0000786//nucleosome;GO:0031981//nuclear lumen;GO:0031988//membrane-bounded vesicle	GO:0000977//RNA polymerase II regulatory region sequence-specific DNA binding;GO:0031490//chromatin DNA binding;GO:0046983//protein dimerization activity	GO:0001558//regulation of cell growth;GO:0006306//DNA methylation;GO:0006334//nucleosome assembly;GO:0006342//chromatin silencing;GO:0006950//response to stress;GO:0007599//hemostasis;GO:0035556//intracellular signal transduction
ncbi_113805453	3	2.02E-110	5.82E-109	--	PREDICTED: uncharacterized protein LOC106655919 isoform X2 [Trichogramma pretiosum]	-	-	-	-	-	-	-
ncbi_113805455	2	0	0	Polr2f	PREDICTED: DNA-directed RNA polymerases I, II, and III subunit RPABC2-like [Hyalella azteca]	Metabolism;Human Diseases;Metabolism;Human Diseases;Metabolism;Genetic Information Processing;Organismal Systems	Global and overview maps;Neurodegenerative diseases;Nucleotide metabolism;Infectious diseases;Nucleotide metabolism;Transcription;Immune system	ko01100//Metabolic pathways;ko05016//Huntington disease;ko00230//Purine metabolism;ko05169//Epstein-Barr virus infection;ko00240//Pyrimidine metabolism;ko03020//RNA polymerase;ko04623//Cytosolic DNA-sensing pathway	K03014;K03014;K03014;K03014;K03014;K03014;K03014	GO:0044451//nucleoplasm part	GO:0034062//RNA polymerase activity	GO:0034645//cellular macromolecule biosynthetic process
ncbi_113805456	2	2.13E-62	4.16E-61	CAP1	Adenylyl cyclase-associated protein 1 [Daphnia magna]	-	-	-	-	-	-	-
ncbi_113805468	1	4.71E-10	3.38E-09	--	-	-	-	-	-	-	-	-
ncbi_113805490	1	5.59E-27	6.56E-26	PLD1	PREDICTED: phospholipase D alpha 1-like [Hyalella azteca]	Metabolism;Human Diseases;Cellular Processes;Human Diseases;Environmental Information Processing;Environmental Information Processing;Environmental Information Processing;Metabolism;Environmental Information Processing;Organismal Systems;Organismal Systems;Organismal Systems;Organismal Systems;Human Diseases;Metabolism	Global and overview maps;Cancers;Transport and catabolism;Cancers;Signal transduction;Signal transduction;Signal transduction;Lipid metabolism;Signal transduction;Immune system;Nervous system;Endocrine system;Endocrine system;Cancers;Lipid metabolism	ko01100//Metabolic pathways;ko05200//Pathways in cancer;ko04144//Endocytosis;ko05231//Choline metabolism in cancer;ko04024//cAMP signaling pathway;ko04014//Ras signaling pathway;ko04071//Sphingolipid signaling pathway;ko00564//Glycerophospholipid metabolism;ko04072//Phospholipase D signaling pathway;ko04666//Fc gamma R-mediated phagocytosis;ko04724//Glutamatergic synapse;ko04928//Parathyroid horm…	K01115;K01115;K01115;K01115;K01115;K01115;K01115;K01115;K01115;K01115;K01115;K01115;K01115;K01115;K01115	-	-	-
ncbi_113805493	4	1.33E-37	1.86E-36	rtn1-a	PREDICTED: reticulon-1-A isoform X4 [Camponotus floridanus]	-	-	-	-	-	-	-
ncbi_113805494	2	3.50E-13	2.84E-12	--	-	-	-	-	-	-	-	-
ncbi_113805507	1	3.07E-10	2.22E-09	MPI	PREDICTED: mannose-6-phosphate isomerase-like [Hyalella azteca]	Metabolism;Metabolism;Metabolism	Global and overview maps;Carbohydrate metabolism;Carbohydrate metabolism	ko01100//Metabolic pathways;ko00520//Amino sugar and nucleotide sugar metabolism;ko00051//Fructose and mannose metabolism	K01809;K01809;K01809	-	-	-
ncbi_113805519	3	3.65E-91	9.12E-90	Tl	Toll protein [Litopenaeus vannamei]	Organismal Systems	Immune system	ko04624//Toll and Imd signaling pathway	K18809	-	-	-
ncbi_113805521	2	3.54E-254	1.82E-252	eIF3-S8	PREDICTED: eukaryotic translation initiation factor 3 subunit C-like [Hyalella azteca]	Genetic Information Processing	Translation	ko03013//RNA transport	K03252	-	-	-
ncbi_113805527	4	4.92E-61	9.47E-60	lrrfip2	leucine-rich repeat flightless-I-interacting protein 2D [Litopenaeus vannamei]	-	-	-	-	-	-	-
ncbi_113805532	4	1.49E-94	3.83E-93	PDIA3	endoplasmic reticulum protein 57 [Penaeus monodon]	Genetic Information Processing;Human Diseases;Organismal Systems	Folding, sorting and degradation;Infectious diseases;Immune system	ko04141//Protein processing in endoplasmic reticulum;ko05163//Human cytomegalovirus infection;ko04612//Antigen processing and presentation	K08056;K08056;K08056	-	GO:0016740//transferase activity	GO:0008152//metabolic process;GO:0009987//cellular process
ncbi_113805558	3	0	0	reep6	receptor accessory protein 5 [Procambarus clarkii]	-	-	-	-	-	-	-
ncbi_113805571	4	7.43E-33	9.71E-32	cni	PREDICTED: protein cornichon-like [Hyalella azteca]	-	-	-	-	-	-	GO:0007165//signal transduction
ncbi_113805572	4	7.01E-49	1.15E-47	Wdr83os	PREDICTED: protein Asterix [Copidosoma floridanum]	-	-	-	-	-	-	-
ncbi_113805591	2	1.39E-61	2.70E-60	--	PREDICTED: CDGSH iron-sulfur domain-containing protein 3, mitochondrial [Diachasma alloeum]	-	-	-	-	-	-	-
ncbi_113805598	4	2.33E-53	4.07E-52	TMEM68	AAEL012417-PA [Aedes aegypti]	-	-	-	-	-	-	-
ncbi_113805605	2	4.90E-23	5.26E-22	ier3ip1	PREDICTED: immediate early response 3-interacting protein 1-like [Hyalella azteca]	-	-	-	-	-	-	-
ncbi_113805609	2	9.98E-78	2.24E-76	nst-1	PREDICTED: guanine nucleotide-binding protein-like 3 homolog isoform X1 [Limulus polyphemus]	Genetic Information Processing	Translation	ko03008//Ribosome biogenesis in eukaryotes	K14538	-	-	-
ncbi_113805652	3	3.31E-14	2.80E-13	--	C-type lectin [Fenneropenaeus merguiensis]	Cellular Processes;Human Diseases	Transport and catabolism;Infectious diseases	ko04145//Phagosome;ko05152//Tuberculosis	K06560;K06560	-	-	-
ncbi_113805634	4	9.82E-09	6.63E-08	Fbxl12	f-box lrr-repeat protein 12 [Lasius niger]	-	-	-	-	-	-	-
ncbi_113805638	2	3.76E-18	3.57E-17	SERHL2	PREDICTED: probable serine hydrolase [Hyalella azteca]	-	-	-	-	-	-	-
ncbi_113805637	3	3.71E-119	1.12E-117	SERHL2	PREDICTED: probable serine hydrolase [Hyalella azteca]	-	-	-	-	-	-	-
ncbi_113805645	3	1.15E-39	1.65E-38	SERHL2	PREDICTED: serine hydrolase-like protein [Branchiostoma belcheri]	-	-	-	-	-	-	-
ncbi_113805639	3	2.30E-24	2.55E-23	--	-	-	-	-	-	-	-	-
ncbi_113805669	4	4.97E-10	3.56E-09	cct3	PREDICTED: T-complex protein 1 subunit gamma-like isoform X1 [Hyalella azteca]	-	-	-	-	-	-	-
ncbi_113805672	4	2.31E-29	2.83E-28	MBD2	Methyl-CpG-binding domain protein 2 [Zootermopsis nevadensis]	-	-	-	-	GO:0043231//intracellular membrane-bounded organelle	-	-
ncbi_113805671	2	3.36E-18	3.19E-17	cct3	PREDICTED: T-complex protein 1 subunit gamma-like isoform X1 [Hyalella azteca]	-	-	-	-	-	-	-
ncbi_113805673	4	1.27E-32	1.65E-31	--	-	-	-	-	-	-	-	-
ncbi_113805683	2	3.28E-58	6.08E-57	FEZ2	PREDICTED: fasciculation and elongation protein zeta-2-like [Hyalella azteca]	-	-	-	-	-	-	-
ncbi_113805684	2	2.53E-23	2.73E-22	slc30a9	Zinc transporter 9 [Zootermopsis nevadensis]	-	-	-	-	GO:0031224//intrinsic component of membrane	GO:0015075//ion transmembrane transporter activity	GO:0006812//cation transport;GO:0044763//single-organism cellular process
ncbi_113805724	4	3.64E-13	2.96E-12	EHMT1	PREDICTED: titin homolog [Hyalella azteca]	Metabolism;Organismal Systems	Amino acid metabolism;Aging	ko00310//Lysine degradation;ko04211//Longevity regulating pathway - mammal	K11420;K11420	-	-	-
ncbi_113805733	2	0	0	--	-	-	-	-	-	-	-	-
ncbi_113805736	1	1.76E-18	1.69E-17	Prss2	RecName: Full=Chymotrypsin BII; Flags: Precursor	-	-	-	-	GO:0044421//extracellular region part	GO:0004175//endopeptidase activity	GO:0019538//protein metabolic process;GO:0032963//collagen metabolic process
ncbi_113805763	1	8.68E-11	6.41E-10	Folh1	PREDICTED: glutamate carboxypeptidase 2-like, partial [Hyalella azteca]	-	-	-	-	-	-	-
ncbi_113805749	2	5.28E-35	7.08E-34	--	PREDICTED: nuclear RNA export factor 1-like [Hyalella azteca]	Genetic Information Processing;Human Diseases;Human Diseases;Genetic Information Processing;Genetic Information Processing	Translation;Infectious diseases;Infectious diseases;Translation;Translation	ko03013//RNA transport;ko05164//Influenza A;ko05168//Herpes simplex infection;ko03015//mRNA surveillance pathway;ko03008//Ribosome biogenesis in eukaryotes	K14284;K14284;K14284;K14284;K14284	-	-	-
ncbi_113805752	1	1.58E-46	2.51E-45	DERP3	serine protease [Fenneropenaeus chinensis]	-	-	-	-	-	-	-
ncbi_113805780	2	1.43E-10	1.04E-09	tfip11	PREDICTED: tuftelin-interacting protein 11-like [Hyalella azteca]	-	-	-	-	-	-	-
ncbi_113805775	2	8.14E-60	1.54E-58	CG7506	PREDICTED: transmembrane protein 70 homolog, mitochondrial-like [Hyalella azteca]	-	-	-	-	-	-	-
ncbi_113805783	2	1.26E-17	1.18E-16	--	PREDICTED: brain protein I3 [Tribolium castaneum]	-	-	-	-	-	-	-
ncbi_113805784	3	0	0	--	hypothetical protein [Scylla paramamosain]	-	-	-	-	-	-	-
ncbi_113805786	2	1.13E-35	1.53E-34	Ddx52	ATP-dependent RNA helicase DDX52 [Daphnia magna]	-	-	-	-	-	-	-
ncbi_113805787	1	1.46E-24	1.63E-23	selenbp1	Selenium-binding protein 1-A [Zootermopsis nevadensis]	-	-	-	-	GO:0043231//intracellular membrane-bounded organelle;GO:0044444//cytoplasmic part	GO:0005488//binding	GO:0008104//protein localization;GO:0051234//establishment of localization
ncbi_113805822	3	7.84E-28	9.39E-27	CSGALNACT2	Chondroitin sulfate N-acetylgalactosaminyltransferase 2, partial [Stegodyphus mimosarum]	Metabolism;Metabolism	Global and overview maps;Glycan biosynthesis and metabolism	ko01100//Metabolic pathways;ko00532//Glycosaminoglycan biosynthesis - chondroitin sulfate / dermatan sulfate	K00746;K00746	-	-	-
ncbi_113805824	2	5.03E-247	2.53E-245	usp106	Putative RNA-binding protein Luc7-like 2 [Zootermopsis nevadensis]	-	-	-	-	-	-	-
ncbi_113805829	2	0	0	RpS26	PREDICTED: 40S ribosomal protein S26-like [Hyalella azteca]	Genetic Information Processing	Translation	ko03010//Ribosome	K02976	-	-	-
ncbi_113805842	4	1.97E-160	7.47E-159	Cdc42	cell division control protein 42 [Marsupenaeus japonicus]	Human Diseases;Human Diseases;Cellular Processes;Human Diseases;Cellular Processes;Cellular Processes;Cellular Processes;Environmental Information Processing;Cellular Processes;Human Diseases;Human Diseases;Human Diseases;Human Diseases;Environmental Information Processing;Human Diseases;Environmental Information Processing;Human Diseases;Organismal Systems;Organismal Systems;Organismal Systems;O…	Cancers;Infectious diseases;Cellular community - eukaryotes;Cancers;Cell motility;Cellular community - eukaryotes;Transport and catabolism;Signal transduction;Cellular community - eukaryotes;Infectious diseases;Infectious diseases;Infectious diseases;Infectious diseases;Signal transduction;Cancers;Signal transduction;Endocrine and metabolic diseases;Immune system;Immune system;Development;Immune …	ko05200//Pathways in cancer;ko05165//Human papillomavirus infection;ko04510//Focal adhesion;ko05205//Proteoglycans in cancer;ko04810//Regulation of actin cytoskeleton;ko04530//Tight junction;ko04144//Endocytosis;ko04015//Rap1 signaling pathway;ko04520//Adherens junction;ko05130//Pathogenic Escherichia coli infection;ko05131//Shigellosis;ko05132//Salmonella infection;ko05100//Bacterial invasion of…	K04393;K04393;K04393;K04393;K04393;K04393;K04393;K04393;K04393;K04393;K04393;K04393;K04393;K04393;K04393;K04393;K04393;K04393;K04393;K04393;K04393;K04393;K04393;K04393;K04393;K04393;K04393;K04393;K04393	-	-	-
ncbi_113805843	3	6.21E-15	5.36E-14	Igfbp7	insulin-like growth-factor binding protein [Sagmariasus verreauxi]	-	-	-	-	-	-	-
ncbi_113805854	2	0	0	blw	mitochondrial ATP synthase subunit alpha precursor [Litopenaeus vannamei]	Metabolism;Organismal Systems;Human Diseases;Human Diseases;Human Diseases;Metabolism	Global and overview maps;Environmental adaptation;Neurodegenerative diseases;Neurodegenerative diseases;Neurodegenerative diseases;Energy metabolism	ko01100//Metabolic pathways;ko04714//Thermogenesis;ko05016//Huntington disease;ko05010//Alzheimer disease;ko05012//Parkinson disease;ko00190//Oxidative phosphorylation	K02132;K02132;K02132;K02132;K02132;K02132	GO:0033178//proton-transporting two-sector ATPase complex, catalytic domain	GO:0015078//hydrogen ion transmembrane transporter activity;GO:0019829//cation-transporting ATPase activity;GO:0032550//purine ribonucleoside binding	GO:0006754//ATP biosynthetic process;GO:0015988//energy coupled proton transmembrane transport, against electrochemical gradient
ncbi_113805910	1	1.66E-27	1.97E-26	--	CruI-1 [Marsupenaeus japonicus]	-	-	-	-	-	-	-
ncbi_113805878	2	0	0	RpL19	60S Ribosomal Protein L19 [Pantala flavescens]	Genetic Information Processing	Translation	ko03010//Ribosome	K02885	GO:0030529//intracellular ribonucleoprotein complex	-	GO:0010467//gene expression
ncbi_113805880	4	1.84E-11	1.40E-10	Dmap1	PREDICTED: DNA methyltransferase 1-associated protein 1-like [Hyalella azteca]	-	-	-	-	-	-	-
ncbi_113805860	2	4.45E-18	4.21E-17	WDR61	PREDICTED: WD repeat-containing protein 61-like [Hyalella azteca]	Genetic Information Processing	Folding, sorting and degradation	ko03018//RNA degradation	K12602	-	-	-
ncbi_113805893	4	4.45E-17	4.08E-16	MLLT3	PREDICTED: serine/arginine repetitive matrix protein 2-like isoform X2 [Hyalella azteca]	Human Diseases	Cancers	ko05202//Transcriptional misregulation in cancers	K15187	-	-	-
ncbi_113805894	4	6.51E-10	4.64E-09	Mitd1	PREDICTED: MIT domain-containing protein 1 [Nothobranchius furzeri]	-	-	-	-	-	-	-
ncbi_113805895	2	4.25E-253	2.17E-251	--	PREDICTED: nucleolar transcription factor 1 [Tribolium castaneum]	-	-	-	-	-	-	-
ncbi_113805896	4	1.27E-17	1.19E-16	leng8	Leukocyte receptor cluster member 8 like protein [Cyphomyrmex costatus]	-	-	-	-	-	-	-
ncbi_113805902	2	1.29E-08	8.65E-08	--	PREDICTED: uncharacterized protein LOC102808949 [Saccoglossus kowalevskii]	-	-	-	-	-	-	-
ncbi_113805869	2	1.41E-48	2.30E-47	PINX1	Pinx1, partial [Litopenaeus vannamei]	-	-	-	-	-	-	-
ncbi_113805907	4	2.75E-16	2.47E-15	snf8	Vacuolar-sorting protein SNF8 [Zootermopsis nevadensis]	Cellular Processes	Transport and catabolism	ko04144//Endocytosis	K12188	-	-	-
ncbi_113805905	2	0	0	Non1	PREDICTED: probable nucleolar GTP-binding protein 1 [Bombus terrestris]	Genetic Information Processing	Translation	ko03008//Ribosome biogenesis in eukaryotes	K06943	GO:0043231//intracellular membrane-bounded organelle	-	-
ncbi_113805915	2	9.89E-37	1.36E-35	Cdc123	PREDICTED: cell division cycle protein 123 homolog [Hyalella azteca]	-	-	-	-	-	-	-
ncbi_113805918	5	1.02E-11	7.85E-11	POLR3H	PREDICTED: DNA-directed RNA polymerase III subunit RPC8-like [Limulus polyphemus]	Metabolism;Metabolism;Human Diseases;Metabolism;Genetic Information Processing;Organismal Systems	Global and overview maps;Nucleotide metabolism;Infectious diseases;Nucleotide metabolism;Transcription;Immune system	ko01100//Metabolic pathways;ko00230//Purine metabolism;ko05169//Epstein-Barr virus infection;ko00240//Pyrimidine metabolism;ko03020//RNA polymerase;ko04623//Cytosolic DNA-sensing pathway	K03022;K03022;K03022;K03022;K03022;K03022	GO:0005654//nucleoplasm	-	GO:0006351//transcription, DNA-templated
ncbi_113805927	4	0	0	Manf	mesencephalic astrocyte-derived neurotrophic factor-like protein [Lasius niger]	-	-	-	-	-	-	-
ncbi_113805923	4	2.24E-104	6.17E-103	SRRM1	PREDICTED: serine/arginine repetitive matrix protein 1 isoform X2 [Halyomorpha halys]	Genetic Information Processing;Genetic Information Processing	Translation;Translation	ko03013//RNA transport;ko03015//mRNA surveillance pathway	K13171;K13171	-	-	-
ncbi_113805928	2	5.47E-62	1.06E-60	Mrpl14	mitochondrial ribosomal protein L14 [Anopheles darlingi]	Genetic Information Processing	Translation	ko03010//Ribosome	K02874	GO:0000315//organellar large ribosomal subunit	GO:0005198//structural molecule activity	GO:0010467//gene expression
ncbi_113805931	5	1.92E-16	1.73E-15	--	-	-	-	-	-	-	-	-
ncbi_113805950	3	2.11E-135	7.05E-134	GRN	PREDICTED: granulins-like isoform X2 [Ciona intestinalis]	-	-	-	-	-	-	-
ncbi_113805953	2	2.62E-13	2.14E-12	beg	Malonyl-CoA-acyl carrier protein transacylase, mitochondrial [Daphnia magna]	Metabolism;Metabolism;Metabolism	Global and overview maps;Global and overview maps;Lipid metabolism	ko01100//Metabolic pathways;ko01212//Fatty acid metabolism;ko00061//Fatty acid biosynthesis	K00645;K00645;K00645	-	-	-
ncbi_113805954	5	8.05E-195	3.43E-193	slc16a10	PREDICTED: monocarboxylate transporter 10-like [Hyalella azteca]	Organismal Systems;Organismal Systems	Endocrine system;Digestive system	ko04919//Thyroid hormone signaling pathway;ko04974//Protein digestion and absorption	K08187;K08187	-	-	-
ncbi_113805977	2	4.44E-105	1.23E-103	DNAJA1	heat shock protein 40 [Marsupenaeus japonicus]	Genetic Information Processing	Folding, sorting and degradation	ko04141//Protein processing in endoplasmic reticulum	K09502	GO:0031988//membrane-bounded vesicle;GO:0044444//cytoplasmic part	GO:0031072//heat shock protein binding;GO:0032550//purine ribonucleoside binding;GO:0043169//cation binding;GO:0044389//ubiquitin-like protein ligase binding;GO:0070325//lipoprotein particle receptor binding	GO:0006950//response to stress;GO:0015031//protein transport;GO:0030518//intracellular steroid hormone receptor signaling pathway;GO:0031396//regulation of protein ubiquitination;GO:0033365//protein localization to organelle;GO:0042981//regulation of apoptotic process;GO:0043407//negative regulation of MAP kinase activity;GO:0048232//male gamete generation;GO:0048870//cell motility
ncbi_113805978	2	0	0	nop16	PREDICTED: nucleolar protein 16-like [Lingula anatina]	-	-	-	-	-	-	-
ncbi_113805980	3	3.76E-37	5.23E-36	--	CG2206-PB-like protein [Daphnia pulex]	-	-	-	-	-	-	-
ncbi_113805964	3	1.48E-47	2.38E-46	Fam43a	Protein FAM43A, partial [Stegodyphus mimosarum]	-	-	-	-	-	-	-
ncbi_113806001	2	7.24E-43	1.09E-41	--	PREDICTED: heat shock protein 67B2-like [Hyalella azteca]	-	-	-	-	-	-	-
ncbi_113806004	5	1.64E-11	1.25E-10	CLINT1	Clathrin interactor 1 [Camponotus floridanus]	-	-	-	-	-	-	-
ncbi_113806006	2	2.61983590101608e-309	1.54E-307	Eif1a	PREDICTED: eukaryotic translation initiation factor 1A, Y-chromosomal-like [Hyalella azteca]	Genetic Information Processing	Translation	ko03013//RNA transport	K03236	-	-	-
ncbi_113805970	3	1.12E-36	1.55E-35	--	-	-	-	-	-	-	-	-
ncbi_113805971	5	7.25E-39	1.03E-37	--	-	-	-	-	-	-	-	-
ncbi_113806028	5	5.33E-203	2.34E-201	Fam13a	PREDICTED: protein FAM13A isoform X1 [Nicrophorus vespilloides]	-	-	-	-	-	-	-
ncbi_113806029	3	2.03E-11	1.54E-10	RIT1	GTP-binding protein Rit1 [Zootermopsis nevadensis]	-	-	-	-	-	-	-
ncbi_113806042	4	8.48E-255	4.36E-253	HSP90AA1	heat shock protein 90 [Eriocheir sinensis]	Human Diseases;Genetic Information Processing;Environmental Information Processing;Human Diseases;Cellular Processes;Human Diseases;Organismal Systems;Organismal Systems;Organismal Systems;Organismal Systems;Organismal Systems;Organismal Systems	Cancers;Folding, sorting and degradation;Signal transduction;Cardiovascular diseases;Cell growth and death;Cancers;Immune system;Endocrine system;Endocrine system;Immune system;Immune system;Immune system	ko05200//Pathways in cancer;ko04141//Protein processing in endoplasmic reticulum;ko04151//PI3K-Akt signaling pathway;ko05418//Fluid shear stress and atherosclerosis;ko04217//Necroptosis;ko05215//Prostate cancer;ko04621//NOD-like receptor signaling pathway;ko04914//Progesterone-mediated oocyte maturation;ko04915//Estrogen signaling pathway;ko04612//Antigen processing and presentation;ko04657//IL-1…	K04079;K04079;K04079;K04079;K04079;K04079;K04079;K04079;K04079;K04079;K04079;K04079	-	-	-
ncbi_113806043	4	0	0	HSP90AA1	heat shock protein 90 [Palaemon carinicauda]	Human Diseases;Genetic Information Processing;Environmental Information Processing;Human Diseases;Cellular Processes;Human Diseases;Organismal Systems;Organismal Systems;Organismal Systems;Organismal Systems;Organismal Systems;Organismal Systems	Cancers;Folding, sorting and degradation;Signal transduction;Cardiovascular diseases;Cell growth and death;Cancers;Immune system;Endocrine system;Endocrine system;Immune system;Immune system;Immune system	ko05200//Pathways in cancer;ko04141//Protein processing in endoplasmic reticulum;ko04151//PI3K-Akt signaling pathway;ko05418//Fluid shear stress and atherosclerosis;ko04217//Necroptosis;ko05215//Prostate cancer;ko04621//NOD-like receptor signaling pathway;ko04914//Progesterone-mediated oocyte maturation;ko04915//Estrogen signaling pathway;ko04612//Antigen processing and presentation;ko04657//IL-1…	K04079;K04079;K04079;K04079;K04079;K04079;K04079;K04079;K04079;K04079;K04079;K04079	-	-	-
ncbi_113806056	2	7.61E-16	6.75E-15	ATIC	PREDICTED: bifunctional purine biosynthesis protein PURH [Musca domestica]	Metabolism;Metabolism;Human Diseases;Metabolism	Global and overview maps;Nucleotide metabolism;Drug resistance;Metabolism of cofactors and vitamins	ko01100//Metabolic pathways;ko00230//Purine metabolism;ko01523//Antifolate resistance;ko00670//One carbon pool by folate	K00602;K00602;K00602;K00602	-	GO:0016742//hydroxymethyl-, formyl- and related transferase activity;GO:0019238//cyclohydrolase activity	GO:0006163//purine nucleotide metabolic process
ncbi_113806058	5	3.85E-12	3.01E-11	GID4	PREDICTED: glucose-induced degradation protein 4 homolog [Parasteatoda tepidariorum]	-	-	-	-	-	-	-
ncbi_113806060	4	1.51E-95	3.88E-94	ntf2	PREDICTED: probable nuclear transport factor 2 [Hyalella azteca]	-	-	-	-	-	-	-
ncbi_113806063	1	1.47E-08	9.85E-08	Rnf38	PREDICTED: RING finger protein 44-like [Hyalella azteca]	-	-	-	-	-	-	-
ncbi_113806066	4	4.81E-59	9.02E-58	nudt21	PREDICTED: cleavage and polyadenylation specificity factor subunit 5 [Stomoxys calcitrans]	Genetic Information Processing	Translation	ko03015//mRNA surveillance pathway	K14397	GO:0043234//protein complex	GO:0003824//catalytic activity	GO:0031124//mRNA 3'-end processing
ncbi_113806070	3	2.05E-22	2.17E-21	--	mitogen-activated protein kinase kinase 3 [Fenneropenaeus chinensis]	-	-	-	-	-	-	-
ncbi_113806071	2	1.61E-16	1.46E-15	St13	PREDICTED: hsc70-interacting protein isoform X2 [Trichechus manatus latirostris]	-	-	-	-	-	-	-
ncbi_113806074	2	1.29E-228	6.09E-227	Mlc-c	myosin essential light chain [Eriocheir sinensis]	Cellular Processes;Organismal Systems;Organismal Systems	Cellular community - eukaryotes;Endocrine system;Circulatory system	ko04530//Tight junction;ko04921//Oxytocin signaling pathway;ko04270//Vascular smooth muscle contraction	K12751;K12751;K12751	-	GO:0016628//oxidoreductase activity, acting on the CH-CH group of donors, NAD or NADP as acceptor	GO:0044710//single-organism metabolic process
ncbi_113806076	3	2.73E-72	5.86E-71	TUBB4B	beta-II tubulin [Homarus americanus]	Cellular Processes;Human Diseases;Cellular Processes	Transport and catabolism;Infectious diseases;Cellular community - eukaryotes	ko04145//Phagosome;ko05130//Pathogenic Escherichia coli infection;ko04540//Gap junction	K07375;K07375;K07375	GO:0015630//microtubule cytoskeleton;GO:0032991//macromolecular complex	GO:0005198//structural molecule activity;GO:0017111//nucleoside-triphosphatase activity;GO:0032550//purine ribonucleoside binding	GO:0043623//cellular protein complex assembly;GO:0044763//single-organism cellular process
ncbi_113806075	3	6.02E-18	5.68E-17	Kiaa0513	hypothetical protein L798_07495 [Zootermopsis nevadensis]	-	-	-	-	-	-	-
ncbi_113806080	5	3.26E-09	2.26E-08	--	PREDICTED: docking protein 2-like [Hyalella azteca]	-	-	-	-	-	-	-
ncbi_113806082	2	1.96E-12	1.55E-11	--	PREDICTED: TATA box-binding protein-associated factor RNA polymerase I subunit B [Dinoponera quadriceps]	-	-	-	-	-	-	-
ncbi_113806100	3	3.02E-43	4.55E-42	--	PREDICTED: uncharacterized protein LOC108666374 [Hyalella azteca]	-	-	-	-	-	-	-
ncbi_113806109	4	8.15E-22	8.53E-21	eral1	GTPase Era, mitochondrial [Daphnia magna]	-	-	-	-	-	-	-
ncbi_113806121	2	2.52E-27	2.98E-26	AGPS	Alkyldihydroxyacetonephosphate synthase, peroxisomal [Orchesella cincta]	Metabolism;Cellular Processes;Metabolism	Global and overview maps;Transport and catabolism;Lipid metabolism	ko01100//Metabolic pathways;ko04146//Peroxisome;ko00565//Ether lipid metabolism	K00803;K00803;K00803	-	GO:0016614//oxidoreductase activity, acting on CH-OH group of donors;GO:0016740//transferase activity	GO:0044710//single-organism metabolic process
ncbi_113806125	2	1.37E-45	2.14E-44	Tsr3	Ribosome biogenesis protein TSR3 [Daphnia magna]	-	-	-	-	-	-	-
ncbi_113806131	3	9.94E-50	1.66E-48	Rel	relish [Litopenaeus vannamei]	Human Diseases;Human Diseases;Environmental Information Processing;Cellular Processes;Human Diseases;Human Diseases;Human Diseases;Human Diseases;Human Diseases;Human Diseases;Human Diseases;Environmental Information Processing;Environmental Information Processing;Human Diseases;Environmental Information Processing;Human Diseases;Human Diseases;Environmental Information Processing;Human Diseases;…	Cancers;Infectious diseases;Signal transduction;Cell growth and death;Infectious diseases;Infectious diseases;Cancers;Cardiovascular diseases;Infectious diseases;Cancers;Infectious diseases;Signal transduction;Signal transduction;Cancers;Signal transduction;Infectious diseases;Endocrine and metabolic diseases;Signal transduction;Infectious diseases;Immune system;Cell growth and death;Infectious d…	ko05200//Pathways in cancer;ko05165//Human papillomavirus infection;ko04151//PI3K-Akt signaling pathway;ko04210//Apoptosis;ko05164//Influenza A;ko05166//HTLV-I infection;ko05202//Transcriptional misregulation in cancers;ko05418//Fluid shear stress and atherosclerosis;ko05131//Shigellosis;ko05206//MicroRNAs in cancer;ko05132//Salmonella infection;ko04010//MAPK signaling pathway;ko04024//cAMP signa…	K02580;K02580;K02580;K02580;K02580;K02580;K02580;K02580;K02580;K02580;K02580;K02580;K02580;K02580;K02580;K02580;K02580;K02580;K02580;K02580;K02580;K02580;K02580;K02580;K02580;K02580;K02580;K02580;K02580;K02580;K02580;K02580;K02580;K02580;K02580;K02580;K02580;K02580;K02580;K02580;K02580;K02580;K02580;K02580;K02580;K02580;K02580;K02580;K02580;K02580;K02580;K02580;K02580;K02580;K02580;K02580;K02580;…	-	-	-
ncbi_113806139	5	7.41E-213	3.33E-211	Parp14	PREDICTED: poly [ADP-ribose] polymerase 12-like [Ictalurus punctatus]	-	-	-	-	-	-	-
ncbi_113806187	2	0	0	PFDN5	PREDICTED: prefoldin subunit 5-like [Hyalella azteca]	-	-	-	-	-	-	-
ncbi_113806189	2	2.24E-15	1.95E-14	PFDN5	PREDICTED: prefoldin subunit 5-like [Hyalella azteca]	-	-	-	-	-	-	-
ncbi_113806193	2	4.84E-52	8.28E-51	MRPS5	28S ribosomal protein S5, mitochondrial [Zootermopsis nevadensis]	Genetic Information Processing	Translation	ko03010//Ribosome	K02988	GO:0030529//intracellular ribonucleoprotein complex	-	-
ncbi_113806196	2	3.89E-24	4.29E-23	Grhpr	Glyoxylate reductase/hydroxypyruvate reductase [Daphnia magna]	Metabolism;Metabolism;Metabolism;Metabolism	Global and overview maps;Amino acid metabolism;Carbohydrate metabolism;Carbohydrate metabolism	ko01100//Metabolic pathways;ko00260//Glycine, serine and threonine metabolism;ko00620//Pyruvate metabolism;ko00630//Glyoxylate and dicarboxylate metabolism	K00049;K00049;K00049;K00049	-	GO:0016616//oxidoreductase activity, acting on the CH-OH group of donors, NAD or NADP as acceptor	-
ncbi_113806205	2	1.38E-29	1.70E-28	CG32736	PREDICTED: small integral membrane protein 4 [Nicrophorus vespilloides]	-	-	-	-	-	-	-
ncbi_113806207	2	7.24E-287	4.05E-285	Psma1	PREDICTED: proteasome subunit alpha type-1-like [Hyalella azteca]	Genetic Information Processing	Folding, sorting and degradation	ko03050//Proteasome	K02725	-	-	-
ncbi_113806229	1	1.40E-50	2.36E-49	Chst1	PREDICTED: carbohydrate sulfotransferase 1-like [Limulus polyphemus]	Metabolism	Glycan biosynthesis and metabolism	ko00533//Glycosaminoglycan biosynthesis - keratan sulfate	K01022	-	-	-
ncbi_113806222	1	1.91E-145	6.78E-144	FCN1	PREDICTED: ficolin-1-like [Strongylocentrotus purpuratus]	Human Diseases;Cellular Processes;Environmental Information Processing;Human Diseases;Environmental Information Processing	Infectious diseases;Cellular community - eukaryotes;Signal transduction;Cancers;Signaling molecules and interaction	ko05165//Human papillomavirus infection;ko04510//Focal adhesion;ko04151//PI3K-Akt signaling pathway;ko05206//MicroRNAs in cancer;ko04512//ECM-receptor interaction	K06252;K06252;K06252;K06252;K06252	GO:0031981//nuclear lumen	GO:0005488//binding	GO:0010646//regulation of cell communication;GO:0022610//biological adhesion;GO:0023051//regulation of signaling;GO:0044700//single organism signaling;GO:0048523//negative regulation of cellular process;GO:0048812//neuron projection morphogenesis
ncbi_113806223	4	4.27E-263	2.26E-261	CG3792	Mannose-P-dolichol utilization defect 1 protein [Anoplophora glabripennis]	-	-	-	-	-	-	-
ncbi_113806245	2	2.02E-45	3.15E-44	--	-	-	-	-	-	-	-	-
ncbi_113806262	2	3.29E-124	1.02E-122	T05H10.6	PREDICTED: LOW QUALITY PROTEIN: probable pyruvate dehydrogenase E1 component subunit alpha, mitochondrial [Hyalella azteca]	Metabolism;Metabolism;Metabolism;Environmental Information Processing;Organismal Systems;Human Diseases;Metabolism;Metabolism	Global and overview maps;Global and overview maps;Carbohydrate metabolism;Signal transduction;Endocrine system;Cancers;Carbohydrate metabolism;Carbohydrate metabolism	ko01100//Metabolic pathways;ko01200//Carbon metabolism;ko00010//Glycolysis / Gluconeogenesis;ko04066//HIF-1 signaling pathway;ko04922//Glucagon signaling pathway;ko05230//Central carbon metabolism in cancer;ko00020//Citrate cycle (TCA cycle);ko00620//Pyruvate metabolism	K00161;K00161;K00161;K00161;K00161;K00161;K00161;K00161	-	-	-
ncbi_113806265	2	1.94E-12	1.53E-11	Tlet_1011	PREDICTED: probable transcriptional regulatory protein Pmob_0807 [Nicrophorus vespilloides]	-	-	-	-	-	-	-
ncbi_113806266	2	6.08E-229	2.89E-227	SmF	PREDICTED: small nuclear ribonucleoprotein F-like [Hyalella azteca]	Genetic Information Processing	Transcription	ko03040//Spliceosome	K11098	GO:0030529//intracellular ribonucleoprotein complex;GO:0043231//intracellular membrane-bounded organelle;GO:0044423//virion part	-	GO:0006396//RNA processing
ncbi_113806281	2	0	0	RpL17	PREDICTED: 60S ribosomal protein L17 [Halyomorpha halys]	Genetic Information Processing	Translation	ko03010//Ribosome	K02880	GO:0044391//ribosomal subunit	-	GO:0010467//gene expression
ncbi_113806282	2	3.19E-10	2.31E-09	--	-	-	-	-	-	-	-	-
ncbi_113806284	4	2.14E-23	2.32E-22	Dyrk2	PREDICTED: dual specificity tyrosine-phosphorylation-regulated kinase 1A-like isoform X3 [Branchiostoma belcheri]	-	-	-	-	-	-	-
ncbi_113806303	2	0	0	--	PREDICTED: glioma tumor suppressor candidate region gene 2 protein-like isoform X1 [Limulus polyphemus]	Human Diseases	Infectious diseases	ko05168//Herpes simplex infection	K14840	-	-	-
ncbi_113806285	2	1.67E-42	2.50E-41	ccdc124	Coiled-coil domain-containing protein 124 [Caligus clemensi]	-	-	-	-	GO:0044424//intracellular part	-	-
ncbi_113806288	1	8.46E-153	3.11E-151	SERPINB1	serine proteinase inhibitor 7 [Litopenaeus vannamei]	Human Diseases	Infectious diseases	ko05146//Amoebiasis	K13963	-	-	-
ncbi_113806289	1	8.47E-21	8.58E-20	SERPINB1	serpin8 [Litopenaeus vannamei]	-	-	-	-	-	-	-
ncbi_113806293	4	4.83E-11	3.60E-10	--	-	-	-	-	-	-	-	-
ncbi_113806294	3	6.40E-298	3.64E-296	Glo1	PREDICTED: lactoylglutathione lyase [Crassostrea gigas]	Metabolism	Carbohydrate metabolism	ko00620//Pyruvate metabolism	K01759	GO:0031988//membrane-bounded vesicle	GO:0016846//carbon-sulfur lyase activity;GO:0046914//transition metal ion binding	GO:0002573//myeloid leukocyte differentiation;GO:0006081//cellular aldehyde metabolic process;GO:0006355//regulation of transcription, DNA-templated;GO:0006790//sulfur compound metabolic process;GO:0042981//regulation of apoptotic process
ncbi_113806311	3	8.68E-83	2.04E-81	--	Kunitz-type serine protease inhibitor [Fenneropenaeus chinensis]	-	-	-	-	-	GO:0030414//peptidase inhibitor activity	GO:0010466//negative regulation of peptidase activity
ncbi_113806309	5	1.84E-14	1.56E-13	Gtpbp2	PREDICTED: GTP-binding protein 2-like [Hyalella azteca]	-	-	-	-	-	-	-
ncbi_113806310	4	1.21E-19	1.19E-18	Clp	PREDICTED: cleavage and polyadenylation specificity factor subunit 4-like [Hyalella azteca]	Human Diseases;Genetic Information Processing	Infectious diseases;Translation	ko05164//Influenza A;ko03015//mRNA surveillance pathway	K14404;K14404	-	-	-
ncbi_113806313	3	9.35E-10	6.63E-09	DUS4L	PREDICTED: tRNA-dihydrouridine(20a/20b) synthase [NAD(P)+]-like isoform X3 [Lepisosteus oculatus]	-	-	-	-	-	GO:0000166//nucleotide binding;GO:0016627//oxidoreductase activity, acting on the CH-CH group of donors	GO:0006399//tRNA metabolic process;GO:0044710//single-organism metabolic process
ncbi_113806314	3	5.65E-34	7.49E-33	Nfat5	PREDICTED: nuclear factor of activated T-cells 5 isoform X1 [Agrilus planipennis]	-	-	-	-	-	-	-
ncbi_113806321	4	4.22E-21	4.31E-20	--	PREDICTED: growth arrest and DNA damage-inducible proteins-interacting protein 1 [Bombyx mori]	-	-	-	-	-	-	-
ncbi_113806326	2	3.21E-63	6.32E-62	--	-	-	-	-	-	-	-	-
ncbi_113806334	2	3.75E-113	1.10E-111	--	PREDICTED: WD repeat-containing protein 18-like isoform X2 [Hyalella azteca]	-	-	-	-	-	-	-
ncbi_113806335	4	1.30E-39	1.87E-38	--	Carboxyl-ester lipase [Daphnia magna]	-	-	-	-	-	-	-
ncbi_113806337	2	1.81E-45	2.81E-44	DDX47	PREDICTED: probable ATP-dependent RNA helicase DDX47 isoform X1 [Amyelois transitella]	-	-	-	-	-	GO:0017111//nucleoside-triphosphatase activity;GO:0032550//purine ribonucleoside binding	-
ncbi_113806392	2	4.68E-09	3.22E-08	--	AGAP001817-PA [Anopheles gambiae str. PEST] [Anopheles gambiae]	-	-	-	-	-	-	-
ncbi_113806389	2	6.24E-151	2.27E-149	RTRAF	PREDICTED: UPF0568 protein C14orf166 homolog isoform X1 [Hyalella azteca]	-	-	-	-	-	-	-
ncbi_113806393	4	5.30E-21	5.40E-20	--	-	-	-	-	-	-	-	-
ncbi_113806395	2	8.75E-30	1.08E-28	--	-	-	-	-	-	-	-	-
ncbi_113806429	3	1.05E-12	8.40E-12	ATP8A2	PREDICTED: probable phospholipid-transporting ATPase IA, partial [Acanthisitta chloris]	-	-	-	-	-	-	-
ncbi_113806425	4	6.26E-49	1.03E-47	--	-	-	-	-	-	-	-	-
ncbi_113806432	3	2.19E-18	2.09E-17	--	-	-	-	-	-	-	-	-
ncbi_113806437	2	0	0	RPS27	40S ribosomal protein S27E [Homarus americanus]	Genetic Information Processing	Translation	ko03010//Ribosome	K02978	-	-	-
ncbi_113806443	4	4.57E-20	4.56E-19	ZFAND6	PREDICTED: AN1-type zinc finger protein 6 [Neodiprion lecontei]	-	-	-	-	-	-	-
ncbi_113806448	1	1.54E-171	6.05E-170	--	PREDICTED: heme-binding protein 2-like [Hyalella azteca]	-	-	-	-	-	-	-
ncbi_113806461	1	8.20E-13	6.57E-12	--	-	-	-	-	-	-	-	-
ncbi_113806460	1	3.49E-17	3.21E-16	mgat4b	Alpha-1,3-mannosyl-glycoprotein 4-beta-N-acetylglucosaminyltransferase B [Zootermopsis nevadensis]	Metabolism;Metabolism	Global and overview maps;Glycan biosynthesis and metabolism	ko01100//Metabolic pathways;ko00510//N-Glycan biosynthesis	K00738;K00738	-	-	-
ncbi_113806470	5	1.71E-12	1.36E-11	GlcAT-P	PREDICTED: galactosylgalactosylxylosylprotein 3-beta-glucuronosyltransferase P [Microplitis demolitor]	-	-	-	-	-	-	-
ncbi_113806492	3	8.54E-09	5.79E-08	Pu	PREDICTED: GTP cyclohydrolase 1-like [Hyalella azteca]	Metabolism;Metabolism	Global and overview maps;Metabolism of cofactors and vitamins	ko01100//Metabolic pathways;ko00790//Folate biosynthesis	K01495;K01495	GO:0044424//intracellular part	GO:0003824//catalytic activity	GO:0009396//folic acid-containing compound biosynthetic process
ncbi_113806503	4	1.19E-124	3.70E-123	Pex3	Peroxisomal biogenesis factor 3 [Zootermopsis nevadensis]	Cellular Processes	Transport and catabolism	ko04146//Peroxisome	K13336	GO:0043231//intracellular membrane-bounded organelle	-	-
ncbi_113806502	4	1.74E-52	3.00E-51	larp7	La-related protein 7 [Dufourea novaeangliae]	-	-	-	-	-	-	-
ncbi_113806506	3	5.96E-135	1.98E-133	--	-	-	-	-	-	-	-	-
ncbi_113806514	4	5.75E-24	6.33E-23	DHFR	PREDICTED: dihydrofolate reductase-like isoform X1 [Lingula anatina]	Metabolism;Metabolism;Human Diseases;Metabolism	Global and overview maps;Metabolism of cofactors and vitamins;Drug resistance;Metabolism of cofactors and vitamins	ko01100//Metabolic pathways;ko00790//Folate biosynthesis;ko01523//Antifolate resistance;ko00670//One carbon pool by folate	K00287;K00287;K00287;K00287	-	-	GO:0044710//single-organism metabolic process
ncbi_113806516	2	4.50E-12	3.50E-11	tfb1m	Dimethyladenosine transferase 1, mitochondrial [Zootermopsis nevadensis]	-	-	-	-	-	GO:0008173//RNA methyltransferase activity	GO:0006364//rRNA processing
ncbi_113806518	1	7.71E-16	6.83E-15	--	-	-	-	-	-	-	-	-
ncbi_113806522	1	3.43E-123	1.06E-121	Xpr1	Xenotropic and polytropic retrovirus receptor 1-like protein [Zootermopsis nevadensis]	-	-	-	-	-	-	-
ncbi_113806546	1	2.79E-21	2.87E-20	ssh	protein phosphatase slingshot [Lasius niger]	Cellular Processes;Organismal Systems	Cell motility;Development	ko04810//Regulation of actin cytoskeleton;ko04360//Axon guidance	K05766;K05766	-	-	-
ncbi_113806547	2	2.42E-12	1.90E-11	DCTN4	PREDICTED: dynactin subunit 4-like [Hyalella azteca]	Human Diseases;Organismal Systems	Neurodegenerative diseases;Excretory system	ko05016//Huntington disease;ko04962//Vasopressin-regulated water reabsorption	K10426;K10426	-	-	-
ncbi_113806548	3	4.31E-23	4.63E-22	--	-	-	-	-	-	-	-	-
ncbi_113806580	2	7.39E-60	1.40E-58	Ppid	PREDICTED: peptidyl-prolyl cis-trans isomerase D [Cynoglossus semilaevis]	Cellular Processes;Cellular Processes	Cell growth and death;Cell growth and death	ko04217//Necroptosis;ko04218//Cellular senescence	K05864;K05864	-	GO:0016853//isomerase activity	-
ncbi_113806622	3	3.18E-13	2.59E-12	--	PREDICTED: HIG1 domain family member 1A, mitochondrial [Bombyx mori]	-	-	-	-	-	-	-
ncbi_113806625	2	2.42E-11	1.83E-10	Nup43	Nucleoporin Nup43 [Caligus clemensi]	Genetic Information Processing	Translation	ko03013//RNA transport	K14305	-	-	-
ncbi_113806630	4	1.74E-129	5.55E-128	MBD4	PREDICTED: methyl-CpG-binding domain protein 4-like [Hyalella azteca]	Genetic Information Processing	Replication and repair	ko03410//Base excision repair	K10801	-	-	GO:0006281//DNA repair
ncbi_113806632	5	2.46E-15	2.14E-14	ave	PREDICTED: protein aveugle-like [Hyalella azteca]	-	-	-	-	-	-	-
ncbi_113806634	4	2.61E-24	2.89E-23	--	Polyadenylate-binding protein, cytoplasmic and nuclear [Exaiptasia pallida]	-	-	-	-	-	-	-
ncbi_113806635	2	7.90E-122	2.41E-120	--	-	-	-	-	-	-	-	-
ncbi_113806657	3	2.82E-20	2.83E-19	FLI1	PREDICTED: transcriptional regulator ERG homolog [Hyalella azteca]	Human Diseases	Cancers	ko05202//Transcriptional misregulation in cancers	K09436	-	-	-
ncbi_113806640	1	2.51E-14	2.12E-13	--	PREDICTED: uncharacterized protein LOC108675836 [Hyalella azteca]	-	-	-	-	-	-	-
ncbi_113806641	4	5.84E-49	9.61E-48	DERL1	PREDICTED: derlin-1-like [Hyalella azteca]	Genetic Information Processing;Human Diseases	Folding, sorting and degradation;Neurodegenerative diseases	ko04141//Protein processing in endoplasmic reticulum;ko05014//Amyotrophic lateral sclerosis (ALS)	K11519;K11519	-	-	-
ncbi_113806642	4	6.88E-36	9.36E-35	Tusc3	PREDICTED: tumor suppressor candidate 3-like [Hyalella azteca]	Metabolism;Genetic Information Processing;Metabolism	Global and overview maps;Folding, sorting and degradation;Glycan biosynthesis and metabolism	ko01100//Metabolic pathways;ko04141//Protein processing in endoplasmic reticulum;ko00510//N-Glycan biosynthesis	K12669;K12669;K12669	-	-	-
ncbi_113806643	3	1.00E-37	1.40E-36	SPR	PREDICTED: sepiapterin reductase-like [Hyalella azteca]	Metabolism;Metabolism	Global and overview maps;Metabolism of cofactors and vitamins	ko01100//Metabolic pathways;ko00790//Folate biosynthesis	K00072;K00072	-	-	GO:0006725//cellular aromatic compound metabolic process;GO:0044699//single-organism process;GO:0046483//heterocycle metabolic process;GO:1901360//organic cyclic compound metabolic process;GO:1901564//organonitrogen compound metabolic process
ncbi_113806675	2	1.56E-24	1.74E-23	MRPL37	28S ribosomal protein S30, mitochondrial [Daphnia magna]	-	-	-	-	-	-	-
ncbi_113806677	2	1.55E-191	6.46E-190	porin	voltage-dependent anion-selective channel [Eriocheir sinensis]	Human Diseases;Human Diseases;Environmental Information Processing;Cellular Processes;Human Diseases;Environmental Information Processing;Cellular Processes;Organismal Systems;Organismal Systems;Cellular Processes	Neurodegenerative diseases;Infectious diseases;Signal transduction;Cell growth and death;Neurodegenerative diseases;Signal transduction;Cell growth and death;Immune system;Digestive system;Cell growth and death	ko05016//Huntington disease;ko05166//HTLV-I infection;ko04022//cGMP - PKG signaling pathway;ko04217//Necroptosis;ko05012//Parkinson disease;ko04020//Calcium signaling pathway;ko04218//Cellular senescence;ko04621//NOD-like receptor signaling pathway;ko04979//Cholesterol metabolism;ko04216//Ferroptosis	K15040;K15040;K15040;K15040;K15040;K15040;K15040;K15040;K15040;K15040	-	GO:0005244//voltage-gated ion channel activity	GO:0006820//anion transport;GO:0034765//regulation of ion transmembrane transport
ncbi_113806679	2	5.21E-53	9.05E-52	UQCRC2	PREDICTED: cytochrome b-c1 complex subunit 2, mitochondrial [Tribolium castaneum]	Metabolism;Organismal Systems;Human Diseases;Human Diseases;Human Diseases;Human Diseases;Metabolism;Organismal Systems	Global and overview maps;Environmental adaptation;Neurodegenerative diseases;Neurodegenerative diseases;Endocrine and metabolic diseases;Neurodegenerative diseases;Energy metabolism;Circulatory system	ko01100//Metabolic pathways;ko04714//Thermogenesis;ko05016//Huntington disease;ko05010//Alzheimer disease;ko04932//Non-alcoholic fatty liver disease (NAFLD);ko05012//Parkinson disease;ko00190//Oxidative phosphorylation;ko04260//Cardiac muscle contraction	K00415;K00415;K00415;K00415;K00415;K00415;K00415;K00415	-	-	-
ncbi_113806693	2	2.68E-27	3.16E-26	APIP	APAF1-interacting protein-like protein [Zootermopsis nevadensis]	Metabolism;Metabolism	Global and overview maps;Amino acid metabolism	ko01100//Metabolic pathways;ko00270//Cysteine and methionine metabolism	K08964;K08964	-	-	-
ncbi_113806697	1	1.60E-13	1.31E-12	Ethe1	PREDICTED: persulfide dioxygenase ETHE1, mitochondrial-like [Hyalella azteca]	Metabolism	Energy metabolism	ko00920//Sulfur metabolism	K17725	-	GO:0003824//catalytic activity	-
ncbi_113806733	3	3.43E-27	4.05E-26	--	-	-	-	-	-	-	-	-
ncbi_113806734	2	2.31E-99	6.08E-98	mrpl20	PREDICTED: 39S ribosomal protein L20, mitochondrial [Orussus abietinus]	Genetic Information Processing	Translation	ko03010//Ribosome	K02887	-	-	-
ncbi_113806783	4	3.89E-11	2.91E-10	--	-	-	-	-	-	-	-	-
ncbi_113806765	5	6.29E-32	8.09E-31	ube2t	PREDICTED: ubiquitin-conjugating enzyme E2 T [Aptenodytes forsteri]	Genetic Information Processing	Replication and repair	ko03460//Fanconi anemia pathway	K13960	-	-	-
ncbi_113806766	2	2.39E-59	4.50E-58	Larp6	PREDICTED: la-related protein 6-like [Hyalella azteca]	-	-	-	-	-	-	-
ncbi_113806768	1	2.95E-43	4.45E-42	--	-	-	-	-	-	-	-	-
ncbi_113806775	2	1.78E-54	3.16E-53	DEGS1	delta-4 desaturase [Macrobrachium nipponense]	Metabolism;Environmental Information Processing;Metabolism	Global and overview maps;Signal transduction;Lipid metabolism	ko01100//Metabolic pathways;ko04071//Sphingolipid signaling pathway;ko00600//Sphingolipid metabolism	K04712;K04712;K04712	GO:0031224//intrinsic component of membrane	GO:0016491//oxidoreductase activity	GO:0006665//sphingolipid metabolic process
ncbi_113806834	2	4.53E-104	1.25E-102	rpl-7	ribosomal protein L7 [Litopenaeus vannamei]	Genetic Information Processing	Translation	ko03010//Ribosome	K02937	-	-	-
ncbi_113806872	4	1.29E-15	1.13E-14	AAEL008004	elongation of very long chain fatty acids-like protein [Marsupenaeus japonicus]	-	-	-	-	-	-	-
ncbi_113806935	3	0	0	--	PREDICTED: LOW QUALITY PROTEIN: CD109 antigen-like [Galendromus occidentalis]	-	-	-	-	-	-	-
ncbi_113806936	2	2.06E-85	4.93E-84	mep-1	PREDICTED: MOG interacting and ectopic P-granules protein 1 isoform X4 [Halyomorpha halys]	-	-	-	-	-	-	-
ncbi_113806938	1	2.51E-42	3.74E-41	--	-	-	-	-	-	-	-	-
ncbi_113806953	2	9.10E-102	2.45E-100	lig	PREDICTED: protein lingerer-like isoform X2 [Hyalella azteca]	-	-	-	-	-	-	-
ncbi_113806985	5	1.65E-26	1.92E-25	rnf10	PREDICTED: RING finger protein 10 [Agrilus planipennis]	-	-	-	-	-	-	-
ncbi_113806987	4	1.31E-77	2.94E-76	MED22	PREDICTED: mediator of RNA polymerase II transcription subunit 22-like [Hyalella azteca]	-	-	-	-	GO:0043234//protein complex	-	GO:0006355//regulation of transcription, DNA-templated
ncbi_113806994	1	2.23E-186	9.19E-185	ENPP3	PREDICTED: venom phosphodiesterase 2-like [Hyalella azteca]	Metabolism;Metabolism;Metabolism;Metabolism;Metabolism;Metabolism;Metabolism	Global and overview maps;Nucleotide metabolism;Nucleotide metabolism;Carbohydrate metabolism;Metabolism of cofactors and vitamins;Metabolism of cofactors and vitamins;Metabolism of cofactors and vitamins	ko01100//Metabolic pathways;ko00230//Purine metabolism;ko00240//Pyrimidine metabolism;ko00500//Starch and sucrose metabolism;ko00760//Nicotinate and nicotinamide metabolism;ko00770//Pantothenate and CoA biosynthesis;ko00740//Riboflavin metabolism	K01513;K01513;K01513;K01513;K01513;K01513;K01513	-	GO:0003824//catalytic activity	-
ncbi_113806998	2	1.31E-40	1.90E-39	--	PREDICTED: alpha-2-macroglobulin receptor-associated protein-like [Hyalella azteca]	-	-	-	-	-	-	-
ncbi_113806999	4	2.59E-21	2.66E-20	RAP2C	PREDICTED: ras-related protein Rap-2c-like [Hyalella azteca]	Cellular Processes	Cellular community - eukaryotes	ko04530//Tight junction	K07839	-	-	-
ncbi_113807027	3	2.99E-64	5.95E-63	PDH2	pigment dispersing hormone II [Marsupenaeus japonicus]	-	-	-	-	-	-	-
ncbi_113807004	2	7.87E-108	2.23E-106	Snrpd2	PREDICTED: probable small nuclear ribonucleoprotein Sm D2 [Hyalella azteca]	Genetic Information Processing	Transcription	ko03040//Spliceosome	K11096	GO:0030529//intracellular ribonucleoprotein complex	-	-
ncbi_113807012	2	9.08E-48	1.47E-46	gpn2	PREDICTED: GPN-loop GTPase 2-like [Hyalella azteca]	-	-	-	-	-	-	-
ncbi_113807043	2	3.07E-17	2.83E-16	Hccs	PREDICTED: cytochrome c-type heme lyase-like [Hyalella azteca]	Metabolism	Metabolism of cofactors and vitamins	ko00860//Porphyrin and chlorophyll metabolism	K01764	-	-	-
ncbi_113807055	2	4.09E-103	1.11E-101	Rwdd1	small androgen receptor-interacting protein 1 [Penaeus monodon]	-	-	-	-	-	-	-
ncbi_113807058	3	2.99E-12	2.35E-11	SLC26A5	PREDICTED: solute carrier family 26 member 6-like isoform X1 [Hyalella azteca]	-	-	-	-	-	-	-
ncbi_113807065	3	0	0	sdn-1	syndecan precursor [Litopenaeus vannamei]	Human Diseases;Human Diseases;Environmental Information Processing;Human Diseases	Cancers;Cardiovascular diseases;Signaling molecules and interaction;Infectious diseases	ko05205//Proteoglycans in cancer;ko05418//Fluid shear stress and atherosclerosis;ko04514//Cell adhesion molecules (CAMs);ko05144//Malaria	K16336;K16336;K16336;K16336	-	-	-
ncbi_113807059	2	1.70E-17	1.58E-16	ALG2	PREDICTED: alpha-1,3/1,6-mannosyltransferase ALG2 [Gekko japonicus]	Metabolism;Metabolism	Global and overview maps;Glycan biosynthesis and metabolism	ko01100//Metabolic pathways;ko00510//N-Glycan biosynthesis	K03843;K03843	-	GO:0005515//protein binding	GO:0008152//metabolic process
ncbi_113807073	1	1.11E-08	7.46E-08	Smpdl3b	PREDICTED: acid sphingomyelinase-like phosphodiesterase 3b [Jaculus jaculus]	-	-	-	-	-	-	-
ncbi_113807085	3	3.67E-26	4.24E-25	--	-	-	-	-	-	-	-	-
ncbi_113807086	3	3.35E-25	3.80E-24	--	IGF-binding protein, partial [Litopenaeus vannamei]	-	-	-	-	-	-	-
ncbi_113807093	4	5.92E-98	1.55E-96	--	PREDICTED: serine-rich adhesin for platelets-like [Hyalella azteca]	-	-	-	-	-	-	-
ncbi_113807088	4	2.04E-12	1.61E-11	--	PREDICTED: arginine-glutamic acid dipeptide repeats protein-like [Hyalella azteca]	-	-	-	-	-	-	-
ncbi_113807092	2	7.59E-75	1.67E-73	glrx5	PREDICTED: glutaredoxin-related protein 5, mitochondrial-like [Hyalella azteca]	-	-	-	-	-	GO:0015036//disulfide oxidoreductase activity	GO:0019725//cellular homeostasis;GO:0044710//single-organism metabolic process
ncbi_113807091	4	6.66E-18	6.28E-17	Ing1	PREDICTED: inhibitor of growth protein 1 [Megachile rotundata]	-	-	-	-	-	-	-
ncbi_113807111	5	8.76E-22	9.14E-21	plbB	Phospholipase B lamina ancestor [Daphnia magna]	-	-	-	-	-	-	-
ncbi_113807114	2	7.51E-60	1.42E-58	HIGD2A	PREDICTED: HIG1 domain family member 2A, mitochondrial [Bactrocera latifrons]	-	-	-	-	-	-	-
ncbi_113807119	2	5.13E-141	1.78E-139	tma16	PREDICTED: translation machinery-associated protein 16-like [Crassostrea gigas]	-	-	-	-	-	-	-
ncbi_113807120	2	1.31E-18	1.26E-17	--	PREDICTED: translation machinery-associated protein 16-like [Crassostrea gigas]	-	-	-	-	-	-	-
ncbi_113807140	2	0	0	RpL8	ribosomal protein L8 [Litopenaeus vannamei]	Genetic Information Processing	Translation	ko03010//Ribosome	K02938	-	-	-
ncbi_113807130	1	1.14E-67	2.33E-66	--	PREDICTED: transforming growth factor-beta-induced protein ig-h3 [Bemisia tabaci]	-	-	-	-	-	-	-
ncbi_113807134	2	1.58E-18	1.51E-17	Gtp-bp	PREDICTED: signal recognition particle receptor subunit alpha homolog isoform X2 [Copidosoma floridanum]	Genetic Information Processing	Folding, sorting and degradation	ko03060//Protein export	K13431	-	-	-
ncbi_113807135	4	1.89E-20	1.90E-19	B52	PREDICTED: serine/arginine-rich splicing factor 5-like isoform X3 [Hyalella azteca]	Genetic Information Processing;Human Diseases	Transcription;Infectious diseases	ko03040//Spliceosome;ko05168//Herpes simplex infection	K12893;K12893	-	-	-
ncbi_113807152	4	6.01E-20	5.98E-19	Tbcd	PREDICTED: tubulin-specific chaperone D-like [Lingula anatina]	-	-	-	-	-	-	-
ncbi_113807165	2	3.04E-22	3.20E-21	Syngr	Synaptogyrin-2 [Camponotus floridanus]	-	-	-	-	GO:0031224//intrinsic component of membrane	-	-
ncbi_113807167	2	4.39E-121	1.34E-119	Ssrp	PREDICTED: FACT complex subunit Ssrp1-like [Hyalella azteca]	-	-	-	-	-	-	-
ncbi_113807184	3	1.22E-53	2.14E-52	chmp1	Charged multivesicular body protein 1b [Zootermopsis nevadensis]	Cellular Processes;Cellular Processes	Transport and catabolism;Cell growth and death	ko04144//Endocytosis;ko04217//Necroptosis	K12197;K12197	-	-	-
ncbi_113807211	1	7.01E-23	7.50E-22	spz3	PREDICTED: protein spaetzle 3 [Camponotus floridanus]	-	-	-	-	-	-	-
ncbi_113807218	5	1.04E-22	1.11E-21	dmtf1	PREDICTED: cyclin-D-binding Myb-like transcription factor 1 [Branchiostoma belcheri]	-	-	-	-	GO:0031981//nuclear lumen	GO:0001071//nucleic acid binding transcription factor activity	GO:0010468//regulation of gene expression;GO:0034645//cellular macromolecule biosynthetic process
ncbi_113807220	4	3.59E-24	3.96E-23	CWC25	PREDICTED: pre-mRNA-splicing factor CWC25 homolog isoform X1 [Bombus terrestris]	-	-	-	-	-	-	-
ncbi_113807222	1	9.32E-50	1.55E-48	GNBP1	beta-1,3-glucan binding protein [Litopenaeus vannamei]	-	-	-	-	-	-	-
ncbi_113807225	2	2.08E-103	5.68E-102	--	PREDICTED: uncharacterized protein LOC105318154 isoform X2 [Crassostrea gigas]	-	-	-	-	-	-	-
ncbi_113807226	4	2.40E-55	4.30E-54	Saraf	Store-operated calcium entry-associated regulatory factor [Daphnia magna]	-	-	-	-	GO:0016020//membrane	-	GO:0006810//transport
ncbi_113807229	2	1.07E-253	5.47E-252	eIF3-S7	PREDICTED: eukaryotic translation initiation factor 3 subunit D-like [Hyalella azteca]	Genetic Information Processing	Translation	ko03013//RNA transport	K03251	GO:0043234//protein complex;GO:0070993//translation preinitiation complex	GO:0008135//translation factor activity, RNA binding	GO:0006417//regulation of translation
ncbi_113807279	2	5.65E-17	5.17E-16	--	PREDICTED: low density lipoprotein receptor adapter protein 1-B-like isoform X3 [Hyalella azteca]	-	-	-	-	-	-	-
ncbi_113807280	2	0	0	--	PREDICTED: apoptosis-inducing factor 1, mitochondrial-like [Hyalella azteca]	-	-	-	-	-	-	-
ncbi_113807293	4	5.77E-13	4.65E-12	spcs2	PREDICTED: probable signal peptidase complex subunit 2 [Hyalella azteca]	Genetic Information Processing	Folding, sorting and degradation	ko03060//Protein export	K12947	-	-	GO:0006508//proteolysis
ncbi_113807296	1	1.18E-50	1.99E-49	--	-	-	-	-	-	-	-	-
ncbi_113807301	3	7.28E-13	5.85E-12	mew	Integrin alpha-6 [Daphnia magna]	Human Diseases;Cellular Processes;Environmental Information Processing;Cellular Processes;Human Diseases;Human Diseases;Human Diseases;Environmental Information Processing	Infectious diseases;Cellular community - eukaryotes;Signal transduction;Cell motility;Cardiovascular diseases;Cardiovascular diseases;Cardiovascular diseases;Signaling molecules and interaction	ko05165//Human papillomavirus infection;ko04510//Focal adhesion;ko04151//PI3K-Akt signaling pathway;ko04810//Regulation of actin cytoskeleton;ko05410//Hypertrophic cardiomyopathy (HCM);ko05414//Dilated cardiomyopathy (DCM);ko05412//Arrhythmogenic right ventricular cardiomyopathy (ARVC);ko04512//ECM-receptor interaction	K06583;K06583;K06583;K06583;K06583;K06583;K06583;K06583	-	-	-
ncbi_113807311	2	6.69E-250	3.38E-248	NDUFA2	PREDICTED: NADH dehydrogenase [ubiquinone] 1 alpha subcomplex subunit 2 [Stegastes partitus]	Metabolism;Organismal Systems;Human Diseases;Human Diseases;Human Diseases;Human Diseases;Metabolism;Organismal Systems	Global and overview maps;Environmental adaptation;Neurodegenerative diseases;Neurodegenerative diseases;Endocrine and metabolic diseases;Neurodegenerative diseases;Energy metabolism;Nervous system	ko01100//Metabolic pathways;ko04714//Thermogenesis;ko05016//Huntington disease;ko05010//Alzheimer disease;ko04932//Non-alcoholic fatty liver disease (NAFLD);ko05012//Parkinson disease;ko00190//Oxidative phosphorylation;ko04723//Retrograde endocannabinoid signaling	K03946;K03946;K03946;K03946;K03946;K03946;K03946;K03946	GO:0019866//organelle inner membrane;GO:0031966//mitochondrial membrane;GO:0044425//membrane part	-	GO:0044710//single-organism metabolic process
ncbi_113807315	3	8.22E-90	2.03E-88	IscW_ISCW007295	PREDICTED: 1,2-dihydroxy-3-keto-5-methylthiopentene dioxygenase-like [Papilio machaon]	Metabolism;Metabolism	Global and overview maps;Amino acid metabolism	ko01100//Metabolic pathways;ko00270//Cysteine and methionine metabolism	K08967;K08967	GO:0043231//intracellular membrane-bounded organelle	GO:0016702//oxidoreductase activity, acting on single donors with incorporation of molecular oxygen, incorporation of two atoms of oxygen;GO:0043169//cation binding	GO:0071267//L-methionine salvage
ncbi_113807317	5	1.39E-17	1.29E-16	--	-	-	-	-	-	-	-	-
ncbi_113807353	1	2.17E-27	2.58E-26	--	PREDICTED: uncharacterized protein LOC106472833, partial [Limulus polyphemus]	-	-	-	-	-	-	-
ncbi_113807359	4	1.67E-58	3.10E-57	HDAC1	PREDICTED: histone deacetylase Rpd3-like [Hyalella azteca]	Human Diseases;Human Diseases;Organismal Systems;Human Diseases;Human Diseases;Human Diseases;Organismal Systems;Human Diseases;Human Diseases;Human Diseases;Cellular Processes;Human Diseases;Human Diseases;Environmental Information Processing	Cancers;Infectious diseases;Endocrine system;Neurodegenerative diseases;Cancers;Cancers;Aging;Substance dependence;Cancers;Infectious diseases;Cell growth and death;Cancers;Substance dependence;Signal transduction	ko05200//Pathways in cancer;ko05165//Human papillomavirus infection;ko04919//Thyroid hormone signaling pathway;ko05016//Huntington disease;ko05202//Transcriptional misregulation in cancers;ko05206//MicroRNAs in cancer;ko04213//Longevity regulating pathway - multiple species;ko05034//Alcoholism;ko05203//Viral carcinogenesis;ko05169//Epstein-Barr virus infection;ko04110//Cell cycle;ko05220//Chronic…	K06067;K06067;K06067;K06067;K06067;K06067;K06067;K06067;K06067;K06067;K06067;K06067;K06067;K06067	-	-	-
ncbi_113807368	2	6.81E-59	1.27E-57	MRPL58	PREDICTED: peptidyl-tRNA hydrolase ICT1, mitochondrial [Neodiprion lecontei]	-	-	-	-	-	-	-
ncbi_113807384	1	2.05E-35	2.77E-34	sod-1	copper/zinc superoxide dismutase isoform 2 [Marsupenaeus japonicus]	Human Diseases;Organismal Systems;Cellular Processes;Human Diseases;Human Diseases	Neurodegenerative diseases;Aging;Transport and catabolism;Neurodegenerative diseases;Neurodegenerative diseases	ko05016//Huntington disease;ko04213//Longevity regulating pathway - multiple species;ko04146//Peroxisome;ko05014//Amyotrophic lateral sclerosis (ALS);ko05020//Prion diseases	K04565;K04565;K04565;K04565;K04565	-	GO:0003824//catalytic activity;GO:0016209//antioxidant activity	GO:0006801//superoxide metabolic process;GO:0044710//single-organism metabolic process
ncbi_113807387	3	4.81E-52	8.24E-51	Sirt2	NAD-dependent deacetylase sirtuin-2 [Zootermopsis nevadensis]	-	-	-	-	-	GO:0000166//nucleotide binding;GO:0043167//ion binding	-
ncbi_113807388	5	7.71E-57	1.41E-55	SIDT2	SID-1-like protein [Litopenaeus vannamei]	-	-	-	-	-	-	-
ncbi_113807389	4	2.06E-14	1.75E-13	METTL3	N6-adenosine-methyltransferase 70 kDa subunit [Zootermopsis nevadensis]	-	-	-	-	-	-	-
ncbi_113807392	1	6.70E-53	1.16E-51	--	-	-	-	-	-	-	-	-
ncbi_113807409	4	2.86E-43	4.31E-42	slo	calcium-activated potassium channel transcript variant 1 [Scylla paramamosain]	Organismal Systems;Environmental Information Processing;Organismal Systems;Organismal Systems;Organismal Systems;Organismal Systems	Digestive system;Signal transduction;Circulatory system;Endocrine system;Digestive system;Endocrine system	ko04972//Pancreatic secretion;ko04022//cGMP - PKG signaling pathway;ko04270//Vascular smooth muscle contraction;ko04924//Renin secretion;ko04970//Salivary secretion;ko04911//Insulin secretion	K04936;K04936;K04936;K04936;K04936;K04936	-	-	-
ncbi_113807410	1	0	0	PPAF2	serine protease [Penaeus monodon]	-	-	-	-	-	-	-
ncbi_113807414	4	2.97E-35	4.00E-34	--	PREDICTED: uncharacterized protein LOC108683041 [Hyalella azteca]	-	-	-	-	-	-	-
ncbi_113807415	2	8.15E-38	1.14E-36	wdr4	PREDICTED: tRNA (guanine-N(7)-)-methyltransferase non-catalytic subunit trm82-like, partial [Hyalella azteca]	-	-	-	-	-	-	GO:0016070//RNA metabolic process
ncbi_113807419	5	3.79E-09	2.63E-08	G2E3	G2/M phase-specific E3 ubiquitin-protein ligase [Daphnia magna]	-	-	-	-	-	-	-
ncbi_113807427	1	0	0	snk	clip domain serine proteinase 3 [Portunus trituberculatus]	-	-	-	-	-	-	-
ncbi_113807430	2	0	0	PSMB6	PREDICTED: proteasome subunit beta type-6-like [Hyalella azteca]	Genetic Information Processing	Folding, sorting and degradation	ko03050//Proteasome	K02738	-	-	-
ncbi_113807469	4	5.24E-21	5.34E-20	VCPKMT	PREDICTED: protein-lysine methyltransferase METTL21D-like [Lingula anatina]	-	-	-	-	-	-	-
ncbi_113807443	1	8.14E-104	2.24E-102	SLC28A3	PREDICTED: solute carrier family 28 member 3-like [Hyalella azteca]	-	-	-	-	-	-	-
ncbi_113807484	2	1.28E-44	1.97E-43	DCTN6	PREDICTED: dynactin subunit 6-like [Hyalella azteca]	Organismal Systems	Excretory system	ko04962//Vasopressin-regulated water reabsorption	K10428	GO:0000776//kinetochore;GO:0015630//microtubule cytoskeleton;GO:0044430//cytoskeletal part	-	-
ncbi_113807495	4	1.80E-69	3.77E-68	Bcap29	PREDICTED: B-cell receptor-associated protein 31-like [Hyalella azteca]	Human Diseases;Genetic Information Processing	Infectious diseases;Folding, sorting and degradation	ko05165//Human papillomavirus infection;ko04141//Protein processing in endoplasmic reticulum	K14009;K14009	-	-	-
ncbi_113807497	2	2.04E-106	5.70E-105	--	-	-	-	-	-	-	-	-
ncbi_113807516	3	1.70E-13	1.39E-12	--	-	-	-	-	-	-	-	-
ncbi_113807525	3	1.53E-16	1.39E-15	ybgG	PREDICTED: homocysteine S-methyltransferase YbgG-like isoform X1 [Hyalella azteca]	Metabolism;Metabolism	Global and overview maps;Amino acid metabolism	ko01100//Metabolic pathways;ko00270//Cysteine and methionine metabolism	K00547;K00547	-	-	-
ncbi_113807528	2	1.57E-14	1.34E-13	Cth	Cystathionine gamma-lyase [Daphnia magna]	Metabolism;Metabolism;Metabolism;Metabolism;Metabolism	Global and overview maps;Global and overview maps;Amino acid metabolism;Amino acid metabolism;Metabolism of other amino acids	ko01100//Metabolic pathways;ko01230//Biosynthesis of amino acids;ko00260//Glycine, serine and threonine metabolism;ko00270//Cysteine and methionine metabolism;ko00450//Selenocompound metabolism	K01758;K01758;K01758;K01758;K01758	-	-	-
ncbi_113807532	3	0	0	DFR	PREDICTED: cinnamoyl-CoA reductase 2-like [Parasteatoda tepidariorum]	-	-	-	-	-	-	-
ncbi_113807529	5	5.39E-15	4.67E-14	Ammecr1	PREDICTED: AMMECR1-like protein [Hyalella azteca]	-	-	-	-	-	-	-
ncbi_113807535	3	1.41E-15	1.23E-14	--	Beta-1,4 N-acetylgalactosaminyltransferase 1 [Exaiptasia pallida]	-	-	-	-	-	-	-
ncbi_113807538	5	0	0	ZNFX1	PREDICTED: NFX1-type zinc finger-containing protein 1-like, partial [Hyalella azteca]	-	-	-	-	-	-	-
ncbi_113807542	4	3.57E-16	3.20E-15	--	tachylectin [Macrobrachium rosenbergii]	-	-	-	-	-	-	-
ncbi_113807539	5	0	0	ubi	PREDICTED: polyubiquitin-B-like [Leptonychotes weddellii]	Organismal Systems	Endocrine system	ko03320//PPAR signaling pathway	K08770	-	-	-
ncbi_113807540	3	4.32E-56	7.81E-55	--	GTPase IMAP family member [Daphnia magna]	-	-	-	-	-	-	-
ncbi_113807541	3	0	0	--	hypothetical protein DAPPUDRAFT_213114 [Daphnia pulex]	-	-	-	-	-	-	-
ncbi_113807546	2	5.51E-42	8.18E-41	ECI2	PREDICTED: enoyl-CoA delta isomerase 2, mitochondrial [Clupea harengus]	Cellular Processes;Metabolism	Transport and catabolism;Lipid metabolism	ko04146//Peroxisome;ko00071//Fatty acid degradation	K13239;K13239	-	GO:0003824//catalytic activity	-
ncbi_113807551	4	9.61E-17	8.76E-16	Nup98	PREDICTED: nuclear pore complex protein Nup98-Nup96 isoform X1 [Bison bison bison]	Genetic Information Processing;Human Diseases	Translation;Infectious diseases	ko03013//RNA transport;ko05164//Influenza A	K14297;K14297	GO:0044428//nuclear part	-	-
ncbi_113807572	5	9.49E-26	1.09E-24	CCNT1	cyclin T [Penaeus monodon]	Human Diseases	Cancers	ko05202//Transcriptional misregulation in cancers	K15188	-	-	-
ncbi_113807594	4	1.91E-100	5.07E-99	alyref	PREDICTED: THO complex subunit 4 isoform X1 [Ceratina calcarata]	Genetic Information Processing;Genetic Information Processing;Human Diseases;Genetic Information Processing	Translation;Transcription;Infectious diseases;Translation	ko03013//RNA transport;ko03040//Spliceosome;ko05168//Herpes simplex infection;ko03015//mRNA surveillance pathway	K12881;K12881;K12881;K12881	-	-	-
ncbi_113807597	3	9.97E-113	2.91E-111	--	-	-	-	-	-	-	-	-
ncbi_113807604	2	1.73E-13	1.42E-12	CYB5RL	PREDICTED: NADH-cytochrome b5 reductase-like [Hyalella azteca]	Metabolism	Carbohydrate metabolism	ko00520//Amino sugar and nucleotide sugar metabolism	K00326	-	-	-
ncbi_113807612	1	1.24E-14	1.06E-13	AGAP009593	PREDICTED: carboxypeptidase B-like [Hyalella azteca]	-	-	-	-	-	-	-
ncbi_113807613	3	1.03E-42	1.55E-41	sup-17	disintegrin and metalloproteinase domain-containing protein 10 [Eriocheir sinensis]	Human Diseases;Human Diseases	Neurodegenerative diseases;Infectious diseases	ko05010//Alzheimer disease;ko05120//Epithelial cell signaling in Helicobacter pylori infection	K06704;K06704	-	-	-
ncbi_113807625	4	8.63E-43	1.30E-41	Creb1	cAMP-responsive element binding protein, partial [Procambarus clarkii]	-	-	-	-	-	-	-
ncbi_113807636	2	6.64E-22	6.95E-21	Ddx10	PREDICTED: probable ATP-dependent RNA helicase DDX10 [Megachile rotundata]	-	-	-	-	-	-	-
ncbi_113807651	4	2.23E-145	7.90E-144	l(2)k12914	defender against apoptotic death [Marsupenaeus japonicus]	Metabolism;Genetic Information Processing;Metabolism	Global and overview maps;Folding, sorting and degradation;Glycan biosynthesis and metabolism	ko01100//Metabolic pathways;ko04141//Protein processing in endoplasmic reticulum;ko00510//N-Glycan biosynthesis	K12668;K12668;K12668	GO:0031090//organelle membrane;GO:0031224//intrinsic component of membrane;GO:0043231//intracellular membrane-bounded organelle	GO:0003824//catalytic activity	GO:0006464//cellular protein modification process
ncbi_113807652	2	6.80E-16	6.04E-15	NUDT14	PREDICTED: uridine diphosphate glucose pyrophosphatase-like [Bombyx mori]	-	-	-	-	-	GO:0016787//hydrolase activity	-
ncbi_113807654	2	1.46E-37	2.04E-36	Dynlt1	PREDICTED: dynein light chain Tctex-type 1-like [Hyalella azteca]	-	-	-	-	-	-	-
ncbi_113807660	2	1.49E-55	2.67E-54	PTGR1	protaglandin reductase 1 [Penaeus monodon]	-	-	-	-	-	-	-
ncbi_113807663	3	1.22E-50	2.05E-49	Galr2	PREDICTED: G-protein coupled receptor moody-like [Parasteatoda tepidariorum]	Environmental Information Processing	Signaling molecules and interaction	ko04080//Neuroactive ligand-receptor interaction	K05053	-	-	-
ncbi_113807669	2	0	0	SNRPG	small nuclear ribonucleoprotein polypeptide G [Penaeus monodon]	Genetic Information Processing	Transcription	ko03040//Spliceosome	K11099	GO:0005681//spliceosomal complex;GO:0031981//nuclear lumen;GO:0034708//methyltransferase complex;GO:0044423//virion part;GO:0044444//cytoplasmic part;GO:0097525//spliceosomal snRNP complex	GO:0003723//RNA binding;GO:0003824//catalytic activity	GO:0000377//RNA splicing, via transesterification reactions with bulged adenosine as nucleophile;GO:0006353//DNA-templated transcription, termination;GO:0006397//mRNA processing;GO:0022618//ribonucleoprotein complex assembly;GO:0044710//single-organism metabolic process
ncbi_113807676	2	4.83E-68	9.91E-67	Nurf-38	PREDICTED: inorganic pyrophosphatase-like isoform X2 [Hyalella azteca]	Metabolism	Energy metabolism	ko00190//Oxidative phosphorylation	K11726	GO:0044424//intracellular part	GO:0016462//pyrophosphatase activity	GO:0006793//phosphorus metabolic process
ncbi_113807706	1	0	0	MP1	clip domain serine proteinase 1 [Portunus trituberculatus]	-	-	-	-	-	-	-
ncbi_113807734	3	6.05E-13	4.88E-12	--	-	-	-	-	-	-	-	-
ncbi_113807724	4	2.05E-13	1.67E-12	--	Protein-L-isoaspartate O-methyltransferase [Oxytricha trifallax]	-	-	-	-	-	-	-
ncbi_113807764	2	7.04E-12	5.44E-11	--	-	-	-	-	-	-	-	-
ncbi_113807791	5	0	0	--	-	-	-	-	-	-	-	-
ncbi_113807823	4	5.62E-19	5.45E-18	--	hypothetical protein, partial [Haematobia irritans]	-	-	-	-	-	-	-
ncbi_113807825	1	2.27E-21	2.34E-20	--	-	-	-	-	-	-	-	-
ncbi_113807827	2	4.62E-12	3.60E-11	l(1)G0156	Isocitrate dehydrogenase [NAD] subunit, mitochondrial [Daphnia magna]	Metabolism;Metabolism;Metabolism;Metabolism;Metabolism	Global and overview maps;Global and overview maps;Global and overview maps;Carbohydrate metabolism;Global and overview maps	ko01100//Metabolic pathways;ko01200//Carbon metabolism;ko01230//Biosynthesis of amino acids;ko00020//Citrate cycle (TCA cycle);ko01210//2-Oxocarboxylic acid metabolism	K00030;K00030;K00030;K00030;K00030	-	-	-
ncbi_113807830	2	6.47E-192	2.71E-190	PMPCB	PREDICTED: mitochondrial-processing peptidase subunit beta-like [Limulus polyphemus]	-	-	-	-	-	GO:0004175//endopeptidase activity;GO:0043169//cation binding	GO:0019538//protein metabolic process
ncbi_113807831	1	8.32E-15	7.15E-14	slc52a3b	Solute carrier family 52, riboflavin transporter, member 1 [Daphnia magna]	Organismal Systems	Digestive system	ko04977//Vitamin digestion and absorption	K14620	-	-	-
ncbi_113807833	5	0	0	PRDX5	peroxiredoxin-5 [Palaemon carinicauda]	Cellular Processes	Transport and catabolism	ko04146//Peroxisome	K11187	-	-	-
ncbi_113807843	3	5.42E-136	1.82E-134	Naxd	PREDICTED: ATP-dependent (S)-NAD(P)H-hydrate dehydratase-like isoform X2 [Hyalella azteca]	-	-	-	-	-	-	-
ncbi_113807876	2	2.70E-19	2.64E-18	Xrcc6	PREDICTED: X-ray repair cross-complementing protein 6-like [Hyalella azteca]	Genetic Information Processing	Replication and repair	ko03450//Non-homologous end-joining	K10884	-	-	-
ncbi_113807880	3	1.10E-09	7.79E-09	CYTH1	PREDICTED: cytohesin-1-like isoform X3 [Hyalella azteca]	Cellular Processes;Environmental Information Processing	Transport and catabolism;Signal transduction	ko04144//Endocytosis;ko04072//Phospholipase D signaling pathway	K18441;K18441	-	-	-
ncbi_113807885	2	6.04E-49	9.94E-48	--	Glomulin [Zootermopsis nevadensis]	-	-	-	-	-	-	-
ncbi_113807911	1	0	0	rgn	PREDICTED: regucalcin-like isoform X2 [Acromyrmex echinatior]	Metabolism;Metabolism;Metabolism;Metabolism	Global and overview maps;Global and overview maps;Carbohydrate metabolism;Carbohydrate metabolism	ko01100//Metabolic pathways;ko01200//Carbon metabolism;ko00053//Ascorbate and aldarate metabolism;ko00030//Pentose phosphate pathway	K01053;K01053;K01053;K01053	-	-	-
ncbi_113807918	2	1.54E-55	2.76E-54	ubc-1	ubiquitin-conjugating enzyme E2 A [Penaeus monodon]	Genetic Information Processing	Folding, sorting and degradation	ko04120//Ubiquitin mediated proteolysis	K10573	-	GO:0003824//catalytic activity	-
ncbi_113807959	4	2.09E-41	3.09E-40	SSR2	PREDICTED: translocon-associated protein subunit beta-like [Hyalella azteca]	Genetic Information Processing	Folding, sorting and degradation	ko04141//Protein processing in endoplasmic reticulum	K13250	-	-	-
ncbi_113807989	4	2.48E-64	4.94E-63	Dnajb2	PREDICTED: dnaJ homolog subfamily B member 6 isoform X2 [Agrilus planipennis]	-	-	-	-	-	-	-
ncbi_113808006	4	1.37E-12	1.09E-11	Xpnpep1	PREDICTED: xaa-Pro aminopeptidase 1 isoform X1 [Gekko japonicus]	-	-	-	-	GO:0031988//membrane-bounded vesicle;GO:0044424//intracellular part	GO:0004177//aminopeptidase activity;GO:0046914//transition metal ion binding;GO:0046983//protein dimerization activity	GO:0019538//protein metabolic process;GO:0043171//peptide catabolic process
ncbi_113808012	2	4.53E-280	2.47E-278	--	CLUMA_CG003202, isoform A [Clunio marinus]	Metabolism;Organismal Systems;Human Diseases;Human Diseases;Human Diseases;Human Diseases;Metabolism;Organismal Systems	Global and overview maps;Environmental adaptation;Neurodegenerative diseases;Neurodegenerative diseases;Endocrine and metabolic diseases;Neurodegenerative diseases;Energy metabolism;Nervous system	ko01100//Metabolic pathways;ko04714//Thermogenesis;ko05016//Huntington disease;ko05010//Alzheimer disease;ko04932//Non-alcoholic fatty liver disease (NAFLD);ko05012//Parkinson disease;ko00190//Oxidative phosphorylation;ko04723//Retrograde endocannabinoid signaling	K03968;K03968;K03968;K03968;K03968;K03968;K03968;K03968	GO:0016020//membrane	-	-
ncbi_113808014	1	0	0	--	-	-	-	-	-	-	-	-
ncbi_113808019	2	9.65E-09	6.53E-08	Cpsf100	PREDICTED: probable cleavage and polyadenylation specificity factor subunit 2 [Vollenhovia emeryi]	Genetic Information Processing	Translation	ko03015//mRNA surveillance pathway	K14402	-	-	-
ncbi_113808024	3	3.37E-16	3.02E-15	--	Epididymal secretory protein E1 [Exaiptasia pallida]	-	-	-	-	-	-	-
ncbi_113808020	2	2.33E-10	1.69E-09	Fam96b	PREDICTED: mitotic spindle-associated MMXD complex subunit MIP18 [Esox lucius]	-	-	-	-	-	-	-
ncbi_113808023	2	5.77E-33	7.56E-32	NMT2	PREDICTED: glycylpeptide N-tetradecanoyltransferase [Microplitis demolitor]	-	-	-	-	-	-	-
ncbi_113808073	3	7.06E-28	8.45E-27	--	-	-	-	-	-	-	-	-
ncbi_113808099	4	2.29E-169	8.94E-168	--	PREDICTED: late histone H1-like [Neodiprion lecontei]	-	-	-	-	-	-	-
ncbi_113808102	2	1.17E-33	1.55E-32	TTC4	PREDICTED: tetratricopeptide repeat protein 4-like [Hyalella azteca]	-	-	-	-	-	-	-
ncbi_113808105	4	4.31E-20	4.30E-19	--	PREDICTED: protein tramtrack, beta isoform-like, partial [Rhagoletis zephyria]	-	-	-	-	-	-	GO:0008152//metabolic process
ncbi_113808115	4	2.91E-26	3.37E-25	--	AAEL005369-PB [Aedes aegypti]	-	-	-	-	-	-	-
ncbi_113808117	3	1.52E-19	1.50E-18	Pcmtd1	PREDICTED: protein-L-isoaspartate O-methyltransferase domain-containing protein 1-like [Eufriesea mexicana]	-	-	-	-	-	-	GO:0008152//metabolic process
ncbi_113808173	2	2.74578867042646e-315	1.62263339312408e-313	CTSB	cathepsin B [Litopenaeus vannamei]	Cellular Processes;Cellular Processes;Cellular Processes;Organismal Systems;Organismal Systems;Organismal Systems	Transport and catabolism;Cell growth and death;Transport and catabolism;Immune system;Endocrine system;Immune system	ko04142//Lysosome;ko04210//Apoptosis;ko04140//Autophagy - animal;ko04621//NOD-like receptor signaling pathway;ko04924//Renin secretion;ko04612//Antigen processing and presentation	K01363;K01363;K01363;K01363;K01363;K01363	-	GO:0008233//peptidase activity	GO:0008152//metabolic process
ncbi_113808174	2	2.19E-20	2.20E-19	ENGASE	PREDICTED: cytosolic endo-beta-N-acetylglucosaminidase-like [Lingula anatina]	Metabolism	Glycan biosynthesis and metabolism	ko00511//Other glycan degradation	K01227	-	-	-
ncbi_113808199	5	3.34E-09	2.32E-08	CG10341	PREDICTED: H/ACA ribonucleoprotein complex non-core subunit NAF1 [Papilio machaon]	-	-	-	-	-	-	-
ncbi_113808197	2	0	0	RPSA	laminin receptor [Litopenaeus vannamei]	Genetic Information Processing	Translation	ko03010//Ribosome	K02998	-	-	-
ncbi_113808210	3	8.17E-10	5.80E-09	Hydr2	PREDICTED: abhydrolase domain-containing protein 2-like [Hyalella azteca]	-	-	-	-	-	-	-
ncbi_113808206	3	4.15E-24	4.57E-23	--	PREDICTED: nucleotide-binding oligomerization domain-containing protein 2-like [Branchiostoma belcheri]	-	-	-	-	-	-	-
ncbi_113808213	4	2.88E-20	2.89E-19	CCDC12	PREDICTED: coiled-coil domain-containing protein 12-like [Hyalella azteca]	Genetic Information Processing	Transcription	ko03040//Spliceosome	K12871	-	-	-
ncbi_113808316	3	7.31E-71	1.55E-69	pi4kb	PREDICTED: phosphatidylinositol 4-kinase beta-like [Hyalella azteca]	Metabolism;Metabolism;Environmental Information Processing	Global and overview maps;Carbohydrate metabolism;Signal transduction	ko01100//Metabolic pathways;ko00562//Inositol phosphate metabolism;ko04070//Phosphatidylinositol signaling system	K19801;K19801;K19801	-	GO:0016740//transferase activity	GO:0009987//cellular process
ncbi_113808319	1	0	0	Erap1	PREDICTED: endoplasmic reticulum aminopeptidase 1 isoform X2 [Copidosoma floridanum]	Organismal Systems	Endocrine system	ko04614//Renin-angiotensin system	K11141	-	-	-
ncbi_113808325	5	1.16E-41	1.72E-40	--	-	-	-	-	-	-	-	-
ncbi_113808327	2	0	0	F26E4.3	Tubulointerstitial nephritis antigen-like protein [Daphnia magna]	-	-	-	-	-	-	-
ncbi_113808329	4	1.54E-15	1.35E-14	Polb	PREDICTED: DNA polymerase beta [Sorex araneus]	Human Diseases;Human Diseases;Genetic Information Processing	Infectious diseases;Cancers;Replication and repair	ko05166//HTLV-I infection;ko05203//Viral carcinogenesis;ko03410//Base excision repair	K02330;K02330;K02330	GO:0005819//spindle;GO:0043231//intracellular membrane-bounded organelle	GO:0015631//tubulin binding;GO:0034061//DNA polymerase activity;GO:0043169//cation binding	GO:0006260//DNA replication;GO:0006281//DNA repair;GO:0070997//neuron death
ncbi_113808337	1	0	0	Ald	fructose 1,6-biphosphate-aldolase A [Fenneropenaeus chinensis]	Metabolism;Metabolism;Metabolism;Metabolism;Environmental Information Processing;Metabolism;Metabolism	Global and overview maps;Global and overview maps;Carbohydrate metabolism;Global and overview maps;Signal transduction;Carbohydrate metabolism;Carbohydrate metabolism	ko01100//Metabolic pathways;ko01200//Carbon metabolism;ko00010//Glycolysis / Gluconeogenesis;ko01230//Biosynthesis of amino acids;ko04066//HIF-1 signaling pathway;ko00051//Fructose and mannose metabolism;ko00030//Pentose phosphate pathway	K01623;K01623;K01623;K01623;K01623;K01623;K01623	-	-	-
ncbi_113808344	3	5.13E-14	4.30E-13	--	-	-	-	-	-	-	-	-
ncbi_113808348	3	1.22E-191	5.09E-190	Lamp1	PREDICTED: lysosome-associated membrane glycoprotein 1-like [Hyalella azteca]	Cellular Processes;Cellular Processes;Cellular Processes;Human Diseases	Transport and catabolism;Transport and catabolism;Transport and catabolism;Infectious diseases	ko04145//Phagosome;ko04142//Lysosome;ko04140//Autophagy - animal;ko05152//Tuberculosis	K06528;K06528;K06528;K06528	-	-	-
ncbi_113808363	5	6.01E-45	9.27E-44	Tmem50a	PREDICTED: transmembrane protein 50A [Oreochromis niloticus]	-	-	-	-	-	-	-
ncbi_113808364	2	0	0	RpL10	QM protein [Penaeus monodon]	Genetic Information Processing	Translation	ko03010//Ribosome	K02866	GO:0030529//intracellular ribonucleoprotein complex	-	GO:0010467//gene expression
ncbi_113808371	4	3.05E-137	1.03E-135	Ube2n	PREDICTED: ubiquitin-conjugating enzyme E2 N [Hyalella azteca]	Genetic Information Processing;Organismal Systems	Folding, sorting and degradation;Immune system	ko04120//Ubiquitin mediated proteolysis;ko04624//Toll and Imd signaling pathway	K10580;K10580	-	GO:0003824//catalytic activity	-
ncbi_113808373	2	2.48E-34	3.30E-33	mRpL22	PREDICTED: 39S ribosomal protein L22, mitochondrial [Drosophila miranda]	Genetic Information Processing	Translation	ko03010//Ribosome	K02890	GO:0005840//ribosome	-	-
ncbi_113808375	2	1.19E-08	8.00E-08	l(1)G0269	PREDICTED: CTD nuclear envelope phosphatase 1-like [Hyalella azteca]	-	-	-	-	-	GO:0042578//phosphoric ester hydrolase activity	GO:0006796//phosphate-containing compound metabolic process
ncbi_113808376	4	9.75E-12	7.50E-11	NIPBL	PREDICTED: nipped-B-like protein A [Hyalella azteca]	-	-	-	-	-	-	-
ncbi_113808379	2	2.36E-12	1.86E-11	RBM41	PREDICTED: RNA-binding protein 41-like [Saccoglossus kowalevskii]	-	-	-	-	-	-	-
ncbi_113808384	2	1.58E-12	1.26E-11	GK22227	PREDICTED: ribosome biogenesis protein BOP1 homolog isoform X2 [Ceratina calcarata]	-	-	-	-	-	-	-
ncbi_113808392	2	1.82E-42	2.72E-41	GK22227	Ribosome biogenesis protein bop1 [Daphnia magna]	-	-	-	-	-	-	-
ncbi_113808455	2	1.26E-51	2.16E-50	Sart1	PREDICTED: U4/U6.U5 tri-snRNP-associated protein 1-like [Hyalella azteca]	Genetic Information Processing	Transcription	ko03040//Spliceosome	K11984	-	-	-
ncbi_113808470	2	1.69E-20	1.70E-19	Nup43	PREDICTED: nucleoporin Nup43-like [Hyalella azteca]	Genetic Information Processing	Translation	ko03013//RNA transport	K14305	-	-	-
ncbi_113808490	4	3.19E-17	2.94E-16	RFC5	PREDICTED: replication factor C subunit 5-like [Lingula anatina]	Genetic Information Processing;Genetic Information Processing;Genetic Information Processing	Replication and repair;Replication and repair;Replication and repair	ko03420//Nucleotide excision repair;ko03030//DNA replication;ko03430//Mismatch repair	K10756;K10756;K10756	-	GO:0032550//purine ribonucleoside binding	GO:0006259//DNA metabolic process;GO:0009888//tissue development
ncbi_113808507	2	0	0	RPL21	PREDICTED: 60S ribosomal protein L21-like [Hyalella azteca]	Genetic Information Processing	Translation	ko03010//Ribosome	K02889	-	-	-
ncbi_113808508	4	2.30E-206	1.02E-204	Spase22-23	PREDICTED: signal peptidase complex subunit 3 [Camponotus floridanus]	Genetic Information Processing	Folding, sorting and degradation	ko03060//Protein export	K12948	-	-	GO:0006508//proteolysis
ncbi_113808513	2	1.85E-87	4.52E-86	ZNF706	PREDICTED: zinc finger protein 706-like [Hyalella azteca]	-	-	-	-	-	-	-
ncbi_113808526	4	3.34E-21	3.42E-20	TRIM33	PREDICTED: protein kinase C-binding protein 1-like [Hyalella azteca]	-	-	-	-	-	-	-
ncbi_113808529	5	5.11E-50	8.54E-49	--	-	-	-	-	-	-	-	-
ncbi_113808531	4	1.92E-26	2.23E-25	DHX34	PREDICTED: probable ATP-dependent RNA helicase DHX34 [Hyalella azteca]	-	-	-	-	-	-	-
ncbi_113808542	3	1.55E-75	3.42E-74	mid1ip1a	PREDICTED: myb-like protein A [Hyalella azteca]	-	-	-	-	-	-	-
ncbi_113808543	1	0	0	--	single whey acidic protein domain-containing protein isoform 3 [Penaeus monodon]	-	-	-	-	-	-	-
ncbi_113808556	4	1.25E-18	1.20E-17	--	PREDICTED: trihelix transcription factor GTL1-like [Scleropages formosus]	-	-	-	-	-	-	-
ncbi_113808560	2	2.86E-34	3.81E-33	MRPS35	PREDICTED: LOW QUALITY PROTEIN: 28S ribosomal protein S35, mitochondrial [Aethina tumida]	-	-	-	-	-	-	-
ncbi_113808564	5	4.05E-49	6.68E-48	Psf2	PREDICTED: DNA replication complex GINS protein PSF2 [Crassostrea gigas]	-	-	-	-	-	-	GO:0006259//DNA metabolic process
ncbi_113808588	4	2.01E-37	2.80E-36	vps29	Xaa-pro dipeptidase-like protein [Coptotermes formosanus]	Cellular Processes	Transport and catabolism	ko04144//Endocytosis	K18467	-	-	-
ncbi_113808589	1	0	0	--	crustacean hematopoietic factor-like protein [Litopenaeus vannamei]	-	-	-	-	-	-	-
ncbi_113808590	1	2.13E-84	5.06E-83	--	-	-	-	-	-	-	-	-
ncbi_113808593	4	9.15E-13	7.31E-12	--	PREDICTED: transmembrane protein 242 isoform X2 [Polistes dominula]	-	-	-	-	-	-	-
ncbi_113808600	2	2.06E-56	3.75E-55	MYCBP	PREDICTED: C-Myc-binding protein-like [Octopus bimaculoides]	-	-	-	-	-	-	-
ncbi_113808603	4	0	0	chst14	PREDICTED: carbohydrate sulfotransferase 11 isoform X2 [Ceratitis capitata]	Metabolism	Glycan biosynthesis and metabolism	ko00532//Glycosaminoglycan biosynthesis - chondroitin sulfate / dermatan sulfate	K01017	-	-	-
ncbi_113808605	3	6.44E-52	1.10E-50	slc16a12	PREDICTED: monocarboxylate transporter 3 isoform X4 [Nicrophorus vespilloides]	-	-	-	-	-	-	-
ncbi_113808617	4	6.12E-23	6.55E-22	Eml1	Echinoderm microtubule-associated protein-like 1, partial [Zootermopsis nevadensis]	-	-	-	-	-	-	-
ncbi_113808631	2	0	0	rpl-11.2	PREDICTED: 60S ribosomal protein L11-like [Hyalella azteca]	Genetic Information Processing	Translation	ko03010//Ribosome	K02868	GO:0030529//intracellular ribonucleoprotein complex	-	GO:0010467//gene expression
ncbi_113808641	2	4.04E-29	4.93E-28	MRPS31	PREDICTED: 28S ribosomal protein S31, mitochondrial [Papilio xuthus]	-	-	-	-	-	-	-
ncbi_113808646	3	8.02E-23	8.56E-22	Mmp2	Matrix metalloproteinase-24 [Zootermopsis nevadensis]	Organismal Systems	Endocrine system	ko04928//Parathyroid hormone synthesis, secretion and action	K08002	-	-	-
ncbi_113808651	3	5.58E-17	5.10E-16	Mad	Mothers against decapentaplegic [Daphnia magna]	Environmental Information Processing;Human Diseases;Environmental Information Processing;Cellular Processes;Environmental Information Processing	Signal transduction;Cancers;Signal transduction;Cellular community - eukaryotes;Signal transduction	ko04390//Hippo signaling pathway;ko05202//Transcriptional misregulation in cancers;ko04391//Hippo signaling pathway -fly;ko04550//Signaling pathways regulating pluripotency of stem cells;ko04350//TGF-beta signaling pathway	K04676;K04676;K04676;K04676;K04676	GO:0043231//intracellular membrane-bounded organelle;GO:0043234//protein complex	GO:0001071//nucleic acid binding transcription factor activity;GO:0005515//protein binding	GO:0007178//transmembrane receptor protein serine/threonine kinase signaling pathway;GO:0010468//regulation of gene expression;GO:0034645//cellular macromolecule biosynthetic process
ncbi_113808654	1	1.80E-198	7.79E-197	PDE8B	PREDICTED: high affinity cAMP-specific and IBMX-insensitive 3',5'-cyclic phosphodiesterase 8B-like [Hyalella azteca]	Metabolism;Human Diseases;Human Diseases;Organismal Systems	Nucleotide metabolism;Endocrine and metabolic diseases;Substance dependence;Endocrine system	ko00230//Purine metabolism;ko04934//Cushing syndrome;ko05032//Morphine addiction;ko04927//Cortisol synthesis and secretion	K18437;K18437;K18437;K18437	-	GO:0016787//hydrolase activity	GO:0044707//single-multicellular organism process
ncbi_113808705	2	0	0	RPL13	ribosomal protein L13 [Procambarus clarkii]	Genetic Information Processing	Translation	ko03010//Ribosome	K02873	-	-	-
ncbi_113808709	2	1.89E-10	1.38E-09	--	PREDICTED: nuclear receptor-binding factor 2-like isoform X1 [Nicrophorus vespilloides]	Cellular Processes	Transport and catabolism	ko04140//Autophagy - animal	K21246	-	-	-
ncbi_113808730	4	0	0	spp27	PREDICTED: upstream activation factor subunit spp27-like, partial [Hyalella azteca]	-	-	-	-	-	-	-
ncbi_113808727	4	4.78E-09	3.28E-08	ESRRB	estrogen-related receptor [Macrobrachium rosenbergii]	-	-	-	-	-	GO:0046872//metal ion binding;GO:0097159//organic cyclic compound binding	GO:0010467//gene expression;GO:0034645//cellular macromolecule biosynthetic process;GO:0050794//regulation of cellular process
ncbi_113808745	4	4.49E-09	3.09E-08	vav-1	PREDICTED: protein vav-1-like [Hyalella azteca]	-	-	-	-	-	-	-
ncbi_113808746	4	1.54E-09	1.08E-08	bet1l	PREDICTED: BET1-like protein [Galendromus occidentalis]	Genetic Information Processing	Folding, sorting and degradation	ko04130//SNARE interactions in vesicular transport	K08504	GO:0012505//endomembrane system;GO:0043231//intracellular membrane-bounded organelle;GO:0044444//cytoplasmic part	-	-
ncbi_113808760	4	1.83E-09	1.28E-08	rpusd1	RNA pseudouridylate synthase domain-containing protein 1 [Zootermopsis nevadensis]	-	-	-	-	-	-	-
ncbi_113808796	1	3.18E-21	3.26E-20	--	-	-	-	-	-	-	-	-
ncbi_113808839	2	4.52E-11	3.38E-10	FAM210A	Protein FAM210A, partial [Daphnia magna]	-	-	-	-	-	-	-
ncbi_113808848	3	6.20E-46	9.73E-45	KLF11	kruppel-like factor [Litopenaeus vannamei]	-	-	-	-	-	-	-
ncbi_113808854	3	9.36E-25	1.05E-23	--	-	-	-	-	-	-	-	-
ncbi_113808879	2	5.28E-44	8.07E-43	Ube2v2	PREDICTED: ubiquitin-conjugating enzyme E2 variant 2-like [Hyalella azteca]	Organismal Systems	Immune system	ko04624//Toll and Imd signaling pathway	K10704	-	-	-
ncbi_113808896	4	1.36E-16	1.23E-15	BRD7	PREDICTED: bromodomain-containing protein 7 isoform X1 [Agrilus planipennis]	Human Diseases	Cancers	ko05225//Hepatocellular carcinoma	K11723	-	-	-
ncbi_113808915	2	0	0	PSMB2	PREDICTED: proteasome subunit beta type-2-like [Hyalella azteca]	Genetic Information Processing	Folding, sorting and degradation	ko03050//Proteasome	K02734	GO:0044424//intracellular part	GO:0004175//endopeptidase activity	GO:0006508//proteolysis
ncbi_113808916	2	0	0	RPL23A	PREDICTED: 60S ribosomal protein L23a-like [Trichogramma pretiosum]	Genetic Information Processing	Translation	ko03010//Ribosome	K02893	GO:0030529//intracellular ribonucleoprotein complex	GO:0005198//structural molecule activity	GO:0010467//gene expression
ncbi_113808921	3	2.98E-48	4.84E-47	--	-	-	-	-	-	-	-	-
ncbi_113808955	2	1.04E-22	1.11E-21	Cnot4	CCR4-NOT transcription complex subunit 4 [Zootermopsis nevadensis]	Genetic Information Processing	Folding, sorting and degradation	ko03018//RNA degradation	K10643	-	-	-
ncbi_113808963	5	1.94E-19	1.90E-18	pcs	PREDICTED: SH3 domain-binding protein 5 homolog [Tribolium castaneum]	-	-	-	-	-	-	-
ncbi_113808968	2	0	0	--	-	-	-	-	-	-	-	-
ncbi_113808967	2	9.77E-138	3.33E-136	NDUFA6	AAEL000138-PA [Aedes aegypti]	Metabolism;Organismal Systems;Human Diseases;Human Diseases;Human Diseases;Human Diseases;Metabolism;Organismal Systems	Global and overview maps;Environmental adaptation;Neurodegenerative diseases;Neurodegenerative diseases;Endocrine and metabolic diseases;Neurodegenerative diseases;Energy metabolism;Nervous system	ko01100//Metabolic pathways;ko04714//Thermogenesis;ko05016//Huntington disease;ko05010//Alzheimer disease;ko04932//Non-alcoholic fatty liver disease (NAFLD);ko05012//Parkinson disease;ko00190//Oxidative phosphorylation;ko04723//Retrograde endocannabinoid signaling	K03950;K03950;K03950;K03950;K03950;K03950;K03950;K03950	-	-	-
ncbi_113808971	2	5.26E-83	1.24E-81	eef1akmt1	Lysine N-methyltransferase N6AMT2 [Daphnia magna]	-	-	-	-	-	GO:0016740//transferase activity	-
ncbi_113808972	5	1.30E-78	2.94E-77	--	-	-	-	-	-	-	-	-
ncbi_113808974	5	1.22E-13	1.00E-12	--	PREDICTED: UPF0184 protein AAEL002161-like [Nicrophorus vespilloides]	-	-	-	-	-	-	-
ncbi_113808957	4	0	0	--	PREDICTED: neurogenic locus notch homolog protein 1-like [Hyalella azteca]	-	-	-	-	-	-	-
ncbi_113808977	2	0	0	RpL37	PREDICTED: 60S ribosomal protein L37 [Cimex lectularius]	Genetic Information Processing	Translation	ko03010//Ribosome	K02922	GO:0030529//intracellular ribonucleoprotein complex	GO:0003723//RNA binding;GO:0005198//structural molecule activity;GO:0043169//cation binding	GO:0010467//gene expression
ncbi_113808989	4	4.54E-30	5.67E-29	Adk2	Adenylate kinase 2, mitochondrial [Daphnia magna]	Metabolism;Metabolism;Metabolism	Global and overview maps;Nucleotide metabolism;Metabolism of cofactors and vitamins	ko01100//Metabolic pathways;ko00230//Purine metabolism;ko00730//Thiamine metabolism	K00939;K00939;K00939	GO:0043231//intracellular membrane-bounded organelle	GO:0016301//kinase activity;GO:0016776//phosphotransferase activity, phosphate group as acceptor;GO:0032550//purine ribonucleoside binding	GO:0009152//purine ribonucleotide biosynthetic process
ncbi_113808992	3	5.42E-22	5.69E-21	--	PREDICTED: platelet binding protein GspB-like [Hyalella azteca]	Human Diseases;Cellular Processes	Cancers;Cell growth and death	ko05206//MicroRNAs in cancer;ko04115//p53 signaling pathway	K10127;K10127	-	GO:0005488//binding	GO:0019538//protein metabolic process;GO:0044763//single-organism cellular process;GO:0050794//regulation of cellular process
ncbi_113808997	1	0	0	PEN-3	penaeidin 3a.1 [Litopenaeus vannamei]	-	-	-	-	-	-	-
ncbi_113808998	1	0	0	PEN-3	antimicrobial peptide penaeidin 3 [Litopenaeus stylirostris]	-	-	-	-	-	-	-
ncbi_113809019	4	1.66E-84	3.95E-83	Tmed7	PREDICTED: transmembrane emp24 domain-containing protein 7-like [Nasonia vitripennis]	-	-	-	-	GO:0031224//intrinsic component of membrane	-	-
ncbi_113809022	4	0	0	--	-	-	-	-	-	-	-	-
ncbi_113809027	2	3.60E-36	4.93E-35	nol6	PREDICTED: nucleolar protein 6-like [Lingula anatina]	Genetic Information Processing	Translation	ko03008//Ribosome biogenesis in eukaryotes	K14544	-	-	-
ncbi_113809035	2	3.23E-190	1.34E-188	brk1-b	PREDICTED: probable protein BRICK1-B [Hyalella azteca]	Cellular Processes	Cell motility	ko04810//Regulation of actin cytoskeleton	K05752	GO:0043232//intracellular non-membrane-bounded organelle	-	-
ncbi_113809061	3	9.51E-20	9.40E-19	Gpsm2	G-protein signaling modulator, partial [Procambarus clarkii]	-	-	-	-	-	-	-
ncbi_113809062	2	8.42E-36	1.14E-34	ETFB	electron transfer flavoprotein subunit beta [Scylla paramamosain]	-	-	-	-	GO:0031988//membrane-bounded vesicle;GO:0044429//mitochondrial part	-	GO:0022900//electron transport chain
ncbi_113809067	2	6.11E-41	8.92E-40	ncl1	Nicalin-1 [Crassostrea gigas]	-	-	-	-	-	-	-
ncbi_113809069	4	2.78E-71	5.92E-70	--	AGAP012926-PA-like protein [Anopheles sinensis]	-	-	-	-	-	-	-
ncbi_113809068	2	5.28E-37	7.32E-36	TIPRL	PREDICTED: TIP41-like protein [Dufourea novaeangliae]	-	-	-	-	-	-	-
ncbi_113809088	1	8.10E-213	3.64E-211	PPAF2	serine proteinase [Eriocheir sinensis]	-	-	-	-	-	-	-
ncbi_113809076	1	0	0	PPAF2	serine proteinase 1 [Portunus trituberculatus]	-	-	-	-	-	-	-
ncbi_113809105	5	1.10E-08	7.42E-08	Bin1	PREDICTED: myc box-dependent-interacting protein 1 isoform X2 [Bombus terrestris]	Cellular Processes;Organismal Systems	Transport and catabolism;Immune system	ko04144//Endocytosis;ko04666//Fc gamma R-mediated phagocytosis	K12562;K12562	-	-	-
ncbi_113809108	2	0	0	ATP5L	ATP synthase subunit g [Palaemon varians]	Metabolism;Organismal Systems;Metabolism	Global and overview maps;Environmental adaptation;Energy metabolism	ko01100//Metabolic pathways;ko04714//Thermogenesis;ko00190//Oxidative phosphorylation	K02140;K02140;K02140	-	GO:0015077//monovalent inorganic cation transmembrane transporter activity	GO:0006754//ATP biosynthetic process
ncbi_113809111	2	2.29E-162	8.71E-161	eIF3i	PREDICTED: eukaryotic translation initiation factor 3 subunit I-like [Hyalella azteca]	Genetic Information Processing	Translation	ko03013//RNA transport	K03246	GO:0070993//translation preinitiation complex	-	GO:0006412//translation
ncbi_113809115	2	6.38E-234	3.09E-232	--	-	-	-	-	-	-	-	-
ncbi_113809133	2	1.55E-118	4.67E-117	mRpL52	PREDICTED: 39S ribosomal protein L52, mitochondrial [Tribolium castaneum]	-	-	-	-	GO:0005840//ribosome	-	-
ncbi_113809136	4	8.02E-10	5.70E-09	tmem201	PREDICTED: transmembrane protein 201-like [Hyalella azteca]	-	-	-	-	-	-	-
ncbi_113809137	2	2.31E-11	1.74E-10	Pecr	PREDICTED: peroxisomal trans-2-enoyl-CoA reductase-like isoform X1 [Hyalella azteca]	Cellular Processes;Metabolism	Transport and catabolism;Lipid metabolism	ko04146//Peroxisome;ko01040//Biosynthesis of unsaturated fatty acids	K07753;K07753	-	-	-
ncbi_113809138	2	0	0	Nme1	nm23 [Macrobrachium rosenbergii]	Metabolism;Metabolism;Metabolism;Metabolism	Global and overview maps;Nucleotide metabolism;Xenobiotics biodegradation and metabolism;Nucleotide metabolism	ko01100//Metabolic pathways;ko00230//Purine metabolism;ko00983//Drug metabolism - other enzymes;ko00240//Pyrimidine metabolism	K00940;K00940;K00940;K00940	-	GO:0016776//phosphotransferase activity, phosphate group as acceptor;GO:0032550//purine ribonucleoside binding	GO:0009132//nucleoside diphosphate metabolic process;GO:0009152//purine ribonucleotide biosynthetic process;GO:0009209//pyrimidine ribonucleoside triphosphate biosynthetic process
ncbi_113809140	2	8.96E-48	1.45E-46	Utp18	PREDICTED: U3 small nucleolar RNA-associated protein 18 homolog [Bemisia tabaci]	Genetic Information Processing	Translation	ko03008//Ribosome biogenesis in eukaryotes	K14553	-	-	-
ncbi_113809143	2	1.56E-237	7.59E-236	--	Zn-finger in Ran binding protein and others domain containing protein [Acanthamoeba castellanii str. Neff] [Acanthamoeba castellanii]	-	-	-	-	-	-	-
ncbi_113809150	5	3.36E-94	8.59E-93	Sacs	PREDICTED: sacsin-like [Acropora digitifera]	-	-	-	-	-	-	-
ncbi_113809151	2	4.45E-16	3.98E-15	--	PREDICTED: MATH and LRR domain-containing protein PFE0570w-like [Anoplophora glabripennis]	-	-	-	-	-	-	-
ncbi_113809156	3	9.26E-262	4.87E-260	--	PREDICTED: uncharacterized transmembrane protein DDB_G0289901-like [Hyalella azteca]	-	-	-	-	-	-	-
ncbi_113809161	4	8.78E-39	1.25E-37	E(z)	PREDICTED: histone-lysine N-methyltransferase EZH2-like isoform X2 [Hyalella azteca]	Human Diseases;Metabolism	Cancers;Amino acid metabolism	ko05206//MicroRNAs in cancer;ko00310//Lysine degradation	K11430;K11430	-	-	-
ncbi_113809166	2	1.17E-15	1.03E-14	--	PREDICTED: AF4/FMR2 family member 4-like [Octopus bimaculoides]	-	-	-	-	-	-	-
ncbi_113809176	5	1.74E-27	2.07E-26	Src64B	PREDICTED: tyrosine-protein kinase Src64B-like isoform X2 [Hyalella azteca]	Cellular Processes;Human Diseases;Cellular Processes;Cellular Processes;Organismal Systems;Cellular Processes;Environmental Information Processing;Organismal Systems;Environmental Information Processing;Cellular Processes;Organismal Systems;Human Diseases;Human Diseases;Human Diseases;Human Diseases;Human Diseases;Organismal Systems;Organismal Systems;Human Diseases;Organismal Systems;Cellular Pr…	Cellular community - eukaryotes;Cancers;Cell motility;Cellular community - eukaryotes;Endocrine system;Transport and catabolism;Signal transduction;Immune system;Signal transduction;Cellular community - eukaryotes;Endocrine system;Cardiovascular diseases;Infectious diseases;Infectious diseases;Cancers;Infectious diseases;Immune system;Endocrine system;Infectious diseases;Development;Cellular comm…	ko04510//Focal adhesion;ko05205//Proteoglycans in cancer;ko04810//Regulation of actin cytoskeleton;ko04530//Tight junction;ko04919//Thyroid hormone signaling pathway;ko04144//Endocytosis;ko04015//Rap1 signaling pathway;ko04611//Platelet activation;ko04013//MAPK signaling pathway - fly;ko04520//Adherens junction;ko04921//Oxytocin signaling pathway;ko05418//Fluid shear stress and atherosclerosis;ko…	K05704;K05704;K05704;K05704;K05704;K05704;K05704;K05704;K05704;K05704;K05704;K05704;K05704;K05704;K05704;K05704;K05704;K05704;K05704;K05704;K05704;K05704;K05704;K05704;K05704;K05704;K05704;K05704;K05704;K05704;K05704;K05704;K05704;K05704;K05704;K05704	-	-	-
ncbi_113809198	4	2.60E-20	2.61E-19	Gtf2h4	general transcription factor IIH subunit 4 [Penaeus monodon]	Human Diseases;Genetic Information Processing;Genetic Information Processing	Cancers;Replication and repair;Transcription	ko05203//Viral carcinogenesis;ko03420//Nucleotide excision repair;ko03022//Basal transcription factors	K03144;K03144;K03144	-	-	-
ncbi_113809200	2	0	0	--	transient receptor potential cation channel pyrexia [Homarus americanus]	-	-	-	-	-	-	-
ncbi_113809197	2	9.27E-102	2.49E-100	DYNLRB2	PREDICTED: dynein light chain roadblock-type 2-like [Hyalella azteca]	-	-	-	-	-	-	-
ncbi_113809213	3	1.41E-33	1.86E-32	Vha36-1	PREDICTED: V-type proton ATPase subunit D-like [Hyalella azteca]	Metabolism;Human Diseases;Cellular Processes;Environmental Information Processing;Human Diseases;Metabolism;Human Diseases;Organismal Systems;Human Diseases;Organismal Systems	Global and overview maps;Infectious diseases;Transport and catabolism;Signal transduction;Infectious diseases;Energy metabolism;Infectious diseases;Nervous system;Immune diseases;Excretory system	ko01100//Metabolic pathways;ko05165//Human papillomavirus infection;ko04145//Phagosome;ko04150//mTOR signaling pathway;ko05110//Vibrio cholerae infection;ko00190//Oxidative phosphorylation;ko05120//Epithelial cell signaling in Helicobacter pylori infection;ko04721//Synaptic vesicle cycle;ko05323//Rheumatoid arthritis;ko04966//Collecting duct acid secretion	K02149;K02149;K02149;K02149;K02149;K02149;K02149;K02149;K02149;K02149	-	-	-
ncbi_113809216	3	2.60E-30	3.26E-29	Atp6v1d	V-type proton ATPase subunit D [Monochamus alternatus]	Metabolism;Human Diseases;Cellular Processes;Environmental Information Processing;Human Diseases;Metabolism;Human Diseases;Organismal Systems;Human Diseases;Organismal Systems	Global and overview maps;Infectious diseases;Transport and catabolism;Signal transduction;Infectious diseases;Energy metabolism;Infectious diseases;Nervous system;Immune diseases;Excretory system	ko01100//Metabolic pathways;ko05165//Human papillomavirus infection;ko04145//Phagosome;ko04150//mTOR signaling pathway;ko05110//Vibrio cholerae infection;ko00190//Oxidative phosphorylation;ko05120//Epithelial cell signaling in Helicobacter pylori infection;ko04721//Synaptic vesicle cycle;ko05323//Rheumatoid arthritis;ko04966//Collecting duct acid secretion	K02149;K02149;K02149;K02149;K02149;K02149;K02149;K02149;K02149;K02149	-	-	-
ncbi_113809233	4	2.50E-14	2.12E-13	CHD1	PREDICTED: chromodomain-helicase-DNA-binding protein 1-like [Hyalella azteca]	-	-	-	-	-	-	-
ncbi_113809246	2	4.22E-72	9.05E-71	GINS3	PREDICTED: DNA replication complex GINS protein PSF3-like [Hyalella azteca]	-	-	-	-	-	-	-
ncbi_113809282	2	0	0	--	EB module family protein [Trichuris trichiura]	-	-	-	-	-	-	-
ncbi_113809284	5	1.62E-86	3.93E-85	--	-	-	-	-	-	-	-	-
ncbi_113809301	5	3.39E-39	4.84E-38	--	PREDICTED: histamine H2 receptor-like [Strongylocentrotus purpuratus]	Environmental Information Processing	Signaling molecules and interaction	ko04080//Neuroactive ligand-receptor interaction	K05053	-	-	-
ncbi_113809310	5	1.48E-190	6.15E-189	--	APOBEC1 complementation factor [Cricetulus griseus]	-	-	-	-	-	-	-
ncbi_113809313	5	5.14E-176	2.06E-174	--	PREDICTED: uncharacterized protein LOC108675177 [Hyalella azteca]	-	-	-	-	-	-	-
ncbi_113809324	2	2.82E-38	3.97E-37	mec-2	PREDICTED: band 7 protein AGAP004871-like isoform X1 [Diaphorina citri]	-	-	-	-	-	-	-
ncbi_113809331	2	4.66E-17	4.27E-16	Ttc27	PREDICTED: tetratricopeptide repeat protein 27-like [Hyalella azteca]	-	-	-	-	-	-	-
ncbi_113809334	4	1.76E-50	2.95E-49	--	PREDICTED: nucleoprotein TPR-like isoform X2 [Hyalella azteca]	Human Diseases;Genetic Information Processing;Human Diseases	Cancers;Translation;Cancers	ko05200//Pathways in cancer;ko03013//RNA transport;ko05216//Thyroid cancer	K09291;K09291;K09291	-	-	-
ncbi_113809352	3	0	0	--	single VWC domain protein 5 [Litopenaeus vannamei]	-	-	-	-	-	-	-
ncbi_113809356	4	1.48E-48	2.40E-47	csn8	PREDICTED: COP9 signalosome complex subunit 8-like [Lingula anatina]	-	-	-	-	GO:0044424//intracellular part	-	-
ncbi_113809385	4	7.06E-11	5.24E-10	Surf4	PREDICTED: surfeit locus protein 4-like [Hyalella azteca]	-	-	-	-	-	-	-
ncbi_113809388	2	0	0	SLC25A3	PREDICTED: phosphate carrier protein, mitochondrial-like [Hyalella azteca]	-	-	-	-	GO:0019866//organelle inner membrane;GO:0031224//intrinsic component of membrane;GO:0031988//membrane-bounded vesicle	GO:0005515//protein binding	GO:0044763//single-organism cellular process;GO:0051234//establishment of localization
ncbi_113809398	2	2.18E-27	2.59E-26	UMPS	PREDICTED: uridine 5'-monophosphate synthase-like [Hyalella azteca]	Metabolism;Metabolism;Metabolism	Global and overview maps;Xenobiotics biodegradation and metabolism;Nucleotide metabolism	ko01100//Metabolic pathways;ko00983//Drug metabolism - other enzymes;ko00240//Pyrimidine metabolism	K13421;K13421;K13421	-	GO:0003824//catalytic activity	GO:0044711//single-organism biosynthetic process;GO:0055086//nucleobase-containing small molecule metabolic process;GO:0072528//pyrimidine-containing compound biosynthetic process
ncbi_113809401	4	5.00E-142	1.75E-140	SEC61B	PREDICTED: protein transport protein Sec61 subunit beta [Polistes canadensis]	Genetic Information Processing;Cellular Processes;Human Diseases;Genetic Information Processing	Folding, sorting and degradation;Transport and catabolism;Infectious diseases;Folding, sorting and degradation	ko04141//Protein processing in endoplasmic reticulum;ko04145//Phagosome;ko05110//Vibrio cholerae infection;ko03060//Protein export	K09481;K09481;K09481;K09481	-	-	-
ncbi_113809399	2	5.79E-100	1.53E-98	acbd6	PREDICTED: acyl-CoA-binding domain-containing protein 6 [Takifugu rubripes]	-	-	-	-	-	-	-
ncbi_113809408	2	1.18E-11	9.03E-11	cdk9	cyclin-dependent kinase 9 (CDC2-related kinase), isoform CRA_d [Mus musculus]	Human Diseases	Cancers	ko05202//Transcriptional misregulation in cancers	K02211	GO:0008023//transcription elongation factor complex	GO:0000975//regulatory region DNA binding;GO:0003723//RNA binding;GO:0004674//protein serine/threonine kinase activity;GO:0005515//protein binding;GO:0032550//purine ribonucleoside binding	GO:0001934//positive regulation of protein phosphorylation;GO:0006355//regulation of transcription, DNA-templated;GO:0010605//negative regulation of macromolecule metabolic process;GO:0033184//positive regulation of histone ubiquitination;GO:0045934//negative regulation of nucleobase-containing compound metabolic process;GO:0048583//regulation of response to stimulus;GO:0051052//regulation of DNA…
ncbi_113809414	4	4.77E-09	3.28E-08	--	PREDICTED: centromere protein K [Strongylocentrotus purpuratus]	-	-	-	-	-	-	-
ncbi_113809416	2	0	0	--	PREDICTED: cellular nucleic acid-binding protein-like isoform X1 [Limulus polyphemus]	-	-	-	-	-	-	-
ncbi_113809417	2	0	0	rap1b	Rap GTPase [Marsupenaeus japonicus]	Cellular Processes;Cellular Processes;Environmental Information Processing;Organismal Systems;Environmental Information Processing;Organismal Systems;Environmental Information Processing;Environmental Information Processing;Organismal Systems;Human Diseases;Organismal Systems;Organismal Systems;Human Diseases;Organismal Systems	Cellular community - eukaryotes;Cellular community - eukaryotes;Signal transduction;Immune system;Signal transduction;Digestive system;Signal transduction;Signal transduction;Immune system;Endocrine and metabolic diseases;Immune system;Nervous system;Cancers;Nervous system	ko04510//Focal adhesion;ko04530//Tight junction;ko04015//Rap1 signaling pathway;ko04611//Platelet activation;ko04010//MAPK signaling pathway;ko04972//Pancreatic secretion;ko04024//cAMP signaling pathway;ko04014//Ras signaling pathway;ko04670//Leukocyte transendothelial migration;ko04934//Cushing syndrome;ko04062//Chemokine signaling pathway;ko04722//Neurotrophin signaling pathway;ko05211//Renal c…	K04353;K04353;K04353;K04353;K04353;K04353;K04353;K04353;K04353;K04353;K04353;K04353;K04353;K04353	-	-	-
ncbi_113809419	3	3.07E-11	2.31E-10	Hn	PREDICTED: protein henna-like [Hyalella azteca]	Metabolism;Metabolism;Metabolism;Metabolism;Metabolism	Global and overview maps;Global and overview maps;Metabolism of cofactors and vitamins;Amino acid metabolism;Amino acid metabolism	ko01100//Metabolic pathways;ko01230//Biosynthesis of amino acids;ko00790//Folate biosynthesis;ko00360//Phenylalanine metabolism;ko00400//Phenylalanine, tyrosine and tryptophan biosynthesis	K00500;K00500;K00500;K00500;K00500	-	GO:0016714//oxidoreductase activity, acting on paired donors, with incorporation or reduction of molecular oxygen, reduced pteridine as one donor, and incorporation of one atom of oxygen;GO:0031406//carboxylic acid binding;GO:0046914//transition metal ion binding	GO:0006558//L-phenylalanine metabolic process
ncbi_113809431	2	2.03E-44	3.12E-43	SGTA	secreted protein [Ixodes scapularis]	-	-	-	-	-	-	-
ncbi_113809436	3	7.59E-25	8.55E-24	--	PREDICTED: docking protein 2-like isoform X1 [Lingula anatina]	-	-	-	-	-	-	-
ncbi_113809437	2	1.20E-46	1.91E-45	--	PREDICTED: docking protein 2-like [Hyalella azteca]	-	-	-	-	-	-	-
ncbi_113809439	4	3.07E-09	2.14E-08	--	-	-	-	-	-	-	-	-
ncbi_113809449	2	6.23E-19	6.03E-18	SND1	Tudor staphylococcal nuclease [Penaeus monodon]	-	-	-	-	-	-	-
ncbi_113809502	2	5.18E-252	2.64E-250	Pabpc1	PREDICTED: polyadenylate-binding protein 4-like isoform X1 [Cephus cinctus]	Genetic Information Processing;Genetic Information Processing;Genetic Information Processing	Translation;Translation;Folding, sorting and degradation	ko03013//RNA transport;ko03015//mRNA surveillance pathway;ko03018//RNA degradation	K13126;K13126;K13126	-	-	-
ncbi_113809508	2	0	0	rps20	40S ribosomal protein S20 [Procambarus clarkii]	Genetic Information Processing	Translation	ko03010//Ribosome	K02969	GO:0044391//ribosomal subunit	GO:0005198//structural molecule activity	GO:0010467//gene expression
ncbi_113809511	3	1.22E-09	8.59E-09	--	PREDICTED: transmembrane protein 53 isoform X3 [Dendroctonus ponderosae]	-	-	-	-	-	-	-
ncbi_113809512	4	6.41E-32	8.25E-31	--	-	-	-	-	-	-	-	-
ncbi_113809459	2	1.74E-19	1.71E-18	--	-	-	-	-	-	-	-	-
ncbi_113809513	2	1.57E-27	1.87E-26	RIDA	PREDICTED: ribonuclease UK114-like [Acropora digitifera]	-	-	-	-	-	GO:0016787//hydrolase activity	GO:0008152//metabolic process
ncbi_113809517	2	0	0	RpS4	PREDICTED: 40S ribosomal protein S4 [Microplitis demolitor]	Genetic Information Processing	Translation	ko03010//Ribosome	K02987	GO:0030529//intracellular ribonucleoprotein complex	GO:0003723//RNA binding;GO:0005198//structural molecule activity	GO:0010467//gene expression
ncbi_113809520	4	1.18E-26	1.37E-25	arl6ip4	ADP-ribosylation factor-like protein 6-interacting protein 4 [Zootermopsis nevadensis]	-	-	-	-	-	-	-
ncbi_113809522	2	4.09E-80	9.38E-79	NOP12	PREDICTED: RNA-binding protein 34-like isoform X5 [Lingula anatina]	-	-	-	-	-	-	-
ncbi_113809524	2	0	0	Rbm34	PREDICTED: RNA-binding protein 34-like isoform X6 [Lingula anatina]	-	-	-	-	-	-	-
ncbi_113809546	1	0	0	--	-	-	-	-	-	-	-	-
ncbi_113809577	3	3.07E-09	2.14E-08	--	-	-	-	-	-	-	-	-
ncbi_113809589	5	7.12E-305	4.14E-303	Ras64B	Ras protein [Marsupenaeus japonicus]	Human Diseases;Cellular Processes;Human Diseases;Environmental Information Processing;Environmental Information Processing;Environmental Information Processing;Cellular Processes;Cellular Processes;Environmental Information Processing;Environmental Information Processing;Organismal Systems;Cellular Processes	Cancers;Cell motility;Infectious diseases;Signal transduction;Signal transduction;Signal transduction;Transport and catabolism;Cell growth and death;Signal transduction;Signal transduction;Immune system;Transport and catabolism	ko05205//Proteoglycans in cancer;ko04810//Regulation of actin cytoskeleton;ko05166//HTLV-I infection;ko04010//MAPK signaling pathway;ko04024//cAMP signaling pathway;ko04014//Ras signaling pathway;ko04140//Autophagy - animal;ko04218//Cellular senescence;ko04072//Phospholipase D signaling pathway;ko04371//Apelin signaling pathway;ko04625//C-type lectin receptor signaling pathway;ko04137//Mitophagy …	K07830;K07830;K07830;K07830;K07830;K07830;K07830;K07830;K07830;K07830;K07830;K07830	-	-	-
ncbi_113809592	4	1.94E-42	2.89E-41	ilf2	interleukin enhancer binding factor [Eriocheir sinensis]	-	-	-	-	-	GO:0003824//catalytic activity;GO:0032550//purine ribonucleoside binding	GO:0002376//immune system process
ncbi_113809606	4	4.65E-13	3.75E-12	lin52	PREDICTED: protein lin-52 homolog [Hyalella azteca]	-	-	-	-	-	-	-
ncbi_113809600	4	3.72E-10	2.68E-09	PDZD2	PREDICTED: tyrosine-protein phosphatase non-receptor type 13-like [Hyalella azteca]	-	-	-	-	-	-	-
ncbi_113809607	2	1.01E-84	2.40E-83	DCPS	PREDICTED: m7GpppX diphosphatase [Halyomorpha halys]	Genetic Information Processing	Folding, sorting and degradation	ko03018//RNA degradation	K12584	GO:0043231//intracellular membrane-bounded organelle	GO:0016787//hydrolase activity	GO:0009987//cellular process
ncbi_113809610	2	1.32E-21	1.37E-20	SLX4	Structure-specific endonuclease subunit SLX4 [Zootermopsis nevadensis]	Genetic Information Processing	Replication and repair	ko03460//Fanconi anemia pathway	K10484	GO:0044424//intracellular part	-	GO:0008152//metabolic process;GO:0009987//cellular process
ncbi_113809613	2	1.15E-65	2.32E-64	RtcB	PREDICTED: tRNA-splicing ligase RtcB homolog isoform X1 [Bemisia tabaci]	-	-	-	-	GO:0043234//protein complex	GO:0008452//RNA ligase activity;GO:0032550//purine ribonucleoside binding;GO:0043169//cation binding	GO:0000394//RNA splicing, via endonucleolytic cleavage and ligation;GO:0006399//tRNA metabolic process
ncbi_113809656	4	1.43E-20	1.45E-19	Taf12	PREDICTED: transcription initiation factor TFIID subunit 12-like [Hyalella azteca]	Genetic Information Processing	Transcription	ko03022//Basal transcription factors	K03126	-	-	-
ncbi_113809655	2	0	0	La	PREDICTED: la protein homolog [Hyalella azteca]	-	-	-	-	-	-	-
ncbi_113809657	2	2.98E-52	5.12E-51	Rbmx2	RNA recognition motif-containing protein [Sarcoptes scabiei]	-	-	-	-	-	-	-
ncbi_113809658	2	7.14E-16	6.34E-15	MTX2	Metaxin-2 [Zootermopsis nevadensis]	-	-	-	-	-	-	-
ncbi_113809673	4	5.47E-09	3.74E-08	--	G protein suppressor 2 [Litopenaeus vannamei]	-	-	-	-	-	-	-
ncbi_113809687	1	2.89E-156	1.09E-154	A2M	alpha 2 macroglobulin [Litopenaeus vannamei]	Organismal Systems	Immune system	ko04610//Complement and coagulation cascades	K03910	-	-	-
ncbi_113809712	2	3.49E-24	3.86E-23	--	transcription factor ATF-b [Litopenaeus vannamei]	-	-	-	-	-	-	-
ncbi_113809714	3	1.33E-106	3.75E-105	--	transcription factor ATF-b [Litopenaeus vannamei]	-	-	-	-	-	-	-
ncbi_113809716	2	8.54E-10	6.06E-09	TSG101	tumor susceptibility protein 101-like protein [Procambarus clarkii]	Cellular Processes	Transport and catabolism	ko04144//Endocytosis	K12183	-	-	-
ncbi_113809718	2	1.45E-14	1.23E-13	spg21	Maspardin [Zootermopsis nevadensis]	Cellular Processes	Transport and catabolism	ko04144//Endocytosis	K19367	-	-	-
ncbi_113809721	4	9.70E-13	7.74E-12	--	PREDICTED: dolichol-phosphate mannosyltransferase subunit 3-like [Hyalella azteca]	Metabolism;Metabolism	Global and overview maps;Glycan biosynthesis and metabolism	ko01100//Metabolic pathways;ko00510//N-Glycan biosynthesis	K09659;K09659	-	-	-
ncbi_113809722	3	1.66E-30	2.09E-29	--	PREDICTED: uncharacterized protein LOC108667142 [Hyalella azteca]	-	-	-	-	-	-	-
ncbi_113809723	5	2.17E-12	1.71E-11	LEPROTL1	leptin receptor protein [Eriocheir sinensis]	-	-	-	-	-	-	-
ncbi_113809741	2	4.33E-30	5.41E-29	csn2	PREDICTED: COP9 signalosome complex subunit 2 [Athalia rosae]	-	-	-	-	-	-	-
ncbi_113809742	4	8.95E-13	7.16E-12	gatad1	PREDICTED: GATA zinc finger domain-containing protein 1-like [Limulus polyphemus]	-	-	-	-	-	-	-
ncbi_113809766	4	5.24E-21	5.34E-20	med6	PREDICTED: mediator of RNA polymerase II transcription subunit 6 [Trichogramma pretiosum]	-	-	-	-	-	-	-
ncbi_113809772	3	2.69E-17	2.49E-16	--	PREDICTED: neuroblast differentiation-associated protein AHNAK isoform X10 [Oryctolagus cuniculus]	-	-	-	-	GO:0044464//cell part	-	-
ncbi_113809777	1	8.94E-37	1.23E-35	AGL	PREDICTED: glycogen debranching enzyme-like isoform X2 [Hyalella azteca]	Metabolism;Metabolism	Global and overview maps;Carbohydrate metabolism	ko01100//Metabolic pathways;ko00500//Starch and sucrose metabolism	K01196;K01196	-	-	-
ncbi_113809784	3	1.90E-132	6.18E-131	--	-	-	-	-	-	-	-	-
ncbi_113809800	4	5.44E-09	3.72E-08	gpatch11	PREDICTED: G patch domain-containing protein 11 [Halyomorpha halys]	-	-	-	-	-	-	-
ncbi_113809801	2	1.84E-34	2.45E-33	BMS1	PREDICTED: ribosome biogenesis protein BMS1 homolog [Athalia rosae]	Genetic Information Processing	Translation	ko03008//Ribosome biogenesis in eukaryotes	K14569	-	-	-
ncbi_113809815	5	2.24E-140	7.75E-139	FAM49B	PREDICTED: protein FAM49B-like [Hyalella azteca]	-	-	-	-	-	-	-
ncbi_113809817	3	2.20E-24	2.44E-23	--	-	-	-	-	-	-	-	-
ncbi_113809828	4	1.12E-23	1.22E-22	MED25	PREDICTED: mediator of RNA polymerase II transcription subunit 25-like [Dendroctonus ponderosae]	-	-	-	-	-	-	-
ncbi_113809844	5	7.78E-11	5.76E-10	Rho1	RhoA [Marsupenaeus japonicus]	Human Diseases;Cellular Processes;Human Diseases;Cellular Processes;Cellular Processes;Cellular Processes;Environmental Information Processing;Organismal Systems;Cellular Processes;Organismal Systems;Human Diseases;Environmental Information Processing;Human Diseases;Human Diseases;Human Diseases;Organismal Systems;Environmental Information Processing;Environmental Information Processing;Human Dis…	Cancers;Cellular community - eukaryotes;Cancers;Cell motility;Cellular community - eukaryotes;Transport and catabolism;Signal transduction;Immune system;Cellular community - eukaryotes;Endocrine system;Cardiovascular diseases;Signal transduction;Infectious diseases;Cancers;Infectious diseases;Digestive system;Signal transduction;Signal transduction;Cancers;Signal transduction;Immune system;Signal…	ko05200//Pathways in cancer;ko04510//Focal adhesion;ko05205//Proteoglycans in cancer;ko04810//Regulation of actin cytoskeleton;ko04530//Tight junction;ko04144//Endocytosis;ko04015//Rap1 signaling pathway;ko04611//Platelet activation;ko04520//Adherens junction;ko04921//Oxytocin signaling pathway;ko05418//Fluid shear stress and atherosclerosis;ko04150//mTOR signaling pathway;ko05130//Pathogenic Esc…	K04513;K04513;K04513;K04513;K04513;K04513;K04513;K04513;K04513;K04513;K04513;K04513;K04513;K04513;K04513;K04513;K04513;K04513;K04513;K04513;K04513;K04513;K04513;K04513;K04513;K04513;K04513;K04513;K04513;K04513;K04513;K04513;K04513;K04513;K04513;K04513;K04513	-	-	-
ncbi_113809836	4	1.17E-13	9.63E-13	nrarp	Notch-regulated ankyrin repeat-containing protein, partial [Stegodyphus mimosarum]	-	-	-	-	-	-	GO:0007166//cell surface receptor signaling pathway;GO:0048646//anatomical structure formation involved in morphogenesis;GO:0048731//system development
ncbi_113809849	4	7.13E-10	5.08E-09	--	PREDICTED: ras suppressor protein 1-like [Hyalella azteca]	-	-	-	-	-	-	-
ncbi_113809853	2	1.27E-22	1.35E-21	ATPAF2	PREDICTED: ATP synthase mitochondrial F1 complex assembly factor 2-like isoform X1 [Hyalella azteca]	-	-	-	-	-	-	-
ncbi_113809867	1	5.72E-45	8.83E-44	--	-	-	-	-	-	-	-	-
ncbi_113809896	5	0	0	--	hemocyte homeostasis-associated protein [Litopenaeus vannamei]	-	-	-	-	-	-	-
ncbi_113809899	3	1.71E-14	1.46E-13	MTFP1	Mitochondrial 18 kDa protein-like protein [Zootermopsis nevadensis]	-	-	-	-	-	-	-
ncbi_113809903	2	7.08E-140	2.43E-138	--	-	-	-	-	-	-	-	-
ncbi_113809880	2	0	0	NPM3	PREDICTED: nucleoplasmin-like protein ANO39 isoform X2 [Hyalella azteca]	-	-	-	-	-	-	-
ncbi_113809887	5	7.17E-43	1.08E-41	ZFY	Zinc finger and BTB domain-containing protein 49, partial [Ophiophagus hannah]	-	-	-	-	-	-	-
ncbi_113809922	3	3.67E-11	2.75E-10	--	Proton-coupled folate transporter [Orchesella cincta]	-	-	-	-	-	-	-
ncbi_113809924	4	6.14E-18	5.79E-17	--	-	-	-	-	-	-	-	-
ncbi_113809927	4	1.37E-51	2.34E-50	PPM1B	protein phosphatase 1B [Marsupenaeus japonicus]	Environmental Information Processing;Environmental Information Processing	Signal transduction;Signal transduction	ko04013//MAPK signaling pathway - fly;ko04010//MAPK signaling pathway	K04461;K04461	-	-	-
ncbi_113809937	3	1.34E-27	1.60E-26	--	-	-	-	-	-	-	-	-
ncbi_113809962	5	1.43E-20	1.44E-19	Nol10	PREDICTED: nucleolar protein 10 [Athalia rosae]	-	-	-	-	-	-	-
ncbi_113809969	2	5.81E-87	1.41E-85	TRIT1	PREDICTED: tRNA dimethylallyltransferase, mitochondrial isoform X2 [Athalia rosae]	Metabolism	Global and overview maps	ko01100//Metabolic pathways	K00791	-	-	GO:0006399//tRNA metabolic process
ncbi_113809991	3	1.26E-133	4.14E-132	ImpL3	lactate dehydrogenase [Litopenaeus vannamei]	Metabolism;Metabolism;Environmental Information Processing;Organismal Systems;Human Diseases;Metabolism;Metabolism;Metabolism	Global and overview maps;Carbohydrate metabolism;Signal transduction;Endocrine system;Cancers;Amino acid metabolism;Carbohydrate metabolism;Carbohydrate metabolism	ko01100//Metabolic pathways;ko00010//Glycolysis / Gluconeogenesis;ko04066//HIF-1 signaling pathway;ko04922//Glucagon signaling pathway;ko05230//Central carbon metabolism in cancer;ko00270//Cysteine and methionine metabolism;ko00620//Pyruvate metabolism;ko00640//Propanoate metabolism	K00016;K00016;K00016;K00016;K00016;K00016;K00016;K00016	GO:0044424//intracellular part	GO:0004457//lactate dehydrogenase activity	GO:0005975//carbohydrate metabolic process;GO:0044710//single-organism metabolic process
ncbi_113809995	5	6.91E-15	5.96E-14	WDR44	PREDICTED: WD repeat-containing protein 44 [Orussus abietinus]	-	-	-	-	-	-	-
ncbi_113810007	4	1.75E-19	1.72E-18	NOVA2	PREDICTED: RNA-binding protein Nova-1 isoform X7 [Orussus abietinus]	-	-	-	-	-	-	-
ncbi_113810014	2	1.28E-61	2.49E-60	--	-	-	-	-	-	-	-	-
ncbi_113810015	2	1.76E-22	1.87E-21	--	-	-	-	-	-	-	-	-
ncbi_113810024	3	0	0	--	chitin binding-like protein [Fenneropenaeus chinensis]	-	-	-	-	-	-	-
ncbi_113810041	2	2.09E-91	5.23E-90	CG11007	PREDICTED: thioredoxin-related transmembrane protein 2 homolog [Hyalella azteca]	-	-	-	-	-	-	-
ncbi_113810042	2	1.67E-22	1.77E-21	--	PREDICTED: metaxin-1 isoform X3 [Halyomorpha halys]	-	-	-	-	-	-	-
ncbi_113810025	3	1.71E-76	3.81E-75	--	PREDICTED: beta-2 adrenergic receptor-like [Neolamprologus brichardi]	-	-	-	-	-	-	-
ncbi_113810027	3	8.61E-74	1.87E-72	--	PREDICTED: beta-2 adrenergic receptor-like [Sinocyclocheilus rhinocerous]	-	-	-	-	-	-	-
ncbi_113810046	2	1.74E-101	4.67E-100	HADH	PREDICTED: hydroxyacyl-coenzyme A dehydrogenase, mitochondrial-like [Lingula anatina]	Metabolism;Metabolism;Metabolism;Metabolism;Metabolism;Metabolism;Metabolism;Metabolism	Global and overview maps;Amino acid metabolism;Amino acid metabolism;Lipid metabolism;Global and overview maps;Amino acid metabolism;Carbohydrate metabolism;Lipid metabolism	ko01100//Metabolic pathways;ko00310//Lysine degradation;ko00280//Valine, leucine and isoleucine degradation;ko00071//Fatty acid degradation;ko01212//Fatty acid metabolism;ko00380//Tryptophan metabolism;ko00650//Butanoate metabolism;ko00062//Fatty acid elongation	K00022;K00022;K00022;K00022;K00022;K00022;K00022;K00022	-	GO:0016614//oxidoreductase activity, acting on CH-OH group of donors;GO:0043168//anion binding;GO:0048037//cofactor binding	GO:0032787//monocarboxylic acid metabolic process
ncbi_113810050	2	0	0	RPS15	PREDICTED: 40S ribosomal protein S15-like [Branchiostoma belcheri]	Genetic Information Processing	Translation	ko03010//Ribosome	K02958	GO:0044391//ribosomal subunit	GO:0005198//structural molecule activity	GO:0010467//gene expression
ncbi_113810058	2	0	0	psma2	PREDICTED: proteasome subunit alpha type-2 [Dendroctonus ponderosae]	Genetic Information Processing	Folding, sorting and degradation	ko03050//Proteasome	K02726	GO:0043231//intracellular membrane-bounded organelle;GO:0043234//protein complex	GO:0004175//endopeptidase activity	GO:0019941//modification-dependent protein catabolic process
ncbi_113810074	2	8.64E-70	1.82E-68	RPS14	ribosome like protein [Marsupenaeus japonicus]	Genetic Information Processing	Translation	ko03010//Ribosome	K02955	GO:0030529//intracellular ribonucleoprotein complex	-	GO:0010467//gene expression
ncbi_113810089	4	3.56E-101	9.50E-100	HNRNPR	PREDICTED: heterogeneous nuclear ribonucleoprotein R isoform X2 [Monomorium pharaonis]	-	-	-	-	-	-	-
ncbi_113810108	3	0	0	--	anti-lipopolysaccharide factor isoform 6 [Penaeus monodon]	-	-	-	-	-	-	-
ncbi_113810113	2	0	0	ATPsynB	F0-ATP synthase b-chain [Litopenaeus vannamei]	Metabolism;Organismal Systems;Human Diseases;Human Diseases;Human Diseases;Metabolism	Global and overview maps;Environmental adaptation;Neurodegenerative diseases;Neurodegenerative diseases;Neurodegenerative diseases;Energy metabolism	ko01100//Metabolic pathways;ko04714//Thermogenesis;ko05016//Huntington disease;ko05010//Alzheimer disease;ko05012//Parkinson disease;ko00190//Oxidative phosphorylation	K02127;K02127;K02127;K02127;K02127;K02127	-	-	-
ncbi_113810120	2	3.91E-10	2.82E-09	Noa36	PREDICTED: zinc finger protein 330 homolog [Agrilus planipennis]	-	-	-	-	-	-	-
ncbi_113810122	2	1.75E-264	9.31E-263	--	-	-	-	-	-	-	-	-
ncbi_113810126	3	6.34E-11	4.71E-10	SLC2A3	PREDICTED: solute carrier family 2, facilitated glucose transporter member 1-like isoform X2 [Cephus cinctus]	-	-	-	-	-	-	-
ncbi_113810138	4	1.39E-23	1.51E-22	ncaph	Condensin complex subunit [Daphnia magna]	-	-	-	-	-	-	-
ncbi_113810146	2	0	0	RpL31	60S ribosomal protein L31, partial [Stegodyphus mimosarum]	Genetic Information Processing	Translation	ko03010//Ribosome	K02910	GO:0030529//intracellular ribonucleoprotein complex	-	GO:0010467//gene expression
ncbi_113810148	2	0	0	RPLP2	60S acidic ribosomal protein P2-like protein [Scylla paramamosain]	Genetic Information Processing	Translation	ko03010//Ribosome	K02943	GO:0005840//ribosome	-	GO:0010467//gene expression;GO:0034645//cellular macromolecule biosynthetic process
ncbi_113810169	2	3.80E-44	5.81E-43	ZK1073.1	n-myc downstream regulated [Daphnia magna]	-	-	-	-	-	-	-
ncbi_113810170	4	7.51E-39	1.07E-37	Actr3	PREDICTED: actin-related protein 3-like [Hyalella azteca]	Cellular Processes	Cellular community - eukaryotes	ko04530//Tight junction	K18584	GO:0043232//intracellular non-membrane-bounded organelle;GO:0043234//protein complex	-	GO:0045010//actin nucleation
ncbi_113810206	2	2.35E-153	8.65E-152	Klhdc4	Kelch domain-containing protein 4 [Zootermopsis nevadensis]	-	-	-	-	-	-	-
ncbi_113810208	2	2.55E-253	1.30E-251	HINT2	PREDICTED: uncharacterized HIT-like protein Synpcc7942_1390 [Octopus bimaculoides]	-	-	-	-	-	-	-
ncbi_113810212	3	8.35E-21	8.47E-20	--	-	-	-	-	-	-	-	-
ncbi_113810214	3	0	0	--	-	-	-	-	-	-	-	-
ncbi_113810216	2	1.25E-50	2.11E-49	beta-PheRS	PREDICTED: phenylalanine--tRNA ligase beta subunit-like [Hyalella azteca]	Genetic Information Processing	Translation	ko00970//Aminoacyl-tRNA biosynthesis	K01890	-	GO:0005488//binding	-
ncbi_113810229	2	0	0	rps13	ribosomal protein S13, partial [Microcosmus squamiger]	Genetic Information Processing	Translation	ko03010//Ribosome	K02953	GO:0030529//intracellular ribonucleoprotein complex;GO:0043232//intracellular non-membrane-bounded organelle	GO:0005198//structural molecule activity	GO:0010467//gene expression
ncbi_113810232	3	5.08E-20	5.06E-19	--	-	-	-	-	-	-	-	-
ncbi_113810233	2	6.82E-102	1.84E-100	--	-	-	-	-	-	-	-	-
ncbi_113810234	2	4.67E-19	4.53E-18	--	-	-	-	-	-	-	-	-
ncbi_113810244	4	2.65E-13	2.16E-12	Pigo	PREDICTED: GPI ethanolamine phosphate transferase 3-like [Lingula anatina]	Metabolism;Metabolism	Global and overview maps;Glycan biosynthesis and metabolism	ko01100//Metabolic pathways;ko00563//Glycosylphosphatidylinositol(GPI)-anchor biosynthesis	K05288;K05288	-	-	-
ncbi_113810260	2	6.22E-12	4.82E-11	--	GH20308p [Drosophila melanogaster]	-	-	-	-	-	-	-
ncbi_113810265	4	8.61E-11	6.36E-10	SENP1	PREDICTED: sentrin-specific protease 1-like [Limulus polyphemus]	-	-	-	-	-	-	-
ncbi_113810268	3	0	0	nrv2	sodium potassium-transporting ATPase subunit beta [Litopenaeus vannamei]	Organismal Systems;Organismal Systems;Environmental Information Processing;Organismal Systems;Environmental Information Processing;Organismal Systems;Organismal Systems;Organismal Systems;Organismal Systems;Organismal Systems;Organismal Systems;Organismal Systems;Organismal Systems;Organismal Systems;Organismal Systems;Organismal Systems;Organismal Systems;Organismal Systems	Endocrine system;Digestive system;Signal transduction;Circulatory system;Signal transduction;Digestive system;Digestive system;Circulatory system;Digestive system;Digestive system;Endocrine system;Endocrine system;Endocrine system;Digestive system;Excretory system;Excretory system;Digestive system;Excretory system	ko04919//Thyroid hormone signaling pathway;ko04972//Pancreatic secretion;ko04022//cGMP - PKG signaling pathway;ko04261//Adrenergic signaling in cardiomyocytes;ko04024//cAMP signaling pathway;ko04971//Gastric acid secretion;ko04974//Protein digestion and absorption;ko04260//Cardiac muscle contraction;ko04976//Bile secretion;ko04970//Salivary secretion;ko04911//Insulin secretion;ko04918//Thyroid ho…	K01540;K01540;K01540;K01540;K01540;K01540;K01540;K01540;K01540;K01540;K01540;K01540;K01540;K01540;K01540;K01540;K01540;K01540	-	-	-
ncbi_113810269	4	5.92E-30	7.37E-29	THOC3	PREDICTED: THO complex subunit 3-like [Hyalella azteca]	Genetic Information Processing;Genetic Information Processing	Translation;Transcription	ko03013//RNA transport;ko03040//Spliceosome	K12880;K12880	-	-	-
ncbi_113810270	2	0	0	CCT7	chaperonin [Macrobrachium rosenbergii]	-	-	-	-	GO:0015630//microtubule cytoskeleton;GO:0031988//membrane-bounded vesicle;GO:0043231//intracellular membrane-bounded organelle;GO:0043234//protein complex	GO:0005515//protein binding;GO:0032550//purine ribonucleoside binding	GO:0006810//transport;GO:0035036//sperm-egg recognition;GO:0044267//cellular protein metabolic process
ncbi_113810290	3	0	0	--	-	-	-	-	-	-	-	-
ncbi_113810333	2	6.36E-22	6.67E-21	--	PREDICTED: DNA-directed RNA polymerase II subunit GRINL1A [Bombus impatiens]	-	-	-	-	-	-	-
ncbi_113810366	3	5.92E-275	3.17E-273	NAGA	Alpha-N-acetylgalactosaminidase [Harpegnathos saltator]	Metabolism;Cellular Processes;Metabolism	Global and overview maps;Transport and catabolism;Glycan biosynthesis and metabolism	ko01100//Metabolic pathways;ko04142//Lysosome;ko00603//Glycosphingolipid biosynthesis - globo and isoglobo series	K01204;K01204;K01204	-	-	-
ncbi_113810367	1	4.05E-11	3.03E-10	sws	PREDICTED: neuropathy target esterase sws isoform X3 [Apis florea]	Metabolism	Lipid metabolism	ko00564//Glycerophospholipid metabolism	K14676	-	-	-
ncbi_113810417	2	0	0	--	-	-	-	-	-	-	-	-
ncbi_113810419	1	5.04E-95	1.30E-93	--	Juvenile hormone-inducible protein [Culex quinquefasciatus]	-	-	-	-	-	-	-
ncbi_113810420	1	3.06E-82	7.15E-81	--	AGAP003123-PA [Anopheles gambiae str. PEST] [Anopheles gambiae]	-	-	-	-	-	-	-
ncbi_113810427	4	6.87E-36	9.36E-35	Ylpm1	PREDICTED: YLP motif-containing protein 1-like [Limulus polyphemus]	-	-	-	-	-	-	-
ncbi_113810450	5	2.01E-43	3.04E-42	Flrt2	PREDICTED: leucine-rich repeat neuronal protein 1-like [Hyalella azteca]	-	-	-	-	-	-	-
ncbi_113810460	3	7.74E-11	5.73E-10	--	PREDICTED: decapping and exoribonuclease protein [Microplitis demolitor]	-	-	-	-	-	-	-
ncbi_113810471	4	5.03E-23	5.40E-22	--	-	-	-	-	-	-	-	-
ncbi_113810483	2	4.48E-10	3.22E-09	UGP2	PREDICTED: UTP--glucose-1-phosphate uridylyltransferase-like isoform X1 [Hyalella azteca]	Metabolism;Metabolism;Metabolism;Metabolism;Metabolism	Global and overview maps;Carbohydrate metabolism;Carbohydrate metabolism;Carbohydrate metabolism;Carbohydrate metabolism	ko01100//Metabolic pathways;ko00520//Amino sugar and nucleotide sugar metabolism;ko00040//Pentose and glucuronate interconversions;ko00500//Starch and sucrose metabolism;ko00052//Galactose metabolism	K00963;K00963;K00963;K00963;K00963	-	GO:0016779//nucleotidyltransferase activity	GO:0009225//nucleotide-sugar metabolic process
ncbi_113810485	4	8.92E-131	2.87E-129	FKBP2	PREDICTED: peptidyl-prolyl cis-trans isomerase FKBP2-like [Hyalella azteca]	-	-	-	-	-	GO:0016859//cis-trans isomerase activity	GO:0044267//cellular protein metabolic process
ncbi_113810556	2	2.80E-241	1.37E-239	CG6712	PREDICTED: ribosome production factor 1-like [Limulus polyphemus]	-	-	-	-	-	-	-
ncbi_113810558	2	0	0	Pdap1	PREDICTED: 28 kDa heat- and acid-stable phosphoprotein [Microplitis demolitor]	-	-	-	-	-	-	-
ncbi_113810575	1	0	0	--	protein spaetzle, partial [Cherax quadricarinatus]	Organismal Systems	Immune system	ko04624//Toll and Imd signaling pathway	K20694	-	-	-
ncbi_113810582	1	4.00E-17	3.68E-16	AdipoR	adiponectin receptor [Litopenaeus vannamei]	-	-	-	-	-	-	-
ncbi_113810594	2	8.01E-09	5.43E-08	FAM192A	PREDICTED: protein FAM192A isoform X1 [Dinoponera quadriceps]	-	-	-	-	-	-	-
ncbi_113810598	3	1.06E-214	4.79E-213	AAEL002464	PREDICTED: V-type proton ATPase subunit F-like [Hyalella azteca]	Metabolism;Human Diseases;Cellular Processes;Environmental Information Processing;Human Diseases;Metabolism;Human Diseases;Organismal Systems;Human Diseases;Organismal Systems	Global and overview maps;Infectious diseases;Transport and catabolism;Signal transduction;Infectious diseases;Energy metabolism;Infectious diseases;Nervous system;Immune diseases;Excretory system	ko01100//Metabolic pathways;ko05165//Human papillomavirus infection;ko04145//Phagosome;ko04150//mTOR signaling pathway;ko05110//Vibrio cholerae infection;ko00190//Oxidative phosphorylation;ko05120//Epithelial cell signaling in Helicobacter pylori infection;ko04721//Synaptic vesicle cycle;ko05323//Rheumatoid arthritis;ko04966//Collecting duct acid secretion	K02151;K02151;K02151;K02151;K02151;K02151;K02151;K02151;K02151;K02151	GO:0033176//proton-transporting V-type ATPase complex	GO:0015078//hydrogen ion transmembrane transporter activity	GO:0015988//energy coupled proton transmembrane transport, against electrochemical gradient
ncbi_113810599	2	0	0	rpl18a	PREDICTED: 60S ribosomal protein L18a isoform X1 [Protobothrops mucrosquamatus]	Genetic Information Processing	Translation	ko03010//Ribosome	K02882	GO:0015934//large ribosomal subunit	GO:0003723//RNA binding	GO:0010467//gene expression
ncbi_113810618	2	1.01E-09	7.14E-09	--	PREDICTED: heterochromatin protein 1-like [Fopius arisanus]	-	-	-	-	GO:0031981//nuclear lumen;GO:0032991//macromolecular complex;GO:0044427//chromosomal part	GO:0005515//protein binding	-
ncbi_113810627	2	1.21E-22	1.29E-21	cps-6	PREDICTED: endonuclease G, mitochondrial-like [Hyalella azteca]	Cellular Processes	Cell growth and death	ko04210//Apoptosis	K01173	-	-	-
ncbi_113810628	3	3.71E-13	3.01E-12	NTPCR	PREDICTED: cancer-related nucleoside-triphosphatase [Camelus bactrianus]	Metabolism;Metabolism;Metabolism	Global and overview maps;Nucleotide metabolism;Metabolism of cofactors and vitamins	ko01100//Metabolic pathways;ko00230//Purine metabolism;ko00730//Thiamine metabolism	K06928;K06928;K06928	-	GO:0097159//organic cyclic compound binding;GO:1901363//heterocyclic compound binding	-
ncbi_113810631	4	2.06E-106	5.77E-105	DNAJC3	PREDICTED: dnaJ homolog subfamily C member 3-like [Hyalella azteca]	Genetic Information Processing;Human Diseases	Folding, sorting and degradation;Infectious diseases	ko04141//Protein processing in endoplasmic reticulum;ko05164//Influenza A	K09523;K09523	-	-	-
ncbi_113810645	3	3.88E-48	6.29E-47	--	PREDICTED: E3 ubiquitin-protein ligase TRIM71-like [Strongylocentrotus purpuratus]	-	-	-	-	-	-	-
ncbi_113810692	5	4.86E-47	7.76E-46	--	PREDICTED: CKLF-like MARVEL transmembrane domain-containing protein 4 [Anolis carolinensis]	-	-	-	-	-	-	-
ncbi_113810712	4	1.20E-56	2.18E-55	Actn	PREDICTED: alpha-actinin, sarcomeric-like isoform X2 [Hyalella azteca]	Cellular Processes;Cellular Processes;Cellular Processes;Cellular Processes;Human Diseases;Organismal Systems;Human Diseases;Human Diseases	Cellular community - eukaryotes;Cell motility;Cellular community - eukaryotes;Cellular community - eukaryotes;Cancers;Immune system;Infectious diseases;Immune diseases	ko04510//Focal adhesion;ko04810//Regulation of actin cytoskeleton;ko04530//Tight junction;ko04520//Adherens junction;ko05203//Viral carcinogenesis;ko04670//Leukocyte transendothelial migration;ko05146//Amoebiasis;ko05322//Systemic lupus erythematosus	K05699;K05699;K05699;K05699;K05699;K05699;K05699;K05699	-	-	-
ncbi_113810722	2	0	0	AGAP006782	adenine nucleotide translocase 2 [Litopenaeus vannamei]	Human Diseases;Human Diseases;Human Diseases;Environmental Information Processing;Cellular Processes;Human Diseases;Environmental Information Processing;Cellular Processes	Neurodegenerative diseases;Infectious diseases;Infectious diseases;Signal transduction;Cell growth and death;Neurodegenerative diseases;Signal transduction;Cell growth and death	ko05016//Huntington disease;ko05164//Influenza A;ko05166//HTLV-I infection;ko04022//cGMP - PKG signaling pathway;ko04217//Necroptosis;ko05012//Parkinson disease;ko04020//Calcium signaling pathway;ko04218//Cellular senescence	K05863;K05863;K05863;K05863;K05863;K05863;K05863;K05863	-	-	-
ncbi_113810727	3	2.68E-45	4.16E-44	DNAJC7	PREDICTED: dnaJ homolog subfamily C member 7-like isoform X3 [Hyalella azteca]	-	-	-	-	-	-	-
ncbi_113810733	2	0	0	--	-	-	-	-	-	-	-	-
ncbi_113810732	4	4.34E-13	3.51E-12	TAF5	PREDICTED: transcription initiation factor TFIID subunit 5-like isoform X2 [Hyalella azteca]	Human Diseases;Genetic Information Processing	Infectious diseases;Transcription	ko05168//Herpes simplex infection;ko03022//Basal transcription factors	K03130;K03130	-	-	-
ncbi_113810740	2	0	0	--	-	-	-	-	-	-	-	-
ncbi_113810771	2	2.73E-31	3.49E-30	--	-	-	-	-	-	-	-	-
ncbi_113810783	4	1.89E-60	3.61E-59	--	PREDICTED: zinc finger protein 2 homolog [Hyalella azteca]	-	-	-	-	-	-	-
ncbi_113810790	4	1.74E-23	1.89E-22	--	Septin-12, partial [Stegodyphus mimosarum]	-	-	-	-	-	-	-
ncbi_113810818	2	5.57E-10	3.99E-09	ALKBH4	PREDICTED: alpha-ketoglutarate-dependent dioxygenase alkB homolog 4-like [Hyalella azteca]	-	-	-	-	-	-	-
ncbi_113810820	2	9.43E-85	2.25E-83	tmem256	PREDICTED: transmembrane protein 256 homolog isoform X1 [Hyalella azteca]	-	-	-	-	-	-	GO:0006812//cation transport
ncbi_113810834	1	6.36E-62	1.24E-60	--	-	-	-	-	-	-	-	-
ncbi_113810831	2	3.02E-09	2.10E-08	Exo1	PREDICTED: exonuclease 1-like isoform X2 [Hyalella azteca]	Genetic Information Processing	Replication and repair	ko03430//Mismatch repair	K10746	-	-	-
ncbi_113810839	1	5.83E-133	1.91E-131	--	-	-	-	-	-	-	-	-
ncbi_113810844	1	0	0	--	-	-	-	-	-	-	-	-
ncbi_113810845	3	8.87E-24	9.72E-23	--	megator [Danaus plexippus]	-	-	-	-	-	-	-
ncbi_113810846	3	4.14E-69	8.64E-68	--	-	-	-	-	-	-	-	-
ncbi_113810842	2	0	0	SmD1	AGAP007246-PA [Anopheles gambiae str. PEST] [Anopheles gambiae]	Genetic Information Processing;Human Diseases	Transcription;Immune diseases	ko03040//Spliceosome;ko05322//Systemic lupus erythematosus	K11087;K11087	GO:0005681//spliceosomal complex;GO:0044444//cytoplasmic part	-	GO:0000377//RNA splicing, via transesterification reactions with bulged adenosine as nucleophile
ncbi_113810853	2	1.90E-33	2.49E-32	ACO2	PREDICTED: aconitate hydratase, mitochondrial-like [Hyalella azteca]	Metabolism;Metabolism;Metabolism;Metabolism;Metabolism;Metabolism	Global and overview maps;Global and overview maps;Global and overview maps;Carbohydrate metabolism;Carbohydrate metabolism;Global and overview maps	ko01100//Metabolic pathways;ko01200//Carbon metabolism;ko01230//Biosynthesis of amino acids;ko00020//Citrate cycle (TCA cycle);ko00630//Glyoxylate and dicarboxylate metabolism;ko01210//2-Oxocarboxylic acid metabolism	K01681;K01681;K01681;K01681;K01681;K01681	-	-	-
ncbi_113810854	2	0	0	Cct8	PREDICTED: T-complex protein 1 subunit theta-like [Hyalella azteca]	-	-	-	-	GO:0044424//intracellular part	GO:0005515//protein binding;GO:0032550//purine ribonucleoside binding	GO:0044267//cellular protein metabolic process
ncbi_113810863	2	3.38E-42	5.03E-41	Etfa	PREDICTED: electron transfer flavoprotein subunit alpha, mitochondrial-like [Hyalella azteca]	-	-	-	-	-	GO:0000166//nucleotide binding	-
ncbi_113810869	4	1.21E-125	3.79E-124	Lsm5	PREDICTED: U6 snRNA-associated Sm-like protein LSm5 [Hyalella azteca]	Genetic Information Processing;Genetic Information Processing	Transcription;Folding, sorting and degradation	ko03040//Spliceosome;ko03018//RNA degradation	K12624;K12624	-	-	-
ncbi_113810876	4	4.69E-42	6.97E-41	supt6h	PREDICTED: transcription elongation factor SPT6-like [Hyalella azteca]	-	-	-	-	-	-	GO:0006139//nucleobase-containing compound metabolic process;GO:0010467//gene expression;GO:0034645//cellular macromolecule biosynthetic process
ncbi_113810872	3	5.44E-131	1.75E-129	Tspan1	PREDICTED: CD9 antigen-like [Hyalella azteca]	Human Diseases;Organismal Systems;Human Diseases	Infectious diseases;Immune system;Infectious diseases	ko05160//Hepatitis C;ko04662//B cell receptor signaling pathway;ko05144//Malaria	K06508;K06508;K06508	GO:0016020//membrane	-	-
ncbi_113810905	1	0	0	--	PREDICTED: WW domain-containing protein C660.06-like [Hyalella azteca]	-	-	-	-	-	-	-
ncbi_113810909	1	6.06E-297	3.45E-295	--	PREDICTED: WW domain-containing protein C660.06-like [Hyalella azteca]	-	-	-	-	-	-	-
ncbi_113810906	1	1.81E-45	2.82E-44	--	PREDICTED: WW domain-containing protein C660.06-like [Hyalella azteca]	-	-	-	-	-	-	-
ncbi_113810907	1	5.58E-139	1.91E-137	--	PREDICTED: WW domain-containing protein C660.06-like [Hyalella azteca]	-	-	-	-	-	-	-
ncbi_113810910	1	0	0	--	-	-	-	-	-	-	-	-
ncbi_113810912	1	3.75E-21	3.84E-20	--	PREDICTED: WW domain-containing protein C660.06-like [Hyalella azteca]	-	-	-	-	-	-	-
ncbi_113810911	1	2.72E-18	2.59E-17	--	PREDICTED: WW domain-containing protein C660.06-like [Hyalella azteca]	-	-	-	-	-	-	-
ncbi_113810916	3	4.44E-20	4.43E-19	--	PREDICTED: delta(7)-sterol 5(6)-desaturase erg32-like isoform X1 [Hyalella azteca]	-	-	-	-	-	-	-
ncbi_113810921	3	1.59E-31	2.04E-30	--	-	-	-	-	-	-	-	-
ncbi_113810936	2	8.54E-41	1.24E-39	Fmc1	PREDICTED: UPF0562 protein C7orf55 homolog [Aethina tumida]	-	-	-	-	-	-	-
ncbi_113810942	2	8.91E-25	1.00E-23	Nrdc	PREDICTED: nardilysin-like [Athalia rosae]	-	-	-	-	-	-	-
ncbi_113810944	2	1.13E-54	2.00E-53	COQ7	PREDICTED: 5-demethoxyubiquinone hydroxylase, mitochondrial-like [Hyalella azteca]	Metabolism;Metabolism	Global and overview maps;Metabolism of cofactors and vitamins	ko01100//Metabolic pathways;ko00130//Ubiquinone and other terpenoid-quinone biosynthesis	K06134;K06134	-	-	GO:0044710//single-organism metabolic process
ncbi_113810957	1	1.45E-23	1.58E-22	Bsg	PREDICTED: basigin-like isoform X1 [Limulus polyphemus]	-	-	-	-	-	-	-
ncbi_113810970	4	3.98E-15	3.45E-14	PTGS2	cyclooxygenase [Penaeus monodon]	Metabolism;Human Diseases;Human Diseases;Organismal Systems;Human Diseases;Organismal Systems;Human Diseases;Organismal Systems;Human Diseases;Human Diseases;Human Diseases;Environmental Information Processing;Metabolism;Environmental Information Processing;Organismal Systems;Organismal Systems;Organismal Systems;Human Diseases;Environmental Information Processing;Organismal Systems	Global and overview maps;Cancers;Infectious diseases;Endocrine system;Cancers;Nervous system;Infectious diseases;Nervous system;Cancers;Cancers;Infectious diseases;Signal transduction;Lipid metabolism;Signal transduction;Immune system;Endocrine system;Endocrine system;Infectious diseases;Signal transduction;Immune system	ko01100//Metabolic pathways;ko05200//Pathways in cancer;ko05165//Human papillomavirus infection;ko04921//Oxytocin signaling pathway;ko05206//MicroRNAs in cancer;ko04723//Retrograde endocannabinoid signaling;ko05163//Human cytomegalovirus infection;ko04726//Serotonergic synapse;ko05222//Small cell lung cancer;ko05204//Chemical carcinogenesis;ko05167//Kaposi sarcoma-associated herpesvirus infection…	K11987;K11987;K11987;K11987;K11987;K11987;K11987;K11987;K11987;K11987;K11987;K11987;K11987;K11987;K11987;K11987;K11987;K11987;K11987;K11987	-	-	-
ncbi_113810980	2	0	0	--	mitochondrial ATPase inhibitor factor 1 precursor [Litopenaeus vannamei]	-	-	-	-	-	-	-
ncbi_113810981	2	0	0	RpL34	60S ribosomal protein L34 [Daphnia magna]	Genetic Information Processing	Translation	ko03010//Ribosome	K02915	-	-	-
ncbi_113810983	2	1.64E-26	1.90E-25	--	-	-	-	-	-	-	-	-
ncbi_113811036	4	9.98E-29	1.21E-27	Tango1	PREDICTED: transport and Golgi organization protein 1-like isoform X5 [Hyalella azteca]	-	-	-	-	-	-	-
ncbi_113811048	2	3.92E-94	1.00E-92	--	PREDICTED: NADH dehydrogenase [ubiquinone] flavoprotein 3, mitochondrial [Halyomorpha halys]	-	-	-	-	-	-	-
ncbi_113811052	2	0	0	ATP5F1D	mitochondrial ATP synthase delta subunit precursor [Litopenaeus vannamei]	Metabolism;Organismal Systems;Human Diseases;Human Diseases;Human Diseases;Metabolism	Global and overview maps;Environmental adaptation;Neurodegenerative diseases;Neurodegenerative diseases;Neurodegenerative diseases;Energy metabolism	ko01100//Metabolic pathways;ko04714//Thermogenesis;ko05016//Huntington disease;ko05010//Alzheimer disease;ko05012//Parkinson disease;ko00190//Oxidative phosphorylation	K02134;K02134;K02134;K02134;K02134;K02134	GO:0033178//proton-transporting two-sector ATPase complex, catalytic domain	GO:0015078//hydrogen ion transmembrane transporter activity;GO:0019829//cation-transporting ATPase activity	-
ncbi_113811065	3	3.23E-90	8.01E-89	--	-	-	-	-	-	-	-	-
ncbi_113811130	1	1.07E-103	2.92E-102	--	-	-	-	-	-	-	-	-
ncbi_113811157	4	1.24E-26	1.45E-25	smc4	PREDICTED: structural maintenance of chromosomes protein 4-like [Hyalella azteca]	-	-	-	-	-	-	-
ncbi_113811158	4	4.35E-57	7.96E-56	--	-	-	-	-	-	-	-	-
ncbi_113811160	2	1.43E-26	1.66E-25	--	PREDICTED: uncharacterized protein LOC108680484 isoform X1 [Hyalella azteca]	-	-	-	-	-	-	-
ncbi_113811180	1	7.65E-36	1.04E-34	Rbbp5	Retinoblastoma-binding protein 5 [Zootermopsis nevadensis]	Human Diseases	Endocrine and metabolic diseases	ko04934//Cushing syndrome	K14961	-	-	-
ncbi_113811194	3	0	0	--	-	-	-	-	-	-	-	-
ncbi_113811198	4	1.55E-44	2.39E-43	Adar	double-stranded RNA-specific adenosine deaminase [Marsupenaeus japonicus]	-	-	-	-	-	-	-
ncbi_113811210	4	2.16E-17	2.00E-16	Zc4h2	PREDICTED: zinc finger C4H2 domain-containing protein-like [Hyalella azteca]	-	-	-	-	-	-	-
ncbi_113811207	4	1.38E-64	2.75E-63	HRP65	PREDICTED: protein no-on-transient A-like [Hyalella azteca]	-	-	-	-	-	-	-
ncbi_113811209	3	2.06E-16	1.85E-15	--	-	-	-	-	-	-	-	-
ncbi_113811220	3	6.82E-127	2.14E-125	RAC1	Ras-related C3 botulinum toxin substrate 1 [Fenneropenaeus chinensis]	Human Diseases;Cellular Processes;Human Diseases;Cellular Processes;Environmental Information Processing;Cellular Processes;Cellular Processes;Environmental Information Processing;Human Diseases;Environmental Information Processing;Cellular Processes;Human Diseases;Human Diseases;Human Diseases;Human Diseases;Environmental Information Processing;Organismal Systems;Environmental Information Proces…	Cancers;Cellular community - eukaryotes;Cancers;Transport and catabolism;Signal transduction;Cell motility;Cellular community - eukaryotes;Signal transduction;Cancers;Signal transduction;Cellular community - eukaryotes;Cardiovascular diseases;Infectious diseases;Infectious diseases;Infectious diseases;Signal transduction;Digestive system;Signal transduction;Cancers;Cardiovascular diseases;Signal …	ko05200//Pathways in cancer;ko04510//Focal adhesion;ko05205//Proteoglycans in cancer;ko04145//Phagosome;ko04151//PI3K-Akt signaling pathway;ko04810//Regulation of actin cytoskeleton;ko04530//Tight junction;ko04015//Rap1 signaling pathway;ko05231//Choline metabolism in cancer;ko04013//MAPK signaling pathway - fly;ko04520//Adherens junction;ko05418//Fluid shear stress and atherosclerosis;ko05131//S…	K04392;K04392;K04392;K04392;K04392;K04392;K04392;K04392;K04392;K04392;K04392;K04392;K04392;K04392;K04392;K04392;K04392;K04392;K04392;K04392;K04392;K04392;K04392;K04392;K04392;K04392;K04392;K04392;K04392;K04392;K04392;K04392;K04392;K04392;K04392;K04392;K04392;K04392;K04392;K04392;K04392;K04392;K04392	-	-	-
ncbi_113811228	2	0	0	--	Similar to CG4692 [Heliconius melpomene]	Metabolism;Organismal Systems;Metabolism	Global and overview maps;Environmental adaptation;Energy metabolism	ko01100//Metabolic pathways;ko04714//Thermogenesis;ko00190//Oxidative phosphorylation	K02130;K02130;K02130	-	-	-
ncbi_113811235	2	1.63E-30	2.05E-29	ubl4a	PREDICTED: ubiquitin-like protein 4A [Hyalella azteca]	-	-	-	-	-	-	-
ncbi_113811237	1	0	0	Arg2	PREDICTED: arginase-1 isoform X2 [Nanorana parkeri]	Metabolism;Metabolism;Human Diseases;Metabolism;Metabolism	Global and overview maps;Global and overview maps;Infectious diseases;Amino acid metabolism;Amino acid metabolism	ko01100//Metabolic pathways;ko01230//Biosynthesis of amino acids;ko05146//Amoebiasis;ko00330//Arginine and proline metabolism;ko00220//Arginine biosynthesis	K01476;K01476;K01476;K01476;K01476	-	GO:0016787//hydrolase activity	-
ncbi_113811239	2	1.46E-09	1.03E-08	--	-	-	-	-	-	-	-	-
ncbi_113811238	5	6.97E-20	6.92E-19	PEX19	Peroxisomal biogenesis factor 19 [Zootermopsis nevadensis]	Cellular Processes	Transport and catabolism	ko04146//Peroxisome	K13337	GO:0044424//intracellular part	-	GO:0007031//peroxisome organization;GO:0045184//establishment of protein localization;GO:1902578//single-organism localization
ncbi_113811243	1	0	0	--	-	-	-	-	-	-	-	-
ncbi_113811244	2	1.18E-52	2.04E-51	ECHS1	PREDICTED: enoyl-CoA hydratase, mitochondrial-like [Hyalella azteca]	Metabolism;Metabolism;Metabolism;Metabolism;Metabolism;Metabolism;Metabolism;Metabolism;Metabolism;Metabolism;Metabolism	Global and overview maps;Global and overview maps;Amino acid metabolism;Amino acid metabolism;Lipid metabolism;Global and overview maps;Amino acid metabolism;Metabolism of other amino acids;Carbohydrate metabolism;Carbohydrate metabolism;Lipid metabolism	ko01100//Metabolic pathways;ko01200//Carbon metabolism;ko00310//Lysine degradation;ko00280//Valine, leucine and isoleucine degradation;ko00071//Fatty acid degradation;ko01212//Fatty acid metabolism;ko00380//Tryptophan metabolism;ko00410//beta-Alanine metabolism;ko00640//Propanoate metabolism;ko00650//Butanoate metabolism;ko00062//Fatty acid elongation	K07511;K07511;K07511;K07511;K07511;K07511;K07511;K07511;K07511;K07511;K07511	-	-	-
ncbi_113811245	2	8.57E-11	6.33E-10	--	PREDICTED: regulator of G-protein signaling 3-like [Cricetulus griseus]	-	-	-	-	-	-	-
ncbi_113811246	4	6.82E-14	5.68E-13	br	PREDICTED: protein bric-a-brac 2-like [Neodiprion lecontei]	Cellular Processes;Organismal Systems	Cell growth and death;Development	ko04214//Apoptosis - fly;ko04320//Dorso-ventral axis formation	K02174;K02174	-	-	-
ncbi_113811251	2	0	0	rps11	ribosomal protein S11 [Rimicaris exoculata]	Genetic Information Processing	Translation	ko03010//Ribosome	K02949	GO:0030529//intracellular ribonucleoprotein complex	-	GO:0010467//gene expression
ncbi_113811253	2	3.39E-23	3.64E-22	PEBP1	PREDICTED: protein D3 [Drosophila busckii]	-	-	-	-	-	-	-
ncbi_113811256	2	5.09E-276	2.74E-274	--	PREDICTED: protein CDV3 homolog [Orussus abietinus]	-	-	-	-	-	-	-
ncbi_113811259	2	8.83E-23	9.43E-22	--	Ribonuclease P/MRP protein subunit POP5 [Camponotus floridanus]	Genetic Information Processing;Genetic Information Processing	Translation;Translation	ko03013//RNA transport;ko03008//Ribosome biogenesis in eukaryotes	K03537;K03537	-	-	-
ncbi_113811267	3	5.92E-37	8.20E-36	GRINA	PREDICTED: protein lifeguard 1-like isoform X2 [Hyalella azteca]	-	-	-	-	-	-	-
ncbi_113811290	4	2.22E-30	2.78E-29	Trappc1	PREDICTED: trafficking protein particle complex subunit 1-like [Hyalella azteca]	-	-	-	-	-	-	GO:0016482//cytoplasmic transport
ncbi_113811291	4	1.53E-25	1.75E-24	FEN1	PREDICTED: flap endonuclease 1-like [Hyalella azteca]	Genetic Information Processing;Genetic Information Processing;Genetic Information Processing	Replication and repair;Replication and repair;Replication and repair	ko03410//Base excision repair;ko03030//DNA replication;ko03450//Non-homologous end-joining	K04799;K04799;K04799	GO:0031981//nuclear lumen;GO:0043232//intracellular non-membrane-bounded organelle	GO:0003676//nucleic acid binding;GO:0004527//exonuclease activity;GO:0016888//endodeoxyribonuclease activity, producing 5'-phosphomonoesters;GO:0043169//cation binding	GO:0006281//DNA repair;GO:0006308//DNA catabolic process
ncbi_113811301	4	9.39E-09	6.35E-08	DENND1A	DENN domain-containing protein 1A [Zootermopsis nevadensis]	-	-	-	-	-	-	-
ncbi_113811304	2	0	0	PSMA5	PREDICTED: proteasome subunit alpha type-5-like [Hyalella azteca]	Genetic Information Processing	Folding, sorting and degradation	ko03050//Proteasome	K02729	-	-	-
ncbi_113811314	2	3.93E-168	1.53E-166	Snrpa1	PREDICTED: U2 small nuclear ribonucleoprotein A', partial [Halyomorpha halys]	Genetic Information Processing	Transcription	ko03040//Spliceosome	K11092	-	-	-
ncbi_113811333	5	3.40E-19	3.32E-18	N4bp2l2	PREDICTED: NEDD4-binding protein 2-like [Lingula anatina]	-	-	-	-	-	-	-
ncbi_113811338	4	1.56E-11	1.19E-10	THOC2	PREDICTED: THO complex subunit 2-like [Hyalella azteca]	Genetic Information Processing;Genetic Information Processing	Translation;Transcription	ko03013//RNA transport;ko03040//Spliceosome	K12879;K12879	-	-	-
ncbi_113811357	3	1.55E-181	6.31E-180	ovca2	PREDICTED: ovarian cancer-associated gene 2 protein homolog [Lingula anatina]	-	-	-	-	-	-	-
ncbi_113811362	5	7.07E-23	7.56E-22	Tspan33	PREDICTED: tetraspanin-33-like [Hyalella azteca]	-	-	-	-	-	-	-
ncbi_113811363	2	1.37E-199	5.94E-198	Eif3b	PREDICTED: eukaryotic translation initiation factor 3 subunit B-like [Hyalella azteca]	Genetic Information Processing	Translation	ko03013//RNA transport	K03253	-	-	-
ncbi_113811387	2	1.02E-175	4.10E-174	Pes1	PREDICTED: pescadillo-like [Limulus polyphemus]	-	-	-	-	-	-	-
ncbi_113811390	3	6.37E-11	4.73E-10	--	-	-	-	-	-	-	-	-
ncbi_113811391	4	9.16E-26	1.05E-24	HAT1	Histone acetyltransferase type B catalytic subunit [Zootermopsis nevadensis]	Human Diseases	Substance dependence	ko05034//Alcoholism	K11303	-	-	GO:0009987//cellular process
ncbi_113811416	1	1.08E-31	1.39E-30	mthl1	PREDICTED: G-protein coupled receptor Mth2-like isoform X2 [Hyalella azteca]	-	-	-	-	-	-	-
ncbi_113811453	1	2.73E-121	8.32E-120	Myo61F	PREDICTED: myosin-IB-like [Hyalella azteca]	-	-	-	-	-	-	-
ncbi_113811439	2	1.87E-10	1.36E-09	Urah	PREDICTED: 5-hydroxyisourate hydrolase-like isoform X1 [Lingula anatina]	Metabolism;Metabolism	Global and overview maps;Nucleotide metabolism	ko01100//Metabolic pathways;ko00230//Purine metabolism	K07127;K07127	-	-	-
ncbi_113811461	2	6.86E-50	1.15E-48	MRPS9	PREDICTED: 28S ribosomal protein S9, mitochondrial [Anoplophora glabripennis]	Genetic Information Processing	Translation	ko03010//Ribosome	K02996	-	-	-
ncbi_113811460	4	3.37E-11	2.53E-10	PPWD1	PREDICTED: LOW QUALITY PROTEIN: peptidylprolyl isomerase domain and WD repeat-containing protein 1 [Aethina tumida]	-	-	-	-	-	-	-
ncbi_113811480	3	3.78E-19	3.67E-18	--	-	-	-	-	-	-	-	-
ncbi_113811483	2	2.11E-12	1.67E-11	POP1	Ribonucleases P/MRP protein subunit POP1 [Zootermopsis nevadensis]	Genetic Information Processing;Genetic Information Processing	Translation;Translation	ko03013//RNA transport;ko03008//Ribosome biogenesis in eukaryotes	K01164;K01164	-	-	-
ncbi_113811510	3	8.10E-122	2.47E-120	Angptl7	PREDICTED: angiopoietin-related protein 7 isoform X2 [Pelodiscus sinensis]	-	-	-	-	-	-	-
ncbi_113811521	2	3.85E-70	8.10E-69	prkrip1	PREDICTED: PRKR-interacting protein 1 homolog [Hyalella azteca]	-	-	-	-	-	-	-
ncbi_113811523	4	5.75E-96	1.49E-94	B52	hnRNP protein, partial [Cherax quadricarinatus]	Genetic Information Processing;Human Diseases	Transcription;Infectious diseases	ko03040//Spliceosome;ko05168//Herpes simplex infection	K12893;K12893	-	GO:0003676//nucleic acid binding	GO:0048024//regulation of mRNA splicing, via spliceosome
ncbi_113811537	2	0	0	MDH2	malate dehydrogenase [Macrobrachium nipponense]	Metabolism;Metabolism;Metabolism;Metabolism;Metabolism;Metabolism	Global and overview maps;Global and overview maps;Carbohydrate metabolism;Amino acid metabolism;Carbohydrate metabolism;Carbohydrate metabolism	ko01100//Metabolic pathways;ko01200//Carbon metabolism;ko00020//Citrate cycle (TCA cycle);ko00270//Cysteine and methionine metabolism;ko00620//Pyruvate metabolism;ko00630//Glyoxylate and dicarboxylate metabolism	K00026;K00026;K00026;K00026;K00026;K00026	-	GO:0016615//malate dehydrogenase activity	GO:0005975//carbohydrate metabolic process;GO:0006101//citrate metabolic process;GO:0043648//dicarboxylic acid metabolic process
ncbi_113811539	2	6.32E-14	5.28E-13	--	-	-	-	-	-	-	-	-
ncbi_113811531	3	3.70E-181	1.50E-179	CSTB	PREDICTED: cystatin-B [Nipponia nippon]	-	-	-	-	-	-	-
ncbi_113811550	3	4.21E-56	7.62E-55	--	PREDICTED: uncharacterized protein LOC108677823 isoform X2 [Hyalella azteca]	-	-	-	-	-	-	-
ncbi_113811583	3	2.36E-56	4.29E-55	--	-	-	-	-	-	-	-	-
ncbi_113811595	2	5.72E-26	6.59E-25	DAP3	PREDICTED: 28S ribosomal protein S29, mitochondrial-like [Limulus polyphemus]	-	-	-	-	-	-	-
ncbi_113811598	1	3.12E-75	6.87E-74	ME1	PREDICTED: NADP-dependent malic enzyme-like isoform X1 [Hyalella azteca]	Metabolism;Metabolism;Organismal Systems;Metabolism	Global and overview maps;Global and overview maps;Endocrine system;Carbohydrate metabolism	ko01100//Metabolic pathways;ko01200//Carbon metabolism;ko03320//PPAR signaling pathway;ko00620//Pyruvate metabolism	K00029;K00029;K00029;K00029	-	-	-
ncbi_113811600	2	8.27E-24	9.07E-23	mRpS24	28S ribosomal protein S24, mitochondrial [Daphnia magna]	-	-	-	-	-	-	-
ncbi_113811602	2	4.41E-59	8.28E-58	eif3l	PREDICTED: eukaryotic translation initiation factor 3 subunit L-like [Hyalella azteca]	-	-	-	-	GO:0070993//translation preinitiation complex	-	GO:0006412//translation
ncbi_113811605	2	2.09E-172	8.23E-171	--	-	-	-	-	-	-	-	-
ncbi_113811622	2	2.21E-117	6.62E-116	--	-	-	-	-	-	-	-	-
ncbi_113811630	2	8.41E-19	8.13E-18	AAEL006251	PREDICTED: ubiquitin-fold modifier 1 [Lingula anatina]	-	-	-	-	-	-	-
ncbi_113811631	2	6.40E-22	6.71E-21	ttm50	PREDICTED: mitochondrial import inner membrane translocase subunit TIM50-C-like [Hyalella azteca]	-	-	-	-	GO:0019866//organelle inner membrane	-	GO:0008152//metabolic process
ncbi_113811664	4	6.66E-24	7.32E-23	--	PREDICTED: apoptosis regulatory protein Siva [Camponotus floridanus]	-	-	-	-	-	-	-
ncbi_113811665	2	3.10E-41	4.56E-40	TSR2	PREDICTED: pre-rRNA-processing protein TSR2 homolog isoform X2 [Lingula anatina]	-	-	-	-	-	-	-
ncbi_113811670	2	2.48E-175	9.88E-174	MAPRE3	Eb1 [Daphnia magna]	-	-	-	-	-	-	-
ncbi_113811689	5	0	0	GABARAP	autophagy-related protein 8 [Litopenaeus vannamei]	Cellular Processes;Environmental Information Processing;Organismal Systems;Organismal Systems;Environmental Information Processing;Organismal Systems;Human Diseases;Cellular Processes;Cellular Processes	Transport and catabolism;Signal transduction;Aging;Immune system;Signal transduction;Nervous system;Infectious diseases;Transport and catabolism;Transport and catabolism	ko04140//Autophagy - animal;ko04068//FoxO signaling pathway;ko04212//Longevity regulating pathway - worm;ko04621//NOD-like receptor signaling pathway;ko04371//Apelin signaling pathway;ko04727//GABAergic synapse;ko05167//Kaposi sarcoma-associated herpesvirus infection;ko04137//Mitophagy - animal;ko04136//Autophagy - other eukaryotes	K08341;K08341;K08341;K08341;K08341;K08341;K08341;K08341;K08341	GO:0005767//secondary lysosome;GO:0005775//vacuolar lumen;GO:0005776//autophagosome	GO:0019900//kinase binding	GO:0006914//autophagy;GO:0010259//multicellular organism aging;GO:0010623//developmental programmed cell death;GO:0031329//regulation of cellular catabolic process;GO:1903320//regulation of protein modification by small protein conjugation or removal
ncbi_113811712	4	3.73E-13	3.02E-12	PCNA	proliferating cell nuclear antigen [Litopenaeus vannamei]	Cellular Processes;Human Diseases;Cellular Processes;Human Diseases;Genetic Information Processing;Genetic Information Processing;Genetic Information Processing;Genetic Information Processing	Cellular community - eukaryotes;Infectious diseases;Cell growth and death;Infectious diseases;Replication and repair;Replication and repair;Replication and repair;Replication and repair	ko04530//Tight junction;ko05166//HTLV-I infection;ko04110//Cell cycle;ko05161//Hepatitis B;ko03420//Nucleotide excision repair;ko03410//Base excision repair;ko03030//DNA replication;ko03430//Mismatch repair	K04802;K04802;K04802;K04802;K04802;K04802;K04802;K04802	-	-	-
ncbi_113811735	1	3.16E-11	2.37E-10	alr	alanine racemase [Marsupenaeus japonicus]	-	-	-	-	-	GO:0047661//amino-acid racemase activity	GO:0006520//cellular amino acid metabolic process
ncbi_113811741	3	6.77E-102	1.83E-100	--	-	-	-	-	-	-	-	-
ncbi_113811748	2	1.61E-16	1.46E-15	ift46	PREDICTED: intraflagellar transport protein 46 homolog isoform X2 [Hyalella azteca]	-	-	-	-	-	-	-
ncbi_113811749	3	4.58E-139	1.57E-137	ced-10	PREDICTED: ras-like GTP-binding protein RhoL [Cerapachys biroi]	Human Diseases;Cellular Processes;Human Diseases;Cellular Processes;Environmental Information Processing;Cellular Processes;Cellular Processes;Environmental Information Processing;Human Diseases;Environmental Information Processing;Cellular Processes;Human Diseases;Human Diseases;Human Diseases;Human Diseases;Environmental Information Processing;Organismal Systems;Environmental Information Proces…	Cancers;Cellular community - eukaryotes;Cancers;Transport and catabolism;Signal transduction;Cell motility;Cellular community - eukaryotes;Signal transduction;Cancers;Signal transduction;Cellular community - eukaryotes;Cardiovascular diseases;Infectious diseases;Infectious diseases;Infectious diseases;Signal transduction;Digestive system;Signal transduction;Cancers;Cardiovascular diseases;Signal …	ko05200//Pathways in cancer;ko04510//Focal adhesion;ko05205//Proteoglycans in cancer;ko04145//Phagosome;ko04151//PI3K-Akt signaling pathway;ko04810//Regulation of actin cytoskeleton;ko04530//Tight junction;ko04015//Rap1 signaling pathway;ko05231//Choline metabolism in cancer;ko04013//MAPK signaling pathway - fly;ko04520//Adherens junction;ko05418//Fluid shear stress and atherosclerosis;ko05131//S…	K04392;K04392;K04392;K04392;K04392;K04392;K04392;K04392;K04392;K04392;K04392;K04392;K04392;K04392;K04392;K04392;K04392;K04392;K04392;K04392;K04392;K04392;K04392;K04392;K04392;K04392;K04392;K04392;K04392;K04392;K04392;K04392;K04392;K04392;K04392;K04392;K04392;K04392;K04392;K04392;K04392;K04392;K04392	-	-	-
ncbi_113811764	4	6.36E-28	7.62E-27	nme6	PREDICTED: nucleoside diphosphate kinase 6 [Poecilia mexicana]	Metabolism;Metabolism;Metabolism;Metabolism	Global and overview maps;Nucleotide metabolism;Xenobiotics biodegradation and metabolism;Nucleotide metabolism	ko01100//Metabolic pathways;ko00230//Purine metabolism;ko00983//Drug metabolism - other enzymes;ko00240//Pyrimidine metabolism	K00940;K00940;K00940;K00940	-	-	-
ncbi_113811773	3	1.17E-11	8.97E-11	--	-	-	-	-	-	-	-	-
ncbi_113811780	2	2.48E-18	2.37E-17	Fis1	PREDICTED: mitochondrial fission 1 protein-like [Hyalella azteca]	Cellular Processes	Transport and catabolism	ko04137//Mitophagy - animal	K17969	-	-	-
ncbi_113811786	2	2.03E-25	2.31E-24	TRMT61A	PREDICTED: tRNA (adenine(58)-N(1))-methyltransferase catalytic subunit TRMT61A-like [Hyalella azteca]	-	-	-	-	-	-	-
ncbi_113811789	4	1.69E-09	1.18E-08	ift20	PREDICTED: intraflagellar transport protein 20 homolog [Hyalella azteca]	-	-	-	-	GO:0005815//microtubule organizing center;GO:0030990//intraciliary transport particle;GO:0031513//nonmotile primary cilium;GO:0031988//membrane-bounded vesicle;GO:0043231//intracellular membrane-bounded organelle;GO:0044441//ciliary part	GO:0005515//protein binding	GO:0000045//autophagosome assembly;GO:0007632//visual behavior;GO:0008283//cell proliferation;GO:0010927//cellular component assembly involved in morphogenesis;GO:0015031//protein transport;GO:0022604//regulation of cell morphogenesis;GO:0030111//regulation of Wnt signaling pathway;GO:0033365//protein localization to organelle;GO:0035051//cardiocyte differentiation;GO:0051640//organelle localizat…
ncbi_113811794	2	7.10E-39	1.01E-37	rps21	ribosomal protein rps21 [Palaemon varians]	Genetic Information Processing	Translation	ko03010//Ribosome	K02971	GO:0015935//small ribosomal subunit	GO:0003723//RNA binding;GO:0005515//protein binding	GO:0010467//gene expression
ncbi_113811809	4	1.27E-14	1.08E-13	CCDC94	PREDICTED: coiled-coil domain-containing protein 94-like [Hyalella azteca]	-	-	-	-	-	-	-
ncbi_113811831	2	2.37E-47	3.80E-46	F46B6.12	PREDICTED: UPF0587 protein C1orf123 homolog [Hyalella azteca]	-	-	-	-	-	-	-
ncbi_113811824	2	1.49E-09	1.05E-08	--	-	-	-	-	-	-	-	-
ncbi_113811859	2	0	0	UBE2L3	ubiquitin-conjugating enzyme [Litopenaeus vannamei]	Genetic Information Processing;Human Diseases	Folding, sorting and degradation;Neurodegenerative diseases	ko04120//Ubiquitin mediated proteolysis;ko05012//Parkinson disease	K04552;K04552	-	GO:0003824//catalytic activity	-
ncbi_113811876	4	8.92E-24	9.78E-23	AGAP002062	PREDICTED: protein FAM50 homolog [Bactrocera oleae]	-	-	-	-	-	-	-
ncbi_113811885	3	0	0	IDH1	PREDICTED: isocitrate dehydrogenase [NADP] cytoplasmic-like [Lingula anatina]	Metabolism;Metabolism;Metabolism;Cellular Processes;Metabolism;Human Diseases;Metabolism;Metabolism	Global and overview maps;Global and overview maps;Metabolism of other amino acids;Transport and catabolism;Global and overview maps;Cancers;Carbohydrate metabolism;Global and overview maps	ko01100//Metabolic pathways;ko01200//Carbon metabolism;ko00480//Glutathione metabolism;ko04146//Peroxisome;ko01230//Biosynthesis of amino acids;ko05230//Central carbon metabolism in cancer;ko00020//Citrate cycle (TCA cycle);ko01210//2-Oxocarboxylic acid metabolism	K00031;K00031;K00031;K00031;K00031;K00031;K00031;K00031	-	-	-
ncbi_113811887	2	9.67E-22	1.01E-20	TIMM44	Mitochondrial import inner membrane translocase subunit TIM44 [Zootermopsis nevadensis]	-	-	-	-	-	-	-
ncbi_113811888	2	1.10E-52	1.89E-51	WDR61	PREDICTED: WD repeat-containing protein 61-like [Hyalella azteca]	Genetic Information Processing	Folding, sorting and degradation	ko03018//RNA degradation	K12602	-	GO:0016740//transferase activity	-
ncbi_113811895	4	1.95E-25	2.22E-24	MED10	PREDICTED: mediator of RNA polymerase II transcription subunit 10-like [Hyalella azteca]	-	-	-	-	GO:0043234//protein complex	-	GO:0006355//regulation of transcription, DNA-templated
ncbi_113811900	3	5.51E-17	5.04E-16	cwo	Hairy/enhancer-of-split related with YRPW motif protein 2 [Zootermopsis nevadensis]	Human Diseases;Human Diseases;Human Diseases	Cancers;Infectious diseases;Cancers	ko05200//Pathways in cancer;ko05165//Human papillomavirus infection;ko05224//Breast cancer	K09091;K09091;K09091	-	-	GO:0010467//gene expression;GO:0034645//cellular macromolecule biosynthetic process
ncbi_113811918	3	0	0	--	PREDICTED: galactose-specific lectin nattectin-like [Hyalella azteca]	-	-	-	-	-	-	-
ncbi_113811941	4	2.06E-49	3.43E-48	--	PREDICTED: mediator of DNA damage checkpoint protein 1-like [Hyalella azteca]	-	-	-	-	-	-	-
ncbi_113811942	2	1.22E-08	8.18E-08	--	protein C1orf53 [Lepeophtheirus salmonis]	-	-	-	-	-	-	-
ncbi_113811955	3	8.52E-23	9.10E-22	Orct	PREDICTED: organic cation transporter protein-like [Hyalella azteca]	Human Diseases	Cancers	ko05231//Choline metabolism in cancer	K08202	-	-	-
ncbi_113811958	2	1.64E-09	1.15E-08	DPH5	PREDICTED: diphthine synthase [Takifugu rubripes]	-	-	-	-	-	GO:0016741//transferase activity, transferring one-carbon groups	-
ncbi_113811964	2	6.40E-11	4.76E-10	exo1	PREDICTED: exonuclease 1-like [Limulus polyphemus]	Genetic Information Processing	Replication and repair	ko03430//Mismatch repair	K10746	-	-	-
ncbi_113811980	5	6.32E-10	4.51E-09	Nubpl	PREDICTED: iron-sulfur protein NUBPL-like [Branchiostoma belcheri]	-	-	-	-	-	-	-
ncbi_113811985	5	1.76E-11	1.34E-10	echdc3	Enoyl-CoA hydratase domain-containing protein 3, mitochondrial [Zootermopsis nevadensis]	-	-	-	-	-	-	-
ncbi_113811989	3	3.73E-19	3.63E-18	C15orf40	PREDICTED: UPF0235 protein C15orf40 homolog [Apis mellifera]	-	-	-	-	-	-	-
ncbi_113812019	4	5.68E-24	6.25E-23	ATG12	autophagy related protein Atg12-like protein [Danaus plexippus]	Cellular Processes;Environmental Information Processing;Organismal Systems;Cellular Processes;Organismal Systems	Transport and catabolism;Signal transduction;Immune system;Transport and catabolism;Immune system	ko04140//Autophagy - animal;ko04068//FoxO signaling pathway;ko04621//NOD-like receptor signaling pathway;ko04136//Autophagy - other eukaryotes;ko04622//RIG-I-like receptor signaling pathway	K08336;K08336;K08336;K08336;K08336	GO:0044424//intracellular part	-	GO:0044248//cellular catabolic process
ncbi_113812024	2	1.75E-237	8.50E-236	NDUFS6	PREDICTED: NADH dehydrogenase [ubiquinone] iron-sulfur protein 6, mitochondrial [Copidosoma floridanum]	Metabolism;Organismal Systems;Human Diseases;Human Diseases;Human Diseases;Human Diseases;Metabolism;Organismal Systems	Global and overview maps;Environmental adaptation;Neurodegenerative diseases;Neurodegenerative diseases;Endocrine and metabolic diseases;Neurodegenerative diseases;Energy metabolism;Nervous system	ko01100//Metabolic pathways;ko04714//Thermogenesis;ko05016//Huntington disease;ko05010//Alzheimer disease;ko04932//Non-alcoholic fatty liver disease (NAFLD);ko05012//Parkinson disease;ko00190//Oxidative phosphorylation;ko04723//Retrograde endocannabinoid signaling	K03939;K03939;K03939;K03939;K03939;K03939;K03939;K03939	-	-	-
ncbi_113812023	2	9.01E-14	7.47E-13	Bmcp	PREDICTED: kidney mitochondrial carrier protein 1-like [Hyalella azteca]	-	-	-	-	-	-	-
ncbi_113812036	2	2.93E-52	5.02E-51	Rnmt	PREDICTED: mRNA cap guanine-N7 methyltransferase-like [Hyalella azteca]	Genetic Information Processing	Translation	ko03015//mRNA surveillance pathway	K00565	-	-	-
ncbi_113812042	2	3.91E-10	2.81E-09	osgep	PREDICTED: probable tRNA N6-adenosine threonylcarbamoyltransferase [Hyalella azteca]	-	-	-	-	GO:0044424//intracellular part	GO:0016746//transferase activity, transferring acyl groups;GO:0043169//cation binding	GO:0006400//tRNA modification
ncbi_113812043	4	8.68E-228	4.09E-226	SKP1	S-phase kinase-associated protein 1 [Eriocheir sinensis]	Human Diseases;Genetic Information Processing;Genetic Information Processing;Cellular Processes;Environmental Information Processing;Human Diseases;Cellular Processes;Environmental Information Processing;Environmental Information Processing;Organismal Systems	Cancers;Folding, sorting and degradation;Folding, sorting and degradation;Cell growth and death;Signal transduction;Infectious diseases;Cell growth and death;Signal transduction;Signal transduction;Environmental adaptation	ko05200//Pathways in cancer;ko04141//Protein processing in endoplasmic reticulum;ko04120//Ubiquitin mediated proteolysis;ko04110//Cell cycle;ko04310//Wnt signaling pathway;ko05168//Herpes simplex infection;ko04114//Oocyte meiosis;ko04350//TGF-beta signaling pathway;ko04341//Hedgehog signaling pathway - fly;ko04710//Circadian rhythm	K03094;K03094;K03094;K03094;K03094;K03094;K03094;K03094;K03094;K03094	-	GO:0016772//transferase activity, transferring phosphorus-containing groups	GO:0006796//phosphate-containing compound metabolic process
ncbi_113812048	2	1.93E-39	2.77E-38	CWC15	PREDICTED: spliceosome-associated protein CWC15 homolog [Hyalella azteca]	Genetic Information Processing	Transcription	ko03040//Spliceosome	K12863	-	-	-
ncbi_113812049	3	0	0	--	PREDICTED: F-box only protein 6-like [Crassostrea gigas]	Genetic Information Processing	Folding, sorting and degradation	ko04141//Protein processing in endoplasmic reticulum	K10100	-	-	-
ncbi_113812052	4	4.25E-09	2.93E-08	Kdm2	JmjC domain-containing histone demethylation protein 1 [Zootermopsis nevadensis]	-	-	-	-	-	-	-
ncbi_113812059	3	1.98E-260	1.04E-258	--	-	-	-	-	-	-	-	-
ncbi_113812061	4	0	0	TSPAN3	TSPAN8 [Litopenaeus vannamei]	Human Diseases;Cellular Processes	Cancers;Transport and catabolism	ko05205//Proteoglycans in cancer;ko04142//Lysosome	K06497;K06497	-	-	-
ncbi_113812066	2	0	0	--	-	-	-	-	-	-	-	-
ncbi_113812067	2	5.90E-37	8.17E-36	--	-	-	-	-	-	-	-	-
ncbi_113812069	2	0	0	--	-	-	-	-	-	-	-	-
ncbi_113812068	2	0	0	--	-	-	-	-	-	-	-	-
ncbi_113812130	2	0	0	4CL5	PREDICTED: 4-coumarate--CoA ligase 1 isoform X1 [Strongylocentrotus purpuratus]	Metabolism;Metabolism;Metabolism	Global and overview maps;Amino acid metabolism;Metabolism of cofactors and vitamins	ko01100//Metabolic pathways;ko00360//Phenylalanine metabolism;ko00130//Ubiquinone and other terpenoid-quinone biosynthesis	K01904;K01904;K01904	-	-	-
ncbi_113812172	3	0	0	--	-	-	-	-	-	-	-	-
ncbi_113812178	2	1.40E-283	7.77E-282	Tim10	PREDICTED: mitochondrial import inner membrane translocase subunit Tim10-like [Hyalella azteca]	-	-	-	-	-	GO:0043169//cation binding	GO:0006839//mitochondrial transport;GO:0008104//protein localization
ncbi_113812188	4	4.42E-11	3.30E-10	CG1646	PREDICTED: pre-mRNA-processing factor 39-like [Hyalella azteca]	-	-	-	-	-	-	-
ncbi_113812187	4	1.62E-98	4.24E-97	--	-	-	-	-	-	-	-	-
ncbi_113812189	2	0	0	psmb3	PREDICTED: proteasome subunit beta type-3-like, partial [Hyalella azteca]	Genetic Information Processing	Folding, sorting and degradation	ko03050//Proteasome	K02735	GO:0043234//protein complex	-	GO:0006508//proteolysis
ncbi_113812201	2	1.35E-11	1.03E-10	CPT2	PREDICTED: carnitine O-palmitoyltransferase 2, mitochondrial-like [Hyalella azteca]	Organismal Systems;Organismal Systems;Metabolism;Metabolism	Environmental adaptation;Endocrine system;Lipid metabolism;Global and overview maps	ko04714//Thermogenesis;ko03320//PPAR signaling pathway;ko00071//Fatty acid degradation;ko01212//Fatty acid metabolism	K08766;K08766;K08766;K08766	-	-	-
ncbi_113812216	2	4.59E-33	6.03E-32	CPIJ004698	elongation factor ts [Culex quinquefasciatus]	-	-	-	-	-	-	-
ncbi_113812219	3	4.53E-58	8.39E-57	--	C-type lectin 3, partial [Marsupenaeus japonicus]	-	-	-	-	-	-	-
ncbi_113812222	2	4.31E-51	7.33E-50	GPN1	PREDICTED: GPN-loop GTPase 1-like [Hyalella azteca]	-	-	-	-	-	-	-
ncbi_113812225	2	4.11E-27	4.84E-26	mRpL45	AAEL012025-PA [Aedes aegypti]	-	-	-	-	-	-	-
ncbi_113812232	2	3.35E-240	1.64E-238	mak16-b	PREDICTED: protein MAK16 homolog [Plutella xylostella]	-	-	-	-	-	-	-
ncbi_113812238	2	2.17E-153	8.01E-152	pfdn1	PREDICTED: prefoldin subunit 1-like [Hyalella azteca]	-	-	-	-	-	-	-
ncbi_113812258	4	5.99E-14	5.01E-13	--	-	-	-	-	-	-	-	-
ncbi_113812270	3	0	0	--	-	-	-	-	-	-	-	-
ncbi_113812303	2	1.56E-12	1.23E-11	MagR	PREDICTED: iron-sulfur cluster assembly 1 homolog, mitochondrial-like [Hyalella azteca]	-	-	-	-	-	GO:0051540//metal cluster binding	GO:0009058//biosynthetic process
ncbi_113812323	2	9.25E-146	3.30E-144	AAEL006169	cathepsin D [Penaeus monodon]	Cellular Processes;Cellular Processes;Cellular Processes;Environmental Information Processing;Human Diseases;Organismal Systems	Transport and catabolism;Cell growth and death;Transport and catabolism;Signal transduction;Infectious diseases;Endocrine system	ko04142//Lysosome;ko04210//Apoptosis;ko04140//Autophagy - animal;ko04071//Sphingolipid signaling pathway;ko05152//Tuberculosis;ko04915//Estrogen signaling pathway	K01379;K01379;K01379;K01379;K01379;K01379	-	GO:0016787//hydrolase activity	GO:0019538//protein metabolic process
ncbi_113812326	2	2.82E-11	2.12E-10	USP8	PREDICTED: ubiquitin carboxyl-terminal hydrolase 8-like [Hyalella azteca]	Cellular Processes;Human Diseases;Cellular Processes	Transport and catabolism;Endocrine and metabolic diseases;Transport and catabolism	ko04144//Endocytosis;ko04934//Cushing syndrome;ko04137//Mitophagy - animal	K11839;K11839;K11839	-	GO:0016787//hydrolase activity	-
ncbi_113812331	2	2.80E-17	2.59E-16	--	-	-	-	-	-	-	-	-
ncbi_113812357	2	3.69E-72	7.92E-71	GCSH	PREDICTED: glycine cleavage system H protein, mitochondrial-like, partial [Hyalella azteca]	Metabolism;Metabolism;Metabolism;Metabolism	Global and overview maps;Global and overview maps;Amino acid metabolism;Carbohydrate metabolism	ko01100//Metabolic pathways;ko01200//Carbon metabolism;ko00260//Glycine, serine and threonine metabolism;ko00630//Glyoxylate and dicarboxylate metabolism	K02437;K02437;K02437;K02437	-	-	GO:0006546//glycine catabolic process
ncbi_113812360	2	5.75E-11	4.28E-10	Cse1l	cellular apoptosis susceptibility protein [Fenneropenaeus chinensis]	-	-	-	-	-	-	-
ncbi_113812361	2	1.56E-10	1.14E-09	THUMPD1	PREDICTED: THUMP domain-containing protein 1 homolog [Orussus abietinus]	-	-	-	-	-	-	-
ncbi_113812398	2	8.90E-23	9.50E-22	Dhx15	PREDICTED: pre-mRNA-splicing factor ATP-dependent RNA helicase DHX15 isoform X2 [Diachasma alloeum]	Genetic Information Processing	Transcription	ko03040//Spliceosome	K12820	-	-	-
ncbi_113812399	4	7.83E-60	1.48E-58	PDCD4	PREDICTED: programmed cell death protein 4-like [Hyalella azteca]	-	-	-	-	-	-	-
ncbi_113812417	4	1.27E-08	8.53E-08	PLA2G7	PREDICTED: platelet-activating factor acetylhydrolase-like isoform X1 [Hyalella azteca]	Metabolism;Metabolism	Global and overview maps;Lipid metabolism	ko01100//Metabolic pathways;ko00565//Ether lipid metabolism	K01062;K01062	-	-	-
ncbi_113812420	4	2.48E-23	2.68E-22	Phum_PHUM462900	PREDICTED: inosine triphosphate pyrophosphatase-like [Hyalella azteca]	Metabolism;Metabolism;Metabolism	Global and overview maps;Nucleotide metabolism;Xenobiotics biodegradation and metabolism	ko01100//Metabolic pathways;ko00230//Purine metabolism;ko00983//Drug metabolism - other enzymes	K01519;K01519;K01519	GO:0044424//intracellular part	GO:0043169//cation binding;GO:0047429//nucleoside-triphosphate diphosphatase activity	GO:0006996//organelle organization;GO:0009143//nucleoside triphosphate catabolic process;GO:0009154//purine ribonucleotide catabolic process
ncbi_113812419	4	1.67E-10	1.22E-09	TfIIA-L	PREDICTED: transcription initiation factor IIA subunit 1-like [Hyalella azteca]	Human Diseases;Genetic Information Processing	Cancers;Transcription	ko05203//Viral carcinogenesis;ko03022//Basal transcription factors	K03122;K03122	-	-	-
ncbi_113812427	3	2.10E-18	2.01E-17	fabG	3-oxoacyl-[acyl-carrier-protein] reductase [Zootermopsis nevadensis]	-	-	-	-	-	-	-
ncbi_113812438	2	3.06E-137	1.04E-135	Timm17b	PREDICTED: mitochondrial import inner membrane translocase subunit Tim17-B-like [Hyalella azteca]	-	-	-	-	GO:0031224//intrinsic component of membrane	-	-
ncbi_113812439	2	3.77E-67	7.71E-66	Gnl2	PREDICTED: nucleolar GTP-binding protein 2 [Polistes dominula]	Genetic Information Processing	Translation	ko03008//Ribosome biogenesis in eukaryotes	K14537	-	-	-
ncbi_113812454	2	0	0	mRpS25	mitochondrial ribosomal protein S25 [Riptortus pedestris]	-	-	-	-	-	-	-
ncbi_113812463	3	0	0	--	-	-	-	-	-	-	-	-
ncbi_113812466	4	7.61E-09	5.17E-08	rdgBbeta	Cytoplasmic phosphatidylinositol transfer protein 1 [Lucilia cuprina]	-	-	-	-	-	-	GO:0051234//establishment of localization
ncbi_113812468	2	0	0	ARF1	PREDICTED: ADP-ribosylation factor 1 [Papilio polytes]	Cellular Processes;Human Diseases;Environmental Information Processing;Human Diseases	Transport and catabolism;Infectious diseases;Signal transduction;Infectious diseases	ko04144//Endocytosis;ko05110//Vibrio cholerae infection;ko04072//Phospholipase D signaling pathway;ko05134//Legionellosis	K07937;K07937;K07937;K07937	GO:0005794//Golgi apparatus	GO:0017111//nucleoside-triphosphatase activity;GO:0032550//purine ribonucleoside binding	GO:0001505//regulation of neurotransmitter levels;GO:0001654//eye development;GO:0006486//protein glycosylation;GO:0007265//Ras protein signal transduction;GO:0022604//regulation of cell morphogenesis;GO:0022610//biological adhesion;GO:0030100//regulation of endocytosis;GO:0048193//Golgi vesicle transport;GO:1901532//regulation of hematopoietic progenitor cell differentiation
ncbi_113812469	2	6.49E-10	4.63E-09	LMF2	PREDICTED: lipase maturation factor 2-like isoform X1 [Wasmannia auropunctata]	-	-	-	-	GO:0016020//membrane	-	-
ncbi_113812488	2	6.61E-43	9.95E-42	CPNE8	PREDICTED: copine-8-like [Hyalella azteca]	-	-	-	-	-	-	-
ncbi_113812490	4	2.25E-65	4.54E-64	--	-	-	-	-	-	-	-	-
ncbi_113812493	3	9.53E-20	9.41E-19	chic	chicadae/profilin [Litopenaeus vannamei]	Cellular Processes;Environmental Information Processing;Environmental Information Processing;Human Diseases;Human Diseases	Cell motility;Signal transduction;Signal transduction;Infectious diseases;Infectious diseases	ko04810//Regulation of actin cytoskeleton;ko04015//Rap1 signaling pathway;ko04013//MAPK signaling pathway - fly;ko05131//Shigellosis;ko05132//Salmonella infection	K05759;K05759;K05759;K05759;K05759	-	-	-
ncbi_113812492	3	1.13E-174	4.51E-173	chic	chicadae/profilin [Litopenaeus vannamei]	Cellular Processes;Environmental Information Processing;Environmental Information Processing;Human Diseases;Human Diseases	Cell motility;Signal transduction;Signal transduction;Infectious diseases;Infectious diseases	ko04810//Regulation of actin cytoskeleton;ko04015//Rap1 signaling pathway;ko04013//MAPK signaling pathway - fly;ko05131//Shigellosis;ko05132//Salmonella infection	K05759;K05759;K05759;K05759;K05759	-	-	-
ncbi_113812494	3	1.49E-72	3.21E-71	EIF4A2	eukaryotic initiation factor 4A [Litopenaeus vannamei]	Genetic Information Processing	Translation	ko03013//RNA transport	K03257	-	-	-
ncbi_113812500	2	6.75E-75	1.48E-73	MRPS28	AAEL003730-PA [Aedes aegypti]	-	-	-	-	-	-	-
ncbi_113812521	2	5.38E-78	1.21E-76	EXOSC1	PREDICTED: exosome complex component CSL4-like [Hyalella azteca]	Genetic Information Processing	Folding, sorting and degradation	ko03018//RNA degradation	K07573	-	-	-
ncbi_113812520	2	4.08E-14	3.43E-13	--	PREDICTED: diablo homolog, mitochondrial [Kryptolebias marmoratus]	-	-	-	-	-	-	-
ncbi_113812536	2	5.60E-80	1.28E-78	Polr1c	PREDICTED: DNA-directed RNA polymerases I and III subunit RPAC1-like [Lingula anatina]	Metabolism;Metabolism;Human Diseases;Metabolism;Genetic Information Processing;Organismal Systems	Global and overview maps;Nucleotide metabolism;Infectious diseases;Nucleotide metabolism;Transcription;Immune system	ko01100//Metabolic pathways;ko00230//Purine metabolism;ko05169//Epstein-Barr virus infection;ko00240//Pyrimidine metabolism;ko03020//RNA polymerase;ko04623//Cytosolic DNA-sensing pathway	K03027;K03027;K03027;K03027;K03027;K03027	-	-	-
ncbi_113812537	2	3.97E-92	1.00E-90	ccdc25	PREDICTED: coiled-coil domain-containing protein 25-like [Hyalella azteca]	-	-	-	-	-	-	-
ncbi_113812538	2	6.70E-198	2.88E-196	--	death-associated protein-like [Penaeus monodon]	-	-	-	-	-	-	-
ncbi_113812554	4	0	0	--	PREDICTED: synaptotagmin-7-like [Limulus polyphemus]	-	-	-	-	-	-	-
ncbi_113812556	3	8.52E-76	1.89E-74	PTGR1	PREDICTED: prostaglandin reductase 1-like [Hyalella azteca]	-	-	-	-	-	-	-
ncbi_113812564	2	2.87E-164	1.10E-162	AKR1B1	prostaglandin F synthase [Penaeus monodon]	Metabolism;Metabolism;Metabolism;Metabolism;Metabolism;Metabolism	Global and overview maps;Lipid metabolism;Carbohydrate metabolism;Carbohydrate metabolism;Metabolism of cofactors and vitamins;Carbohydrate metabolism	ko01100//Metabolic pathways;ko00561//Glycerolipid metabolism;ko00051//Fructose and mannose metabolism;ko00040//Pentose and glucuronate interconversions;ko00790//Folate biosynthesis;ko00052//Galactose metabolism	K00011;K00011;K00011;K00011;K00011;K00011	-	-	-
ncbi_113812569	4	3.38E-19	3.29E-18	DDX39B	PREDICTED: spliceosome RNA helicase DDX39B-like [Hyalella azteca]	Genetic Information Processing;Human Diseases;Genetic Information Processing;Genetic Information Processing	Translation;Infectious diseases;Transcription;Translation	ko03013//RNA transport;ko05164//Influenza A;ko03040//Spliceosome;ko03015//mRNA surveillance pathway	K12812;K12812;K12812;K12812	GO:0016604//nuclear body;GO:0043234//protein complex;GO:0097525//spliceosomal snRNP complex	GO:0003724//RNA helicase activity;GO:0005515//protein binding;GO:0017069//snRNA binding;GO:0032550//purine ribonucleoside binding;GO:0042623//ATPase activity, coupled	GO:0000077//DNA damage checkpoint;GO:0000377//RNA splicing, via transesterification reactions with bulged adenosine as nucleophile;GO:0006406//mRNA export from nucleus;GO:0022618//ribonucleoprotein complex assembly;GO:0032784//regulation of DNA-templated transcription, elongation
ncbi_113812596	4	2.39E-11	1.81E-10	--	PREDICTED: uncharacterized protein LOC108671656 [Hyalella azteca]	-	-	-	-	-	-	-
ncbi_113812601	4	5.96E-16	5.31E-15	Pik3cd	phosphatidylinositol-4,5-bisphosphate 3-kinase catalytic subunit delta isoform [Fenneropenaeus chinensis]	Metabolism;Human Diseases;Human Diseases;Cellular Processes;Human Diseases;Environmental Information Processing;Human Diseases;Cellular Processes;Organismal Systems;Cellular Processes;Environmental Information Processing;Organismal Systems;Human Diseases;Human Diseases;Human Diseases;Human Diseases;Environmental Information Processing;Human Diseases;Human Diseases;Organismal Systems;Environmental…	Global and overview maps;Cancers;Infectious diseases;Cellular community - eukaryotes;Cancers;Signal transduction;Cancers;Cell motility;Endocrine system;Cell growth and death;Signal transduction;Immune system;Cancers;Infectious diseases;Infectious diseases;Cardiovascular diseases;Signal transduction;Cancers;Infectious diseases;Aging;Signal transduction;Cancers;Signal transduction;Infectious diseas…	ko01100//Metabolic pathways;ko05200//Pathways in cancer;ko05165//Human papillomavirus infection;ko04510//Focal adhesion;ko05205//Proteoglycans in cancer;ko04151//PI3K-Akt signaling pathway;ko05225//Hepatocellular carcinoma;ko04810//Regulation of actin cytoskeleton;ko04919//Thyroid hormone signaling pathway;ko04210//Apoptosis;ko04015//Rap1 signaling pathway;ko04611//Platelet activation;ko05231//Ch…	K00922;K00922;K00922;K00922;K00922;K00922;K00922;K00922;K00922;K00922;K00922;K00922;K00922;K00922;K00922;K00922;K00922;K00922;K00922;K00922;K00922;K00922;K00922;K00922;K00922;K00922;K00922;K00922;K00922;K00922;K00922;K00922;K00922;K00922;K00922;K00922;K00922;K00922;K00922;K00922;K00922;K00922;K00922;K00922;K00922;K00922;K00922;K00922;K00922;K00922;K00922;K00922;K00922;K00922;K00922;K00922;K00922;…	-	GO:0016772//transferase activity, transferring phosphorus-containing groups	GO:0009987//cellular process
ncbi_113812604	1	9.33E-31	1.18E-29	--	-	-	-	-	-	-	-	-
ncbi_113812626	3	9.77E-126	3.06E-124	CIB1	PREDICTED: calcium and integrin-binding protein 1-like [Branchiostoma belcheri]	-	-	-	-	-	-	-
ncbi_113812629	4	2.18E-16	1.97E-15	TAF9	PREDICTED: transcription initiation factor TFIID subunit 9 [Cephus cinctus]	Human Diseases;Genetic Information Processing	Infectious diseases;Transcription	ko05168//Herpes simplex infection;ko03022//Basal transcription factors	K03133;K03133	-	-	-
ncbi_113812674	4	2.50E-13	2.04E-12	POLA2	PREDICTED: DNA polymerase alpha subunit B-like isoform X2 [Hyalella azteca]	Metabolism;Metabolism;Metabolism;Genetic Information Processing	Global and overview maps;Nucleotide metabolism;Nucleotide metabolism;Replication and repair	ko01100//Metabolic pathways;ko00230//Purine metabolism;ko00240//Pyrimidine metabolism;ko03030//DNA replication	K02321;K02321;K02321;K02321	-	-	-
ncbi_113812677	2	1.76E-68	3.64E-67	CSNK2A1	Casein kinase II subunit alpha [Daphnia magna]	Cellular Processes;Human Diseases;Environmental Information Processing;Human Diseases;Genetic Information Processing;Human Diseases;Environmental Information Processing;Cellular Processes	Cellular community - eukaryotes;Infectious diseases;Signal transduction;Infectious diseases;Translation;Infectious diseases;Signal transduction;Transport and catabolism	ko04520//Adherens junction;ko05169//Epstein-Barr virus infection;ko04310//Wnt signaling pathway;ko05168//Herpes simplex infection;ko03008//Ribosome biogenesis in eukaryotes;ko05162//Measles;ko04064//NF-kappa B signaling pathway;ko04137//Mitophagy - animal	K03097;K03097;K03097;K03097;K03097;K03097;K03097;K03097	-	-	-
ncbi_113812697	2	1.25E-13	1.03E-12	--	PREDICTED: leucine-rich repeat-containing protein 20 isoform X2 [Orussus abietinus]	-	-	-	-	-	-	-
ncbi_113812701	3	1.67E-17	1.56E-16	PGP	PREDICTED: glycerol-3-phosphate phosphatase-like [Hyalella azteca]	Metabolism;Metabolism;Metabolism	Global and overview maps;Global and overview maps;Carbohydrate metabolism	ko01100//Metabolic pathways;ko01200//Carbon metabolism;ko00630//Glyoxylate and dicarboxylate metabolism	K19269;K19269;K19269	-	-	-
ncbi_113812704	4	1.13E-13	9.35E-13	--	PREDICTED: telomere-associated protein RIF1-like [Hyalella azteca]	Cellular Processes	Cellular community - eukaryotes	ko04550//Signaling pathways regulating pluripotency of stem cells	K11138	-	-	-
ncbi_113812736	4	6.10E-25	6.88E-24	--	-	-	-	-	-	-	-	-
ncbi_113812754	3	7.78E-13	6.23E-12	--	PREDICTED: serine/threonine-protein phosphatase 6 regulatory ankyrin repeat subunit A-like, partial [Amphimedon queenslandica]	-	-	-	-	-	-	-
ncbi_113812758	2	0	0	NHP2	PREDICTED: H/ACA ribonucleoprotein complex subunit 2-like protein [Limulus polyphemus]	Genetic Information Processing	Translation	ko03008//Ribosome biogenesis in eukaryotes	K11129	-	-	-
ncbi_113812763	2	1.14E-18	1.09E-17	Naa40	N-alpha-acetyltransferase 40 [Coptotermes formosanus]	-	-	-	-	-	GO:0004772//sterol O-acyltransferase activity;GO:0008080//N-acetyltransferase activity;GO:0016409//palmitoyltransferase activity;GO:0016417//S-acyltransferase activity;GO:0019107//myristoyltransferase activity	GO:0044238//primary metabolic process
ncbi_113812764	4	1.79E-11	1.36E-10	DPYD	PREDICTED: dihydropyrimidine dehydrogenase [NADP(+)]-like [Lingula anatina]	Metabolism;Metabolism;Metabolism;Metabolism;Metabolism	Global and overview maps;Xenobiotics biodegradation and metabolism;Nucleotide metabolism;Metabolism of other amino acids;Metabolism of cofactors and vitamins	ko01100//Metabolic pathways;ko00983//Drug metabolism - other enzymes;ko00240//Pyrimidine metabolism;ko00410//beta-Alanine metabolism;ko00770//Pantothenate and CoA biosynthesis	K00207;K00207;K00207;K00207;K00207	-	-	-
ncbi_113812784	2	6.50E-16	5.78E-15	Dis3	PREDICTED: exosome complex exonuclease RRP44-like [Hyalella azteca]	Genetic Information Processing	Folding, sorting and degradation	ko03018//RNA degradation	K12585	-	-	-
ncbi_113812795	2	1.25E-26	1.45E-25	--	-	-	-	-	-	-	-	-
ncbi_113812799	4	5.40E-11	4.02E-10	nle1	PREDICTED: notchless protein homolog 1-like [Hyalella azteca]	-	-	-	-	GO:0043231//intracellular membrane-bounded organelle;GO:0043232//intracellular non-membrane-bounded organelle	-	GO:0000278//mitotic cell cycle;GO:0022613//ribonucleoprotein complex biogenesis;GO:0030177//positive regulation of Wnt signaling pathway;GO:0043154//negative regulation of cysteine-type endopeptidase activity involved in apoptotic process;GO:0048872//homeostasis of number of cells
ncbi_113812801	5	5.75E-27	6.74E-26	--	PREDICTED: uncharacterized protein LOC108666010 [Hyalella azteca]	-	-	-	-	-	-	-
ncbi_113812814	4	1.46E-173	5.77E-172	PPAF2	masquerade-like serine proteinase-like protein 3 [Penaeus monodon]	-	-	-	-	-	-	-
ncbi_113812815	4	3.05E-13	2.48E-12	thoc6	PREDICTED: THO complex subunit 6 homolog [Hyalella azteca]	Genetic Information Processing	Translation	ko03013//RNA transport	K13175	-	-	-
ncbi_113812825	4	4.74E-174	1.88E-172	--	-	-	-	-	-	-	-	-
ncbi_113812828	2	1.17E-12	9.35E-12	--	-	-	-	-	-	-	-	-
ncbi_113812822	2	2.58E-44	3.94E-43	GSPT1	PREDICTED: eukaryotic peptide chain release factor GTP-binding subunit ERF3A-like [Hyalella azteca]	Genetic Information Processing	Translation	ko03015//mRNA surveillance pathway	K03267	-	GO:0017111//nucleoside-triphosphatase activity;GO:0032550//purine ribonucleoside binding	-
ncbi_113812833	5	7.54E-29	9.19E-28	Furin	PREDICTED: furin-1-like isoform X2 [Poecilia mexicana]	Human Diseases	Infectious diseases	ko05164//Influenza A	K01349	-	GO:0016787//hydrolase activity	GO:0033333//fin development;GO:0048513//animal organ development;GO:0048598//embryonic morphogenesis
ncbi_113812834	3	9.91E-19	9.55E-18	Postn	PREDICTED: periostin-like [Hyalella azteca]	-	-	-	-	-	-	-
ncbi_113812859	3	4.40E-12	3.43E-11	Akt1	serine/threonine-specific protein kinase AKT [Fenneropenaeus chinensis]	Human Diseases;Human Diseases;Cellular Processes;Human Diseases;Environmental Information Processing;Human Diseases;Organismal Systems;Cellular Processes;Environmental Information Processing;Organismal Systems;Human Diseases;Human Diseases;Human Diseases;Human Diseases;Environmental Information Processing;Environmental Information Processing;Organismal Systems;Environmental Information Processing…	Cancers;Infectious diseases;Cellular community - eukaryotes;Cancers;Signal transduction;Cancers;Endocrine system;Cell growth and death;Signal transduction;Immune system;Cancers;Infectious diseases;Infectious diseases;Cardiovascular diseases;Signal transduction;Signal transduction;Aging;Signal transduction;Circulatory system;Signal transduction;Signal transduction;Infectious diseases;Transport and…	ko05200//Pathways in cancer;ko05165//Human papillomavirus infection;ko04510//Focal adhesion;ko05205//Proteoglycans in cancer;ko04151//PI3K-Akt signaling pathway;ko05225//Hepatocellular carcinoma;ko04919//Thyroid hormone signaling pathway;ko04210//Apoptosis;ko04015//Rap1 signaling pathway;ko04611//Platelet activation;ko05231//Choline metabolism in cancer;ko05164//Influenza A;ko05166//HTLV-I infect…	K04456;K04456;K04456;K04456;K04456;K04456;K04456;K04456;K04456;K04456;K04456;K04456;K04456;K04456;K04456;K04456;K04456;K04456;K04456;K04456;K04456;K04456;K04456;K04456;K04456;K04456;K04456;K04456;K04456;K04456;K04456;K04456;K04456;K04456;K04456;K04456;K04456;K04456;K04456;K04456;K04456;K04456;K04456;K04456;K04456;K04456;K04456;K04456;K04456;K04456;K04456;K04456;K04456;K04456;K04456;K04456;K04456;…	-	GO:0004674//protein serine/threonine kinase activity	GO:0006796//phosphate-containing compound metabolic process;GO:0044238//primary metabolic process;GO:0044260//cellular macromolecule metabolic process
ncbi_113812878	2	1.08E-32	1.41E-31	MRPS18C	PREDICTED: 28S ribosomal protein S18c, mitochondrial-like [Hyalella azteca]	Genetic Information Processing	Translation	ko03010//Ribosome	K02963	-	-	-
ncbi_113812879	4	8.76E-26	1.01E-24	Elmod3	PREDICTED: ELMO domain-containing protein 3 [Scleropages formosus]	-	-	-	-	-	-	-
ncbi_113812897	2	3.27E-93	8.28E-92	ACAA2	PREDICTED: 3-ketoacyl-CoA thiolase, mitochondrial-like [Hyalella azteca]	Metabolism;Metabolism;Metabolism;Metabolism;Metabolism	Global and overview maps;Amino acid metabolism;Lipid metabolism;Global and overview maps;Lipid metabolism	ko01100//Metabolic pathways;ko00280//Valine, leucine and isoleucine degradation;ko00071//Fatty acid degradation;ko01212//Fatty acid metabolism;ko00062//Fatty acid elongation	K07508;K07508;K07508;K07508;K07508	-	GO:0016746//transferase activity, transferring acyl groups	-
ncbi_113812898	4	8.99E-47	1.43E-45	U2af38	PREDICTED: splicing factor U2af 38 kDa subunit [Anoplophora glabripennis]	Genetic Information Processing;Human Diseases	Transcription;Infectious diseases	ko03040//Spliceosome;ko05131//Shigellosis	K12836;K12836	GO:0043231//intracellular membrane-bounded organelle	GO:0003676//nucleic acid binding;GO:0043169//cation binding	-
ncbi_113812899	2	1.18E-68	2.44E-67	--	AAEL000046-PA [Aedes aegypti]	-	-	-	-	-	-	-
ncbi_113812895	3	7.38E-49	1.21E-47	--	PREDICTED: titin isoform X2 [Eufriesea mexicana]	-	-	-	-	-	-	-
ncbi_113812900	4	6.83E-194	2.89E-192	pyx	PREDICTED: transient receptor potential cation channel subfamily A member 1-like [Hyalella azteca]	Organismal Systems	Sensory system	ko04750//Inflammatory mediator regulation of TRP channels	K04984	-	-	-
ncbi_113812905	4	1.04E-11	8.00E-11	--	-	-	-	-	-	-	-	-
ncbi_113812913	3	3.14E-30	3.94E-29	Bdh2	PREDICTED: 3-hydroxybutyrate dehydrogenase type 2 isoform X2 [Microtus ochrogaster]	Metabolism;Metabolism;Metabolism	Global and overview maps;Carbohydrate metabolism;Lipid metabolism	ko01100//Metabolic pathways;ko00650//Butanoate metabolism;ko00072//Synthesis and degradation of ketone bodies	K00019;K00019;K00019	GO:0031988//membrane-bounded vesicle;GO:0043231//intracellular membrane-bounded organelle	GO:0000166//nucleotide binding;GO:0004033//aldo-keto reductase (NADP) activity;GO:0016229//steroid dehydrogenase activity;GO:0016627//oxidoreductase activity, acting on the CH-CH group of donors	GO:0006778//porphyrin-containing compound metabolic process;GO:0009062//fatty acid catabolic process;GO:0009237//siderophore metabolic process;GO:0030154//cell differentiation;GO:0055076//transition metal ion homeostasis
ncbi_113812915	4	5.17E-56	9.34E-55	--	PREDICTED: tethering factor for nuclear proteasome sts1 [Bemisia tabaci]	-	-	-	-	-	-	-
ncbi_113812916	5	2.30E-54	4.08E-53	ADGRG6	lipoprotein receptor [Callinectes sapidus]	-	-	-	-	-	-	-
ncbi_113812926	4	4.33E-15	3.75E-14	--	PREDICTED: zinc finger protein 525-like [Hyalella azteca]	-	-	-	-	-	GO:0005488//binding	-
ncbi_113812934	3	4.61E-12	3.59E-11	--	neuroglobin isoform 1 [Cherax cainii]	-	-	-	-	-	-	-
ncbi_113812970	2	7.96E-11	5.89E-10	faf2	PREDICTED: FAS-associated factor 2-like [Parasteatoda tepidariorum]	-	-	-	-	GO:0043229//intracellular organelle	-	-
ncbi_113812972	1	0	0	Ces2c	juvenile hormone esterase-like carboxylesterase 1 [Eriocheir sinensis]	Metabolism	Metabolism of terpenoids and polyketides	ko00981//Insect hormone biosynthesis	K01063	-	-	-
ncbi_113812974	2	1.13E-18	1.09E-17	CG1542	PREDICTED: probable rRNA-processing protein EBP2 homolog isoform X1 [Cephus cinctus]	-	-	-	-	-	-	-
ncbi_113812980	1	2.31E-36	3.17E-35	AHCYL2	PREDICTED: adenosylhomocysteinase 2-like isoform X1 [Cephus cinctus]	Metabolism;Metabolism	Global and overview maps;Amino acid metabolism	ko01100//Metabolic pathways;ko00270//Cysteine and methionine metabolism	K01251;K01251	-	-	-
ncbi_113812963	3	1.01E-16	9.16E-16	--	-	-	-	-	-	-	-	-
ncbi_113812982	5	7.74E-53	1.34E-51	Rex1bd	fed tick salivary protein 6 [Ixodes scapularis]	-	-	-	-	-	-	-
ncbi_113812990	2	3.19E-58	5.92E-57	Mrpl3	PREDICTED: 39S ribosomal protein L3, mitochondrial [Cephus cinctus]	Genetic Information Processing	Translation	ko03010//Ribosome	K02906	-	-	-
ncbi_113812988	2	2.15E-57	3.95E-56	GOT2	aspartate aminotransferase [Fenneropenaeus chinensis]	Metabolism;Metabolism;Metabolism;Metabolism;Metabolism;Metabolism;Organismal Systems;Metabolism;Metabolism;Metabolism;Metabolism;Metabolism	Global and overview maps;Global and overview maps;Global and overview maps;Amino acid metabolism;Amino acid metabolism;Amino acid metabolism;Digestive system;Global and overview maps;Amino acid metabolism;Amino acid metabolism;Amino acid metabolism;Amino acid metabolism	ko01100//Metabolic pathways;ko01200//Carbon metabolism;ko01230//Biosynthesis of amino acids;ko00330//Arginine and proline metabolism;ko00270//Cysteine and methionine metabolism;ko00250//Alanine, aspartate and glutamate metabolism;ko04975//Fat digestion and absorption;ko01210//2-Oxocarboxylic acid metabolism;ko00350//Tyrosine metabolism;ko00220//Arginine biosynthesis;ko00360//Phenylalanine metabol…	K14455;K14455;K14455;K14455;K14455;K14455;K14455;K14455;K14455;K14455;K14455;K14455	-	-	-
ncbi_113812991	2	7.17E-24	7.87E-23	Trnau1ap	PREDICTED: tRNA selenocysteine 1-associated protein 1-like [Hyalella azteca]	-	-	-	-	-	-	-
ncbi_113813010	2	2.63E-51	4.47E-50	--	PREDICTED: uncharacterized protein LOC108678870 [Hyalella azteca]	-	-	-	-	-	-	-
ncbi_113813020	2	0	0	Act5C	beta-actin [Litopenaeus vannamei]	Organismal Systems;Cellular Processes;Human Diseases;Cellular Processes;Human Diseases;Cellular Processes;Cellular Processes;Organismal Systems;Cellular Processes;Environmental Information Processing;Environmental Information Processing;Organismal Systems;Human Diseases;Human Diseases;Organismal Systems;Human Diseases;Cellular Processes;Organismal Systems;Human Diseases;Human Diseases;Human Disea…	Environmental adaptation;Cellular community - eukaryotes;Cancers;Transport and catabolism;Cancers;Cell motility;Cellular community - eukaryotes;Endocrine system;Cell growth and death;Signal transduction;Signal transduction;Sensory system;Cardiovascular diseases;Cardiovascular diseases;Immune system;Infectious diseases;Cellular community - eukaryotes;Endocrine system;Cardiovascular diseases;Infect…	ko04714//Thermogenesis;ko04510//Focal adhesion;ko05205//Proteoglycans in cancer;ko04145//Phagosome;ko05225//Hepatocellular carcinoma;ko04810//Regulation of actin cytoskeleton;ko04530//Tight junction;ko04919//Thyroid hormone signaling pathway;ko04210//Apoptosis;ko04390//Hippo signaling pathway;ko04015//Rap1 signaling pathway;ko04745//Phototransduction - fly;ko05410//Hypertrophic cardiomyopathy (HC…	K05692;K05692;K05692;K05692;K05692;K05692;K05692;K05692;K05692;K05692;K05692;K05692;K05692;K05692;K05692;K05692;K05692;K05692;K05692;K05692;K05692;K05692;K05692;K05692;K05692;K05692;K05692;K05692;K05692	-	GO:0032550//purine ribonucleoside binding	-
ncbi_113813043	2	9.69E-81	2.23E-79	NSFL1C	PREDICTED: NSFL1 cofactor p47-like [Hyalella azteca]	Genetic Information Processing	Folding, sorting and degradation	ko04141//Protein processing in endoplasmic reticulum	K14012	-	-	-
ncbi_113813047	3	1.48E-90	3.69E-89	--	PREDICTED: uncharacterized protein LOC104963230 [Notothenia coriiceps]	-	-	-	-	-	-	-
ncbi_113813053	2	0	0	Psmc4	26S protease regulatory subunit 6b [Riptortus pedestris]	Human Diseases;Genetic Information Processing	Infectious diseases;Folding, sorting and degradation	ko05169//Epstein-Barr virus infection;ko03050//Proteasome	K03063;K03063	-	-	-
ncbi_113813063	3	2.47E-82	5.78E-81	--	PREDICTED: uncharacterized protein LOC108679670 [Hyalella azteca]	-	-	-	-	-	-	-
ncbi_113813083	2	3.40E-18	3.24E-17	trmt10a	PREDICTED: tRNA methyltransferase 10 homolog A-like [Hyalella azteca]	-	-	-	-	-	-	-
ncbi_113813082	2	2.56E-137	8.70E-136	psmc3-b	PREDICTED: 26S protease regulatory subunit 6A-B [Hyalella azteca]	Human Diseases;Genetic Information Processing	Infectious diseases;Folding, sorting and degradation	ko05169//Epstein-Barr virus infection;ko03050//Proteasome	K03065;K03065	GO:0044424//intracellular part	GO:0003824//catalytic activity;GO:0032550//purine ribonucleoside binding	GO:0009057//macromolecule catabolic process
ncbi_113813084	4	1.56E-123	4.83E-122	Lam	PREDICTED: lamin Dm0 isoform X2 [Cerapachys biroi]	Cellular Processes;Cellular Processes	Cell growth and death;Cell growth and death	ko04210//Apoptosis;ko04214//Apoptosis - fly	K07611;K07611	-	-	-
ncbi_113813105	3	4.93E-18	4.67E-17	Ets98B	PREDICTED: SAM pointed domain-containing Ets transcription factor-like [Limulus polyphemus]	-	-	-	-	-	-	-
ncbi_113813108	4	1.51E-48	2.45E-47	--	PREDICTED: uncharacterized protein LOC108665554 [Hyalella azteca]	-	-	-	-	-	-	-
ncbi_113813124	2	1.30E-49	2.16E-48	--	PREDICTED: active regulator of SIRT1-like [Lingula anatina]	-	-	-	-	GO:0044424//intracellular part	-	-
ncbi_113813125	5	1.88E-194	7.98E-193	--	PREDICTED: E3 ubiquitin-protein ligase TRIM32 isoform X4 [Poecilia reticulata]	-	-	-	-	-	GO:0005488//binding	GO:0044238//primary metabolic process;GO:0044260//cellular macromolecule metabolic process;GO:0044763//single-organism cellular process;GO:0048522//positive regulation of cellular process
ncbi_113813127	2	3.87E-15	3.36E-14	Ddx31	PREDICTED: probable ATP-dependent RNA helicase DDX31 [Lingula anatina]	-	-	-	-	GO:0043231//intracellular membrane-bounded organelle	GO:0003676//nucleic acid binding	-
ncbi_113813141	1	7.38E-16	6.55E-15	zgc:77739	PREDICTED: UPF0462 protein C4orf33 homolog isoform X1 [Anolis carolinensis]	-	-	-	-	-	-	-
ncbi_113813144	3	8.96E-107	2.52E-105	PSAP	saposin isoform 1 [Penaeus monodon]	Cellular Processes	Transport and catabolism	ko04142//Lysosome	K12382	-	-	-
ncbi_113813160	3	1.19E-14	1.02E-13	--	PREDICTED: bombesin receptor-activated protein C6orf89 homolog [Saccoglossus kowalevskii]	-	-	-	-	-	-	-
ncbi_113813162	1	1.16E-10	8.49E-10	cpped1	PREDICTED: serine/threonine-protein phosphatase CPPED1-like [Hyalella azteca]	-	-	-	-	-	-	-
ncbi_113813169	2	1.31E-08	8.79E-08	--	PREDICTED: ribonuclease P protein subunit p29-like [Saccoglossus kowalevskii]	Genetic Information Processing;Genetic Information Processing	Translation;Translation	ko03013//RNA transport;ko03008//Ribosome biogenesis in eukaryotes	K03538;K03538	-	-	GO:0016070//RNA metabolic process
ncbi_113813171	2	1.93E-11	1.46E-10	--	AGAP004983-PA [Anopheles gambiae str. PEST] [Anopheles gambiae]	-	-	-	-	-	-	-
ncbi_113813189	2	7.91E-45	1.22E-43	CG9004	Nucleolar MIF4G domain-containing protein 1 [Zootermopsis nevadensis]	-	-	-	-	-	-	-
ncbi_113813197	3	9.51E-17	8.67E-16	KLHL23	Kelch-like protein 38 [Zootermopsis nevadensis]	-	-	-	-	-	-	-
ncbi_113813198	3	2.51E-11	1.89E-10	--	PREDICTED: diphosphoinositol polyphosphate phosphohydrolase 3-beta-like [Oryzias latipes]	-	-	-	-	-	-	-
ncbi_113813238	2	2.60E-123	8.01E-122	G-s-alpha-60A	G protein s alpha subunit [Litopenaeus vannamei]	Human Diseases;Organismal Systems;Human Diseases;Environmental Information Processing;Human Diseases;Organismal Systems;Organismal Systems;Organismal Systems;Human Diseases;Organismal Systems;Environmental Information Processing;Human Diseases;Human Diseases;Organismal Systems;Environmental Information Processing;Environmental Information Processing;Organismal Systems;Human Diseases;Organismal Sy…	Cancers;Environmental adaptation;Infectious diseases;Signal transduction;Cardiovascular diseases;Immune system;Endocrine system;Digestive system;Substance dependence;Circulatory system;Signal transduction;Infectious diseases;Endocrine and metabolic diseases;Digestive system;Signal transduction;Signal transduction;Endocrine system;Infectious diseases;Circulatory system;Nervous system;Infectious di…	ko05200//Pathways in cancer;ko04714//Thermogenesis;ko05165//Human papillomavirus infection;ko04015//Rap1 signaling pathway;ko05414//Dilated cardiomyopathy (DCM);ko04611//Platelet activation;ko04921//Oxytocin signaling pathway;ko04972//Pancreatic secretion;ko05034//Alcoholism;ko04261//Adrenergic signaling in cardiomyocytes;ko04024//cAMP signaling pathway;ko05110//Vibrio cholerae infection;ko04934/…	K04632;K04632;K04632;K04632;K04632;K04632;K04632;K04632;K04632;K04632;K04632;K04632;K04632;K04632;K04632;K04632;K04632;K04632;K04632;K04632;K04632;K04632;K04632;K04632;K04632;K04632;K04632;K04632;K04632;K04632;K04632;K04632;K04632;K04632;K04632;K04632;K04632;K04632;K04632;K04632;K04632;K04632;K04632;K04632;K04632;K04632;K04632;K04632	-	GO:0017076//purine nucleotide binding;GO:0017111//nucleoside-triphosphatase activity;GO:0032403//protein complex binding;GO:0032550//purine ribonucleoside binding;GO:0060089//molecular transducer activity	GO:0007166//cell surface receptor signaling pathway
ncbi_113813243	2	1.17E-22	1.24E-21	GH12525	PREDICTED: NAD(P)H-hydrate epimerase-like isoform X1 [Hyalella azteca]	-	-	-	-	-	GO:0005488//binding;GO:0016853//isomerase activity	-
ncbi_113813244	2	1.12E-17	1.05E-16	--	PREDICTED: nucleoporin Nup37-like [Hyalella azteca]	Genetic Information Processing	Translation	ko03013//RNA transport	K14302	-	-	-
ncbi_113813252	4	1.92E-13	1.58E-12	UPF2	PREDICTED: regulator of nonsense transcripts 2 isoform X2 [Rhinopithecus roxellana]	Genetic Information Processing;Genetic Information Processing	Translation;Translation	ko03013//RNA transport;ko03015//mRNA surveillance pathway	K14327;K14327	-	-	-
ncbi_113813284	2	4.73E-226	2.22E-224	--	-	-	-	-	-	-	-	-
ncbi_113813288	5	1.19E-13	9.80E-13	LONP1	PREDICTED: lon protease homolog, mitochondrial isoform X2 [Camponotus floridanus]	-	-	-	-	-	-	-
ncbi_113813291	1	7.02E-27	8.20E-26	Xkr4	XK-related protein [Daphnia magna]	-	-	-	-	-	-	-
ncbi_113813294	4	9.23E-101	2.46E-99	Nucb2	PREDICTED: nucleobindin-2-like, partial [Hyalella azteca]	-	-	-	-	-	-	-
ncbi_113813302	2	0	0	Fib	PREDICTED: rRNA 2'-O-methyltransferase fibrillarin [Drosophila eugracilis]	Genetic Information Processing	Translation	ko03008//Ribosome biogenesis in eukaryotes	K14563	GO:0016604//nuclear body;GO:0030529//intracellular ribonucleoprotein complex;GO:0044452//nucleolar part	GO:0003676//nucleic acid binding;GO:0016741//transferase activity, transferring one-carbon groups	GO:0006399//tRNA metabolic process;GO:0010467//gene expression;GO:0016072//rRNA metabolic process;GO:0031023//microtubule organizing center organization;GO:0033554//cellular response to stress
ncbi_113813303	3	5.04E-35	6.77E-34	--	PREDICTED: trace amine-associated receptor 7d-like [Takifugu rubripes]	-	-	-	-	-	-	-
ncbi_113813311	2	0	0	vha-10	PREDICTED: V-type proton ATPase subunit G-like [Limulus polyphemus]	Metabolism;Human Diseases;Cellular Processes;Environmental Information Processing;Human Diseases;Metabolism;Human Diseases;Organismal Systems;Human Diseases;Organismal Systems	Global and overview maps;Infectious diseases;Transport and catabolism;Signal transduction;Infectious diseases;Energy metabolism;Infectious diseases;Nervous system;Immune diseases;Excretory system	ko01100//Metabolic pathways;ko05165//Human papillomavirus infection;ko04145//Phagosome;ko04150//mTOR signaling pathway;ko05110//Vibrio cholerae infection;ko00190//Oxidative phosphorylation;ko05120//Epithelial cell signaling in Helicobacter pylori infection;ko04721//Synaptic vesicle cycle;ko05323//Rheumatoid arthritis;ko04966//Collecting duct acid secretion	K02152;K02152;K02152;K02152;K02152;K02152;K02152;K02152;K02152;K02152	GO:0033176//proton-transporting V-type ATPase complex	GO:0022857//transmembrane transporter activity	GO:0044763//single-organism cellular process
ncbi_113813315	2	1.75E-11	1.33E-10	Neurl2	Neuralized-like protein 2 [Zootermopsis nevadensis]	-	-	-	-	-	-	-
ncbi_113813320	4	5.06E-22	5.32E-21	Ork1	Open rectifier potassium channel protein 1 [Zootermopsis nevadensis]	-	-	-	-	-	-	-
ncbi_113813350	4	1.95E-37	2.72E-36	thoc7	PREDICTED: THO complex subunit 7 homolog [Hyalella azteca]	Genetic Information Processing	Translation	ko03013//RNA transport	K13176	-	-	-
ncbi_113813370	3	7.17E-11	5.32E-10	Ipo5	PREDICTED: importin-5-like [Priapulus caudatus]	-	-	-	-	-	-	-
ncbi_113813371	5	1.18E-33	1.56E-32	trappc2l	PREDICTED: trafficking protein particle complex subunit 2-like protein [Hyalella azteca]	-	-	-	-	-	-	GO:0006810//transport
ncbi_113813376	1	4.02E-232	1.93E-230	TUBA1A	PREDICTED: tubulin alpha-3 chain-like [Hyalella azteca]	Cellular Processes;Cellular Processes;Cellular Processes;Human Diseases;Cellular Processes	Transport and catabolism;Cellular community - eukaryotes;Cell growth and death;Infectious diseases;Cellular community - eukaryotes	ko04145//Phagosome;ko04530//Tight junction;ko04210//Apoptosis;ko05130//Pathogenic Escherichia coli infection;ko04540//Gap junction	K07374;K07374;K07374;K07374;K07374	-	-	-
ncbi_113813414	2	1.19E-64	2.38E-63	Vps60	PREDICTED: charged multivesicular body protein 5-like [Hyalella azteca]	Cellular Processes;Cellular Processes	Transport and catabolism;Cell growth and death	ko04144//Endocytosis;ko04217//Necroptosis	K12198;K12198	-	-	-
ncbi_113813415	4	5.75E-09	3.93E-08	SYMPK	Symplekin, partial [Zootermopsis nevadensis]	Cellular Processes;Genetic Information Processing	Cellular community - eukaryotes;Translation	ko04530//Tight junction;ko03015//mRNA surveillance pathway	K06100;K06100	-	-	-
ncbi_113813416	2	1.08E-59	2.05E-58	chchd4	Mitochondrial intermembrane space import and assembly protein 40-B [Daphnia magna]	-	-	-	-	-	-	-
ncbi_113813425	2	4.19E-121	1.28E-119	nap1l1-a	PREDICTED: nucleosome assembly protein 1-like 1 isoform X1 [Hyalella azteca]	-	-	-	-	-	-	-
ncbi_113813421	4	3.58E-21	3.67E-20	PPT1	Palmitoyl-protein thioesterase 1 [Trichinella sp. T6]	Metabolism;Cellular Processes;Metabolism;Metabolism	Global and overview maps;Transport and catabolism;Global and overview maps;Lipid metabolism	ko01100//Metabolic pathways;ko04142//Lysosome;ko01212//Fatty acid metabolism;ko00062//Fatty acid elongation	K01074;K01074;K01074;K01074	-	GO:0005488//binding	-
ncbi_113813419	4	7.43E-10	5.29E-09	--	-	-	-	-	-	-	-	-
ncbi_113813428	3	6.21E-12	4.81E-11	CNPPD1	PREDICTED: protein CNPPD1-like [Limulus polyphemus]	-	-	-	-	-	-	-
ncbi_113813429	2	2.52E-103	6.87E-102	NDUFA9	NADH-ubiquinone oxidoreductase 39 kda subunit [Culex quinquefasciatus]	Metabolism;Organismal Systems;Human Diseases;Human Diseases;Human Diseases;Human Diseases;Metabolism;Organismal Systems	Global and overview maps;Environmental adaptation;Neurodegenerative diseases;Neurodegenerative diseases;Endocrine and metabolic diseases;Neurodegenerative diseases;Energy metabolism;Nervous system	ko01100//Metabolic pathways;ko04714//Thermogenesis;ko05016//Huntington disease;ko05010//Alzheimer disease;ko04932//Non-alcoholic fatty liver disease (NAFLD);ko05012//Parkinson disease;ko00190//Oxidative phosphorylation;ko04723//Retrograde endocannabinoid signaling	K03953;K03953;K03953;K03953;K03953;K03953;K03953;K03953	-	GO:0048037//cofactor binding	-
ncbi_113813430	2	5.86E-73	1.26E-71	Taldo1	PREDICTED: transaldolase-like [Hyalella azteca]	Metabolism;Metabolism;Metabolism;Metabolism	Global and overview maps;Global and overview maps;Global and overview maps;Carbohydrate metabolism	ko01100//Metabolic pathways;ko01200//Carbon metabolism;ko01230//Biosynthesis of amino acids;ko00030//Pentose phosphate pathway	K00616;K00616;K00616;K00616	GO:0044424//intracellular part	GO:0016744//transferase activity, transferring aldehyde or ketonic groups	GO:0006739//NADP metabolic process
ncbi_113813423	3	4.88E-12	3.80E-11	--	-	-	-	-	-	-	-	-
ncbi_113813438	4	1.06E-39	1.53E-38	Aldh2	PREDICTED: aldehyde dehydrogenase, mitochondrial-like [Hyalella azteca]	Metabolism;Metabolism;Metabolism;Metabolism;Metabolism;Metabolism;Metabolism;Metabolism;Metabolism;Metabolism;Metabolism;Metabolism;Metabolism	Global and overview maps;Amino acid metabolism;Carbohydrate metabolism;Lipid metabolism;Amino acid metabolism;Amino acid metabolism;Carbohydrate metabolism;Lipid metabolism;Carbohydrate metabolism;Amino acid metabolism;Metabolism of other amino acids;Metabolism of terpenoids and polyketides;Amino acid metabolism	ko01100//Metabolic pathways;ko00310//Lysine degradation;ko00010//Glycolysis / Gluconeogenesis;ko00561//Glycerolipid metabolism;ko00330//Arginine and proline metabolism;ko00280//Valine, leucine and isoleucine degradation;ko00053//Ascorbate and aldarate metabolism;ko00071//Fatty acid degradation;ko00620//Pyruvate metabolism;ko00380//Tryptophan metabolism;ko00410//beta-Alanine metabolism;ko00981//In…	K00128;K00128;K00128;K00128;K00128;K00128;K00128;K00128;K00128;K00128;K00128;K00128;K00128	GO:0043232//intracellular non-membrane-bounded organelle;GO:0044429//mitochondrial part	GO:0016620//oxidoreductase activity, acting on the aldehyde or oxo group of donors, NAD or NADP as acceptor	GO:0032787//monocarboxylic acid metabolic process;GO:0097305//response to alcohol
ncbi_113813439	4	1.08E-28	1.31E-27	Stoml2	PREDICTED: stomatin-like protein 2, mitochondrial [Hyalella azteca]	-	-	-	-	-	-	-
ncbi_113813444	3	1.44E-20	1.46E-19	RAB11FIP5	PREDICTED: rab11 family-interacting protein 1-like isoform X2 [Hyalella azteca]	Cellular Processes	Transport and catabolism	ko04144//Endocytosis	K12484	-	-	-
ncbi_113813445	3	1.68E-114	4.95E-113	PSAP	saposin isoform 1 [Penaeus monodon]	Cellular Processes	Transport and catabolism	ko04142//Lysosome	K12382	-	-	-
ncbi_113813470	1	3.94E-11	2.95E-10	--	Cellular retinoic acid-binding protein 2 [Daphnia magna]	-	-	-	-	-	-	-
ncbi_113813477	3	2.50E-15	2.18E-14	--	EF-hand domain-containing protein D1 [Crassostrea gigas]	-	-	-	-	-	-	-
ncbi_113813479	2	1.33E-178	5.38E-177	znf593	PREDICTED: zinc finger protein 593 homolog [Trachymyrmex cornetzi]	-	-	-	-	-	-	-
ncbi_113813482	5	1.89E-11	1.44E-10	Parp1	PREDICTED: poly [ADP-ribose] polymerase [Athalia rosae]	Cellular Processes;Cellular Processes;Cellular Processes;Organismal Systems;Genetic Information Processing;Environmental Information Processing	Cell growth and death;Cell growth and death;Cell growth and death;Aging;Replication and repair;Signal transduction	ko04210//Apoptosis;ko04217//Necroptosis;ko04214//Apoptosis - fly;ko04212//Longevity regulating pathway - worm;ko03410//Base excision repair;ko04064//NF-kappa B signaling pathway	K10798;K10798;K10798;K10798;K10798;K10798	-	-	-
ncbi_113813488	1	3.11E-23	3.34E-22	--	-	-	-	-	-	-	-	-
ncbi_113813489	2	1.50E-141	5.25E-140	Gel	gelsolin [Homarus americanus]	Cellular Processes;Human Diseases;Organismal Systems	Cell motility;Cancers;Immune system	ko04810//Regulation of actin cytoskeleton;ko05203//Viral carcinogenesis;ko04666//Fc gamma R-mediated phagocytosis	K05768;K05768;K05768	-	-	-
ncbi_113813491	4	1.60E-13	1.32E-12	KIN	PREDICTED: DNA/RNA-binding protein KIN17-like [Hyalella azteca]	-	-	-	-	-	-	-
ncbi_113813493	2	3.43E-18	3.26E-17	Ech1	Delta(3,5)-Delta(2,4)-dienoyl-CoA isomerase, mitochondrial [Daphnia magna]	Cellular Processes	Transport and catabolism	ko04146//Peroxisome	K12663	-	-	-
ncbi_113813497	2	2.74E-32	3.55E-31	--	-	-	-	-	-	-	-	-
ncbi_113813498	3	1.22E-08	8.21E-08	wscd1	PREDICTED: WSC domain-containing protein 1-like [Hyalella azteca]	-	-	-	-	-	-	-
ncbi_113813513	4	3.83E-30	4.79E-29	BRD8	Bromodomain-containing protein 8 [Zootermopsis nevadensis]	-	-	-	-	-	-	-
ncbi_113813525	5	1.50E-17	1.39E-16	NSD2	PREDICTED: LOW QUALITY PROTEIN: histone-lysine N-methyltransferase NSD2-like [Limulus polyphemus]	Human Diseases;Metabolism	Cancers;Amino acid metabolism	ko05202//Transcriptional misregulation in cancers;ko00310//Lysine degradation	K11424;K11424	GO:0005634//nucleus	-	GO:0019219//regulation of nucleobase-containing compound metabolic process;GO:0044260//cellular macromolecule metabolic process;GO:0044710//single-organism metabolic process;GO:0044763//single-organism cellular process;GO:0048513//animal organ development;GO:0060255//regulation of macromolecule metabolic process;GO:0090304//nucleic acid metabolic process
ncbi_113813518	5	1.21E-25	1.38E-24	Dock2	PREDICTED: dedicator of cytokinesis protein 1 [Neodiprion lecontei]	Cellular Processes;Cellular Processes;Human Diseases;Human Diseases	Cellular community - eukaryotes;Cell motility;Infectious diseases;Infectious diseases	ko04510//Focal adhesion;ko04810//Regulation of actin cytoskeleton;ko05131//Shigellosis;ko05100//Bacterial invasion of epithelial cells	K13708;K13708;K13708;K13708	-	-	-
ncbi_113813532	2	8.41E-14	6.98E-13	COMMD4	PREDICTED: COMM domain-containing protein 4-like [Biomphalaria glabrata]	-	-	-	-	-	-	-
ncbi_113813533	4	1.22E-29	1.51E-28	rdgB	Protein retinal degeneration B [Zootermopsis nevadensis]	-	-	-	-	-	-	-
ncbi_113813538	5	3.08E-11	2.32E-10	--	PREDICTED: zinc finger protein OZF-like [Cynoglossus semilaevis]	-	-	-	-	-	-	-
ncbi_113813544	3	1.43E-63	2.84E-62	SDCBP	syntenin [Penaeus monodon]	-	-	-	-	-	-	-
ncbi_113813552	3	0	0	--	-	-	-	-	-	-	-	-
ncbi_113813553	3	2.55E-75	5.64E-74	Sdcbp	syntenin [Penaeus monodon]	-	-	-	-	-	-	-
ncbi_113813581	2	1.55E-23	1.69E-22	Hmg20a	PREDICTED: high mobility group protein 20A isoform X2 [Takifugu rubripes]	-	-	-	-	-	-	-
ncbi_113813586	1	0	0	Soat1	PREDICTED: sterol O-acyltransferase 1-like [Hyalella azteca]	Organismal Systems;Metabolism	Digestive system;Lipid metabolism	ko04979//Cholesterol metabolism;ko00100//Steroid biosynthesis	K00637;K00637	-	-	-
ncbi_113813588	1	1.04E-55	1.88E-54	NAAT1	PREDICTED: sodium-dependent nutrient amino acid transporter 1-like [Hyalella azteca]	-	-	-	-	-	-	-
ncbi_113813590	3	9.48E-16	8.36E-15	--	-	-	-	-	-	-	-	-
ncbi_113813591	2	7.43E-09	5.06E-08	--	-	-	-	-	-	-	-	-
ncbi_113813597	4	1.55E-16	1.41E-15	NAAT1	PREDICTED: sodium-dependent nutrient amino acid transporter 1-like [Hyalella azteca]	-	-	-	-	-	-	GO:0006810//transport
ncbi_113813598	1	0	0	--	single IB domain protein [Litopenaeus vannamei]	-	-	-	-	-	-	-
ncbi_113813573	5	3.48E-09	2.41E-08	ABCC1	PREDICTED: LOW QUALITY PROTEIN: multidrug resistance-associated protein 1-like, partial [Hyalella azteca]	Human Diseases;Environmental Information Processing;Organismal Systems;Environmental Information Processing;Human Diseases	Cancers;Signal transduction;Digestive system;Membrane transport;Drug resistance	ko05206//MicroRNAs in cancer;ko04071//Sphingolipid signaling pathway;ko04977//Vitamin digestion and absorption;ko02010//ABC transporters;ko01523//Antifolate resistance	K05665;K05665;K05665;K05665;K05665	-	-	-
ncbi_113813574	3	5.86E-32	7.55E-31	Stard13	PREDICTED: rho GTPase-activating protein 7-like [Hyalella azteca]	-	-	-	-	-	-	-
ncbi_113813620	1	4.67E-09	3.22E-08	--	NAD(P)H-dependent FMN reductase C4B3.06c [Orchesella cincta]	-	-	-	-	-	-	-
ncbi_113813622	2	2.95E-19	2.89E-18	Epn2	PREDICTED: epsin-2-like [Anoplophora glabripennis]	Cellular Processes	Transport and catabolism	ko04144//Endocytosis	K12471	-	-	-
ncbi_113813626	3	3.75E-19	3.65E-18	eif4e3-b	PREDICTED: eukaryotic translation initiation factor 4E type 3-like [Limulus polyphemus]	-	-	-	-	-	-	-
ncbi_113813670	4	9.39E-09	6.35E-08	NAA35	PREDICTED: N-alpha-acetyltransferase 35, NatC auxiliary subunit-like [Hyalella azteca]	-	-	-	-	-	-	-
ncbi_113813673	3	2.67E-23	2.88E-22	--	IMD [Litopenaeus vannamei]	-	-	-	-	-	-	-
ncbi_113813684	2	1.86E-198	8.01E-197	ANKMY2	PREDICTED: ankyrin repeat and MYND domain-containing protein 2-like [Hyalella azteca]	-	-	-	-	-	-	-
ncbi_113813685	3	1.21E-46	1.92E-45	Mpped1	PREDICTED: metallophosphoesterase domain-containing protein 1-like [Limulus polyphemus]	-	-	-	-	-	-	-
ncbi_113813700	4	1.29E-43	1.95E-42	Fit1	Fermitin family [Daphnia magna]	-	-	-	-	-	-	-
ncbi_113813688	2	2.90E-09	2.02E-08	Dnajc11	DnaJ-like protein subfamily C member 11 [Zootermopsis nevadensis]	-	-	-	-	-	-	-
ncbi_113813705	4	2.15E-18	2.05E-17	UBE2R2	ubiquitin-conjugating enyzme E2r [Marsupenaeus japonicus]	Genetic Information Processing;Human Diseases	Folding, sorting and degradation;Infectious diseases	ko04120//Ubiquitin mediated proteolysis;ko05168//Herpes simplex infection	K02207;K02207	-	GO:0003824//catalytic activity	-
ncbi_113813706	2	3.40E-233	1.64E-231	Uqcrfs1	Cytochrome b-c1 complex subunit Rieske, mitochondrial [Daphnia magna]	Metabolism;Organismal Systems;Human Diseases;Human Diseases;Human Diseases;Human Diseases;Metabolism;Organismal Systems	Global and overview maps;Environmental adaptation;Neurodegenerative diseases;Neurodegenerative diseases;Endocrine and metabolic diseases;Neurodegenerative diseases;Energy metabolism;Circulatory system	ko01100//Metabolic pathways;ko04714//Thermogenesis;ko05016//Huntington disease;ko05010//Alzheimer disease;ko04932//Non-alcoholic fatty liver disease (NAFLD);ko05012//Parkinson disease;ko00190//Oxidative phosphorylation;ko04260//Cardiac muscle contraction	K00411;K00411;K00411;K00411;K00411;K00411;K00411;K00411	-	-	-
ncbi_113813708	4	1.60E-107	4.51E-106	Caf1	PREDICTED: probable histone-binding protein Caf1 isoform X2 [Trachymyrmex zeteki]	Cellular Processes	Cell growth and death	ko04218//Cellular senescence	K10752	-	-	-
ncbi_113813711	4	4.02E-12	3.14E-11	--	-	-	-	-	-	-	-	-
ncbi_113813722	2	4.52E-224	2.11E-222	CYPA	PREDICTED: peptidyl-prolyl cis-trans isomerase A2-like isoform X1 [Hyalella azteca]	Human Diseases;Environmental Information Processing;Human Diseases;Environmental Information Processing;Human Diseases	Neurodegenerative diseases;Signal transduction;Neurodegenerative diseases;Signal transduction;Infectious diseases	ko05016//Huntington disease;ko04022//cGMP - PKG signaling pathway;ko05012//Parkinson disease;ko04020//Calcium signaling pathway;ko05145//Toxoplasmosis	K09565;K09565;K09565;K09565;K09565	-	GO:0016859//cis-trans isomerase activity	GO:0044267//cellular protein metabolic process
ncbi_113813724	4	3.43E-14	2.90E-13	Galphaq	Guanine nucleotide-binding protein G(q) subunit alpha [Cerapachys biroi]	Human Diseases;Human Diseases;Environmental Information Processing;Organismal Systems;Organismal Systems;Organismal Systems;Organismal Systems;Human Diseases;Environmental Information Processing;Organismal Systems;Human Diseases;Organismal Systems;Environmental Information Processing;Environmental Information Processing;Organismal Systems;Human Diseases;Organismal Systems;Organismal Systems;Human…	Cancers;Neurodegenerative diseases;Signal transduction;Sensory system;Immune system;Endocrine system;Digestive system;Neurodegenerative diseases;Signal transduction;Circulatory system;Endocrine and metabolic diseases;Digestive system;Signal transduction;Signal transduction;Nervous system;Infectious diseases;Circulatory system;Nervous system;Infectious diseases;Cellular community - eukaryotes;Nerv…	ko05200//Pathways in cancer;ko05016//Huntington disease;ko04015//Rap1 signaling pathway;ko04745//Phototransduction - fly;ko04611//Platelet activation;ko04921//Oxytocin signaling pathway;ko04972//Pancreatic secretion;ko05010//Alzheimer disease;ko04022//cGMP - PKG signaling pathway;ko04261//Adrenergic signaling in cardiomyocytes;ko04934//Cushing syndrome;ko04971//Gastric acid secretion;ko04071//Sph…	K04634;K04634;K04634;K04634;K04634;K04634;K04634;K04634;K04634;K04634;K04634;K04634;K04634;K04634;K04634;K04634;K04634;K04634;K04634;K04634;K04634;K04634;K04634;K04634;K04634;K04634;K04634;K04634;K04634;K04634;K04634;K04634;K04634;K04634;K04634;K04634;K04634;K04634;K04634;K04634;K04634;K04634	-	GO:0005102//receptor binding;GO:0017076//purine nucleotide binding;GO:0017111//nucleoside-triphosphatase activity;GO:0032403//protein complex binding;GO:0032550//purine ribonucleoside binding;GO:0060089//molecular transducer activity	GO:0007166//cell surface receptor signaling pathway
ncbi_113813736	2	0	0	RpL13A	PREDICTED: 60S ribosomal protein L13a-like [Limulus polyphemus]	Genetic Information Processing	Translation	ko03010//Ribosome	K02872	GO:0005840//ribosome	-	-
ncbi_113813738	4	6.05E-13	4.88E-12	natd1	PREDICTED: protein NATD1 [Clupea harengus]	-	-	-	-	-	-	-
ncbi_113813759	2	4.01E-21	4.10E-20	--	-	-	-	-	-	-	-	-
ncbi_113813774	1	1.02E-78	2.30E-77	Tmprss2	trypsin [Euphausia superba]	-	-	-	-	-	-	-
ncbi_113813771	3	1.42E-35	1.92E-34	--	PREDICTED: ETS-related transcription factor Elf-4-like [Hyalella azteca]	-	-	-	-	-	-	-
ncbi_113813818	4	5.30E-17	4.85E-16	for	PREDICTED: cGMP-dependent protein kinase, isozyme 2 forms cD5/T2-like [Hyalella azteca]	Organismal Systems;Organismal Systems;Environmental Information Processing;Organismal Systems;Cellular Processes;Organismal Systems;Organismal Systems;Organismal Systems;Organismal Systems;Organismal Systems	Environmental adaptation;Immune system;Signal transduction;Circulatory system;Cellular community - eukaryotes;Environmental adaptation;Digestive system;Nervous system;Endocrine system;Sensory system	ko04714//Thermogenesis;ko04611//Platelet activation;ko04022//cGMP - PKG signaling pathway;ko04270//Vascular smooth muscle contraction;ko04540//Gap junction;ko04713//Circadian entrainment;ko04970//Salivary secretion;ko04730//Long-term depression;ko04923//Regulation of lipolysis in adipocyte;ko04740//Olfactory transduction	K07376;K07376;K07376;K07376;K07376;K07376;K07376;K07376;K07376;K07376	-	-	-
ncbi_113813834	3	2.99E-56	5.42E-55	TP63	p53 [Litopenaeus vannamei]	Human Diseases;Environmental Information Processing;Cellular Processes	Cancers;Signal transduction;Cell growth and death	ko05206//MicroRNAs in cancer;ko04391//Hippo signaling pathway -fly;ko04214//Apoptosis - fly	K10149;K10149;K10149	-	-	-
ncbi_113813835	2	3.64E-27	4.28E-26	naa38-b	LSM domain-containing protein 1-A-like protein [Coptotermes formosanus]	-	-	-	-	-	-	-
ncbi_113813865	1	1.29E-12	1.03E-11	snk	serine proteinase [Scylla paramamosain]	-	-	-	-	-	-	-
ncbi_113813883	4	4.48E-40	6.46E-39	B3GALT6	Galactosyl T domain containing protein [Trichuris trichiura]	Metabolism;Metabolism	Global and overview maps;Glycan biosynthesis and metabolism	ko01100//Metabolic pathways;ko00601//Glycosphingolipid biosynthesis - lacto and neolacto series	K07819;K07819	-	-	-
ncbi_113813910	2	0	0	--	-	-	-	-	-	-	-	-
ncbi_113813926	2	3.75E-09	2.60E-08	tdrd7a	PREDICTED: tudor domain-containing protein 7-like isoform X2 [Hyalella azteca]	-	-	-	-	-	-	-
ncbi_113813946	3	0	0	--	chitin binding-like protein [Fenneropenaeus chinensis]	-	-	-	-	-	-	-
ncbi_113813963	2	3.55E-49	5.87E-48	Abcf3	PREDICTED: ATP-binding cassette sub-family F member 3-like [Hyalella azteca]	-	-	-	-	-	GO:0015604//organic phosphonate transmembrane transporter activity;GO:0017111//nucleoside-triphosphatase activity;GO:0032550//purine ribonucleoside binding	GO:0044765//single-organism transport
ncbi_113813969	2	5.94E-20	5.91E-19	Polr3f	DNA-directed RNA polymerase III subunit RPC6 [Zootermopsis nevadensis]	Metabolism;Metabolism;Human Diseases;Metabolism;Genetic Information Processing;Organismal Systems	Global and overview maps;Nucleotide metabolism;Infectious diseases;Nucleotide metabolism;Transcription;Immune system	ko01100//Metabolic pathways;ko00230//Purine metabolism;ko05169//Epstein-Barr virus infection;ko00240//Pyrimidine metabolism;ko03020//RNA polymerase;ko04623//Cytosolic DNA-sensing pathway	K03025;K03025;K03025;K03025;K03025;K03025	-	-	GO:0048518//positive regulation of biological process
ncbi_113813970	1	0	0	--	PREDICTED: chymotrypsin-like protease CTRL-1 isoform X1 [Hyalella azteca]	-	-	-	-	-	-	-
ncbi_113813971	4	1.01E-22	1.07E-21	--	PREDICTED: uncharacterized protein LOC108673456 isoform X1 [Hyalella azteca]	-	-	-	-	-	-	-
ncbi_113813982	2	1.73E-29	2.12E-28	ZFAND1	PREDICTED: AN1-type zinc finger protein 1-like [Lingula anatina]	-	-	-	-	-	-	-
ncbi_113813984	2	2.36E-18	2.25E-17	--	-	-	-	-	-	-	-	-
ncbi_113813985	2	3.85E-12	3.01E-11	--	-	-	-	-	-	-	-	-
ncbi_113814017	2	1.07E-09	7.57E-09	--	-	-	-	-	-	-	-	-
ncbi_113814018	2	3.56E-10	2.57E-09	Trap1	PREDICTED: heat shock protein 75 kDa, mitochondrial-like [Hyalella azteca]	-	-	-	-	-	GO:0005515//protein binding	GO:0044267//cellular protein metabolic process;GO:0050896//response to stimulus
ncbi_113814003	5	4.25E-53	7.40E-52	--	PREDICTED: histone-lysine N-methyltransferase 2D-like [Hyalella azteca]	-	-	-	-	-	-	-
ncbi_113814021	4	5.17E-45	7.98E-44	Chmp6	PREDICTED: charged multivesicular body protein 6 [Ceratina calcarata]	Cellular Processes;Cellular Processes	Transport and catabolism;Cell growth and death	ko04144//Endocytosis;ko04217//Necroptosis	K12195;K12195	-	-	-
ncbi_113814035	3	6.59E-89	1.62E-87	--	-	-	-	-	-	-	-	-
ncbi_113814090	3	7.78E-22	8.14E-21	--	-	-	-	-	-	-	-	-
ncbi_113814106	2	1.65E-10	1.20E-09	Ints12	Integrator complex subunit 12, partial [Stegodyphus mimosarum]	-	-	-	-	-	-	-
ncbi_113814166	4	8.12E-35	1.09E-33	TAF10	PREDICTED: transcription initiation factor TFIID subunit 10-like [Branchiostoma belcheri]	Human Diseases;Genetic Information Processing	Infectious diseases;Transcription	ko05168//Herpes simplex infection;ko03022//Basal transcription factors	K03134;K03134	-	-	GO:0032774//RNA biosynthetic process
ncbi_113814195	1	2.35E-16	2.12E-15	--	Nuclear receptor-interacting protein 3, partial [Stegodyphus mimosarum]	-	-	-	-	-	-	-
ncbi_113814210	4	1.18E-70	2.50E-69	CORO1C	Coronin-6 [Daphnia magna]	-	-	-	-	-	-	-
ncbi_113814222	2	9.05E-13	7.24E-12	GE24201	PREDICTED: WD repeat-containing protein 55-like [Hyalella azteca]	-	-	-	-	-	-	-
ncbi_113814234	2	1.36E-146	4.84E-145	--	-	-	-	-	-	-	-	-
ncbi_113814237	4	1.60E-289	8.98E-288	--	PREDICTED: neurogenic locus notch homolog protein 1-like [Hyalella azteca]	-	-	-	-	-	-	-
ncbi_113814239	4	7.39E-09	5.03E-08	--	PREDICTED: uncharacterized protein LOC108673323 [Hyalella azteca]	-	-	-	-	-	-	-
ncbi_113814251	2	1.36E-67	2.79E-66	mRpS26	28S ribosomal protein S26, mitochondrial [Daphnia magna]	-	-	-	-	-	-	-
ncbi_113814254	1	1.63E-22	1.72E-21	--	-	-	-	-	-	-	-	-
ncbi_113814259	3	3.67E-09	2.54E-08	--	variable lymphocyte receptor diversity region, partial [Petromyzon marinus]	-	-	-	-	-	-	-
ncbi_113814264	4	1.83E-37	2.55E-36	EMC4	PREDICTED: ER membrane protein complex subunit 4 [Halyomorpha halys]	-	-	-	-	-	-	-
ncbi_113814263	2	6.27E-09	4.28E-08	DPH1	RecName: Full=Diphthamide biosynthesis protein 1; AltName: Full=DPH1 homolog; AltName: Full=Tumor suppressor-like protein; Short=TSL [Litopenaeus vannamei]	-	-	-	-	GO:0044424//intracellular part	-	GO:0012501//programmed cell death;GO:0017182//peptidyl-diphthamide metabolic process
ncbi_113814275	2	6.88E-46	1.08E-44	--	PREDICTED: uncharacterized protein LOC108665130 [Hyalella azteca]	-	-	-	-	-	-	-
ncbi_113814283	4	2.77E-11	2.09E-10	PTPN12	Tyrosine-protein phosphatase non-receptor type [Daphnia magna]	-	-	-	-	-	GO:0004721//phosphoprotein phosphatase activity	GO:0006470//protein dephosphorylation
ncbi_113814290	4	2.36E-18	2.25E-17	--	Glutaredoxin-3 [Orchesella cincta]	-	-	-	-	-	-	-
ncbi_113814294	3	7.21E-15	6.21E-14	NUDT16	PREDICTED: U8 snoRNA-decapping enzyme-like isoform X1 [Hyalella azteca]	Metabolism;Genetic Information Processing	Nucleotide metabolism;Folding, sorting and degradation	ko00230//Purine metabolism;ko03018//RNA degradation	K16855;K16855	-	GO:0003824//catalytic activity	-
ncbi_113814309	5	1.06E-19	1.04E-18	Gcc2	PREDICTED: GRIP and coiled-coil domain-containing protein 2-like [Hyalella azteca]	-	-	-	-	-	-	GO:1902582//single-organism intracellular transport
ncbi_113814311	3	8.22E-60	1.55E-58	C16orf72	PREDICTED: UPF0472 protein C16orf72 homolog [Priapulus caudatus]	-	-	-	-	-	-	-
ncbi_113814310	2	1.69E-15	1.48E-14	TEgg058p12.1	PREDICTED: UPF0489 protein C5orf22 homolog [Hyalella azteca]	-	-	-	-	-	-	-
ncbi_113814312	4	2.87E-24	3.18E-23	--	-	-	-	-	-	-	-	-
ncbi_113814327	3	2.51E-31	3.20E-30	--	rgs-3, partial [Pristionchus pacificus]	-	-	-	-	-	-	-
ncbi_113814337	3	2.05E-10	1.49E-09	--	-	-	-	-	-	-	-	-
ncbi_113814338	3	2.28E-12	1.79E-11	--	-	-	-	-	-	-	-	-
ncbi_113814348	2	1.78E-19	1.75E-18	Elp3	Elongator complex protein 3 [Zootermopsis nevadensis]	-	-	-	-	-	GO:0016407//acetyltransferase activity;GO:0051540//metal cluster binding	-
ncbi_113814356	3	0	0	omt6	O-methyltransferase [Litopenaeus vannamei]	-	-	-	-	-	-	-
ncbi_113814358	1	1.30E-13	1.07E-12	Suco	PREDICTED: SUN domain-containing ossification factor [Nicrophorus vespilloides]	-	-	-	-	-	-	-
ncbi_113814362	2	4.77E-61	9.17E-60	emc2	PREDICTED: ER membrane protein complex subunit 2-like [Hyalella azteca]	-	-	-	-	-	-	-
ncbi_113814365	4	3.59E-16	3.22E-15	PPAF1	Chymotrypsin-C [Daphnia magna]	-	-	-	-	-	-	-
ncbi_113814367	2	1.85E-09	1.29E-08	--	-	-	-	-	-	-	-	-
ncbi_113814379	2	1.13E-21	1.18E-20	--	Uncharacterized protein APZ42_017057 [Daphnia magna]	-	-	-	-	-	-	-
[truncated: 2,087 more rows]
