# Supplementary material for: Single-cell RNA sequencing analysis of shrimp immune cells identifies macrophage-like phagocytes
Source: eLife. 2022 Oct 6;11:e80127. doi: 10.7554/eLife.80127 (PMC9584607; doi:10.7554/eLife.80127)
Supplement: Supplementary file 10. [file elife-80127-supp10.csv]

#	Species	Cell clusters	Effector genes	Reference
1	Drosophila melanogaster	17 clusters contain 4 subclasses£ºplasmatocyte clusters(PM1-12); crystal cell clusters(CC1-2); lamellocyte clusters(LM1-2); non-hemocyte	Plasmatocytes (Hml, NimC1, CycB, Mmp1, IM18, CecA2, CecC, Mtk, DptB, Drs, Abl, Snoo, Ubx, Cys); Lamellocytes (Atilla, BetaTub60D, AlphaTub85E); Crystal cells (Lz, PPO1, PPO2, Peb, Notch, Spl)	Tattikota, Sudhir Gopal, et al., titled 'A single-cell survey of Drosophila blood', (https://doi.org/10.7554/eLife.54818, Tattikota, Sudhir Gopal, et al., 2020)
2	Drosophila melanogaster	5 clusters contain 5 subclasses£ºplasmatocytes; crystal cells ,lamellocytes); primocytes and thanacytes	Plasmatocytes Srp , Hemese, Pxn, Crq, Eater, NimB4, NimB5); Lamellocytes (Atilla, CAP, Shot, Mthl4); Crystal cells (PPO2, Vav, NijB, St3)	Fu, Yulong, et al., titled 'Single-cell RNA sequencing identifies novel cell types in Drosophila blood', (https://doi.org/10.1016/j.jgg.2020.02.004, Fu, Yulong, et al., 2020)
3	Drosophila melanogaster	7 clusters contain 7 subclasses£º prohemocytes; plasmatocytes, crystal cells; lamellocytes; PSC; GST-rich; adipohemocytes	Plasmatocytes (Hml, Pxn, NimC1); Lamellocytes (Atilla); Crystal cells (Lz, PPO1, PPO2)	Cho B, et al., titled 'Single-cell transcriptome maps of myeloid blood cell lineages in Drosophila', (https://doi.org/10.1038/s41467-020-18135-y, Cho B, et al., 2020)
4	Drosophila melanogaster	16 clusters contain 3 subclasses£ºplasmatocytes(1-13), crystal cells ,lamellocytes(1-2)	plasmatocytes (Sn, Pxn, Hml, Eater, NimC1, Crq, He, Srp); lamellocytes (Mys, Msn, Cher, Atilla, ItgaPS4, PPO3); crystal cells (Lz, Peb, PPO1, PPO2)	Cattenoz P B, et al., titled 'Temporal specificity and heterogeneity of Drosophila immune cells', (https://doi.org/10.15252/embj.2020104486, Cattenoz P B, et al., 2020)
5	Drosophila melanogaster	9 clusters contain 5 subclasses£ºplasmatocytes(1-2,metabolic plasmatocyte cluster, antimicrobial peptide plasmatocyte cluster), crystal cells ,lamellocytes(1-3),	plasmatocytes(Col4a1, Pxn, Eater, Hml, NimC1, Drs, Mtk , CecA1, Hsp24 , Hsp27); lamellocytes(PPO3, Atilla)	Leit?o, et al., titled 'Constitutive activation of cellular immunity underlies the evolution of resistance to infection in Drosophila', (https://doi.org/10.7554/eLife.59095, Leit?o, et al., 2020)
6	Anopheles gambiae	6 clusters contain 5subclasses£ºoenocytoids(HC1), prohemocytes(HC2), granulocyte(HC3-4), megacytes(HC5), small granulocytes(HC6)	HC1(PPO4, PPO9, ); HC2(LRR8, SPARC); HC3-4(LRR8, SPARC,Cyclin B, Aurora kinase); HC5(TM7318, LL3);HC6(Defensin 1, Cecropins 1, C-type lysozyme)	Raddi, Gianmarco, et al., titled 'Mosquito cellular immunity at single-cell resolution', (https://doi.org/10.1126/science.abc0322;Raddi, Gianmarco, et al.,2020)
7	Anopheles gambiae	8 clusters contain 3 subclasses£ºprohemocytes(5);granulocytes(2-4,6); oenocytoids(7-8)	prohemocytes(NimB2, SPARC); granulocytes(Pxn, Eater, LRIM16A, LRR8, LYS I, SCRASP1, SRPN10, LRIM15); oenocytoids(Lz, PPO1, PPO3, PPO8,SCRB9)	Kwon, Hyeogsun, et al., titled 'Single-cell analysis of mosquito hemocytes identifies signatures of immune cell subtypes and cell differentiation', (https://doi.org/10.7554/eLife.66192,Kwon, Hyeogsun, et al.,2021)
8	Bombyx mori	20 clusters contain 4 subclasses£º granulocytes(0,4,6,7,10,17); plasmatocytes(14,15); spherulocytes(19); and oenocytoids(5,8,12,16)	granulocytes(SCR-C, CatB, HP1,PGRP, BmSCRB8, IntegrinaPS3); plasmatocytes(DEGs serine protease homolog 1, Paralytic peptide, Bgrp3, Integrin b3); spherulocytes(cathepsin L-like protein); oenocytoids(PPBP1, PPBP2)	Feng, Min, et al., titled 'Identification of silkworm hemocyte subsets and analysis of their response to baculovirus infection based on single-cell RNA sequencing', (https://doi.org/10.3389/fimmu.2021.645359,Feng, Min, et al.,2021)
9	Penaeus vannamei	5clusters contain 5 subclasses£º prohemocytes; granulocytes; monocytic hemocytes; transitional cells; germ-like cells	prohemocyte(H1f0, TGM1, Igfbp7); monocytic hemocyte(Nlrp3, Lyz1, CHIT1, LIPF, NAGA, zfh1, Casp1, NPC, Vago5, LIMP2, CTSC); granulocyte(PPAF1, PPAF2, PPAF3, PPO3, CRUL, PEN-3, CHF, MAF, c-Rel)	This study
