# Supplementary material for: Single-cell RNA sequencing analysis of shrimp immune cells identifies macrophage-like phagocytes
Source: eLife. 2022 Oct 6;11:e80127. doi: 10.7554/eLife.80127 (PMC9584607; doi:10.7554/eLife.80127)
Supplement: Supplementary file 11. [file elife-80127-supp11.csv]

Top 20 specifically expressed marker genes for transitional cell (TC)
Gene Name	shrimp homolog ID	human homolog gene ID	% nucleotide identity	% nucleotide coverage	% amino acid identity	% amino acid coverage
ncbi_113812066	ncbi_113812066		N. A	N. A	N. A	N. A
ncbi_113812068	ncbi_113812068		N. A	N. A	N. A	N. A
ncbi_113821240	ncbi_113821240		N. A	N. A	N. A	N. A
ncbi_113812069	ncbi_113812069		N. A	N. A	N. A	N. A
Fib	ncbi_113813302	2091	N. A	N. A	78	73
ncbi_113822473	ncbi_113822473		N. A	N. A	N. A	N. A
ncbi_113822332	ncbi_113822332		N. A	N. A	N. A	N. A
PPAF2	ncbi_113812814	2161	N. A	N. A	30	34
Rbm34	ncbi_113809524	23029	N. A	N. A	45	44
ncbi_113818191	ncbi_113818191		N. A	N. A	N. A	N. A
Ahcy13	ncbi_113822949	191	N. A	N. A	79	100
ncbi_113805895	ncbi_113805895	64427	N. A	N. A	37	13
ncbi_113813910	ncbi_113813910		N. A	N. A	N. A	N. A
ncbi_113806303	ncbi_113806303	29997	N. A	N. A	46	16
AAMP	ncbi_113828430	14	N. A	N. A	44	78
ncbi_113822475	ncbi_113822475		N. A	N. A	N. A	N. A
NOP56	ncbi_113803266	10528	N. A	N. A	66	74
Ubr3	ncbi_113829384	130507	N. A	N. A	51	79
ncbi_113821241	ncbi_113821241		N. A	N. A	N. A	N. A
ND5	ncbi_5333211		N. A	N. A	N. A	N. A
Top 20 specifically expressed marker genes for germ-like cell (GC)
Gene Name	shrimp homolog ID	human homolog ID	% nucleotide identity	% nucleotide coverage	% amino acid identity	% amino acid coverage
ncbi_113826700	ncbi_113826700		N. A	N. A	N. A	N. A
ncbi_113813962	ncbi_113813962	3087	N. A	N. A	53	19
ncbi_113830473	ncbi_113830473		N. A	N. A	N. A	N. A
ncbi_113816939	ncbi_113816939		N. A	N. A	N. A	N. A
ncbi_113813667	ncbi_113813667		N. A	N. A	N. A	N. A
ncbi_113823051	ncbi_113823051		N. A	N. A	N. A	N. A
ncbi_113805945	ncbi_113805945		N. A	N. A	N. A	N. A
ncbi_113803297	ncbi_113803297		N. A	N. A	N. A	N. A
ncbi_113802931	ncbi_113802931	149076	N. A	N. A	47	34
AGMAT	ncbi_113803960	79814	N. A	N. A	62	92
lhx9	ncbi_113811310	56956	N. A	N. A	50	27
spir	ncbi_113805357	56907	N. A	N. A	41	27
Esyt2	ncbi_113817041	57488	N. A	N. A	33	77
DIRAS2	ncbi_113823914	54769	N. A	N. A	82	100
ncbi_113818891	ncbi_113818891		N. A	N. A	N. A	N. A
ncbi_113807122	ncbi_113807122		N. A	N. A	N. A	N. A
ncbi_113803272	ncbi_113803272		N. A	N. A	N. A	N. A
aop	ncbi_113824567	2120	N. A	N. A	51	19
Ptprb	ncbi_113821981	5787	N. A	N. A	42	50
ncbi_113820066	ncbi_113820066		N. A	N. A	N. A	N. A
Top 20 specifically expressed marker genes for prohemocyte 1 (PH1)
Gene Name	shrimp homolog ID	human homolog gene ID	% nucleotide identity	% nucleotide coverage	% amino acid identity	% amino acid coverage
CCNB3	ncbi_113829902	85417	N. A	N. A	51	54
INCENP	ncbi_113827798	3619	N. A	N. A	46	8
PRC1	ncbi_113805259	9055	N. A	N. A	31	77
ncbi_113810803	ncbi_113810803		N. A	N. A	N. A	N. A
Cenpe	ncbi_113813509	1062	N. A	N. A	53	12
ncbi_113810390	ncbi_113810390	1063	N. A	N. A	25	15
ASPM	ncbi_113819387	259266	N. A	N. A	33	66
Klp61F	ncbi_113803105	3832	N. A	N. A	58	48
h1f0	ncbi_113821144	3005	N. A	N. A	55	43
ncbi_113809781	ncbi_113809781	6790	N. A	N. A	76	79
PBK	ncbi_113826652	55872	N. A	N. A	47	90
h1f0	ncbi_113821141	3005	N. A	N. A	56	44
ncbi_113807182	ncbi_113807182		N. A	N. A	N. A	N. A
ncbi_113820084	ncbi_113820084		N. A	N. A	N. A	N. A
ncbi_113823166	ncbi_113823166	9787	N. A	N. A	35	78
Mad2l1	ncbi_113827655	4085	N. A	N. A	59	93
CIT	ncbi_113808119	11113	N. A	N. A	33	46
h1f0	ncbi_113821142	3005	N. A	N. A	56	45
ncbi_113823276	ncbi_113823276		N. A	N. A	N. A	N. A
SPDL1	ncbi_113812106	54908	N. A	N. A	32	73
Top 20 specifically expressed marker genes for granulocyte 2 (GH2)
Gene Name	shrimp homolog ID	human homolog gene ID	% nucleotide identity	% nucleotide coverage	% amino acid identity	% amino acid coverage
ncbi_113801830	ncbi_113801830		N. A	N. A	N. A	N. A
PPAF3	ncbi_113800184	341350	N. A	N. A	32	57
ncbi_113801828	ncbi_113801828		N. A	N. A	N. A	N. A
ncbi_113801827	ncbi_113801827		N. A	N. A	N. A	N. A
Pxt	ncbi_113820161	7837	N. A	N. A	38	71
ncbi_113810905	ncbi_113810905		N. A	N. A	N. A	N. A
ncbi_113810909	ncbi_113810909		N. A	N. A	N. A	N. A
ncbi_113801821	ncbi_113801821		N. A	N. A	N. A	N. A
PPAF2	ncbi_113804200	3818	N. A	N. A	33	24
ncbi_113811243	ncbi_113811243		N. A	N. A	N. A	N. A
ENPP3	ncbi_113806994	5169	N. A	N. A	35	92
ncbi_113808014	ncbi_113808014		N. A	N. A	N. A	N. A
PPAF2	ncbi_113802496	1506	N. A	N. A	35	69
ncbi_113808543	ncbi_113808543		N. A	N. A	N. A	N. A
Pxt	ncbi_113820150	7837	N. A	N. A	38	70
ncbi_113819749	ncbi_113819749	2263	N. A	N. A	24	37
ncbi_113816771	ncbi_113816771		N. A	N. A	N. A	N. A
SLC5A1	ncbi_113828571	6523	N. A	N. A	48	95
lcc1	ncbi_113802330	9843	N. A	N. A	48	7
snk	ncbi_113807427	9407	N. A	N. A	36	91
Top 60 specifically expressed marker genes for monocytic hemocyte 2 (MH2)
Gene Name	shrimp homolog ID	human homolog gene ID	% nucleotide identity	% nucleotide coverage	% amino acid identity	% amino acid coverage
Angpt4	ncbi_113804729	23452	N. A	N. A	37	25
ncbi_113826144	ncbi_113826144	4897	N. A	N. A	40	18
ncbi_113812270	ncbi_113812270		N. A	N. A	N. A	N. A
ncbi_113823074	ncbi_113823074		N. A	N. A	N. A	N. A
ALF	ncbi_113820510		N. A	N. A	N. A	N. A
ITGA2B	ncbi_113815644	3678	N. A	N. A	33	29
ncbi_113810024	ncbi_113810024		N. A	N. A	N. A	N. A
CHIT1	ncbi_113822241	1118	N. A	N. A	46	55
chic	ncbi_113812492		N. A	N. A	N. A	N. A
ncbi_113811918	ncbi_113811918	29121	N. A	N. A	27	51.6
ncbi_113810108	ncbi_113810108		N. A	N. A	N. A	N. A
ncbi_113813946	ncbi_113813946		N. A	N. A	N. A	N. A
ncbi_113810025	ncbi_113810025	3061	N. A	N. A	29	26
fax	ncbi_113800918	84553	N. A	N. A	31	61
GGH	ncbi_113829328	8836	N. A	N. A	40	64
Lyz1	ncbi_113802295	4069	N. A	N. A	45	55
LIPF	ncbi_113823443	3988	N. A	N. A	37	98
Tl	ncbi_113824360	131578	N. A	N. A	33	40
ncbi_113806935	ncbi_113806935		N. A	N. A	N. A	N. A
ncbi_113812219	ncbi_113812219	9902	N. A	N. A	29	35
ncbi_113823707	ncbi_113823707	10875	N. A	N. A	29	35
ncbi_113825861	ncbi_113825861	84929	N. A	N. A	40	77
LGMN	ncbi_113827868	5641	N. A	N. A	53	79
ncbi_113800836	ncbi_113800836	57030	N. A	N. A	28	95
ncbi_113818495	ncbi_113818495		N. A	N. A	N. A	N. A
Nlrp3	ncbi_113828560	114548	N. A	N. A	25	26
ncbi_113826852	ncbi_113826852		N. A	N. A	N. A	N. A
ncbi_113823075	ncbi_113823075	4036	N. A	N. A	62	9
ncbi_113802813	ncbi_113802813	283537	N. A	N. A	23	47
NAGA	ncbi_113810366	4668	N. A	N. A	52	92
ncbi_113829941	ncbi_113829941		N. A	N. A	N. A	N. A
ncbi_113804553	ncbi_113804553		N. A	N. A	N. A	N. A
ncbi_113827405	ncbi_113827405	100131187	N. A	N. A	34	47
ncbi_113803502	ncbi_113803502		N. A	N. A	N. A	N. A
MEGF11	ncbi_113823866	84466	N. A	N. A	44	86
ncbi_113817215	ncbi_113817215	342510	N. A	N. A	27	43
ncbi_113815885	ncbi_113815885	6659	86	2	66	20
Ttf2	ncbi_113824440	8458	N. A	N. A	45	34
ncbi_113803783	ncbi_113803783		N. A	N. A	N. A	N. A
ncbi_113803501	ncbi_113803501		N. A	N. A	N. A	N. A
Gs2	ncbi_113803894	2752	N. A	N. A	68	98
ncbi_113816639	ncbi_113816639		N. A	N. A	N. A	N. A
zfh1	ncbi_113824903	6935	N. A	N. A	77	22
ncbi_113800266	ncbi_113800266		N. A	N. A	N. A	N. A
PRDX5	ncbi_113807833	25824	N. A	N. A	54	82
ncbi_113810290	ncbi_113810290		N. A	N. A	N. A	N. A
Ras64B	ncbi_113809589	22800	N. A	N. A	76	85
ncbi_113812463	ncbi_113812463		N. A	N. A	N. A	N. A
ncbi_113806506	ncbi_113806506		N. A	N. A	N. A	N. A
ncbi_113810214	ncbi_113810214		N. A	N. A	N. A	N. A
ncbi_113803496	ncbi_113803496	80031	N. A	N. A	39	64
Clca4a	ncbi_113800211	22802	N. A	N. A	32	88
Casp1	ncbi_113800234	841	N. A	N. A	26	51
ncbi_113805453	ncbi_113805453		N. A	N. A	N. A	N. A
ncbi_113830025	ncbi_113830025		N. A	N. A	N. A	N. A
NPC2	ncbi_113806913	10577	N. A	N. A	37	53
ncbi_113800422	ncbi_113800422	3949	N. A	N. A	31	29
Hr96	ncbi_113804121	7421	N. A	N. A	52	40
MP1	ncbi_113824294	1506	N. A	N. A	37	70
ncbi_113824399	ncbi_113824399		N. A	N. A	N. A	N. A
Top 20 specifically expressed marker genes for prohemocyte 2 (PH2)
Gene Name	shrimp homolog ID	human homolog gene ID	% nucleotide identity	% nucleotide coverage	% amino acid identity	% amino acid coverage
TGM1	ncbi_113823934	7051	N. A	N. A	38	66
ncbi_113805892	ncbi_113805892		N. A	N. A	N. A	N. A
ncbi_113823945	ncbi_113823945		N. A	N. A	N. A	N. A
ncbi_113814237	ncbi_113814237		N. A	N. A	N. A	N. A
ncbi_113803465	ncbi_113803465		N. A	N. A	N. A	N. A
Igfbp7	ncbi_113811702	51232	N. A	N. A	31	42
ncbi_113808957	ncbi_113808957	221806	N. A	N. A	33	42
PPAF2	ncbi_113812814	2161	N. A	N. A	30	34
pyx	ncbi_113812900	287	N. A	N. A	28	36
Grik2	ncbi_113823802	2898	N. A	N. A	44	87
Cpa1	ncbi_113825742	1357	N. A	N. A	34	90
Rab27a	ncbi_113829827	5873	N. A	N. A	72	58
Ctrc	ncbi_113819328	9407	N. A	N. A	41	50
ncbi_113800422	ncbi_113800422	3949	N. A	N. A	31	29
His2A	ncbi_113829109	221613	N. A	N. A	88	82
ncbi_113809022	ncbi_113809022		N. A	N. A	N. A	N. A
ncbi_113823668	ncbi_113823668		N. A	N. A	N. A	N. A
ncbi_113826594	ncbi_113826594		N. A	N. A	N. A	N. A
ncbi_113802865	ncbi_113802865		N. A	N. A	N. A	N. A
Mgst1	ncbi_113822637	4257	N. A	N. A	40	94
Top 20 specifically expressed marker genes for granulocyte 1 (GH1)
Gene Name	shrimp homolog ID	human homolog gene ID	% nucleotide identity	% nucleotide coverage	% amino acid identity	% amino acid coverage
RGN	ncbi_113826969	9104	N. A	N. A	38	91
rgn	ncbi_113807911	9104	N. A	N. A	48	63
ncbi_113800677	ncbi_113800677		N. A	N. A	N. A	N. A
ncbi_113815774	ncbi_113815774		N. A	N. A	N. A	N. A
ncbi_113802174	ncbi_113802174		N. A	N. A	N. A	N. A
PPAF2	ncbi_113802490	7177	N. A	N. A	37	60
Arg2	ncbi_113811237	384	N. A	N. A	45	99
ncbi_113813598	ncbi_113813598	5654	N. A	N. A	35	51
ncbi_113818447	ncbi_113818447		N. A	N. A	N. A	N. A
ncbi_113810419	ncbi_113810419		N. A	N. A	N. A	N. A
ncbi_113801793	ncbi_113801793		N. A	N. A	N. A	N. A
ncbi_113821158	ncbi_113821158		N. A	N. A	N. A	N. A
ncbi_113802754	ncbi_113802754		N. A	N. A	N. A	N. A
Ces2c	ncbi_113812972	590	N. A	N. A	31	89
PPAF2	ncbi_113828564	64499	N. A	N. A	35	48
A2ML1	ncbi_113826593	5858	N. A	N. A	30	94
SPE	ncbi_113828686	56649	N. A	N. A	32	68
PPO1	ncbi_113828743		N. A	N. A	N. A	N. A
ncbi_113802179	ncbi_113802179		N. A	N. A	N. A	N. A
PPO3	ncbi_113827090		N. A	N. A	N. A	N. A
Top 20 specifically expressed marker genes for monocytic hemocyte 1 (MH1)
Gene Name	shrimp homolog ID	human homolog gene ID	% nucleotide identity	% nucleotide coverage	% amino acid identity	% amino acid coverage
ncbi_113809352	ncbi_113809352		N/A	N/A	N/A	N/A
ncbi_113823524	ncbi_113823524		N/A	N/A	N/A	N/A
thbs4	ncbi_113823118	7059	N/A	N/A	60	59
ncbi_113800108	ncbi_113800108		N/A	N/A	N/A	N/A
ncbi_113817695	ncbi_113817695		N/A	N/A	N/A	N/A
ncbi_113800109	ncbi_113800109		N/A	N/A	N/A	N/A
ncbi_113816490	ncbi_113816490		N/A	N/A	N/A	N/A
ncbi_113823512	ncbi_113823512		N/A	N/A	N/A	N/A
Nlrp3	ncbi_113828560	114548	N/A	N/A	25	26
ncbi_113823500	ncbi_113823500		N/A	N/A	N/A	N/A
ncbi_113816639	ncbi_113816639		N/A	N/A	N/A	N/A
ncbi_113800107	ncbi_113800107		N/A	N/A	N/A	N/A
ncbi_113830149	ncbi_113830149		N/A	N/A	N/A	N/A
ncbi_113802107	ncbi_113802107	4738	N/A	N/A	32	44
nrv2	ncbi_113810268	481	N/A	N/A	33	88
Drice	ncbi_113805238	840	N/A	N/A	31	81
Lyz1	ncbi_113802295	4069	N/A	N/A	45	55
SULT1C4	ncbi_113827852	27233	N/A	N/A	35	95
ncbi_113820575	ncbi_113820575		N/A	N/A	N/A	N/A
ncbi_113823707	ncbi_113823707	10875	N/A	N/A	29	35
