# Supplementary figures and images for: Single-cell RNA sequencing analysis of shrimp immune cells identifies macrophage-like phagocytes
Source: eLife journal article supplement (doi:10.7554/elife.80127), 2022-10-06

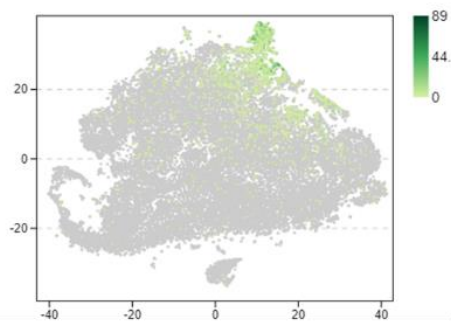

***CHIT1* (ncbi\_113822241)**

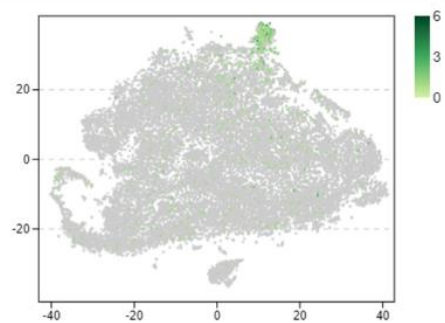

***LIPF* (ncbi\_113823443)**

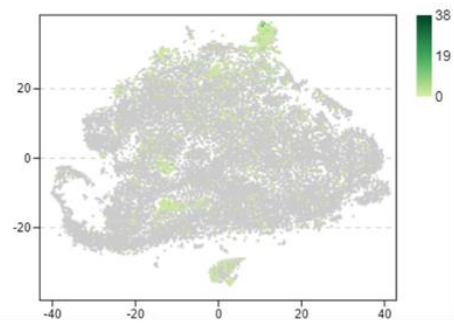

***LGMN* (ncbi\_113827868)**

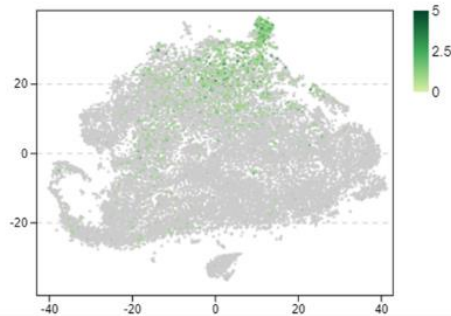

***NAGA* (ncbi\_113810366)**

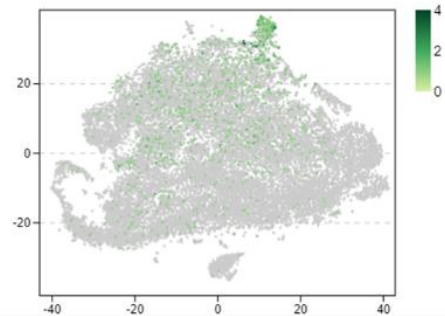

***zfh1* (ncbi\_113824903)**

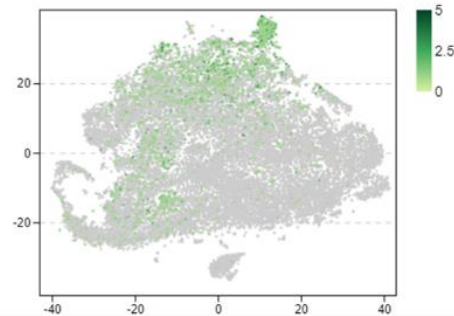

***Casp1* (ncbi\_113800234)**

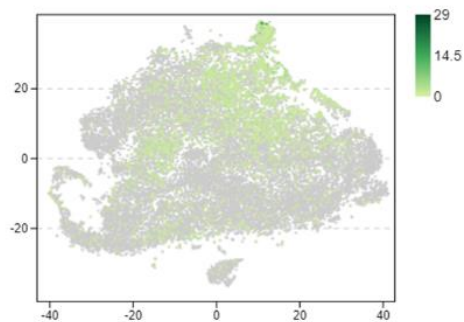

***NPC2* (ncbi\_113806913)**

Supplement: supp [file elife-80127-supp-v1.zip]
